# Supplementary material for: A metabolic modeling-based framework for predicting trophic dependencies in native rhizobiomes of crop plants
Source: bioRxiv preprint, doi:10.1101/2023.12.11.571117, version 2 (2024-07-07)
Supplement: Genomic characteristics of MAGs [file 571117_file02.xlsx]

## Sheet: 395 bins
MAG name	Cluster number in dRep	Completeness ≥90	Contamination ≤5	N50	Size	GTDB-tk
a.bin.1	362_1	93.09	2.564	113160	5045970	d__Bacteria;p__Acidobacteriota;c__Blastocatellia;o__Pyrinomonadales;f__Pyrinomonadaceae;g__OLB17;s__
a.bin.10	124_1	93.46	4.788	20444	2947053	d__Bacteria;p__Verrucomicrobiota;c__Verrucomicrobiae;o__Chthoniobacterales;f__UBA10450;g__;s__
a.bin.100	325_1	98.9	1.098	24839	2918785	d__Bacteria;p__Eisenbacteria;c__RBG-16-71-46;o__SZUA-252;f__SZUA-252;g__WS-7;s__
a.bin.119	340_1	96.58	4.925	19456	4904992	d__Bacteria;p__Acidobacteriota;c__Thermoanaerobaculia;o__UBA5066;f__Gp7-AA6;g__;s__
a.bin.123	206_1	95.6	4.522	41503	6583146	d__Bacteria;p__Proteobacteria;c__Alphaproteobacteria;o__Rhizobiales;f__Xanthobacteraceae;g__P52-10;s__
a.bin.125	296_1	91.17	2.631	16619	10445391	d__Bacteria;p__Acidobacteriota;c__Acidobacteriae;o__Bryobacterales;f__Bryobacteraceae;g__;s__
a.bin.126	310_1	91.29	4.782	7156	2959228	d__Bacteria;p__Acidobacteriota;c__Acidobacteriae;o__UBA7541;f__UBA7541;g__;s__
a.bin.128	49_1	93.51	0	110890	4974967	d__Bacteria;p__Armatimonadota;c__Abditibacteria;o__Abditibacteriales;f__Abditibacteriaceae;g__Abditibacterium;s__
a.bin.13	223_1	98.85	0	45001	7224690	d__Bacteria;p__Planctomycetota;c__Planctomycetes;o__Pirellulales;f__Pirellulaceae;g__;s__
a.bin.138	33_1	94.18	2.504	9512	4522502	d__Bacteria;p__Bacteroidota;c__Bacteroidia;o__Chitinophagales;f__Chitinophagaceae;g__Flavisolibacter;s__
a.bin.139	79_1	94.08	1.171	55261	3293985	d__Bacteria;p__Actinobacteriota;c__Actinomycetia;o__Mycobacteriales;f__;g__;s__
a.bin.14	112_1	96.43	2.717	57393	4128155	d__Bacteria;p__Proteobacteria;c__Gammaproteobacteria;o__Steroidobacterales;f__Steroidobacteraceae;g__CAILZL01;s__
a.bin.140	30_1	96.91	0.985	24966	4845261	d__Bacteria;p__Bacteroidota;c__Bacteroidia;o__Chitinophagales;f__Chitinophagaceae;g__UTBCD1;s__
a.bin.143	263_1	97.23	2.899	46507	3668515	d__Bacteria;p__Proteobacteria;c__Gammaproteobacteria;o__Xanthomonadales;f__Xanthomonadaceae;g__;s__
a.bin.144	364_1	92.94	3.466	10443	7469449	d__Bacteria;p__Acidobacteriota;c__Blastocatellia;o__UBA7656;f__UBA7656;g__;s__
a.bin.151	338_1	96.18	1.282	119842	3146754	d__Bacteria;p__Gemmatimonadota;c__Gemmatimonadetes;o__Gemmatimonadales;f__GWC2-71-9;g__AG25;s__
a.bin.159	39_1	93.05	0.925	410051	4685930	d__Bacteria;p__Armatimonadota;c__Fimbriimonadia;o__Fimbriimonadales;f__Fimbriimonadaceae;g__;s__
a.bin.16	176_1	93.07	1.173	20870	3435483	d__Bacteria;p__Proteobacteria;c__Alphaproteobacteria;o__Sphingomonadales;f__Sphingomonadaceae;g__Allosphingosinicella;s__
a.bin.160	249_1	97.06	1.132	204801	3747856	d__Bacteria;p__Proteobacteria;c__Gammaproteobacteria;o__Nevskiales;f__Nevskiaceae;g__;s__
a.bin.163	153_1	90.74	0.791	74776	3851396	d__Bacteria;p__Proteobacteria;c__Alphaproteobacteria;o__Rhizobiales;f__Xanthobacteraceae;g__Pseudolabrys;s__
a.bin.166	174_1	95.38	0.956	19465	3110924	d__Bacteria;p__Proteobacteria;c__Alphaproteobacteria;o__Sphingomonadales;f__Sphingomonadaceae;g__Allosphingosinicella;s__
a.bin.168	167_1	90.39	2.36	25626	4427218	d__Bacteria;p__Proteobacteria;c__Alphaproteobacteria;o__Sphingomonadales;f__Sphingomonadaceae;g__Novosphingobium;s__
a.bin.181	94_1	97.43	2.516	22198	4757324	d__Bacteria;p__Actinobacteriota;c__Acidimicrobiia;o__Acidimicrobiales;f__Ilumatobacteraceae;g__;s__
a.bin.190	357_1	96.58	4.444	58653	7696484	d__Bacteria;p__Acidobacteriota;c__Blastocatellia;o__Pyrinomonadales;f__Pyrinomonadaceae;g__;s__
a.bin.200	298_1	96.92	3.07	344995	11480903	d__Bacteria;p__Acidobacteriota;c__Acidobacteriae;o__Bryobacterales;f__Bryobacteraceae;g__PALSA-129;s__
a.bin.207	26_1	95.96	2.096	27231	4831139	d__Bacteria;p__Bacteroidota;c__Bacteroidia;o__Chitinophagales;f__LD1;g__UBA1941;s__
a.bin.21	285_1	90.53	3.579	8724	6792717	d__Bacteria;p__Planctomycetota;c__MHYJ01;o__MHYJ01;f__;g__;s__
a.bin.210	235_1	92.2	4.368	17772	5115405	d__Bacteria;p__Acidobacteriota;c__Acidobacteriae;o__Acidobacteriales;f__Koribacteraceae;g__;s__
a.bin.213	155_1	94.68	2.463	39794	3998441	d__Bacteria;p__Proteobacteria;c__Alphaproteobacteria;o__Rhizobiales;f__Xanthobacteraceae;g__Pseudolabrys;s__
a.bin.221	18_1	90.2	1.97	6962	3755355	d__Bacteria;p__Bacteroidota;c__Bacteroidia;o__Chitinophagales;f__Chitinophagaceae;g__Flavisolibacter;s__
a.bin.228	243_1	93.3	0.94	52640	3157805	d__Bacteria;p__Actinobacteriota;c__Thermoleophilia;o__Solirubrobacterales;f__Solirubrobacteraceae;g__Palsa-744;s__
a.bin.231	274_1	90.1	0.549	19514	3753410	d__Bacteria;p__Eisenbacteria;c__RBG-16-71-46;o__RBG-16-71-46;f__RBG-16-71-46;g__WS-3;s__
a.bin.235	365_1	95.41	1.743	76194	6579656	d__Bacteria;p__Chloroflexota;c__Chloroflexia;o__54-19;f__;g__;s__
a.bin.238	187_1	94.59	0.758	51937	2965173	d__Bacteria;p__Proteobacteria;c__Alphaproteobacteria;o__Sphingomonadales;f__Sphingomonadaceae;g__Sphingomicrobium;s__
a.bin.239	320_1	99.93	0	147068	7524546	d__Bacteria;p__Planctomycetota;c__Planctomycetes;o__Pirellulales;f__UBA1268;g__;s__
a.bin.24	312_1	94.11	4.369	59492	4986930	d__Bacteria;p__Desulfobacterota_B;c__Binatia;o__UBA9968;f__UBA9968;g__2-12-FULL-60-19;s__
a.bin.243	165_1	93.34	3.164	55340	5813174	d__Bacteria;p__Proteobacteria;c__Alphaproteobacteria;o__Rhizobiales;f__Labraceae;g__Labrys;s__
a.bin.244	106_1	92.18	1.851	11445	2063628	d__Bacteria;p__Chloroflexota;c__Ellin6529;o__QHBO01;f__QHBO01;g__CF-167;s__
a.bin.259	233_1	91.93	3.589	29604	7093634	d__Bacteria;p__Acidobacteriota;c__Vicinamibacteria;o__Vicinamibacterales;f__UBA2999;g__;s__
a.bin.270	313_1	98.95	0.777	61647	6415540	d__Bacteria;p__Proteobacteria;c__Alphaproteobacteria;o__Acetobacterales;f__Acetobacteraceae;g__Palsa-883;s__
a.bin.272	184_1	99.56	0.184	188421	2984898	d__Bacteria;p__Proteobacteria;c__Alphaproteobacteria;o__Micropepsales;f__Micropepsaceae;g__Rhizomicrobium;s__
a.bin.294	132_1	99.32	2.641	82134	6943654	d__Bacteria;p__Verrucomicrobiota;c__Verrucomicrobiae;o__Chthoniobacterales;f__Chthoniobacteraceae;g__;s__
a.bin.296	59_1	93.5	4.395	60586	3954023	d__Bacteria;p__Gemmatimonadota;c__Gemmatimonadetes;o__Longimicrobiales;f__RSA9;g__;s__
a.bin.297	24_1	99.26	1.505	176111	7180952	d__Bacteria;p__Bacteroidota;c__Bacteroidia;o__Chitinophagales;f__Chitinophagaceae;g__Puia;s__
a.bin.298	190_1	94.12	1.917	18429	2522330	d__Bacteria;p__Proteobacteria;c__Alphaproteobacteria;o__Sphingomonadales;f__Sphingomonadaceae;g__Sphingomicrobium;s__
a.bin.3	111_1	91.36	3.659	47255	3847237	d__Bacteria;p__Proteobacteria;c__Gammaproteobacteria;o__Steroidobacterales;f__Steroidobacteraceae;g__13-2-20CM-66-19;s__
a.bin.303	67_1	96.02	1.33	14491	5559971	d__Bacteria;p__Bacteroidota;c__Bacteroidia;o__Chitinophagales;f__Chitinophagaceae;g__Parafilimonas;s__
a.bin.319	354_1	98.29	4.32	119868	5492639	d__Bacteria;p__Acidobacteriota;c__Blastocatellia;o__Pyrinomonadales;f__Pyrinomonadaceae;g__JACVRN01;s__
a.bin.321	343_1	96.58	2.564	432345	5108464	d__Bacteria;p__Acidobacteriota;c__Acidobacteriae;o__UBA7541;f__UBA7541;g__Palsa-147;s__
a.bin.322	40_1	94.71	2.557	37478	4814636	d__Bacteria;p__Chloroflexota;c__Ktedonobacteria;o__Ktedonobacterales;f__;g__;s__
a.bin.329	348_1	98.07	2.564	189191	6932970	d__Bacteria;p__Acidobacteriota;c__Blastocatellia;o__Pyrinomonadales;f__Pyrinomonadaceae;g__UBA11740;s__
a.bin.344	265_1	90.75	4.077	10717	3678860	d__Bacteria;p__Proteobacteria;c__Gammaproteobacteria;o__Xanthomonadales;f__Rhodanobacteraceae;g__;s__
a.bin.345	73_1	96.16	1.379	76822	8997255	d__Bacteria;p__Planctomycetota;c__Planctomycetes;o__Planctomycetales;f__UBA10511;g__SIAF01;s__
a.bin.347	136_1	98.54	4.995	106808	6813945	d__Bacteria;p__Verrucomicrobiota;c__Verrucomicrobiae;o__Opitutales;f__Opitutaceae;g__ER46;s__
a.bin.348	363_1	94.87	3.418	151853	5903855	d__Bacteria;p__Acidobacteriota;c__Blastocatellia;o__Pyrinomonadales;f__Pyrinomonadaceae;g__OLB17;s__
a.bin.350	37_1	92.12	0.925	273972	3559552	d__Bacteria;p__Armatimonadota;c__Fimbriimonadia;o__Fimbriimonadales;f__Fimbriimonadaceae;g__;s__
a.bin.356	114_1	92.47	0.358	150879	2222977	d__Bacteria;p__Omnitrophota;c__Koll11;o__2-02-FULL-51-18;f__2-02-FULL-51-18;g__;s__
a.bin.368	305_1	95.6	2.197	8455	3655490	d__Bacteria;p__Gemmatimonadota;c__Gemmatimonadetes;o__Gemmatimonadales;f__GWC2-71-9;g__;s__
a.bin.370	311_1	90.46	2.58	26873	7309718	d__Bacteria;p__Desulfobacterota_B;c__Binatia;o__HRBIN30;f__CADEER01;g__;s__
a.bin.374	154_1	92.95	2.183	36290	4086793	d__Bacteria;p__Proteobacteria;c__Alphaproteobacteria;o__Rhizobiales;f__Xanthobacteraceae;g__Pseudolabrys;s__
a.bin.38	129_1	96.73	0.337	149520	3095226	d__Bacteria;p__Verrucomicrobiota;c__Verrucomicrobiae;o__Chthoniobacterales;f__UBA10450;g__;s__
a.bin.387	50_1	97.7	4.665	29013	10713699	d__Bacteria;p__Planctomycetota;c__Planctomycetes;o__Pirellulales;f__PNKZ01;g__;s__
a.bin.389	92_1	92.43	3.162	11502	2852263	d__Bacteria;p__Actinobacteriota;c__Acidimicrobiia;o__IMCC26256;f__PALSA-555;g__;s__
a.bin.39	182_1	91.69	1.739	44724	3609940	d__Bacteria;p__Proteobacteria;c__Alphaproteobacteria;o__Micropepsales;f__Micropepsaceae;g__CAIYRG01;s__
a.bin.390	128_1	93.72	3.08	10832	3228252	d__Bacteria;p__Verrucomicrobiota;c__Verrucomicrobiae;o__Chthoniobacterales;f__UBA10450;g__Palsa-1392;s__
a.bin.402	78_1	92.05	2.003	11637	5868705	d__Bacteria;p__Actinobacteriota;c__Actinomycetia;o__Mycobacteriales;f__Frankiaceae;g__;s__
a.bin.413	87_1	94.22	1.293	30622	3488667	d__Bacteria;p__Actinobacteriota;c__Thermoleophilia;o__Solirubrobacterales;f__Thermoleophilaceae;g__;s__
a.bin.419	75_1	97.8	2.197	130028	5138122	d__Bacteria;p__Gemmatimonadota;c__Gemmatimonadetes;o__Gemmatimonadales;f__Gemmatimonadaceae;g__;s__
a.bin.420	2_1	91.49	1.937	49896	3525202	d__Bacteria;p__Proteobacteria;c__Gammaproteobacteria;o__DSM-16500;f__DSM-16500;g__Aquicella_A;s__
a.bin.426	93_1	92.15	3.846	23837	3865239	d__Bacteria;p__Actinobacteriota;c__Acidimicrobiia;o__IMCC26256;f__IMCC26256;g__;s__
a.bin.431	328_1	97.14	0.333	130069	5142056	d__Bacteria;p__Bacteroidota;c__Bacteroidia;o__Sphingobacteriales;f__Sphingobacteriaceae;g__Mucilaginibacter;s__
a.bin.49	130_1	100	2.364	161307	3145014	d__Bacteria;p__Verrucomicrobiota;c__Verrucomicrobiae;o__Chthoniobacterales;f__UBA10450;g__Palsa-1382;s__
a.bin.5	308_1	96.78	3.409	64037	8250864	d__Bacteria;p__Planctomycetota;c__Phycisphaerae;o__UBA1161;f__UBA1161;g__;s__
a.bin.55	366_1	90.26	2.805	21349	6857046	d__Bacteria;p__Chloroflexota;c__UBA6077;o__UBA6077;f__CF-72;g__CF-72;s__
a.bin.58	62_1	91.9	2.197	17408	2888233	d__Bacteria;p__Gemmatimonadota;c__Gemmatimonadetes;o__Gemmatimonadales;f__GWC2-71-9;g__Palsa-1233;s__
a.bin.59	122_1	97.97	4.729	74402	3648966	d__Bacteria;p__Verrucomicrobiota;c__Verrucomicrobiae;o__Chthoniobacterales;f__UBA10450;g__AV80;s__
a.bin.67	84_1	97.04	1.724	68599	2601415	d__Bacteria;p__Actinobacteriota;c__Thermoleophilia;o__Solirubrobacterales;f__70-9;g__;s__
a.bin.69	381_1	99.09	1.709	399842	5465215	d__Bacteria;p__Acidobacteriota;c__Acidobacteriae;o__Acidobacteriales;f__Koribacteraceae;g__QIAJ01;s__
a.bin.70	333_1	96.48	0	66851	6497697	d__Bacteria;p__Planctomycetota;c__Planctomycetes;o__Pirellulales;f__Ga0077529;g__;s__
a.bin.71	144_1	91.02	2.123	12124	4528738	d__Bacteria;p__Acidobacteriota;c__Thermoanaerobaculia;o__UBA5066;f__Gp7-AA6;g__;s__
a.bin.72	99_1	97.85	2.564	62979	6928983	d__Bacteria;p__Acidobacteriota;c__Thermoanaerobaculia;o__Gp7-AA8;f__Gp7-AA8;g__;s__
a.bin.73	125_1	90.02	2.394	12168	2400240	d__Bacteria;p__Verrucomicrobiota;c__Verrucomicrobiae;o__Chthoniobacterales;f__UBA10450;g__;s__
a.bin.80	384_1	98.97	3.418	315101	8090598	d__Bacteria;p__Acidobacteriota;c__Acidobacteriae;o__Acidobacteriales;f__Koribacteraceae;g__Sulfotelmatobacter;s__
a.bin.9	140_1	91.07	3.713	18752	4607697	d__Bacteria;p__Proteobacteria;c__Gammaproteobacteria;o__Steroidobacterales;f__Steroidobacteraceae;g__CADEED01;s__
a.bin.96	264_1	96.89	4.534	27823	4030550	d__Bacteria;p__Proteobacteria;c__Gammaproteobacteria;o__Xanthomonadales;f__Rhodanobacteraceae;g__;s__
a.bin.99	303_1	91.2	1.098	14434	3272151	d__Bacteria;p__Gemmatimonadota;c__Gemmatimonadetes;o__Gemmatimonadales;f__GWC2-71-9;g__;s__
b.bin.102	134_1	100	3.885	380398	6442262	d__Bacteria;p__Verrucomicrobiota;c__Verrucomicrobiae;o__Pedosphaerales;f__Palsa-1400;g__;s__
b.bin.104	231_1	98.41	2.106	87934	7247461	d__Bacteria;p__Proteobacteria;c__Gammaproteobacteria;o__Burkholderiales;f__SHXO01;g__;s__
b.bin.107	38_1	91.25	0.925	30173	4417191	d__Bacteria;p__Armatimonadota;c__Fimbriimonadia;o__Fimbriimonadales;f__Fimbriimonadaceae;g__;s__
b.bin.11	157_1	92.16	2.056	18686	3487505	d__Bacteria;p__Proteobacteria;c__Alphaproteobacteria;o__Rhizobiales;f__Xanthobacteraceae;g__Pseudolabrys;s__
b.bin.111	247_1	96.75	0	50970	3092857	d__Bacteria;p__Eremiobacterota;c__Eremiobacteria;o__Baltobacterales;f__Baltobacteraceae;g__Tumulicola;s__
b.bin.115	218_1	98.72	1.916	51642	3755194	d__Bacteria;p__Proteobacteria;c__Alphaproteobacteria;o__Caulobacterales;f__Hyphomonadaceae;g__;s__
b.bin.12	188_1	94.65	3.65	48824	3325010	d__Bacteria;p__Proteobacteria;c__Alphaproteobacteria;o__Sphingomonadales;f__Sphingomonadaceae;g__Sphingomicrobium;s__
b.bin.124	172_1	97.24	0.015	85257	6011708	d__Bacteria;p__Proteobacteria;c__Alphaproteobacteria;o__Sphingomonadales;f__Sphingomonadaceae;g__Rhizorhabdus;s__
b.bin.127	379_1	95.72	1.88	27914	3424369	d__Bacteria;p__Acidobacteriota;c__Blastocatellia;o__Pyrinomonadales;f__Pyrinomonadaceae;g__OLB17;s__
b.bin.130	31_1	93.13	4.532	8195	5244902	d__Bacteria;p__Bacteroidota;c__Bacteroidia;o__Chitinophagales;f__Chitinophagaceae;g__UTBCD1;s__
b.bin.131	260_1	99.46	2.61	110305	4538394	d__Bacteria;p__Proteobacteria;c__Gammaproteobacteria;o__Xanthomonadales;f__Rhodanobacteraceae;g__Dokdonella_A;s__
b.bin.135	262_1	95.48	2.709	28474	4828457	d__Bacteria;p__Proteobacteria;c__Gammaproteobacteria;o__Xanthomonadales;f__Ahniellaceae;g__;s__
b.bin.137	232_1	97.27	4.083	25254	7547005	d__Bacteria;p__Proteobacteria;c__Gammaproteobacteria;o__Burkholderiales;f__SHXO01;g__;s__
b.bin.14	115_1	92.47	0	11774	2225735	d__Bacteria;p__Omnitrophota;c__Omnitrophia;o__Omnitrophales;f__GWA2-52-8;g__;s__
b.bin.141	119_1	99.32	2.702	82243	5307339	d__Bacteria;p__Verrucomicrobiota;c__Verrucomicrobiae;o__Pedosphaerales;f__UBA3939;g__BOG-1460;s__
b.bin.149	257_1	97.37	1.958	79545	4569684	d__Bacteria;p__Proteobacteria;c__Gammaproteobacteria;o__Xanthomonadales;f__Rhodanobacteraceae;g__;s__
b.bin.150	269_1	96.09	3.248	129782	6851923	d__Bacteria;p__Myxococcota;c__Polyangia;o__Polyangiales;f__Polyangiaceae;g__;s__
b.bin.158	316_1	99.28	1.477	60156	6723621	d__Bacteria;p__Actinobacteriota;c__Actinomycetia;o__Mycobacteriales;f__Pseudonocardiaceae;g__Amycolatopsis;s__Amycolatopsis sulphurea
b.bin.159	161_1	96.01	2.892	66617	7372625	d__Bacteria;p__Proteobacteria;c__Alphaproteobacteria;o__Rhizobiales;f__Xanthobacteraceae;g__Bradyrhizobium;s__
b.bin.160	117_1	96.72	3.513	26037	5641942	d__Bacteria;p__Verrucomicrobiota;c__Verrucomicrobiae;o__Chthoniobacterales;f__Terrimicrobiaceae;g__;s__
b.bin.163	14_1	92.37	1.751	26334	3813455	d__Bacteria;p__Bacteroidota;c__Bacteroidia;o__Chitinophagales;f__Chitinophagaceae;g__Palsa-955;s__
b.bin.167	164_1	96.89	1.956	69627	5472891	d__Bacteria;p__Proteobacteria;c__Alphaproteobacteria;o__ATCC43930;f__Stellaceae;g__;s__
b.bin.171	34_1	97.52	1.732	19144	6170013	d__Bacteria;p__Bacteroidota;c__Bacteroidia;o__Chitinophagales;f__Chitinophagaceae;g__;s__
b.bin.172	238_1	99.44	0.854	96544	5762114	d__Bacteria;p__Acidobacteriota;c__Acidobacteriae;o__Acidobacteriales;f__Koribacteraceae;g__;s__
b.bin.174	180_1	97.44	2.38	43313	6332766	d__Bacteria;p__Verrucomicrobiota;c__Verrucomicrobiae;o__Verrucomicrobiales;f__Verrucomicrobiaceae;g__Prosthecobacter;s__
b.bin.176	42_1	91.51	2.956	14439	3561419	d__Bacteria;p__Bdellovibrionota;c__Bdellovibrionia;o__Bdellovibrionales;f__Bdellovibrionaceae;g__;s__
b.bin.178	21_1	91.17	1.108	8226	6281839	d__Bacteria;p__Bacteroidota;c__Bacteroidia;o__Chitinophagales;f__Chitinophagaceae;g__Puia;s__
b.bin.189	322_1	97.7	2.298	67836	9656775	d__Bacteria;p__Planctomycetota;c__Planctomycetes;o__Planctomycetales;f__;g__;s__
b.bin.191	293_1	92.67	4.166	33348	10273249	d__Bacteria;p__Acidobacteriota;c__Acidobacteriae;o__Bryobacterales;f__Bryobacteraceae;g__Solibacter;s__
b.bin.192	204_1	93.87	1.659	69946	5450716	d__Bacteria;p__Proteobacteria;c__Alphaproteobacteria;o__Rhizobiales;f__Xanthobacteraceae;g__BOG-931;s__
b.bin.194	175_1	95.16	3.043	33494	3196130	d__Bacteria;p__Proteobacteria;c__Alphaproteobacteria;o__Sphingomonadales;f__Sphingomonadaceae;g__Allosphingosinicella;s__
b.bin.2	150_1	97.69	2.54	44605	5400910	d__Bacteria;p__Proteobacteria;c__Alphaproteobacteria;o__Rhizobiales;f__Devosiaceae;g__Devosia_A;s__
b.bin.20	297_1	98	2.631	48361	8775085	d__Bacteria;p__Acidobacteriota;c__Acidobacteriae;o__Bryobacterales;f__Bryobacteraceae;g__;s__
b.bin.203	90_1	98.05	1.576	61273	3092241	d__Bacteria;p__Actinobacteriota;c__Actinomycetia;o__Mycobacteriales;f__SCTD01;g__;s__
b.bin.209	159_1	90.13	2.608	45125	5112949	d__Bacteria;p__Proteobacteria;c__Alphaproteobacteria;o__ATCC43930;f__Stellaceae;g__AP-15;s__
b.bin.216	8_1	97.38	1.19	36742	5437741	d__Bacteria;p__Bacteroidota;c__Bacteroidia;o__Cytophagales;f__Cyclobacteriaceae;g__;s__
b.bin.218	225_1	92.19	1.991	10105	3670779	d__Bacteria;p__Chloroflexota;c__Chloroflexia;o__Thermomicrobiales;f__;g__;s__
b.bin.22	197_1	95.54	0.836	56558	4014201	d__Bacteria;p__Proteobacteria;c__Alphaproteobacteria;o__Micropepsales;f__Micropepsaceae;g__Rhizomicrobium;s__
b.bin.225	332_1	92.34	1.724	32346	8807495	d__Bacteria;p__Planctomycetota;c__Planctomycetes;o__Pirellulales;f__Pirellulaceae;g__Pirellula;s__
b.bin.234	270_1	100	2.027	607010	3226897	d__Bacteria;p__Verrucomicrobiota;c__Verrucomicrobiae;o__Chthoniobacterales;f__UBA10450;g__AV40;s__
b.bin.236	127_1	91.88	2.35	16566	3562943	d__Bacteria;p__Acidobacteriota;c__Thermoanaerobaculia;o__UBA5066;f__Gp7-AA6;g__;s__
b.bin.239	7_1	93.4	1.098	194061	3952592	d__Bacteria;p__Gemmatimonadota;c__Gemmatimonadetes;o__Gemmatimonadales;f__GWC2-71-9;g__;s__
b.bin.243	126_1	90.9	1.6	9053	5738053	d__Bacteria;p__Planctomycetota;c__Planctomycetes;o__Planctomycetales;f__UBA10511;g__SIAF01;s__
b.bin.244	254_1	92.85	0.892	192902	3490620	d__Bacteria;p__Bdellovibrionota;c__Bdellovibrionia_A;o__UBA1018;f__UBA1018;g__JACMQW01;s__
b.bin.247	224_1	91.21	4.189	20804	6019414	d__Bacteria;p__Verrucomicrobiota;c__Verrucomicrobiae;o__Pedosphaerales;f__UBA8199;g__PSRM01;s__
b.bin.251	253_1	90.42	1.449	57560	4523696	d__Bacteria;p__Proteobacteria;c__Alphaproteobacteria;o__Micropepsales;f__Micropepsaceae;g__Rhizomicrobium;s__
b.bin.252	200_1	95.83	3.965	46512	5403059	d__Bacteria;p__Proteobacteria;c__Alphaproteobacteria;o__Sphingomonadales;f__Sphingomonadaceae;g__Sphingomonas;s__
b.bin.254	173_1	97.84	1.29	56783	7803523	d__Bacteria;p__Desulfobacterota_B;c__Binatia;o__HRBIN30;f__;g__;s__
b.bin.260	329_1	95.69	2.725	18947	7083334	d__Bacteria;p__Bacteroidota;c__Bacteroidia;o__Chitinophagales;f__Chitinophagaceae;g__Puia;s__
b.bin.267	1_1	90.63	2.536	12941	2742203	d__Bacteria;p__Proteobacteria;c__Alphaproteobacteria;o__Sphingomonadales;f__Sphingomonadaceae;g__Allosphingosinicella;s__
b.bin.27	177_1	90.78	1.754	17386	7060363	d__Bacteria;p__Acidobacteriota;c__Acidobacteriae;o__Bryobacterales;f__Bryobacteraceae;g__;s__
b.bin.270	315_1	93.51	0	149893	4971606	d__Bacteria;p__Armatimonadota;c__Abditibacteria;o__Abditibacteriales;f__Abditibacteriaceae;g__Abditibacterium;s__
b.bin.280	109_1	97.62	0.478	302444	3969543	d__Bacteria;p__Proteobacteria;c__Gammaproteobacteria;o__Pseudomonadales;f__Spongiibacteraceae;g__;s__
b.bin.283	19_1	97.29	3.378	44289	4167871	d__Bacteria;p__Verrucomicrobiota;c__Verrucomicrobiae;o__Chthoniobacterales;f__UBA10450;g__AV80;s__
b.bin.285	121_1	92.33	1.115	71599	3990513	d__Bacteria;p__Proteobacteria;c__Alphaproteobacteria;o__Micropepsales;f__Micropepsaceae;g__Rhizomicrobium;s__
b.bin.288	198_1	99.32	1.486	104074	3905212	d__Bacteria;p__Verrucomicrobiota;c__Verrucomicrobiae;o__Pedosphaerales;f__UBA11358;g__;s__
b.bin.289	334_1	90.1	2.741	50553	7018258	d__Bacteria;p__Myxococcota;c__Polyangia;o__Polyangiales;f__Polyangiaceae;g__;s__
b.bin.292	272_1	94.01	4.754	31185	5457976	d__Bacteria;p__Acidobacteriota;c__Vicinamibacteria;o__Vicinamibacterales;f__UBA2999;g__Gp6-AA40;s__
b.bin.295	245_1	93.72	1.769	24070	2603620	d__Bacteria;p__Proteobacteria;c__Alphaproteobacteria;o__Caulobacterales;f__Caulobacteraceae;g__;s__
b.bin.300	104_1	95.97	1.149	61876	7309669	d__Bacteria;p__Planctomycetota;c__Planctomycetes;o__Pirellulales;f__Pirellulaceae;g__SXOA01;s__
b.bin.302	330_1	91.31	0.663	28989	2798985	d__Bacteria;p__Proteobacteria;c__Alphaproteobacteria;o__Sphingomonadales;f__Sphingomonadaceae;g__Sphingomicrobium;s__
b.bin.307	63_1	96.62	4.646	62476	3607051	d__Bacteria;p__Verrucomicrobiota;c__Verrucomicrobiae;o__Chthoniobacterales;f__UBA10450;g__;s__
b.bin.309	131_1	92.5	3.695	14825	3660886	d__Bacteria;p__Bdellovibrionota;c__Bdellovibrionia;o__Bdellovibrionales;f__Bdellovibrionaceae;g__;s__
b.bin.310	41_1	93.39	1.111	15854	4038842	d__Bacteria;p__Bacteroidota;c__Bacteroidia;o__AKYH767;f__B-17BO;g__;s__
b.bin.312	4_1	91.24	1.001	26166	5475590	d__Bacteria;p__Bacteroidota;c__Bacteroidia;o__Chitinophagales;f__Chitinophagaceae;g__Flavisolibacter;s__
b.bin.328	192_1	91.98	4.568	29221	4598579	d__Bacteria;p__Proteobacteria;c__Gammaproteobacteria;o__Burkholderiales;f__Burkholderiaceae;g__Ramlibacter;s__
b.bin.340	306_1	90.94	4.519	8933	8443645	d__Bacteria;p__Actinobacteriota;c__Actinomycetia;o__Streptosporangiales;f__Streptosporangiaceae;g__;s__
b.bin.343	76_1	97.26	0.546	205063	3983309	d__Bacteria;p__Bacteroidota;c__Kapabacteria;o__Palsa-1295;f__Palsa-1295;g__PALSA-1295;s__
b.bin.344	113_1	94.95	2.854	16920	2525187	d__Bacteria;p__Chloroflexota;c__Ellin6529;o__QHBO01;f__QHBO01;g__CF-82;s__
b.bin.348	105_1	95.45	3.398	9612	1908634	d__Archaea;p__Thermoproteota;c__Nitrososphaeria;o__Nitrososphaerales;f__Nitrososphaeraceae;g__TA-21;s__
b.bin.351	102_1	92.36	2.564	14676	4300205	d__Bacteria;p__Acidobacteriota;c__Thermoanaerobaculia;o__Gp7-AA8;f__Gp7-AA8;g__QHVT01;s__
b.bin.352	194_1	94.81	4.664	40119	4720068	d__Bacteria;p__Proteobacteria;c__Alphaproteobacteria;o__Caulobacterales;f__Caulobacteraceae;g__;s__
b.bin.361	185_1	91.82	0.978	48140	3798619	d__Bacteria;p__Proteobacteria;c__Alphaproteobacteria;o__Micropepsales;f__Micropepsaceae;g__Rhizomicrobium;s__
b.bin.362	43_1	97.5	3.113	491244	5367315	d__Bacteria;p__Fibrobacterota;c__Fibrobacteria;o__UBA11236;f__UBA11236;g__;s__
b.bin.363	279_1	90.17	3.663	276790	7481150	d__Bacteria;p__Gemmatimonadota;c__Gemmatimonadetes;o__Gemmatimonadales;f__Gemmatimonadaceae;g__AG2;s__
b.bin.364	295_1	91.25	4.873	25511	13373065	d__Bacteria;p__Acidobacteriota;c__Acidobacteriae;o__Bryobacterales;f__Bryobacteraceae;g__PALSA-129;s__
b.bin.370	96_1	91.41	2.735	11022	4272167	d__Bacteria;p__Actinobacteriota;c__Acidimicrobiia;o__Acidimicrobiales;f__Ilumatobacteraceae;g__;s__
b.bin.374	189_1	96.82	2.085	50966	2640448	d__Bacteria;p__Proteobacteria;c__Alphaproteobacteria;o__Sphingomonadales;f__Sphingomonadaceae;g__Sphingomicrobium;s__
b.bin.382	349_1	97.38	3.418	131492	5568535	d__Bacteria;p__Acidobacteriota;c__Blastocatellia;o__Pyrinomonadales;f__Pyrinomonadaceae;g__UBA11740;s__
b.bin.385	71_1	92.53	3.334	19705	6164288	d__Bacteria;p__Proteobacteria;c__Gammaproteobacteria;o__Pseudomonadales;f__Pseudomonadaceae;g__Pseudomonas_E;s__Pseudomonas_E moorei
b.bin.394	3_1	99.04	0.476	1044097	4195511	d__Bacteria;p__Bacteroidota;c__Bacteroidia;o__AKYH767;f__B-17BO;g__;s__
b.bin.41	72_1	98.24	0.969	96754	6613648	d__Bacteria;p__Proteobacteria;c__Gammaproteobacteria;o__Pseudomonadales;f__Pseudomonadaceae;g__Pseudomonas_E;s__
b.bin.416	20_1	90.82	2.709	13218	3290073	d__Bacteria;p__Bacteroidota;c__Bacteroidia;o__Chitinophagales;f__;g__;s__
b.bin.42	286_1	96.59	0	219597	5163177	d__Bacteria;p__Planctomycetota;c__Phycisphaerae;o__Phycisphaerales;f__SM1A02;g__;s__
b.bin.45	385_1	98.31	1.709	211117	4964902	d__Bacteria;p__Acidobacteriota;c__Acidobacteriae;o__Acidobacteriales;f__Koribacteraceae;g__Sulfotelmatobacter;s__
b.bin.49	44_1	98.9	1.465	108392	5435163	d__Bacteria;p__Fibrobacterota;c__Fibrobacteria;o__UBA11236;f__UBA11236;g__;s__
b.bin.51	196_1	98.44	3.057	175233	3881588	d__Bacteria;p__Proteobacteria;c__Alphaproteobacteria;o__Micropepsales;f__Micropepsaceae;g__Rhizomicrobium;s__
b.bin.52	387_1	99.14	1.709	125613	5581789	d__Bacteria;p__Acidobacteriota;c__Acidobacteriae;o__Acidobacteriales;f__Koribacteraceae;g__JABDBE01;s__
b.bin.61	191_1	92	2.363	14144	3459890	d__Bacteria;p__Proteobacteria;c__Alphaproteobacteria;o__Acetobacterales;f__Acetobacteraceae;g__Acidocella;s__
b.bin.67	52_1	93.96	4.487	60684	7913218	d__Bacteria;p__Acidobacteriota;c__Blastocatellia;o__UBA7656;f__UBA7656;g__UBA7656;s__
b.bin.70	66_1	97.53	1.313	137411	5510561	d__Bacteria;p__Bacteroidota;c__Bacteroidia;o__Chitinophagales;f__UBA10324;g__;s__
b.bin.72	91_1	90.18	1.813	27107	3880063	d__Bacteria;p__Actinobacteriota;c__Actinomycetia;o__Propionibacteriales;f__Nocardioidaceae;g__Nocardioides;s__
b.bin.77	241_1	92.06	1.867	38731	2692157	d__Bacteria;p__Actinobacteriota;c__Thermoleophilia;o__Gaiellales;f__Gaiellaceae;g__Palsa-739;s__
b.bin.79	12_1	92.15	2.709	19547	4306736	d__Bacteria;p__Bacteroidota;c__Bacteroidia;o__Chitinophagales;f__Chitinophagaceae;g__Puia;s__
b.bin.82	389_1	93.58	1.52	30535	1867314	d__Bacteria;p__Chlamydiota;c__Chlamydiia;o__Chlamydiales;f__SM23-39;g__2-02-FULL-45-22_A;s__
b.bin.86	309_1	93.24	2.84	93205	7096941	d__Bacteria;p__Planctomycetota;c__Phycisphaerae;o__UBA1161;f__UBA1161;g__JACMJD01;s__
b.bin.90	356_1	95.72	3.513	14260	5086306	d__Bacteria;p__Acidobacteriota;c__Blastocatellia;o__Pyrinomonadales;f__Pyrinomonadaceae;g__JACMLC01;s__
b.bin.91	336_1	94.38	4.296	17060	4195672	d__Bacteria;p__Elusimicrobiota;c__Elusimicrobia;o__UBA1565;f__UBA9628;g__PALSA-1176;s__
b.bin.97	219_1	94.22	2.629	50849	5112513	d__Bacteria;p__Proteobacteria;c__Alphaproteobacteria;o__Caulobacterales;f__Hyphomonadaceae;g__;s__
c.bin.10	120_1	99.32	1.391	105986	3901646	d__Bacteria;p__Verrucomicrobiota;c__Verrucomicrobiae;o__Pedosphaerales;f__UBA11358;g__;s__
c.bin.115	116_1	93.12	3.686	26324	2192312	d__Bacteria;p__Nitrospirota;c__Nitrospiria;o__Nitrospirales;f__Nitrospiraceae;g__2-02-FULL-62-14;s__
c.bin.121	324_1	91.63	2.564	37497	5478422	d__Bacteria;p__Acidobacteriota;c__Vicinamibacteria;o__Fen-336;f__Fen-336;g__;s__
c.bin.125	17_1	98.35	1.521	15706	5552457	d__Bacteria;p__Bacteroidota;c__Bacteroidia;o__Chitinophagales;f__Chitinophagaceae;g__Flavisolibacter;s__
c.bin.133	33_2	92.32	1.477	11858	4213381	d__Bacteria;p__Bacteroidota;c__Bacteroidia;o__Chitinophagales;f__Chitinophagaceae;g__Flavisolibacter;s__
c.bin.142	123_1	90.49	3.941	19566	4386744	d__Bacteria;p__Verrucomicrobiota;c__Verrucomicrobiae;o__Chthoniobacterales;f__UBA10450;g__AV80;s__
c.bin.149	244_1	94.44	2.777	30992	3055179	d__Bacteria;p__Actinobacteriota;c__Thermoleophilia;o__Solirubrobacterales;f__Solirubrobacteraceae;g__Palsa-744;s__
c.bin.152	314_1	99.12	1.754	81226	6790805	d__Bacteria;p__Acidobacteriota;c__Acidobacteriae;o__Bryobacterales;f__Bryobacteraceae;g__QHXW01;s__
c.bin.156	339_1	95.29	1.709	14227	3458013	d__Bacteria;p__Actinobacteriota;c__UBA4738;o__UBA4738;f__UBA4738;g__;s__
c.bin.159	228_1	91.43	3.418	16553	5642080	d__Bacteria;p__Acidobacteriota;c__Thermoanaerobaculia;o__UBA5704;f__UBA5704;g__;s__
c.bin.164	142_1	93.2	4.206	59654	4105031	d__Bacteria;p__Proteobacteria;c__Gammaproteobacteria;o__Steroidobacterales;f__Steroidobacteraceae;g__;s__
c.bin.173	82_1	90.37	1.724	24441	2414618	d__Bacteria;p__Actinobacteriota;c__Thermoleophilia;o__Solirubrobacterales;f__70-9;g__;s__
c.bin.208	16_1	95.47	1.477	20763	4891813	d__Bacteria;p__Bacteroidota;c__Bacteroidia;o__Chitinophagales;f__Chitinophagaceae;g__Puia;s__
c.bin.209	147_1	99.04	2.702	35499	7346355	d__Bacteria;p__Verrucomicrobiota;c__Verrucomicrobiae;o__Pedosphaerales;f__SIBH01;g__;s__
c.bin.213	178_1	97.55	1.251	62398	2762866	d__Bacteria;p__Proteobacteria;c__Alphaproteobacteria;o__Sphingomonadales;f__Sphingomonadaceae;g__Sphingobium;s__
c.bin.217	350_1	95.39	2.564	31251	4614847	d__Bacteria;p__Acidobacteriota;c__Blastocatellia;o__Pyrinomonadales;f__Pyrinomonadaceae;g__UBA11740;s__
c.bin.22	377_2	95.72	0.854	26575	3332883	d__Bacteria;p__Acidobacteriota;c__Acidobacteriae;o__UBA7541;f__UBA7541;g__;s__
c.bin.246	168_1	93.96	2.242	22357	3839513	d__Bacteria;p__Proteobacteria;c__Alphaproteobacteria;o__Sphingomonadales;f__Sphingomonadaceae;g__Novosphingobium;s__
c.bin.249	236_1	99.22	1.298	361619	3619227	d__Bacteria;p__Proteobacteria;c__Gammaproteobacteria;o__Xanthomonadales;f__Rhodanobacteraceae;g__Dyella_A;s__
c.bin.250	337_1	90.81	2.136	14302	3210352	d__Bacteria;p__Acidobacteriota;c__Blastocatellia;o__Pyrinomonadales;f__Pyrinomonadaceae;g__OLB17;s__
c.bin.252	10_1	100	2.549	67997	5997148	d__Bacteria;p__Spirochaetota;c__Leptospirae;o__Leptospirales;f__Leptospiraceae;g__UBA2033;s__
c.bin.256	227_1	94.77	2.788	24041	7317786	d__Bacteria;p__Acidobacteriota;c__Thermoanaerobaculia;o__UBA5704;f__UBA5704;g__UBA5704;s__
c.bin.261	382_1	93.03	4.273	104386	5477982	d__Bacteria;p__Acidobacteriota;c__Acidobacteriae;o__Acidobacteriales;f__Koribacteraceae;g__;s__
c.bin.262	256_1	92.98	0.739	34904	2717917	d__Bacteria;p__Proteobacteria;c__Gammaproteobacteria;o__Xanthomonadales;f__Rhodanobacteraceae;g__66-474;s__
c.bin.269	299_1	91.55	3.296	12887	3541911	d__Bacteria;p__Gemmatimonadota;c__Gemmatimonadetes;o__Gemmatimonadales;f__GWC2-71-9;g__20CM-2-65-7;s__
c.bin.27	148_1	92.83	3.378	13761	3474646	d__Bacteria;p__Verrucomicrobiota;c__Verrucomicrobiae;o__Pedosphaerales;f__UBA11358;g__;s__
c.bin.28	61_1	91.2	2.297	65189	3183722	d__Bacteria;p__Gemmatimonadota;c__Gemmatimonadetes;o__Gemmatimonadales;f__GWC2-71-9;g__Palsa-1233;s__
c.bin.282	353_1	96.58	3.466	19891	5474401	d__Bacteria;p__Acidobacteriota;c__Blastocatellia;o__Pyrinomonadales;f__Pyrinomonadaceae;g__JACMLC01;s__
c.bin.287	156_1	91.76	1.424	42293	3456256	d__Bacteria;p__Proteobacteria;c__Alphaproteobacteria;o__Rhizobiales;f__Xanthobacteraceae;g__Pseudolabrys;s__
c.bin.288	378_1	90.74	2.407	46935	2727648	d__Bacteria;p__Armatimonadota;c__Fimbriimonadia;o__Fimbriimonadales;f__Fimbriimonadaceae;g__;s__
c.bin.289	237_1	90.08	1.098	32950	3175525	d__Bacteria;p__Gemmatimonadota;c__Gemmatimonadetes;o__Gemmatimonadales;f__GWC2-71-9;g__AG25;s__
c.bin.298	210_1	94.33	2.474	25360	5745679	d__Bacteria;p__Proteobacteria;c__Gammaproteobacteria;o__Burkholderiales;f__Burkholderiaceae;g__Rhodoferax;s__
c.bin.31	29_1	100	1.258	77286	4855532	d__Bacteria;p__Bacteroidota;c__Bacteroidia;o__Chitinophagales;f__Chitinophagaceae;g__UTBCD1;s__
c.bin.34	229_1	90.93	4.444	38577	6291748	d__Bacteria;p__Acidobacteriota;c__Vicinamibacteria;o__Fen-336;f__Fen-336;g__AA32;s__
c.bin.44	344_1	95.72	1.709	24676	4506027	d__Bacteria;p__Acidobacteriota;c__Acidobacteriae;o__UBA7541;f__UBA7541;g__Palsa-147;s__
c.bin.46	294_1	96.97	4.879	40313	10819985	d__Bacteria;p__Acidobacteriota;c__Acidobacteriae;o__Bryobacterales;f__Bryobacteraceae;g__Solibacter;s__
c.bin.53	345_1	92.3	4.558	69477	6363695	d__Bacteria;p__Acidobacteriota;c__Acidobacteriae;o__Acidobacteriales;f__Gp1-AA117;g__Gp1-AA17;s__
c.bin.58	186_1	91.99	3.695	20646	3658260	d__Bacteria;p__Proteobacteria;c__Alphaproteobacteria;o__Micropepsales;f__Micropepsaceae;g__CAIYRG01;s__
c.bin.61	278_1	93.08	4.029	42032	6849793	d__Bacteria;p__Gemmatimonadota;c__Gemmatimonadetes;o__Gemmatimonadales;f__Gemmatimonadaceae;g__AG2;s__
c.bin.62	152_1	93.48	1.424	43512	3916902	d__Bacteria;p__Proteobacteria;c__Alphaproteobacteria;o__Rhizobiales;f__Xanthobacteraceae;g__Pseudolabrys;s__
c.bin.8	390_1	95.16	0	98358	1105247	d__Bacteria;p__Proteobacteria;c__Alphaproteobacteria;o__WRAU01;f__;g__;s__
c.bin.80	100_1	93.08	4.558	72946	5915110	d__Bacteria;p__Acidobacteriota;c__Thermoanaerobaculia;o__Gp7-AA8;f__Gp7-AA8;g__;s__
c.bin.87	51_1	91.01	2.168	17086	7981808	d__Bacteria;p__Myxococcota;c__Polyangia;o__Polyangiales;f__Polyangiaceae;g__;s__
c.bin.9	209_1	97.23	2.873	125289	6340314	d__Bacteria;p__Proteobacteria;c__Gammaproteobacteria;o__Burkholderiales;f__Burkholderiaceae;g__Rhodoferax;s__
c.bin.91	351_1	94.04	3.418	106814	8322299	d__Bacteria;p__Acidobacteriota;c__Blastocatellia;o__Pyrinomonadales;f__Pyrinomonadaceae;g__;s__
d.bin.104	81_1	93.25	3.673	9749	8332635	d__Bacteria;p__Actinobacteriota;c__Actinomycetia;o__Streptosporangiales;f__Streptosporangiaceae;g__Actinocorallia;s__
d.bin.105	183_1	94.45	1.463	53554	2184563	d__Bacteria;p__Proteobacteria;c__Alphaproteobacteria;o__Micropepsales;f__Micropepsaceae;g__;s__
d.bin.107	169_1	90.24	1.182	16571	4294902	d__Bacteria;p__Proteobacteria;c__Alphaproteobacteria;o__Sphingomonadales;f__Sphingomonadaceae;g__Novosphingobium;s__
d.bin.118	391_1	96.51	0.726	57045	2294958	d__Bacteria;p__Proteobacteria;c__Gammaproteobacteria;o__Coxiellales;f__Coxiellaceae;g__;s__
d.bin.123	141_1	92.21	3.577	33612	3813791	d__Bacteria;p__Proteobacteria;c__Gammaproteobacteria;o__Burkholderiales;f__Rhodocyclaceae;g__;s__
d.bin.124	95_1	90.59	2.136	12409	4044631	d__Bacteria;p__Actinobacteriota;c__Acidimicrobiia;o__Acidimicrobiales;f__Ilumatobacteraceae;g__;s__
d.bin.137	15_1	95.32	1.258	47245	5001746	d__Bacteria;p__Bacteroidota;c__Bacteroidia;o__Chitinophagales;f__Chitinophagaceae;g__Puia;s__
d.bin.14	347_1	99.19	1.285	262704	6993104	d__Bacteria;p__Proteobacteria;c__Gammaproteobacteria;o__Burkholderiales;f__Burkholderiaceae;g__;s__
d.bin.140	291_1	90.55	3.418	33484	4925263	d__Bacteria;p__Acidobacteriota;c__Mor1;o__Mor1;f__;g__;s__
d.bin.154	98_1	99.76	3.751	97585	7833211	d__Bacteria;p__Acidobacteriota;c__Thermoanaerobaculia;o__Gp7-AA8;f__Gp7-AA8;g__;s__
d.bin.161	70_1	94.93	0.675	72655	1655289	d__Bacteria;p__Chlamydiota;c__Chlamydiia;o__Chlamydiales;f__Rhabdochlamydiaceae;g__JABDFI01;s__
d.bin.162	250_1	91.54	2.735	16022	3010695	d__Bacteria;p__Actinobacteriota;c__UBA4738;o__UBA4738;f__HRBIN12;g__;s__
d.bin.17	355_1	92.92	4.368	40022	5297196	d__Bacteria;p__Acidobacteriota;c__Blastocatellia;o__Pyrinomonadales;f__Pyrinomonadaceae;g__JACVRN01;s__
d.bin.175	181_1	96.52	3.492	89742	4381594	d__Bacteria;p__Proteobacteria;c__Alphaproteobacteria;o__Micropepsales;f__Micropepsaceae;g__CAIYRG01;s__
d.bin.187	53_1	96.53	4.273	87877	7724233	d__Bacteria;p__Acidobacteriota;c__Blastocatellia;o__UBA7656;f__UBA7656;g__UBA7656;s__
d.bin.194	69_1	95.89	0	53329	2078304	d__Bacteria;p__Proteobacteria;c__Gammaproteobacteria;o__JABCZS01;f__JABCZS01;g__;s__
d.bin.198	230_1	98.77	1.698	256031	6227903	d__Bacteria;p__Proteobacteria;c__Gammaproteobacteria;o__Burkholderiales;f__SHXO01;g__;s__
d.bin.205	251_1	92.82	1.89	18070	3230910	d__Bacteria;p__Proteobacteria;c__Alphaproteobacteria;o__Rhizobiales;f__Aestuariivirgaceae;g__CABJBCQ01;s__
d.bin.208	301_1	97.8	1.098	648288	4392013	d__Bacteria;p__Gemmatimonadota;c__Gemmatimonadetes;o__Gemmatimonadales;f__GWC2-71-9;g__;s__
d.bin.217	283_1	96.77	4.462	65856	5698666	d__Bacteria;p__Planctomycetota;c__UBA1135;o__UBA1135;f__GCA-002686595;g__;s__
d.bin.23	369_1	91.3	0.869	66071	5018857	d__Bacteria;p__Acidobacteriota;c__Acidobacteriae;o__Bryobacterales;f__Bryobacteraceae;g__Palsa-187;s__
d.bin.231	342_1	93.82	2.564	19680	2551823	d__Bacteria;p__Actinobacteriota;c__UBA4738;o__UBA4738;f__;g__;s__
d.bin.25	146_1	92.97	3.387	14073	8084917	d__Bacteria;p__Myxococcota;c__Polyangia;o__Haliangiales;f__Haliangiaceae;g__;s__
d.bin.250	9_1	100	0.492	485936	8596414	d__Bacteria;p__Bacteroidota;c__Bacteroidia;o__Chitinophagales;f__Chitinophagaceae;g__Chitinophaga;s__
d.bin.255	255_1	90.22	1.075	37986	1983680	d__Bacteria;p__Omnitrophota;c__Omnitrophia;o__Omnitrophales;f__;g__;s__
d.bin.258	273_1	92.54	4.741	21975	8542426	d__Bacteria;p__Myxococcota;c__Polyangia;o__Polyangiales;f__Polyangiaceae;g__;s__
d.bin.27	133_1	93.64	4.054	13400	2938172	d__Bacteria;p__Verrucomicrobiota;c__Verrucomicrobiae;o__Chthoniobacterales;f__;g__;s__
d.bin.273	248_1	96.59	2.479	24311	5457961	d__Bacteria;p__Planctomycetota;c__UBA1135;o__UBA2386;f__UBA2386;g__;s__
d.bin.288	118_1	97.97	0	148883	4856306	d__Bacteria;p__Verrucomicrobiota;c__Verrucomicrobiae;o__Pedosphaerales;f__SIBH01;g__;s__
d.bin.295	56_1	100	0.617	250028	5345381	d__Bacteria;p__Proteobacteria;c__Gammaproteobacteria;o__Enterobacterales;f__DSM-103792;g__;s__
d.bin.299	281_1	91.39	3.942	34465	4934051	d__Bacteria;p__Planctomycetota;c__UBA1135;o__UBA1135;f__GCA-002686595;g__;s__
d.bin.302	46_1	99.02	1.098	159915	3137634	d__Bacteria;p__FCPU426;c__Palsa-1180;o__Palsa-1180;f__Palsa-1180;g__PALSA-1180;s__
d.bin.303	108_1	92.36	3.693	23954	3392470	d__Bacteria;p__Nitrospirota;c__Nitrospiria;o__Nitrospirales;f__Nitrospiraceae;g__Palsa-1315;s__
d.bin.318	246_1	90.69	3.418	70534	6599986	d__Bacteria;p__Acidobacteriota;c__Vicinamibacteria;o__Vicinamibacterales;f__UBA2999;g__Gp6-AA40;s__
d.bin.321	276_1	93.37	1.052	15527	3914416	d__Bacteria;p__Acidobacteriota;c__Holophagae;o__Holophagales;f__Holophagaceae;g__;s__
d.bin.322	149_1	99.32	3.378	243383	7832364	d__Bacteria;p__Verrucomicrobiota;c__Verrucomicrobiae;o__Chthoniobacterales;f__Chthoniobacteraceae;g__VFJQ01;s__
d.bin.327	201_1	91.48	3.773	13000	6381375	d__Bacteria;p__Proteobacteria;c__Alphaproteobacteria;o__Rhizobiales;f__Rhizobiaceae;g__Neorhizobium;s__
d.bin.331	55_1	91.57	4.326	10701	7061452	d__Bacteria;p__Acidobacteriota;c__Blastocatellia;o__Pyrinomonadales;f__Pyrinomonadaceae;g__PSRF01;s__
d.bin.332	83_1	96.03	1.724	70999	2565314	d__Bacteria;p__Actinobacteriota;c__Thermoleophilia;o__Solirubrobacterales;f__70-9;g__;s__
d.bin.333	367_1	97	0.434	112361	6788257	d__Bacteria;p__Acidobacteriota;c__Acidobacteriae;o__Bryobacterales;f__Bryobacteraceae;g__Palsa-187;s__
d.bin.34	25_1	96.55	0.766	24392	3927510	d__Bacteria;p__Bacteroidota;c__Bacteroidia;o__Chitinophagales;f__Chitinophagaceae;g__;s__
d.bin.346	284_1	97.8	1.163	26051	3367458	d__Bacteria;p__Gemmatimonadota;c__Gemmatimonadetes;o__Gemmatimonadales;f__GWC2-71-9;g__JABFSM01;s__
d.bin.350	138_1	93.54	2.053	82002	3483579	d__Bacteria;p__Proteobacteria;c__Gammaproteobacteria;o__Steroidobacterales;f__Steroidobacteraceae;g__FEN-1191;s__
d.bin.354	88_1	93.9	3.661	13023	2801259	d__Bacteria;p__Actinobacteriota;c__Actinomycetia;o__Actinomycetales;f__Microbacteriaceae;g__Lysinimonas_A;s__
d.bin.355	97_1	95.5	1.123	339109	2496947	d__Bacteria;p__Elusimicrobiota;c__Elusimicrobia;o__2-01-FULL-59-12;f__;g__;s__
d.bin.356	65_1	98.52	0.164	243241	5422925	d__Bacteria;p__Bacteroidota;c__Bacteroidia;o__Chitinophagales;f__UBA10324;g__;s__
d.bin.36	302_1	90.1	3.846	27662	3261606	d__Bacteria;p__Gemmatimonadota;c__Gemmatimonadetes;o__Gemmatimonadales;f__GWC2-71-9;g__;s__
d.bin.363	60_1	95.66	1.934	28360	6724811	d__Bacteria;p__Bacteroidota;c__Bacteroidia;o__Cytophagales;f__Cyclobacteriaceae;g__Chryseolinea_A;s__
d.bin.367	57_1	96.57	3.845	21962	9213810	d__Bacteria;p__Bacteroidota;c__Bacteroidia;o__Chitinophagales;f__Chitinophagaceae;g__Paraflavitalea;s__
d.bin.375	300_1	92.66	1.648	100294	3443665	d__Bacteria;p__Gemmatimonadota;c__Gemmatimonadetes;o__Gemmatimonadales;f__GWC2-71-9;g__20CM-2-65-7;s__
d.bin.383	217_1	90.8	4.838	25336	3376367	d__Bacteria;p__Proteobacteria;c__Gammaproteobacteria;o__Burkholderiales;f__SG8-39;g__;s__
d.bin.389	321_1	99.14	0.854	64718	5666974	d__Bacteria;p__Actinobacteriota;c__UBA4738;o__;f__;g__;s__
d.bin.395	368_1	94.14	2.463	36755	7544148	d__Bacteria;p__Acidobacteriota;c__Acidobacteriae;o__Bryobacterales;f__Bryobacteraceae;g__Palsa-187;s__
d.bin.396	32_1	94.95	1.149	22964	4651838	d__Bacteria;p__Bacteroidota;c__Bacteroidia;o__Chitinophagales;f__Chitinophagaceae;g__UTBCD1;s__
d.bin.41	68_1	98.09	0.181	631051	5401601	d__Bacteria;p__Chloroflexota;c__Anaerolineae;o__Anaerolineales;f__EnvOPS12;g__OLB14;s__
d.bin.47	145_1	98.9	3.396	53370	5818617	d__Bacteria;p__Gemmatimonadota;c__Gemmatimonadetes;o__Gemmatimonadales;f__Gemmatimonadaceae;g__AG2;s__
d.bin.51	36_1	97.76	1.537	32429	4544601	d__Bacteria;p__Bacteroidota;c__Bacteroidia;o__Cytophagales;f__Cyclobacteriaceae;g__ELB16-189;s__
d.bin.68	215_1	96.36	0.938	39042	3674411	d__Bacteria;p__Proteobacteria;c__Gammaproteobacteria;o__Burkholderiales;f__SG8-39;g__;s__
d.bin.69	212_1	95.03	1.395	22512	3801423	d__Bacteria;p__Proteobacteria;c__Gammaproteobacteria;o__Burkholderiales;f__Burkholderiaceae;g__Ramlibacter;s__
d.bin.70	323_1	93.48	2.354	15967	8474136	d__Bacteria;p__Actinobacteriota;c__Actinomycetia;o__Streptomycetales;f__Streptomycetaceae;g__Streptacidiphilus;s__Streptacidiphilus jeojiense
d.bin.8	139_1	96.33	0.362	130357	2394532	d__Bacteria;p__Proteobacteria;c__Gammaproteobacteria;o__Steroidobacterales;f__Steroidobacteraceae;g__FEN-1191;s__
d.bin.80	137_1	95.2	2.054	85095	4161317	d__Bacteria;p__Verrucomicrobiota;c__Verrucomicrobiae;o__Opitutales;f__Opitutaceae;g__CAIYFD01;s__
d.bin.86	158_1	92.73	1.265	21563	4506303	d__Bacteria;p__Proteobacteria;c__Alphaproteobacteria;o__Rhizobiales;f__Xanthobacteraceae;g__Pseudolabrys;s__
d.bin.89	58_1	99.4	0.297	216992	4457748	d__Bacteria;p__Bacteroidota;c__Bacteroidia;o__Cytophagales;f__Cyclobacteriaceae;g__ELB16-189;s__
e.bin.111	88_2	94.02	1.368	18263	2678917	d__Bacteria;p__Actinobacteriota;c__Actinomycetia;o__Actinomycetales;f__Microbacteriaceae;g__Lysinimonas_A;s__
e.bin.114	371_1	96.15	2.841	12111	5832741	d__Bacteria;p__Bacteroidota;c__Kapabacteria;o__OLB7;f__OLB7;g__;s__
e.bin.116	207_1	95.8	4.359	65109	4909354	d__Bacteria;p__Proteobacteria;c__Gammaproteobacteria;o__Steroidobacterales;f__Steroidobacteraceae;g__Bog-1198;s__
e.bin.122	213_1	93.73	2.854	31643	4759416	d__Bacteria;p__Proteobacteria;c__Gammaproteobacteria;o__Burkholderiales;f__Burkholderiaceae;g__Ramlibacter;s__
e.bin.135	258_1	94.27	1.476	76096	3564397	d__Bacteria;p__Proteobacteria;c__Gammaproteobacteria;o__Xanthomonadales;f__Rhodanobacteraceae;g__;s__
e.bin.147	282_1	92.04	2.944	9147	6442473	d__Bacteria;p__Planctomycetota;c__UBA1135;o__UBA1135;f__GCA-002686595;g__;s__
e.bin.149	346_1	92.23	1.709	16941	5344331	d__Bacteria;p__Acidobacteriota;c__Acidobacteriae;o__Acidobacteriales;f__Gp1-AA117;g__Gp1-AA17;s__
e.bin.150	28_1	96.34	2.233	16770	6479546	d__Bacteria;p__Bacteroidota;c__Bacteroidia;o__Chitinophagales;f__Chitinophagaceae;g__Puia;s__
e.bin.166	359_1	95.24	2.564	31400	7260704	d__Bacteria;p__Acidobacteriota;c__Blastocatellia;o__Pyrinomonadales;f__Pyrinomonadaceae;g__UBA11741;s__
e.bin.168	151_1	95.09	1.27	65624	4163288	d__Bacteria;p__Proteobacteria;c__Alphaproteobacteria;o__Rhizobiales;f__Devosiaceae;g__Devosia_A;s__
e.bin.174	380_1	96.17	2.732	125132	3536075	d__Bacteria;p__Bacteroidota;c__UBA10030;o__UBA10030;f__SZUA-254;g__;s__
e.bin.176	266_1	93.57	2.077	18809	3837007	d__Bacteria;p__Proteobacteria;c__Gammaproteobacteria;o__Burkholderiales;f__Casimicrobiaceae;g__VBCG01;s__
e.bin.180	319_1	95.77	0	102415	2244071	d__Bacteria;p__Actinobacteriota;c__Actinomycetia;o__Actinomycetales;f__Microbacteriaceae;g__Cryobacterium_B;s__
e.bin.182	221_1	90.59	2.922	10433	3664753	d__Bacteria;p__Proteobacteria;c__Alphaproteobacteria;o__Caulobacterales;f__Hyphomonadaceae;g__;s__
e.bin.190	13_1	97.53	0.027	356311	3956315	d__Bacteria;p__Bacteroidota;c__Bacteroidia;o__Chitinophagales;f__Chitinophagaceae;g__JJ008;s__
e.bin.192	6_1	97.14	0	256371	3908528	d__Bacteria;p__Bacteroidota;c__Bacteroidia;o__NS11-12g;f__UBA955;g__;s__
e.bin.2	304_1	92.3	3.361	24817	3914405	d__Bacteria;p__Gemmatimonadota;c__Gemmatimonadetes;o__Gemmatimonadales;f__GWC2-71-9;g__;s__
e.bin.208	335_1	92.69	1.801	10111	6638272	d__Bacteria;p__Verrucomicrobiota;c__Verrucomicrobiae;o__Pedosphaerales;f__SIBH01;g__;s__
e.bin.215	160_1	94.93	1.996	10864	4333227	d__Bacteria;p__Proteobacteria;c__Alphaproteobacteria;o__ATCC43930;f__Stellaceae;g__AP-15;s__
e.bin.221	166_1	94.67	2.324	13618	4518047	d__Bacteria;p__Planctomycetota;c__Phycisphaerae;o__UBA1845;f__UTPLA1;g__;s__
e.bin.226	199_1	95.86	0.869	38686	3417580	d__Bacteria;p__Proteobacteria;c__Alphaproteobacteria;o__Micropepsales;f__Micropepsaceae;g__Rhizomicrobium;s__
e.bin.233	290_1	94.01	3.573	19521	3761920	d__Bacteria;p__Acidobacteriota;c__Mor1;o__Mor1;f__;g__;s__
e.bin.240	376_1	94.2	2.735	35465	5327843	d__Bacteria;p__Acidobacteriota;c__Acidobacteriae;o__UBA7541;f__UBA7541;g__UBA7541;s__
e.bin.243	374_1	95.72	1.709	377649	4950129	d__Bacteria;p__Acidobacteriota;c__Acidobacteriae;o__UBA7541;f__UBA7541;g__UBA7541;s__
e.bin.250	163_1	94.22	1.112	66238	3112086	d__Bacteria;p__Proteobacteria;c__Alphaproteobacteria;o__Rhizobiales;f__Methylopilaceae;g__Ga0077545;s__
e.bin.253	370_1	95.72	0.854	221106	4159488	d__Bacteria;p__Acidobacteriota;c__Acidobacteriae;o__UBA7541;f__UBA7541;g__;s__
e.bin.26	239_1	92.13	3.418	11129	3443817	d__Bacteria;p__Acidobacteriota;c__Acidobacteriae;o__Acidobacteriales;f__Gp1-AA112;g__DSPA01;s__
e.bin.27	341_1	91.42	4.273	11156	4580792	d__Bacteria;p__Acidobacteriota;c__Thermoanaerobaculia;o__UBA5066;f__Gp7-AA6;g__;s__
e.bin.270	259_1	95.43	3.624	29993	4292104	d__Bacteria;p__Proteobacteria;c__Gammaproteobacteria;o__Xanthomonadales;f__Rhodanobacteraceae;g__;s__
e.bin.28	226_1	97.38	3.044	90225	9269108	d__Bacteria;p__Acidobacteriota;c__Thermoanaerobaculia;o__UBA5704;f__UBA5704;g__UBA5704;s__
e.bin.283	11_1	96.79	1.33	16453	4803673	d__Bacteria;p__Bacteroidota;c__Bacteroidia;o__Chitinophagales;f__Chitinophagaceae;g__Puia;s__
e.bin.288	89_1	98.07	1.346	69084	3446793	d__Bacteria;p__Actinobacteriota;c__Actinomycetia;o__Actinomycetales;f__Microbacteriaceae;g__Protaetiibacter;s__
e.bin.289	234_1	90.59	3.76	42929	6847700	d__Bacteria;p__Acidobacteriota;c__Vicinamibacteria;o__Vicinamibacterales;f__UBA2999;g__2-02-FULL-65-29;s__
e.bin.295	373_1	91.17	1.709	193543	4964497	d__Bacteria;p__Acidobacteriota;c__Acidobacteriae;o__UBA7541;f__UBA7541;g__UBA7541;s__
e.bin.296	27_1	98.85	1.724	167248	6504218	d__Bacteria;p__Bacteroidota;c__Bacteroidia;o__Chitinophagales;f__Chitinophagaceae;g__Puia;s__
e.bin.303	162_1	94.88	2.741	21321	5067153	d__Bacteria;p__Proteobacteria;c__Alphaproteobacteria;o__Rhizobiales;f__Xanthobacteraceae;g__Bradyrhizobium;s__
e.bin.31	22_1	96.39	2.769	22183	8443007	d__Bacteria;p__Bacteroidota;c__Bacteroidia;o__Chitinophagales;f__Chitinophagaceae;g__Puia;s__
e.bin.329	252_1	95.4	1.163	35496	3579369	d__Bacteria;p__Gemmatimonadota;c__Gemmatimonadetes;o__Gemmatimonadales;f__GWC2-71-9;g__;s__
e.bin.34	383_1	95.67	3.49	24750	5248938	d__Bacteria;p__Acidobacteriota;c__Acidobacteriae;o__Acidobacteriales;f__Koribacteraceae;g__Gp1-AA145;s__
e.bin.43	360_1	96.52	2.782	242848	5532716	d__Bacteria;p__Acidobacteriota;c__Blastocatellia;o__Pyrinomonadales;f__Pyrinomonadaceae;g__UBA11741;s__
e.bin.44	240_1	95.67	1.709	29820	4187205	d__Bacteria;p__Acidobacteriota;c__Acidobacteriae;o__Acidobacteriales;f__Koribacteraceae;g__JABCZH01;s__
e.bin.45	375_1	95.72	1.709	297068	5466553	d__Bacteria;p__Acidobacteriota;c__Acidobacteriae;o__UBA7541;f__UBA7541;g__UBA7541;s__
e.bin.46	388_1	97.29	4.093	27927	6517322	d__Bacteria;p__Verrucomicrobiota;c__Verrucomicrobiae;o__Pedosphaerales;f__SIBH01;g__;s__
e.bin.49	179_1	95.87	2.035	23443	3785837	d__Bacteria;p__Proteobacteria;c__Alphaproteobacteria;o__Rhizobiales;f__Aestuariivirgaceae;g__CABJBCQ01;s__
e.bin.5	277_1	91	3.644	22495	4028889	d__Bacteria;p__Gemmatimonadota;c__Gemmatimonadetes;o__Gemmatimonadales;f__GWC2-71-9;g__SHZT01;s__
e.bin.52	101_1	91.81	4.273	18508	6223727	d__Bacteria;p__Acidobacteriota;c__Thermoanaerobaculia;o__Gp7-AA8;f__Gp7-AA8;g__QHVT01;s__
e.bin.53	214_1	90.7	3.345	18166	3262693	d__Bacteria;p__Proteobacteria;c__Gammaproteobacteria;o__Burkholderiales;f__SG8-39;g__SCGC-AG-212-J23;s__
e.bin.57	74_1	90.82	1.335	10804	4628996	d__Bacteria;p__Acidobacteriota;c__Acidobacteriae;o__Acidobacteriales;f__Koribacteraceae;g__;s__
e.bin.63	195_1	93.76	2.218	106331	4063364	d__Bacteria;p__Proteobacteria;c__Alphaproteobacteria;o__Caulobacterales;f__Caulobacteraceae;g__Phenylobacterium;s__
e.bin.64	45_1	93.51	1.111	68770	8508268	d__Bacteria;p__Armatimonadota;c__SYMT01;o__SYMT01;f__SYMT01;g__;s__
e.bin.65	35_1	91.77	2.722	11188	5760626	d__Bacteria;p__Bacteroidota;c__Bacteroidia;o__Chitinophagales;f__Chitinophagaceae;g__46-32;s__
e.bin.72	261_1	98.3	4.708	89269	5177855	d__Bacteria;p__Proteobacteria;c__Gammaproteobacteria;o__Xanthomonadales;f__Rhodanobacteraceae;g__Dokdonella_A;s__
e.bin.96	307_1	95.29	2.38	29514	3904802	d__Bacteria;p__Gemmatimonadota;c__Gemmatimonadetes;o__Gemmatimonadales;f__Gemmatimonadaceae;g__UBA4720;s__
f.bin.107	358_1	95.72	2.564	107879	7057650	d__Bacteria;p__Acidobacteriota;c__Acidobacteriae;o__Acidobacteriales;f__Gp1-AA117;g__Gp1-AA17;s__
f.bin.111	242_1	95.05	3.944	79982	2778042	d__Bacteria;p__Proteobacteria;c__Alphaproteobacteria;o__Rhizobiales;f__Xanthobacteraceae;g__Bradyrhizobium;s__
f.bin.115	268_1	94.87	2.803	40665	6399400	d__Bacteria;p__Verrucomicrobiota;c__Verrucomicrobiae;o__Pedosphaerales;f__UBA11358;g__;s__
f.bin.118	107_1	91.81	4.09	33872	3454293	d__Bacteria;p__Proteobacteria;c__Alphaproteobacteria;o__Rhizobiales;f__Xanthobacteraceae;g__Pseudolabrys;s__
f.bin.119	5_1	94.35	1.008	12979	2531893	d__Bacteria;p__Proteobacteria;c__Alphaproteobacteria;o__Sphingomonadales;f__Sphingomonadaceae;g__Novosphingobium;s__
f.bin.133	77_1	90.94	4.488	10079	8818009	d__Bacteria;p__Acidobacteriota;c__Thermoanaerobaculia;o__Gp7-AA8;f__Gp7-AA8;g__;s__
f.bin.136	202_1	97.85	0.158	129705	6026703	d__Bacteria;p__Proteobacteria;c__Alphaproteobacteria;o__Dongiales;f__Dongiaceae;g__Hypericibacter;s__Hypericibacter terrae
f.bin.141	326_1	95.6	1.098	159765	2902332	d__Bacteria;p__Acidobacteriota;c__Blastocatellia;o__Pyrinomonadales;f__Pyrinomonadaceae;g__;s__
f.bin.142	193_1	95.85	2.563	30754	2746526	d__Bacteria;p__Acidobacteriota;c__Vicinamibacteria;o__Vicinamibacterales;f__2-12-FULL-66-21;g__;s__
f.bin.147	211_1	91.08	3.076	16068	5553382	d__Bacteria;p__Proteobacteria;c__Alphaproteobacteria;o__Rhizobiales;f__Xanthobacteraceae;g__Pseudolabrys;s__
f.bin.151	317_1	95.92	2.991	40844	4745810	d__Bacteria;p__Eisenbacteria;c__RBG-16-71-46;o__RBG-16-71-46;f__RBG-16-71-46;g__WS-3;s__
f.bin.16	288_1	97.72	1.136	410700	4025254	d__Bacteria;p__Proteobacteria;c__Gammaproteobacteria;o__Burkholderiales;f__SG8-40;g__;s__
f.bin.160	392_1	93.56	2.325	142664	2591425	d__Bacteria;p__Acidobacteriota;c__Blastocatellia;o__Pyrinomonadales;f__Pyrinomonadaceae;g__;s__
f.bin.163	327_1	100	1.098	533726	3062508	d__Bacteria;p__Proteobacteria;c__Gammaproteobacteria;o__Steroidobacterales;f__Steroidobacteraceae;g__;s__
f.bin.18	220_1	95.23	1.195	56093	3373857	d__Bacteria;p__Proteobacteria;c__Gammaproteobacteria;o__Burkholderiales;f__Burkholderiaceae;g__Mitsuaria;s__
f.bin.186	54_1	97.43	3.418	64863	7408251	d__Bacteria;p__Nitrospirota;c__Nitrospiria;o__Nitrospirales;f__Nitrospiraceae;g__Palsa-1315;s__
f.bin.203	275_1	90.1	3.296	9203	4706030	d__Bacteria;p__Gemmatimonadota;c__Gemmatimonadetes;o__Gemmatimonadales;f__Gemmatimonadaceae;g__AG2;s__
f.bin.212	110_1	97.46	4.322	249648	5255320	d__Bacteria;p__Actinobacteriota;c__Acidimicrobiia;o__Acidimicrobiales;f__JACDCH01;g__;s__
f.bin.215	280_1	92.64	4.761	41182	6896315	d__Bacteria;p__Gemmatimonadota;c__Gemmatimonadetes;o__Gemmatimonadales;f__GWC2-71-9;g__Palsa-1233;s__
f.bin.227	287_1	94.44	2.564	170109	6034247	d__Bacteria;p__Acidobacteriota;c__Vicinamibacteria;o__Vicinamibacterales;f__UBA2999;g__Gp6-AA40;s__
f.bin.230	377_1	92.85	4.284	11243	3437300	d__Bacteria;p__Proteobacteria;c__Alphaproteobacteria;o__Rhizobiales;f__Xanthobacteraceae;g__Bradyrhizobium;s__
f.bin.234	289_1	97.72	1.136	84764	4648483	d__Bacteria;p__Planctomycetota;c__UBA1135;o__UBA1135;f__GCA-002686595;g__;s__
f.bin.245	103_1	90.59	4.77	23448	3852137	d__Bacteria;p__Acidobacteriota;c__Vicinamibacteria;o__Vicinamibacterales;f__UBA2999;g__Gp6-AA45;s__
f.bin.251	267_1	96.31	0.76	33526	5304908	d__Bacteria;p__Acidobacteriota;c__Acidobacteriae;o__Bryobacterales;f__Bryobacteraceae;g__Solibacter;s__
f.bin.252	85_1	91.63	3.304	22530	2494311	d__Bacteria;p__Patescibacteria;c__Paceibacteria;o__UBA9983_A;f__UBA2163;g__C7867-001;s__
f.bin.260	271_1	90.46	4.055	11447	6114474	d__Bacteria;p__Acidobacteriota;c__Thermoanaerobaculia;o__Gp7-AA8;f__Gp7-AA8;g__;s__
f.bin.263	352_1	90.51	4.7	20002	5689754	d__Bacteria;p__Proteobacteria;c__Alphaproteobacteria;o__Caulobacterales;f__Hyphomonadaceae;g__VFBF01;s__
f.bin.264	170_1	92.43	0.663	9364	2476943	d__Bacteria;p__Bacteroidota;c__Bacteroidia;o__Cytophagales;f__Cyclobacteriaceae;g__Chryseolinea;s__Chryseolinea serpens
f.bin.266	64_1	99.06	0.738	121489	5742047	d__Bacteria;p__Proteobacteria;c__Gammaproteobacteria;o__DSM-16500;f__DSM-16500;g__JABDBV01;s__
f.bin.267	48_1	97.22	0	76154	3521037	d__Bacteria;p__Eisenbacteria;c__RBG-16-71-46;o__SZUA-252;f__SZUA-252;g__WS-9;s__
f.bin.269	386_1	98.9	1.709	210381	6493633	d__Bacteria;p__Proteobacteria;c__Alphaproteobacteria;o__Caulobacterales;f__Caulobacteraceae;g__NCED01;s__
f.bin.27	80_1	90.68	2.747	18615	3168700	d__Bacteria;p__Proteobacteria;c__Gammaproteobacteria;o__Steroidobacterales;f__Steroidobacteraceae;g__;s__
f.bin.272	143_1	95.29	0.854	25278	4303051	d__Bacteria;p__Planctomycetota;c__Phycisphaerae;o__Phycisphaerales;f__SM1A02;g__;s__
f.bin.298	171_1	92.38	0.452	28102	3719411	d__Bacteria;p__Patescibacteria;c__Paceibacteria;o__UBA9983_A;f__UBA6065;g__UBA6065;s__
f.bin.299	47_1	92.8	1.893	29421	6374356	d__Bacteria;p__Proteobacteria;c__Alphaproteobacteria;o__Caulobacterales;f__Hyphomonadaceae;g__;s__
f.bin.3	205_1	90.58	1.962	11482	2684361	d__Bacteria;p__Proteobacteria;c__Gammaproteobacteria;o__Steroidobacterales;f__Steroidobacteraceae;g__;s__
f.bin.303	216_1	92.57	3.386	16320	3703830	d__Bacteria;p__Proteobacteria;c__Alphaproteobacteria;o__Micavibrionales;f__Micavibrionaceae;g__;s__
f.bin.308	318_1	91.28	0.917	168646	2782782	d__Bacteria;p__Actinobacteriota;c__Acidimicrobiia;o__Acidimicrobiales;f__AC-14;g__CADDZP01;s__
f.bin.329	292_1	94.87	4.444	105556	4355151	d__Bacteria;p__Acidobacteriota;c__Vicinamibacteria;o__Fen-336;f__Fen-336;g__;s__
f.bin.333	86_1	95.64	0.862	82272	2616747	d__Bacteria;p__Actinobacteriota;c__Actinomycetia;o__Mycobacteriales;f__Frankiaceae;g__;s__
f.bin.334	372_1	98.95	1.566	40924	3685803	d__Bacteria;p__Actinobacteriota;c__Acidimicrobiia;o__Acidimicrobiales;f__Ilumatobacteraceae;g__;s__
f.bin.350	208_1	99.37	1.845	104577	5853521	d__Bacteria;p__Eisenbacteria;c__RBG-16-71-46;o__SZUA-252;f__SZUA-252;g__WS-9;s__
f.bin.49	135_1	98.37	4.054	127389	6123622	d__Bacteria;p__Proteobacteria;c__Gammaproteobacteria;o__SLND01;f__;g__;s__
f.bin.65	23_1	99.26	1.001	209443	7761346	d__Bacteria;p__Acidobacteriota;c__Blastocatellia;o__UBA7656;f__UBA7656;g__;s__
f.bin.68	203_1	96.29	1.65	55316	5472781	d__Bacteria;p__Verrucomicrobiota;c__Verrucomicrobiae;o__Chthoniobacterales;f__UBA10450;g__;s__
f.bin.8	222_1	96.21	4.454	22653	4662542	d__Bacteria;p__Actinobacteriota;c__Thermoleophilia;o__Solirubrobacterales;f__70-9;g__;s__
f.bin.9	331_1	91.88	1.724	31479	5906560	d__Bacteria;p__Gemmatimonadota;c__Gemmatimonadetes;o__Gemmatimonadales;f__Gemmatimonadaceae;g__UBA4720;s__
f.bin.91	361_1	98.9	1.098	72522	3138159	d__Bacteria;p__Methylomirabilota;c__Methylomirabilia;o__Rokubacteriales;f__GWA2-73-35;g__AR5;s__

## Sheet: a-BjSa_G210
bin	completeness	contamination	N50	size	classification
a.bin.308	100	2.732	130464	3218083	d__Bacteria;p__Verrucomicrobiota;c__Verrucomicrobiae;o__Chthoniobacterales;f__UBA10450;g__AV40;s__
a.bin.49	100	2.364	161307	3145014	d__Bacteria;p__Verrucomicrobiota;c__Verrucomicrobiae;o__Chthoniobacterales;f__UBA10450;g__Palsa-1382;s__
a.bin.250	100	5.236	359942	6520856	d__Bacteria;p__Verrucomicrobiota;c__Verrucomicrobiae;o__Pedosphaerales;f__Palsa-1400;g__;s__
a.bin.239	99.93	0	147068	7524546	d__Bacteria;p__Planctomycetota;c__Planctomycetes;o__Pirellulales;f__UBA1268;g__;s__
a.bin.272	99.56	0.184	188421	2984898	d__Bacteria;p__Proteobacteria;c__Alphaproteobacteria;o__Micropepsales;f__Micropepsaceae;g__Rhizomicrobium;s__
a.bin.384	99.56	2.702	64221	5286369	d__Bacteria;p__Verrucomicrobiota;c__Verrucomicrobiae;o__Pedosphaerales;f__UBA3939;g__UBA3939;s__
a.bin.294	99.32	2.641	82134	6943654	d__Bacteria;p__Verrucomicrobiota;c__Verrucomicrobiae;o__Chthoniobacterales;f__Chthoniobacteraceae;g__;s__
a.bin.297	99.26	1.505	176111	7180952	d__Bacteria;p__Bacteroidota;c__Bacteroidia;o__Chitinophagales;f__Chitinophagaceae;g__Puia;s__
a.bin.69	99.09	1.709	399842	5465215	d__Bacteria;p__Acidobacteriota;c__Acidobacteriae;o__Acidobacteriales;f__Koribacteraceae;g__QIAJ01;s__
a.bin.395	99.04	0.476	606535	4178022	d__Bacteria;p__Bacteroidota;c__Bacteroidia;o__AKYH767;f__B-17BO;g__;s__
a.bin.80	98.97	3.418	315101	8090598	d__Bacteria;p__Acidobacteriota;c__Acidobacteriae;o__Acidobacteriales;f__Koribacteraceae;g__Sulfotelmatobacter;s__
a.bin.270	98.95	0.777	61647	6415540	d__Bacteria;p__Proteobacteria;c__Alphaproteobacteria;o__Acetobacterales;f__Acetobacteraceae;g__Palsa-883;s__
a.bin.100	98.9	1.098	24839	2918785	d__Bacteria;p__Eisenbacteria;c__RBG-16-71-46;o__SZUA-252;f__SZUA-252;g__WS-7;s__
a.bin.127	98.87	2.115	204768	3665423	d__Bacteria;p__Proteobacteria;c__Alphaproteobacteria;o__Micropepsales;f__Micropepsaceae;g__Rhizomicrobium;s__
a.bin.354	98.85	1.724	235253	6471563	d__Bacteria;p__Bacteroidota;c__Bacteroidia;o__Chitinophagales;f__Chitinophagaceae;g__Puia;s__
a.bin.13	98.85	0	45001	7224690	d__Bacteria;p__Planctomycetota;c__Planctomycetes;o__Pirellulales;f__Pirellulaceae;g__;s__
a.bin.340	98.64	0.015	104903	5715181	d__Bacteria;p__Proteobacteria;c__Alphaproteobacteria;o__Sphingomonadales;f__Sphingomonadaceae;g__Rhizorhabdus;s__
a.bin.433	98.64	5.878	76067	8264344	d__Bacteria;p__Verrucomicrobiota;c__Verrucomicrobiae;o__Pedosphaerales;f__SIBH01;g__;s__
a.bin.347	98.54	4.995	106808	6813945	d__Bacteria;p__Verrucomicrobiota;c__Verrucomicrobiae;o__Opitutales;f__Opitutaceae;g__ER46;s__
a.bin.37	98.46	2.672	120056	4387501	d__Bacteria;p__Proteobacteria;c__Gammaproteobacteria;o__Xanthomonadales;f__Rhodanobacteraceae;g__Dokdonella_A;s__
a.bin.319	98.29	4.32	119868	5492639	d__Bacteria;p__Acidobacteriota;c__Blastocatellia;o__Pyrinomonadales;f__Pyrinomonadaceae;g__JACVRN01;s__
a.bin.23	98.29	5.982	174912	8132148	d__Bacteria;p__Acidobacteriota;c__Blastocatellia;o__UBA7656;f__UBA7656;g__;s__
a.bin.406	98.27	6.034	23336	4940972	d__Bacteria;p__Bacteroidota;c__Bacteroidia;o__Chitinophagales;f__Chitinophagaceae;g__Puia;s__
a.bin.48	98.26	1.709	187382	4866215	d__Bacteria;p__Acidobacteriota;c__Acidobacteriae;o__Acidobacteriales;f__Koribacteraceae;g__Sulfotelmatobacter;s__
a.bin.247	98.24	1.754	386390	6398579	d__Bacteria;p__Acidobacteriota;c__Acidobacteriae;o__Bryobacterales;f__Bryobacteraceae;g__QHXW01;s__
a.bin.216	98.24	3.118	78220	10371737	d__Bacteria;p__Acidobacteriota;c__Acidobacteriae;o__Bryobacterales;f__Bryobacteraceae;g__Solibacter;s__
a.bin.329	98.07	2.564	189191	6932970	d__Bacteria;p__Acidobacteriota;c__Blastocatellia;o__Pyrinomonadales;f__Pyrinomonadaceae;g__UBA11740;s__
a.bin.41	98.05	0.649	65542	3737253	d__Bacteria;p__Proteobacteria;c__Alphaproteobacteria;o__Caulobacterales;f__Hyphomonadaceae;g__;s__
a.bin.59	97.97	4.729	74402	3648966	d__Bacteria;p__Verrucomicrobiota;c__Verrucomicrobiae;o__Chthoniobacterales;f__UBA10450;g__AV80;s__
a.bin.72	97.85	2.564	62979	6928983	d__Bacteria;p__Acidobacteriota;c__Thermoanaerobaculia;o__Gp7-AA8;f__Gp7-AA8;g__;s__
a.bin.419	97.8	2.197	130028	5138122	d__Bacteria;p__Gemmatimonadota;c__Gemmatimonadetes;o__Gemmatimonadales;f__Gemmatimonadaceae;g__;s__
a.bin.387	97.7	4.665	29013	10713699	d__Bacteria;p__Planctomycetota;c__Planctomycetes;o__Pirellulales;f__PNKZ01;g__;s__
a.bin.130	97.7	6.964	18762	9655905	d__Bacteria;p__Planctomycetota;c__Planctomycetes;o__Planctomycetales;f__UBA10511;g__;s__
a.bin.181	97.43	2.516	22198	4757324	d__Bacteria;p__Actinobacteriota;c__Acidimicrobiia;o__Acidimicrobiales;f__Ilumatobacteraceae;g__;s__
a.bin.252	97.26	0.546	205030	3982094	d__Bacteria;p__Bacteroidota;c__Kapabacteria;o__Palsa-1295;f__Palsa-1295;g__PALSA-1295;s__
a.bin.143	97.23	2.899	46507	3668515	d__Bacteria;p__Proteobacteria;c__Gammaproteobacteria;o__Xanthomonadales;f__Xanthomonadaceae;g__;s__
a.bin.129	97.14	0	138403	3885218	d__Bacteria;p__Bacteroidota;c__Bacteroidia;o__NS11-12g;f__UBA955;g__;s__
a.bin.431	97.14	0.333	130069	5142056	d__Bacteria;p__Bacteroidota;c__Bacteroidia;o__Sphingobacteriales;f__Sphingobacteriaceae;g__Mucilaginibacter;s__
a.bin.160	97.06	1.132	204801	3747856	d__Bacteria;p__Proteobacteria;c__Gammaproteobacteria;o__Nevskiales;f__Nevskiaceae;g__;s__
a.bin.67	97.04	1.724	68599	2601415	d__Bacteria;p__Actinobacteriota;c__Thermoleophilia;o__Solirubrobacterales;f__70-9;g__;s__
a.bin.200	96.92	3.07	344995	11480903	d__Bacteria;p__Acidobacteriota;c__Acidobacteriae;o__Bryobacterales;f__Bryobacteraceae;g__PALSA-129;s__
a.bin.140	96.91	0.985	24966	4845261	d__Bacteria;p__Bacteroidota;c__Bacteroidia;o__Chitinophagales;f__Chitinophagaceae;g__UTBCD1;s__
a.bin.96	96.89	4.534	27823	4030550	d__Bacteria;p__Proteobacteria;c__Gammaproteobacteria;o__Xanthomonadales;f__Rhodanobacteraceae;g__;s__
a.bin.256	96.86	0.854	141661	5006298	d__Bacteria;p__Acidobacteriota;c__Acidobacteriae;o__Acidobacteriales;f__Koribacteraceae;g__JABDBE01;s__
a.bin.204	96.83	2.97	64340	5356041	d__Bacteria;p__Proteobacteria;c__Alphaproteobacteria;o__Sphingomonadales;f__Sphingomonadaceae;g__Sphingomonas;s__
a.bin.5	96.78	3.409	64037	8250864	d__Bacteria;p__Planctomycetota;c__Phycisphaerae;o__UBA1161;f__UBA1161;g__;s__
a.bin.38	96.73	0.337	149520	3095226	d__Bacteria;p__Verrucomicrobiota;c__Verrucomicrobiae;o__Chthoniobacterales;f__UBA10450;g__;s__
a.bin.154	96.63	5.128	55350	7696135	d__Bacteria;p__Gemmatimonadota;c__Gemmatimonadetes;o__Gemmatimonadales;f__Gemmatimonadaceae;g__AG2;s__
a.bin.46	96.62	1.684	17483	3750904	d__Bacteria;p__Verrucomicrobiota;c__Verrucomicrobiae;o__Pedosphaerales;f__UBA11358;g__;s__
a.bin.321	96.58	2.564	432345	5108464	d__Bacteria;p__Acidobacteriota;c__Acidobacteriae;o__UBA7541;f__UBA7541;g__Palsa-147;s__
a.bin.190	96.58	4.444	58653	7696484	d__Bacteria;p__Acidobacteriota;c__Blastocatellia;o__Pyrinomonadales;f__Pyrinomonadaceae;g__;s__
a.bin.359	96.58	5.128	61360	6717814	d__Bacteria;p__Acidobacteriota;c__Blastocatellia;o__Pyrinomonadales;f__Pyrinomonadaceae;g__UBA11740;s__
a.bin.119	96.58	4.925	19456	4904992	d__Bacteria;p__Acidobacteriota;c__Thermoanaerobaculia;o__UBA5066;f__Gp7-AA6;g__;s__
a.bin.70	96.48	0	66851	6497697	d__Bacteria;p__Planctomycetota;c__Planctomycetes;o__Pirellulales;f__Ga0077529;g__;s__
a.bin.14	96.43	2.717	57393	4128155	d__Bacteria;p__Proteobacteria;c__Gammaproteobacteria;o__Steroidobacterales;f__Steroidobacteraceae;g__CAILZL01;s__
a.bin.337	96.26	3.513	25538	3175867	d__Bacteria;p__Verrucomicrobiota;c__Verrucomicrobiae;o__Chthoniobacterales;f__UBA10450;g__;s__
a.bin.151	96.18	1.282	119842	3146754	d__Bacteria;p__Gemmatimonadota;c__Gemmatimonadetes;o__Gemmatimonadales;f__GWC2-71-9;g__AG25;s__
a.bin.345	96.16	1.379	76822	8997255	d__Bacteria;p__Planctomycetota;c__Planctomycetes;o__Planctomycetales;f__UBA10511;g__SIAF01;s__
a.bin.249	96.1	1.267	42453	3347445	d__Bacteria;p__Proteobacteria;c__Alphaproteobacteria;o__Caulobacterales;f__Hyphomonadaceae;g__Terricaulis;s__
a.bin.276	96.05	9.107	11348	9809039	d__Bacteria;p__Desulfobacterota_B;c__Binatia;o__UBA9968;f__UBA9968;g__DP-20;s__
a.bin.147	96.03	1.709	246201	5799330	d__Bacteria;p__Acidobacteriota;c__Acidobacteriae;o__Acidobacteriales;f__Koribacteraceae;g__Sulfotelmatobacter;s__
a.bin.32	96.03	4.121	242545	5188948	d__Bacteria;p__Proteobacteria;c__Gammaproteobacteria;o__Steroidobacterales;f__Steroidobacteraceae;g__;s__
a.bin.303	96.02	1.33	14491	5559971	d__Bacteria;p__Bacteroidota;c__Bacteroidia;o__Chitinophagales;f__Chitinophagaceae;g__Parafilimonas;s__
a.bin.207	95.96	2.096	27231	4831139	d__Bacteria;p__Bacteroidota;c__Bacteroidia;o__Chitinophagales;f__LD1;g__UBA1941;s__
a.bin.22	95.94	2.742	45058	3972772	d__Bacteria;p__Verrucomicrobiota;c__Verrucomicrobiae;o__Chthoniobacterales;f__UBA10450;g__AV80;s__
a.bin.215	95.91	5.495	46086	4975103	d__Bacteria;p__Proteobacteria;c__Gammaproteobacteria;o__Steroidobacterales;f__Steroidobacteraceae;g__;s__
a.bin.232	95.87	1.55	31533	4169865	d__Bacteria;p__Proteobacteria;c__Alphaproteobacteria;o__Micropepsales;f__Micropepsaceae;g__CAIYRG01;s__
a.bin.64	95.72	5.982	80221	7281502	d__Bacteria;p__Acidobacteriota;c__Blastocatellia;o__UBA7656;f__UBA7656;g__;s__
a.bin.368	95.6	2.197	8455	3655490	d__Bacteria;p__Gemmatimonadota;c__Gemmatimonadetes;o__Gemmatimonadales;f__GWC2-71-9;g__;s__
a.bin.123	95.6	4.522	41503	6583146	d__Bacteria;p__Proteobacteria;c__Alphaproteobacteria;o__Rhizobiales;f__Xanthobacteraceae;g__P52-10;s__
a.bin.291	95.6	9.594	25111	6311053	d__Bacteria;p__Verrucomicrobiota;c__Verrucomicrobiae;o__Chthoniobacterales;f__;g__;s__
a.bin.27	95.51	4.273	86255	8054002	d__Bacteria;p__Acidobacteriota;c__Blastocatellia;o__Pyrinomonadales;f__Pyrinomonadaceae;g__;s__
a.bin.235	95.41	1.743	76194	6579656	d__Bacteria;p__Chloroflexota;c__Chloroflexia;o__54-19;f__;g__;s__
a.bin.166	95.38	0.956	19465	3110924	d__Bacteria;p__Proteobacteria;c__Alphaproteobacteria;o__Sphingomonadales;f__Sphingomonadaceae;g__Allosphingosinicella;s__
a.bin.383	95.37	0	11459	2712782	d__Bacteria;p__Eremiobacterota;c__Eremiobacteria;o__Baltobacterales;f__Baltobacteraceae;g__Cybelea;s__
a.bin.348	94.87	3.418	151853	5903855	d__Bacteria;p__Acidobacteriota;c__Blastocatellia;o__Pyrinomonadales;f__Pyrinomonadaceae;g__OLB17;s__
a.bin.284	94.85	2.153	56172	3243326	d__Bacteria;p__Proteobacteria;c__Alphaproteobacteria;o__Sphingomonadales;f__Sphingomonadaceae;g__Sphingomicrobium;s__
a.bin.255	94.82	1.954	14928	2866371	d__Bacteria;p__Eremiobacterota;c__Eremiobacteria;o__Baltobacterales;f__Baltobacteraceae;g__Tumulicola;s__
a.bin.322	94.71	2.557	37478	4814636	d__Bacteria;p__Chloroflexota;c__Ktedonobacteria;o__Ktedonobacterales;f__;g__;s__
a.bin.213	94.68	2.463	39794	3998441	d__Bacteria;p__Proteobacteria;c__Alphaproteobacteria;o__Rhizobiales;f__Xanthobacteraceae;g__Pseudolabrys;s__
a.bin.238	94.59	0.758	51937	2965173	d__Bacteria;p__Proteobacteria;c__Alphaproteobacteria;o__Sphingomonadales;f__Sphingomonadaceae;g__Sphingomicrobium;s__
a.bin.194	94.57	2.726	24712	4502794	d__Bacteria;p__Proteobacteria;c__Gammaproteobacteria;o__Xanthomonadales;f__Ahniellaceae;g__;s__
a.bin.224	94.52	0.442	46581	2624991	d__Bacteria;p__Proteobacteria;c__Alphaproteobacteria;o__Sphingomonadales;f__Sphingomonadaceae;g__Sphingomicrobium;s__
a.bin.413	94.22	1.293	30622	3488667	d__Bacteria;p__Actinobacteriota;c__Thermoleophilia;o__Solirubrobacterales;f__Thermoleophilaceae;g__;s__
a.bin.138	94.18	2.504	9512	4522502	d__Bacteria;p__Bacteroidota;c__Bacteroidia;o__Chitinophagales;f__Chitinophagaceae;g__Flavisolibacter;s__
a.bin.202	94.18	4.395	21718	5388252	d__Bacteria;p__Gemmatimonadota;c__Gemmatimonadetes;o__Gemmatimonadales;f__Gemmatimonadaceae;g__AG2;s__
a.bin.298	94.12	1.917	18429	2522330	d__Bacteria;p__Proteobacteria;c__Alphaproteobacteria;o__Sphingomonadales;f__Sphingomonadaceae;g__Sphingomicrobium;s__
a.bin.24	94.11	4.369	59492	4986930	d__Bacteria;p__Desulfobacterota_B;c__Binatia;o__UBA9968;f__UBA9968;g__2-12-FULL-60-19;s__
a.bin.139	94.08	1.171	55261	3293985	d__Bacteria;p__Actinobacteriota;c__Actinomycetia;o__Mycobacteriales;f__;g__;s__
a.bin.360	94.03	1.111	10806	5513776	d__Bacteria;p__Proteobacteria;c__Gammaproteobacteria;o__Burkholderiales;f__Burkholderiaceae;g__Variovorax;s__
a.bin.153	94	1.6	20938	2392096	d__Archaea;p__Thermoplasmatota;c__SW-10-69-26;o__;f__;g__;s__
a.bin.257	93.96	2.272	27175	2595808	d__Bacteria;p__Proteobacteria;c__Alphaproteobacteria;o__Caulobacterales;f__Caulobacteraceae;g__NCED01;s__
a.bin.113	93.9	3.248	25913	6848212	d__Bacteria;p__Myxococcota;c__Polyangia;o__Polyangiales;f__Polyangiaceae;g__;s__
a.bin.135	93.74	7.657	11881	4923147	d__Bacteria;p__Firmicutes;c__Bacilli;o__Bacillales_B;f__DSM-18226;g__Neobacillus;s__
a.bin.390	93.72	3.08	10832	3228252	d__Bacteria;p__Verrucomicrobiota;c__Verrucomicrobiae;o__Chthoniobacterales;f__UBA10450;g__Palsa-1392;s__
a.bin.196	93.68	9.783	7173	2171952	d__Archaea;p__Thermoproteota;c__Nitrososphaeria;o__Nitrososphaerales;f__Nitrososphaeraceae;g__TA-21;s__
a.bin.128	93.51	0	110890	4974967	d__Bacteria;p__Armatimonadota;c__Abditibacteria;o__Abditibacteriales;f__Abditibacteriaceae;g__Abditibacterium;s__
a.bin.131	93.5	3.296	101759	3806455	d__Bacteria;p__Gemmatimonadota;c__Gemmatimonadetes;o__Gemmatimonadales;f__Gemmatimonadaceae;g__UBA4720;s__
a.bin.296	93.5	4.395	60586	3954023	d__Bacteria;p__Gemmatimonadota;c__Gemmatimonadetes;o__Longimicrobiales;f__RSA9;g__;s__
a.bin.10	93.46	4.788	20444	2947053	d__Bacteria;p__Verrucomicrobiota;c__Verrucomicrobiae;o__Chthoniobacterales;f__UBA10450;g__;s__
a.bin.243	93.34	3.164	55340	5813174	d__Bacteria;p__Proteobacteria;c__Alphaproteobacteria;o__Rhizobiales;f__Labraceae;g__Labrys;s__
a.bin.228	93.3	0.94	52640	3157805	d__Bacteria;p__Actinobacteriota;c__Thermoleophilia;o__Solirubrobacterales;f__Solirubrobacteraceae;g__Palsa-744;s__
a.bin.1	93.09	2.564	113160	5045970	d__Bacteria;p__Acidobacteriota;c__Blastocatellia;o__Pyrinomonadales;f__Pyrinomonadaceae;g__OLB17;s__
a.bin.16	93.07	1.173	20870	3435483	d__Bacteria;p__Proteobacteria;c__Alphaproteobacteria;o__Sphingomonadales;f__Sphingomonadaceae;g__Allosphingosinicella;s__
a.bin.159	93.05	0.925	410051	4685930	d__Bacteria;p__Armatimonadota;c__Fimbriimonadia;o__Fimbriimonadales;f__Fimbriimonadaceae;g__;s__
a.bin.374	92.95	2.183	36290	4086793	d__Bacteria;p__Proteobacteria;c__Alphaproteobacteria;o__Rhizobiales;f__Xanthobacteraceae;g__Pseudolabrys;s__
a.bin.144	92.94	3.466	10443	7469449	d__Bacteria;p__Acidobacteriota;c__Blastocatellia;o__UBA7656;f__UBA7656;g__;s__
a.bin.367	92.59	8.457	25982	4272936	d__Bacteria;p__Acidobacteriota;c__Acidobacteriae;o__UBA7541;f__UBA7541;g__;s__
a.bin.227	92.56	8.783	18537	5865260	d__Bacteria;p__Verrucomicrobiota;c__Verrucomicrobiae;o__Chthoniobacterales;f__;g__;s__
a.bin.356	92.47	0.358	150879	2222977	d__Bacteria;p__Omnitrophota;c__Koll11;o__2-02-FULL-51-18;f__2-02-FULL-51-18;g__;s__
a.bin.389	92.43	3.162	11502	2852263	d__Bacteria;p__Actinobacteriota;c__Acidimicrobiia;o__IMCC26256;f__PALSA-555;g__;s__
a.bin.372	92.3	7.264	140018	8197812	d__Bacteria;p__Acidobacteriota;c__Acidobacteriae;o__20CM-2-55-15;f__20CM-2-55-15;g__20CM-2-55-15;s__
a.bin.274	92.22	5.743	16693	7459635	d__Bacteria;p__Verrucomicrobiota;c__Verrucomicrobiae;o__Pedosphaerales;f__SIBE01;g__;s__
a.bin.210	92.2	4.368	17772	5115405	d__Bacteria;p__Acidobacteriota;c__Acidobacteriae;o__Acidobacteriales;f__Koribacteraceae;g__;s__
a.bin.214	92.2	4.464	7938	3194234	d__Bacteria;p__Bdellovibrionota;c__Bdellovibrionia;o__Bdellovibrionales;f__Bdellovibrionaceae;g__;s__
a.bin.244	92.18	1.851	11445	2063628	d__Bacteria;p__Chloroflexota;c__Ellin6529;o__QHBO01;f__QHBO01;g__CF-167;s__
a.bin.426	92.15	3.846	23837	3865239	d__Bacteria;p__Actinobacteriota;c__Acidimicrobiia;o__IMCC26256;f__IMCC26256;g__;s__
a.bin.350	92.12	0.925	273972	3559552	d__Bacteria;p__Armatimonadota;c__Fimbriimonadia;o__Fimbriimonadales;f__Fimbriimonadaceae;g__;s__
a.bin.402	92.05	2.003	11637	5868705	d__Bacteria;p__Actinobacteriota;c__Actinomycetia;o__Mycobacteriales;f__Frankiaceae;g__;s__
a.bin.259	91.93	3.589	29604	7093634	d__Bacteria;p__Acidobacteriota;c__Vicinamibacteria;o__Vicinamibacterales;f__UBA2999;g__;s__
a.bin.58	91.9	2.197	17408	2888233	d__Bacteria;p__Gemmatimonadota;c__Gemmatimonadetes;o__Gemmatimonadales;f__GWC2-71-9;g__Palsa-1233;s__
a.bin.112	91.78	1.994	11403	3843992	d__Bacteria;p__Acidobacteriota;c__Thermoanaerobaculia;o__UBA5066;f__Gp7-AA6;g__;s__
a.bin.39	91.69	1.739	44724	3609940	d__Bacteria;p__Proteobacteria;c__Alphaproteobacteria;o__Micropepsales;f__Micropepsaceae;g__CAIYRG01;s__
a.bin.93	91.55	7.742	34895	7587259	d__Bacteria;p__Verrucomicrobiota;c__Verrucomicrobiae;o__Pedosphaerales;f__UBA8199;g__;s__
a.bin.306	91.5	2.735	30637	4806644	d__Bacteria;p__Acidobacteriota;c__Acidobacteriae;o__UBA7541;f__UBA7541;g__UBA7541;s__
a.bin.420	91.49	1.937	49896	3525202	d__Bacteria;p__Proteobacteria;c__Gammaproteobacteria;o__DSM-16500;f__DSM-16500;g__Aquicella_A;s__
a.bin.3	91.36	3.659	47255	3847237	d__Bacteria;p__Proteobacteria;c__Gammaproteobacteria;o__Steroidobacterales;f__Steroidobacteraceae;g__13-2-20CM-66-19;s__
a.bin.126	91.29	4.782	7156	2959228	d__Bacteria;p__Acidobacteriota;c__Acidobacteriae;o__UBA7541;f__UBA7541;g__;s__
a.bin.11	91.26	2.641	12480	2870928	d__Bacteria;p__Actinobacteriota;c__UBA4738;o__UBA4738;f__HRBIN12;g__;s__
a.bin.99	91.2	1.098	14434	3272151	d__Bacteria;p__Gemmatimonadota;c__Gemmatimonadetes;o__Gemmatimonadales;f__GWC2-71-9;g__;s__
a.bin.172	91.19	9.639	6733	6105458	d__Bacteria;p__Gemmatimonadota;c__Gemmatimonadetes;o__Gemmatimonadales;f__GWC2-71-9;g__;s__
a.bin.125	91.17	2.631	16619	10445391	d__Bacteria;p__Acidobacteriota;c__Acidobacteriae;o__Bryobacterales;f__Bryobacteraceae;g__;s__
a.bin.362	91.15	2.236	34962	2042356	d__Bacteria;p__Proteobacteria;c__Alphaproteobacteria;o__Micropepsales;f__Micropepsaceae;g__;s__
a.bin.98	91.12	0.658	21182	2662966	d__Bacteria;p__Proteobacteria;c__Gammaproteobacteria;o__Xanthomonadales;f__Rhodanobacteraceae;g__66-474;s__
a.bin.9	91.07	3.713	18752	4607697	d__Bacteria;p__Proteobacteria;c__Gammaproteobacteria;o__Steroidobacterales;f__Steroidobacteraceae;g__CADEED01;s__
a.bin.71	91.02	2.123	12124	4528738	d__Bacteria;p__Acidobacteriota;c__Thermoanaerobaculia;o__UBA5066;f__Gp7-AA6;g__;s__
a.bin.432	91.01	6.837	12066	7186245	d__Bacteria;p__Acidobacteriota;c__Acidobacteriae;o__Acidobacteriales;f__Koribacteraceae;g__Sulfotelmatobacter;s__
a.bin.90	91	1.107	28626	3615451	d__Bacteria;p__Proteobacteria;c__Alphaproteobacteria;o__Rhizobiales;f__Xanthobacteraceae;g__Pseudolabrys;s__
a.bin.219	90.99	6.018	9774	3739686	d__Bacteria;p__Actinobacteriota;c__Actinomycetia;o__Propionibacteriales;f__Nocardioidaceae;g__Nocardioides;s__
a.bin.251	90.92	1.88	23174	4555444	d__Bacteria;p__Acidobacteriota;c__Acidobacteriae;o__Acidobacteriales;f__Koribacteraceae;g__Gp1-AA145;s__
a.bin.208	90.78	3.144	12420	7188641	d__Bacteria;p__Acidobacteriota;c__Thermoanaerobaculia;o__Gp7-AA8;f__Gp7-AA8;g__;s__
a.bin.344	90.75	4.077	10717	3678860	d__Bacteria;p__Proteobacteria;c__Gammaproteobacteria;o__Xanthomonadales;f__Rhodanobacteraceae;g__;s__
a.bin.163	90.74	0.791	74776	3851396	d__Bacteria;p__Proteobacteria;c__Alphaproteobacteria;o__Rhizobiales;f__Xanthobacteraceae;g__Pseudolabrys;s__
a.bin.366	90.61	1.178	19939	3099132	d__Bacteria;p__Proteobacteria;c__Gammaproteobacteria;o__Burkholderiales;f__Casimicrobiaceae;g__VBCG01;s__
a.bin.242	90.59	5.584	30453	6327438	d__Bacteria;p__Acidobacteriota;c__Vicinamibacteria;o__Fen-336;f__Fen-336;g__AA32;s__
a.bin.268	90.55	1.754	17163	7346997	d__Bacteria;p__Acidobacteriota;c__Acidobacteriae;o__Bryobacterales;f__Bryobacteraceae;g__Bog-375;s__
a.bin.21	90.53	3.579	8724	6792717	d__Bacteria;p__Planctomycetota;c__MHYJ01;o__MHYJ01;f__;g__;s__
a.bin.369	90.51	9.467	7357	7252814	d__Bacteria;p__Methylomirabilota;c__Methylomirabilia;o__Rokubacteriales;f__GWA2-73-35;g__AR5;s__
a.bin.370	90.46	2.58	26873	7309718	d__Bacteria;p__Desulfobacterota_B;c__Binatia;o__HRBIN30;f__CADEER01;g__;s__
a.bin.168	90.39	2.36	25626	4427218	d__Bacteria;p__Proteobacteria;c__Alphaproteobacteria;o__Sphingomonadales;f__Sphingomonadaceae;g__Novosphingobium;s__
a.bin.55	90.26	2.805	21349	6857046	d__Bacteria;p__Chloroflexota;c__UBA6077;o__UBA6077;f__CF-72;g__CF-72;s__
a.bin.57	90.25	6.561	7924	3921665	d__Bacteria;p__Proteobacteria;c__Alphaproteobacteria;o__Rhizobiales;f__Aestuariivirgaceae;g__CABJBCQ01;s__
a.bin.221	90.2	1.97	6962	3755355	d__Bacteria;p__Bacteroidota;c__Bacteroidia;o__Chitinophagales;f__Chitinophagaceae;g__Flavisolibacter;s__
a.bin.203	90.15	4.844	10346	2865513	d__Bacteria;p__Proteobacteria;c__Gammaproteobacteria;o__DSM-16500;f__DSM-16500;g__;s__
a.bin.231	90.1	0.549	19514	3753410	d__Bacteria;p__Eisenbacteria;c__RBG-16-71-46;o__RBG-16-71-46;f__RBG-16-71-46;g__WS-3;s__
a.bin.73	90.02	2.394	12168	2400240	d__Bacteria;p__Verrucomicrobiota;c__Verrucomicrobiae;o__Chthoniobacterales;f__UBA10450;g__;s__
a.bin.282	89.94	2.155	28185	2500025	d__Bacteria;p__Actinobacteriota;c__Thermoleophilia;o__Gaiellales;f__Gaiellaceae;g__Palsa-739;s__
a.bin.212	89.73	1.231	9659	4519291	d__Bacteria;p__Bacteroidota;c__Bacteroidia;o__Chitinophagales;f__Chitinophagaceae;g__Puia;s__
a.bin.83	89.64	1.098	14167	4592868	d__Bacteria;p__Fibrobacterota;c__Fibrobacteria;o__UBA11236;f__UBA11236;g__;s__
a.bin.7	89.62	0.854	39938	5381382	d__Bacteria;p__Acidobacteriota;c__Acidobacteriae;o__Acidobacteriales;f__Koribacteraceae;g__Sulfotelmatobacter;s__
a.bin.331	89.56	1.316	15702	6459713	d__Bacteria;p__Armatimonadota;c__Chthonomonadetes;o__Chthonomonadales;f__Chthonomonadaceae;g__;s__
a.bin.110	89.52	3.608	6743	4218996	d__Bacteria;p__Acidobacteriota;c__Acidobacteriae;o__Acidobacteriales;f__Koribacteraceae;g__;s__
a.bin.234	89.41	3.396	7217	3412587	d__Bacteria;p__Gemmatimonadota;c__Gemmatimonadetes;o__Longimicrobiales;f__UBA6960;g__UBA2988;s__
a.bin.275	89.3	5.23	12027	6981909	d__Bacteria;p__Myxococcota;c__Polyangia;o__Palsa-1104;f__Palsa-1104;g__;s__
a.bin.103	89.29	2.391	13105	4719784	d__Bacteria;p__Proteobacteria;c__Gammaproteobacteria;o__Burkholderiales;f__Burkholderiaceae;g__Caballeronia;s__
a.bin.364	89.12	5.519	9840	6297686	d__Bacteria;p__Acidobacteriota;c__Blastocatellia;o__UBA7656;f__;g__;s__
a.bin.186	89	6.018	20342	3090726	d__Bacteria;p__Chloroflexota;c__Ellin6529;o__CSP1-4;f__CSP1-4;g__Palsa-1033;s__
a.bin.114	88.95	9.349	8834	7747664	d__Bacteria;p__Proteobacteria;c__Alphaproteobacteria;o__Acetobacterales;f__Acetobacteraceae;g__;s__
a.bin.314	88.9	3.977	12967	10613434	d__Bacteria;p__Planctomycetota;c__Planctomycetes;o__Gemmatales;f__Gemmataceae;g__Gemmata;s__
a.bin.187	88.81	2.564	18867	8852646	d__Bacteria;p__Acidobacteriota;c__Thermoanaerobaculia;o__UBA5704;f__UBA5704;g__;s__
a.bin.12	88.8	3.418	36434	5546230	d__Bacteria;p__Acidobacteriota;c__Vicinamibacteria;o__Vicinamibacterales;f__UBA2999;g__Gp6-AA40;s__
a.bin.286	88.66	3.248	15290	8357756	d__Bacteria;p__Myxococcota;c__Polyangia;o__Polyangiales;f__Polyangiaceae;g__;s__
a.bin.397	88.64	1.388	9078	7073336	d__Bacteria;p__Armatimonadota;c__Abditibacteria;o__Abditibacteriales;f__Abditibacteriaceae;g__;s__
a.bin.301	88.63	4.601	18088	4000382	d__Bacteria;p__Proteobacteria;c__Gammaproteobacteria;o__Xanthomonadales;f__Rhodanobacteraceae;g__Dokdonella_A;s__
a.bin.35	88.3	2.991	16490	4131791	d__Bacteria;p__Acidobacteriota;c__Acidobacteriae;o__UBA7541;f__UBA7541;g__UBA7541;s__
a.bin.248	88.25	2.926	16377	3981129	d__Bacteria;p__Acidobacteriota;c__Acidobacteriae;o__UBA7541;f__UBA7541;g__UBA7541;s__
a.bin.43	88.16	7.224	12998	7560115	d__Bacteria;p__Bacteroidota;c__Bacteroidia;o__Chitinophagales;f__Chitinophagaceae;g__Puia;s__
a.bin.134	88.11	2.297	18611	2958484	d__Bacteria;p__Gemmatimonadota;c__Gemmatimonadetes;o__Gemmatimonadales;f__GWC2-71-9;g__Palsa-1233;s__
a.bin.278	88.08	3.851	10548	6377505	d__Bacteria;p__Verrucomicrobiota;c__Verrucomicrobiae;o__Pedosphaerales;f__UBA8199;g__PSRM01;s__
a.bin.34	88.03	3.846	13338	5611341	d__Bacteria;p__Acidobacteriota;c__Blastocatellia;o__UBA7656;f__UBA7656;g__;s__
a.bin.174	87.94	3.063	7501	8375055	d__Bacteria;p__Actinobacteriota;c__Actinomycetia;o__Streptosporangiales;f__Streptosporangiaceae;g__Palsa-504;s__
a.bin.145	87.93	1.74	14537	4767138	d__Bacteria;p__Bacteroidota;c__Bacteroidia;o__Chitinophagales;f__Chitinophagaceae;g__Puia;s__
a.bin.62	87.88	2.838	20905	5840244	d__Bacteria;p__Proteobacteria;c__Alphaproteobacteria;o__Dongiales;f__Dongiaceae;g__Dongia;s__
a.bin.86	87.82	0.854	28239	4023897	d__Bacteria;p__Acidobacteriota;c__Acidobacteriae;o__UBA7541;f__UBA7541;g__Palsa-295;s__
a.bin.423	87.63	4.331	7527	5369043	d__Bacteria;p__Verrucomicrobiota;c__Verrucomicrobiae;o__Pedosphaerales;f__UBA3939;g__UBA3939;s__
a.bin.381	87.53	8.341	8684	4288124	d__Bacteria;p__Gemmatimonadota;c__Gemmatimonadetes;o__Gemmatimonadales;f__Gemmatimonadaceae;g__AG2;s__
a.bin.40	87.42	3.773	12027	3365725	d__Bacteria;p__Chloroflexota;c__Chloroflexia;o__Thermomicrobiales;f__;g__;s__
a.bin.87	87.36	5.784	9053	6222993	d__Bacteria;p__Proteobacteria;c__Gammaproteobacteria;o__Burkholderiales;f__Burkholderiaceae;g__Variovorax;s__
a.bin.316	87.28	3.846	8601	3839468	d__Bacteria;p__Acidobacteriota;c__Acidobacteriae;o__Acidobacteriales;f__Gp1-AA117;g__Gp1-AA17;s__
a.bin.375	87.26	2.136	30121	5251133	d__Bacteria;p__Acidobacteriota;c__Acidobacteriae;o__Acidobacteriales;f__Koribacteraceae;g__;s__
a.bin.230	87.26	3.378	22009	4769080	d__Bacteria;p__Verrucomicrobiota;c__Verrucomicrobiae;o__Chthoniobacterales;f__Terrimicrobiaceae;g__;s__
a.bin.31	87.25	1.416	16035	2408501	d__Bacteria;p__Actinobacteriota;c__Thermoleophilia;o__Solirubrobacterales;f__70-9;g__SHVA01;s__
a.bin.287	87.2	1.536	11668	3986220	d__Bacteria;p__Proteobacteria;c__Alphaproteobacteria;o__ATCC43930;f__Stellaceae;g__AP-15;s__
a.bin.351	87.13	3.296	15275	3158144	d__Bacteria;p__Gemmatimonadota;c__Gemmatimonadetes;o__Gemmatimonadales;f__GWC2-71-9;g__;s__
a.bin.332	87.01	8.524	9934	4573556	d__Bacteria;p__Proteobacteria;c__Alphaproteobacteria;o__Rhizobiales;f__Devosiaceae;g__Devosia_A;s__
a.bin.118	86.91	4.188	16642	8134528	d__Bacteria;p__Acidobacteriota;c__Blastocatellia;o__UBA7656;f__UBA7656;g__UBA7656;s__
a.bin.193	86.91	0	30131	636751	d__Bacteria;p__Patescibacteria;c__Paceibacteria;o__UBA9983_A;f__Zambryskibacteraceae;g__C7867-006;s__
a.bin.15	86.73	2.298	10161	7851650	d__Bacteria;p__Planctomycetota;c__Planctomycetes;o__Planctomycetales;f__;g__;s__
a.bin.104	86.62	2.979	24856	3743143	d__Bacteria;p__Actinobacteriota;c__Actinomycetia;o__Propionibacteriales;f__Nocardioidaceae;g__Nocardioides;s__
a.bin.333	86.56	2.557	6939	3517839	d__Bacteria;p__Chloroflexota;c__Dehalococcoidia;o__UBA2991;f__UBA2991;g__PNKC01;s__
a.bin.430	86.52	3.716	17969	2574153	d__Bacteria;p__Verrucomicrobiota;c__Verrucomicrobiae;o__Chthoniobacterales;f__UBA10450;g__;s__
a.bin.142	86.51	1.123	17220	1032904	d__Bacteria;p__Dependentiae;c__Babeliae;o__Babeliales;f__;g__;s__
a.bin.188	86.44	5.299	13361	3514698	d__Bacteria;p__Acidobacteriota;c__Vicinamibacteria;o__Vicinamibacterales;f__UBA2999;g__2-02-FULL-65-29;s__
a.bin.121	86.4	9.649	15054	8607564	d__Bacteria;p__Acidobacteriota;c__Acidobacteriae;o__Bryobacterales;f__Bryobacteraceae;g__;s__
a.bin.20	86.25	6.41	23590	4655016	d__Bacteria;p__Actinobacteriota;c__Acidimicrobiia;o__Acidimicrobiales;f__AC-14;g__CADDZP01;s__
a.bin.267	86.23	2.197	40724	4507689	d__Bacteria;p__Gemmatimonadota;c__Gemmatimonadetes;o__Gemmatimonadales;f__GWC2-71-9;g__JABFSM01;s__
a.bin.75	86.13	0.434	20324	1897229	d__Bacteria;p__Proteobacteria;c__Alphaproteobacteria;o__Micropepsales;f__Micropepsaceae;g__;s__
a.bin.229	85.97	0.568	15859	4375790	d__Bacteria;p__Planctomycetota;c__Phycisphaerae;o__Phycisphaerales;f__SM1A02;g__;s__
a.bin.394	85.85	7.764	11195	8495709	d__Bacteria;p__Myxococcota;c__Polyangia;o__Polyangiales;f__Sandaracinaceae;g__;s__
a.bin.401	85.85	7.24	17285	5011573	d__Bacteria;p__Proteobacteria;c__Alphaproteobacteria;o__Sphingomonadales;f__Sphingomonadaceae;g__Sphingomonas;s__
a.bin.167	85.61	3.696	23345	4949872	d__Bacteria;p__Methylomirabilota;c__Methylomirabilia;o__Rokubacteriales;f__GWA2-73-35;g__;s__
a.bin.33	85.59	3.289	8282	3368418	d__Bacteria;p__Proteobacteria;c__Alphaproteobacteria;o__Micropepsales;f__Micropepsaceae;g__Rhizomicrobium;s__
a.bin.293	85.45	2.654	12803	2011475	d__Bacteria;p__Proteobacteria;c__Alphaproteobacteria;o__Sphingomonadales;f__Sphingomonadaceae;g__Sphingomicrobium;s__
a.bin.280	85.39	0.561	42807	1078904	d__Bacteria;p__Dependentiae;c__Babeliae;o__Babeliales;f__Vermiphilaceae;g__;s__
a.bin.18	85.36	3.387	8397	7208606	d__Bacteria;p__Myxococcota;c__Polyangia;o__Polyangiales;f__Polyangiaceae;g__;s__
a.bin.180	85.34	5.806	10081	7966183	d__Bacteria;p__Myxococcota;c__Polyangia;o__Polyangiales;f__Polyangiaceae;g__;s__
a.bin.398	85.3	5.555	13566	5626904	d__Bacteria;p__Acidobacteriota;c__Vicinamibacteria;o__Vicinamibacterales;f__SCN-69-37;g__;s__
a.bin.404	85.13	8.187	9020	7504108	d__Bacteria;p__Acidobacteriota;c__Acidobacteriae;o__Bryobacterales;f__Bryobacteraceae;g__Solibacter;s__
a.bin.68	85.01	6.979	6870	3495869	d__Bacteria;p__Proteobacteria;c__Alphaproteobacteria;o__Rhizobiales;f__Xanthobacteraceae;g__Pseudolabrys;s__
a.bin.299	84.99	2.984	9547	2363134	d__Bacteria;p__Verrucomicrobiota;c__Verrucomicrobiae;o__Chthoniobacterales;f__UBA10450;g__Palsa-1382;s__
a.bin.237	84.88	4.385	9349	10317644	d__Bacteria;p__Myxococcota;c__Myxococcia;o__Myxococcales;f__Myxococcaceae;g__Archangium;s__
a.bin.217	84.88	1.902	11324	2424773	d__Bacteria;p__Proteobacteria;c__Gammaproteobacteria;o__Steroidobacterales;f__Steroidobacteraceae;g__FEN-1191;s__
a.bin.421	84.59	5.555	45361	4094663	d__Bacteria;p__Actinobacteriota;c__Acidimicrobiia;o__Acidimicrobiales;f__JACDCH01;g__;s__
a.bin.192	84.33	3.121	6006	3823203	d__Bacteria;p__Bacteroidota;c__Bacteroidia;o__AKYH767;f__B-17BO;g__UBA2475;s__
a.bin.36	84.32	7.186	10152	4232257	d__Bacteria;p__Proteobacteria;c__Gammaproteobacteria;o__Burkholderiales;f__SG8-39;g__SCGC-AG-212-J23;s__
a.bin.417	84.3	3.548	10441	7877871	d__Bacteria;p__Myxococcota;c__Polyangia;o__Haliangiales;f__Haliangiaceae;g__JABFXX01;s__
a.bin.173	84.28	1.005	8994	2198463	d__Bacteria;p__Actinobacteriota;c__Thermoleophilia;o__Solirubrobacterales;f__Solirubrobacteraceae;g__Palsa-744;s__
a.bin.2	84.27	1.083	29798	3470727	d__Bacteria;p__Proteobacteria;c__Alphaproteobacteria;o__Rhizobiales;f__Xanthobacteraceae;g__Pseudolabrys;s__
a.bin.117	84.02	6.971	8234	4402319	d__Bacteria;p__Proteobacteria;c__Alphaproteobacteria;o__Sphingomonadales;f__Sphingomonadaceae;g__Novosphingobium;s__
a.bin.156	83.84	6.107	7632	4960936	d__Bacteria;p__Acidobacteriota;c__Acidobacteriae;o__Acidobacteriales;f__Koribacteraceae;g__;s__
a.bin.378	83.64	3.914	11722	3639147	d__Bacteria;p__Verrucomicrobiota;c__Verrucomicrobiae;o__Palsa-1439;f__Palsa-1439;g__Palsa-1439;s__
a.bin.357	83.63	5.982	23051	9679257	d__Bacteria;p__Acidobacteriota;c__Vicinamibacteria;o__Vicinamibacterales;f__;g__;s__
a.bin.61	83.63	1.203	14037	4231429	d__Bacteria;p__Planctomycetota;c__Phycisphaerae;o__Phycisphaerales;f__SM1A02;g__JABWBB01;s__
a.bin.277	83.61	4.7	19172	4052906	d__Bacteria;p__Actinobacteriota;c__Acidimicrobiia;o__IMCC26256;f__PALSA-610;g__;s__
a.bin.265	83.6	1.961	7225	2431740	d__Bacteria;p__Verrucomicrobiota;c__Verrucomicrobiae;o__Chthoniobacterales;f__UBA10450;g__Palsa-1382;s__
a.bin.281	83.51	0	22586	2668379	d__Bacteria;p__Gemmatimonadota;c__Gemmatimonadetes;o__Gemmatimonadales;f__GWC2-71-9;g__20CM-2-65-7;s__
a.bin.382	83.47	5.53	13425	6393195	d__Bacteria;p__Proteobacteria;c__Alphaproteobacteria;o__Acetobacterales;f__Acetobacteraceae;g__;s__
a.bin.288	83.35	3.949	10448	3938996	d__Bacteria;p__Proteobacteria;c__Gammaproteobacteria;o__Burkholderiales;f__SG8-39;g__SCGC-AG-212-J23;s__
a.bin.305	83.24	3.705	35385	5281645	d__Bacteria;p__Proteobacteria;c__Gammaproteobacteria;o__Steroidobacterales;f__Steroidobacteraceae;g__;s__
a.bin.141	82.95	0.877	7039	2349537	d__Bacteria;p__Acidobacteriota;c__Holophagae;o__Holophagales;f__Holophagaceae;g__;s__
a.bin.53	82.86	2.15	9872	6257912	d__Bacteria;p__Myxococcota;c__Polyangia;o__Palsa-1104;f__Fen-1088;g__;s__
a.bin.302	82.83	3.743	7523	7600380	d__Bacteria;p__Actinobacteriota;c__Actinomycetia;o__Streptosporangiales;f__Streptosporangiaceae;g__;s__
a.bin.175	82.78	4.67	15129	5208993	d__Bacteria;p__Proteobacteria;c__Alphaproteobacteria;o__Rhizobiales;f__Xanthobacteraceae;g__Z2-YC6860;s__
a.bin.407	82.77	9.045	15213	4720023	d__Bacteria;p__Acidobacteriota;c__Vicinamibacteria;o__Vicinamibacterales;f__UBA2999;g__12-FULL-67-14b;s__
a.bin.95	82.6	5.995	9907	4333897	d__Bacteria;p__Proteobacteria;c__Alphaproteobacteria;o__Caulobacterales;f__Caulobacteraceae;g__;s__
a.bin.309	82.59	2.134	7145	4389812	d__Bacteria;p__Bacteroidota;c__Bacteroidia;o__Chitinophagales;f__Chitinophagaceae;g__Flavisolibacter;s__
a.bin.176	82.56	3.047	6810	3267786	d__Bacteria;p__Proteobacteria;c__Alphaproteobacteria;o__Micropepsales;f__Micropepsaceae;g__Rhizomicrobium;s__
a.bin.283	82.41	4.7	24150	4148622	d__Bacteria;p__Acidobacteriota;c__Acidobacteriae;o__UBA7541;f__UBA7541;g__Palsa-360;s__
a.bin.84	82.39	7.059	10424	7043442	d__Bacteria;p__Proteobacteria;c__Gammaproteobacteria;o__Steroidobacterales;f__Steroidobacteraceae;g__13-2-20CM-66-19;s__
a.bin.150	82.35	1.549	4746	4124231	d__Bacteria;p__Acidobacteriota;c__Acidobacteriae;o__Acidobacteriales;f__Koribacteraceae;g__;s__
a.bin.341	82.34	9.455	6963	5498307	d__Bacteria;p__Acidobacteriota;c__Acidobacteriae;o__Acidobacteriales;f__Koribacteraceae;g__;s__
a.bin.133	82.3	7.656	9205	3020191	d__Bacteria;p__Proteobacteria;c__Alphaproteobacteria;o__Caulobacterales;f__Hyphomonadaceae;g__Terricaulis;s__
a.bin.199	82.29	3.795	10881	3737404	d__Bacteria;p__Verrucomicrobiota;c__Verrucomicrobiae;o__Chthoniobacterales;f__UBA10450;g__Palsa-1392;s__
a.bin.146	82.19	7.875	12596	4429682	d__Bacteria;p__Gemmatimonadota;c__Gemmatimonadetes;o__Gemmatimonadales;f__GWC2-71-9;g__JACDDX01;s__
a.bin.388	82.18	0	69448	800974	d__Bacteria;p__Patescibacteria;c__Paceibacteria;o__UBA9983_A;f__PALSA-1337;g__C7867-002;s__
a.bin.169	82.17	2.971	9975	2446781	d__Bacteria;p__Proteobacteria;c__Alphaproteobacteria;o__Sphingomonadales;f__Sphingomonadaceae;g__Allosphingosinicella;s__
a.bin.78	82.16	2.434	5751	6507104	d__Bacteria;p__Proteobacteria;c__Alphaproteobacteria;o__Rhizobiales;f__Xanthobacteraceae;g__Bradyrhizobium;s__
a.bin.292	82	3.296	31717	5627010	d__Bacteria;p__Gemmatimonadota;c__Gemmatimonadetes;o__Gemmatimonadales;f__Gemmatimonadaceae;g__AG2;s__
a.bin.260	81.97	2.863	8187	2893712	d__Bacteria;p__Actinobacteriota;c__Actinomycetia;o__Actinomycetales;f__Microbacteriaceae;g__Diaminobutyricibacter;s__
a.bin.50	81.95	5.104	7150	3550987	d__Bacteria;p__Actinobacteriota;c__Acidimicrobiia;o__Acidimicrobiales;f__Ilumatobacteraceae;g__;s__
a.bin.254	81.95	6.166	11695	6996446	d__Bacteria;p__Proteobacteria;c__Alphaproteobacteria;o__Rhizobiales;f__Rhizobiaceae;g__Rhizobium;s__Rhizobium tubonense
a.bin.182	81.82	5.195	7638	6499005	d__Bacteria;p__Actinobacteriota;c__Actinomycetia;o__Mycobacteriales;f__Micromonosporaceae;g__Actinoplanes;s__
a.bin.269	81.75	0.984	14815	2165706	d__Bacteria;p__Actinobacteriota;c__Actinomycetia;o__Actinomycetales;f__Microbacteriaceae;g__Lysinimonas_A;s__
a.bin.422	81.63	3.14	11530	2236699	d__Bacteria;p__Actinobacteriota;c__Thermoleophilia;o__Gaiellales;f__Gaiellaceae;g__AC-32;s__
a.bin.400	81.62	4.7	26754	4547286	d__Bacteria;p__Actinobacteriota;c__Acidimicrobiia;o__Acidimicrobiales;f__AC-14;g__CADDZP01;s__
a.bin.411	81.42	2.151	7929	3987843	d__Bacteria;p__Bacteroidota;c__Bacteroidia;o__Chitinophagales;f__Chitinophagaceae;g__Puia;s__
a.bin.209	81.4	1.771	6169	3153563	d__Bacteria;p__Planctomycetota;c__Phycisphaerae;o__Phycisphaerales;f__SM1A02;g__;s__
a.bin.42	81.4	8.62	7035	4335788	d__Bacteria;p__Verrucomicrobiota;c__Verrucomicrobiae;o__Opitutales;f__Opitutaceae;g__Opi-474;s__
a.bin.97	81.34	4.805	6471	3286594	d__Bacteria;p__Proteobacteria;c__Gammaproteobacteria;o__Burkholderiales;f__Casimicrobiaceae;g__;s__
a.bin.25	81.23	4.672	5519	4031874	d__Bacteria;p__Proteobacteria;c__Gammaproteobacteria;o__Burkholderiales;f__Burkholderiaceae;g__Rhizobacter;s__
a.bin.320	81.19	1.825	6973	4101517	d__Bacteria;p__Bacteroidota;c__Bacteroidia;o__Sphingobacteriales;f__Sphingobacteriaceae;g__Mucilaginibacter;s__
a.bin.155	80.95	2.811	6347	2329477	d__Bacteria;p__Gemmatimonadota;c__Gemmatimonadetes;o__Gemmatimonadales;f__GWC2-71-9;g__;s__
a.bin.148	80.93	2.763	11599	3893744	d__Bacteria;p__Actinobacteriota;c__Actinomycetia;o__Propionibacteriales;f__Propionibacteriaceae;g__;s__
a.bin.273	80.92	1.194	8502	7466473	d__Bacteria;p__Actinobacteriota;c__Actinomycetia;o__Streptosporangiales;f__Streptosporangiaceae;g__;s__
a.bin.233	80.92	4.72	6577	2468934	d__Bacteria;p__Proteobacteria;c__Gammaproteobacteria;o__Xanthomonadales;f__Rhodanobacteraceae;g__66-474;s__
a.bin.198	80.89	1.544	7347	3417400	d__Bacteria;p__Proteobacteria;c__Alphaproteobacteria;o__Rhizobiales;f__Hyphomicrobiaceae;g__Hyphomicrobium;s__
a.bin.218	80.8	2.564	10018	2863615	d__Bacteria;p__Acidobacteriota;c__Blastocatellia;o__Pyrinomonadales;f__Pyrinomonadaceae;g__OLB17;s__
a.bin.109	80.73	7.915	22874	7445766	d__Bacteria;p__Acidobacteriota;c__Vicinamibacteria;o__Vicinamibacterales;f__2-12-FULL-66-21;g__;s__
a.bin.245	80.66	5.053	7177	7574961	d__Bacteria;p__Myxococcota;c__Polyangia;o__Palsa-1104;f__Fen-1088;g__;s__
a.bin.386	80.48	7.319	8055	8301135	d__Bacteria;p__Myxococcota;c__Polyangia;o__Haliangiales;f__Haliangiaceae;g__JABFXX01;s__
a.bin.94	80.45	0	54457	837194	d__Bacteria;p__Patescibacteria;c__Paceibacteria;o__UBA9983_A;f__UBA2163;g__C7867-001;s__
a.bin.380	80.42	3.057	12785	4291666	d__Bacteria;p__Proteobacteria;c__Alphaproteobacteria;o__Micropepsales;f__Micropepsaceae;g__CAIYRG01;s__
a.bin.399	80.4	3.934	16669	7123848	d__Bacteria;p__Actinobacteriota;c__Actinomycetia;o__Mycobacteriales;f__Micromonosporaceae;g__Hamadaea;s__
a.bin.376	80.15	2.267	12965	3657123	d__Bacteria;p__Proteobacteria;c__Alphaproteobacteria;o__Rhizobiales;f__Xanthobacteraceae;g__Pseudolabrys;s__
a.bin.157	80.08	3.658	9838	3302080	d__Bacteria;p__Proteobacteria;c__Gammaproteobacteria;o__Burkholderiales;f__UKL13-2;g__GR16-43;s__
a.bin.325	80.07	5.851	8589	4955350	d__Bacteria;p__Acidobacteriota;c__Vicinamibacteria;o__Vicinamibacterales;f__2-12-FULL-66-21;g__;s__
a.bin.264	79.98	6.75	4420	5535647	d__Bacteria;p__Armatimonadota;c__SYMT01;o__SYMT01;f__SYMT01;g__;s__
a.bin.85	79.97	3.807	8734	2017086	d__Bacteria;p__Actinobacteriota;c__Thermoleophilia;o__Solirubrobacterales;f__70-9;g__;s__
a.bin.124	79.77	0.431	7580	3399448	d__Bacteria;p__Actinobacteriota;c__Thermoleophilia;o__Gaiellales;f__;g__;s__
a.bin.30	79.74	5.439	8734	4685275	d__Bacteria;p__Planctomycetota;c__UBA1135;o__UBA1135;f__GCA-002686595;g__;s__
a.bin.392	79.7	0.99	108671	1022516	d__Bacteria;p__Patescibacteria;c__Saccharimonadia;o__Saccharimonadales;f__UBA4665;g__;s__
a.bin.339	79.5	5.497	8360	4130221	d__Bacteria;p__Proteobacteria;c__Gammaproteobacteria;o__Burkholderiales;f__Casimicrobiaceae;g__VBCG01;s__
a.bin.246	79.48	3.52	6731	4943197	d__Bacteria;p__Bacteroidota;c__Bacteroidia;o__Chitinophagales;f__Chitinophagaceae;g__46-32;s__
a.bin.171	79.28	0.862	16624	3100096	d__Bacteria;p__Actinobacteriota;c__Thermoleophilia;o__Gaiellales;f__Gaiellaceae;g__PALSA-600;s__
a.bin.363	79.18	0.81	11949	2398077	d__Bacteria;p__Verrucomicrobiota;c__Verrucomicrobiae;o__Chthoniobacterales;f__UBA10450;g__;s__
a.bin.236	79.08	1.98	6107	3704460	d__Bacteria;p__Chloroflexota;c__Ktedonobacteria;o__Ktedonobacterales;f__;g__;s__
a.bin.410	79.07	6.658	10116	3472935	d__Bacteria;p__Gemmatimonadota;c__Gemmatimonadetes;o__Gemmatimonadales;f__GWC2-71-9;g__DSTP01;s__
a.bin.211	78.99	2.011	10342	3620404	d__Bacteria;p__Actinobacteriota;c__Thermoleophilia;o__Gaiellales;f__;g__;s__
a.bin.258	78.87	3.405	14973	3689861	d__Bacteria;p__Proteobacteria;c__Alphaproteobacteria;o__Micropepsales;f__Micropepsaceae;g__Rhizomicrobium;s__
a.bin.343	78.82	0.135	6604	5410618	d__Bacteria;p__Verrucomicrobiota;c__Verrucomicrobiae;o__Pedosphaerales;f__SXQI01;g__;s__
a.bin.183	78.8	5.445	5669	2802802	d__Bacteria;p__Verrucomicrobiota;c__Verrucomicrobiae;o__Chthoniobacterales;f__UBA10450;g__;s__
a.bin.361	78.71	3.846	6617	4394443	d__Bacteria;p__Proteobacteria;c__Gammaproteobacteria;o__Steroidobacterales;f__Steroidobacteraceae;g__PALSA-1196;s__
a.bin.137	78.7	7.142	6132	4625551	d__Bacteria;p__Gemmatimonadota;c__Gemmatimonadetes;o__Gemmatimonadales;f__Gemmatimonadaceae;g__AG11;s__
a.bin.355	78.65	2.478	11753	3228153	d__Bacteria;p__Proteobacteria;c__Alphaproteobacteria;o__Micropepsales;f__Micropepsaceae;g__CAIYRG01;s__
a.bin.101	78.64	0.54	16124	2683049	d__Bacteria;p__Actinobacteriota;c__Actinomycetia;o__Mycobacteriales;f__;g__;s__
a.bin.158	78.51	1.994	5314	3066353	d__Bacteria;p__Acidobacteriota;c__Blastocatellia;o__Pyrinomonadales;f__Pyrinomonadaceae;g__OLB17;s__
a.bin.29	78.5	2.515	9384	3124878	d__Bacteria;p__Proteobacteria;c__Alphaproteobacteria;o__Rhizobiales;f__Xanthobacteraceae;g__Bradyrhizobium;s__
a.bin.220	78.38	3.08	6374	6061792	d__Bacteria;p__Chloroflexota;c__UBA6077;o__UBA6077;f__CF-72;g__CF-72;s__
a.bin.164	78.36	6.944	5501	3377791	d__Bacteria;p__Proteobacteria;c__Gammaproteobacteria;o__Burkholderiales;f__SG8-39;g__;s__
a.bin.17	78.29	0	8718	4562247	d__Bacteria;p__Acidobacteriota;c__Acidobacteriae;o__Acidobacteriales;f__Gp1-AA117;g__Gp1-AA17;s__
a.bin.241	78.28	4.278	9366	6188304	d__Bacteria;p__Actinobacteriota;c__Actinomycetia;o__Streptosporangiales;f__Streptosporangiaceae;g__Palsa-506;s__
a.bin.391	78.11	7.977	6654	3809639	d__Bacteria;p__Acidobacteriota;c__Blastocatellia;o__Pyrinomonadales;f__Pyrinomonadaceae;g__OLB17;s__
a.bin.191	78.02	6.511	4326	3030352	d__Bacteria;p__Acidobacteriota;c__Thermoanaerobaculia;o__UBA5066;f__Gp7-AA6;g__;s__
a.bin.409	77.94	1.131	6137	3131161	d__Bacteria;p__Armatimonadota;c__Fimbriimonadia;o__Fimbriimonadales;f__Fimbriimonadaceae;g__;s__
a.bin.300	77.92	2.564	18808	5615280	d__Bacteria;p__Acidobacteriota;c__Blastocatellia;o__Pyrinomonadales;f__Pyrinomonadaceae;g__UBA11740;s__
a.bin.327	77.9	3.73	8924	5500952	d__Bacteria;p__Bacteroidota;c__Bacteroidia;o__Sphingobacteriales;f__Sphingobacteriaceae;g__Mucilaginibacter;s__
a.bin.165	77.79	1.728	15257	4416537	d__Bacteria;p__Proteobacteria;c__Alphaproteobacteria;o__ATCC43930;f__Stellaceae;g__CAIKMD01;s__
a.bin.4	77.66	5.217	8377	3969129	d__Bacteria;p__Proteobacteria;c__Alphaproteobacteria;o__ATCC43930;f__Stellaceae;g__CAIKMD01;s__
a.bin.77	77.6	5.927	10778	5791667	d__Bacteria;p__Bacteroidota;c__Bacteroidia;o__Chitinophagales;f__Chitinophagaceae;g__Puia;s__
a.bin.106	77.58	9.31	14149	5448585	d__Bacteria;p__Actinobacteriota;c__Acidimicrobiia;o__IMCC26256;f__PALSA-555;g__;s__
a.bin.290	77.57	2.364	12597	3091401	d__Bacteria;p__Verrucomicrobiota;c__Verrucomicrobiae;o__Chthoniobacterales;f__UBA10450;g__;s__
a.bin.371	77.56	3.472	5729	5175392	d__Bacteria;p__Acidobacteriota;c__Acidobacteriae;o__Acidobacteriales;f__Koribacteraceae;g__;s__
a.bin.47	77.55	7.905	8352	5700334	d__Bacteria;p__Verrucomicrobiota;c__Verrucomicrobiae;o__Pedosphaerales;f__UBA8199;g__PSRM01;s__
a.bin.66	77.24	2.617	9194	4400030	d__Bacteria;p__Acidobacteriota;c__Acidobacteriae;o__Acidobacteriales;f__Koribacteraceae;g__Sulfotelmatobacter;s__
a.bin.318	77.22	2.216	5420	4761191	d__Bacteria;p__Actinobacteriota;c__Actinomycetia;o__Mycobacteriales;f__Pseudonocardiaceae;g__Pseudonocardia;s__
a.bin.427	77.22	0.99	102948	1682224	d__Bacteria;p__Patescibacteria;c__Microgenomatia;o__Levybacterales;f__UBA12049;g__JACDET01;s__
a.bin.253	77.03	2.586	15561	3574020	d__Bacteria;p__Bacteroidota;c__Bacteroidia;o__Chitinophagales;f__Chitinophagaceae;g__Sediminibacterium;s__
a.bin.336	76.94	2.586	11494	3749842	d__Bacteria;p__Acidobacteriota;c__Acidobacteriae;o__Acidobacteriales;f__Acidobacteriaceae;g__Edaphobacter;s__
a.bin.52	76.9	2.394	5540	2434262	d__Bacteria;p__Verrucomicrobiota;c__Verrucomicrobiae;o__Chthoniobacterales;f__UBA10450;g__;s__
a.bin.132	76.88	3.448	12614	6915413	d__Bacteria;p__Acidobacteriota;c__Blastocatellia;o__UBA7656;f__;g__;s__
a.bin.396	76.84	1.645	12581	4531762	d__Bacteria;p__Proteobacteria;c__Alphaproteobacteria;o__Rhizobiales;f__Xanthobacteraceae;g__Z2-YC6860;s__
a.bin.74	76.82	4.385	9961	10398243	d__Bacteria;p__Acidobacteriota;c__Acidobacteriae;o__Bryobacterales;f__Bryobacteraceae;g__PALSA-129;s__
a.bin.120	76.73	4.104	7747	3590485	d__Bacteria;p__Proteobacteria;c__Gammaproteobacteria;o__Burkholderiales;f__SG8-40;g__;s__
a.bin.328	76.69	3.002	5511	1552003	d__Bacteria;p__Verrucomicrobiota;c__Verrucomicrobiae;o__Opitutales;f__CG1-02-43-26;g__;s__
a.bin.279	76.68	4.187	6454	3239850	d__Bacteria;p__Bacteroidota;c__Bacteroidia;o__Chitinophagales;f__Chitinophagaceae;g__Puia;s__
a.bin.393	76.65	5.559	11020	2723876	d__Bacteria;p__Proteobacteria;c__Alphaproteobacteria;o__Micropepsales;f__Micropepsaceae;g__Rhizomicrobium;s__
a.bin.102	76.58	1.805	9707	3307927	d__Bacteria;p__Proteobacteria;c__Gammaproteobacteria;o__Burkholderiales;f__SG8-39;g__SCGC-AG-212-J23;s__
a.bin.81	76.57	4.367	7115	7649210	d__Bacteria;p__Actinobacteriota;c__Actinomycetia;o__Streptosporangiales;f__Streptosporangiaceae;g__Trebonia;s__
a.bin.310	76.56	0	86350	1216189	d__Bacteria;p__Patescibacteria;c__Microgenomatia;o__UBA1406;f__GWC2-37-13;g__;s__
a.bin.425	76.4	0.11	94676	899368	d__Bacteria;p__Patescibacteria;c__Saccharimonadia;o__Saccharimonadales;f__UBA4665;g__;s__
a.bin.8	76.34	4.13	8784	5981226	d__Bacteria;p__Acidobacteriota;c__Acidobacteriae;o__Bryobacterales;f__Bryobacteraceae;g__Palsa-89;s__
a.bin.311	76.33	4.32	5108	4520522	d__Bacteria;p__Acidobacteriota;c__Blastocatellia;o__Pyrinomonadales;f__Pyrinomonadaceae;g__PSRF01;s__
a.bin.79	76.32	1.55	8073	4936053	d__Bacteria;p__Planctomycetota;c__Planctomycetes;o__Gemmatales;f__Gemmataceae;g__Gemmata;s__
a.bin.262	76.29	5.504	8815	2578117	d__Bacteria;p__Chloroflexota;c__Ellin6529;o__CSP1-4;f__CSP1-4;g__JACDBP01;s__
a.bin.403	76.24	5.982	6992	4087743	d__Bacteria;p__Actinobacteriota;c__Acidimicrobiia;o__Acidimicrobiales;f__AC-14;g__AC-14;s__
a.bin.415	76.2	0.862	36973	4738796	d__Bacteria;p__Proteobacteria;c__Alphaproteobacteria;o__Rhizobiales;f__Labraceae;g__Labrys;s__
a.bin.424	75.94	2.327	6524	2613071	d__Bacteria;p__Gemmatimonadota;c__Gemmatimonadetes;o__Gemmatimonadales;f__Gemmatimonadaceae;g__UBA4720;s__
a.bin.206	75.83	2.027	6966	2344617	d__Bacteria;p__Verrucomicrobiota;c__Verrucomicrobiae;o__Chthoniobacterales;f__UBA10450;g__;s__
a.bin.205	75.67	8.415	7791	4137148	d__Bacteria;p__Chloroflexota;c__Ellin6529;o__CSP1-4;f__CSP1-4;g__;s__
a.bin.92	75.57	1.052	9365	6494395	d__Bacteria;p__Acidobacteriota;c__Acidobacteriae;o__Bryobacterales;f__Bryobacteraceae;g__Solibacter;s__
a.bin.111	75.52	5.238	6330	3559182	d__Bacteria;p__Proteobacteria;c__Alphaproteobacteria;o__Caulobacterales;f__Caulobacteraceae;g__;s__
a.bin.19	75.45	9.521	5437	5604276	d__Bacteria;p__Proteobacteria;c__Alphaproteobacteria;o__Rhizobiales;f__Xanthobacteraceae;g__Bradyrhizobium;s__
a.bin.416	75.38	3.832	8210	6018596	d__Bacteria;p__Actinobacteriota;c__Actinomycetia;o__Streptosporangiales;f__Streptosporangiaceae;g__Trebonia;s__
a.bin.105	75.3	1.88	9714	1629699	d__Bacteria;p__Proteobacteria;c__Alphaproteobacteria;o__Sphingomonadales;f__Sphingomonadaceae;g__Sphingomicrobium;s__
a.bin.149	75.28	3.53	6984	4884075	d__Bacteria;p__Bacteroidota;c__Bacteroidia;o__Chitinophagales;f__Chitinophagaceae;g__Puia;s__
a.bin.45	75.28	0	946927	946927	d__Bacteria;p__Patescibacteria;c__Paceibacteria;o__UBA9983_A;f__UBA2163;g__C7867-001;s__
a.bin.342	75.16	6.623	8602	3623464	d__Bacteria;p__Acidobacteriota;c__Acidobacteriae;o__Acidobacteriales;f__Koribacteraceae;g__;s__
a.bin.266	75.09	1.875	8392	2798999	d__Bacteria;p__Nitrospirota;c__Nitrospiria;o__Nitrospirales;f__Nitrospiraceae;g__Nitrospira_F;s__
a.bin.326	75.09	5.376	6475	2926854	d__Bacteria;p__Proteobacteria;c__Alphaproteobacteria;o__Micavibrionales;f__Micavibrionaceae;g__;s__
a.bin.353	74.99	4.902	4116	5337686	d__Bacteria;p__Planctomycetota;c__Planctomycetes;o__Planctomycetales;f__Planctomycetaceae;g__;s__
a.bin.222	74.91	0	728968	895688	d__Bacteria;p__Patescibacteria;c__Saccharimonadia;o__Saccharimonadales;f__JACDFO01;g__;s__
a.bin.263	74.89	1.945	6872	3200776	d__Bacteria;p__Bacteroidota;c__Bacteroidia;o__Chitinophagales;f__Chitinophagaceae;g__Flavipsychrobacter;s__
a.bin.408	74.71	2.38	5579	2604525	d__Bacteria;p__Proteobacteria;c__Alphaproteobacteria;o__Caulobacterales;f__Hyphomonadaceae;g__Terricaulis;s__
a.bin.226	74.61	3.456	5617	6757616	d__Bacteria;p__Armatimonadota;c__Chthonomonadetes;o__Chthonomonadales;f__Chthonomonadaceae;g__;s__
a.bin.295	74.53	1.851	61286	886153	d__Bacteria;p__Patescibacteria;c__Saccharimonadia;o__UBA4664;f__SCTI01;g__;s__
a.bin.184	74.46	5.172	13283	2687529	d__Bacteria;p__Proteobacteria;c__Alphaproteobacteria;o__Micropepsales;f__Micropepsaceae;g__Rhizomicrobium;s__
a.bin.338	74.26	9.639	13314	7166606	d__Bacteria;p__Proteobacteria;c__Alphaproteobacteria;o__Rhizobiales;f__Xanthobacteraceae;g__;s__
a.bin.162	74.23	3.378	7270	6525586	d__Bacteria;p__Verrucomicrobiota;c__Verrucomicrobiae;o__Pedosphaerales;f__;g__;s__
a.bin.418	74.11	7.918	7178	3564237	d__Bacteria;p__Proteobacteria;c__Alphaproteobacteria;o__Sphingomonadales;f__Sphingomonadaceae;g__Rhizorhabdus;s__
a.bin.385	74.07	1.697	8199	2432154	d__Bacteria;p__Dormibacterota;c__Dormibacteria;o__Dormibacterales;f__Dormibacteraceae;g__Palsa-872;s__
a.bin.414	74.07	0	29072	780452	d__Bacteria;p__Patescibacteria;c__Saccharimonadia;o__UBA4664;f__UBA4664;g__;s__
a.bin.28	74.04	0	6133	3727382	d__Bacteria;p__Acidobacteriota;c__Acidobacteriae;o__Acidobacteriales;f__Koribacteraceae;g__Koribacter;s__
a.bin.317	74.04	9.89	8716	3343324	d__Bacteria;p__Gemmatimonadota;c__Gemmatimonadetes;o__Gemmatimonadales;f__GWC2-71-9;g__SHZT01;s__
a.bin.346	74.03	2.976	4034	3336116	d__Bacteria;p__Proteobacteria;c__Gammaproteobacteria;o__Xanthomonadales;f__Rhodanobacteraceae;g__;s__
a.bin.89	73.93	2.45	7839	4248592	d__Bacteria;p__Cyanobacteria;c__Vampirovibrionia;o__Obscuribacterales;f__;g__;s__
a.bin.122	73.83	0	6748	6666705	d__Bacteria;p__Acidobacteriota;c__Thermoanaerobaculia;o__UBA5704;f__UBA5704;g__UBA5704;s__
a.bin.429	73.76	2.991	7212	4918080	d__Bacteria;p__Acidobacteriota;c__Mor1;o__Mor1;f__;g__;s__
a.bin.76	73.62	4.31	34359	3949687	d__Bacteria;p__Proteobacteria;c__Gammaproteobacteria;o__Xanthomonadales;f__Rhodanobacteraceae;g__;s__
a.bin.330	73.6	0.675	5147	2350128	d__Bacteria;p__Verrucomicrobiota;c__Verrucomicrobiae;o__Chthoniobacterales;f__Chthoniobacteraceae;g__;s__
a.bin.54	73.43	7.139	252089	2604235	d__Bacteria;p__Patescibacteria;c__Doudnabacteria;o__UBA920;f__UBA920;g__UBA920;s__
a.bin.373	73.41	5.507	6884	3464268	d__Bacteria;p__Acidobacteriota;c__Acidobacteriae;o__Bryobacterales;f__Bryobacteraceae;g__;s__
a.bin.44	73.39	5.555	8569	1821391	d__Bacteria;p__Chloroflexota;c__Ellin6529;o__CSP1-4;f__CSP1-4;g__UBA5189;s__
a.bin.304	73.32	4.059	4171	1691925	d__Bacteria;p__Proteobacteria;c__Gammaproteobacteria;o__Burkholderiales;f__Methylophilaceae;g__CABHOJ01;s__
a.bin.88	73.28	1.566	6505	4309228	d__Bacteria;p__Acidobacteriota;c__Acidobacteriae;o__Acidobacteriales;f__Koribacteraceae;g__JABCYV01;s__
a.bin.195	73.27	5.467	4098	2690325	d__Bacteria;p__Proteobacteria;c__Gammaproteobacteria;o__Pseudomonadales;f__Spongiibacteraceae;g__;s__
a.bin.6	73.24	4.398	6999	3276382	d__Bacteria;p__Acidobacteriota;c__Acidobacteriae;o__UBA7541;f__UBA7541;g__UBA7541;s__
a.bin.115	73.23	1.648	11005	2545093	d__Bacteria;p__Gemmatimonadota;c__Gemmatimonadetes;o__Gemmatimonadales;f__Gemmatimonadaceae;g__UBA4720;s__
a.bin.26	73.14	3.977	13065	5907991	d__Bacteria;p__Planctomycetota;c__Phycisphaerae;o__UBA1161;f__UBA1161;g__;s__
a.bin.178	73.11	4.553	7407	2674586	d__Bacteria;p__Bacteroidota;c__Ignavibacteria;o__SJA-28;f__OLB5;g__;s__
a.bin.225	73.1	4.87	6922	2612906	d__Bacteria;p__Proteobacteria;c__Alphaproteobacteria;o__Caulobacterales;f__Hyphomonadaceae;g__Terricaulis;s__
a.bin.60	73.1	0.907	6504	4382017	d__Bacteria;p__Verrucomicrobiota;c__Verrucomicrobiae;o__Verrucomicrobiales;f__Verrucomicrobiaceae;g__Prosthecobacter;s__
a.bin.435	73.06	6.164	4723	6818683	d__Bacteria;p__Myxococcota;c__Polyangia;o__Polyangiales;f__Polyangiaceae;g__;s__
a.bin.349	73.05	1.515	4758	2057686	d__Bacteria;p__Proteobacteria;c__Alphaproteobacteria;o__Sphingomonadales;f__Sphingomonadaceae;g__Sphingomicrobium;s__
a.bin.289	73	5.555	18832	3585272	d__Bacteria;p__Actinobacteriota;c__Acidimicrobiia;o__Acidimicrobiales;f__JACDCH01;g__;s__
a.bin.152	72.96	4.7	14562	3726690	d__Bacteria;p__Actinobacteriota;c__Acidimicrobiia;o__IMCC26256;f__PALSA-610;g__;s__
a.bin.240	72.9	4.158	6526	4119610	d__Bacteria;p__Chloroflexota;c__Ktedonobacteria;o__Ktedonobacterales;f__;g__;s__
a.bin.428	72.81	4.905	6852	3962050	d__Bacteria;p__Proteobacteria;c__Gammaproteobacteria;o__Burkholderiales;f__SG8-39;g__SCGC-AG-212-J23;s__
a.bin.108	72.61	3.941	10088	4347926	d__Bacteria;p__Actinobacteriota;c__Acidimicrobiia;o__Acidimicrobiales;f__;g__;s__
a.bin.412	72.49	2.586	6293	3146105	d__Bacteria;p__Proteobacteria;c__Alphaproteobacteria;o__Caulobacterales;f__Hyphomonadaceae;g__Terricaulis;s__
a.bin.197	72.37	2.195	9436	2981448	d__Bacteria;p__Verrucomicrobiota;c__Verrucomicrobiae;o__Chthoniobacterales;f__UBA10450;g__Palsa-1392;s__
a.bin.324	72.26	2.932	4118	6035074	d__Bacteria;p__Actinobacteriota;c__Actinomycetia;o__Streptomycetales;f__Streptomycetaceae;g__Streptomyces;s__
a.bin.201	71.89	6.896	21997	7690390	d__Bacteria;p__Proteobacteria;c__Alphaproteobacteria;o__Rhizobiales;f__Xanthobacteraceae;g__PALSA-894;s__
a.bin.323	71.86	3.448	6302	2716855	d__Bacteria;p__Gemmatimonadota;c__Gemmatimonadetes;o__Gemmatimonadales;f__Gemmatimonadaceae;g__Palsa-1248;s__
a.bin.285	71.85	1.1	28236	1112492	d__Bacteria;p__Patescibacteria;c__UBA1384;o__CAILIB01;f__CAILIB01;g__;s__
a.bin.365	71.78	3.571	19103	11416028	d__Bacteria;p__Actinobacteriota;c__Actinomycetia;o__Mycobacteriales;f__Micromonosporaceae;g__Actinoplanes;s__
a.bin.261	71.76	8.823	6111	5087154	d__Bacteria;p__Verrucomicrobiota;c__Verrucomicrobiae;o__Chthoniobacterales;f__;g__;s__
a.bin.335	71.75	0.925	487075	893330	d__Bacteria;p__Patescibacteria;c__Saccharimonadia;o__UBA4664;f__UBA4664;g__;s__
a.bin.65	71.75	1.318	41279	826383	d__Bacteria;p__Patescibacteria;c__Saccharimonadia;o__UBA4664;f__UBA4664;g__;s__
a.bin.161	71.73	8.969	4457	3108469	d__Bacteria;p__Elusimicrobiota;c__Elusimicrobia;o__UBA1565;f__UBA9628;g__PALSA-1176;s__
a.bin.223	71.69	1.149	6348	2088004	d__Bacteria;p__Actinobacteriota;c__Thermoleophilia;o__Gaiellales;f__Gaiellaceae;g__JACCRW01;s__
a.bin.377	71.64	1.709	4477	4018000	d__Bacteria;p__Acidobacteriota;c__Thermoanaerobaculia;o__UBA5704;f__UBA5704;g__;s__
a.bin.334	71.45	3.08	50908	1237787	d__Bacteria;p__Patescibacteria;c__Microgenomatia;o__Levybacterales;f__UBA12049;g__;s__
a.bin.116	71.34	2.564	9160	3743265	d__Bacteria;p__Acidobacteriota;c__Blastocatellia;o__Pyrinomonadales;f__Pyrinomonadaceae;g__UBA11740;s__
a.bin.136	71.28	0	6519	3658871	d__Bacteria;p__Proteobacteria;c__Gammaproteobacteria;o__Burkholderiales;f__SG8-39;g__CAIYPG01;s__
a.bin.271	71.27	1.136	5295	6661796	d__Bacteria;p__Planctomycetota;c__Planctomycetes;o__Gemmatales;f__Gemmataceae;g__;s__
a.bin.379	71.21	3.508	24233	7546433	d__Bacteria;p__Myxococcota;c__Polyangia;o__Haliangiales;f__Haliangiaceae;g__JABFXX01;s__
a.bin.82	70.92	9.403	7052	2861656	d__Bacteria;p__Verrucomicrobiota;c__Verrucomicrobiae;o__Chthoniobacterales;f__UBA10450;g__;s__
a.bin.315	70.91	6.149	4748	4717792	d__Bacteria;p__Planctomycetota;c__Planctomycetes;o__Gemmatales;f__Gemmataceae;g__Gemmata;s__
a.bin.179	70.84	0	8130	3463833	d__Bacteria;p__Planctomycetota;c__Phycisphaerae;o__WQYP01;f__WQYP01;g__;s__
a.bin.185	70.76	0	650158	680756	d__Bacteria;p__Patescibacteria;c__Paceibacteria;o__UBA9983_A;f__UBA2163;g__1-14-0-10-45-20;s__
a.bin.358	70.68	2.339	5865	3006865	d__Bacteria;p__Planctomycetota;c__Phycisphaerae;o__Phycisphaerales;f__SM1A02;g__;s__
a.bin.312	70.68	0	10704	6683817	d__Bacteria;p__Proteobacteria;c__Gammaproteobacteria;o__Burkholderiales;f__Burkholderiaceae;g__Cupriavidus;s__Cupriavidus sp000955785
a.bin.352	70.68	1.724	6387	3061459	d__Bacteria;p__Proteobacteria;c__Gammaproteobacteria;o__Burkholderiales;f__Casimicrobiaceae;g__VBCG01;s__
a.bin.177	70.68	0	8048	2880840	d__Bacteria;p__Proteobacteria;c__Gammaproteobacteria;o__Xanthomonadales;f__Xanthomonadaceae;g__Arenimonas;s__
a.bin.434	70.65	4.273	8134	5702047	d__Bacteria;p__Acidobacteriota;c__Vicinamibacteria;o__Vicinamibacterales;f__;g__;s__
a.bin.107	70.51	8.91	13112	761903	d__Bacteria;p__Patescibacteria;c__Saccharimonadia;o__Saccharimonadales;f__UBA4665;g__UBA5150;s__
a.bin.307	70.45	3.296	8733	5748418	d__Bacteria;p__Gemmatimonadota;c__Gemmatimonadetes;o__Gemmatimonadales;f__Gemmatimonadaceae;g__AG2;s__
a.bin.63	70.43	5.555	5724	3555661	d__Bacteria;p__Actinobacteriota;c__Acidimicrobiia;o__Acidimicrobiales;f__GCA-2861595;g__;s__
a.bin.51	70.33	6.403	4892	3475244	d__Bacteria;p__Bacteroidota;c__Bacteroidia;o__Chitinophagales;f__Chitinophagaceae;g__;s__
a.bin.91	70.29	2.09	14703	1277276	d__Bacteria;p__Patescibacteria;c__Microgenomatia;o__Levybacterales;f__UBA12049;g__;s__
a.bin.189	70.29	0.11	25838	905231	d__Bacteria;p__Patescibacteria;c__Saccharimonadia;o__Saccharimonadales;f__OMJO01;g__OMJO01;s__
a.bin.313	70.17	6.034	6940	3392734	d__Bacteria;p__Proteobacteria;c__Gammaproteobacteria;o__Xanthomonadales;f__Rhodanobacteraceae;g__Rhodanobacter;s__
a.bin.56	70.15	9.971	4717	5806201	d__Bacteria;p__Actinobacteriota;c__Thermoleophilia;o__Solirubrobacterales;f__Solirubrobacteraceae;g__Palsa-465;s__

## Sheet: b-BjSa_M26
bin	completeness	contamination	N50	size	classification
b.bin.1	82.17	2.97	13481	2651599	d__Bacteria;p__Chloroflexota;c__Dehalococcoidia;o__UBA2991;f__UBA2991;g__PNKC01;s__
b.bin.10	94.01	3.418	66768	8255047	d__Bacteria;p__Acidobacteriota;c__Blastocatellia;o__Pyrinomonadales;f__Pyrinomonadaceae;g__;s__
b.bin.100	93.05	5.475	37715	4713905	d__Bacteria;p__Proteobacteria;c__Gammaproteobacteria;o__Steroidobacterales;f__Steroidobacteraceae;g__;s__
b.bin.101	86.83	6.081	53700	5362373	d__Bacteria;p__Acidobacteriota;c__Vicinamibacteria;o__Vicinamibacterales;f__UBA2999;g__;s__
b.bin.102	100	3.885	380398	6442262	d__Bacteria;p__Verrucomicrobiota;c__Verrucomicrobiae;o__Pedosphaerales;f__Palsa-1400;g__;s__
b.bin.103	78.1	0	98664	781488	d__Bacteria;p__Patescibacteria;c__Paceibacteria;o__UBA9983_A;f__UBA2163;g__C7867-001;s__
b.bin.104	98.41	2.106	87934	7247461	d__Bacteria;p__Proteobacteria;c__Gammaproteobacteria;o__Burkholderiales;f__SHXO01;g__;s__
b.bin.105	74.93	9.829	20944	3569167	d__Bacteria;p__Actinobacteriota;c__Acidimicrobiia;o__IMCC26256;f__PALSA-555;g__;s__
b.bin.106	86.36	2.84	16072	6600180	d__Bacteria;p__Planctomycetota;c__Phycisphaerae;o__UBA1161;f__UBA1161;g__JACMJD01;s__
b.bin.107	91.25	0.925	30173	4417191	d__Bacteria;p__Armatimonadota;c__Fimbriimonadia;o__Fimbriimonadales;f__Fimbriimonadaceae;g__;s__
b.bin.108	99.12	1.754	131886	6436446	d__Bacteria;p__Acidobacteriota;c__Acidobacteriae;o__Bryobacterales;f__Bryobacteraceae;g__QHXW01;s__
b.bin.109	76.52	1.724	24715	3434965	d__Bacteria;p__Gemmatimonadota;c__Gemmatimonadetes;o__Gemmatimonadales;f__Gemmatimonadaceae;g__Fen-1247;s__
b.bin.11	92.16	2.056	18686	3487505	d__Bacteria;p__Proteobacteria;c__Alphaproteobacteria;o__Rhizobiales;f__Xanthobacteraceae;g__Pseudolabrys;s__
b.bin.110	71.2	1.724	22312	4182109	d__Bacteria;p__Actinobacteriota;c__Acidimicrobiia;o__IMCC26256;f__PALSA-610;g__;s__
b.bin.111	96.75	0	50970	3092857	d__Bacteria;p__Eremiobacterota;c__Eremiobacteria;o__Baltobacterales;f__Baltobacteraceae;g__Tumulicola;s__
b.bin.112	71.67	1.604	13409	5688941	d__Bacteria;p__Actinobacteriota;c__Actinomycetia;o__Streptosporangiales;f__Streptosporangiaceae;g__Trebonia;s__
b.bin.113	81.25	2.564	16960	2976325	d__Bacteria;p__Acidobacteriota;c__Vicinamibacteria;o__Vicinamibacterales;f__UBA2999;g__2-02-FULL-65-29;s__
b.bin.114	80	2.03	12985	4781263	d__Bacteria;p__Proteobacteria;c__Alphaproteobacteria;o__Rhizobiales;f__Xanthobacteraceae;g__Z2-YC6860;s__
b.bin.115	98.72	1.916	51642	3755194	d__Bacteria;p__Proteobacteria;c__Alphaproteobacteria;o__Caulobacterales;f__Hyphomonadaceae;g__;s__
b.bin.116	74.13	0	39358	3645745	d__Bacteria;p__Proteobacteria;c__Alphaproteobacteria;o__Rhizobiales;f__Xanthobacteraceae;g__Pseudolabrys;s__
b.bin.117	94.34	5.072	39360	5820554	d__Bacteria;p__Proteobacteria;c__Gammaproteobacteria;o__Steroidobacterales;f__Steroidobacteraceae;g__;s__
b.bin.118	78.62	0	66900	3785079	d__Bacteria;p__Proteobacteria;c__Alphaproteobacteria;o__Rhizobiales;f__Xanthobacteraceae;g__Pseudolabrys;s__
b.bin.119	77.43	3.238	16081	3915859	d__Bacteria;p__Proteobacteria;c__Gammaproteobacteria;o__SZUA-146;f__SZUA-146;g__;s__
b.bin.12	94.65	3.65	48824	3325010	d__Bacteria;p__Proteobacteria;c__Alphaproteobacteria;o__Sphingomonadales;f__Sphingomonadaceae;g__Sphingomicrobium;s__
b.bin.120	75.37	1.896	15280	2114056	d__Bacteria;p__Actinobacteriota;c__Thermoleophilia;o__Solirubrobacterales;f__70-9;g__;s__
b.bin.121	92.89	5.004	13894	2920003	d__Bacteria;p__Bacteroidota;c__Kapabacteria;o__;f__;g__;s__
b.bin.122	88.16	3.94	5901	5424138	d__Bacteria;p__Bacteroidota;c__Bacteroidia;o__Chitinophagales;f__Chitinophagaceae;g__Puia;s__
b.bin.123	96.27	2.564	210381	5952139	d__Bacteria;p__Acidobacteriota;c__Acidobacteriae;o__Acidobacteriales;f__Koribacteraceae;g__Sulfotelmatobacter;s__
b.bin.124	97.24	0.015	85257	6011708	d__Bacteria;p__Proteobacteria;c__Alphaproteobacteria;o__Sphingomonadales;f__Sphingomonadaceae;g__Rhizorhabdus;s__
b.bin.125	70.76	0	617825	680171	d__Bacteria;p__Patescibacteria;c__Paceibacteria;o__UBA9983_A;f__UBA2163;g__1-14-0-10-45-20;s__
b.bin.126	74.99	0	69822	776291	d__Bacteria;p__Patescibacteria;c__Paceibacteria;o__UBA9983_A;f__PALSA-1337;g__C7867-002;s__
b.bin.127	95.72	1.88	27914	3424369	d__Bacteria;p__Acidobacteriota;c__Blastocatellia;o__Pyrinomonadales;f__Pyrinomonadaceae;g__OLB17;s__
b.bin.128	81.62	2.136	29122	2518874	d__Bacteria;p__UBP7_A;c__4484-113;o__4484-113;f__;g__;s__
b.bin.129	77.99	3.448	8807	2758808	d__Bacteria;p__Bacteroidota;c__Bacteroidia;o__Chitinophagales;f__;g__;s__
b.bin.13	78.73	0	81000	710781	d__Bacteria;p__Patescibacteria;c__Paceibacteria;o__UBA9983_A;f__UBA2163;g__C7867-001;s__
b.bin.130	93.13	4.532	8195	5244902	d__Bacteria;p__Bacteroidota;c__Bacteroidia;o__Chitinophagales;f__Chitinophagaceae;g__UTBCD1;s__
b.bin.131	99.46	2.61	110305	4538394	d__Bacteria;p__Proteobacteria;c__Gammaproteobacteria;o__Xanthomonadales;f__Rhodanobacteraceae;g__Dokdonella_A;s__
b.bin.132	88.71	9.266	11741	3337076	d__Bacteria;p__Actinobacteriota;c__Actinomycetia;o__Mycobacteriales;f__;g__;s__
b.bin.133	89.07	2.136	32747	4202172	d__Bacteria;p__Actinobacteriota;c__Acidimicrobiia;o__IMCC26256;f__IMCC26256;g__;s__
b.bin.134	86.51	0	222124	1082042	d__Bacteria;p__Dependentiae;c__Babeliae;o__Babeliales;f__Vermiphilaceae;g__;s__
b.bin.135	95.48	2.709	28474	4828457	d__Bacteria;p__Proteobacteria;c__Gammaproteobacteria;o__Xanthomonadales;f__Ahniellaceae;g__;s__
b.bin.136	78.46	9.84	5566	6464338	d__Bacteria;p__Myxococcota;c__Polyangia;o__Haliangiales;f__Haliangiaceae;g__;s__
b.bin.137	97.27	4.083	25254	7547005	d__Bacteria;p__Proteobacteria;c__Gammaproteobacteria;o__Burkholderiales;f__SHXO01;g__;s__
b.bin.138	76.5	2.079	7512	5382733	d__Bacteria;p__Bacteroidota;c__Bacteroidia;o__Sphingobacteriales;f__Sphingobacteriaceae;g__Mucilaginibacter;s__
b.bin.139	81.81	2.564	12180	4113554	d__Bacteria;p__Acidobacteriota;c__Thermoanaerobaculia;o__Gp7-AA8;f__Gp7-AA8;g__;s__
b.bin.14	92.47	0	11774	2225735	d__Bacteria;p__Omnitrophota;c__Omnitrophia;o__Omnitrophales;f__GWA2-52-8;g__;s__
b.bin.140	75.46	0	267556	1204202	d__Bacteria;p__Patescibacteria;c__Gracilibacteria;o__Peribacterales;f__Peribacteraceae;g__VMFU01;s__
b.bin.141	99.32	2.702	82243	5307339	d__Bacteria;p__Verrucomicrobiota;c__Verrucomicrobiae;o__Pedosphaerales;f__UBA3939;g__BOG-1460;s__
b.bin.142	88.47	2.261	9140	3152733	d__Bacteria;p__Bacteroidota;c__Bacteroidia;o__AKYH767-A;f__;g__;s__
b.bin.143	99.9	2.192	78162	9823572	d__Bacteria;p__Acidobacteriota;c__Acidobacteriae;o__Bryobacterales;f__Bryobacteraceae;g__Solibacter;s__
b.bin.144	70.21	0.156	17731	999023	d__Bacteria;p__Patescibacteria;c__Microgenomatia;o__UBA1406;f__GWC2-37-13;g__;s__
b.bin.145	90.95	3.544	43906	4106876	d__Bacteria;p__Proteobacteria;c__Gammaproteobacteria;o__Steroidobacterales;f__Steroidobacteraceae;g__Bog-1198;s__
b.bin.146	83.99	3.418	8319	2815408	d__Bacteria;p__Actinobacteriota;c__UBA4738;o__UBA4738;f__HRBIN12;g__;s__
b.bin.147	86.5	5.592	12906	3959589	d__Bacteria;p__Firmicutes;c__Bacilli;o__Bacillales_B;f__DSM-18226;g__Neobacillus;s__
b.bin.148	70.32	2.586	8437	3382196	d__Bacteria;p__Actinobacteriota;c__Thermoleophilia;o__Gaiellales;f__;g__;s__
b.bin.149	97.37	1.958	79545	4569684	d__Bacteria;p__Proteobacteria;c__Gammaproteobacteria;o__Xanthomonadales;f__Rhodanobacteraceae;g__;s__
b.bin.15	70.52	5.263	51317	7666774	d__Bacteria;p__Verrucomicrobiota;c__Verrucomicrobiae;o__Opitutales;f__Opitutaceae;g__ER46;s__
b.bin.150	96.09	3.248	129782	6851923	d__Bacteria;p__Myxococcota;c__Polyangia;o__Polyangiales;f__Polyangiaceae;g__;s__
b.bin.151	95.72	5.982	41350	7168409	d__Bacteria;p__Acidobacteriota;c__Blastocatellia;o__UBA7656;f__UBA7656;g__;s__
b.bin.152	75.32	1.709	11980	4064253	d__Bacteria;p__Acidobacteriota;c__Acidobacteriae;o__Acidobacteriales;f__Koribacteraceae;g__;s__
b.bin.153	76.23	2.31	69643	1636352	d__Bacteria;p__Patescibacteria;c__Microgenomatia;o__Levybacterales;f__UBA12049;g__JACDET01;s__
b.bin.154	82.42	3.761	19925	8523385	d__Bacteria;p__Actinobacteriota;c__Actinomycetia;o__Streptosporangiales;f__Streptosporangiaceae;g__Actinocorallia;s__
b.bin.155	91.14	4.029	27235	6511074	d__Bacteria;p__Gemmatimonadota;c__Gemmatimonadetes;o__Gemmatimonadales;f__Gemmatimonadaceae;g__AG2;s__
b.bin.156	72.57	1.32	129155	926315	d__Bacteria;p__Patescibacteria;c__4484-211;o__;f__;g__;s__
b.bin.157	86.69	1.837	43694	4175840	d__Bacteria;p__Proteobacteria;c__Alphaproteobacteria;o__Rhizobiales;f__Xanthobacteraceae;g__Pseudolabrys;s__
b.bin.158	99.28	1.477	60156	6723621	d__Bacteria;p__Actinobacteriota;c__Actinomycetia;o__Mycobacteriales;f__Pseudonocardiaceae;g__Amycolatopsis;s__Amycolatopsis sulphurea
b.bin.159	96.01	2.892	66617	7372625	d__Bacteria;p__Proteobacteria;c__Alphaproteobacteria;o__Rhizobiales;f__Xanthobacteraceae;g__Bradyrhizobium;s__
b.bin.16	77.01	0	19029	736557	d__Bacteria;p__Patescibacteria;c__Paceibacteria;o__UBA9983_A;f__PALSA-1337;g__C7867-002;s__
b.bin.160	96.72	3.513	26037	5641942	d__Bacteria;p__Verrucomicrobiota;c__Verrucomicrobiae;o__Chthoniobacterales;f__Terrimicrobiaceae;g__;s__
b.bin.161	77.49	0.652	17566	4072256	d__Bacteria;p__Proteobacteria;c__Alphaproteobacteria;o__ATCC43930;f__Stellaceae;g__CAIKMD01;s__
b.bin.162	91.58	3.054	25669	4444839	d__Bacteria;p__Proteobacteria;c__Gammaproteobacteria;o__Steroidobacterales;f__Steroidobacteraceae;g__;s__
b.bin.163	92.37	1.751	26334	3813455	d__Bacteria;p__Bacteroidota;c__Bacteroidia;o__Chitinophagales;f__Chitinophagaceae;g__Palsa-955;s__
b.bin.164	84.87	9.825	6791	4077208	d__Bacteria;p__Actinobacteriota;c__Actinomycetia;o__Actinomycetales;f__Microbacteriaceae;g__Diaminobutyricibacter;s__
b.bin.165	85.84	1.236	14279	1968101	d__Bacteria;p__Omnitrophota;c__Koll11;o__UBA10015;f__GCA-002753745;g__;s__
b.bin.166	89.15	1.709	29831	4974607	d__Bacteria;p__Acidobacteriota;c__Acidobacteriae;o__Acidobacteriales;f__Koribacteraceae;g__;s__
b.bin.167	96.89	1.956	69627	5472891	d__Bacteria;p__Proteobacteria;c__Alphaproteobacteria;o__ATCC43930;f__Stellaceae;g__;s__
b.bin.168	76.92	0.854	31244	3237981	d__Bacteria;p__Acidobacteriota;c__Acidobacteriae;o__UBA7541;f__UBA7541;g__Palsa-295;s__
b.bin.169	87.84	0.797	31453	3188204	d__Bacteria;p__Proteobacteria;c__Alphaproteobacteria;o__Micropepsales;f__Micropepsaceae;g__Rhizomicrobium;s__
b.bin.17	80.4	4.054	16806	3421496	d__Bacteria;p__Verrucomicrobiota;c__Verrucomicrobiae;o__Chthoniobacterales;f__UBA10450;g__;s__
b.bin.170	90.21	9.13	75487	7973456	d__Bacteria;p__Acidobacteriota;c__Acidobacteriae;o__Bryobacterales;f__Bryobacteraceae;g__Palsa-89;s__
b.bin.171	97.52	1.732	19144	6170013	d__Bacteria;p__Bacteroidota;c__Bacteroidia;o__Chitinophagales;f__Chitinophagaceae;g__;s__
b.bin.172	99.44	0.854	96544	5762114	d__Bacteria;p__Acidobacteriota;c__Acidobacteriae;o__Acidobacteriales;f__Koribacteraceae;g__;s__
b.bin.173	76.76	3.703	25406	5370678	d__Bacteria;p__Acidobacteriota;c__Vicinamibacteria;o__Vicinamibacterales;f__UBA2999;g__;s__
b.bin.174	97.44	2.38	43313	6332766	d__Bacteria;p__Verrucomicrobiota;c__Verrucomicrobiae;o__Verrucomicrobiales;f__Verrucomicrobiaceae;g__Prosthecobacter;s__
b.bin.175	88.71	5.009	22370	3675109	d__Bacteria;p__Gemmatimonadota;c__Gemmatimonadetes;o__Longimicrobiales;f__RSA9;g__;s__
b.bin.176	91.51	2.956	14439	3561419	d__Bacteria;p__Bdellovibrionota;c__Bdellovibrionia;o__Bdellovibrionales;f__Bdellovibrionaceae;g__;s__
b.bin.177	97.22	4.32	58848	5293330	d__Bacteria;p__Acidobacteriota;c__Blastocatellia;o__Pyrinomonadales;f__Pyrinomonadaceae;g__JACVRN01;s__
b.bin.178	91.17	1.108	8226	6281839	d__Bacteria;p__Bacteroidota;c__Bacteroidia;o__Chitinophagales;f__Chitinophagaceae;g__Puia;s__
b.bin.179	76.3	5.555	7081	5470781	d__Bacteria;p__Actinobacteriota;c__Acidimicrobiia;o__;f__;g__;s__
b.bin.18	87.4	4.376	31792	3200187	d__Bacteria;p__Proteobacteria;c__Alphaproteobacteria;o__Micropepsales;f__Micropepsaceae;g__Rhizomicrobium;s__
b.bin.180	76.15	2.262	6413	1901286	d__Bacteria;p__Gemmatimonadota;c__Gemmatimonadetes;o__Gemmatimonadales;f__GWC2-71-9;g__;s__
b.bin.181	89.59	7.122	12149	8704086	d__Bacteria;p__Actinobacteriota;c__Actinomycetia;o__Mycobacteriales;f__Micromonosporaceae;g__;s__
b.bin.182	89.84	2.463	16694	6490194	d__Bacteria;p__Bacteroidota;c__Bacteroidia;o__Chitinophagales;f__Chitinophagaceae;g__Puia;s__
b.bin.183	93.25	6.666	19914	4495868	d__Bacteria;p__Acidobacteriota;c__Acidobacteriae;o__UBA7541;f__UBA7541;g__Palsa-295;s__
b.bin.184	79.78	0.216	19827	2280393	d__Bacteria;p__Proteobacteria;c__Gammaproteobacteria;o__Xanthomonadales;f__Rhodanobacteraceae;g__66-474;s__
b.bin.185	89.42	1.709	70877	5782622	d__Bacteria;p__Acidobacteriota;c__Blastocatellia;o__Pyrinomonadales;f__Pyrinomonadaceae;g__UBA11741;s__
b.bin.186	93.61	9.884	7362	7290217	d__Bacteria;p__Actinobacteriota;c__Actinomycetia;o__Propionibacteriales;f__Propionibacteriaceae;g__;s__
b.bin.187	85.14	0.973	30403	5356965	d__Bacteria;p__Acidobacteriota;c__Acidobacteriae;o__Acidobacteriales;f__Koribacteraceae;g__;s__
b.bin.188	71.45	3.378	13384	1993825	d__Bacteria;p__Verrucomicrobiota;c__Verrucomicrobiae;o__Chthoniobacterales;f__UBA10450;g__;s__
b.bin.189	97.7	2.298	67836	9656775	d__Bacteria;p__Planctomycetota;c__Planctomycetes;o__Planctomycetales;f__;g__;s__
b.bin.19	75.61	2.673	14998	6379505	d__Bacteria;p__Actinobacteriota;c__Actinomycetia;o__Streptosporangiales;f__Streptosporangiaceae;g__UBA9676;s__
b.bin.190	78.64	4.216	5038	4926630	d__Bacteria;p__Bacteroidota;c__Bacteroidia;o__Cytophagales;f__Cyclobacteriaceae;g__;s__
b.bin.191	92.67	4.166	33348	10273249	d__Bacteria;p__Acidobacteriota;c__Acidobacteriae;o__Bryobacterales;f__Bryobacteraceae;g__Solibacter;s__
b.bin.192	93.87	1.659	69946	5450716	d__Bacteria;p__Proteobacteria;c__Alphaproteobacteria;o__Rhizobiales;f__Xanthobacteraceae;g__BOG-931;s__
b.bin.193	78.15	1.203	7026	3779635	d__Bacteria;p__Planctomycetota;c__Phycisphaerae;o__Phycisphaerales;f__SM1A02;g__;s__
b.bin.194	95.16	3.043	33494	3196130	d__Bacteria;p__Proteobacteria;c__Alphaproteobacteria;o__Sphingomonadales;f__Sphingomonadaceae;g__Allosphingosinicella;s__
b.bin.195	73.76	0	770073	925380	d__Bacteria;p__Patescibacteria;c__Saccharimonadia;o__Saccharimonadales;f__UBA4665;g__RGVC01;s__
b.bin.197	71.24	4.838	7667	3943107	d__Bacteria;p__Planctomycetota;c__UBA1135;o__UBA1135;f__GCA-002686595;g__;s__
b.bin.198	74.22	7.186	7096	2967084	d__Bacteria;p__Chloroflexota;c__Ellin6529;o__CSP1-4;f__CSP1-4;g__JACDBP01;s__
b.bin.199	80.61	2.97	15281	1813369	d__Bacteria;p__Proteobacteria;c__Alphaproteobacteria;o__Sphingomonadales;f__Sphingomonadaceae;g__Sphingomicrobium;s__
b.bin.2	97.69	2.54	44605	5400910	d__Bacteria;p__Proteobacteria;c__Alphaproteobacteria;o__Rhizobiales;f__Devosiaceae;g__Devosia_A;s__
b.bin.20	98	2.631	48361	8775085	d__Bacteria;p__Acidobacteriota;c__Acidobacteriae;o__Bryobacterales;f__Bryobacteraceae;g__;s__
b.bin.200	81.13	2.197	17055	4183519	d__Bacteria;p__Gemmatimonadota;c__Gemmatimonadetes;o__Gemmatimonadales;f__Gemmatimonadaceae;g__AG2;s__
b.bin.201	83.07	1.149	15056	5109196	d__Bacteria;p__Planctomycetota;c__Planctomycetes;o__Planctomycetales;f__UBA10511;g__SIAF01;s__
b.bin.202	87.46	6.196	19247	6721510	d__Bacteria;p__Acidobacteriota;c__Vicinamibacteria;o__Vicinamibacterales;f__SCN-69-37;g__SCUN01;s__
b.bin.203	98.05	1.576	61273	3092241	d__Bacteria;p__Actinobacteriota;c__Actinomycetia;o__Mycobacteriales;f__SCTD01;g__;s__
b.bin.204	94.4	1.6	54316	2482314	d__Archaea;p__Thermoplasmatota;c__SW-10-69-26;o__;f__;g__;s__
b.bin.205	76.17	1.724	23434	6147170	d__Bacteria;p__Gemmatimonadota;c__Gemmatimonadetes;o__Gemmatimonadales;f__Gemmatimonadaceae;g__AG2;s__
b.bin.206	95.72	0.854	241256	4034104	d__Bacteria;p__Acidobacteriota;c__Acidobacteriae;o__UBA7541;f__UBA7541;g__;s__
b.bin.207	82.53	2.298	26282	5195648	d__Bacteria;p__Planctomycetota;c__Planctomycetes;o__Pirellulales;f__Ga0077529;g__JABDGM01;s__
b.bin.208	83.09	3.418	9814	3791698	d__Bacteria;p__Acidobacteriota;c__Blastocatellia;o__Pyrinomonadales;f__Pyrinomonadaceae;g__OLB17;s__
b.bin.209	90.13	2.608	45125	5112949	d__Bacteria;p__Proteobacteria;c__Alphaproteobacteria;o__ATCC43930;f__Stellaceae;g__AP-15;s__
b.bin.21	77.86	1.212	14963	2736666	d__Bacteria;p__Proteobacteria;c__Alphaproteobacteria;o__Caulobacterales;f__Hyphomonadaceae;g__VFBF01;s__
b.bin.210	76.72	6.41	22197	4093083	d__Bacteria;p__Actinobacteriota;c__Acidimicrobiia;o__IMCC26256;f__PALSA-555;g__;s__
b.bin.211	71.84	1.736	11877	4145169	d__Bacteria;p__Proteobacteria;c__Alphaproteobacteria;o__Rhizobiales;f__Xanthobacteraceae;g__Bradyrhizobium;s__
b.bin.212	90.6	0.238	26306	4808345	d__Bacteria;p__Bacteroidota;c__Bacteroidia;o__Sphingobacteriales;f__Sphingobacteriaceae;g__Mucilaginibacter;s__
b.bin.213	72.37	1.551	13116	2328535	d__Bacteria;p__Proteobacteria;c__Gammaproteobacteria;o__Steroidobacterales;f__Steroidobacteraceae;g__FEN-1191;s__
b.bin.214	83.02	3.418	16036	3942680	d__Bacteria;p__Acidobacteriota;c__Vicinamibacteria;o__Vicinamibacterales;f__SCN-69-37;g__;s__
b.bin.215	87.88	2.101	46953	3201084	d__Bacteria;p__Proteobacteria;c__Alphaproteobacteria;o__Micropepsales;f__Micropepsaceae;g__Rhizomicrobium;s__
b.bin.216	97.38	1.19	36742	5437741	d__Bacteria;p__Bacteroidota;c__Bacteroidia;o__Cytophagales;f__Cyclobacteriaceae;g__;s__
b.bin.217	80.55	0.948	16265	3779403	d__Bacteria;p__Bdellovibrionota;c__Bdellovibrionia_A;o__UBA1018;f__UBA1018;g__CAIRTR01;s__
b.bin.218	92.19	1.991	10105	3670779	d__Bacteria;p__Chloroflexota;c__Chloroflexia;o__Thermomicrobiales;f__;g__;s__
b.bin.219	97.29	5.743	87275	7885558	d__Bacteria;p__Verrucomicrobiota;c__Verrucomicrobiae;o__Pedosphaerales;f__SIBH01;g__;s__
b.bin.22	95.54	0.836	56558	4014201	d__Bacteria;p__Proteobacteria;c__Alphaproteobacteria;o__Micropepsales;f__Micropepsaceae;g__Rhizomicrobium;s__
b.bin.220	70.65	8.62	9018	2477776	d__Bacteria;p__Actinobacteriota;c__Thermoleophilia;o__Gaiellales;f__Gaiellaceae;g__Palsa-739;s__
b.bin.221	95.03	7.252	41890	7356896	d__Bacteria;p__Verrucomicrobiota;c__Verrucomicrobiae;o__Pedosphaerales;f__UBA8199;g__;s__
b.bin.222	83.87	3.159	12728	3762660	d__Bacteria;p__Proteobacteria;c__Gammaproteobacteria;o__Burkholderiales;f__SG8-39;g__SCGC-AG-212-J23;s__
b.bin.223	97.31	5.321	24010	4508485	d__Bacteria;p__Proteobacteria;c__Alphaproteobacteria;o__Rhizobiales;f__Aestuariivirgaceae;g__CABJBCQ01;s__
b.bin.224	84	3.296	34204	2981351	d__Bacteria;p__Gemmatimonadota;c__Gemmatimonadetes;o__Gemmatimonadales;f__GWC2-71-9;g__20CM-2-65-7;s__
b.bin.225	92.34	1.724	32346	8807495	d__Bacteria;p__Planctomycetota;c__Planctomycetes;o__Pirellulales;f__Pirellulaceae;g__Pirellula;s__
b.bin.226	81.38	5.484	17166	7342978	d__Bacteria;p__Proteobacteria;c__Gammaproteobacteria;o__Steroidobacterales;f__Steroidobacteraceae;g__13-2-20CM-66-19;s__
b.bin.227	79.52	4.395	13182	3054043	d__Bacteria;p__Gemmatimonadota;c__Gemmatimonadetes;o__Gemmatimonadales;f__GWC2-71-9;g__;s__
b.bin.228	76.78	2.93	8079	1945920	d__Bacteria;p__Verrucomicrobiota;c__Verrucomicrobiae;o__Chthoniobacterales;f__UBA10450;g__Palsa-1382;s__
b.bin.229	73.64	7.212	8167	5409431	d__Bacteria;p__Acidobacteriota;c__Vicinamibacteria;o__Vicinamibacterales;f__2-12-FULL-66-21;g__;s__
b.bin.23	91.44	1.243	26445	6092955	d__Bacteria;p__Proteobacteria;c__Alphaproteobacteria;o__Acetobacterales;f__Acetobacteraceae;g__Palsa-883;s__
b.bin.230	82.74	0.739	46124	2842532	d__Bacteria;p__Myxococcota;c__UBA727;o__UBA727;f__GCA-2721815;g__;s__
b.bin.231	76.48	2.217	5708	2374040	d__Bacteria;p__Proteobacteria;c__Alphaproteobacteria;o__Rhizobiales;f__Methyloligellaceae;g__Methyloceanibacter;s__
b.bin.232	86.51	6.739	15894	4115108	d__Bacteria;p__Proteobacteria;c__Alphaproteobacteria;o__Reyranellales;f__;g__;s__
b.bin.233	92.02	5	23160	8242779	d__Bacteria;p__Myxococcota;c__Polyangia;o__Polyangiales;f__Polyangiaceae;g__;s__
b.bin.234	100	2.027	607010	3226897	d__Bacteria;p__Verrucomicrobiota;c__Verrucomicrobiae;o__Chthoniobacterales;f__UBA10450;g__AV40;s__
b.bin.235	70.88	3.418	10825	3743005	d__Bacteria;p__Acidobacteriota;c__Vicinamibacteria;o__Vicinamibacterales;f__SCN-69-37;g__;s__
b.bin.236	91.88	2.35	16566	3562943	d__Bacteria;p__Acidobacteriota;c__Thermoanaerobaculia;o__UBA5066;f__Gp7-AA6;g__;s__
b.bin.237	93.6	1.111	20123	3780606	d__Bacteria;p__Bacteroidota;c__Bacteroidia;o__NS11-12g;f__UBA955;g__;s__
b.bin.238	75.33	6.896	15069	1922860	d__Bacteria;p__Actinobacteriota;c__Thermoleophilia;o__Gaiellales;f__Gaiellaceae;g__AC-32;s__
b.bin.239	93.4	1.098	194061	3952592	d__Bacteria;p__Gemmatimonadota;c__Gemmatimonadetes;o__Gemmatimonadales;f__GWC2-71-9;g__;s__
b.bin.24	94.7	1.222	174228	3429984	d__Bacteria;p__Proteobacteria;c__Gammaproteobacteria;o__Nevskiales;f__Nevskiaceae;g__;s__
b.bin.240	77.83	3.668	7300	3246306	d__Bacteria;p__Proteobacteria;c__Gammaproteobacteria;o__Burkholderiales;f__UKL13-2;g__GR16-43;s__
b.bin.241	82.67	2.944	8674	4216709	d__Bacteria;p__Planctomycetota;c__Phycisphaerae;o__Phycisphaerales;f__SM1A02;g__F1-120-MAGs238;s__
b.bin.242	91.51	4.729	21066	3479915	d__Bacteria;p__Verrucomicrobiota;c__Verrucomicrobiae;o__Chthoniobacterales;f__UBA10450;g__;s__
b.bin.243	90.9	1.6	9053	5738053	d__Bacteria;p__Planctomycetota;c__Planctomycetes;o__Planctomycetales;f__UBA10511;g__SIAF01;s__
b.bin.244	92.85	0.892	192902	3490620	d__Bacteria;p__Bdellovibrionota;c__Bdellovibrionia_A;o__UBA1018;f__UBA1018;g__JACMQW01;s__
b.bin.245	71.78	0	39511	723041	d__Bacteria;p__Patescibacteria;c__Paceibacteria;o__UBA9983_A;f__UBA9973;g__UBA9973;s__
b.bin.246	78.73	8.602	12967	5287658	d__Bacteria;p__Acidobacteriota;c__Vicinamibacteria;o__Vicinamibacterales;f__UBA2999;g__12-FULL-67-14b;s__
b.bin.247	91.21	4.189	20804	6019414	d__Bacteria;p__Verrucomicrobiota;c__Verrucomicrobiae;o__Pedosphaerales;f__UBA8199;g__PSRM01;s__
b.bin.248	83.68	1.351	13640	2819987	d__Bacteria;p__Verrucomicrobiota;c__Verrucomicrobiae;o__Chthoniobacterales;f__UBA10450;g__Palsa-1392;s__
b.bin.249	80.34	0	30529	4045893	d__Bacteria;p__Proteobacteria;c__Gammaproteobacteria;o__Steroidobacterales;f__Steroidobacteraceae;g__CAILZL01;s__
b.bin.25	81.19	0.675	22380	1693608	d__Bacteria;p__Chlamydiota;c__Chlamydiia;o__Chlamydiales;f__SM23-39;g__2-02-FULL-45-22_A;s__
b.bin.250	83.19	0.854	8282	2655423	d__Bacteria;p__Cyanobacteria;c__Vampirovibrionia;o__Vampirovibrionales;f__Vampirovibrionaceae;g__;s__
b.bin.251	90.42	1.449	57560	4523696	d__Bacteria;p__Proteobacteria;c__Alphaproteobacteria;o__Micropepsales;f__Micropepsaceae;g__Rhizomicrobium;s__
b.bin.252	95.83	3.965	46512	5403059	d__Bacteria;p__Proteobacteria;c__Alphaproteobacteria;o__Sphingomonadales;f__Sphingomonadaceae;g__Sphingomonas;s__
b.bin.253	97.21	7.397	59902	7976187	d__Bacteria;p__Planctomycetota;c__MHYJ01;o__MHYJ01;f__;g__;s__
b.bin.254	97.84	1.29	56783	7803523	d__Bacteria;p__Desulfobacterota_B;c__Binatia;o__HRBIN30;f__;g__;s__
b.bin.255	75.1	0.854	16041	3392127	d__Bacteria;p__Acidobacteriota;c__Acidobacteriae;o__Acidobacteriales;f__Koribacteraceae;g__;s__
b.bin.256	87.18	1.867	19847	2403785	d__Bacteria;p__Actinobacteriota;c__Thermoleophilia;o__Solirubrobacterales;f__70-9;g__;s__
b.bin.257	72.5	9.012	13720	1920337	d__Bacteria;p__Actinobacteriota;c__Thermoleophilia;o__Solirubrobacterales;f__70-9;g__;s__
b.bin.258	74.13	8.62	16589	4406229	d__Bacteria;p__Acidobacteriota;c__Acidobacteriae;o__Acidobacteriales;f__Koribacteraceae;g__PALSA-270;s__
b.bin.259	72.1	5.494	29483	6077359	d__Bacteria;p__Gemmatimonadota;c__Gemmatimonadetes;o__Gemmatimonadales;f__Gemmatimonadaceae;g__AG2;s__
b.bin.26	89.96	3.947	22113	6757014	d__Bacteria;p__Acidobacteriota;c__Acidobacteriae;o__Bryobacterales;f__Bryobacteraceae;g__Solibacter;s__
b.bin.260	95.69	2.725	18947	7083334	d__Bacteria;p__Bacteroidota;c__Bacteroidia;o__Chitinophagales;f__Chitinophagaceae;g__Puia;s__
b.bin.261	80.46	6.047	18310	2561873	d__Bacteria;p__Proteobacteria;c__Alphaproteobacteria;o__Sphingomonadales;f__Sphingomonadaceae;g__Sphingomicrobium;s__
b.bin.262	96.97	0.144	256602	2894032	d__Bacteria;p__Proteobacteria;c__Alphaproteobacteria;o__Micropepsales;f__Micropepsaceae;g__Rhizomicrobium;s__
b.bin.263	89.73	1.666	9897	5352780	d__Bacteria;p__Proteobacteria;c__Gammaproteobacteria;o__Burkholderiales;f__Burkholderiaceae;g__Variovorax;s__
b.bin.264	95.31	4.844	23385	3005019	d__Bacteria;p__Proteobacteria;c__Gammaproteobacteria;o__DSM-16500;f__DSM-16500;g__;s__
b.bin.265	87.69	7.949	12063	8478064	d__Bacteria;p__Acidobacteriota;c__Acidobacteriae;o__Bryobacterales;f__Bryobacteraceae;g__;s__
b.bin.266	86.72	1.388	28784	4329838	d__Bacteria;p__Armatimonadota;c__Fimbriimonadia;o__Fimbriimonadales;f__Fimbriimonadaceae;g__;s__
b.bin.267	90.63	2.536	12941	2742203	d__Bacteria;p__Proteobacteria;c__Alphaproteobacteria;o__Sphingomonadales;f__Sphingomonadaceae;g__Allosphingosinicella;s__
b.bin.268	79.16	4.729	9461	6524728	d__Bacteria;p__Verrucomicrobiota;c__Verrucomicrobiae;o__Pedosphaerales;f__Pedosphaeraceae;g__Pedosphaera;s__
b.bin.269	74.13	3.448	22126	2695762	d__Bacteria;p__Gemmatimonadota;c__Gemmatimonadetes;o__Gemmatimonadales;f__GWC2-71-9;g__20CM-2-65-7;s__
b.bin.27	90.78	1.754	17386	7060363	d__Bacteria;p__Acidobacteriota;c__Acidobacteriae;o__Bryobacterales;f__Bryobacteraceae;g__;s__
b.bin.270	93.51	0	149893	4971606	d__Bacteria;p__Armatimonadota;c__Abditibacteria;o__Abditibacteriales;f__Abditibacteriaceae;g__Abditibacterium;s__
b.bin.271	86.47	1.739	26996	4231510	d__Bacteria;p__Proteobacteria;c__Alphaproteobacteria;o__Micropepsales;f__Micropepsaceae;g__Rhizomicrobium;s__
b.bin.272	94.32	8.547	25539	3481422	d__Bacteria;p__Acidobacteriota;c__Acidobacteriae;o__UBA7541;f__UBA7541;g__Palsa-295;s__
b.bin.273	85.29	3.387	19090	4498935	d__Bacteria;p__Desulfobacterota_B;c__Binatia;o__UBA9968;f__UBA9968;g__2-12-FULL-60-19;s__
b.bin.274	89.35	4.586	6772	5972645	d__Bacteria;p__Planctomycetota;c__Planctomycetes;o__Planctomycetales;f__Planctomycetaceae;g__;s__
b.bin.275	88.47	1.028	39044	3093181	d__Bacteria;p__Proteobacteria;c__Alphaproteobacteria;o__Caulobacterales;f__Hyphomonadaceae;g__Terricaulis;s__
b.bin.276	79.9	0	18526	1066645	d__Archaea;p__Micrarchaeota;c__Micrarchaeia;o__UBA10214;f__UBA10161;g__;s__
b.bin.277	95.83	3.174	31669	6409276	d__Bacteria;p__Bacteroidota;c__Bacteroidia;o__Sphingobacteriales;f__Sphingobacteriaceae;g__Mucilaginibacter;s__
b.bin.278	71.55	0	15805	3626391	d__Bacteria;p__Gemmatimonadota;c__Gemmatimonadetes;o__Gemmatimonadales;f__Gemmatimonadaceae;g__;s__
b.bin.279	88.89	2.197	37281	3973622	d__Bacteria;p__Gemmatimonadota;c__Gemmatimonadetes;o__Gemmatimonadales;f__GWC2-71-9;g__;s__
b.bin.28	75.92	2.297	6690	3098134	d__Bacteria;p__Gemmatimonadota;c__Gemmatimonadetes;o__Gemmatimonadales;f__Gemmatimonadaceae;g__;s__
b.bin.280	97.62	0.478	302444	3969543	d__Bacteria;p__Proteobacteria;c__Gammaproteobacteria;o__Pseudomonadales;f__Spongiibacteraceae;g__;s__
b.bin.281	74.03	2.004	9495	6270274	d__Bacteria;p__Methylomirabilota;c__Methylomirabilia;o__Rokubacteriales;f__;g__;s__
b.bin.282	71.45	0.99	81987	1211350	d__Bacteria;p__Patescibacteria;c__Microgenomatia;o__Levybacterales;f__UBA12049;g__;s__
b.bin.283	97.29	3.378	44289	4167871	d__Bacteria;p__Verrucomicrobiota;c__Verrucomicrobiae;o__Chthoniobacterales;f__UBA10450;g__AV80;s__
b.bin.284	82.09	4.012	16894	7419273	d__Bacteria;p__Armatimonadota;c__Chthonomonadetes;o__Chthonomonadales;f__Chthonomonadaceae;g__;s__
b.bin.285	92.33	1.115	71599	3990513	d__Bacteria;p__Proteobacteria;c__Alphaproteobacteria;o__Micropepsales;f__Micropepsaceae;g__Rhizomicrobium;s__
b.bin.286	86.64	2.689	41501	3693871	d__Bacteria;p__Proteobacteria;c__Alphaproteobacteria;o__Rhizobiales;f__Xanthobacteraceae;g__Pseudolabrys;s__
b.bin.287	72.93	4.7	10843	4224086	d__Bacteria;p__Actinobacteriota;c__Acidimicrobiia;o__Acidimicrobiales;f__JACDCH01;g__;s__
b.bin.288	99.32	1.486	104074	3905212	d__Bacteria;p__Verrucomicrobiota;c__Verrucomicrobiae;o__Pedosphaerales;f__UBA11358;g__;s__
b.bin.289	90.1	2.741	50553	7018258	d__Bacteria;p__Myxococcota;c__Polyangia;o__Polyangiales;f__Polyangiaceae;g__;s__
b.bin.29	70.66	0.927	12814	5464318	d__Bacteria;p__Proteobacteria;c__Gammaproteobacteria;o__Burkholderiales;f__Burkholderiaceae;g__Caballeronia;s__
b.bin.290	80.3	0	173556	792920	d__Bacteria;p__Patescibacteria;c__Paceibacteria;o__UBA9983_A;f__PALSA-1337;g__C7867-002;s__
b.bin.291	78.79	1.724	35580	6681561	d__Bacteria;p__Proteobacteria;c__Alphaproteobacteria;o__Rhizobiales;f__Labraceae;g__Labrys;s__
b.bin.292	94.01	4.754	31185	5457976	d__Bacteria;p__Acidobacteriota;c__Vicinamibacteria;o__Vicinamibacterales;f__UBA2999;g__Gp6-AA40;s__
b.bin.293	91.88	6.089	27254	3922306	d__Bacteria;p__Acidobacteriota;c__Acidobacteriae;o__UBA7541;f__UBA7541;g__;s__
b.bin.294	87.7	2.262	50226	3107517	d__Bacteria;p__Gemmatimonadota;c__Gemmatimonadetes;o__Gemmatimonadales;f__GWC2-71-9;g__AG25;s__
b.bin.295	93.72	1.769	24070	2603620	d__Bacteria;p__Proteobacteria;c__Alphaproteobacteria;o__Caulobacterales;f__Caulobacteraceae;g__;s__
b.bin.296	73.62	3.44	19123	7827354	d__Bacteria;p__Myxococcota;c__Polyangia;o__Haliangiales;f__Haliangiaceae;g__JABFXX01;s__
b.bin.297	85.15	2.58	13354	8227295	d__Bacteria;p__Myxococcota;c__Polyangia;o__Polyangiales;f__Polyangiaceae;g__;s__
b.bin.298	89.07	2.364	17748	1970551	d__Bacteria;p__Verrucomicrobiota;c__Verrucomicrobiae;o__Opitutales;f__CG1-02-43-26;g__;s__
b.bin.299	78.49	1.709	15536	3524535	d__Bacteria;p__Acidobacteriota;c__Acidobacteriae;o__UBA7541;f__UBA7541;g__Palsa-147;s__
b.bin.3	93.68	3.76	23984	5434939	d__Bacteria;p__Acidobacteriota;c__Thermoanaerobaculia;o__Gp7-AA8;f__Gp7-AA8;g__;s__
b.bin.30	74.09	2.807	8283	6694862	d__Bacteria;p__Actinobacteriota;c__Actinomycetia;o__Mycobacteriales;f__Micromonosporaceae;g__Actinoplanes;s__
b.bin.300	95.97	1.149	61876	7309669	d__Bacteria;p__Planctomycetota;c__Planctomycetes;o__Pirellulales;f__Pirellulaceae;g__SXOA01;s__
b.bin.301	94.35	5.895	67018	5312542	d__Bacteria;p__Proteobacteria;c__Alphaproteobacteria;o__Sphingomonadales;f__Sphingomonadaceae;g__Sphingomonas;s__
b.bin.302	91.31	0.663	28989	2798985	d__Bacteria;p__Proteobacteria;c__Alphaproteobacteria;o__Sphingomonadales;f__Sphingomonadaceae;g__Sphingomicrobium;s__
b.bin.303	88.31	4.628	11883	5850170	d__Bacteria;p__Proteobacteria;c__Gammaproteobacteria;o__Burkholderiales;f__SHXO01;g__;s__
b.bin.304	75.28	0	504106	942690	d__Bacteria;p__Patescibacteria;c__Paceibacteria;o__UBA9983_A;f__UBA2163;g__C7867-001;s__
b.bin.305	72.02	0	13525	2166566	d__Bacteria;p__Gemmatimonadota;c__Gemmatimonadetes;o__Gemmatimonadales;f__GWC2-71-9;g__Palsa-1233;s__
b.bin.306	91.2	2.197	88966	2611771	d__Bacteria;p__Gemmatimonadota;c__Gemmatimonadetes;o__Gemmatimonadales;f__GWC2-71-9;g__Palsa-1233;s__
b.bin.307	96.62	4.646	62476	3607051	d__Bacteria;p__Verrucomicrobiota;c__Verrucomicrobiae;o__Chthoniobacterales;f__UBA10450;g__;s__
b.bin.308	80.95	3.296	10323	3333476	d__Bacteria;p__Gemmatimonadota;c__Gemmatimonadetes;o__Gemmatimonadales;f__Gemmatimonadaceae;g__AG2;s__
b.bin.309	92.5	3.695	14825	3660886	d__Bacteria;p__Bdellovibrionota;c__Bdellovibrionia;o__Bdellovibrionales;f__Bdellovibrionaceae;g__;s__
b.bin.31	85.94	8.581	10486	4359076	d__Bacteria;p__Verrucomicrobiota;c__Verrucomicrobiae;o__Chthoniobacterales;f__UBA10450;g__AV80;s__
b.bin.310	93.39	1.111	15854	4038842	d__Bacteria;p__Bacteroidota;c__Bacteroidia;o__AKYH767;f__B-17BO;g__;s__
b.bin.311	76.14	0	204973	703277	d__Bacteria;p__Patescibacteria;c__Paceibacteria;o__UBA9983_A;f__UBA2163;g__GWA1-54-10;s__
b.bin.312	91.24	1.001	26166	5475590	d__Bacteria;p__Bacteroidota;c__Bacteroidia;o__Chitinophagales;f__Chitinophagaceae;g__Flavisolibacter;s__
b.bin.313	96.37	0	64317	2060922	d__Bacteria;p__Proteobacteria;c__Alphaproteobacteria;o__Micropepsales;f__Micropepsaceae;g__;s__
b.bin.314	77.87	0	20222	946589	d__Bacteria;p__Patescibacteria;c__Paceibacteria;o__UBA9983_A;f__CAIZLB01;g__;s__
b.bin.315	81.03	0	27059	3532435	d__Bacteria;p__Proteobacteria;c__Gammaproteobacteria;o__DSM-16500;f__DSM-16500;g__Aquicella_A;s__
b.bin.316	71.25	3.061	4428	5236605	d__Bacteria;p__Verrucomicrobiota;c__Verrucomicrobiae;o__Verrucomicrobiales;f__Akkermansiaceae;g__Haloferula;s__
b.bin.317	81.41	3.525	10551	4470874	d__Bacteria;p__Methylomirabilota;c__Methylomirabilia;o__Rokubacteriales;f__GWA2-73-35;g__;s__
b.bin.318	72.89	8.642	4512	2289720	d__Bacteria;p__Proteobacteria;c__Gammaproteobacteria;o__Xanthomonadales;f__Xanthomonadaceae;g__Lysobacter_B;s__
b.bin.319	75.78	9.407	11655	7005536	d__Bacteria;p__Acidobacteriota;c__Acidobacteriae;o__20CM-2-55-15;f__20CM-2-55-15;g__;s__
b.bin.32	87.46	1.994	18313	4041891	d__Bacteria;p__Acidobacteriota;c__Acidobacteriae;o__Acidobacteriales;f__Gp1-AA117;g__Gp1-AA17;s__
b.bin.320	85.89	2.564	21518	2434138	d__Bacteria;p__Actinobacteriota;c__Thermoleophilia;o__Solirubrobacterales;f__Solirubrobacteraceae;g__Palsa-744;s__
b.bin.321	89.01	0	10386	3130232	d__Bacteria;p__Gemmatimonadota;c__Gemmatimonadetes;o__Gemmatimonadales;f__GWC2-71-9;g__;s__
b.bin.322	81.53	1.377	18841	3206549	d__Bacteria;p__Proteobacteria;c__Gammaproteobacteria;o__Burkholderiales;f__Casimicrobiaceae;g__VBCG01;s__
b.bin.323	80.07	6.39	7763	4800905	d__Bacteria;p__Proteobacteria;c__Gammaproteobacteria;o__Steroidobacterales;f__Steroidobacteraceae;g__;s__
b.bin.324	96.92	0	141688	2495825	d__Bacteria;p__Proteobacteria;c__Alphaproteobacteria;o__Rickettsiales;f__SXRF01;g__JABDCD01;s__
b.bin.325	81.62	7.407	13566	6753265	d__Bacteria;p__Acidobacteriota;c__Vicinamibacteria;o__Vicinamibacterales;f__2-12-FULL-66-21;g__;s__
b.bin.326	77.18	4.567	5107	4402763	d__Bacteria;p__Armatimonadota;c__Fimbriimonadia;o__Fimbriimonadales;f__Fimbriimonadaceae;g__;s__
b.bin.327	84.4	1.327	15225	1820265	d__Bacteria;p__Proteobacteria;c__Alphaproteobacteria;o__Sphingomonadales;f__Sphingomonadaceae;g__Sphingomicrobium;s__
b.bin.328	91.98	4.568	29221	4598579	d__Bacteria;p__Proteobacteria;c__Gammaproteobacteria;o__Burkholderiales;f__Burkholderiaceae;g__Ramlibacter;s__
b.bin.329	84.98	2.064	16239	6330047	d__Bacteria;p__Myxococcota;c__XYA12-FULL-58-9;o__XYA12-FULL-58-9;f__XYA12-FULL-58-9;g__;s__
b.bin.33	88.52	6.036	18423	3665869	d__Bacteria;p__Acidobacteriota;c__Blastocatellia;o__Pyrinomonadales;f__Pyrinomonadaceae;g__OLB17;s__
b.bin.330	75.64	1.282	18675	3380313	d__Bacteria;p__Acidobacteriota;c__Acidobacteriae;o__UBA7541;f__UBA7541;g__UBA7541;s__
b.bin.331	84.79	4.741	10918	4019027	d__Bacteria;p__Actinobacteriota;c__Thermoleophilia;o__Gaiellales;f__;g__;s__
b.bin.332	88.37	5.829	47100	8729214	d__Bacteria;p__Myxococcota;c__Polyangia;o__Polyangiales;f__;g__;s__
b.bin.333	86.28	5.317	11428	6631714	d__Bacteria;p__Acidobacteriota;c__Acidobacteriae;o__Bryobacterales;f__Bryobacteraceae;g__Solibacter;s__
b.bin.334	98.85	1.724	209507	6469275	d__Bacteria;p__Bacteroidota;c__Bacteroidia;o__Chitinophagales;f__Chitinophagaceae;g__Puia;s__
b.bin.335	94.58	2.262	100656	3810254	d__Bacteria;p__Gemmatimonadota;c__Gemmatimonadetes;o__Gemmatimonadales;f__Gemmatimonadaceae;g__UBA4720;s__
b.bin.336	89.35	4.612	26778	10272420	d__Bacteria;p__Planctomycetota;c__Planctomycetes;o__Gemmatales;f__Gemmataceae;g__Gemmata;s__
b.bin.337	77.39	1.943	25016	3587944	d__Bacteria;p__Proteobacteria;c__Alphaproteobacteria;o__Rhizobiales;f__Xanthobacteraceae;g__Pseudolabrys;s__
b.bin.338	88.54	2.991	29253	4305562	d__Bacteria;p__Actinobacteriota;c__Acidimicrobiia;o__Acidimicrobiales;f__AC-14;g__CADDZP01;s__
b.bin.339	82.06	0.862	74424	6007151	d__Bacteria;p__Proteobacteria;c__Alphaproteobacteria;o__Rhizobiales;f__Labraceae;g__Labrys;s__
b.bin.34	73.5	5.614	11710	4520157	d__Bacteria;p__Verrucomicrobiota;c__Verrucomicrobiae;o__Opitutales;f__Opitutaceae;g__Opi-474;s__
b.bin.340	90.94	4.519	8933	8443645	d__Bacteria;p__Actinobacteriota;c__Actinomycetia;o__Streptosporangiales;f__Streptosporangiaceae;g__;s__
b.bin.341	82.27	2.232	16226	3812876	d__Bacteria;p__Bdellovibrionota;c__Bdellovibrionia;o__Bdellovibrionales;f__UBA1609;g__;s__
b.bin.342	88.86	2.449	47497	4109234	d__Bacteria;p__Proteobacteria;c__Alphaproteobacteria;o__Sphingomonadales;f__Sphingomonadaceae;g__Novosphingobium;s__
b.bin.343	97.26	0.546	205063	3983309	d__Bacteria;p__Bacteroidota;c__Kapabacteria;o__Palsa-1295;f__Palsa-1295;g__PALSA-1295;s__
b.bin.344	94.95	2.854	16920	2525187	d__Bacteria;p__Chloroflexota;c__Ellin6529;o__QHBO01;f__QHBO01;g__CF-82;s__
b.bin.345	86.69	3.418	18517	4139757	d__Bacteria;p__Acidobacteriota;c__Acidobacteriae;o__Acidobacteriales;f__Koribacteraceae;g__Gp1-AA145;s__
b.bin.346	78.73	0	17284	745298	d__Bacteria;p__Patescibacteria;c__Paceibacteria;o__UBA9983_A;f__UBA2163;g__C7867-001;s__
b.bin.347	81.93	9.583	7249	5853928	d__Bacteria;p__Actinobacteriota;c__Actinomycetia;o__Mycobacteriales;f__Mycobacteriaceae;g__Mycobacterium;s__
b.bin.348	95.45	3.398	9612	1908634	d__Archaea;p__Thermoproteota;c__Nitrososphaeria;o__Nitrososphaerales;f__Nitrososphaeraceae;g__TA-21;s__
b.bin.349	90.8	2.621	13471	5704992	d__Bacteria;p__Actinobacteriota;c__Actinomycetia;o__Mycobacteriales;f__Frankiaceae;g__;s__
b.bin.35	81.36	8.62	9406	3630368	d__Bacteria;p__Gemmatimonadota;c__Gemmatimonadetes;o__Gemmatimonadales;f__Gemmatimonadaceae;g__AG11;s__
b.bin.350	78.04	6.362	9065	3389001	d__Bacteria;p__Acidobacteriota;c__Acidobacteriae;o__UBA7541;f__UBA7541;g__;s__
b.bin.351	92.36	2.564	14676	4300205	d__Bacteria;p__Acidobacteriota;c__Thermoanaerobaculia;o__Gp7-AA8;f__Gp7-AA8;g__QHVT01;s__
b.bin.352	94.81	4.664	40119	4720068	d__Bacteria;p__Proteobacteria;c__Alphaproteobacteria;o__Caulobacterales;f__Caulobacteraceae;g__;s__
b.bin.353	74.92	3.062	13472	4433551	d__Bacteria;p__Acidobacteriota;c__Acidobacteriae;o__Acidobacteriales;f__Gp1-AA117;g__Gp1-AA17;s__
b.bin.354	81.98	2.463	10022	2025316	d__Bacteria;p__Bacteroidota;c__Bacteroidia;o__Chitinophagales;f__Chitinophagaceae;g__Flavihumibacter;s__
b.bin.355	79.44	7.413	36089	710201	d__Bacteria;p__Patescibacteria;c__Paceibacteria;o__UBA9983_A;f__UBA9973;g__UBA9973;s__
b.bin.356	80.86	6.466	18731	5091438	d__Bacteria;p__Proteobacteria;c__Alphaproteobacteria;o__Caulobacterales;f__Caulobacteraceae;g__Phenylobacterium;s__
b.bin.357	72.92	0.854	12940	2433174	d__Bacteria;p__Acidobacteriota;c__Blastocatellia;o__Pyrinomonadales;f__Pyrinomonadaceae;g__OLB17;s__
b.bin.358	94.25	7.364	22714	6747800	d__Bacteria;p__Verrucomicrobiota;c__Verrucomicrobiae;o__Pedosphaerales;f__UBA8199;g__PSRM01;s__
b.bin.359	87.15	1.851	13160	3104852	d__Bacteria;p__Dormibacterota;c__Dormibacteria;o__Dormibacterales;f__Dormibacteraceae;g__;s__
b.bin.36	86.33	0	616823	616823	d__Bacteria;p__Patescibacteria;c__Paceibacteria;o__UBA9983_A;f__Zambryskibacteraceae;g__C7867-006;s__
b.bin.360	73.96	0	6352	2627483	d__Bacteria;p__Gemmatimonadota;c__Gemmatimonadetes;o__Gemmatimonadales;f__GWC2-71-9;g__;s__
b.bin.361	91.82	0.978	48140	3798619	d__Bacteria;p__Proteobacteria;c__Alphaproteobacteria;o__Micropepsales;f__Micropepsaceae;g__Rhizomicrobium;s__
b.bin.362	97.5	3.113	491244	5367315	d__Bacteria;p__Fibrobacterota;c__Fibrobacteria;o__UBA11236;f__UBA11236;g__;s__
b.bin.363	90.17	3.663	276790	7481150	d__Bacteria;p__Gemmatimonadota;c__Gemmatimonadetes;o__Gemmatimonadales;f__Gemmatimonadaceae;g__AG2;s__
b.bin.364	91.25	4.873	25511	13373065	d__Bacteria;p__Acidobacteriota;c__Acidobacteriae;o__Bryobacterales;f__Bryobacteraceae;g__PALSA-129;s__
b.bin.365	85.25	5.311	20160	6409293	d__Bacteria;p__Methylomirabilota;c__Methylomirabilia;o__Rokubacteriales;f__GWA2-73-35;g__AR5;s__
b.bin.366	89.71	2.361	8603	3893222	d__Bacteria;p__Acidobacteriota;c__Thermoanaerobaculia;o__UBA5066;f__Gp7-AA6;g__;s__
b.bin.367	85.99	2.956	22570	7529283	d__Bacteria;p__Myxococcota;c__Polyangia;o__Haliangiales;f__Haliangiaceae;g__JABFXX01;s__
b.bin.368	74.91	0	895908	895908	d__Bacteria;p__Patescibacteria;c__Saccharimonadia;o__Saccharimonadales;f__JACDFO01;g__;s__
b.bin.369	88.83	1.739	17081	2908649	d__Bacteria;p__Proteobacteria;c__Alphaproteobacteria;o__Micropepsales;f__Micropepsaceae;g__CAIYRG01;s__
b.bin.37	86.96	6.225	12700	4041093	d__Bacteria;p__Acidobacteriota;c__Thermoanaerobaculia;o__UBA5066;f__Gp7-AA6;g__;s__
b.bin.370	91.41	2.735	11022	4272167	d__Bacteria;p__Actinobacteriota;c__Acidimicrobiia;o__Acidimicrobiales;f__Ilumatobacteraceae;g__;s__
b.bin.371	94.26	8.032	8493	10779702	d__Bacteria;p__Myxococcota;c__Myxococcia;o__Myxococcales;f__Myxococcaceae;g__Archangium;s__
b.bin.372	82.21	0.344	40039	4150049	d__Bacteria;p__Actinobacteriota;c__Acidimicrobiia;o__Acidimicrobiales;f__JACDCH01;g__;s__
b.bin.373	87.33	7.536	9847	3140141	d__Bacteria;p__Proteobacteria;c__Alphaproteobacteria;o__Micropepsales;f__Micropepsaceae;g__Rhizomicrobium;s__
b.bin.374	96.82	2.085	50966	2640448	d__Bacteria;p__Proteobacteria;c__Alphaproteobacteria;o__Sphingomonadales;f__Sphingomonadaceae;g__Sphingomicrobium;s__
b.bin.375	76.01	0	34609	4463785	d__Bacteria;p__Acidobacteriota;c__Acidobacteriae;o__Acidobacteriales;f__Koribacteraceae;g__JABCZH01;s__
b.bin.376	89.46	2.323	41269	6029250	d__Bacteria;p__Proteobacteria;c__Alphaproteobacteria;o__Rhizobiales;f__Xanthobacteraceae;g__P52-10;s__
b.bin.377	86.87	5.136	10743	10402742	d__Bacteria;p__Chloroflexota;c__Chloroflexia;o__Chloroflexales;f__Roseiflexaceae;g__Kouleothrix;s__
b.bin.378	99.31	2.739	309436	6743946	d__Bacteria;p__Verrucomicrobiota;c__Verrucomicrobiae;o__Opitutales;f__Opitutaceae;g__ER46;s__
b.bin.379	71.69	2.288	15264	3920179	d__Bacteria;p__Proteobacteria;c__Gammaproteobacteria;o__UBA6522;f__UBA6522;g__;s__
b.bin.38	94.87	6.153	29022	6572866	d__Bacteria;p__Acidobacteriota;c__Vicinamibacteria;o__Fen-336;f__Fen-336;g__AA32;s__
b.bin.380	76.28	5.541	7777	3654016	d__Bacteria;p__Proteobacteria;c__Gammaproteobacteria;o__Xanthomonadales;f__Rhodanobacteraceae;g__;s__
b.bin.381	82.88	1.424	18114	3494010	d__Bacteria;p__Proteobacteria;c__Alphaproteobacteria;o__Rhizobiales;f__Xanthobacteraceae;g__Pseudolabrys;s__
b.bin.382	97.38	3.418	131492	5568535	d__Bacteria;p__Acidobacteriota;c__Blastocatellia;o__Pyrinomonadales;f__Pyrinomonadaceae;g__UBA11740;s__
b.bin.383	73.43	0	31504	1393213	d__Bacteria;p__Patescibacteria;c__ABY1;o__SG8-24;f__CAIQCM01;g__;s__
b.bin.384	80.12	2.197	20005	3607764	d__Bacteria;p__Gemmatimonadota;c__Gemmatimonadetes;o__Gemmatimonadales;f__GWC2-71-9;g__20CM-2-65-7;s__
b.bin.385	92.53	3.334	19705	6164288	d__Bacteria;p__Proteobacteria;c__Gammaproteobacteria;o__Pseudomonadales;f__Pseudomonadaceae;g__Pseudomonas_E;s__Pseudomonas_E moorei
b.bin.386	73.61	9.259	316936	1660469	d__Bacteria;p__Patescibacteria;c__Saccharimonadia;o__UBA4664;f__UBA4664;g__;s__
b.bin.387	72.91	7.312	7991	6828618	d__Bacteria;p__Acidobacteriota;c__Blastocatellia;o__UBA7656;f__UBA7656;g__;s__
b.bin.388	72.47	1.123	622156	1041253	d__Bacteria;p__Patescibacteria;c__Saccharimonadia;o__Saccharimonadales;f__2-12-FULL-41-12;g__;s__
b.bin.389	86.31	2.848	28133	3775458	d__Bacteria;p__Proteobacteria;c__Alphaproteobacteria;o__Rhizobiales;f__Xanthobacteraceae;g__Pseudolabrys;s__
b.bin.39	74.11	1.737	12560	3024100	d__Bacteria;p__Proteobacteria;c__Gammaproteobacteria;o__Burkholderiales;f__SG8-39;g__SCGC-AG-212-J23;s__
b.bin.390	70.95	0.99	74845	1561618	d__Bacteria;p__Patescibacteria;c__Saccharimonadia;o__Saccharimonadales;f__UBA4665;g__UBA6224;s__
b.bin.391	80.37	8.981	7632	6569275	d__Bacteria;p__Armatimonadota;c__SYMT01;o__SYMT01;f__SYMT01;g__;s__
b.bin.392	79.59	2.564	9197	4972940	d__Bacteria;p__Acidobacteriota;c__Acidobacteriae;o__Acidobacteriales;f__Koribacteraceae;g__;s__
b.bin.393	85.89	7.579	6778	4595557	d__Bacteria;p__Acidobacteriota;c__Acidobacteriae;o__Acidobacteriales;f__Koribacteraceae;g__;s__
b.bin.394	99.04	0.476	1044097	4195511	d__Bacteria;p__Bacteroidota;c__Bacteroidia;o__AKYH767;f__B-17BO;g__;s__
b.bin.395	77.31	7.91	4934	4286297	d__Bacteria;p__Acidobacteriota;c__Acidobacteriae;o__UBA7541;f__UBA7541;g__UBA7541;s__
b.bin.397	84.36	2.011	6282	2683610	d__Bacteria;p__Dormibacterota;c__Dormibacteria;o__Dormibacterales;f__Dormibacteraceae;g__Palsa-872;s__
b.bin.399	77.87	7.956	5661	2749401	d__Bacteria;p__Verrucomicrobiota;c__Verrucomicrobiae;o__Pedosphaerales;f__UBA11358;g__UBA11358;s__
b.bin.4	78.27	6.688	8624	5920273	d__Bacteria;p__Acidobacteriota;c__Blastocatellia;o__UBA7656;f__UBA7656;g__UBA7656;s__
b.bin.40	96.58	2.788	73495	8659005	d__Bacteria;p__Acidobacteriota;c__Thermoanaerobaculia;o__UBA5704;f__UBA5704;g__UBA5704;s__
b.bin.400	72.22	3.548	10646	5132283	d__Bacteria;p__Myxococcota;c__Polyangia;o__Polyangiales;f__Polyangiaceae;g__;s__
b.bin.401	78.5	2.732	6801	2953202	d__Bacteria;p__Verrucomicrobiota;c__Verrucomicrobiae;o__Chthoniobacterales;f__UBA10450;g__Palsa-1382;s__
b.bin.402	78.08	9.928	6563	3703069	d__Bacteria;p__Actinobacteriota;c__Thermoleophilia;o__Gaiellales;f__Gaiellaceae;g__AC-32;s__
b.bin.403	73.51	1.292	4436	5714707	d__Bacteria;p__Desulfobacterota_B;c__Binatia;o__UTPRO1;f__DP-6;g__;s__
b.bin.404	70.36	1.851	12043	894558	d__Bacteria;p__Patescibacteria;c__Saccharimonadia;o__Saccharimonadales;f__UBA4665;g__;s__
b.bin.405	92.98	7.113	72022	1637695	d__Bacteria;p__Dependentiae;c__Babeliae;o__Babeliales;f__Vermiphilaceae;g__;s__
b.bin.406	77.53	6.756	12646	4541235	d__Bacteria;p__Verrucomicrobiota;c__Verrucomicrobiae;o__Pedosphaerales;f__SXQI01;g__;s__
b.bin.407	74.7	2.938	6348	4257439	d__Bacteria;p__Acidobacteriota;c__Acidobacteriae;o__Acidobacteriales;f__Koribacteraceae;g__;s__
b.bin.408	80.08	4.95	6032	6837386	d__Bacteria;p__Chloroflexota;c__Ktedonobacteria;o__Ktedonobacterales;f__Ktedonobacteraceae;g__CF-113;s__
b.bin.409	83.26	9.74	7218	5209245	d__Bacteria;p__Acidobacteriota;c__Acidobacteriae;o__Acidobacteriales;f__Koribacteraceae;g__;s__
b.bin.41	98.24	0.969	96754	6613648	d__Bacteria;p__Proteobacteria;c__Gammaproteobacteria;o__Pseudomonadales;f__Pseudomonadaceae;g__Pseudomonas_E;s__
b.bin.410	79.6	3.606	9599	5522387	d__Bacteria;p__Proteobacteria;c__Gammaproteobacteria;o__Burkholderiales;f__Burkholderiaceae;g__Duganella;s__Duganella sp013375995
b.bin.411	77.43	3.265	5325	2940566	d__Bacteria;p__Proteobacteria;c__Gammaproteobacteria;o__Steroidobacterales;f__Steroidobacteraceae;g__CAILZL01;s__
b.bin.412	73.26	4.41	271571	1030175	d__Bacteria;p__Patescibacteria;c__Saccharimonadia;o__Saccharimonadales;f__UBA4665;g__;s__
b.bin.413	74.17	5.977	5256	2944723	d__Bacteria;p__Gemmatimonadota;c__Gemmatimonadetes;o__Gemmatimonadales;f__Gemmatimonadaceae;g__UBA4720;s__
b.bin.414	70.11	6.896	14905	1238282	d__Bacteria;p__Patescibacteria;c__Paceibacteria;o__UBA9983_A;f__UBA2163;g__;s__
b.bin.415	85.53	9.401	17411	3966695	d__Bacteria;p__Actinobacteriota;c__Acidimicrobiia;o__Acidimicrobiales;f__JACDCH01;g__;s__
b.bin.416	90.82	2.709	13218	3290073	d__Bacteria;p__Bacteroidota;c__Bacteroidia;o__Chitinophagales;f__;g__;s__
b.bin.42	96.59	0	219597	5163177	d__Bacteria;p__Planctomycetota;c__Phycisphaerae;o__Phycisphaerales;f__SM1A02;g__;s__
b.bin.43	96.67	5.982	67079	7258469	d__Bacteria;p__Acidobacteriota;c__Vicinamibacteria;o__Vicinamibacterales;f__UBA2999;g__;s__
b.bin.44	97.8	0.628	15814	2836320	d__Bacteria;p__Eisenbacteria;c__RBG-16-71-46;o__SZUA-252;f__SZUA-252;g__WS-7;s__
b.bin.45	98.31	1.709	211117	4964902	d__Bacteria;p__Acidobacteriota;c__Acidobacteriae;o__Acidobacteriales;f__Koribacteraceae;g__Sulfotelmatobacter;s__
b.bin.46	74.32	3.49	14650	2831245	d__Bacteria;p__Gemmatimonadota;c__Gemmatimonadetes;o__Gemmatimonadales;f__GWC2-71-9;g__DSTP01;s__
b.bin.47	87.98	2.991	22198	4336460	d__Bacteria;p__Actinobacteriota;c__Acidimicrobiia;o__Acidimicrobiales;f__Ilumatobacteraceae;g__;s__
b.bin.48	78.73	0	696001	710013	d__Bacteria;p__Patescibacteria;c__Paceibacteria;o__UBA9983_A;f__UBA2163;g__C7867-001;s__
b.bin.49	98.9	1.465	108392	5435163	d__Bacteria;p__Fibrobacterota;c__Fibrobacteria;o__UBA11236;f__UBA11236;g__;s__
b.bin.5	83.38	2.564	46925	4494050	d__Bacteria;p__Acidobacteriota;c__Acidobacteriae;o__Acidobacteriales;f__Koribacteraceae;g__;s__
b.bin.50	97.97	5.424	33992	7258535	d__Bacteria;p__Verrucomicrobiota;c__Verrucomicrobiae;o__Chthoniobacterales;f__Chthoniobacteraceae;g__;s__
b.bin.51	98.44	3.057	175233	3881588	d__Bacteria;p__Proteobacteria;c__Alphaproteobacteria;o__Micropepsales;f__Micropepsaceae;g__Rhizomicrobium;s__
b.bin.52	99.14	1.709	125613	5581789	d__Bacteria;p__Acidobacteriota;c__Acidobacteriae;o__Acidobacteriales;f__Koribacteraceae;g__JABDBE01;s__
b.bin.53	78.38	1.986	12927	5264294	d__Bacteria;p__Bacteroidota;c__Bacteroidia;o__Chitinophagales;f__Chitinophagaceae;g__Puia;s__
b.bin.54	80.3	0	683178	695041	d__Bacteria;p__Patescibacteria;c__Paceibacteria;o__UBA9983_A;f__UBA6065;g__UBA6065;s__
b.bin.55	77.47	3.289	10272	8812771	d__Bacteria;p__Acidobacteriota;c__Acidobacteriae;o__Bryobacterales;f__Bryobacteraceae;g__PALSA-129;s__
b.bin.56	89.41	2.991	50931	4046074	d__Bacteria;p__Acidobacteriota;c__Acidobacteriae;o__UBA7541;f__UBA7541;g__UBA7541;s__
b.bin.57	78.32	2.197	26005	2509959	d__Bacteria;p__Gemmatimonadota;c__Gemmatimonadetes;o__Gemmatimonadales;f__GWC2-71-9;g__;s__
b.bin.58	78.6	0	11982	3026966	d__Bacteria;p__Chloroflexota;c__Ellin6529;o__CSP1-4;f__CSP1-4;g__Palsa-1033;s__
b.bin.59	70.08	4.273	15520	3689357	d__Bacteria;p__Acidobacteriota;c__Vicinamibacteria;o__Vicinamibacterales;f__UBA2999;g__;s__
b.bin.6	90.29	2.823	16735	3175898	d__Bacteria;p__Proteobacteria;c__Gammaproteobacteria;o__Burkholderiales;f__SG8-39;g__SCGC-AG-212-J23;s__
b.bin.60	70.06	2.059	18467	2464800	d__Bacteria;p__Proteobacteria;c__Gammaproteobacteria;o__Xanthomonadales;f__Rhodanobacteraceae;g__;s__
b.bin.61	92	2.363	14144	3459890	d__Bacteria;p__Proteobacteria;c__Alphaproteobacteria;o__Acetobacterales;f__Acetobacteraceae;g__Acidocella;s__
b.bin.62	83.58	2.714	10742	4141313	d__Bacteria;p__Bacteroidota;c__Bacteroidia;o__Sphingobacteriales;f__Sphingobacteriaceae;g__Mucilaginibacter;s__
b.bin.63	87.93	4.273	14303	6369776	d__Bacteria;p__Acidobacteriota;c__Blastocatellia;o__Pyrinomonadales;f__Pyrinomonadaceae;g__PSRF01;s__
b.bin.64	73.08	3.839	15524	4688174	d__Bacteria;p__Proteobacteria;c__Gammaproteobacteria;o__Steroidobacterales;f__Steroidobacteraceae;g__;s__
b.bin.65	84.8	2.811	26300	4082880	d__Bacteria;p__Gemmatimonadota;c__Gemmatimonadetes;o__Gemmatimonadales;f__GWC2-71-9;g__20CM-2-65-7;s__
b.bin.66	87.69	5.18	16110	7310728	d__Bacteria;p__Verrucomicrobiota;c__Verrucomicrobiae;o__Pedosphaerales;f__SIBE01;g__;s__
b.bin.67	93.96	4.487	60684	7913218	d__Bacteria;p__Acidobacteriota;c__Blastocatellia;o__UBA7656;f__UBA7656;g__UBA7656;s__
b.bin.68	92.4	1.388	11884	2897611	d__Bacteria;p__Eremiobacterota;c__Eremiobacteria;o__Baltobacterales;f__Baltobacteraceae;g__Cybelea;s__
b.bin.69	82.55	2.586	16662	1871865	d__Bacteria;p__Actinobacteriota;c__Thermoleophilia;o__Solirubrobacterales;f__70-9;g__;s__
b.bin.7	88.29	1.709	24047	4641432	d__Bacteria;p__Acidobacteriota;c__Acidobacteriae;o__Acidobacteriales;f__Koribacteraceae;g__;s__
b.bin.70	97.53	1.313	137411	5510561	d__Bacteria;p__Bacteroidota;c__Bacteroidia;o__Chitinophagales;f__UBA10324;g__;s__
b.bin.71	72.74	3.448	14455	4014296	d__Bacteria;p__Acidobacteriota;c__Acidobacteriae;o__UBA7541;f__UBA7541;g__UBA7541;s__
b.bin.72	90.18	1.813	27107	3880063	d__Bacteria;p__Actinobacteriota;c__Actinomycetia;o__Propionibacteriales;f__Nocardioidaceae;g__Nocardioides;s__
b.bin.73	74.91	0	320754	903825	d__Bacteria;p__Patescibacteria;c__Saccharimonadia;o__Saccharimonadales;f__UBA4665;g__;s__
b.bin.74	89.02	2.089	32916	4321865	d__Bacteria;p__Acidobacteriota;c__Acidobacteriae;o__Acidobacteriales;f__Koribacteraceae;g__JABCZH01;s__
b.bin.75	83.86	0.206	29456	4913816	d__Bacteria;p__Planctomycetota;c__Phycisphaerae;o__Phycisphaerales;f__Phycisphaeraceae;g__;s__
b.bin.76	71.89	0	25606	3434464	d__Bacteria;p__Proteobacteria;c__Alphaproteobacteria;o__Rhizobiales;f__Devosiaceae;g__Devosia_A;s__
b.bin.77	92.06	1.867	38731	2692157	d__Bacteria;p__Actinobacteriota;c__Thermoleophilia;o__Gaiellales;f__Gaiellaceae;g__Palsa-739;s__
b.bin.78	82.81	6.269	13588	8587673	d__Bacteria;p__Planctomycetota;c__Planctomycetes;o__Pirellulales;f__PNKZ01;g__;s__
b.bin.79	92.15	2.709	19547	4306736	d__Bacteria;p__Bacteroidota;c__Bacteroidia;o__Chitinophagales;f__Chitinophagaceae;g__Puia;s__
b.bin.8	71	2.194	10737	2270061	d__Bacteria;p__Proteobacteria;c__Alphaproteobacteria;o__Rhizobiales;f__Hyphomicrobiaceae;g__Hyphomicrobium;s__
b.bin.80	85.59	3.478	22867	5289330	d__Bacteria;p__Proteobacteria;c__Alphaproteobacteria;o__CACIAM-22H2;f__CACIAM-22H2;g__;s__
b.bin.81	79.38	3.32	5362	2654376	d__Bacteria;p__Actinobacteriota;c__Actinomycetia;o__Mycobacteriales;f__;g__;s__
b.bin.82	93.58	1.52	30535	1867314	d__Bacteria;p__Chlamydiota;c__Chlamydiia;o__Chlamydiales;f__SM23-39;g__2-02-FULL-45-22_A;s__
b.bin.83	81.32	1.351	14894	6132170	d__Bacteria;p__Verrucomicrobiota;c__Verrucomicrobiae;o__Pedosphaerales;f__UBA8199;g__PSRM01;s__
b.bin.84	92.3	7.264	123942	8394132	d__Bacteria;p__Acidobacteriota;c__Acidobacteriae;o__20CM-2-55-15;f__20CM-2-55-15;g__20CM-2-55-15;s__
b.bin.85	79.43	2.247	7419	2558628	d__Bacteria;p__FCPU426;c__Palsa-1180;o__Palsa-1180;f__Palsa-1180;g__PALSA-1180;s__
b.bin.86	93.24	2.84	93205	7096941	d__Bacteria;p__Planctomycetota;c__Phycisphaerae;o__UBA1161;f__UBA1161;g__JACMJD01;s__
b.bin.87	78.38	4.83	26858	3163010	d__Bacteria;p__Proteobacteria;c__Gammaproteobacteria;o__Steroidobacterales;f__Steroidobacteraceae;g__13-2-20CM-66-19;s__
b.bin.88	83.84	3.157	9834	8284267	d__Bacteria;p__Actinobacteriota;c__Actinomycetia;o__Mycobacteriales;f__Cryptosporangiaceae;g__;s__
b.bin.89	80.85	9.89	10358	3043713	d__Bacteria;p__Gemmatimonadota;c__Gemmatimonadetes;o__Gemmatimonadales;f__GWC2-71-9;g__JACDDX01;s__
b.bin.9	85.04	2.941	19403	3900549	d__Bacteria;p__Actinobacteriota;c__Actinomycetia;o__Mycobacteriales;f__;g__;s__
b.bin.90	95.72	3.513	14260	5086306	d__Bacteria;p__Acidobacteriota;c__Blastocatellia;o__Pyrinomonadales;f__Pyrinomonadaceae;g__JACMLC01;s__
b.bin.91	94.38	4.296	17060	4195672	d__Bacteria;p__Elusimicrobiota;c__Elusimicrobia;o__UBA1565;f__UBA9628;g__PALSA-1176;s__
b.bin.92	87.52	2.085	37052	5696580	d__Bacteria;p__Verrucomicrobiota;c__Verrucomicrobiae;o__Pedosphaerales;f__UBA3939;g__UBA3939;s__
b.bin.93	89.6	0.967	24128	4934195	d__Bacteria;p__Myxococcota;c__Myxococcia;o__Myxococcales;f__40CM-4-68-19;g__40CM-4-68-19;s__
b.bin.94	96.19	0	211362	3832898	d__Bacteria;p__Bacteroidota;c__Bacteroidia;o__NS11-12g;f__UBA955;g__;s__
b.bin.95	75.11	3.225	10229	5728617	d__Bacteria;p__Myxococcota;c__Polyangia;o__Palsa-1104;f__Fen-1088;g__;s__
b.bin.96	86.95	4.017	19953	4515732	d__Bacteria;p__Acidobacteriota;c__Vicinamibacteria;o__Vicinamibacterales;f__2-12-FULL-66-21;g__;s__
b.bin.97	94.22	2.629	50849	5112513	d__Bacteria;p__Proteobacteria;c__Alphaproteobacteria;o__Caulobacterales;f__Hyphomonadaceae;g__;s__
b.bin.98	74.2	3.588	6636	2707589	d__Bacteria;p__Bacteroidota;c__Ignavibacteria;o__SJA-28;f__OLB5;g__;s__
b.bin.99	74.76	9.086	10495	3036291	d__Bacteria;p__Proteobacteria;c__Alphaproteobacteria;o__Micavibrionales;f__Micavibrionaceae;g__;s__

## Sheet: c-NTC_G210
bin	completeness	contamination	N50	size	classification
c.bin.10	99.32	1.391	105986	3901646	d__Bacteria;p__Verrucomicrobiota;c__Verrucomicrobiae;o__Pedosphaerales;f__UBA11358;g__;s__
c.bin.103	99.12	3.118	133825	9671258	d__Bacteria;p__Acidobacteriota;c__Acidobacteriae;o__Bryobacterales;f__Bryobacteraceae;g__Solibacter;s__
c.bin.105	92.82	1.201	55323	3763290	d__Bacteria;p__Proteobacteria;c__Gammaproteobacteria;o__Burkholderiales;f__Rhodocyclaceae;g__;s__
c.bin.110	91.88	2.896	18505	5042903	d__Bacteria;p__Acidobacteriota;c__Acidobacteriae;o__Acidobacteriales;f__Gp1-AA117;g__Gp1-AA17;s__
c.bin.111	97.11	2.188	25223	3645809	d__Bacteria;p__Proteobacteria;c__Alphaproteobacteria;o__Rhizobiales;f__Aestuariivirgaceae;g__CABJBCQ01;s__
c.bin.114	94.95	3.91	22773	3032333	d__Bacteria;p__Gemmatimonadota;c__Gemmatimonadetes;o__Gemmatimonadales;f__GWC2-71-9;g__JABFSM01;s__
c.bin.115	93.12	3.686	26324	2192312	d__Bacteria;p__Nitrospirota;c__Nitrospiria;o__Nitrospirales;f__Nitrospiraceae;g__2-02-FULL-62-14;s__
c.bin.119	90.59	1.804	10475	4319572	d__Bacteria;p__Actinobacteriota;c__Acidimicrobiia;o__Acidimicrobiales;f__Ilumatobacteraceae;g__;s__
c.bin.121	91.63	2.564	37497	5478422	d__Bacteria;p__Acidobacteriota;c__Vicinamibacteria;o__Fen-336;f__Fen-336;g__;s__
c.bin.124	94.59	0.925	24363	3037569	d__Bacteria;p__Eremiobacterota;c__Eremiobacteria;o__Baltobacterales;f__Baltobacteraceae;g__Cybelea;s__
c.bin.125	98.35	1.521	15706	5552457	d__Bacteria;p__Bacteroidota;c__Bacteroidia;o__Chitinophagales;f__Chitinophagaceae;g__Flavisolibacter;s__
c.bin.131	97.8	1.098	13125	2556936	d__Bacteria;p__Eisenbacteria;c__RBG-16-71-46;o__SZUA-252;f__SZUA-252;g__WS-7;s__
c.bin.133	92.32	1.477	11858	4213381	d__Bacteria;p__Bacteroidota;c__Bacteroidia;o__Chitinophagales;f__Chitinophagaceae;g__Flavisolibacter;s__
c.bin.134	92.68	0.675	12328	1445446	d__Bacteria;p__Chlamydiota;c__Chlamydiia;o__Chlamydiales;f__Rhabdochlamydiaceae;g__JABDFI01;s__
c.bin.138	95.72	0.854	230560	4035867	d__Bacteria;p__Acidobacteriota;c__Acidobacteriae;o__UBA7541;f__UBA7541;g__;s__
c.bin.142	90.49	3.941	19566	4386744	d__Bacteria;p__Verrucomicrobiota;c__Verrucomicrobiae;o__Chthoniobacterales;f__UBA10450;g__AV80;s__
c.bin.149	94.44	2.777	30992	3055179	d__Bacteria;p__Actinobacteriota;c__Thermoleophilia;o__Solirubrobacterales;f__Solirubrobacteraceae;g__Palsa-744;s__
c.bin.152	99.12	1.754	81226	6790805	d__Bacteria;p__Acidobacteriota;c__Acidobacteriae;o__Bryobacterales;f__Bryobacteraceae;g__QHXW01;s__
c.bin.153	98.31	2.564	167000	4829916	d__Bacteria;p__Acidobacteriota;c__Acidobacteriae;o__Acidobacteriales;f__Koribacteraceae;g__Sulfotelmatobacter;s__
c.bin.156	95.29	1.709	14227	3458013	d__Bacteria;p__Actinobacteriota;c__UBA4738;o__UBA4738;f__UBA4738;g__;s__
c.bin.159	91.43	3.418	16553	5642080	d__Bacteria;p__Acidobacteriota;c__Thermoanaerobaculia;o__UBA5704;f__UBA5704;g__;s__
c.bin.160	93.57	3.693	27673	3206974	d__Bacteria;p__Nitrospirota;c__Nitrospiria;o__Nitrospirales;f__Nitrospiraceae;g__Palsa-1315;s__
c.bin.164	93.2	4.206	59654	4105031	d__Bacteria;p__Proteobacteria;c__Gammaproteobacteria;o__Steroidobacterales;f__Steroidobacteraceae;g__;s__
c.bin.171	98.61	0	109926	3057913	d__Bacteria;p__Eremiobacterota;c__Eremiobacteria;o__Baltobacterales;f__Baltobacteraceae;g__Tumulicola;s__
c.bin.173	90.37	1.724	24441	2414618	d__Bacteria;p__Actinobacteriota;c__Thermoleophilia;o__Solirubrobacterales;f__70-9;g__;s__
c.bin.184	91.31	3.561	26041	5018687	d__Bacteria;p__Acidobacteriota;c__Acidobacteriae;o__Acidobacteriales;f__Koribacteraceae;g__Gp1-AA145;s__
c.bin.194	97.12	1.477	27197	5182980	d__Bacteria;p__Bacteroidota;c__Bacteroidia;o__Chitinophagales;f__UBA10324;g__;s__
c.bin.197	90.87	2.197	125828	3126184	d__Bacteria;p__Gemmatimonadota;c__Gemmatimonadetes;o__Gemmatimonadales;f__GWC2-71-9;g__AG25;s__
c.bin.2	98.93	1.698	293601	6168308	d__Bacteria;p__Proteobacteria;c__Gammaproteobacteria;o__Burkholderiales;f__SHXO01;g__;s__
c.bin.208	95.47	1.477	20763	4891813	d__Bacteria;p__Bacteroidota;c__Bacteroidia;o__Chitinophagales;f__Chitinophagaceae;g__Puia;s__
c.bin.209	99.04	2.702	35499	7346355	d__Bacteria;p__Verrucomicrobiota;c__Verrucomicrobiae;o__Pedosphaerales;f__SIBH01;g__;s__
c.bin.213	97.55	1.251	62398	2762866	d__Bacteria;p__Proteobacteria;c__Alphaproteobacteria;o__Sphingomonadales;f__Sphingomonadaceae;g__Sphingobium;s__
c.bin.217	95.39	2.564	31251	4614847	d__Bacteria;p__Acidobacteriota;c__Blastocatellia;o__Pyrinomonadales;f__Pyrinomonadaceae;g__UBA11740;s__
c.bin.22	95.72	0.854	26575	3332883	d__Bacteria;p__Acidobacteriota;c__Acidobacteriae;o__UBA7541;f__UBA7541;g__;s__
c.bin.222	92.01	1.149	11523	4067771	d__Bacteria;p__Proteobacteria;c__Alphaproteobacteria;o__ATCC43930;f__Stellaceae;g__AP-15;s__
c.bin.230	99.14	0.854	127870	4886516	d__Bacteria;p__Acidobacteriota;c__Acidobacteriae;o__Acidobacteriales;f__Koribacteraceae;g__JABDBE01;s__
c.bin.245	94.84	0.391	176335	3283266	d__Bacteria;p__Proteobacteria;c__Alphaproteobacteria;o__Micropepsales;f__Micropepsaceae;g__Rhizomicrobium;s__
c.bin.246	93.96	2.242	22357	3839513	d__Bacteria;p__Proteobacteria;c__Alphaproteobacteria;o__Sphingomonadales;f__Sphingomonadaceae;g__Novosphingobium;s__
c.bin.249	99.22	1.298	361619	3619227	d__Bacteria;p__Proteobacteria;c__Gammaproteobacteria;o__Xanthomonadales;f__Rhodanobacteraceae;g__Dyella_A;s__
c.bin.250	90.81	2.136	14302	3210352	d__Bacteria;p__Acidobacteriota;c__Blastocatellia;o__Pyrinomonadales;f__Pyrinomonadaceae;g__OLB17;s__
c.bin.252	100	2.549	67997	5997148	d__Bacteria;p__Spirochaetota;c__Leptospirae;o__Leptospirales;f__Leptospiraceae;g__UBA2033;s__
c.bin.256	94.77	2.788	24041	7317786	d__Bacteria;p__Acidobacteriota;c__Thermoanaerobaculia;o__UBA5704;f__UBA5704;g__UBA5704;s__
c.bin.261	93.03	4.273	104386	5477982	d__Bacteria;p__Acidobacteriota;c__Acidobacteriae;o__Acidobacteriales;f__Koribacteraceae;g__;s__
c.bin.262	92.98	0.739	34904	2717917	d__Bacteria;p__Proteobacteria;c__Gammaproteobacteria;o__Xanthomonadales;f__Rhodanobacteraceae;g__66-474;s__
c.bin.268	92.96	2.066	12177	4424882	d__Bacteria;p__Verrucomicrobiota;c__Verrucomicrobiae;o__Pedosphaerales;f__SIBH01;g__;s__
c.bin.269	91.55	3.296	12887	3541911	d__Bacteria;p__Gemmatimonadota;c__Gemmatimonadetes;o__Gemmatimonadales;f__GWC2-71-9;g__20CM-2-65-7;s__
c.bin.27	92.83	3.378	13761	3474646	d__Bacteria;p__Verrucomicrobiota;c__Verrucomicrobiae;o__Pedosphaerales;f__UBA11358;g__;s__
c.bin.275	99.2	0.912	52663	6364754	d__Bacteria;p__Proteobacteria;c__Alphaproteobacteria;o__Acetobacterales;f__Acetobacteraceae;g__Palsa-883;s__
c.bin.276	95.72	1.709	309591	4945838	d__Bacteria;p__Acidobacteriota;c__Acidobacteriae;o__UBA7541;f__UBA7541;g__UBA7541;s__
c.bin.28	91.2	2.297	65189	3183722	d__Bacteria;p__Gemmatimonadota;c__Gemmatimonadetes;o__Gemmatimonadales;f__GWC2-71-9;g__Palsa-1233;s__
c.bin.280	96.81	0.463	80750	2117429	d__Bacteria;p__Proteobacteria;c__Alphaproteobacteria;o__Micropepsales;f__Micropepsaceae;g__;s__
c.bin.282	96.58	3.466	19891	5474401	d__Bacteria;p__Acidobacteriota;c__Blastocatellia;o__Pyrinomonadales;f__Pyrinomonadaceae;g__JACMLC01;s__
c.bin.283	95.6	3.296	29169	5807792	d__Bacteria;p__Gemmatimonadota;c__Gemmatimonadetes;o__Gemmatimonadales;f__Gemmatimonadaceae;g__AG2;s__
c.bin.287	91.76	1.424	42293	3456256	d__Bacteria;p__Proteobacteria;c__Alphaproteobacteria;o__Rhizobiales;f__Xanthobacteraceae;g__Pseudolabrys;s__
c.bin.288	90.74	2.407	46935	2727648	d__Bacteria;p__Armatimonadota;c__Fimbriimonadia;o__Fimbriimonadales;f__Fimbriimonadaceae;g__;s__
c.bin.289	90.08	1.098	32950	3175525	d__Bacteria;p__Gemmatimonadota;c__Gemmatimonadetes;o__Gemmatimonadales;f__GWC2-71-9;g__AG25;s__
c.bin.29	94.5	1.098	406029	3984780	d__Bacteria;p__Gemmatimonadota;c__Gemmatimonadetes;o__Gemmatimonadales;f__GWC2-71-9;g__;s__
c.bin.292	95.3	3.046	35137	3504263	d__Bacteria;p__Gemmatimonadota;c__Gemmatimonadetes;o__Gemmatimonadales;f__GWC2-71-9;g__;s__
c.bin.296	95.32	0.93	46105	4829344	d__Bacteria;p__Bacteroidota;c__Bacteroidia;o__Chitinophagales;f__Chitinophagaceae;g__Puia;s__
c.bin.298	94.33	2.474	25360	5745679	d__Bacteria;p__Proteobacteria;c__Gammaproteobacteria;o__Burkholderiales;f__Burkholderiaceae;g__Rhodoferax;s__
c.bin.31	100	1.258	77286	4855532	d__Bacteria;p__Bacteroidota;c__Bacteroidia;o__Chitinophagales;f__Chitinophagaceae;g__UTBCD1;s__
c.bin.34	90.93	4.444	38577	6291748	d__Bacteria;p__Acidobacteriota;c__Vicinamibacteria;o__Fen-336;f__Fen-336;g__AA32;s__
c.bin.35	92.3	1.025	13901	3960497	d__Bacteria;p__Acidobacteriota;c__Thermoanaerobaculia;o__UBA5066;f__Gp7-AA6;g__;s__
c.bin.37	92.98	4.442	17841	3258777	d__Bacteria;p__Proteobacteria;c__Alphaproteobacteria;o__Caulobacterales;f__Hyphomonadaceae;g__Terricaulis;s__
c.bin.4	91.44	2.488	17714	5143745	d__Bacteria;p__Proteobacteria;c__Alphaproteobacteria;o__Sphingomonadales;f__Sphingomonadaceae;g__Rhizorhabdus;s__
c.bin.44	95.72	1.709	24676	4506027	d__Bacteria;p__Acidobacteriota;c__Acidobacteriae;o__UBA7541;f__UBA7541;g__Palsa-147;s__
c.bin.46	96.97	4.879	40313	10819985	d__Bacteria;p__Acidobacteriota;c__Acidobacteriae;o__Bryobacterales;f__Bryobacteraceae;g__Solibacter;s__
c.bin.50	91.83	4.071	13376	5572847	d__Bacteria;p__Proteobacteria;c__Gammaproteobacteria;o__Burkholderiales;f__Burkholderiaceae;g__Ramlibacter;s__
c.bin.53	92.3	4.558	69477	6363695	d__Bacteria;p__Acidobacteriota;c__Acidobacteriae;o__Acidobacteriales;f__Gp1-AA117;g__Gp1-AA17;s__
c.bin.56	93.29	1.149	27928	8209767	d__Bacteria;p__Planctomycetota;c__Planctomycetes;o__Planctomycetales;f__UBA10511;g__SIAF01;s__
c.bin.58	91.99	3.695	20646	3658260	d__Bacteria;p__Proteobacteria;c__Alphaproteobacteria;o__Micropepsales;f__Micropepsaceae;g__CAIYRG01;s__
c.bin.61	93.08	4.029	42032	6849793	d__Bacteria;p__Gemmatimonadota;c__Gemmatimonadetes;o__Gemmatimonadales;f__Gemmatimonadaceae;g__AG2;s__
c.bin.62	93.48	1.424	43512	3916902	d__Bacteria;p__Proteobacteria;c__Alphaproteobacteria;o__Rhizobiales;f__Xanthobacteraceae;g__Pseudolabrys;s__
c.bin.67	98.85	1.724	213780	6308553	d__Bacteria;p__Bacteroidota;c__Bacteroidia;o__Chitinophagales;f__Chitinophagaceae;g__Puia;s__
c.bin.73	92.3	1.098	22025	2550202	d__Bacteria;p__Eisenbacteria;c__RBG-16-71-46;o__SZUA-252;f__SZUA-252;g__WS-9;s__
c.bin.8	95.16	0	98358	1105247	d__Bacteria;p__Proteobacteria;c__Alphaproteobacteria;o__WRAU01;f__;g__;s__
c.bin.80	93.08	4.558	72946	5915110	d__Bacteria;p__Acidobacteriota;c__Thermoanaerobaculia;o__Gp7-AA8;f__Gp7-AA8;g__;s__
c.bin.81	95.47	4.393	43946	4667883	d__Bacteria;p__Proteobacteria;c__Gammaproteobacteria;o__Steroidobacterales;f__Steroidobacteraceae;g__;s__
c.bin.83	93.87	4.202	61625	4275604	d__Bacteria;p__Proteobacteria;c__Gammaproteobacteria;o__Steroidobacterales;f__Steroidobacteraceae;g__Bog-1198;s__
c.bin.87	91.01	2.168	17086	7981808	d__Bacteria;p__Myxococcota;c__Polyangia;o__Polyangiales;f__Polyangiaceae;g__;s__
c.bin.9	97.23	2.873	125289	6340314	d__Bacteria;p__Proteobacteria;c__Gammaproteobacteria;o__Burkholderiales;f__Burkholderiaceae;g__Rhodoferax;s__
c.bin.91	94.04	3.418	106814	8322299	d__Bacteria;p__Acidobacteriota;c__Blastocatellia;o__Pyrinomonadales;f__Pyrinomonadaceae;g__;s__
c.bin.96	95.28	2.788	72882	8548656	d__Bacteria;p__Acidobacteriota;c__Thermoanaerobaculia;o__UBA5704;f__UBA5704;g__UBA5704;s__
c.bin.1	87.43	1.824	7151	3165243	d__Bacteria;p__Verrucomicrobiota;c__Verrucomicrobiae;o__Pedosphaerales;f__UBA11358;g__;s__
c.bin.100	77.98	0.397	10955	3308044	d__Bacteria;p__Actinobacteriota;c__Actinomycetia;o__Propionibacteriales;f__Nocardioidaceae;g__Nocardioides;s__
c.bin.102	83.97	1.068	313878	4320802	d__Bacteria;p__Acidobacteriota;c__Acidobacteriae;o__Acidobacteriales;f__Koribacteraceae;g__Sulfotelmatobacter;s__
c.bin.104	79.58	3.296	14325	3797138	d__Bacteria;p__Gemmatimonadota;c__Gemmatimonadetes;o__Gemmatimonadales;f__Gemmatimonadaceae;g__Palsa-1248;s__
c.bin.106	70.51	3.22	4094	2950259	d__Bacteria;p__Proteobacteria;c__Gammaproteobacteria;o__Xanthomonadales;f__Rhodanobacteraceae;g__;s__
c.bin.108	89.39	0.85	11374	1690804	d__Bacteria;p__Chlamydiota;c__Chlamydiia;o__Chlamydiales;f__Rhabdochlamydiaceae;g__;s__
c.bin.11	89.01	1.282	11604	4000466	d__Bacteria;p__Actinobacteriota;c__Acidimicrobiia;o__Acidimicrobiales;f__Ilumatobacteraceae;g__;s__
c.bin.113	73.27	2.197	7257	2535593	d__Bacteria;p__Gemmatimonadota;c__Gemmatimonadetes;o__Gemmatimonadales;f__Gemmatimonadaceae;g__UBA4720;s__
c.bin.116	83.85	3.23	15182	3179740	d__Bacteria;p__Proteobacteria;c__Gammaproteobacteria;o__Steroidobacterales;f__Steroidobacteraceae;g__13-2-20CM-66-19;s__
c.bin.117	73.62	1.724	30529	6772022	d__Bacteria;p__Proteobacteria;c__Alphaproteobacteria;o__Rhizobiales;f__Xanthobacteraceae;g__P52-10;s__
c.bin.118	88.88	2.969	16952	2875983	d__Bacteria;p__Proteobacteria;c__Gammaproteobacteria;o__Nevskiales;f__Nevskiaceae;g__;s__
c.bin.12	70.49	0	10612	3108353	d__Bacteria;p__Eisenbacteria;c__RBG-16-71-46;o__RBG-16-71-46;f__RBG-16-71-46;g__;s__
c.bin.120	89.07	1.709	273244	5133182	d__Bacteria;p__Acidobacteriota;c__Acidobacteriae;o__UBA7541;f__UBA7541;g__UBA7541;s__
c.bin.122	71.54	1.709	11976	4440681	d__Bacteria;p__Acidobacteriota;c__Mor1;o__Mor1;f__;g__;s__
c.bin.123	70.48	2.212	4162	1558795	d__Bacteria;p__Proteobacteria;c__Gammaproteobacteria;o__Coxiellales;f__Coxiellaceae;g__;s__
c.bin.126	76.17	1.648	4357	1633567	d__Bacteria;p__Zixibacteria;c__MSB-5A5;o__DSPP01;f__DSPP01;g__DSPP01;s__
c.bin.127	85.51	3.418	31226	4022920	d__Bacteria;p__Acidobacteriota;c__Acidobacteriae;o__UBA7541;f__UBA7541;g__UBA7541;s__
c.bin.128	89.12	4.444	26755	3024435	d__Bacteria;p__Acidobacteriota;c__Mor1;o__Mor1;f__;g__;s__
c.bin.129	83.99	1.956	17943	3539922	d__Bacteria;p__Proteobacteria;c__Alphaproteobacteria;o__Micropepsales;f__Micropepsaceae;g__Rhizomicrobium;s__
c.bin.132	75.46	2.197	10060	2846714	d__Bacteria;p__Gemmatimonadota;c__Gemmatimonadetes;o__Gemmatimonadales;f__Gemmatimonadaceae;g__UBA4720;s__
c.bin.135	84.68	4.558	21712	8157404	d__Bacteria;p__Acidobacteriota;c__Blastocatellia;o__UBA7656;f__UBA7656;g__UBA7656;s__
c.bin.136	70.17	1.724	18031	4977469	d__Bacteria;p__Acidobacteriota;c__Acidobacteriae;o__Acidobacteriales;f__Koribacteraceae;g__;s__
c.bin.137	80.58	3.296	10136	2673568	d__Bacteria;p__Gemmatimonadota;c__Gemmatimonadetes;o__Gemmatimonadales;f__GWC2-71-9;g__;s__
c.bin.139	82.76	3.211	14688	3143422	d__Bacteria;p__Chloroflexota;c__Ellin6529;o__CSP1-4;f__CSP1-4;g__C-114;s__
c.bin.14	71.7	4.31	7116	7246630	d__Bacteria;p__Gemmatimonadota;c__Gemmatimonadetes;o__Gemmatimonadales;f__Gemmatimonadaceae;g__AG2;s__
c.bin.140	71.53	4.621	6356	3635816	d__Bacteria;p__Proteobacteria;c__Alphaproteobacteria;o__Rhizobiales;f__Xanthobacteraceae;g__Bradyrhizobium;s__
c.bin.143	77.97	2.588	5425	3851496	d__Bacteria;p__Proteobacteria;c__Gammaproteobacteria;o__Steroidobacterales;f__Steroidobacteraceae;g__Povalibacter;s__
c.bin.145	76.25	0.742	6318	2863095	d__Bacteria;p__Bacteroidota;c__Bacteroidia;o__Chitinophagales;f__Chitinophagaceae;g__;s__
c.bin.146	89.48	3.409	9768	3617194	d__Bacteria;p__Planctomycetota;c__Phycisphaerae;o__Phycisphaerales;f__SM1A02;g__;s__
c.bin.147	79.76	2.188	10166	2351170	d__Bacteria;p__Proteobacteria;c__Alphaproteobacteria;o__Micropepsales;f__Micropepsaceae;g__Rhizomicrobium;s__
c.bin.148	82.05	3.846	16441	4135199	d__Bacteria;p__Gemmatimonadota;c__Gemmatimonadetes;o__Gemmatimonadales;f__GWC2-71-9;g__JACDDX01;s__
c.bin.15	81.06	2.838	9500	3903429	d__Bacteria;p__Proteobacteria;c__Alphaproteobacteria;o__Rhizobiales;f__Beijerinckiaceae;g__Roseiarcus;s__
c.bin.150	82.71	1.075	15636	5049555	d__Bacteria;p__Planctomycetota;c__UBA1135;o__UBA1135;f__GCA-002686595;g__;s__
c.bin.151	82.58	4.193	6022	4307273	d__Bacteria;p__Desulfobacterota_B;c__Binatia;o__UBA9968;f__UBA9968;g__DP-20;s__
c.bin.154	81.33	1.724	16527	3955036	d__Bacteria;p__Proteobacteria;c__Gammaproteobacteria;o__Xanthomonadales;f__Rhodanobacteraceae;g__;s__
c.bin.155	73.51	1.677	6478	2729259	d__Bacteria;p__Proteobacteria;c__Gammaproteobacteria;o__Burkholderiales;f__SG8-39;g__SCGC-AG-212-J23;s__
c.bin.157	89.54	4.729	12330	2687794	d__Bacteria;p__Verrucomicrobiota;c__Verrucomicrobiae;o__Chthoniobacterales;f__UBA10450;g__AV40;s__
c.bin.16	78.55	2.378	4714	3660025	d__Bacteria;p__Chloroflexota;c__Dehalococcoidia;o__UBA2991;f__UBA2991;g__PNKC01;s__
c.bin.161	87.98	3.807	16898	2526831	d__Bacteria;p__Actinobacteriota;c__Thermoleophilia;o__Solirubrobacterales;f__70-9;g__;s__
c.bin.162	89.18	4.467	11961	3587438	d__Bacteria;p__Proteobacteria;c__Gammaproteobacteria;o__Steroidobacterales;f__Steroidobacteraceae;g__;s__
c.bin.163	85	4.391	10691	6141774	d__Bacteria;p__Verrucomicrobiota;c__Verrucomicrobiae;o__Pedosphaerales;f__UBA8199;g__PSRM01;s__
c.bin.165	72.71	0	7422	789726	d__Bacteria;p__Patescibacteria;c__Paceibacteria;o__UBA9983_A;f__GCA-2401445;g__;s__
c.bin.167	83.06	2.84	47471	6712886	d__Bacteria;p__Planctomycetota;c__MHYJ01;o__MHYJ01;f__MHYJ01;g__;s__
c.bin.174	84.12	3.448	38427	8273462	d__Bacteria;p__Acidobacteriota;c__Vicinamibacteria;o__Vicinamibacterales;f__2-12-FULL-66-21;g__QHWT01;s__
c.bin.175	80.57	1.841	5924	2766609	d__Bacteria;p__Verrucomicrobiota;c__Verrucomicrobiae;o__Palsa-1439;f__Palsa-1439;g__CAINDI01;s__
c.bin.177	74.29	2.172	12859	2778764	d__Bacteria;p__Proteobacteria;c__Gammaproteobacteria;o__Burkholderiales;f__SG8-39;g__VBDM01;s__
c.bin.178	74.41	1.88	13144	5262518	d__Bacteria;p__Acidobacteriota;c__Acidobacteriae;o__Acidobacteriales;f__Koribacteraceae;g__JABCYV01;s__
c.bin.179	76.7	4.301	11061	5843867	d__Bacteria;p__Myxococcota;c__Polyangia;o__Polyangiales;f__;g__;s__
c.bin.18	73.25	4.621	3478	1988338	d__Bacteria;p__Nitrospirota;c__Nitrospiria;o__Nitrospirales;f__Nitrospiraceae;g__Nitrospira_C;s__
c.bin.180	81.15	4.7	12956	2744410	d__Bacteria;p__Actinobacteriota;c__UBA4738;o__UBA4738;f__HRBIN12;g__;s__
c.bin.181	74.63	1.422	6768	2241306	d__Bacteria;p__Proteobacteria;c__Gammaproteobacteria;o__Steroidobacterales;f__Steroidobacteraceae;g__FEN-1191;s__
c.bin.183	84.04	4.604	18266	4623459	d__Bacteria;p__Methylomirabilota;c__Methylomirabilia;o__Rokubacteriales;f__GWA2-73-35;g__;s__
c.bin.187	77.58	0.689	8398	2370423	d__Bacteria;p__Acidobacteriota;c__Thermoanaerobaculia;o__UBA5066;f__Gp7-AA6;g__;s__
c.bin.189	77.06	2.329	13204	2571194	d__Bacteria;p__Nitrospirota;c__Nitrospiria;o__Nitrospirales;f__Nitrospiraceae;g__Palsa-1315;s__
c.bin.190	72.66	0.422	6704	1937843	d__Bacteria;p__Proteobacteria;c__Alphaproteobacteria;o__Rhizobiales;f__Xanthobacteraceae;g__Palsa-892;s__
c.bin.193	78.01	0.71	11311	3748677	d__Bacteria;p__Proteobacteria;c__Gammaproteobacteria;o__Burkholderiales;f__SG8-39;g__SCGC-AG-212-J23;s__
c.bin.198	72.94	0.193	4195	2337589	d__Bacteria;p__Zixibacteria;c__MSB-5A5;o__GN15;f__FEB-12;g__;s__
c.bin.199	87.91	4.395	30299	3920834	d__Bacteria;p__Gemmatimonadota;c__Gemmatimonadetes;o__Gemmatimonadales;f__GWC2-71-9;g__;s__
c.bin.20	81.29	3.017	9470	3003124	d__Bacteria;p__Actinobacteriota;c__Thermoleophilia;o__Gaiellales;f__Gaiellaceae;g__PALSA-612;s__
c.bin.204	77.57	3.923	6145	1956813	d__Bacteria;p__Proteobacteria;c__Gammaproteobacteria;o__Xanthomonadales;f__Xanthomonadaceae;g__Lysobacter_C;s__
c.bin.205	82.52	0.97	7577	1074004	d__Archaea;p__Thermoproteota;c__Nitrososphaeria;o__Nitrososphaerales;f__Nitrosopumilaceae;g__Nitrosotalea;s__
c.bin.206	72.41	2.586	15131	6130080	d__Bacteria;p__Acidobacteriota;c__Vicinamibacteria;o__Vicinamibacterales;f__2-12-FULL-66-21;g__;s__
c.bin.210	83.48	3.61	6875	3081827	d__Bacteria;p__Proteobacteria;c__Gammaproteobacteria;o__Burkholderiales;f__UKL13-2;g__GR16-43;s__
c.bin.211	70.81	1.6	4734	1344954	d__Archaea;p__Thermoplasmatota;c__SW-10-69-26;o__;f__;g__;s__
c.bin.212	81.08	2.991	27928	3539875	d__Bacteria;p__Acidobacteriota;c__Acidobacteriae;o__UBA7541;f__UBA7541;g__UBA7541;s__
c.bin.214	80.55	2.591	6534	2871342	d__Bacteria;p__Proteobacteria;c__Alphaproteobacteria;o__Caulobacterales;f__Hyphomonadaceae;g__Terricaulis;s__
c.bin.215	81.58	3.888	14346	3792611	d__Bacteria;p__Dormibacterota;c__Dormibacteria;o__Dormibacterales;f__Dormibacteraceae;g__Palsa-872;s__
c.bin.219	87.39	2.849	27619	7076932	d__Bacteria;p__Acidobacteriota;c__Thermoanaerobaculia;o__Gp7-AA8;f__Gp7-AA8;g__;s__
c.bin.220	72	4.829	10437	3389410	d__Bacteria;p__Desulfobacterota_B;c__Binatia;o__UBA9968;f__UBA9968;g__DP-20;s__
c.bin.221	78.11	0	6615	3137290	d__Bacteria;p__Bacteroidota;c__Bacteroidia;o__Chitinophagales;f__Chitinophagaceae;g__;s__
c.bin.223	77.35	1.754	12006	4534239	d__Bacteria;p__Planctomycetota;c__UBA1135;o__UBA2386;f__UBA2386;g__;s__
c.bin.224	86.03	1.263	8690	3574885	d__Bacteria;p__Gemmatimonadota;c__Gemmatimonadetes;o__Gemmatimonadales;f__Gemmatimonadaceae;g__;s__
c.bin.227	86.77	4.539	11288	8581916	d__Bacteria;p__Myxococcota;c__Polyangia;o__;f__;g__;s__
c.bin.229	85.37	1.304	14188	3399925	d__Bacteria;p__Proteobacteria;c__Alphaproteobacteria;o__Sphingomonadales;f__Sphingomonadaceae;g__Allosphingosinicella;s__
c.bin.232	85.37	1.599	10329	3571707	d__Bacteria;p__Proteobacteria;c__Gammaproteobacteria;o__Burkholderiales;f__SG8-39;g__;s__
c.bin.233	88.6	3.418	9939	5833909	d__Bacteria;p__Acidobacteriota;c__Blastocatellia;o__UBA7656;f__UBA7656;g__;s__
c.bin.235	79.12	0	26346	3496985	d__Bacteria;p__Nitrospirota;c__Nitrospiria;o__Nitrospirales;f__Nitrospiraceae;g__Palsa-1315;s__
c.bin.237	73.2	2.747	20421	3106868	d__Bacteria;p__Gemmatimonadota;c__Gemmatimonadetes;o__Gemmatimonadales;f__Gemmatimonadaceae;g__Fen-1231;s__
c.bin.238	77.58	1.648	22164	2647319	d__Bacteria;p__Gemmatimonadota;c__Gemmatimonadetes;o__Gemmatimonadales;f__GWC2-71-9;g__20CM-2-65-7;s__
c.bin.239	72.42	2.693	7945	5255243	d__Bacteria;p__Methylomirabilota;c__Methylomirabilia;o__Rokubacteriales;f__;g__;s__
c.bin.24	89.41	3.746	16695	3603907	d__Bacteria;p__Proteobacteria;c__Gammaproteobacteria;o__Pseudomonadales;f__;g__;s__
c.bin.240	83.79	3.76	10673	3313908	d__Bacteria;p__Proteobacteria;c__Alphaproteobacteria;o__Caulobacterales;f__Hyphomonadaceae;g__Terricaulis;s__
c.bin.241	81.86	0.632	24193	3648445	d__Bacteria;p__Proteobacteria;c__Alphaproteobacteria;o__Rhizobiales;f__Xanthobacteraceae;g__Pseudolabrys;s__
c.bin.243	78.12	2.641	7050	5587035	d__Bacteria;p__Actinobacteriota;c__Actinomycetia;o__Mycobacteriales;f__Frankiaceae;g__;s__
c.bin.244	85.25	1.991	14834	2168891	d__Bacteria;p__Proteobacteria;c__Alphaproteobacteria;o__Sphingomonadales;f__Sphingomonadaceae;g__Sphingomicrobium;s__
c.bin.247	76.55	3.828	9206	4853915	d__Bacteria;p__Proteobacteria;c__Gammaproteobacteria;o__UBA6522;f__UBA6522;g__;s__
c.bin.248	79.46	4.207	4921	1698167	d__Archaea;p__Thermoproteota;c__Nitrososphaeria;o__Nitrososphaerales;f__Nitrososphaeraceae;g__TA-21;s__
c.bin.25	74.13	0.862	6720	3111592	d__Bacteria;p__Eisenbacteria;c__RBG-16-71-46;o__RBG-16-71-46;f__RBG-16-71-46;g__WS-11;s__
c.bin.257	71.73	2.215	27348	2334290	d__Bacteria;p__Proteobacteria;c__Alphaproteobacteria;o__Rhizobiales;f__Xanthobacteraceae;g__Pseudolabrys;s__
c.bin.26	86.84	1.315	18043	6169768	d__Bacteria;p__Acidobacteriota;c__Acidobacteriae;o__Bryobacterales;f__Bryobacteraceae;g__PALSA-243;s__
c.bin.260	71.36	2.732	6298	2651082	d__Bacteria;p__Bacteroidota;c__Ignavibacteria;o__SJA-28;f__OLB5;g__;s__
c.bin.264	81.35	4.444	10542	5233983	d__Bacteria;p__Acidobacteriota;c__Vicinamibacteria;o__Fen-336;f__Fen-336;g__;s__
c.bin.265	87.34	1.739	16776	5681385	d__Bacteria;p__Acidobacteriota;c__Acidobacteriae;o__Bryobacterales;f__Bryobacteraceae;g__Palsa-187;s__
c.bin.266	81.2	2.564	49156	5044494	d__Bacteria;p__Acidobacteriota;c__Vicinamibacteria;o__Vicinamibacterales;f__UBA2999;g__;s__
c.bin.267	83.13	2.299	20998	2245631	d__Bacteria;p__Proteobacteria;c__Alphaproteobacteria;o__Caulobacterales;f__Caulobacteraceae;g__NCED01;s__
c.bin.273	74.07	3.472	8678	4540308	d__Bacteria;p__Acidobacteriota;c__Blastocatellia;o__Pyrinomonadales;f__Pyrinomonadaceae;g__UBA11740;s__
c.bin.277	82.51	4.797	5804	3292070	d__Bacteria;p__Proteobacteria;c__Alphaproteobacteria;o__Rhizobiales;f__Rhizobiaceae;g__BGMRC6574;s__
c.bin.279	73.36	2.564	11257	3797684	d__Bacteria;p__Acidobacteriota;c__Thermoanaerobaculia;o__UBA5066;f__Gp7-AA6;g__;s__
c.bin.281	75.31	2.376	5474	3612925	d__Bacteria;p__Planctomycetota;c__Phycisphaerae;o__Phycisphaerales;f__SM1A02;g__;s__
c.bin.284	86.08	4.273	34807	3928220	d__Bacteria;p__Acidobacteriota;c__Acidobacteriae;o__Acidobacteriales;f__Koribacteraceae;g__JABCZH01;s__
c.bin.285	84.7	2.805	16483	2495379	d__Bacteria;p__Chloroflexota;c__Ellin6529;o__P2-11E;f__P2-11E;g__3-1-20CM-2-70-9;s__
c.bin.291	79.72	2.979	10395	4359930	d__Bacteria;p__Proteobacteria;c__Alphaproteobacteria;o__Rhizobiales;f__Xanthobacteraceae;g__BOG-931;s__
c.bin.293	88.55	3.532	11049	4734245	d__Bacteria;p__Acidobacteriota;c__Acidobacteriae;o__Bryobacterales;f__Bryobacteraceae;g__Palsa-89;s__
c.bin.295	79.84	2.464	10786	4451756	d__Bacteria;p__Bacteroidota;c__Bacteroidia;o__Chitinophagales;f__Chitinophagaceae;g__;s__
c.bin.297	70.25	3.304	6925	1849401	d__Bacteria;p__Actinobacteriota;c__Thermoleophilia;o__Gaiellales;f__Gaiellaceae;g__JACCRW01;s__
c.bin.3	88.4	1.2	14370	2634477	d__Archaea;p__Thermoplasmatota;c__Thermoplasmata;o__DTKX01;f__;g__;s__
c.bin.30	71.85	1.638	6659	1569843	d__Bacteria;p__Proteobacteria;c__Gammaproteobacteria;o__Burkholderiales;f__Burkholderiaceae;g__SCTK01;s__
c.bin.36	78.31	1.889	5382	1881376	d__Bacteria;p__Elusimicrobiota;c__Elusimicrobia;o__2-01-FULL-59-12;f__;g__;s__
c.bin.39	86.51	0	1079808	1079808	d__Bacteria;p__Dependentiae;c__Babeliae;o__Babeliales;f__Vermiphilaceae;g__;s__
c.bin.41	77.21	4.46	4056	2950387	d__Bacteria;p__Gemmatimonadota;c__Gemmatimonadetes;o__Gemmatimonadales;f__GWC2-71-9;g__;s__
c.bin.43	72.38	4.454	4929	3189771	d__Bacteria;p__Actinobacteriota;c__Thermoleophilia;o__Gaiellales;f__;g__;s__
c.bin.45	83.33	2.741	11447	7722179	d__Bacteria;p__Myxococcota;c__Polyangia;o__Haliangiales;f__Haliangiaceae;g__;s__
c.bin.47	80.78	2.991	6961	3659888	d__Bacteria;p__Acidobacteriota;c__Acidobacteriae;o__UBA7541;f__UBA7541;g__UBA7541;s__
c.bin.48	71.56	4.458	6075	3842289	d__Bacteria;p__Actinobacteriota;c__Thermoleophilia;o__Solirubrobacterales;f__Solirubrobacteraceae;g__;s__
c.bin.49	84.75	2.75	10503	7884980	d__Bacteria;p__Actinobacteriota;c__Actinomycetia;o__Streptosporangiales;f__Streptosporangiaceae;g__Palsa-504;s__
c.bin.51	71.18	2.991	7966	3209844	d__Bacteria;p__Acidobacteriota;c__Thermoanaerobaculia;o__UBA5066;f__Gp7-AA6;g__;s__
c.bin.57	77.84	2.297	9247	2273701	d__Bacteria;p__Gemmatimonadota;c__Gemmatimonadetes;o__Gemmatimonadales;f__GWC2-71-9;g__;s__
c.bin.59	76.76	2.004	10018	5654211	d__Bacteria;p__Methylomirabilota;c__Methylomirabilia;o__Rokubacteriales;f__;g__;s__
c.bin.63	87.52	2.777	10712	2463351	d__Bacteria;p__Nitrospirota;c__Nitrospiria;o__;f__;g__;s__
c.bin.68	76.48	2.5	8050	5322230	d__Bacteria;p__Actinobacteriota;c__Actinomycetia;o__Mycobacteriales;f__Micromonosporaceae;g__Actinoplanes;s__
c.bin.69	76.33	4.395	36031	3210683	d__Bacteria;p__Gemmatimonadota;c__Gemmatimonadetes;o__Gemmatimonadales;f__GWC2-71-9;g__JACDDX01;s__
c.bin.7	70.5	0	14041	579483	d__Bacteria;p__Patescibacteria;c__Paceibacteria;o__UBA9983_A;f__UBA2163;g__GWA1-54-10;s__
c.bin.71	74.87	4.673	8678	4145796	d__Bacteria;p__Proteobacteria;c__Gammaproteobacteria;o__Steroidobacterales;f__Steroidobacteraceae;g__PALSA-1196;s__
c.bin.72	76.99	4.901	7203	4602873	d__Bacteria;p__Proteobacteria;c__Alphaproteobacteria;o__Rhizobiales;f__Xanthobacteraceae;g__Bradyrhizobium;s__
c.bin.74	87.79	1.687	44327	3604262	d__Bacteria;p__Proteobacteria;c__Alphaproteobacteria;o__Rhizobiales;f__Xanthobacteraceae;g__Pseudolabrys;s__
c.bin.75	84.32	1.098	65266	2895858	d__Bacteria;p__Eisenbacteria;c__RBG-16-71-46;o__SZUA-252;f__SZUA-252;g__WS-9;s__
c.bin.76	87.26	3.589	8687	4104527	d__Bacteria;p__Acidobacteriota;c__Thermoanaerobaculia;o__Gp7-AA8;f__Gp7-AA8;g__Gp7-AA10;s__
c.bin.77	86.04	2.728	33476	3337159	d__Bacteria;p__Proteobacteria;c__Alphaproteobacteria;o__Rhizobiales;f__Xanthobacteraceae;g__Pseudolabrys;s__
c.bin.78	83.8	0.985	8866	4176239	d__Bacteria;p__Bacteroidota;c__Bacteroidia;o__Chitinophagales;f__Chitinophagaceae;g__VBAT01;s__
c.bin.79	77.42	4.558	11709	2385865	d__Bacteria;p__Actinobacteriota;c__UBA4738;o__UBA4738;f__HRBIN12;g__;s__
c.bin.82	76.58	2.052	7726	3398649	d__Bacteria;p__Proteobacteria;c__Alphaproteobacteria;o__Dongiales;f__Dongiaceae;g__;s__
c.bin.85	84.9	1.27	10692	3999310	d__Bacteria;p__Bacteroidota;c__Bacteroidia;o__Chitinophagales;f__Saprospiraceae;g__;s__
c.bin.86	87.48	4.056	15844	3069469	d__Bacteria;p__Proteobacteria;c__Gammaproteobacteria;o__Burkholderiales;f__SG8-39;g__SCGC-AG-212-J23;s__
c.bin.88	84.36	3.846	7222	3426476	d__Bacteria;p__Actinobacteriota;c__Acidimicrobiia;o__Acidimicrobiales;f__Ilumatobacteraceae;g__;s__
c.bin.90	73.79	0	7783	3080689	d__Bacteria;p__Actinobacteriota;c__Acidimicrobiia;o__Acidimicrobiales;f__JACDCH01;g__;s__
c.bin.92	80.43	0.276	7687	4825730	d__Bacteria;p__Planctomycetota;c__UBA1135;o__UBA1135;f__GCA-002686595;g__;s__
c.bin.93	89.79	2.911	16002	2694770	d__Bacteria;p__Proteobacteria;c__Alphaproteobacteria;o__Rhizobiales;f__Xanthobacteraceae;g__Palsa-892;s__
c.bin.94	76.6	2.849	17360	5536670	d__Bacteria;p__Acidobacteriota;c__Vicinamibacteria;o__Fen-336;f__Fen-336;g__;s__
c.bin.95	70.83	1.298	7805	2849499	d__Bacteria;p__Proteobacteria;c__Alphaproteobacteria;o__Caulobacterales;f__Hyphomonadaceae;g__;s__
c.bin.97	83.51	2.327	11727	2562252	d__Bacteria;p__Gemmatimonadota;c__Gemmatimonadetes;o__Gemmatimonadales;f__GWC2-71-9;g__;s__
c.bin.98	78.6	2.197	7613	3269853	d__Bacteria;p__Gemmatimonadota;c__Gemmatimonadetes;o__Gemmatimonadales;f__GWC2-71-9;g__JACDDX01;s__
c.bin.13	94.81	9.401	26381	11259355	d__Bacteria;p__Acidobacteriota;c__Blastocatellia;o__UBA7656;f__UBA7656;g__;s__
c.bin.169	90.58	5.677	20259	4103374	d__Bacteria;p__Gemmatimonadota;c__Gemmatimonadetes;o__Gemmatimonadales;f__GWC2-71-9;g__SHZT01;s__
c.bin.170	91.44	7.05	25585	4220609	d__Bacteria;p__Proteobacteria;c__Gammaproteobacteria;o__Burkholderiales;f__Rhodocyclaceae;g__;s__
c.bin.176	90.07	6.267	21732	5875990	d__Bacteria;p__Acidobacteriota;c__Vicinamibacteria;o__Vicinamibacterales;f__UBA2999;g__2-02-FULL-65-29;s__
c.bin.203	90.64	6.41	24954	5979479	d__Bacteria;p__Acidobacteriota;c__Vicinamibacteria;o__Vicinamibacterales;f__UBA2999;g__Gp6-AA45;s__
c.bin.23	98.64	7.905	36692	8254279	d__Bacteria;p__Verrucomicrobiota;c__Verrucomicrobiae;o__Pedosphaerales;f__SIBH01;g__;s__
c.bin.236	96.25	8.826	37109	7660436	d__Bacteria;p__Planctomycetota;c__MHYJ01;o__MHYJ01;f__MHYJ01;g__;s__
c.bin.254	96.48	7.927	112662	7728812	d__Bacteria;p__Verrucomicrobiota;c__Verrucomicrobiae;o__Pedosphaerales;f__UBA8199;g__;s__
c.bin.255	96.19	5.585	65013	5118800	d__Bacteria;p__Proteobacteria;c__Gammaproteobacteria;o__Steroidobacterales;f__Steroidobacteraceae;g__;s__
c.bin.278	95.54	6.081	45373	3328154	d__Bacteria;p__Verrucomicrobiota;c__Verrucomicrobiae;o__Chthoniobacterales;f__UBA10450;g__;s__
c.bin.294	95.24	5.54	32799	7001713	d__Bacteria;p__Verrucomicrobiota;c__Verrucomicrobiae;o__Pedosphaerales;f__UBA8199;g__PSRM01;s__
c.bin.42	96.58	5.128	125480	4476606	d__Bacteria;p__Acidobacteriota;c__Mor1;o__Mor1;f__;g__;s__
c.bin.54	97.43	7.692	172607	8235054	d__Bacteria;p__Acidobacteriota;c__Blastocatellia;o__UBA7656;f__UBA7656;g__;s__
c.bin.6	91.79	5.148	20905	5690717	d__Bacteria;p__Verrucomicrobiota;c__Verrucomicrobiae;o__Pedosphaerales;f__UBA3939;g__;s__
c.bin.64	91.19	5.32	38434	6569256	d__Bacteria;p__Planctomycetota;c__MHYJ01;o__MHYJ01;f__;g__;s__
c.bin.65	98.29	5.175	141202	5569881	d__Bacteria;p__Acidobacteriota;c__Blastocatellia;o__Pyrinomonadales;f__Pyrinomonadaceae;g__JACVRN01;s__
c.bin.66	93.63	5.181	22115	5109618	d__Bacteria;p__Acidobacteriota;c__Blastocatellia;o__Pyrinomonadales;f__Pyrinomonadaceae;g__QHXM01;s__
c.bin.84	91.44	6.818	38406	6984305	d__Bacteria;p__Planctomycetota;c__Phycisphaerae;o__UBA1161;f__UBA1161;g__DTNO01;s__
c.bin.101	72.18	5.483	4110	4285995	d__Bacteria;p__Actinobacteriota;c__Actinomycetia;o__Propionibacteriales;f__Propionibacteriaceae;g__;s__
c.bin.107	87.92	7.312	10440	6307323	d__Bacteria;p__Acidobacteriota;c__Blastocatellia;o__Pyrinomonadales;f__Pyrinomonadaceae;g__PSRF01;s__
c.bin.109	79.26	5.389	7834	5551139	d__Bacteria;p__Acidobacteriota;c__Blastocatellia;o__Pyrinomonadales;f__Pyrinomonadaceae;g__UBA11740;s__
c.bin.112	79.1	8.689	6418	4816379	d__Bacteria;p__Acidobacteriota;c__Acidobacteriae;o__UBA7541;f__UBA7541;g__UBA7541;s__
c.bin.130	81.82	6.818	7448	5129877	d__Bacteria;p__Planctomycetota;c__MHYJ01;o__MHYJ01;f__;g__;s__
c.bin.141	75.29	5.949	6353	6421407	d__Bacteria;p__Planctomycetota;c__Planctomycetes;o__Pirellulales;f__Pirellulaceae;g__ETA-A8;s__
c.bin.144	81.03	8.62	20897	3482918	d__Bacteria;p__Proteobacteria;c__Gammaproteobacteria;o__Burkholderiales;f__Casimicrobiaceae;g__VBCG01;s__
c.bin.158	82.21	6.552	9708	4452661	d__Bacteria;p__Acidobacteriota;c__Acidobacteriae;o__Acidobacteriales;f__Koribacteraceae;g__;s__
c.bin.166	78.52	5.899	6876	4586156	d__Bacteria;p__Bacteroidota;c__Bacteroidia;o__Chitinophagales;f__Chitinophagaceae;g__VBAT01;s__
c.bin.168	83.41	5.681	12057	6051484	d__Bacteria;p__Planctomycetota;c__MHYJ01;o__MHYJ01;f__MHYJ01;g__;s__
c.bin.17	70.98	8.62	6947	6593625	d__Bacteria;p__Proteobacteria;c__Gammaproteobacteria;o__Nevskiales;f__Nevskiaceae;g__Nevskia;s__
c.bin.172	76.79	7.336	10456	3670274	d__Bacteria;p__Nitrospirota;c__Nitrospiria;o__Nitrospirales;f__Nitrospiraceae;g__Palsa-1315;s__
c.bin.182	71.31	8.831	4074	4776098	d__Bacteria;p__Acidobacteriota;c__Vicinamibacteria;o__Fen-336;f__Fen-336;g__;s__
c.bin.185	87.46	7.175	8639	4922722	d__Bacteria;p__Acidobacteriota;c__Thermoanaerobaculia;o__UBA5066;f__Gp7-AA6;g__;s__
c.bin.186	76.42	5.074	5176	4223640	d__Bacteria;p__Acidobacteriota;c__Acidobacteriae;o__Acidobacteriales;f__Koribacteraceae;g__Sulfotelmatobacter;s__
c.bin.19	74.48	6.034	11715	4357790	d__Bacteria;p__Proteobacteria;c__Gammaproteobacteria;o__Steroidobacterales;f__Steroidobacteraceae;g__CADEED01;s__
c.bin.191	86.59	5.747	9836	6981340	d__Bacteria;p__Planctomycetota;c__Planctomycetes;o__Pirellulales;f__Pirellulaceae;g__ETA-A8;s__
c.bin.192	89.03	9.537	8884	6772381	d__Bacteria;p__Myxococcota;c__Polyangia;o__Palsa-1104;f__Fen-1088;g__;s__
c.bin.195	73.59	6.068	5347	4771101	d__Bacteria;p__Acidobacteriota;c__Vicinamibacteria;o__Fen-336;f__Fen-336;g__;s__
c.bin.196	88.31	5.405	8620	6934435	d__Bacteria;p__Acidobacteriota;c__Vicinamibacteria;o__Vicinamibacterales;f__UBA2999;g__Gp6-AA45;s__
c.bin.200	89.66	5.741	11704	4939421	d__Bacteria;p__Bacteroidota;c__Bacteroidia;o__Chitinophagales;f__UBA10324;g__;s__
c.bin.201	84.58	7.751	6596	3458546	d__Bacteria;p__Proteobacteria;c__Gammaproteobacteria;o__Nevskiales;f__Nevskiaceae;g__;s__
c.bin.202	86.53	5.69	21186	6601102	d__Bacteria;p__Methylomirabilota;c__Methylomirabilia;o__Rokubacteriales;f__GWA2-73-35;g__AR5;s__
c.bin.207	79.54	5.035	7123	3505372	d__Bacteria;p__Proteobacteria;c__Alphaproteobacteria;o__Rhizobiales;f__Xanthobacteraceae;g__Bradyrhizobium;s__
c.bin.21	73.74	9.435	11424	5633010	d__Bacteria;p__Acidobacteriota;c__Vicinamibacteria;o__Vicinamibacterales;f__UBA2999;g__Gp6-AA40;s__
c.bin.216	77.15	7.83	4159	6653148	d__Bacteria;p__Actinobacteriota;c__Actinomycetia;o__Streptosporangiales;f__Streptosporangiaceae;g__UBA9676;s__
c.bin.218	78.83	5.673	6769	3899035	d__Bacteria;p__Proteobacteria;c__Gammaproteobacteria;o__Steroidobacterales;f__Steroidobacteraceae;g__CADEED01;s__
c.bin.225	85.69	8.602	16244	6749704	d__Bacteria;p__Planctomycetota;c__MHYJ01;o__MHYJ01;f__MHYJ01;g__;s__
c.bin.226	89.08	6.321	7982	8788374	d__Bacteria;p__Planctomycetota;c__Planctomycetes;o__Planctomycetales;f__UBA10511;g__;s__
c.bin.231	79.26	8.612	9602	2702873	d__Bacteria;p__Chloroflexota;c__Dehalococcoidia;o__DSTF01;f__;g__;s__
c.bin.234	78.46	5.555	5382	5209433	d__Bacteria;p__Acidobacteriota;c__Thermoanaerobaculia;o__Gp7-AA8;f__Gp7-AA8;g__;s__
c.bin.242	70.51	5.419	5044	4730554	d__Bacteria;p__Actinobacteriota;c__Actinomycetia;o__Mycobacteriales;f__Pseudonocardiaceae;g__Pseudonocardia;s__
c.bin.251	74.44	8.743	5531	2377147	d__Bacteria;p__Bacteroidota;c__UBA10030;o__UBA10030;f__UBA6906;g__UBA11986;s__
c.bin.253	81.65	5.709	6340	2730854	d__Bacteria;p__Dormibacterota;c__Dormibacteria;o__Dormibacterales;f__Dormibacteraceae;g__Palsa-872;s__
c.bin.258	75.62	6.969	17540	3115925	d__Bacteria;p__Proteobacteria;c__Gammaproteobacteria;o__GCA-2729495;f__GCA-2729495;g__QUBU01;s__
c.bin.259	89.9	5.982	56492	6889007	d__Bacteria;p__Acidobacteriota;c__Vicinamibacteria;o__Vicinamibacterales;f__UBA2999;g__Gp6-AA45;s__
c.bin.263	85.52	5.982	11661	5044524	d__Bacteria;p__Acidobacteriota;c__Vicinamibacteria;o__Vicinamibacterales;f__SCN-69-37;g__;s__
c.bin.270	89.76	5.07	9423	4252988	d__Bacteria;p__Proteobacteria;c__Alphaproteobacteria;o__Caulobacterales;f__Caulobacteraceae;g__;s__
c.bin.271	75.68	6.896	15992	4151667	d__Bacteria;p__Proteobacteria;c__Gammaproteobacteria;o__Burkholderiales;f__Casimicrobiaceae;g__CAIWHR01;s__
c.bin.272	84.91	9.34	16878	3417523	d__Bacteria;p__Gemmatimonadota;c__Gemmatimonadetes;o__Gemmatimonadales;f__GWC2-71-9;g__;s__
c.bin.274	80.56	5.333	8179	3962127	d__Bacteria;p__Proteobacteria;c__Alphaproteobacteria;o__Sphingomonadales;f__Sphingomonadaceae;g__Novosphingobium;s__
c.bin.286	87.78	5.967	31690	8040718	d__Bacteria;p__Myxococcota;c__Polyangia;o__Polyangiales;f__Polyangiaceae;g__;s__
c.bin.290	70.47	9.829	5490	4281505	d__Bacteria;p__Acidobacteriota;c__Thermoanaerobaculia;o__UBA5066;f__Gp7-AA6;g__;s__
c.bin.32	76.33	5.191	7484	5848563	d__Bacteria;p__Chloroflexota;c__Anaerolineae;o__Anaerolineales;f__EnvOPS12;g__UBA12294;s__
c.bin.33	72.88	9.481	3823	1923188	d__Bacteria;p__Proteobacteria;c__Gammaproteobacteria;o__Burkholderiales;f__SG8-39;g__CAITSH01;s__
c.bin.38	87.36	6.036	17914	4365131	d__Bacteria;p__Acidobacteriota;c__Thermoanaerobaculia;o__UBA5066;f__Gp7-AA6;g__;s__
c.bin.40	87.88	5.088	33266	2959618	d__Bacteria;p__Proteobacteria;c__Alphaproteobacteria;o__Sphingomonadales;f__Sphingomonadaceae;g__Sphingomicrobium;s__
c.bin.5	79.31	8.181	11574	3844623	d__Bacteria;p__Nitrospirota;c__Nitrospiria;o__Nitrospirales;f__Nitrospiraceae;g__Palsa-1315;s__
c.bin.52	80.05	8.005	6873	4586062	d__Bacteria;p__Acidobacteriota;c__Vicinamibacteria;o__Fen-336;f__Fen-336;g__;s__
c.bin.55	74.27	5.579	8736	3491218	d__Bacteria;p__Proteobacteria;c__Alphaproteobacteria;o__Micavibrionales;f__UBA2020;g__UBA2020;s__
c.bin.60	74.55	9.677	3674	3788443	d__Bacteria;p__Planctomycetota;c__UBA1135;o__UBA1135;f__GCA-002686595;g__;s__
c.bin.70	77.96	7.024	8675	3506023	d__Bacteria;p__Gemmatimonadota;c__Gemmatimonadetes;o__Gemmatimonadales;f__GWC2-71-9;g__DSTP01;s__
c.bin.89	77.47	9.89	27248	5432372	d__Bacteria;p__Gemmatimonadota;c__Gemmatimonadetes;o__Gemmatimonadales;f__Gemmatimonadaceae;g__AG2;s__
c.bin.99	74.29	9.89	6871	3962472	d__Bacteria;p__Eisenbacteria;c__RBG-16-71-46;o__RBG-16-71-46;f__RBG-16-71-46;g__CADEFY01;s__

## Sheet: d-NTC_M26
bin	completeness	contamination	N50	size	classification
d.bin.104	93.25	3.673	9749	8332635	d__Bacteria;p__Actinobacteriota;c__Actinomycetia;o__Streptosporangiales;f__Streptosporangiaceae;g__Actinocorallia;s__
d.bin.105	94.45	1.463	53554	2184563	d__Bacteria;p__Proteobacteria;c__Alphaproteobacteria;o__Micropepsales;f__Micropepsaceae;g__;s__
d.bin.107	90.24	1.182	16571	4294902	d__Bacteria;p__Proteobacteria;c__Alphaproteobacteria;o__Sphingomonadales;f__Sphingomonadaceae;g__Novosphingobium;s__
d.bin.109	93.98	1.851	30602	2415571	d__Bacteria;p__Chloroflexota;c__Ellin6529;o__QHBO01;f__QHBO01;g__CF-82;s__
d.bin.110	97.43	2.991	15493	4692044	d__Bacteria;p__Actinobacteriota;c__Acidimicrobiia;o__Acidimicrobiales;f__Ilumatobacteraceae;g__;s__
d.bin.118	96.51	0.726	57045	2294958	d__Bacteria;p__Proteobacteria;c__Gammaproteobacteria;o__Coxiellales;f__Coxiellaceae;g__;s__
d.bin.123	92.21	3.577	33612	3813791	d__Bacteria;p__Proteobacteria;c__Gammaproteobacteria;o__Burkholderiales;f__Rhodocyclaceae;g__;s__
d.bin.124	90.59	2.136	12409	4044631	d__Bacteria;p__Actinobacteriota;c__Acidimicrobiia;o__Acidimicrobiales;f__Ilumatobacteraceae;g__;s__
d.bin.127	92.56	1.098	207216	2874773	d__Bacteria;p__Eisenbacteria;c__RBG-16-71-46;o__SZUA-252;f__SZUA-252;g__WS-9;s__
d.bin.134	97.17	0.579	145190	2949886	d__Bacteria;p__Proteobacteria;c__Alphaproteobacteria;o__Micropepsales;f__Micropepsaceae;g__Rhizomicrobium;s__
d.bin.137	95.32	1.258	47245	5001746	d__Bacteria;p__Bacteroidota;c__Bacteroidia;o__Chitinophagales;f__Chitinophagaceae;g__Puia;s__
d.bin.14	99.19	1.285	262704	6993104	d__Bacteria;p__Proteobacteria;c__Gammaproteobacteria;o__Burkholderiales;f__Burkholderiaceae;g__;s__
d.bin.140	90.55	3.418	33484	4925263	d__Bacteria;p__Acidobacteriota;c__Mor1;o__Mor1;f__;g__;s__
d.bin.144	99.14	0.854	104095	5045020	d__Bacteria;p__Acidobacteriota;c__Acidobacteriae;o__Acidobacteriales;f__Koribacteraceae;g__JABDBE01;s__
d.bin.154	99.76	3.751	97585	7833211	d__Bacteria;p__Acidobacteriota;c__Thermoanaerobaculia;o__Gp7-AA8;f__Gp7-AA8;g__;s__
d.bin.157	93.23	2.085	52688	3737851	d__Bacteria;p__Proteobacteria;c__Alphaproteobacteria;o__Rhizobiales;f__Xanthobacteraceae;g__Pseudolabrys;s__
d.bin.158	91.58	0.973	11400	4431333	d__Bacteria;p__Acidobacteriota;c__Acidobacteriae;o__Acidobacteriales;f__Koribacteraceae;g__;s__
d.bin.160	93.56	0.904	45965	5620649	d__Bacteria;p__Proteobacteria;c__Alphaproteobacteria;o__Sphingomonadales;f__Sphingomonadaceae;g__Rhizorhabdus;s__
d.bin.161	94.93	0.675	72655	1655289	d__Bacteria;p__Chlamydiota;c__Chlamydiia;o__Chlamydiales;f__Rhabdochlamydiaceae;g__JABDFI01;s__
d.bin.162	91.54	2.735	16022	3010695	d__Bacteria;p__Actinobacteriota;c__UBA4738;o__UBA4738;f__HRBIN12;g__;s__
d.bin.164	90.85	3.686	26506	2092797	d__Bacteria;p__Nitrospirota;c__Nitrospiria;o__Nitrospirales;f__Nitrospiraceae;g__2-02-FULL-62-14;s__
d.bin.167	91.31	1.893	29693	6147120	d__Bacteria;p__Planctomycetota;c__Phycisphaerae;o__UBA1161;f__UBA1161;g__;s__
d.bin.17	92.92	4.368	40022	5297196	d__Bacteria;p__Acidobacteriota;c__Blastocatellia;o__Pyrinomonadales;f__Pyrinomonadaceae;g__JACVRN01;s__
d.bin.170	90.18	0.442	16924	2411490	d__Bacteria;p__Proteobacteria;c__Alphaproteobacteria;o__Sphingomonadales;f__Sphingomonadaceae;g__Sphingomicrobium;s__
d.bin.174	97.8	1.098	30202	2537057	d__Bacteria;p__Eisenbacteria;c__RBG-16-71-46;o__SZUA-252;f__SZUA-252;g__WS-9;s__
d.bin.175	96.52	3.492	89742	4381594	d__Bacteria;p__Proteobacteria;c__Alphaproteobacteria;o__Micropepsales;f__Micropepsaceae;g__CAIYRG01;s__
d.bin.181	93.01	1.055	51262	3225510	d__Bacteria;p__Proteobacteria;c__Alphaproteobacteria;o__Caulobacterales;f__Hyphomonadaceae;g__Terricaulis;s__
d.bin.187	96.53	4.273	87877	7724233	d__Bacteria;p__Acidobacteriota;c__Blastocatellia;o__UBA7656;f__UBA7656;g__UBA7656;s__
d.bin.192	92	4.761	31991	3521763	d__Bacteria;p__Gemmatimonadota;c__Gemmatimonadetes;o__Gemmatimonadales;f__GWC2-71-9;g__;s__
d.bin.194	95.89	0	53329	2078304	d__Bacteria;p__Proteobacteria;c__Gammaproteobacteria;o__JABCZS01;f__JABCZS01;g__;s__
d.bin.198	98.77	1.698	256031	6227903	d__Bacteria;p__Proteobacteria;c__Gammaproteobacteria;o__Burkholderiales;f__SHXO01;g__;s__
d.bin.199	95.14	1.418	112332	3545045	d__Bacteria;p__Proteobacteria;c__Alphaproteobacteria;o__Micropepsales;f__Micropepsaceae;g__Rhizomicrobium;s__
d.bin.205	92.82	1.89	18070	3230910	d__Bacteria;p__Proteobacteria;c__Alphaproteobacteria;o__Rhizobiales;f__Aestuariivirgaceae;g__CABJBCQ01;s__
d.bin.206	98.31	1.709	229942	4913663	d__Bacteria;p__Acidobacteriota;c__Acidobacteriae;o__Acidobacteriales;f__Koribacteraceae;g__Sulfotelmatobacter;s__
d.bin.208	97.8	1.098	648288	4392013	d__Bacteria;p__Gemmatimonadota;c__Gemmatimonadetes;o__Gemmatimonadales;f__GWC2-71-9;g__;s__
d.bin.214	95.9	2.244	15390	2826696	d__Bacteria;p__Eremiobacterota;c__Eremiobacteria;o__Baltobacterales;f__Baltobacteraceae;g__Cybelea;s__
d.bin.217	96.77	4.462	65856	5698666	d__Bacteria;p__Planctomycetota;c__UBA1135;o__UBA1135;f__GCA-002686595;g__;s__
d.bin.226	94.5	1.098	10797	2491855	d__Bacteria;p__Eisenbacteria;c__RBG-16-71-46;o__SZUA-252;f__SZUA-252;g__WS-7;s__
d.bin.229	90.59	4.395	62549	3100548	d__Bacteria;p__Gemmatimonadota;c__Gemmatimonadetes;o__Gemmatimonadales;f__GWC2-71-9;g__AG25;s__
d.bin.23	91.3	0.869	66071	5018857	d__Bacteria;p__Acidobacteriota;c__Acidobacteriae;o__Bryobacterales;f__Bryobacteraceae;g__Palsa-187;s__
d.bin.231	93.82	2.564	19680	2551823	d__Bacteria;p__Actinobacteriota;c__UBA4738;o__UBA4738;f__;g__;s__
d.bin.233	92.87	1.364	48142	2571534	d__Bacteria;p__Actinobacteriota;c__Thermoleophilia;o__Solirubrobacterales;f__70-9;g__;s__
d.bin.234	91.64	1.818	33671	3259638	d__Bacteria;p__Nitrospirota;c__Nitrospiria;o__Nitrospirales;f__Nitrospiraceae;g__Palsa-1315;s__
d.bin.242	91.02	1.709	11988	3824039	d__Bacteria;p__Acidobacteriota;c__Thermoanaerobaculia;o__UBA5066;f__Gp7-AA6;g__;s__
d.bin.25	92.97	3.387	14073	8084917	d__Bacteria;p__Myxococcota;c__Polyangia;o__Haliangiales;f__Haliangiaceae;g__;s__
d.bin.250	100	0.492	485936	8596414	d__Bacteria;p__Bacteroidota;c__Bacteroidia;o__Chitinophagales;f__Chitinophagaceae;g__Chitinophaga;s__
d.bin.251	96.06	3.466	22605	3677842	d__Bacteria;p__Acidobacteriota;c__Mor1;o__Mor1;f__;g__;s__
d.bin.252	94.24	2.631	33430	10077906	d__Bacteria;p__Acidobacteriota;c__Acidobacteriae;o__Bryobacterales;f__Bryobacteraceae;g__Solibacter;s__
d.bin.255	90.22	1.075	37986	1983680	d__Bacteria;p__Omnitrophota;c__Omnitrophia;o__Omnitrophales;f__;g__;s__
d.bin.256	97.95	3.378	39845	6860809	d__Bacteria;p__Verrucomicrobiota;c__Verrucomicrobiae;o__Pedosphaerales;f__SIBH01;g__;s__
d.bin.258	92.54	4.741	21975	8542426	d__Bacteria;p__Myxococcota;c__Polyangia;o__Polyangiales;f__Polyangiaceae;g__;s__
d.bin.264	96.13	1.139	255863	6339107	d__Bacteria;p__Acidobacteriota;c__Acidobacteriae;o__Acidobacteriales;f__Gp1-AA117;g__Gp1-AA17;s__
d.bin.268	96.24	4.47	22321	4575668	d__Bacteria;p__Proteobacteria;c__Gammaproteobacteria;o__Burkholderiales;f__SG8-40;g__;s__
d.bin.27	93.64	4.054	13400	2938172	d__Bacteria;p__Verrucomicrobiota;c__Verrucomicrobiae;o__Chthoniobacterales;f__;g__;s__
d.bin.273	96.59	2.479	24311	5457961	d__Bacteria;p__Planctomycetota;c__UBA1135;o__UBA2386;f__UBA2386;g__;s__
d.bin.287	97.43	4.32	213959	5381605	d__Bacteria;p__Acidobacteriota;c__Blastocatellia;o__Pyrinomonadales;f__Pyrinomonadaceae;g__JACMLC01;s__
d.bin.288	97.97	0	148883	4856306	d__Bacteria;p__Verrucomicrobiota;c__Verrucomicrobiae;o__Pedosphaerales;f__SIBH01;g__;s__
d.bin.289	98.85	1.724	109586	6276871	d__Bacteria;p__Bacteroidota;c__Bacteroidia;o__Chitinophagales;f__Chitinophagaceae;g__Puia;s__
d.bin.295	100	0.617	250028	5345381	d__Bacteria;p__Proteobacteria;c__Gammaproteobacteria;o__Enterobacterales;f__DSM-103792;g__;s__
d.bin.299	91.39	3.942	34465	4934051	d__Bacteria;p__Planctomycetota;c__UBA1135;o__UBA1135;f__GCA-002686595;g__;s__
d.bin.302	99.02	1.098	159915	3137634	d__Bacteria;p__FCPU426;c__Palsa-1180;o__Palsa-1180;f__Palsa-1180;g__PALSA-1180;s__
d.bin.303	92.36	3.693	23954	3392470	d__Bacteria;p__Nitrospirota;c__Nitrospiria;o__Nitrospirales;f__Nitrospiraceae;g__Palsa-1315;s__
d.bin.318	90.69	3.418	70534	6599986	d__Bacteria;p__Acidobacteriota;c__Vicinamibacteria;o__Vicinamibacterales;f__UBA2999;g__Gp6-AA40;s__
d.bin.321	93.37	1.052	15527	3914416	d__Bacteria;p__Acidobacteriota;c__Holophagae;o__Holophagales;f__Holophagaceae;g__;s__
d.bin.322	99.32	3.378	243383	7832364	d__Bacteria;p__Verrucomicrobiota;c__Verrucomicrobiae;o__Chthoniobacterales;f__Chthoniobacteraceae;g__VFJQ01;s__
d.bin.327	91.48	3.773	13000	6381375	d__Bacteria;p__Proteobacteria;c__Alphaproteobacteria;o__Rhizobiales;f__Rhizobiaceae;g__Neorhizobium;s__
d.bin.331	91.57	4.326	10701	7061452	d__Bacteria;p__Acidobacteriota;c__Blastocatellia;o__Pyrinomonadales;f__Pyrinomonadaceae;g__PSRF01;s__
d.bin.332	96.03	1.724	70999	2565314	d__Bacteria;p__Actinobacteriota;c__Thermoleophilia;o__Solirubrobacterales;f__70-9;g__;s__
d.bin.333	97	0.434	112361	6788257	d__Bacteria;p__Acidobacteriota;c__Acidobacteriae;o__Bryobacterales;f__Bryobacteraceae;g__Palsa-187;s__
d.bin.34	96.55	0.766	24392	3927510	d__Bacteria;p__Bacteroidota;c__Bacteroidia;o__Chitinophagales;f__Chitinophagaceae;g__;s__
d.bin.340	96.24	2.136	25221	4561042	d__Bacteria;p__Acidobacteriota;c__Acidobacteriae;o__Acidobacteriales;f__Koribacteraceae;g__Gp1-AA145;s__
d.bin.346	97.8	1.163	26051	3367458	d__Bacteria;p__Gemmatimonadota;c__Gemmatimonadetes;o__Gemmatimonadales;f__GWC2-71-9;g__JABFSM01;s__
d.bin.347	95.72	0.854	24451	3047212	d__Bacteria;p__Actinobacteriota;c__UBA4738;o__UBA4738;f__UBA4738;g__AC-48;s__
d.bin.350	93.54	2.053	82002	3483579	d__Bacteria;p__Proteobacteria;c__Gammaproteobacteria;o__Steroidobacterales;f__Steroidobacteraceae;g__FEN-1191;s__
d.bin.354	93.9	3.661	13023	2801259	d__Bacteria;p__Actinobacteriota;c__Actinomycetia;o__Actinomycetales;f__Microbacteriaceae;g__Lysinimonas_A;s__
d.bin.355	95.5	1.123	339109	2496947	d__Bacteria;p__Elusimicrobiota;c__Elusimicrobia;o__2-01-FULL-59-12;f__;g__;s__
d.bin.356	98.52	0.164	243241	5422925	d__Bacteria;p__Bacteroidota;c__Bacteroidia;o__Chitinophagales;f__UBA10324;g__;s__
d.bin.357	91.8	3.197	15449	3672981	d__Bacteria;p__Proteobacteria;c__Gammaproteobacteria;o__Xanthomonadales;f__Rhodanobacteraceae;g__;s__
d.bin.36	90.1	3.846	27662	3261606	d__Bacteria;p__Gemmatimonadota;c__Gemmatimonadetes;o__Gemmatimonadales;f__GWC2-71-9;g__;s__
d.bin.363	95.66	1.934	28360	6724811	d__Bacteria;p__Bacteroidota;c__Bacteroidia;o__Cytophagales;f__Cyclobacteriaceae;g__Chryseolinea_A;s__
d.bin.365	92.09	3.472	16758	4722123	d__Bacteria;p__Acidobacteriota;c__Thermoanaerobaculia;o__UBA5066;f__Gp7-AA6;g__;s__
d.bin.367	96.57	3.845	21962	9213810	d__Bacteria;p__Bacteroidota;c__Bacteroidia;o__Chitinophagales;f__Chitinophagaceae;g__Paraflavitalea;s__
d.bin.375	92.66	1.648	100294	3443665	d__Bacteria;p__Gemmatimonadota;c__Gemmatimonadetes;o__Gemmatimonadales;f__GWC2-71-9;g__20CM-2-65-7;s__
d.bin.383	90.8	4.838	25336	3376367	d__Bacteria;p__Proteobacteria;c__Gammaproteobacteria;o__Burkholderiales;f__SG8-39;g__;s__
d.bin.387	90.78	1.709	251891	5159804	d__Bacteria;p__Acidobacteriota;c__Acidobacteriae;o__UBA7541;f__UBA7541;g__UBA7541;s__
d.bin.389	99.14	0.854	64718	5666974	d__Bacteria;p__Actinobacteriota;c__UBA4738;o__;f__;g__;s__
d.bin.393	94.71	3.418	95933	8048602	d__Bacteria;p__Acidobacteriota;c__Blastocatellia;o__Pyrinomonadales;f__Pyrinomonadaceae;g__;s__
d.bin.395	94.14	2.463	36755	7544148	d__Bacteria;p__Acidobacteriota;c__Acidobacteriae;o__Bryobacterales;f__Bryobacteraceae;g__Palsa-187;s__
d.bin.396	94.95	1.149	22964	4651838	d__Bacteria;p__Bacteroidota;c__Bacteroidia;o__Chitinophagales;f__Chitinophagaceae;g__UTBCD1;s__
d.bin.397	98.97	2.631	98357	6072901	d__Bacteria;p__Acidobacteriota;c__Acidobacteriae;o__Bryobacterales;f__Bryobacteraceae;g__QHXW01;s__
d.bin.4	93.94	2.84	46132	2659362	d__Bacteria;p__Proteobacteria;c__Alphaproteobacteria;o__Caulobacterales;f__Caulobacteraceae;g__NCED01;s__
d.bin.41	98.09	0.181	631051	5401601	d__Bacteria;p__Chloroflexota;c__Anaerolineae;o__Anaerolineales;f__EnvOPS12;g__OLB14;s__
d.bin.47	98.9	3.396	53370	5818617	d__Bacteria;p__Gemmatimonadota;c__Gemmatimonadetes;o__Gemmatimonadales;f__Gemmatimonadaceae;g__AG2;s__
d.bin.50	95.11	4.573	12487	4501216	d__Bacteria;p__Bacteroidota;c__Bacteroidia;o__Chitinophagales;f__Chitinophagaceae;g__UTBCD1;s__
d.bin.51	97.76	1.537	32429	4544601	d__Bacteria;p__Bacteroidota;c__Bacteroidia;o__Cytophagales;f__Cyclobacteriaceae;g__ELB16-189;s__
d.bin.55	95.72	0.854	207405	3950800	d__Bacteria;p__Acidobacteriota;c__Acidobacteriae;o__UBA7541;f__UBA7541;g__;s__
d.bin.67	91.62	4.704	35310	6019696	d__Bacteria;p__Proteobacteria;c__Gammaproteobacteria;o__Burkholderiales;f__Burkholderiaceae;g__Rhodoferax;s__
d.bin.68	96.36	0.938	39042	3674411	d__Bacteria;p__Proteobacteria;c__Gammaproteobacteria;o__Burkholderiales;f__SG8-39;g__;s__
d.bin.69	95.03	1.395	22512	3801423	d__Bacteria;p__Proteobacteria;c__Gammaproteobacteria;o__Burkholderiales;f__Burkholderiaceae;g__Ramlibacter;s__
d.bin.70	93.48	2.354	15967	8474136	d__Bacteria;p__Actinobacteriota;c__Actinomycetia;o__Streptomycetales;f__Streptomycetaceae;g__Streptacidiphilus;s__Streptacidiphilus jeojiense
d.bin.72	94.87	1.709	235556	4840937	d__Bacteria;p__Acidobacteriota;c__Acidobacteriae;o__UBA7541;f__UBA7541;g__UBA7541;s__
d.bin.8	96.33	0.362	130357	2394532	d__Bacteria;p__Proteobacteria;c__Gammaproteobacteria;o__Steroidobacterales;f__Steroidobacteraceae;g__FEN-1191;s__
d.bin.80	95.2	2.054	85095	4161317	d__Bacteria;p__Verrucomicrobiota;c__Verrucomicrobiae;o__Opitutales;f__Opitutaceae;g__CAIYFD01;s__
d.bin.86	92.73	1.265	21563	4506303	d__Bacteria;p__Proteobacteria;c__Alphaproteobacteria;o__Rhizobiales;f__Xanthobacteraceae;g__Pseudolabrys;s__
d.bin.87	94.77	2.068	19466	4814291	d__Bacteria;p__Bacteroidota;c__Bacteroidia;o__Chitinophagales;f__Chitinophagaceae;g__Puia;s__
d.bin.89	99.4	0.297	216992	4457748	d__Bacteria;p__Bacteroidota;c__Bacteroidia;o__Cytophagales;f__Cyclobacteriaceae;g__ELB16-189;s__
d.bin.1	72.15	1.282	5675	4153347	d__Bacteria;p__Actinobacteriota;c__Thermoleophilia;o__Solirubrobacterales;f__Solirubrobacteraceae;g__CADCVQ01;s__
d.bin.100	70.32	3.448	9422	3276572	d__Bacteria;p__Proteobacteria;c__Gammaproteobacteria;o__Burkholderiales;f__SG8-39;g__SCGC-AG-212-J23;s__
d.bin.102	72.29	3.975	5629	2064561	d__Bacteria;p__Chloroflexota;c__Ellin6529;o__QHBO01;f__QHBO01;g__;s__
d.bin.103	78.6	4.516	16918	6603802	d__Bacteria;p__Myxococcota;c__Polyangia;o__Polyangiales;f__;g__;s__
d.bin.106	87.05	4.193	11605	6254727	d__Bacteria;p__Myxococcota;c__XYA12-FULL-58-9;o__XYA12-FULL-58-9;f__XYA12-FULL-58-9;g__;s__
d.bin.108	73.48	1.851	7413	2066879	d__Bacteria;p__Chloroflexota;c__Ellin6529;o__CSP1-4;f__CSP1-4;g__;s__
d.bin.11	86.18	2.281	9496	6266562	d__Bacteria;p__Bacteroidota;c__Bacteroidia;o__Cytophagales;f__Cyclobacteriaceae;g__Chryseolinea_A;s__
d.bin.111	71.37	2.197	5645	2306004	d__Bacteria;p__Gemmatimonadota;c__Gemmatimonadetes;o__Gemmatimonadales;f__Gemmatimonadaceae;g__UBA4720;s__
d.bin.113	78.37	0.537	5878	806942	d__Bacteria;p__Proteobacteria;c__Alphaproteobacteria;o__WRAU01;f__;g__;s__
d.bin.115	70.63	4.545	5628	3111093	d__Bacteria;p__Planctomycetota;c__Phycisphaerae;o__Phycisphaerales;f__SM1A02;g__;s__
d.bin.116	87.81	1.15	27909	2452493	d__Bacteria;p__Proteobacteria;c__Gammaproteobacteria;o__Xanthomonadales;f__Rhodanobacteraceae;g__66-474;s__
d.bin.117	77.54	2.564	14930	3994920	d__Bacteria;p__Acidobacteriota;c__Blastocatellia;o__Pyrinomonadales;f__Pyrinomonadaceae;g__UBA11740;s__
d.bin.121	80.18	2.564	9755	2915076	d__Bacteria;p__Actinobacteriota;c__UBA4738;o__UBA4738;f__HRBIN12;g__;s__
d.bin.126	74.54	3.133	8897	3770967	d__Bacteria;p__Desulfobacterota_B;c__Binatia;o__UBA9968;f__UBA9968;g__DP-20;s__
d.bin.129	79.36	2.332	9618	4059446	d__Bacteria;p__Acidobacteriota;c__Vicinamibacteria;o__Vicinamibacterales;f__SCN-69-37;g__;s__
d.bin.13	80.64	3.44	14655	6080362	d__Bacteria;p__Desulfobacterota_B;c__Binatia;o__UTPRO1;f__UTPRO1;g__UTPRO1;s__
d.bin.130	86.94	1.308	11319	2638846	d__Bacteria;p__Proteobacteria;c__Gammaproteobacteria;o__DSM-16500;f__DSM-16500;g__;s__
d.bin.131	74.75	0.888	8625	3739982	d__Bacteria;p__Planctomycetota;c__Phycisphaerae;o__UBA1845;f__UTPLA1;g__PLA3;s__
d.bin.132	82.02	1.123	19643	983058	d__Bacteria;p__Dependentiae;c__Babeliae;o__Babeliales;f__;g__;s__
d.bin.135	88.06	3.759	12711	2794668	d__Bacteria;p__Proteobacteria;c__Alphaproteobacteria;o__Sphingomonadales;f__Sphingomonadaceae;g__;s__
d.bin.136	78.39	4.753	8653	2755291	d__Bacteria;p__Acidobacteriota;c__Blastocatellia;o__Pyrinomonadales;f__Pyrinomonadaceae;g__OLB17;s__
d.bin.139	81.1	2.568	8097	2683797	d__Bacteria;p__Bacteroidota;c__Kapabacteria;o__;f__;g__;s__
d.bin.141	82.05	4.74	6386	4185284	d__Bacteria;p__Proteobacteria;c__Gammaproteobacteria;o__Xanthomonadales;f__Rhodanobacteraceae;g__Dokdonella_A;s__
d.bin.142	79.67	4.395	11609	3415692	d__Bacteria;p__Gemmatimonadota;c__Gemmatimonadetes;o__Gemmatimonadales;f__GWC2-71-9;g__;s__
d.bin.146	84.88	2.673	10904	4081751	d__Bacteria;p__Proteobacteria;c__Alphaproteobacteria;o__Caulobacterales;f__Hyphomonadaceae;g__UBA7672;s__
d.bin.147	73.65	4.579	8196	3421865	d__Bacteria;p__Proteobacteria;c__Alphaproteobacteria;o__Micropepsales;f__Micropepsaceae;g__Rhizomicrobium;s__
d.bin.15	85.58	1.709	12528	7244334	d__Bacteria;p__Acidobacteriota;c__Vicinamibacteria;o__Vicinamibacterales;f__UBA2999;g__Gp6-AA40;s__
d.bin.152	82.98	4.557	8408	2971784	d__Bacteria;p__Proteobacteria;c__Gammaproteobacteria;o__Burkholderiales;f__SG8-40;g__;s__
d.bin.153	83.98	3.111	22851	4484717	d__Bacteria;p__Proteobacteria;c__Alphaproteobacteria;o__Rhizobiales;f__Xanthobacteraceae;g__VAZQ01;s__
d.bin.155	79.98	1.762	6796	4026779	d__Bacteria;p__Acidobacteriota;c__Thermoanaerobaculia;o__Gp7-AA8;f__Gp7-AA8;g__Gp7-AA10;s__
d.bin.156	81.94	2.747	9722	2772002	d__Bacteria;p__Gemmatimonadota;c__Gemmatimonadetes;o__Gemmatimonadales;f__Gemmatimonadaceae;g__UBA4720;s__
d.bin.159	73.04	0	13157	2724890	d__Bacteria;p__Gemmatimonadota;c__Gemmatimonadetes;o__Gemmatimonadales;f__GWC2-71-9;g__;s__
d.bin.16	71.72	1.709	11509	4341392	d__Bacteria;p__Acidobacteriota;c__Blastocatellia;o__Pyrinomonadales;f__Pyrinomonadaceae;g__UBA11741;s__
d.bin.163	72.57	0	5831	1893084	d__Bacteria;p__Proteobacteria;c__Gammaproteobacteria;o__Xanthomonadales;f__Xanthomonadaceae;g__Lysobacter_C;s__
d.bin.165	88.16	2.504	9711	3661719	d__Bacteria;p__Proteobacteria;c__Gammaproteobacteria;o__Pseudomonadales;f__;g__;s__
d.bin.168	74.62	3.296	5548	1809547	d__Bacteria;p__Zixibacteria;c__MSB-5A5;o__DSPP01;f__DSPP01;g__DSPP01;s__
d.bin.171	71.98	2.807	4796	3936070	d__Bacteria;p__Proteobacteria;c__Gammaproteobacteria;o__Steroidobacterales;f__Steroidobacteraceae;g__Steroidobacter_A;s__
d.bin.172	78.72	1.996	5543	2376399	d__Bacteria;p__Proteobacteria;c__Gammaproteobacteria;o__Steroidobacterales;f__Steroidobacteraceae;g__CAILZL01;s__
d.bin.176	81.65	2.67	13705	5889930	d__Bacteria;p__Methylomirabilota;c__Methylomirabilia;o__Rokubacteriales;f__;g__;s__
d.bin.178	85.01	3.719	20623	2693335	d__Bacteria;p__Proteobacteria;c__Gammaproteobacteria;o__Nevskiales;f__Nevskiaceae;g__;s__
d.bin.18	71.03	0.263	20239	2803278	d__Bacteria;p__Proteobacteria;c__Alphaproteobacteria;o__Rhizobiales;f__Xanthobacteraceae;g__;s__
d.bin.180	85.01	1.872	11347	3014103	d__Bacteria;p__Elusimicrobiota;c__Elusimicrobia;o__UBA1565;f__UBA9628;g__PALSA-1176;s__
d.bin.182	83.32	3.234	11670	4238008	d__Bacteria;p__Bacteroidota;c__Bacteroidia;o__Chitinophagales;f__Saprospiraceae;g__;s__
d.bin.184	71.32	2.248	13625	4946310	d__Bacteria;p__Planctomycetota;c__UBA1135;o__UBA1135;f__GCA-002686595;g__;s__
d.bin.185	76.32	2.758	8228	3137159	d__Bacteria;p__Proteobacteria;c__Alphaproteobacteria;o__Sphingomonadales;f__Sphingomonadaceae;g__Novosphingobium;s__
d.bin.190	85.82	2.938	13548	7052125	d__Bacteria;p__Proteobacteria;c__Gammaproteobacteria;o__Burkholderiales;f__Burkholderiaceae;g__Paraburkholderia;s__
d.bin.193	82.03	1.709	8022	4263952	d__Bacteria;p__Acidobacteriota;c__Acidobacteriae;o__Acidobacteriales;f__Koribacteraceae;g__;s__
d.bin.196	88.46	2.197	11619	2951424	d__Bacteria;p__Gemmatimonadota;c__Gemmatimonadetes;o__Gemmatimonadales;f__GWC2-71-9;g__;s__
d.bin.197	71.72	1.724	11955	4984549	d__Bacteria;p__Acidobacteriota;c__Acidobacteriae;o__UBA7541;f__UBA7541;g__UBA7541;s__
d.bin.2	75.63	2.747	5932	1998113	d__Bacteria;p__Gemmatimonadota;c__Gemmatimonadetes;o__Gemmatimonadales;f__GWC2-71-9;g__;s__
d.bin.200	76.28	3.378	7715	4580798	d__Bacteria;p__Verrucomicrobiota;c__Verrucomicrobiae;o__Pedosphaerales;f__UBA3939;g__;s__
d.bin.202	71.85	2.687	6050	1846540	d__Bacteria;p__Elusimicrobiota;c__Elusimicrobia;o__02-12-FULL-59-9;f__;g__;s__
d.bin.203	79.58	0.164	7702	4544127	d__Bacteria;p__Bacteroidota;c__Bacteroidia;o__Chitinophagales;f__Chitinophagaceae;g__Ferruginibacter;s__
d.bin.204	78.99	0.229	7668	3457920	d__Bacteria;p__Gemmatimonadota;c__Gemmatimonadetes;o__Gemmatimonadales;f__Gemmatimonadaceae;g__;s__
d.bin.210	86.64	2.066	11431	1545253	d__Bacteria;p__Chlamydiota;c__Chlamydiia;o__Chlamydiales;f__Rhabdochlamydiaceae;g__CAIJXB01;s__
d.bin.211	78.07	2.597	12065	2842613	d__Bacteria;p__Proteobacteria;c__Alphaproteobacteria;o__Caulobacterales;f__Hyphomonadaceae;g__;s__
d.bin.212	82.86	1.929	8619	4485332	d__Bacteria;p__Bacteroidota;c__Bacteroidia;o__Chitinophagales;f__UBA10324;g__;s__
d.bin.216	70.57	1.38	5653	1238237	d__Bacteria;p__Chlamydiota;c__Chlamydiia;o__Chlamydiales;f__SM23-39;g__2-02-FULL-45-22_A;s__
d.bin.222	85.2	2.693	11907	5203521	d__Bacteria;p__Proteobacteria;c__Alphaproteobacteria;o__Rhizobiales;f__Rhizobiaceae;g__Rhizobium;s__Rhizobium lusitanum
d.bin.224	87.65	1.647	17540	3120443	d__Bacteria;p__Proteobacteria;c__Gammaproteobacteria;o__Burkholderiales;f__SG8-39;g__SCGC-AG-212-J23;s__
d.bin.225	86.97	0.833	15217	2428356	d__Bacteria;p__Proteobacteria;c__Alphaproteobacteria;o__Sphingomonadales;f__Sphingomonadaceae;g__Allosphingosinicella;s__
d.bin.230	85.2	3.242	14101	2651228	d__Archaea;p__Thermoplasmatota;c__Thermoplasmata;o__DTKX01;f__;g__;s__
d.bin.236	85.93	1.006	37618	3618609	d__Bacteria;p__Proteobacteria;c__Alphaproteobacteria;o__Rhizobiales;f__Xanthobacteraceae;g__Pseudolabrys;s__
d.bin.237	71.81	0.47	14898	5789695	d__Bacteria;p__Proteobacteria;c__Gammaproteobacteria;o__Burkholderiales;f__Burkholderiaceae;g__Rhizobacter;s__
d.bin.24	71.78	0	25103	2590211	d__Bacteria;p__Gemmatimonadota;c__Gemmatimonadetes;o__Gemmatimonadales;f__GWC2-71-9;g__20CM-2-65-7;s__
d.bin.240	88.68	3.26	66111	3945750	d__Bacteria;p__Proteobacteria;c__Gammaproteobacteria;o__Steroidobacterales;f__Steroidobacteraceae;g__;s__
d.bin.241	80.95	3.472	11861	3179150	d__Bacteria;p__Acidobacteriota;c__Blastocatellia;o__Pyrinomonadales;f__Pyrinomonadaceae;g__OLB17;s__
d.bin.243	77.66	4.32	15842	5281146	d__Bacteria;p__Acidobacteriota;c__Blastocatellia;o__Pyrinomonadales;f__Pyrinomonadaceae;g__UBA11740;s__
d.bin.245	70.03	3.703	4750	1797426	d__Bacteria;p__Armatimonadota;c__Fimbriimonadia;o__Fimbriimonadales;f__Fimbriimonadaceae;g__UphvI-Ar2;s__
d.bin.247	75.14	2.617	7391	3942568	d__Bacteria;p__Acidobacteriota;c__Acidobacteriae;o__UBA7541;f__UBA7541;g__Palsa-147;s__
d.bin.248	85.69	2.197	10334	3229504	d__Bacteria;p__Gemmatimonadota;c__Gemmatimonadetes;o__Gemmatimonadales;f__GWC2-71-9;g__Palsa-1233;s__
d.bin.249	87.48	4.466	11453	3836310	d__Bacteria;p__Proteobacteria;c__Gammaproteobacteria;o__Xanthomonadales;f__Rhodanobacteraceae;g__;s__
d.bin.253	79.18	1.455	9533	4771128	d__Bacteria;p__Proteobacteria;c__Alphaproteobacteria;o__Dongiales;f__Dongiaceae;g__Hypericibacter;s__Hypericibacter terrae
d.bin.257	74.7	1.231	6791	5955258	d__Bacteria;p__Bacteroidota;c__Bacteroidia;o__Chitinophagales;f__Chitinophagaceae;g__Puia;s__
d.bin.26	84.34	1.6	7428	2762054	d__Bacteria;p__Proteobacteria;c__Gammaproteobacteria;o__Steroidobacterales;f__Steroidobacteraceae;g__FEN-1191;s__
d.bin.261	80.07	1.612	8749	5960693	d__Bacteria;p__Myxococcota;c__Polyangia;o__Polyangiales;f__;g__;s__
d.bin.265	79.64	0.923	10391	9187368	d__Bacteria;p__Acidobacteriota;c__Acidobacteriae;o__Bryobacterales;f__Bryobacteraceae;g__;s__
d.bin.266	72.66	4.431	7365	2640712	d__Bacteria;p__Proteobacteria;c__Alphaproteobacteria;o__Caulobacterales;f__Caulobacteraceae;g__;s__
d.bin.267	81.94	2.491	5720	1853831	d__Bacteria;p__Chlamydiota;c__Chlamydiia;o__Chlamydiales;f__FEN-1388;g__;s__
d.bin.269	84.05	2.155	6819	2076188	d__Bacteria;p__Actinobacteriota;c__Thermoleophilia;o__Gaiellales;f__Gaiellaceae;g__AC-32;s__
d.bin.270	80.03	3.211	4537	5165437	d__Bacteria;p__Bacteroidota;c__Bacteroidia;o__Cytophagales;f__Cyclobacteriaceae;g__Chryseolinea_A;s__
d.bin.271	81.68	3.504	9234	5063792	d__Bacteria;p__Proteobacteria;c__Gammaproteobacteria;o__Burkholderiales;f__Burkholderiaceae;g__Rhodoferax;s__
d.bin.274	75.34	1.724	18369	5160573	d__Bacteria;p__Acidobacteriota;c__Acidobacteriae;o__Acidobacteriales;f__Koribacteraceae;g__;s__
d.bin.276	80.45	4.468	7622	4073820	d__Bacteria;p__Proteobacteria;c__Gammaproteobacteria;o__Steroidobacterales;f__Steroidobacteraceae;g__CAILZL01;s__
d.bin.277	75.43	0.917	5793	1979999	d__Bacteria;p__Chloroflexota;c__Ellin6529;o__QHBO01;f__QHBO01;g__;s__
d.bin.279	87.42	4.131	14493	4643881	d__Bacteria;p__Acidobacteriota;c__Acidobacteriae;o__Acidobacteriales;f__Gp1-AA117;g__Gp1-AA17;s__
d.bin.28	86.35	1.842	9633	7018697	d__Bacteria;p__Actinobacteriota;c__Actinomycetia;o__Mycobacteriales;f__Micromonosporaceae;g__Actinoplanes;s__
d.bin.280	87.72	4.495	12618	3566395	d__Bacteria;p__Gemmatimonadota;c__Gemmatimonadetes;o__Gemmatimonadales;f__Gemmatimonadaceae;g__Fen-1231;s__
d.bin.281	75.99	0.862	5044	2301048	d__Bacteria;p__Actinobacteriota;c__Thermoleophilia;o__Gaiellales;f__Gaiellaceae;g__Gaiella;s__
d.bin.282	81.74	2.849	7104	4692182	d__Bacteria;p__Acidobacteriota;c__Acidobacteriae;o__Acidobacteriales;f__Gp1-AA117;g__Gp1-AA17;s__
d.bin.283	80.12	2.564	5917	3430075	d__Bacteria;p__Actinobacteriota;c__Acidimicrobiia;o__Acidimicrobiales;f__Ilumatobacteraceae;g__;s__
d.bin.286	72.36	0.642	10938	5882546	d__Bacteria;p__Planctomycetota;c__Planctomycetes;o__Planctomycetales;f__UBA10511;g__SIAF01;s__
d.bin.29	75.76	2.93	7812	6949504	d__Bacteria;p__Gemmatimonadota;c__Gemmatimonadetes;o__Gemmatimonadales;f__Gemmatimonadaceae;g__AG2;s__
d.bin.290	89.5	3.893	18576	4764917	d__Bacteria;p__Acidobacteriota;c__Acidobacteriae;o__UBA7541;f__UBA7541;g__UBA7541;s__
d.bin.292	77.82	4.112	7790	2294168	d__Bacteria;p__Actinobacteriota;c__UBA4738;o__UBA4738;f__HRBIN12;g__;s__
d.bin.294	83.85	3.732	9744	5136057	d__Bacteria;p__Bacteroidota;c__Bacteroidia;o__Cytophagales;f__Cyclobacteriaceae;g__ELB16-189;s__
d.bin.298	84.47	2.227	7327	3323816	d__Bacteria;p__FCPU426;c__JAAXVQ01;o__;f__;g__;s__
d.bin.3	89.24	4.093	14910	3960284	d__Bacteria;p__Verrucomicrobiota;c__Verrucomicrobiae;o__Chthoniobacterales;f__UBA10450;g__AV80;s__
d.bin.300	81.5	2.333	6635	3476647	d__Bacteria;p__Proteobacteria;c__Alphaproteobacteria;o__ATCC43930;f__Stellaceae;g__AP-15;s__
d.bin.301	79.65	3.448	29369	2922422	d__Bacteria;p__Proteobacteria;c__Gammaproteobacteria;o__Burkholderiales;f__Rhodocyclaceae;g__Ga0074130;s__
d.bin.310	72.98	4.202	12416	2350058	d__Bacteria;p__Proteobacteria;c__Alphaproteobacteria;o__Sphingomonadales;f__Sphingomonadaceae;g__Allosphingosinicella;s__
d.bin.311	71.35	3.883	15528	648985	d__Archaea;p__Thermoproteota;c__Nitrososphaeria;o__Nitrososphaerales;f__Nitrosopumilaceae;g__TA-20;s__
d.bin.312	87.65	1.927	25624	3574228	d__Bacteria;p__Proteobacteria;c__Alphaproteobacteria;o__Rhizobiales;f__Xanthobacteraceae;g__Pseudolabrys;s__
d.bin.313	88.4	3.466	7431	3050306	d__Bacteria;p__Acidobacteriota;c__Thermoanaerobaculia;o__UBA5704;f__UBA5704;g__;s__
d.bin.314	76.33	1.715	5014	2740015	d__Bacteria;p__Actinobacteriota;c__Actinomycetia;o__Actinomycetales;f__Microbacteriaceae;g__Rhodoglobus;s__
d.bin.315	85.56	4.008	15617	3674958	d__Bacteria;p__Proteobacteria;c__Gammaproteobacteria;o__Steroidobacterales;f__Steroidobacteraceae;g__;s__
d.bin.316	79.66	4.128	11662	3255060	d__Bacteria;p__Chloroflexota;c__Ellin6529;o__CSP1-4;f__CSP1-4;g__C-114;s__
d.bin.317	76.99	2.702	6791	3060407	d__Bacteria;p__Verrucomicrobiota;c__Verrucomicrobiae;o__Chthoniobacterales;f__UBA10450;g__;s__
d.bin.32	72.74	3.535	4984	4156583	d__Bacteria;p__Proteobacteria;c__Gammaproteobacteria;o__Burkholderiales;f__Burkholderiaceae;g__Rhodoferax_B;s__
d.bin.320	78.06	3.064	10931	5661384	d__Bacteria;p__Myxococcota;c__Polyangia;o__Polyangiales;f__Polyangiaceae;g__;s__
d.bin.323	72.85	3.296	12799	2150778	d__Bacteria;p__Gemmatimonadota;c__Gemmatimonadetes;o__Gemmatimonadales;f__GWC2-71-9;g__;s__
d.bin.324	72.03	2.279	4989	3432037	d__Bacteria;p__Actinobacteriota;c__Thermoleophilia;o__Solirubrobacterales;f__Solirubrobacteraceae;g__;s__
d.bin.325	71.38	2.635	4554	4308230	d__Bacteria;p__Acidobacteriota;c__Thermoanaerobaculia;o__UBA5704;f__UBA5704;g__;s__
d.bin.326	81.99	4.408	11082	9622502	d__Bacteria;p__Myxococcota;c__Polyangia;o__Palsa-1104;f__Palsa-1104;g__;s__
d.bin.328	80.46	2.037	6540	6827528	d__Bacteria;p__Armatimonadota;c__SYMT01;o__SYMT01;f__SYMT01;g__;s__
d.bin.329	87.53	3.881	18245	4923670	d__Bacteria;p__Proteobacteria;c__Alphaproteobacteria;o__Rhizobiales;f__Rhizobiaceae;g__Rhizobium;s__
d.bin.33	75.58	0	26485	744620	d__Bacteria;p__Patescibacteria;c__Paceibacteria;o__UBA6257;f__2-01-FULL-56-20;g__MHLB01;s__
d.bin.330	75.43	4.954	8464	3628761	d__Bacteria;p__Verrucomicrobiota;c__Kiritimatiellae;o__LD1-PB3;f__CAIVKH01;g__CAIVKH01;s__
d.bin.334	86.12	2.564	13093	3277297	d__Bacteria;p__Acidobacteriota;c__Blastocatellia;o__Pyrinomonadales;f__Pyrinomonadaceae;g__OLB17;s__
d.bin.336	87.31	3.633	8492	2602102	d__Bacteria;p__Proteobacteria;c__Gammaproteobacteria;o__DSM-16500;f__DSM-16500;g__;s__
d.bin.337	70.19	2.97	7947	2129169	d__Bacteria;p__Chloroflexota;c__Ellin6529;o__P2-11E;f__P2-11E;g__UBA4735;s__
d.bin.339	73.43	1.724	34186	10892959	d__Bacteria;p__Proteobacteria;c__Gammaproteobacteria;o__Steroidobacterales;f__Steroidobacteraceae;g__;s__
d.bin.341	74.93	2.219	14276	5442807	d__Bacteria;p__Proteobacteria;c__Gammaproteobacteria;o__Burkholderiales;f__Burkholderiaceae;g__CAIMXF01;s__
d.bin.344	79.62	1.724	8753	3126096	d__Bacteria;p__Gemmatimonadota;c__Gemmatimonadetes;o__Gemmatimonadales;f__GWC2-71-9;g__;s__
d.bin.348	83.01	3.94	7788	3832235	d__Bacteria;p__Bacteroidota;c__Bacteroidia;o__Chitinophagales;f__Chitinophagaceae;g__VBAT01;s__
d.bin.349	83.04	1.856	7127	4937752	d__Bacteria;p__Bacteroidota;c__Bacteroidia;o__Chitinophagales;f__Chitinophagaceae;g__;s__
d.bin.359	84.67	0	5982	4694340	d__Bacteria;p__Spirochaetota;c__Leptospirae;o__Leptospirales;f__Leptospiraceae;g__UBA2033;s__
d.bin.360	79.89	1.098	6484	3817580	d__Bacteria;p__Gemmatimonadota;c__Gemmatimonadetes;o__Gemmatimonadales;f__GWC2-71-9;g__;s__
d.bin.361	75.6	1.463	13644	2293239	d__Bacteria;p__Proteobacteria;c__Alphaproteobacteria;o__Sphingomonadales;f__Sphingomonadaceae;g__Allosphingosinicella;s__
d.bin.368	74.65	2.621	6759	2834772	d__Bacteria;p__Elusimicrobiota;c__Elusimicrobia;o__UBA1565;f__UBA9628;g__PALSA-1176;s__
d.bin.369	86.81	0.341	62283	2479558	d__Bacteria;p__Proteobacteria;c__Alphaproteobacteria;o__Sphingomonadales;f__Sphingomonadaceae;g__Sphingobium;s__
d.bin.37	81.99	2.272	6045	2949041	d__Bacteria;p__Planctomycetota;c__UBA1135;o__PLA2;f__;g__;s__
d.bin.370	75.25	1.435	10050	4681456	d__Bacteria;p__Proteobacteria;c__Alphaproteobacteria;o__Rhizobiales;f__Xanthobacteraceae;g__Bradyrhizobium;s__
d.bin.373	70.54	3.926	4850	3668360	d__Bacteria;p__Proteobacteria;c__Alphaproteobacteria;o__Dongiales;f__Dongiaceae;g__;s__
d.bin.376	74.29	4.31	37589	6995361	d__Bacteria;p__Acidobacteriota;c__Vicinamibacteria;o__Vicinamibacterales;f__2-12-FULL-66-21;g__;s__
d.bin.378	78.05	1.244	5334	2506131	d__Bacteria;p__Proteobacteria;c__Alphaproteobacteria;o__Caulobacterales;f__Hyphomonadaceae;g__VFBF01;s__
d.bin.38	78.52	2.541	12658	4908789	d__Bacteria;p__Planctomycetota;c__Planctomycetes;o__Pirellulales;f__Pirellulaceae;g__SXOA01;s__
d.bin.388	78.05	0.187	5308	1865091	d__Bacteria;p__Elusimicrobiota;c__Elusimicrobia;o__F11;f__FEN-1173;g__;s__
d.bin.39	72.68	2.197	14956	3384365	d__Bacteria;p__Gemmatimonadota;c__Gemmatimonadetes;o__Gemmatimonadales;f__GWC2-71-9;g__20CM-2-65-7;s__
d.bin.391	76.22	1.098	13407	3216543	d__Bacteria;p__Gemmatimonadota;c__Gemmatimonadetes;o__Gemmatimonadales;f__GWC2-71-9;g__JACDDX01;s__
d.bin.392	78.25	4.326	7159	4836124	d__Bacteria;p__Acidobacteriota;c__Blastocatellia;o__UBA7656;f__UBA7656;g__;s__
d.bin.394	75.61	4.545	6024	4156482	d__Bacteria;p__Gemmatimonadota;c__Gemmatimonadetes;o__Gemmatimonadales;f__GWC2-71-9;g__JACDDX01;s__
d.bin.40	86.88	2.339	11154	4532371	d__Bacteria;p__Planctomycetota;c__Phycisphaerae;o__Phycisphaerales;f__SM1A02;g__F1-120-MAGs238;s__
d.bin.400	79.59	3.506	12739	3417754	d__Bacteria;p__Proteobacteria;c__Gammaproteobacteria;o__Steroidobacterales;f__Steroidobacteraceae;g__13-2-20CM-66-19;s__
d.bin.401	83.33	4.7	9054	6505356	d__Bacteria;p__Acidobacteriota;c__Blastocatellia;o__UBA7656;f__UBA7656;g__;s__
d.bin.402	78.12	2.404	7308	2882475	d__Bacteria;p__Bacteroidota;c__Ignavibacteria;o__SJA-28;f__OLB5;g__;s__
d.bin.42	73.27	3.275	16788	6756035	d__Bacteria;p__Gemmatimonadota;c__Gemmatimonadetes;o__Gemmatimonadales;f__Gemmatimonadaceae;g__AG2;s__
d.bin.43	73.98	2.475	6449	4630641	d__Bacteria;p__Chloroflexota;c__Ktedonobacteria;o__Ktedonobacterales;f__;g__;s__
d.bin.46	73.92	0	13940	2458169	d__Bacteria;p__Chloroflexota;c__Ellin6529;o__P2-11E;f__P2-11E;g__3-1-20CM-2-70-9;s__
d.bin.48	77.16	0.133	5531	4631809	d__Bacteria;p__Planctomycetota;c__Phycisphaerae;o__UBA1845;f__Fen-1342;g__;s__
d.bin.49	86.48	2.832	6538	3698383	d__Bacteria;p__Bacteroidota;c__Bacteroidia;o__Chitinophagales;f__Chitinophagaceae;g__Flavisolibacter;s__
d.bin.5	88.99	0.81	10959	2427415	d__Bacteria;p__Verrucomicrobiota;c__Verrucomicrobiae;o__Chthoniobacterales;f__UBA10450;g__Palsa-1382;s__
d.bin.53	83.99	2.967	6294	3168967	d__Bacteria;p__Proteobacteria;c__Gammaproteobacteria;o__Burkholderiales;f__SG8-39;g__SCGC-AG-212-J23;s__
d.bin.54	79.72	1.756	6753	3364645	d__Bacteria;p__Acidobacteriota;c__UBA4820;o__;f__;g__;s__
d.bin.58	88.41	1.233	17815	3483509	d__Bacteria;p__Proteobacteria;c__Gammaproteobacteria;o__Pseudomonadales;f__Cellvibrionaceae;g__Cellvibrio;s__
d.bin.59	70.47	2.925	5239	2798788	d__Bacteria;p__Proteobacteria;c__Alphaproteobacteria;o__Sphingomonadales;f__Sphingomonadaceae;g__Novosphingobium;s__
d.bin.60	87.5	1.851	97171	2668301	d__Bacteria;p__Armatimonadota;c__Fimbriimonadia;o__Fimbriimonadales;f__Fimbriimonadaceae;g__;s__
d.bin.62	75.72	0.925	16437	3334330	d__Bacteria;p__Dormibacterota;c__Dormibacteria;o__Dormibacterales;f__Dormibacteraceae;g__Palsa-872;s__
d.bin.63	77.35	3.2	8055	2317255	d__Archaea;p__Thermoplasmatota;c__SW-10-69-26;o__;f__;g__;s__
d.bin.64	86.82	3.719	10605	4900962	d__Bacteria;p__Verrucomicrobiota;c__Verrucomicrobiae;o__Pedosphaerales;f__AV2;g__;s__
d.bin.65	78.55	4.08	22976	6203608	d__Bacteria;p__Planctomycetota;c__MHYJ01;o__MHYJ01;f__;g__;s__
d.bin.7	70.33	3.508	11440	5818284	d__Bacteria;p__Myxococcota;c__Polyangia;o__Palsa-1104;f__Fen-1088;g__;s__
d.bin.74	83.38	4.301	16824	5922788	d__Bacteria;p__Planctomycetota;c__SZUA-567;o__;f__;g__;s__
d.bin.75	86.13	2.841	28263	4612748	d__Bacteria;p__Methylomirabilota;c__Methylomirabilia;o__Rokubacteriales;f__GWA2-73-35;g__;s__
d.bin.76	72.53	2.84	12357	3366659	d__Bacteria;p__Planctomycetota;c__Phycisphaerae;o__Phycisphaerales;f__SM1A02;g__JACMLW01;s__
d.bin.77	79.92	2.709	16383	4618961	d__Bacteria;p__Actinobacteriota;c__Thermoleophilia;o__Gaiellales;f__;g__;s__
d.bin.81	81.4	3.048	6675	3107928	d__Bacteria;p__Proteobacteria;c__Gammaproteobacteria;o__Burkholderiales;f__UKL13-2;g__GR16-43;s__
d.bin.88	71.36	1.724	32337	4248658	d__Bacteria;p__Gemmatimonadota;c__Gemmatimonadetes;o__Gemmatimonadales;f__GWC2-71-9;g__JABFSM01;s__
d.bin.9	83.58	1.116	8488	3872764	d__Bacteria;p__Proteobacteria;c__Gammaproteobacteria;o__Burkholderiales;f__SG8-39;g__SCGC-AG-212-J23;s__
d.bin.91	75.75	3.138	6779	2661686	d__Bacteria;p__Proteobacteria;c__Alphaproteobacteria;o__Caulobacterales;f__Hyphomonadaceae;g__Terricaulis;s__
d.bin.92	87.15	1.695	18580	2707685	d__Bacteria;p__Proteobacteria;c__Gammaproteobacteria;o__Burkholderiales;f__Casimicrobiaceae;g__VBCG01;s__
d.bin.94	75.15	3.448	8625	4257486	d__Bacteria;p__Proteobacteria;c__Gammaproteobacteria;o__Steroidobacterales;f__Steroidobacteraceae;g__CADEED01;s__
d.bin.95	72.72	3.418	29981	5067573	d__Bacteria;p__Acidobacteriota;c__Vicinamibacteria;o__Vicinamibacterales;f__2-12-FULL-66-21;g__;s__
d.bin.97	89.73	2.611	29775	5377980	d__Bacteria;p__Acidobacteriota;c__Acidobacteriae;o__Acidobacteriales;f__Koribacteraceae;g__;s__
d.bin.99	81.12	3.803	9949	4076459	d__Bacteria;p__Proteobacteria;c__Alphaproteobacteria;o__Rhizobiales;f__Rhizobiaceae;g__Rhizobium;s__Rhizobium tubonense
d.bin.112	90.32	5.08	14214	6637615	d__Bacteria;p__Actinobacteriota;c__Actinomycetia;o__Streptosporangiales;f__Streptosporangiaceae;g__UBA9676;s__
d.bin.12	97.43	5.175	143903	5471893	d__Bacteria;p__Acidobacteriota;c__Blastocatellia;o__Pyrinomonadales;f__Pyrinomonadaceae;g__JACVRN01;s__
d.bin.133	95.05	5.792	16853	4719849	d__Bacteria;p__Proteobacteria;c__Gammaproteobacteria;o__Steroidobacterales;f__Steroidobacteraceae;g__CAILZL01;s__
d.bin.138	93.7	5.555	27687	7345927	d__Bacteria;p__Acidobacteriota;c__Blastocatellia;o__UBA7656;f__UBA7656;g__;s__
d.bin.143	93.49	9.139	40603	6384206	d__Bacteria;p__Planctomycetota;c__MHYJ01;o__MHYJ01;f__;g__;s__
d.bin.173	93.35	6.915	22358	4182237	d__Bacteria;p__Actinobacteriota;c__Acidimicrobiia;o__Acidimicrobiales;f__JACDCH01;g__;s__
d.bin.183	92.87	5.54	24120	7383662	d__Bacteria;p__Verrucomicrobiota;c__Verrucomicrobiae;o__Pedosphaerales;f__UBA8199;g__PSRM01;s__
d.bin.186	93	7.297	11679	4894920	d__Bacteria;p__Actinobacteriota;c__Actinomycetia;o__Propionibacteriales;f__Propionibacteriaceae;g__;s__
d.bin.188	91.56	5.488	12835	3782630	d__Bacteria;p__Actinobacteriota;c__Thermoleophilia;o__Gaiellales;f__;g__;s__
d.bin.215	97.95	6.14	47905	9067317	d__Bacteria;p__Acidobacteriota;c__Acidobacteriae;o__Bryobacterales;f__Bryobacteraceae;g__Solibacter;s__
d.bin.235	96.62	7.551	15769	4752520	d__Bacteria;p__Verrucomicrobiota;c__Verrucomicrobiae;o__Chthoniobacterales;f__UBA10450;g__;s__
d.bin.244	93.06	7.264	25733	10743374	d__Bacteria;p__Acidobacteriota;c__Blastocatellia;o__UBA7656;f__UBA7656;g__;s__
d.bin.254	91.32	9.9	17217	4627532	d__Bacteria;p__Bacteroidota;c__Bacteroidia;o__Chitinophagales;f__Chitinophagaceae;g__;s__
d.bin.304	93.01	9.36	14739	7775321	d__Bacteria;p__Verrucomicrobiota;c__Verrucomicrobiae;o__Pedosphaerales;f__UBA11358;g__SCTL01;s__
d.bin.307	96.62	6.576	47550	7207281	d__Bacteria;p__Verrucomicrobiota;c__Verrucomicrobiae;o__Pedosphaerales;f__UBA8199;g__;s__
d.bin.308	92.12	7.52	30217	7651951	d__Bacteria;p__Planctomycetota;c__MHYJ01;o__MHYJ01;f__MHYJ01;g__;s__
d.bin.309	93.84	5.037	56078	4987386	d__Bacteria;p__Proteobacteria;c__Gammaproteobacteria;o__Steroidobacterales;f__Steroidobacteraceae;g__;s__
d.bin.343	91.42	6.837	42311	4163955	d__Bacteria;p__Acidobacteriota;c__Acidobacteriae;o__UBA7541;f__UBA7541;g__;s__
d.bin.345	91.45	6.837	132112	7765963	d__Bacteria;p__Acidobacteriota;c__Blastocatellia;o__UBA7656;f__UBA7656;g__UBA7656;s__
d.bin.35	90.3	6.016	76125	6865025	d__Bacteria;p__Planctomycetota;c__MHYJ01;o__MHYJ01;f__;g__;s__
d.bin.353	97.88	9.256	63162	11467018	d__Bacteria;p__Verrucomicrobiota;c__Verrucomicrobiae;o__Pedosphaerales;f__SIBE01;g__;s__
d.bin.366	91.13	5.569	14039	6763879	d__Bacteria;p__Verrucomicrobiota;c__Verrucomicrobiae;o__Pedosphaerales;f__;g__;s__
d.bin.379	90.13	5.406	14155	2726277	d__Bacteria;p__Proteobacteria;c__Alphaproteobacteria;o__Rhizobiales;f__Xanthobacteraceae;g__Palsa-892;s__
d.bin.380	98.64	5.878	48510	7842277	d__Bacteria;p__Verrucomicrobiota;c__Verrucomicrobiae;o__Pedosphaerales;f__SIBH01;g__;s__
d.bin.384	91.61	5.829	18025	9727001	d__Bacteria;p__Myxococcota;c__Polyangia;o__;f__;g__;s__
d.bin.399	93.68	9.868	27318	11460751	d__Bacteria;p__Acidobacteriota;c__Acidobacteriae;o__Bryobacterales;f__Bryobacteraceae;g__Solibacter;s__
d.bin.44	95.57	5.595	47203	4924314	d__Bacteria;p__Proteobacteria;c__Gammaproteobacteria;o__Steroidobacterales;f__Steroidobacteraceae;g__;s__
d.bin.6	96.26	7.55	20631	3754575	d__Bacteria;p__Proteobacteria;c__Alphaproteobacteria;o__Rhizobiales;f__Aestuariivirgaceae;g__CABJBCQ01;s__
d.bin.71	94.13	6.257	22385	7501934	d__Bacteria;p__Proteobacteria;c__Gammaproteobacteria;o__Burkholderiales;f__SG8-41;g__SG8-41;s__
d.bin.84	92.64	5.913	15218	6879907	d__Bacteria;p__Planctomycetota;c__MHYJ01;o__MHYJ01;f__;g__;s__
d.bin.96	92.3	6.153	52094	6647618	d__Bacteria;p__Acidobacteriota;c__Vicinamibacteria;o__Fen-336;f__Fen-336;g__AA32;s__
d.bin.10	76.77	8.725	9055	10580307	d__Bacteria;p__Myxococcota;c__Polyangia;o__Haliangiales;f__Haliangiaceae;g__JABFXX01;s__
d.bin.101	74.16	6.143	7092	3588281	d__Bacteria;p__Gemmatimonadota;c__Gemmatimonadetes;o__Gemmatimonadales;f__GWC2-71-9;g__DSTP01;s__
d.bin.114	86.41	6.353	6026	5147540	d__Bacteria;p__Planctomycetota;c__UBA1135;o__UBA1135;f__GCA-002686595;g__;s__
d.bin.119	73.36	8.903	4809	7713280	d__Bacteria;p__Actinobacteriota;c__Actinomycetia;o__Mycobacteriales;f__Pseudonocardiaceae;g__Pseudonocardia;s__
d.bin.120	76.19	5.128	9676	3483817	d__Bacteria;p__Acidobacteriota;c__Vicinamibacteria;o__Vicinamibacterales;f__UBA2999;g__;s__
d.bin.122	76.63	6.267	14505	3353446	d__Bacteria;p__Acidobacteriota;c__Mor1;o__Mor1;f__Mor1;g__;s__
d.bin.125	83.33	7.004	9997	8575235	d__Bacteria;p__Proteobacteria;c__Gammaproteobacteria;o__Steroidobacterales;f__Steroidobacteraceae;g__Steroidobacter_A;s__
d.bin.128	84.65	6.043	16955	4004059	d__Bacteria;p__Gemmatimonadota;c__Gemmatimonadetes;o__Gemmatimonadales;f__GWC2-71-9;g__SHZT01;s__
d.bin.145	83.71	8.547	10785	5441713	d__Bacteria;p__Acidobacteriota;c__Vicinamibacteria;o__Fen-336;f__Fen-336;g__;s__
d.bin.148	76.26	6.837	10703	7131304	d__Bacteria;p__Methylomirabilota;c__Methylomirabilia;o__Rokubacteriales;f__;g__;s__
d.bin.149	78.23	8.41	6063	5425714	d__Bacteria;p__Desulfobacterota_B;c__Binatia;o__HRBIN30;f__HRBIN30;g__;s__
d.bin.150	83.38	7.636	9554	2634842	d__Bacteria;p__Proteobacteria;c__Alphaproteobacteria;o__Rhizobiales;f__Methyloligellaceae;g__Methyloceanibacter;s__
d.bin.151	70.5	6.451	4204	4377905	d__Bacteria;p__Myxococcota;c__XYA12-FULL-58-9;o__XYA12-FULL-58-9;f__XYA12-FULL-58-9;g__;s__
d.bin.166	70.32	5.172	14242	3986436	d__Bacteria;p__Acidobacteriota;c__Acidobacteriae;o__UBA7541;f__UBA7541;g__UBA7541;s__
d.bin.169	77.4	5.028	6881	2143780	d__Bacteria;p__Actinobacteriota;c__Thermoleophilia;o__Gaiellales;f__Gaiellaceae;g__;s__
d.bin.177	73.09	9.641	5458	3520279	d__Bacteria;p__Proteobacteria;c__Alphaproteobacteria;o__Sphingomonadales;f__Sphingomonadaceae;g__Sphingomonas_B;s__
d.bin.179	81.37	5.172	42318	6603444	d__Bacteria;p__Proteobacteria;c__Alphaproteobacteria;o__Rhizobiales;f__Labraceae;g__Labrys;s__
d.bin.189	77.63	8.255	5270	3440833	d__Bacteria;p__Proteobacteria;c__Alphaproteobacteria;o__Rhizobiales;f__Xanthobacteraceae;g__Pseudolabrys;s__
d.bin.19	71.06	7.092	5854	2910994	d__Bacteria;p__Gemmatimonadota;c__Gemmatimonadetes;o__Gemmatimonadales;f__GWC2-71-9;g__;s__
d.bin.191	80.77	5.726	45974	5361575	d__Bacteria;p__Acidobacteriota;c__Vicinamibacteria;o__Vicinamibacterales;f__UBA2999;g__;s__
d.bin.195	73.21	8.228	4603	2038447	d__Bacteria;p__Bacteroidota;c__UBA10030;o__UBA10030;f__UBA10030;g__;s__
d.bin.20	71.03	5.172	13670	3497837	d__Bacteria;p__Proteobacteria;c__Gammaproteobacteria;o__Xanthomonadales;f__Rhodanobacteraceae;g__;s__
d.bin.201	81.39	7.615	7846	6615294	d__Bacteria;p__Proteobacteria;c__Gammaproteobacteria;o__Burkholderiales;f__SHXO01;g__;s__
d.bin.207	85.13	5.128	19588	8227332	d__Bacteria;p__Acidobacteriota;c__Blastocatellia;o__UBA7656;f__UBA7656;g__;s__
d.bin.21	89.5	7.15	12869	3374397	d__Bacteria;p__Actinobacteriota;c__Acidimicrobiia;o__Acidimicrobiales;f__JACDEA01;g__JACDEA01;s__
d.bin.213	79.05	6.451	5793	5296399	d__Bacteria;p__Planctomycetota;c__MHYJ01;o__MHYJ01;f__;g__;s__
d.bin.218	84.59	5.494	11286	6014434	d__Bacteria;p__Gemmatimonadota;c__Gemmatimonadetes;o__Gemmatimonadales;f__GWC2-71-9;g__JABFSM01;s__
d.bin.219	84.87	6.962	7560	6145632	d__Bacteria;p__Acidobacteriota;c__Blastocatellia;o__UBA7656;f__UBA7656;g__;s__
d.bin.22	73.95	6.41	7927	4017160	d__Bacteria;p__Acidobacteriota;c__Blastocatellia;o__Pyrinomonadales;f__Pyrinomonadaceae;g__QHXM01;s__
d.bin.220	77.58	5.172	12059	1482368	d__Bacteria;p__Chlamydiota;c__Chlamydiia;o__Chlamydiales;f__Rhabdochlamydiaceae;g__PALSA-1444;s__
d.bin.221	82.69	6.267	48458	6676746	d__Bacteria;p__Acidobacteriota;c__Vicinamibacteria;o__Vicinamibacterales;f__UBA2999;g__Gp6-AA45;s__
d.bin.223	82.22	7.226	20436	3042727	d__Bacteria;p__Acidobacteriota;c__Blastocatellia;o__Pyrinomonadales;f__Pyrinomonadaceae;g__OLB17;s__
d.bin.227	87.86	5.93	12738	3422710	d__Bacteria;p__Proteobacteria;c__Gammaproteobacteria;o__Burkholderiales;f__SG8-39;g__;s__
d.bin.228	79.49	6.617	6671	3891212	d__Bacteria;p__Bacteroidota;c__Bacteroidia;o__Cytophagales;f__Cyclobacteriaceae;g__ELB16-189;s__
d.bin.232	71.47	6.935	6063	5625820	d__Bacteria;p__Myxococcota;c__Polyangia;o__Polyangiales;f__Polyangiaceae;g__;s__
d.bin.238	79.42	9.829	6459	6694053	d__Bacteria;p__Acidobacteriota;c__Vicinamibacteria;o__Vicinamibacterales;f__UBA2999;g__12-FULL-67-14b;s__
d.bin.239	74.13	8.62	7414	3470215	d__Bacteria;p__Eisenbacteria;c__RBG-16-71-46;o__RBG-16-71-46;f__RBG-16-71-46;g__CAIXRL01;s__
d.bin.246	75.22	5.792	6499	2411225	d__Bacteria;p__Actinobacteriota;c__Thermoleophilia;o__Gaiellales;f__Gaiellaceae;g__JACCRW01;s__
d.bin.260	76.49	7.327	19626	3353396	d__Bacteria;p__Actinobacteriota;c__Thermoleophilia;o__Gaiellales;f__Gaiellaceae;g__Palsa-739;s__
d.bin.262	74.82	6.011	12115	3393656	d__Bacteria;p__Planctomycetota;c__UBA1135;o__UBA1135;f__GCA-002686595;g__;s__
d.bin.263	73.92	9.846	5821	4569640	d__Bacteria;p__Proteobacteria;c__Alphaproteobacteria;o__ATCC43930;f__Stellaceae;g__AP-15;s__
d.bin.272	81.29	6.609	18471	2308630	d__Bacteria;p__Actinobacteriota;c__Thermoleophilia;o__Solirubrobacterales;f__70-9;g__;s__
d.bin.275	78.9	6.451	7995	6995655	d__Bacteria;p__Myxococcota;c__Polyangia;o__Polyangiales;f__Polyangiaceae;g__;s__
d.bin.278	73.54	8.14	4612	3308994	d__Bacteria;p__Planctomycetota;c__Phycisphaerae;o__Phycisphaerales;f__SM1A02;g__;s__
d.bin.284	82.05	6.188	11741	3281574	d__Bacteria;p__Proteobacteria;c__Alphaproteobacteria;o__Micropepsales;f__Micropepsaceae;g__Rhizomicrobium;s__
d.bin.285	75.39	5.6	10301	2426680	d__Archaea;p__Thermoplasmatota;c__Thermoplasmata;o__DTKX01;f__;g__;s__
d.bin.291	89.57	6.196	25967	7694558	d__Bacteria;p__Acidobacteriota;c__Vicinamibacteria;o__Vicinamibacterales;f__2-12-FULL-66-21;g__2-12-FULL-66-21;s__
d.bin.293	82	8.791	5900	2386581	d__Bacteria;p__Eisenbacteria;c__RBG-16-71-46;o__SZUA-252;f__SZUA-252;g__WS-7;s__
d.bin.296	73.18	8.771	4868	5519613	d__Bacteria;p__Acidobacteriota;c__Acidobacteriae;o__20CM-2-55-15;f__20CM-2-55-15;g__;s__
d.bin.297	78.32	5.116	10204	10789637	d__Bacteria;p__Actinobacteriota;c__Actinomycetia;o__Mycobacteriales;f__Micromonosporaceae;g__Actinoplanes;s__
d.bin.30	72.41	6.896	3798	4276329	d__Bacteria;p__Proteobacteria;c__Gammaproteobacteria;o__Nevskiales;f__Nevskiaceae;g__Hydrocarboniphaga;s__
d.bin.305	81.69	5.322	10616	8354530	d__Bacteria;p__Myxococcota;c__Polyangia;o__Polyangiales;f__Sandaracinaceae;g__;s__
d.bin.306	70.04	7.991	7818	1528218	d__Bacteria;p__Proteobacteria;c__Alphaproteobacteria;o__Rhizobiales;f__Methyloligellaceae;g__Methyloceanibacter;s__
d.bin.31	82.45	8.692	11173	2322256	d__Bacteria;p__Nitrospirota;c__Nitrospiria;o__Nitrospirales;f__Nitrospiraceae;g__2-02-FULL-62-14;s__
d.bin.319	82.85	5.797	7498	5552015	d__Bacteria;p__Acidobacteriota;c__Blastocatellia;o__UBA7656;f__UBA7656;g__;s__
d.bin.335	75.41	8.119	8463	6396092	d__Bacteria;p__Methylomirabilota;c__Methylomirabilia;o__Rokubacteriales;f__GWA2-73-35;g__;s__
d.bin.338	85.78	5.58	13954	5617568	d__Bacteria;p__Proteobacteria;c__Gammaproteobacteria;o__Burkholderiales;f__SG8-41;g__;s__
d.bin.342	89.1	5.466	8873	5248142	d__Bacteria;p__Acidobacteriota;c__Acidobacteriae;o__Acidobacteriales;f__Gp1-AA117;g__Gp1-AA17;s__
d.bin.351	84.37	9.615	13750	6670586	d__Bacteria;p__Acidobacteriota;c__Vicinamibacteria;o__Vicinamibacterales;f__UBA2999;g__2-02-FULL-65-29;s__
d.bin.352	71.2	7.741	9755	8009123	d__Bacteria;p__Myxococcota;c__WYAZ01;o__WYAZ01;f__WYAZ01;g__;s__
d.bin.358	70.68	6.896	18796	6739335	d__Bacteria;p__Acidobacteriota;c__Vicinamibacteria;o__Vicinamibacterales;f__SCN-69-37;g__;s__
d.bin.362	74.92	7.471	7716	5037847	d__Bacteria;p__Acidobacteriota;c__Vicinamibacteria;o__Fen-336;f__Fen-336;g__AA29;s__
d.bin.364	73.31	6.273	6368	5577486	d__Bacteria;p__Acidobacteriota;c__Acidobacteriae;o__Acidobacteriales;f__Koribacteraceae;g__QIAJ01;s__
d.bin.371	76.14	7.264	16168	4549902	d__Bacteria;p__Acidobacteriota;c__Vicinamibacteria;o__Fen-336;f__Fen-336;g__;s__
d.bin.372	88.83	9.385	10803	1694151	d__Archaea;p__Thermoproteota;c__Nitrososphaeria;o__Nitrososphaerales;f__Nitrosopumilaceae;g__Nitrosotalea;s__
d.bin.374	72.34	7.052	5796	5169935	d__Bacteria;p__Proteobacteria;c__Alphaproteobacteria;o__Reyranellales;f__Reyranellaceae;g__Reyranella;s__
d.bin.377	82.58	5.799	7028	3859444	d__Bacteria;p__Acidobacteriota;c__Acidobacteriae;o__UBA7541;f__UBA7541;g__;s__
d.bin.381	84.93	5.101	8645	2181552	d__Bacteria;p__Nitrospirota;c__Nitrospiria;o__;f__;g__;s__
d.bin.382	87.79	5.216	11491	6227072	d__Bacteria;p__Planctomycetota;c__Planctomycetes;o__Gemmatales;f__Gemmataceae;g__Gemmata;s__
d.bin.385	70.88	5.148	4334	5786221	d__Bacteria;p__Chloroflexota;c__UBA6077;o__UBA6077;f__CF-72;g__CF-72;s__
d.bin.386	71.89	6.353	8652	3403861	d__Bacteria;p__Planctomycetota;c__Phycisphaerae;o__Phycisphaerales;f__SM1A02;g__;s__
d.bin.390	76.05	5.494	26390	3005878	d__Bacteria;p__Gemmatimonadota;c__Gemmatimonadetes;o__Gemmatimonadales;f__GWC2-71-9;g__20CM-2-65-7;s__
d.bin.398	86.42	7.033	21670	6664330	d__Bacteria;p__Methylomirabilota;c__Methylomirabilia;o__Rokubacteriales;f__GWA2-73-35;g__AR5;s__
d.bin.403	72.15	9.809	5497	4548265	d__Bacteria;p__Proteobacteria;c__Gammaproteobacteria;o__Burkholderiales;f__Burkholderiaceae;g__Ramlibacter;s__
d.bin.404	83.36	5.363	9381	6200220	d__Bacteria;p__Chloroflexota;c__Anaerolineae;o__Anaerolineales;f__EnvOPS12;g__UBA12294;s__
d.bin.45	84.74	6.139	6464	2541641	d__Bacteria;p__Verrucomicrobiota;c__Verrucomicrobiae;o__Palsa-1439;f__Palsa-1439;g__CAINDI01;s__
d.bin.52	70.54	7.035	11218	5835593	d__Bacteria;p__Proteobacteria;c__Alphaproteobacteria;o__Reyranellales;f__Reyranellaceae;g__;s__
d.bin.56	73.1	6.753	7568	2807902	d__Bacteria;p__Proteobacteria;c__Alphaproteobacteria;o__Micavibrionales;f__Micavibrionaceae;g__;s__
d.bin.57	84.63	5.494	20333	6017347	d__Bacteria;p__Gemmatimonadota;c__Gemmatimonadetes;o__Gemmatimonadales;f__Gemmatimonadaceae;g__AG2;s__
d.bin.61	89.56	9.722	23479	3160714	d__Bacteria;p__Dormibacterota;c__Dormibacteria;o__Dormibacterales;f__Dormibacteraceae;g__40CM-4-65-16;s__
d.bin.66	77.26	9.545	10483	2667371	d__Bacteria;p__Nitrospirota;c__Nitrospiria;o__Nitrospirales;f__NS-4;g__NS-11;s__
d.bin.73	74.34	6.463	14533	9320944	d__Bacteria;p__Acidobacteriota;c__Vicinamibacteria;o__Vicinamibacterales;f__;g__;s__
d.bin.78	76.29	7.811	6431	6439201	d__Bacteria;p__Desulfobacterota_B;c__Binatia;o__HRBIN30;f__;g__;s__
d.bin.79	70.03	5.555	4378	3724292	d__Bacteria;p__Acidobacteriota;c__Thermoanaerobaculia;o__Gp7-AA8;f__Gp7-AA8;g__;s__
d.bin.82	72.46	5.434	8735	3029206	d__Bacteria;p__Proteobacteria;c__Alphaproteobacteria;o__Micropepsales;f__Micropepsaceae;g__Rhizomicrobium;s__
d.bin.83	72.95	8.686	4851	4123980	d__Bacteria;p__Proteobacteria;c__Alphaproteobacteria;o__Rhizobiales;f__Beijerinckiaceae;g__Roseiarcus;s__
d.bin.85	88.88	6.207	27517	6615233	d__Bacteria;p__Acidobacteriota;c__Vicinamibacteria;o__Fen-336;f__Fen-336;g__;s__
d.bin.90	87.57	8.421	7729	4703148	d__Bacteria;p__Proteobacteria;c__Alphaproteobacteria;o__Rhizobiales;f__Hyphomicrobiaceae;g__Hyphomicrobium;s__
d.bin.93	82.81	8.891	9071	4376628	d__Bacteria;p__Eisenbacteria;c__RBG-16-71-46;o__RBG-16-71-46;f__RBG-16-71-46;g__WS-3;s__
d.bin.98	70.76	6.681	6451	1972262	d__Bacteria;p__Actinobacteriota;c__Thermoleophilia;o__Solirubrobacterales;f__70-9;g__;s__

## Sheet: e-B.napus_G210
bin	completeness	contamination	N50	size	classification
e.bin.1	96.24	4.423	106570	5155075	d__Bacteria;p__Proteobacteria;c__Gammaproteobacteria;o__Steroidobacterales;f__Steroidobacteraceae;g__;s__
e.bin.100	95.29	1.84	14825	5976584	d__Bacteria;p__Proteobacteria;c__Alphaproteobacteria;o__Acetobacterales;f__Acetobacteraceae;g__Palsa-883;s__
e.bin.108	100	1.098	16958	2733614	d__Bacteria;p__Eisenbacteria;c__RBG-16-71-46;o__SZUA-252;f__SZUA-252;g__WS-7;s__
e.bin.111	94.02	1.368	18263	2678917	d__Bacteria;p__Actinobacteriota;c__Actinomycetia;o__Actinomycetales;f__Microbacteriaceae;g__Lysinimonas_A;s__
e.bin.114	96.15	2.841	12111	5832741	d__Bacteria;p__Bacteroidota;c__Kapabacteria;o__OLB7;f__OLB7;g__;s__
e.bin.116	95.8	4.359	65109	4909354	d__Bacteria;p__Proteobacteria;c__Gammaproteobacteria;o__Steroidobacterales;f__Steroidobacteraceae;g__Bog-1198;s__
e.bin.117	98.2	2.162	39563	7057193	d__Bacteria;p__Verrucomicrobiota;c__Verrucomicrobiae;o__Pedosphaerales;f__SIBH01;g__;s__
e.bin.122	93.73	2.854	31643	4759416	d__Bacteria;p__Proteobacteria;c__Gammaproteobacteria;o__Burkholderiales;f__Burkholderiaceae;g__Ramlibacter;s__
e.bin.125	93.92	1.282	20343	3795688	d__Bacteria;p__Actinobacteriota;c__Acidimicrobiia;o__Acidimicrobiales;f__JACDCH01;g__;s__
e.bin.134	95.37	1.656	16880	2997701	d__Bacteria;p__Eremiobacterota;c__Eremiobacteria;o__Baltobacterales;f__Baltobacteraceae;g__Cybelea;s__
e.bin.135	94.27	1.476	76096	3564397	d__Bacteria;p__Proteobacteria;c__Gammaproteobacteria;o__Xanthomonadales;f__Rhodanobacteraceae;g__;s__
e.bin.14	94.22	4.532	30595	10695230	d__Bacteria;p__Acidobacteriota;c__Acidobacteriae;o__Bryobacterales;f__Bryobacteraceae;g__Solibacter;s__
e.bin.141	95.02	1.61	74861	6877596	d__Bacteria;p__Proteobacteria;c__Alphaproteobacteria;o__Rhizobiales;f__Xanthobacteraceae;g__Bradyrhizobium;s__
e.bin.147	92.04	2.944	9147	6442473	d__Bacteria;p__Planctomycetota;c__UBA1135;o__UBA1135;f__GCA-002686595;g__;s__
e.bin.149	92.23	1.709	16941	5344331	d__Bacteria;p__Acidobacteriota;c__Acidobacteriae;o__Acidobacteriales;f__Gp1-AA117;g__Gp1-AA17;s__
e.bin.150	96.34	2.233	16770	6479546	d__Bacteria;p__Bacteroidota;c__Bacteroidia;o__Chitinophagales;f__Chitinophagaceae;g__Puia;s__
e.bin.156	96.34	0.144	78859	2910077	d__Bacteria;p__Proteobacteria;c__Alphaproteobacteria;o__Micropepsales;f__Micropepsaceae;g__Rhizomicrobium;s__
e.bin.166	95.24	2.564	31400	7260704	d__Bacteria;p__Acidobacteriota;c__Blastocatellia;o__Pyrinomonadales;f__Pyrinomonadaceae;g__UBA11741;s__
e.bin.168	95.09	1.27	65624	4163288	d__Bacteria;p__Proteobacteria;c__Alphaproteobacteria;o__Rhizobiales;f__Devosiaceae;g__Devosia_A;s__
e.bin.174	96.17	2.732	125132	3536075	d__Bacteria;p__Bacteroidota;c__UBA10030;o__UBA10030;f__SZUA-254;g__;s__
e.bin.176	93.57	2.077	18809	3837007	d__Bacteria;p__Proteobacteria;c__Gammaproteobacteria;o__Burkholderiales;f__Casimicrobiaceae;g__VBCG01;s__
e.bin.180	95.77	0	102415	2244071	d__Bacteria;p__Actinobacteriota;c__Actinomycetia;o__Actinomycetales;f__Microbacteriaceae;g__Cryobacterium_B;s__
e.bin.182	90.59	2.922	10433	3664753	d__Bacteria;p__Proteobacteria;c__Alphaproteobacteria;o__Caulobacterales;f__Hyphomonadaceae;g__;s__
e.bin.183	96.15	1.282	15387	4121147	d__Bacteria;p__Acidobacteriota;c__Thermoanaerobaculia;o__UBA5066;f__Gp7-AA6;g__;s__
e.bin.184	94.28	3.472	50773	8026555	d__Bacteria;p__Acidobacteriota;c__Blastocatellia;o__Pyrinomonadales;f__Pyrinomonadaceae;g__;s__
e.bin.185	95.68	0.985	29730	4942757	d__Bacteria;p__Bacteroidota;c__Bacteroidia;o__Chitinophagales;f__Chitinophagaceae;g__Puia;s__
e.bin.188	92.71	0.498	47951	3131102	d__Bacteria;p__Proteobacteria;c__Alphaproteobacteria;o__Caulobacterales;f__Hyphomonadaceae;g__Terricaulis;s__
e.bin.190	97.53	0.027	356311	3956315	d__Bacteria;p__Bacteroidota;c__Bacteroidia;o__Chitinophagales;f__Chitinophagaceae;g__JJ008;s__
e.bin.192	97.14	0	256371	3908528	d__Bacteria;p__Bacteroidota;c__Bacteroidia;o__NS11-12g;f__UBA955;g__;s__
e.bin.195	90.2	1.994	29963	5583020	d__Bacteria;p__Acidobacteriota;c__Acidobacteriae;o__Acidobacteriales;f__Gp1-AA117;g__Gp1-AA17;s__
e.bin.2	92.3	3.361	24817	3914405	d__Bacteria;p__Gemmatimonadota;c__Gemmatimonadetes;o__Gemmatimonadales;f__GWC2-71-9;g__;s__
e.bin.200	93.39	0.434	40978	5120731	d__Bacteria;p__Proteobacteria;c__Alphaproteobacteria;o__ATCC43930;f__Stellaceae;g__;s__
e.bin.205	95.94	2.289	17196	4789082	d__Bacteria;p__Acidobacteriota;c__Thermoanaerobaculia;o__UBA5066;f__Gp7-AA6;g__;s__
e.bin.208	92.69	1.801	10111	6638272	d__Bacteria;p__Verrucomicrobiota;c__Verrucomicrobiae;o__Pedosphaerales;f__SIBH01;g__;s__
e.bin.209	90.43	3.472	22709	5243700	d__Bacteria;p__Acidobacteriota;c__Vicinamibacteria;o__Vicinamibacterales;f__UBA2999;g__Gp6-AA40;s__
e.bin.214	97.6	0.884	67205	4274110	d__Bacteria;p__Proteobacteria;c__Alphaproteobacteria;o__Micropepsales;f__Micropepsaceae;g__CAIYRG01;s__
e.bin.215	94.93	1.996	10864	4333227	d__Bacteria;p__Proteobacteria;c__Alphaproteobacteria;o__ATCC43930;f__Stellaceae;g__AP-15;s__
e.bin.221	94.67	2.324	13618	4518047	d__Bacteria;p__Planctomycetota;c__Phycisphaerae;o__UBA1845;f__UTPLA1;g__;s__
e.bin.225	91.64	1.709	147480	5703438	d__Bacteria;p__Acidobacteriota;c__Acidobacteriae;o__Acidobacteriales;f__Koribacteraceae;g__Sulfotelmatobacter;s__
e.bin.226	95.86	0.869	38686	3417580	d__Bacteria;p__Proteobacteria;c__Alphaproteobacteria;o__Micropepsales;f__Micropepsaceae;g__Rhizomicrobium;s__
e.bin.233	94.01	3.573	19521	3761920	d__Bacteria;p__Acidobacteriota;c__Mor1;o__Mor1;f__;g__;s__
e.bin.234	96.7	2.197	26484	5210544	d__Bacteria;p__Gemmatimonadota;c__Gemmatimonadetes;o__Gemmatimonadales;f__Gemmatimonadaceae;g__AG2;s__
e.bin.239	98.31	1.709	229928	4863287	d__Bacteria;p__Acidobacteriota;c__Acidobacteriae;o__Acidobacteriales;f__Koribacteraceae;g__Sulfotelmatobacter;s__
e.bin.240	94.2	2.735	35465	5327843	d__Bacteria;p__Acidobacteriota;c__Acidobacteriae;o__UBA7541;f__UBA7541;g__UBA7541;s__
e.bin.243	95.72	1.709	377649	4950129	d__Bacteria;p__Acidobacteriota;c__Acidobacteriae;o__UBA7541;f__UBA7541;g__UBA7541;s__
e.bin.245	91.8	4.769	13931	7779471	d__Bacteria;p__Planctomycetota;c__Planctomycetes;o__Planctomycetales;f__UBA10511;g__SIAF01;s__
e.bin.248	99.14	0.854	117939	5495887	d__Bacteria;p__Acidobacteriota;c__Acidobacteriae;o__Acidobacteriales;f__Koribacteraceae;g__JABDBE01;s__
e.bin.250	94.22	1.112	66238	3112086	d__Bacteria;p__Proteobacteria;c__Alphaproteobacteria;o__Rhizobiales;f__Methylopilaceae;g__Ga0077545;s__
e.bin.251	96.12	0.984	31053	3960479	d__Bacteria;p__Bacteroidota;c__Bacteroidia;o__AKYH767;f__B-17BO;g__;s__
e.bin.253	95.72	0.854	221106	4159488	d__Bacteria;p__Acidobacteriota;c__Acidobacteriae;o__UBA7541;f__UBA7541;g__;s__
e.bin.254	90.99	0.645	20692	2626400	d__Bacteria;p__Proteobacteria;c__Gammaproteobacteria;o__Xanthomonadales;f__Rhodanobacteraceae;g__66-474;s__
e.bin.257	90.15	1.107	45134	3787436	d__Bacteria;p__Proteobacteria;c__Alphaproteobacteria;o__Rhizobiales;f__Xanthobacteraceae;g__Pseudolabrys;s__
e.bin.258	97.6	1.098	393435	4044256	d__Bacteria;p__Gemmatimonadota;c__Gemmatimonadetes;o__Gemmatimonadales;f__GWC2-71-9;g__;s__
e.bin.26	92.13	3.418	11129	3443817	d__Bacteria;p__Acidobacteriota;c__Acidobacteriae;o__Acidobacteriales;f__Gp1-AA112;g__DSPA01;s__
e.bin.261	97.06	1.666	156466	3588943	d__Bacteria;p__Proteobacteria;c__Alphaproteobacteria;o__Micropepsales;f__Micropepsaceae;g__Rhizomicrobium;s__
e.bin.266	97.5	0.288	16396	2919610	d__Bacteria;p__Eremiobacterota;c__Eremiobacteria;o__Baltobacterales;f__Baltobacteraceae;g__Tumulicola;s__
e.bin.27	91.42	4.273	11156	4580792	d__Bacteria;p__Acidobacteriota;c__Thermoanaerobaculia;o__UBA5066;f__Gp7-AA6;g__;s__
e.bin.270	95.43	3.624	29993	4292104	d__Bacteria;p__Proteobacteria;c__Gammaproteobacteria;o__Xanthomonadales;f__Rhodanobacteraceae;g__;s__
e.bin.273	96.58	2.564	172522	4714719	d__Bacteria;p__Acidobacteriota;c__Acidobacteriae;o__UBA7541;f__UBA7541;g__Palsa-147;s__
e.bin.28	97.38	3.044	90225	9269108	d__Bacteria;p__Acidobacteriota;c__Thermoanaerobaculia;o__UBA5704;f__UBA5704;g__UBA5704;s__
e.bin.283	96.79	1.33	16453	4803673	d__Bacteria;p__Bacteroidota;c__Bacteroidia;o__Chitinophagales;f__Chitinophagaceae;g__Puia;s__
e.bin.286	94.3	2.929	19884	2600411	d__Bacteria;p__Proteobacteria;c__Alphaproteobacteria;o__Caulobacterales;f__Caulobacteraceae;g__NCED01;s__
e.bin.288	98.07	1.346	69084	3446793	d__Bacteria;p__Actinobacteriota;c__Actinomycetia;o__Actinomycetales;f__Microbacteriaceae;g__Protaetiibacter;s__
e.bin.289	90.59	3.76	42929	6847700	d__Bacteria;p__Acidobacteriota;c__Vicinamibacteria;o__Vicinamibacterales;f__UBA2999;g__2-02-FULL-65-29;s__
e.bin.295	91.17	1.709	193543	4964497	d__Bacteria;p__Acidobacteriota;c__Acidobacteriae;o__UBA7541;f__UBA7541;g__UBA7541;s__
e.bin.296	98.85	1.724	167248	6504218	d__Bacteria;p__Bacteroidota;c__Bacteroidia;o__Chitinophagales;f__Chitinophagaceae;g__Puia;s__
e.bin.297	93.49	1.055	33977	5770061	d__Bacteria;p__Proteobacteria;c__Alphaproteobacteria;o__Sphingomonadales;f__Sphingomonadaceae;g__Rhizorhabdus;s__
e.bin.3	93.93	4.968	43538	6372717	d__Bacteria;p__Proteobacteria;c__Alphaproteobacteria;o__Rhizobiales;f__Xanthobacteraceae;g__P52-10;s__
e.bin.303	94.88	2.741	21321	5067153	d__Bacteria;p__Proteobacteria;c__Alphaproteobacteria;o__Rhizobiales;f__Xanthobacteraceae;g__Bradyrhizobium;s__
e.bin.309	91.59	3.2	21481	3745099	d__Bacteria;p__Proteobacteria;c__Gammaproteobacteria;o__Burkholderiales;f__Burkholderiaceae;g__Ramlibacter;s__
e.bin.31	96.39	2.769	22183	8443007	d__Bacteria;p__Bacteroidota;c__Bacteroidia;o__Chitinophagales;f__Chitinophagaceae;g__Puia;s__
e.bin.310	98.9	2.747	182183	5259968	d__Bacteria;p__Fibrobacterota;c__Fibrobacteria;o__UBA11236;f__UBA11236;g__;s__
e.bin.326	92.21	1.864	17546	4246448	d__Bacteria;p__Proteobacteria;c__Gammaproteobacteria;o__Xanthomonadales;f__Ahniellaceae;g__;s__
e.bin.329	95.4	1.163	35496	3579369	d__Bacteria;p__Gemmatimonadota;c__Gemmatimonadetes;o__Gemmatimonadales;f__GWC2-71-9;g__;s__
e.bin.34	95.67	3.49	24750	5248938	d__Bacteria;p__Acidobacteriota;c__Acidobacteriae;o__Acidobacteriales;f__Koribacteraceae;g__Gp1-AA145;s__
e.bin.43	96.52	2.782	242848	5532716	d__Bacteria;p__Acidobacteriota;c__Blastocatellia;o__Pyrinomonadales;f__Pyrinomonadaceae;g__UBA11741;s__
e.bin.44	95.67	1.709	29820	4187205	d__Bacteria;p__Acidobacteriota;c__Acidobacteriae;o__Acidobacteriales;f__Koribacteraceae;g__JABCZH01;s__
e.bin.45	95.72	1.709	297068	5466553	d__Bacteria;p__Acidobacteriota;c__Acidobacteriae;o__UBA7541;f__UBA7541;g__UBA7541;s__
e.bin.46	97.29	4.093	27927	6517322	d__Bacteria;p__Verrucomicrobiota;c__Verrucomicrobiae;o__Pedosphaerales;f__SIBH01;g__;s__
e.bin.49	95.87	2.035	23443	3785837	d__Bacteria;p__Proteobacteria;c__Alphaproteobacteria;o__Rhizobiales;f__Aestuariivirgaceae;g__CABJBCQ01;s__
e.bin.5	91	3.644	22495	4028889	d__Bacteria;p__Gemmatimonadota;c__Gemmatimonadetes;o__Gemmatimonadales;f__GWC2-71-9;g__SHZT01;s__
e.bin.52	91.81	4.273	18508	6223727	d__Bacteria;p__Acidobacteriota;c__Thermoanaerobaculia;o__Gp7-AA8;f__Gp7-AA8;g__QHVT01;s__
e.bin.53	90.7	3.345	18166	3262693	d__Bacteria;p__Proteobacteria;c__Gammaproteobacteria;o__Burkholderiales;f__SG8-39;g__SCGC-AG-212-J23;s__
e.bin.57	90.82	1.335	10804	4628996	d__Bacteria;p__Acidobacteriota;c__Acidobacteriae;o__Acidobacteriales;f__Koribacteraceae;g__;s__
e.bin.63	93.76	2.218	106331	4063364	d__Bacteria;p__Proteobacteria;c__Alphaproteobacteria;o__Caulobacterales;f__Caulobacteraceae;g__Phenylobacterium;s__
e.bin.64	93.51	1.111	68770	8508268	d__Bacteria;p__Armatimonadota;c__SYMT01;o__SYMT01;f__SYMT01;g__;s__
e.bin.65	91.77	2.722	11188	5760626	d__Bacteria;p__Bacteroidota;c__Bacteroidia;o__Chitinophagales;f__Chitinophagaceae;g__46-32;s__
e.bin.7	91.25	2.192	59602	7466817	d__Bacteria;p__Acidobacteriota;c__Acidobacteriae;o__Bryobacterales;f__Bryobacteraceae;g__Solibacter;s__
e.bin.72	98.3	4.708	89269	5177855	d__Bacteria;p__Proteobacteria;c__Gammaproteobacteria;o__Xanthomonadales;f__Rhodanobacteraceae;g__Dokdonella_A;s__
e.bin.92	92.54	1.899	46506	5659573	d__Bacteria;p__Proteobacteria;c__Gammaproteobacteria;o__Burkholderiales;f__SHXO01;g__;s__
e.bin.96	95.29	2.38	29514	3904802	d__Bacteria;p__Gemmatimonadota;c__Gemmatimonadetes;o__Gemmatimonadales;f__Gemmatimonadaceae;g__UBA4720;s__
e.bin.98	93.06	2.136	13302	4500794	d__Bacteria;p__Actinobacteriota;c__Acidimicrobiia;o__Acidimicrobiales;f__Ilumatobacteraceae;g__;s__
e.bin.101	89.92	1.445	15747	4615705	d__Bacteria;p__Proteobacteria;c__Alphaproteobacteria;o__Rhizobiales;f__Rhizobiaceae;g__Rhizobium;s__Rhizobium tubonense
e.bin.103	79.31	0	11706	3861045	d__Bacteria;p__Gemmatimonadota;c__Gemmatimonadetes;o__Gemmatimonadales;f__GWC2-71-9;g__;s__
e.bin.104	89.04	2.988	12607	3885101	d__Bacteria;p__Bacteroidota;c__Bacteroidia;o__Chitinophagales;f__Chitinophagaceae;g__;s__
e.bin.105	88.39	4.605	10680	7242778	d__Bacteria;p__Acidobacteriota;c__Blastocatellia;o__UBA7656;f__UBA7656;g__;s__
e.bin.106	73.27	0	33645	5545808	d__Bacteria;p__Gemmatimonadota;c__Gemmatimonadetes;o__Gemmatimonadales;f__Gemmatimonadaceae;g__AG2;s__
e.bin.11	88.17	3.261	7424	2354229	d__Archaea;p__Thermoplasmatota;c__Thermoplasmata;o__DTKX01;f__;g__;s__
e.bin.110	72.25	4.521	11893	3631363	d__Bacteria;p__Acidobacteriota;c__Acidobacteriae;o__Bryobacterales;f__Bryobacteraceae;g__;s__
e.bin.112	78.22	2.991	10978	3110381	d__Bacteria;p__Acidobacteriota;c__Acidobacteriae;o__UBA7541;f__UBA7541;g__;s__
e.bin.113	89.91	4.58	39479	4068736	d__Bacteria;p__Proteobacteria;c__Gammaproteobacteria;o__Steroidobacterales;f__Steroidobacteraceae;g__;s__
e.bin.115	85.16	2.747	24084	2847082	d__Bacteria;p__Gemmatimonadota;c__Gemmatimonadetes;o__Gemmatimonadales;f__GWC2-71-9;g__Palsa-1233;s__
e.bin.119	83.51	2.197	23215	2649331	d__Bacteria;p__Gemmatimonadota;c__Gemmatimonadetes;o__Gemmatimonadales;f__GWC2-71-9;g__20CM-2-65-7;s__
e.bin.12	75.84	1.724	20174	4321956	d__Bacteria;p__Proteobacteria;c__Gammaproteobacteria;o__Steroidobacterales;f__Steroidobacteraceae;g__13-2-20CM-66-19;s__
e.bin.120	76.98	1.034	23402	2061314	d__Bacteria;p__Actinobacteriota;c__Thermoleophilia;o__Solirubrobacterales;f__70-9;g__SHVA01;s__
e.bin.121	79.52	4.166	8192	2826842	d__Bacteria;p__Proteobacteria;c__Alphaproteobacteria;o__Sphingomonadales;f__Sphingomonadaceae;g__Sphingomicrobium;s__
e.bin.123	81.55	0.378	8682	5088565	d__Bacteria;p__Planctomycetota;c__Phycisphaerae;o__UBA1161;f__UBA1161;g__;s__
e.bin.124	89.91	2.747	6899	3677706	d__Bacteria;p__Gemmatimonadota;c__Gemmatimonadetes;o__Gemmatimonadales;f__Gemmatimonadaceae;g__Palsa-1248;s__
e.bin.126	73.93	4.123	21525	3921292	d__Bacteria;p__Methylomirabilota;c__Methylomirabilia;o__Rokubacteriales;f__GWA2-73-35;g__;s__
e.bin.127	72	1.91	4936	2901147	d__Bacteria;p__Proteobacteria;c__Gammaproteobacteria;o__Xanthomonadales;f__Xanthomonadaceae;g__Stenotrophomonas;s__
e.bin.129	72.34	4.538	8488	4761890	d__Bacteria;p__Proteobacteria;c__Alphaproteobacteria;o__Rhizobiales;f__Xanthobacteraceae;g__Bradyrhizobium;s__
e.bin.131	77.28	2.606	5934	2758263	d__Bacteria;p__Proteobacteria;c__Gammaproteobacteria;o__Burkholderiales;f__UKL13-2;g__GR16-43;s__
e.bin.132	87.16	3.378	15379	4355888	d__Bacteria;p__Verrucomicrobiota;c__Verrucomicrobiae;o__Pedosphaerales;f__UBA3939;g__;s__
e.bin.133	87.79	2.617	10527	3012697	d__Bacteria;p__Acidobacteriota;c__Blastocatellia;o__Pyrinomonadales;f__Pyrinomonadaceae;g__OLB17;s__
e.bin.138	71.86	0	6941	5769279	d__Bacteria;p__Gemmatimonadota;c__Gemmatimonadetes;o__Gemmatimonadales;f__Gemmatimonadaceae;g__;s__
e.bin.139	86.74	4.7	10060	7443880	d__Bacteria;p__Acidobacteriota;c__Acidobacteriae;o__Acidobacteriales;f__Koribacteraceae;g__;s__
e.bin.142	76.12	2.103	9315	3553427	d__Bacteria;p__Proteobacteria;c__Alphaproteobacteria;o__Rhizobiales;f__Xanthobacteraceae;g__Bradyrhizobium;s__
e.bin.143	79.04	2.096	9951	5546226	d__Bacteria;p__Myxococcota;c__Polyangia;o__Palsa-1104;f__Fen-1088;g__;s__
e.bin.144	79.74	3.76	10206	5739516	d__Bacteria;p__Acidobacteriota;c__Vicinamibacteria;o__Vicinamibacterales;f__UBA2999;g__Gp6-AA45;s__
e.bin.145	75.65	0.826	6952	2391337	d__Bacteria;p__Proteobacteria;c__Gammaproteobacteria;o__Steroidobacterales;f__Steroidobacteraceae;g__FEN-1191;s__
e.bin.146	87.93	4.861	8214	6081386	d__Bacteria;p__Myxococcota;c__Polyangia;o__Polyangiales;f__Polyangiaceae;g__;s__
e.bin.148	76.88	1.724	33059	9914085	d__Bacteria;p__Proteobacteria;c__Gammaproteobacteria;o__Steroidobacterales;f__Steroidobacteraceae;g__;s__
e.bin.152	87.2	2.709	24039	4364319	d__Bacteria;p__Bacteroidota;c__Bacteroidia;o__Chitinophagales;f__Chitinophagaceae;g__Puia;s__
e.bin.153	84.34	3.928	12309	4292380	d__Bacteria;p__Proteobacteria;c__Alphaproteobacteria;o__Caulobacterales;f__Caulobacteraceae;g__Phenylobacterium;s__
e.bin.154	87.24	3.743	7814	6907412	d__Bacteria;p__Actinobacteriota;c__Actinomycetia;o__Streptosporangiales;f__Streptosporangiaceae;g__UBA9676;s__
e.bin.16	83.06	0.949	25453	3460540	d__Bacteria;p__Proteobacteria;c__Alphaproteobacteria;o__Rhizobiales;f__Xanthobacteraceae;g__Pseudolabrys;s__
e.bin.161	77.02	0	10762	2032323	d__Bacteria;p__Actinobacteriota;c__Thermoleophilia;o__Gaiellales;f__Gaiellaceae;g__AC-32;s__
e.bin.164	73.46	0	30942	9306722	d__Bacteria;p__Myxococcota;c__Polyangia;o__Haliangiales;f__Haliangiaceae;g__JABFXX01;s__
e.bin.165	77.04	2.777	8821	5025321	d__Bacteria;p__Acidobacteriota;c__Vicinamibacteria;o__Vicinamibacterales;f__SCN-69-37;g__;s__
e.bin.167	73.1	1.724	7527	4779638	d__Bacteria;p__Proteobacteria;c__Alphaproteobacteria;o__Dongiales;f__Dongiaceae;g__Hypericibacter;s__Hypericibacter terrae
e.bin.169	75.56	4.09	7297	4128868	d__Bacteria;p__Chloroflexota;c__Anaerolineae;o__Anaerolineales;f__EnvOPS12;g__;s__
e.bin.17	72.31	0.454	7298	2506454	d__Bacteria;p__Nitrospirota;c__Nitrospiria;o__Nitrospirales;f__Nitrospiraceae;g__Palsa-1315;s__
e.bin.171	79.69	1.7	5081	4948093	d__Bacteria;p__Verrucomicrobiota;c__Verrucomicrobiae;o__Verrucomicrobiales;f__Verrucomicrobiaceae;g__Prosthecobacter;s__
e.bin.172	87.87	2.176	10337	2835114	d__Bacteria;p__Proteobacteria;c__Alphaproteobacteria;o__Caulobacterales;f__Hyphomonadaceae;g__VFBF01;s__
e.bin.175	88.35	2.599	8523	4703514	d__Bacteria;p__Bacteroidota;c__Bacteroidia;o__Chitinophagales;f__Chitinophagaceae;g__;s__
e.bin.177	71.73	3.03	7570	2976158	d__Bacteria;p__Nitrospirota;c__Nitrospiria;o__Nitrospirales;f__Nitrospiraceae;g__Palsa-1315;s__
e.bin.178	84.55	2.631	9263	5126987	d__Bacteria;p__Acidobacteriota;c__Acidobacteriae;o__Bryobacterales;f__Bryobacteraceae;g__QHXW01;s__
e.bin.179	70.68	3.448	8216	3797312	d__Bacteria;p__Proteobacteria;c__Gammaproteobacteria;o__Steroidobacterales;f__Steroidobacteraceae;g__CAIKZZ01;s__
e.bin.18	85.99	0.581	12705	5784900	d__Bacteria;p__Planctomycetota;c__Planctomycetes;o__Gemmatales;f__Gemmataceae;g__Gemmata;s__
e.bin.187	71.6	1.648	6391	2958293	d__Bacteria;p__Eisenbacteria;c__RBG-16-71-46;o__RBG-16-71-46;f__RBG-16-71-46;g__WS-8;s__
e.bin.19	75.16	4.633	4763	4381727	d__Bacteria;p__Proteobacteria;c__Gammaproteobacteria;o__Burkholderiales;f__Burkholderiaceae;g__Rhizobacter;s__
e.bin.191	77.28	0.337	8123	2447315	d__Bacteria;p__Verrucomicrobiota;c__Verrucomicrobiae;o__Chthoniobacterales;f__UBA10450;g__AV40;s__
e.bin.193	81.31	2.197	13365	4086141	d__Bacteria;p__Eisenbacteria;c__RBG-16-71-46;o__RBG-16-71-46;f__RBG-16-71-46;g__WS-3;s__
e.bin.196	85.06	4.04	10121	3332249	d__Bacteria;p__Gemmatimonadota;c__Gemmatimonadetes;o__Gemmatimonadales;f__GWC2-71-9;g__AG25;s__
e.bin.197	83.16	4.456	9029	4431111	d__Bacteria;p__Acidobacteriota;c__Acidobacteriae;o__Bryobacterales;f__Bryobacteraceae;g__Palsa-89;s__
e.bin.199	75.99	1.696	9175	1927088	d__Bacteria;p__Proteobacteria;c__Alphaproteobacteria;o__Sphingomonadales;f__Sphingomonadaceae;g__Sphingomicrobium;s__
e.bin.203	71.1	2.287	5403	2885729	d__Bacteria;p__Proteobacteria;c__Gammaproteobacteria;o__Xanthomonadales;f__Rhodanobacteraceae;g__;s__
e.bin.204	72.07	3.743	3856	2269514	d__Bacteria;p__Nitrospirota;c__Nitrospiria;o__Nitrospirales;f__Nitrospiraceae;g__Nitrospira_C;s__
e.bin.207	86.75	2.735	22967	4269414	d__Bacteria;p__Acidobacteriota;c__Acidobacteriae;o__UBA7541;f__UBA7541;g__Palsa-147;s__
e.bin.21	78.4	1.203	8271	3368301	d__Bacteria;p__Planctomycetota;c__Phycisphaerae;o__Phycisphaerales;f__SM1A02;g__;s__
e.bin.211	73.32	4.871	7937	3840794	d__Bacteria;p__Acidobacteriota;c__Vicinamibacteria;o__Vicinamibacterales;f__UBA2999;g__2-02-FULL-65-29;s__
e.bin.212	78.15	1.746	5139	3401470	d__Bacteria;p__Proteobacteria;c__Alphaproteobacteria;o__Dongiales;f__Dongiaceae;g__;s__
e.bin.213	70.18	4.587	9628	2697756	d__Bacteria;p__Chloroflexota;c__Ellin6529;o__CSP1-4;f__CSP1-4;g__Palsa-1033;s__
e.bin.216	87.82	4.487	29748	8683194	d__Bacteria;p__Acidobacteriota;c__Blastocatellia;o__UBA7656;f__UBA7656;g__UBA7656;s__
e.bin.217	73.11	4.059	4572	5252987	d__Bacteria;p__Acidobacteriota;c__Vicinamibacteria;o__Fen-336;f__Fen-336;g__;s__
e.bin.218	72.27	1.98	17367	1581032	d__Bacteria;p__Patescibacteria;c__Microgenomatia;o__Levybacterales;f__UBA12049;g__JACDET01;s__
e.bin.219	75.83	2.278	5019	2307956	d__Bacteria;p__Actinobacteriota;c__Thermoleophilia;o__Gaiellales;f__Gaiellaceae;g__JACCRW01;s__
e.bin.22	71.82	0.854	5329	3247887	d__Bacteria;p__Actinobacteriota;c__Acidimicrobiia;o__Acidimicrobiales;f__JACDEA01;g__JACCXE01;s__
e.bin.227	85.01	2.864	4730	5750956	d__Bacteria;p__Bacteroidota;c__Bacteroidia;o__Cytophagales;f__Cyclobacteriaceae;g__Chryseolinea;s__Chryseolinea serpens
e.bin.23	86.28	4.32	8413	5677313	d__Bacteria;p__Acidobacteriota;c__Blastocatellia;o__UBA7656;f__UBA7656;g__;s__
e.bin.232	78.81	2.75	8571	2948396	d__Bacteria;p__Bacteroidota;c__Ignavibacteria;o__SJA-28;f__OLB5;g__;s__
e.bin.235	83.09	0	18615	2420156	d__Bacteria;p__Actinobacteriota;c__UBA4738;o__UBA4738;f__HRBIN12;g__;s__
e.bin.237	89.44	3.639	20294	5441912	d__Bacteria;p__Proteobacteria;c__Alphaproteobacteria;o__Rhizobiales;f__Xanthobacteraceae;g__BOG-931;s__
e.bin.238	72.87	1.724	6733	3692782	d__Bacteria;p__Bacteroidota;c__Bacteroidia;o__Chitinophagales;f__Chitinophagaceae;g__UTBCD1;s__
e.bin.242	77.96	1.342	11187	2910506	d__Bacteria;p__Proteobacteria;c__Alphaproteobacteria;o__Sphingomonadales;f__Sphingomonadaceae;g__Novosphingobium;s__
e.bin.246	81.68	0.908	9355	4422719	d__Bacteria;p__Acidobacteriota;c__Blastocatellia;o__Pyrinomonadales;f__Pyrinomonadaceae;g__UBA11740;s__
e.bin.247	77.47	3.897	10613	5589696	d__Bacteria;p__Methylomirabilota;c__Methylomirabilia;o__Rokubacteriales;f__;g__;s__
e.bin.249	73.86	3.706	13444	2800781	d__Bacteria;p__Proteobacteria;c__Alphaproteobacteria;o__Rhizobiales;f__Xanthobacteraceae;g__Pseudolabrys;s__
e.bin.252	84.62	4.729	7961	3188505	d__Bacteria;p__Verrucomicrobiota;c__Verrucomicrobiae;o__Pedosphaerales;f__UBA11358;g__;s__
e.bin.256	80.29	2.803	7227	3033724	d__Bacteria;p__Nitrospirota;c__Nitrospiria;o__Nitrospirales;f__Nitrospiraceae;g__Nitrospira_F;s__
e.bin.259	70.86	3.96	15014	957668	d__Bacteria;p__Patescibacteria;c__UBA1384;o__CAILIB01;f__CAILIB01;g__;s__
e.bin.262	89.73	1.923	108866	4742441	d__Bacteria;p__Acidobacteriota;c__Blastocatellia;o__Pyrinomonadales;f__Pyrinomonadaceae;g__UBA11740;s__
e.bin.267	84.29	3.351	4762	4584032	d__Bacteria;p__Proteobacteria;c__Gammaproteobacteria;o__Steroidobacterales;f__Steroidobacteraceae;g__PALSA-1196;s__
e.bin.268	70.84	4.564	7905	5903278	d__Bacteria;p__Proteobacteria;c__Alphaproteobacteria;o__Rhizobiales;f__Xanthobacteraceae;g__PALSA-894;s__
e.bin.271	84.46	1.521	30722	1824012	d__Bacteria;p__Proteobacteria;c__Alphaproteobacteria;o__Micropepsales;f__Micropepsaceae;g__;s__
e.bin.272	79.4	4.395	5070	3251221	d__Bacteria;p__Gemmatimonadota;c__Gemmatimonadetes;o__Gemmatimonadales;f__Gemmatimonadaceae;g__;s__
e.bin.276	75.89	1.379	20786	4504180	d__Bacteria;p__Proteobacteria;c__Gammaproteobacteria;o__Burkholderiales;f__SG8-41;g__;s__
e.bin.277	83.31	2.631	8429	6644508	d__Bacteria;p__Actinobacteriota;c__Actinomycetia;o__Mycobacteriales;f__Micromonosporaceae;g__Actinoplanes;s__
e.bin.278	75.89	1.709	14129	5522470	d__Bacteria;p__Acidobacteriota;c__Acidobacteriae;o__Acidobacteriales;f__Koribacteraceae;g__;s__
e.bin.280	74.72	4.329	13780	1932925	d__Bacteria;p__Gemmatimonadota;c__Gemmatimonadetes;o__Gemmatimonadales;f__GWC2-71-9;g__;s__
e.bin.284	80.45	0.313	296116	2015395	d__Bacteria;p__Patescibacteria;c__Paceibacteria;o__UBA9983_A;f__UBA2163;g__C7867-001;s__
e.bin.287	72.98	1.724	20028	4891732	d__Bacteria;p__Proteobacteria;c__Alphaproteobacteria;o__Rhizobiales;f__Xanthobacteraceae;g__Z2-YC6860;s__
e.bin.29	87.6	3.917	8851	4201568	d__Bacteria;p__Acidobacteriota;c__Thermoanaerobaculia;o__Gp7-AA8;f__Gp7-AA8;g__Gp7-AA10;s__
e.bin.291	89.74	3.525	12244	5855835	d__Bacteria;p__Methylomirabilota;c__Methylomirabilia;o__Rokubacteriales;f__;g__;s__
e.bin.292	80.27	4.2	6997	2049844	d__Bacteria;p__Proteobacteria;c__Gammaproteobacteria;o__SLND01;f__;g__;s__
e.bin.293	82.99	4.395	10195	2940415	d__Bacteria;p__Gemmatimonadota;c__Gemmatimonadetes;o__Gemmatimonadales;f__Gemmatimonadaceae;g__UBA4720;s__
e.bin.294	83.68	2.747	10553	3875926	d__Bacteria;p__Gemmatimonadota;c__Gemmatimonadetes;o__Gemmatimonadales;f__GWC2-71-9;g__JACDDX01;s__
e.bin.298	88.34	4.022	16435	3707573	d__Bacteria;p__Actinobacteriota;c__Thermoleophilia;o__Gaiellales;f__;g__;s__
e.bin.299	88.71	3.918	22290	6640456	d__Bacteria;p__Acidobacteriota;c__Thermoanaerobaculia;o__Gp7-AA8;f__Gp7-AA8;g__;s__
e.bin.302	86.03	2.476	10616	6340029	d__Bacteria;p__Proteobacteria;c__Gammaproteobacteria;o__Burkholderiales;f__Burkholderiaceae;g__Rhizobacter;s__Rhizobacter sp000799605
e.bin.304	78.86	4.2	14283	3237160	d__Bacteria;p__Proteobacteria;c__Gammaproteobacteria;o__Steroidobacterales;f__Steroidobacteraceae;g__;s__
e.bin.305	81.44	1.853	10068	3145072	d__Bacteria;p__Proteobacteria;c__Gammaproteobacteria;o__Burkholderiales;f__UKL13-2;g__GR16-43;s__
e.bin.306	76.37	1.198	8155	2590543	d__Bacteria;p__Gemmatimonadota;c__Gemmatimonadetes;o__Gemmatimonadales;f__GWC2-71-9;g__;s__
e.bin.307	75.69	2.037	6822	2309176	d__Bacteria;p__Dormibacterota;c__Dormibacteria;o__Dormibacterales;f__Dormibacteraceae;g__Palsa-872;s__
e.bin.308	81.37	3.109	8463	2541056	d__Bacteria;p__Verrucomicrobiota;c__Verrucomicrobiae;o__Chthoniobacterales;f__UBA10450;g__Palsa-1392;s__
e.bin.311	86.01	2.421	7280	4481790	d__Bacteria;p__Acidobacteriota;c__Blastocatellia;o__Pyrinomonadales;f__Pyrinomonadaceae;g__PSRF01;s__
e.bin.312	79.46	1.994	26243	3310166	d__Bacteria;p__Acidobacteriota;c__Vicinamibacteria;o__Vicinamibacterales;f__SCN-69-37;g__;s__
e.bin.315	85.25	2.564	41023	5486843	d__Bacteria;p__Acidobacteriota;c__Thermoanaerobaculia;o__Gp7-AA8;f__Gp7-AA8;g__;s__
e.bin.316	77.75	0	47352	6317263	d__Bacteria;p__Acidobacteriota;c__Vicinamibacteria;o__Vicinamibacterales;f__2-12-FULL-66-21;g__;s__
e.bin.318	85.98	2.169	10237	2400062	d__Bacteria;p__Verrucomicrobiota;c__Verrucomicrobiae;o__Chthoniobacterales;f__UBA10450;g__Palsa-1382;s__
e.bin.319	73.8	3.333	8467	4557157	d__Bacteria;p__Bacteroidota;c__Bacteroidia;o__Sphingobacteriales;f__Sphingobacteriaceae;g__Mucilaginibacter;s__
e.bin.32	79.39	4.421	13670	3140430	d__Bacteria;p__Verrucomicrobiota;c__Verrucomicrobiae;o__Palsa-1439;f__Palsa-1439;g__Palsa-1439;s__
e.bin.322	80.4	1.173	7992	3053802	d__Bacteria;p__Proteobacteria;c__Alphaproteobacteria;o__Micropepsales;f__Micropepsaceae;g__CAIYRG01;s__
e.bin.323	81.07	2.728	6599	4339828	d__Bacteria;p__Bacteroidota;c__Bacteroidia;o__Cytophagales;f__Cyclobacteriaceae;g__ELB16-189;s__
e.bin.325	88.01	4.795	9385	3887867	d__Bacteria;p__Actinobacteriota;c__Acidimicrobiia;o__Acidimicrobiales;f__Ilumatobacteraceae;g__;s__
e.bin.327	83.23	4.395	6627	3061647	d__Bacteria;p__Gemmatimonadota;c__Gemmatimonadetes;o__Gemmatimonadales;f__GWC2-71-9;g__Palsa-1233;s__
e.bin.328	85.53	2.564	15110	4464390	d__Bacteria;p__Acidobacteriota;c__Acidobacteriae;o__Acidobacteriales;f__Koribacteraceae;g__;s__
e.bin.33	71.38	2.297	6349	2681603	d__Bacteria;p__Gemmatimonadota;c__Gemmatimonadetes;o__Gemmatimonadales;f__Gemmatimonadaceae;g__UBA4720;s__
e.bin.330	83.61	3.313	8754	6068222	d__Bacteria;p__Proteobacteria;c__Gammaproteobacteria;o__Burkholderiales;f__Burkholderiaceae;g__Duganella;s__
e.bin.331	71.31	0	7092	3042909	d__Bacteria;p__Proteobacteria;c__Gammaproteobacteria;o__Nevskiales;f__Nevskiaceae;g__;s__
e.bin.332	75.09	1.748	4862	2697135	d__Bacteria;p__Proteobacteria;c__Gammaproteobacteria;o__Pseudomonadales;f__;g__;s__
e.bin.333	72.1	1.709	10669	4688311	d__Bacteria;p__Acidobacteriota;c__Acidobacteriae;o__Acidobacteriales;f__Koribacteraceae;g__;s__
e.bin.334	85.03	0.985	7180	3748505	d__Bacteria;p__Bacteroidota;c__Bacteroidia;o__Chitinophagales;f__Chitinophagaceae;g__Flavisolibacter;s__
e.bin.35	71.01	3.418	9898	4152749	d__Bacteria;p__Acidobacteriota;c__Acidobacteriae;o__Acidobacteriales;f__Koribacteraceae;g__QIAJ01;s__
e.bin.36	71.46	3.996	5237	2211358	d__Bacteria;p__Gemmatimonadota;c__Gemmatimonadetes;o__Gemmatimonadales;f__GWC2-71-9;g__;s__
e.bin.37	76.07	4.945	5247	4054952	d__Bacteria;p__Gemmatimonadota;c__Gemmatimonadetes;o__Gemmatimonadales;f__GWC2-71-9;g__;s__
e.bin.38	78.39	2.659	5440	4845662	d__Bacteria;p__Actinobacteriota;c__Actinomycetia;o__Mycobacteriales;f__Pseudonocardiaceae;g__Pseudonocardia;s__
e.bin.39	89.74	3.589	50395	6373054	d__Bacteria;p__Acidobacteriota;c__Vicinamibacteria;o__Fen-336;f__Fen-336;g__AA32;s__
e.bin.40	83.22	0.94	20411	2489131	d__Bacteria;p__Verrucomicrobiota;c__Verrucomicrobiae;o__Chthoniobacterales;f__UBA10450;g__;s__
e.bin.41	78.86	3.045	7111	3203728	d__Bacteria;p__Proteobacteria;c__Gammaproteobacteria;o__Burkholderiales;f__Casimicrobiaceae;g__VBCG01;s__
e.bin.42	81.63	1.648	6812	2579601	d__Bacteria;p__Gemmatimonadota;c__Gemmatimonadetes;o__Gemmatimonadales;f__Gemmatimonadaceae;g__UBA4720;s__
e.bin.48	74.24	2.967	6866	3149935	d__Bacteria;p__Proteobacteria;c__Gammaproteobacteria;o__SZUA-146;f__;g__;s__
e.bin.50	80.17	4.273	14141	6900775	d__Bacteria;p__Acidobacteriota;c__Vicinamibacteria;o__Vicinamibacterales;f__UBA2999;g__Gp6-AA45;s__
e.bin.54	82.76	3.086	5725	6330151	d__Bacteria;p__Armatimonadota;c__Chthonomonadetes;o__Chthonomonadales;f__Chthonomonadaceae;g__;s__
e.bin.55	71.07	4.09	6017	1657651	d__Bacteria;p__Chloroflexota;c__Anaerolineae;o__Anaerolineales;f__UBA11579;g__;s__
e.bin.58	87.49	1.497	9225	2356064	d__Bacteria;p__Proteobacteria;c__Alphaproteobacteria;o__Sphingomonadales;f__Sphingomonadaceae;g__Sphingomicrobium;s__
e.bin.59	82.79	4.597	9021	7732956	d__Bacteria;p__Planctomycetota;c__Planctomycetes;o__Planctomycetales;f__UBA10511;g__SIAF01;s__
e.bin.6	76.14	4.395	9378	3406626	d__Bacteria;p__Gemmatimonadota;c__Gemmatimonadetes;o__Gemmatimonadales;f__Gemmatimonadaceae;g__AG11;s__
e.bin.61	84.26	0	37080	1076589	d__Bacteria;p__Dependentiae;c__Babeliae;o__Babeliales;f__Vermiphilaceae;g__;s__
e.bin.62	83.53	0.617	11021	2894569	d__Bacteria;p__Actinobacteriota;c__Actinomycetia;o__Mycobacteriales;f__;g__;s__
e.bin.67	72.66	4.7	9941	4395522	d__Bacteria;p__Acidobacteriota;c__Acidobacteriae;o__Acidobacteriales;f__Koribacteraceae;g__;s__
e.bin.69	73.94	4.017	5183	4492144	d__Bacteria;p__Acidobacteriota;c__Acidobacteriae;o__UBA7541;f__UBA7541;g__UBA7541;s__
e.bin.73	84.92	1.915	9150	3807403	d__Bacteria;p__Bacteroidota;c__Bacteroidia;o__Chitinophagales;f__Chitinophagaceae;g__VBAT01;s__
e.bin.74	85.22	1.582	42264	3603549	d__Bacteria;p__Proteobacteria;c__Alphaproteobacteria;o__Rhizobiales;f__Xanthobacteraceae;g__Pseudolabrys;s__
e.bin.75	76.58	3.76	8264	3010645	d__Bacteria;p__Proteobacteria;c__Gammaproteobacteria;o__Burkholderiales;f__SG8-39;g__SCGC-AG-212-J23;s__
e.bin.8	83.81	3.846	14182	3465150	d__Bacteria;p__Gemmatimonadota;c__Gemmatimonadetes;o__Gemmatimonadales;f__GWC2-71-9;g__DSTP01;s__
e.bin.81	79.31	1.794	7345	3325819	d__Bacteria;p__Proteobacteria;c__Alphaproteobacteria;o__Sphingomonadales;f__Sphingomonadaceae;g__Novosphingobium;s__
e.bin.82	79.61	4.19	7131	4601832	d__Bacteria;p__Proteobacteria;c__Gammaproteobacteria;o__Burkholderiales;f__SHXO01;g__;s__
e.bin.86	79.67	3.268	5478	5518940	d__Bacteria;p__Proteobacteria;c__Gammaproteobacteria;o__Burkholderiales;f__Burkholderiaceae;g__Duganella;s__Duganella sp013375995
e.bin.88	81.45	2.97	4973	3375060	d__Bacteria;p__Chloroflexota;c__Dehalococcoidia;o__UBA2991;f__UBA2991;g__PNKC01;s__
e.bin.89	81.69	3.589	5462	5599092	d__Bacteria;p__Acidobacteriota;c__Vicinamibacteria;o__Fen-336;f__Fen-336;g__;s__
e.bin.93	81.17	2.991	17172	4955415	d__Bacteria;p__Acidobacteriota;c__Acidobacteriae;o__Acidobacteriales;f__Koribacteraceae;g__;s__
e.bin.95	75.25	3.203	10476	3108963	d__Bacteria;p__Proteobacteria;c__Alphaproteobacteria;o__Caulobacterales;f__Hyphomonadaceae;g__;s__
e.bin.97	70.75	4.273	8059	3072553	d__Bacteria;p__Acidobacteriota;c__Acidobacteriae;o__UBA7541;f__UBA7541;g__Palsa-147;s__
e.bin.99	78.89	1.843	13306	2258237	d__Bacteria;p__Proteobacteria;c__Alphaproteobacteria;o__Sphingomonadales;f__Sphingomonadaceae;g__Sphingobium;s__
e.bin.10	95.13	9.166	45789	7293339	d__Bacteria;p__Verrucomicrobiota;c__Verrucomicrobiae;o__Pedosphaerales;f__UBA8199;g__;s__
e.bin.109	96.2	6.93	28677	7828355	d__Bacteria;p__Chloroflexota;c__Ktedonobacteria;o__Ktedonobacterales;f__Ktedonobacteraceae;g__CF-113;s__
e.bin.13	93.33	5.128	88438	7077457	d__Bacteria;p__Gemmatimonadota;c__Gemmatimonadetes;o__Gemmatimonadales;f__Gemmatimonadaceae;g__AG2;s__
e.bin.130	96.58	5.346	14527	4071251	d__Bacteria;p__Acidobacteriota;c__Mor1;o__Mor1;f__;g__;s__
e.bin.160	92.14	6.891	11236	6247314	d__Bacteria;p__Verrucomicrobiota;c__Verrucomicrobiae;o__Pedosphaerales;f__UBA8199;g__PSRM01;s__
e.bin.163	90.23	6.402	12855	5309903	d__Bacteria;p__Proteobacteria;c__Gammaproteobacteria;o__Steroidobacterales;f__Steroidobacteraceae;g__;s__
e.bin.220	94.9	5.657	41809	3298711	d__Bacteria;p__Proteobacteria;c__Alphaproteobacteria;o__Sphingomonadales;f__Sphingomonadaceae;g__Sphingomicrobium;s__
e.bin.224	90.1	6.985	71223	2082584	d__Bacteria;p__Dependentiae;c__Babeliae;o__Babeliales;f__Vermiphilaceae;g__;s__
e.bin.228	90.2	6.089	19753	5064848	d__Bacteria;p__Proteobacteria;c__Alphaproteobacteria;o__Rhizobiales;f__Xanthobacteraceae;g__Pseudolabrys;s__
e.bin.229	90.91	5.128	29112	3867381	d__Bacteria;p__Acidobacteriota;c__Acidobacteriae;o__UBA7541;f__UBA7541;g__UBA7541;s__
e.bin.231	93.42	7.632	16460	7433576	d__Bacteria;p__Acidobacteriota;c__Acidobacteriae;o__Bryobacterales;f__Bryobacteraceae;g__;s__
e.bin.236	91.12	7.227	16048	3561081	d__Bacteria;p__Proteobacteria;c__Gammaproteobacteria;o__Xanthomonadales;f__Xanthomonadaceae;g__;s__
e.bin.24	97.52	7.263	43648	7703092	d__Bacteria;p__Planctomycetota;c__MHYJ01;o__MHYJ01;f__MHYJ01;g__;s__
e.bin.25	91.16	6.41	16821	7243981	d__Bacteria;p__Acidobacteriota;c__Blastocatellia;o__UBA7656;f__UBA7656;g__;s__
e.bin.255	95.04	5.132	42574	4722218	d__Bacteria;p__Proteobacteria;c__Gammaproteobacteria;o__Steroidobacterales;f__Steroidobacteraceae;g__;s__
e.bin.260	93.05	5.502	8426	6089579	d__Bacteria;p__Acidobacteriota;c__Blastocatellia;o__Pyrinomonadales;f__Pyrinomonadaceae;g__UBA11740;s__
e.bin.265	98.21	5.675	43434	7358406	d__Bacteria;p__Verrucomicrobiota;c__Verrucomicrobiae;o__Pedosphaerales;f__UBA8199;g__PSRM01;s__
e.bin.279	93.35	8.985	109340	8171358	d__Bacteria;p__Acidobacteriota;c__Vicinamibacteria;o__Vicinamibacterales;f__2-12-FULL-66-21;g__;s__
e.bin.282	95.59	5.397	53383	6634747	d__Bacteria;p__Proteobacteria;c__Gammaproteobacteria;o__Steroidobacterales;f__Steroidobacteraceae;g__PALSA-1196;s__
e.bin.321	90.62	7.321	14469	3622520	d__Bacteria;p__Acidobacteriota;c__Thermoanaerobaculia;o__UBA5066;f__Gp7-AA6;g__;s__
e.bin.56	98.29	5.175	90838	5618330	d__Bacteria;p__Acidobacteriota;c__Blastocatellia;o__Pyrinomonadales;f__Pyrinomonadaceae;g__JACVRN01;s__
e.bin.77	96.62	5.067	85531	7514842	d__Bacteria;p__Verrucomicrobiota;c__Verrucomicrobiae;o__Pedosphaerales;f__SIBH01;g__;s__
e.bin.79	97.81	9.121	48466	3217971	d__Bacteria;p__Verrucomicrobiota;c__Verrucomicrobiae;o__Chthoniobacterales;f__UBA10450;g__AV40;s__
e.bin.83	92.51	6.743	9448	9226809	d__Bacteria;p__Actinobacteriota;c__Actinomycetia;o__Streptosporangiales;f__Streptosporangiaceae;g__Palsa-504;s__
e.bin.84	95.72	5.982	41677	7690774	d__Bacteria;p__Acidobacteriota;c__Blastocatellia;o__UBA7656;f__UBA7656;g__;s__
e.bin.102	82.31	5.445	5198	5182974	d__Bacteria;p__Chloroflexota;c__Ktedonobacteria;o__Ktedonobacterales;f__;g__;s__
e.bin.107	73.1	8.119	4447	6845700	d__Bacteria;p__Acidobacteriota;c__Vicinamibacteria;o__Vicinamibacterales;f__;g__;s__
e.bin.118	81.95	9.464	10112	5461747	d__Bacteria;p__Proteobacteria;c__Gammaproteobacteria;o__Nevskiales;f__Nevskiaceae;g__Nevskia;s__
e.bin.128	74.68	7.672	4065	4743488	d__Bacteria;p__Myxococcota;c__Polyangia;o__Polyangiales;f__Polyangiaceae;g__;s__
e.bin.136	84.48	6.865	27780	6002429	d__Bacteria;p__Proteobacteria;c__Gammaproteobacteria;o__Steroidobacterales;f__Steroidobacteraceae;g__;s__
e.bin.137	85.64	5.46	12027	6094087	d__Bacteria;p__Acidobacteriota;c__Blastocatellia;o__Pyrinomonadales;f__Pyrinomonadaceae;g__UBA11740;s__
e.bin.140	73.78	5.555	5510	2580615	d__Bacteria;p__Acidobacteriota;c__Blastocatellia;o__Pyrinomonadales;f__Pyrinomonadaceae;g__OLB17;s__
e.bin.151	85.34	6.17	22625	6760665	d__Bacteria;p__Methylomirabilota;c__Methylomirabilia;o__Rokubacteriales;f__GWA2-73-35;g__AR5;s__
e.bin.155	79.58	7.559	5700	3459043	d__Bacteria;p__Planctomycetota;c__Phycisphaerae;o__Phycisphaerales;f__SM1A02;g__;s__
e.bin.157	81.91	5.516	15463	6539360	d__Bacteria;p__Acidobacteriota;c__Vicinamibacteria;o__Vicinamibacterales;f__2-12-FULL-66-21;g__;s__
e.bin.158	71.26	8.476	4353	4792033	d__Bacteria;p__Myxococcota;c__UBA796;o__UBA796;f__;g__;s__
e.bin.159	70.8	7.862	4559	2504623	d__Bacteria;p__Proteobacteria;c__Alphaproteobacteria;o__Rhizobiales;f__Hyphomicrobiaceae;g__;s__
e.bin.162	83.08	5.545	6812	6205538	d__Bacteria;p__Proteobacteria;c__Gammaproteobacteria;o__Steroidobacterales;f__Steroidobacteraceae;g__;s__
e.bin.170	80.75	5.269	5529	3983781	d__Bacteria;p__Proteobacteria;c__Gammaproteobacteria;o__Steroidobacterales;f__Steroidobacteraceae;g__Steroidobacter_A;s__
e.bin.173	88.64	7.08	12425	6173711	d__Bacteria;p__Proteobacteria;c__Gammaproteobacteria;o__Burkholderiales;f__Burkholderiaceae;g__Variovorax;s__
e.bin.181	74.13	5.172	25020	6167328	d__Bacteria;p__Acidobacteriota;c__Vicinamibacteria;o__Vicinamibacterales;f__2-12-FULL-66-21;g__2-12-FULL-66-21;s__
e.bin.186	81.67	6.034	21256	5439465	d__Bacteria;p__Proteobacteria;c__Alphaproteobacteria;o__Caulobacterales;f__Caulobacteraceae;g__Phenylobacterium;s__
e.bin.189	87.4	6.613	14101	2647488	d__Bacteria;p__Proteobacteria;c__Alphaproteobacteria;o__Rhizobiales;f__Xanthobacteraceae;g__Palsa-892;s__
e.bin.194	79	5.623	8115	4010124	d__Bacteria;p__Gemmatimonadota;c__Gemmatimonadetes;o__Gemmatimonadales;f__Gemmatimonadaceae;g__UBA4720;s__
e.bin.198	83	5.663	7920	2094814	d__Archaea;p__Thermoplasmatota;c__E2;o__UBA9212;f__;g__;s__
e.bin.20	79.32	8.241	13041	2114865	d__Bacteria;p__Eisenbacteria;c__RBG-16-71-46;o__SZUA-252;f__SZUA-252;g__WS-9;s__
e.bin.201	70.16	6.837	8190	6139536	d__Bacteria;p__Acidobacteriota;c__Blastocatellia;o__UBA7656;f__UBA7656;g__;s__
e.bin.202	85.58	5.664	24298	4315678	d__Bacteria;p__Proteobacteria;c__Gammaproteobacteria;o__UBA6522;f__UBA6522;g__FEN-1219;s__
e.bin.206	74.63	9.482	13794	7177536	d__Bacteria;p__Proteobacteria;c__Alphaproteobacteria;o__Rhizobiales;f__Xanthobacteraceae;g__;s__
e.bin.210	73.88	8.324	3999	4103718	d__Bacteria;p__Proteobacteria;c__Alphaproteobacteria;o__Rhizobiales;f__Beijerinckiaceae;g__Roseiarcus;s__
e.bin.222	74.7	5.148	10245	4891652	d__Bacteria;p__Proteobacteria;c__Gammaproteobacteria;o__Nevskiales;f__Nevskiaceae;g__Nevskia;s__
e.bin.223	89.89	6.676	14592	6336295	d__Bacteria;p__Planctomycetota;c__Planctomycetes;o__Pirellulales;f__Pirellulaceae;g__SXOA01;s__
e.bin.230	74.49	8.528	5369	1892032	d__Bacteria;p__Chloroflexota;c__Ellin6529;o__QHBO01;f__QHBO01;g__;s__
e.bin.241	73.9	6.878	5122	2354790	d__Bacteria;p__Proteobacteria;c__Alphaproteobacteria;o__Sphingomonadales;f__Sphingomonadaceae;g__Novosphingobium;s__
e.bin.244	72.23	8.652	6115	5797347	d__Bacteria;p__Actinobacteriota;c__Actinomycetia;o__Mycobacteriales;f__Frankiaceae;g__;s__
e.bin.263	83.38	6.41	8449	3821656	d__Bacteria;p__Actinobacteriota;c__Acidimicrobiia;o__Acidimicrobiales;f__;g__;s__
e.bin.264	74.98	6.29	12066	6991289	d__Bacteria;p__Myxococcota;c__Polyangia;o__Haliangiales;f__Haliangiaceae;g__WYBA01;s__
e.bin.269	84.94	8.256	10512	4570902	d__Bacteria;p__Desulfobacterota_B;c__Binatia;o__UBA9968;f__UBA9968;g__2-12-FULL-60-19;s__
e.bin.274	78.5	9.002	6408	5952580	d__Bacteria;p__Acidobacteriota;c__Vicinamibacteria;o__Fen-336;f__Fen-336;g__;s__
e.bin.275	70.17	5.418	4960	3725190	d__Bacteria;p__Bacteroidota;c__Bacteroidia;o__Chitinophagales;f__UBA10324;g__;s__
e.bin.281	87.2	6.116	10521	6871766	d__Bacteria;p__Proteobacteria;c__Gammaproteobacteria;o__Burkholderiales;f__SG8-41;g__;s__
e.bin.285	80.04	5.431	7006	3391747	d__Bacteria;p__Proteobacteria;c__Gammaproteobacteria;o__Xanthomonadales;f__Rhodanobacteraceae;g__;s__
e.bin.290	73.86	5.362	5253	3727325	d__Bacteria;p__Proteobacteria;c__Alphaproteobacteria;o__Caulobacterales;f__Caulobacteraceae;g__Phenylobacterium;s__
e.bin.30	76.88	8.119	7658	5928387	d__Bacteria;p__Acidobacteriota;c__Blastocatellia;o__UBA7656;f__UBA7656;g__UBA7656;s__
e.bin.300	71.72	6.034	22394	4463143	d__Bacteria;p__Proteobacteria;c__Gammaproteobacteria;o__Xanthomonadales;f__Rhodanobacteraceae;g__Dyella;s__
e.bin.301	78.05	6.233	10455	4039798	d__Bacteria;p__Verrucomicrobiota;c__Verrucomicrobiae;o__Chthoniobacterales;f__UBA10450;g__Palsa-1392;s__
e.bin.313	85.67	7.895	8515	3496160	d__Bacteria;p__Proteobacteria;c__Alphaproteobacteria;o__Micropepsales;f__Micropepsaceae;g__Rhizomicrobium;s__
e.bin.314	85.4	7.953	10395	2695900	d__Bacteria;p__Actinobacteriota;c__UBA4738;o__UBA4738;f__HRBIN12;g__;s__
e.bin.317	83.19	9.075	5138	4969002	d__Bacteria;p__Chloroflexota;c__Ktedonobacteria;o__Ktedonobacterales;f__;g__;s__
e.bin.320	72.22	7.645	7781	3919001	d__Bacteria;p__Chloroflexota;c__Dehalococcoidia;o__DSTF01;f__RBG-16-68-14;g__;s__
e.bin.324	77.07	9.488	4548	4923703	d__Bacteria;p__Proteobacteria;c__Gammaproteobacteria;o__UBA6522;f__UBA6522;g__;s__
e.bin.335	74.61	5.494	8766	5549831	d__Bacteria;p__Gemmatimonadota;c__Gemmatimonadetes;o__Gemmatimonadales;f__GWC2-71-9;g__;s__
e.bin.4	81.37	6.102	10097	4174605	d__Bacteria;p__Proteobacteria;c__Gammaproteobacteria;o__Burkholderiales;f__SG8-39;g__SCGC-AG-212-J23;s__
e.bin.47	71.66	6.034	9598	7958920	d__Bacteria;p__Gemmatimonadota;c__Gemmatimonadetes;o__Gemmatimonadales;f__Gemmatimonadaceae;g__;s__
e.bin.51	76.7	5.726	5136	3684776	d__Bacteria;p__Acidobacteriota;c__Mor1;o__Mor1;f__;g__;s__
e.bin.60	70.84	5.172	11603	4507055	d__Bacteria;p__Proteobacteria;c__Gammaproteobacteria;o__Burkholderiales;f__Casimicrobiaceae;g__CAIWHR01;s__
e.bin.66	86.11	5.623	7183	3100103	d__Bacteria;p__Gemmatimonadota;c__Gemmatimonadetes;o__Gemmatimonadales;f__GWC2-71-9;g__;s__
e.bin.68	86.97	5.982	57423	7003492	d__Bacteria;p__Acidobacteriota;c__Vicinamibacteria;o__Vicinamibacterales;f__UBA2999;g__Gp6-AA45;s__
e.bin.70	82.96	9.401	5346	4921051	d__Bacteria;p__Acidobacteriota;c__Thermoanaerobaculia;o__Gp7-AA8;f__Gp7-AA8;g__;s__
e.bin.71	70.55	7.548	4736	3731454	d__Bacteria;p__Proteobacteria;c__Alphaproteobacteria;o__Caulobacterales;f__Caulobacteraceae;g__;s__
e.bin.76	77.46	7.906	5582	5735954	d__Bacteria;p__Proteobacteria;c__Gammaproteobacteria;o__Burkholderiales;f__Burkholderiaceae;g__CAIMXF01;s__
e.bin.78	78.7	7.58	9733	6358282	d__Bacteria;p__Desulfobacterota_B;c__Binatia;o__UTPRO1;f__UTPRO1;g__UTPRO1;s__
e.bin.80	75.17	6.552	7957	2507617	d__Bacteria;p__Acidobacteriota;c__Acidobacteriae;o__UBA7541;f__UBA7541;g__;s__
e.bin.85	74.48	8.965	21188	3349649	d__Bacteria;p__Proteobacteria;c__Alphaproteobacteria;o__Rhizobiales;f__Xanthobacteraceae;g__Pseudolabrys;s__
e.bin.87	73.71	6.981	7877	3842035	d__Bacteria;p__Desulfobacterota_B;c__Binatia;o__UBA9968;f__UBA9968;g__DP-20;s__
e.bin.9	78.19	8.91	5538	3305296	d__Bacteria;p__Proteobacteria;c__Gammaproteobacteria;o__Burkholderiales;f__Burkholderiaceae;g__Ramlibacter;s__
e.bin.90	84.62	6.612	8755	6799676	d__Bacteria;p__Myxococcota;c__Polyangia;o__Palsa-1104;f__Palsa-1104;g__;s__
e.bin.91	74.24	5.333	5526	1838121	d__Archaea;p__Thermoplasmatota;c__SW-10-69-26;o__;f__;g__;s__
e.bin.94	78.99	5.494	8782	5745148	d__Bacteria;p__Gemmatimonadota;c__Gemmatimonadetes;o__Gemmatimonadales;f__GWC2-71-9;g__JABFSM01;s__

## Sheet: f-B.napus_M26
bin	completeness	contamination	N50	size	classification
f.bin.107	95.72	2.564	107879	7057650	d__Bacteria;p__Acidobacteriota;c__Acidobacteriae;o__Acidobacteriales;f__Gp1-AA117;g__Gp1-AA17;s__
f.bin.111	95.05	3.944	79982	2778042	d__Bacteria;p__Proteobacteria;c__Alphaproteobacteria;o__Rhizobiales;f__Xanthobacteraceae;g__Bradyrhizobium;s__
f.bin.115	94.87	2.803	40665	6399400	d__Bacteria;p__Verrucomicrobiota;c__Verrucomicrobiae;o__Pedosphaerales;f__UBA11358;g__;s__
f.bin.117	95.32	1.231	19283	4472479	d__Archaea;p__Thermoplasmatota;c__SW-10-69-26;o__;f__;g__;s__
f.bin.118	91.81	4.09	33872	3454293	d__Bacteria;p__Proteobacteria;c__Alphaproteobacteria;o__Rhizobiales;f__Xanthobacteraceae;g__Pseudolabrys;s__
f.bin.119	94.35	1.008	12979	2531893	d__Bacteria;p__Proteobacteria;c__Alphaproteobacteria;o__Sphingomonadales;f__Sphingomonadaceae;g__Novosphingobium;s__
f.bin.125	94.32	2.664	34046	10722579	d__Bacteria;p__Acidobacteriota;c__Acidobacteriae;o__Acidobacteriales;f__Koribacteraceae;g__Gp1-AA145;s__
f.bin.133	90.94	4.488	10079	8818009	d__Bacteria;p__Acidobacteriota;c__Thermoanaerobaculia;o__Gp7-AA8;f__Gp7-AA8;g__;s__
f.bin.136	97.85	0.158	129705	6026703	d__Bacteria;p__Proteobacteria;c__Alphaproteobacteria;o__Dongiales;f__Dongiaceae;g__Hypericibacter;s__Hypericibacter terrae
f.bin.141	95.6	1.098	159765	2902332	d__Bacteria;p__Acidobacteriota;c__Blastocatellia;o__Pyrinomonadales;f__Pyrinomonadaceae;g__;s__
f.bin.142	95.85	2.563	30754	2746526	d__Bacteria;p__Acidobacteriota;c__Vicinamibacteria;o__Vicinamibacterales;f__2-12-FULL-66-21;g__;s__
f.bin.147	91.08	3.076	16068	5553382	d__Bacteria;p__Proteobacteria;c__Alphaproteobacteria;o__Rhizobiales;f__Xanthobacteraceae;g__Pseudolabrys;s__
f.bin.149	97.68	1.472	26180	3524493	d__Bacteria;p__Verrucomicrobiota;c__Verrucomicrobiae;o__Chthoniobacterales;f__UBA10450;g__Palsa-1382;s__
f.bin.151	95.92	2.991	40844	4745810	d__Bacteria;p__Eisenbacteria;c__RBG-16-71-46;o__RBG-16-71-46;f__RBG-16-71-46;g__WS-3;s__
f.bin.158	95.63	3.371	20141	4698443	d__Bacteria;p__Actinobacteriota;c__Thermoleophilia;o__Gaiellales;f__Gaiellaceae;g__Palsa-739;s__
f.bin.16	97.72	1.136	410700	4025254	d__Bacteria;p__Proteobacteria;c__Gammaproteobacteria;o__Burkholderiales;f__SG8-40;g__;s__
f.bin.160	93.56	2.325	142664	2591425	d__Bacteria;p__Acidobacteriota;c__Blastocatellia;o__Pyrinomonadales;f__Pyrinomonadaceae;g__;s__
f.bin.163	100	1.098	533726	3062508	d__Bacteria;p__Proteobacteria;c__Gammaproteobacteria;o__Steroidobacterales;f__Steroidobacteraceae;g__;s__
f.bin.18	95.23	1.195	56093	3373857	d__Bacteria;p__Proteobacteria;c__Gammaproteobacteria;o__Burkholderiales;f__Burkholderiaceae;g__Mitsuaria;s__
f.bin.180	92.11	1.958	32387	4055256	d__Bacteria;p__Actinobacteriota;c__Thermoleophilia;o__Gaiellales;f__Gaiellaceae;g__Palsa-739;s__
f.bin.182	96.18	0.543	48972	2123550	d__Bacteria;p__Bacteroidota;c__Bacteroidia;o__Chitinophagales;f__Chitinophagaceae;g__Puia;s__
f.bin.186	97.43	3.418	64863	7408251	d__Bacteria;p__Nitrospirota;c__Nitrospiria;o__Nitrospirales;f__Nitrospiraceae;g__Palsa-1315;s__
f.bin.197	99.14	1.709	145772	5526382	d__Bacteria;p__Myxococcota;c__UBA727;o__UBA727;f__GCA-2721815;g__;s__
f.bin.200	93.38	2.427	44873	3483537	d__Bacteria;p__Patescibacteria;c__Saccharimonadia;o__UBA4664;f__UBA4664;g__;s__
f.bin.203	90.1	3.296	9203	4706030	d__Bacteria;p__Gemmatimonadota;c__Gemmatimonadetes;o__Gemmatimonadales;f__Gemmatimonadaceae;g__AG2;s__
f.bin.211	90.05	2.747	14428	3773654	d__Bacteria;p__Acidobacteriota;c__Blastocatellia;o__UBA7656;f__UBA7656;g__;s__
f.bin.212	97.46	4.322	249648	5255320	d__Bacteria;p__Actinobacteriota;c__Acidimicrobiia;o__Acidimicrobiales;f__JACDCH01;g__;s__
f.bin.215	92.64	4.761	41182	6896315	d__Bacteria;p__Gemmatimonadota;c__Gemmatimonadetes;o__Gemmatimonadales;f__GWC2-71-9;g__Palsa-1233;s__
f.bin.218	98.85	1.724	144943	6279471	d__Bacteria;p__Planctomycetota;c__Phycisphaerae;o__UBA1845;f__UTPLA1;g__PLA3;s__
f.bin.22	93.9	3.326	22468	2383092	d__Bacteria;p__Acidobacteriota;c__Acidobacteriae;o__Bryobacterales;f__Bryobacteraceae;g__Solibacter;s__
f.bin.223	95.07	3.341	23024	5380889	d__Bacteria;p__Planctomycetota;c__MHYJ01;o__MHYJ01;f__MHYJ01;g__;s__
f.bin.227	94.44	2.564	170109	6034247	d__Bacteria;p__Acidobacteriota;c__Vicinamibacteria;o__Vicinamibacterales;f__UBA2999;g__Gp6-AA40;s__
f.bin.23	90.59	3.844	66111	3957585	d__Bacteria;p__Actinobacteriota;c__Actinomycetia;o__Propionibacteriales;f__Nocardioidaceae;g__Aeromicrobium;s__
f.bin.230	92.85	4.284	11243	3437300	d__Bacteria;p__Proteobacteria;c__Alphaproteobacteria;o__Rhizobiales;f__Xanthobacteraceae;g__Bradyrhizobium;s__
f.bin.234	97.72	1.136	84764	4648483	d__Bacteria;p__Planctomycetota;c__UBA1135;o__UBA1135;f__GCA-002686595;g__;s__
f.bin.238	91.54	3.418	14536	4485011	d__Bacteria;p__Proteobacteria;c__Gammaproteobacteria;o__Burkholderiales;f__UKL13-2;g__GR16-43;s__
f.bin.245	90.59	4.77	23448	3852137	d__Bacteria;p__Acidobacteriota;c__Vicinamibacteria;o__Vicinamibacterales;f__UBA2999;g__Gp6-AA45;s__
f.bin.25	96.92	1.754	36305	6574321	d__Bacteria;p__Proteobacteria;c__Alphaproteobacteria;o__Rhizobiales;f__Aestuariivirgaceae;g__CABJBCQ01;s__
f.bin.250	97.31	1.149	48384	8905366	d__Bacteria;p__Actinobacteriota;c__Actinomycetia;o__Streptosporangiales;f__Streptosporangiaceae;g__Palsa-504;s__
f.bin.251	96.31	0.76	33526	5304908	d__Bacteria;p__Acidobacteriota;c__Acidobacteriae;o__Bryobacterales;f__Bryobacteraceae;g__Solibacter;s__
f.bin.252	91.63	3.304	22530	2494311	d__Bacteria;p__Patescibacteria;c__Paceibacteria;o__UBA9983_A;f__UBA2163;g__C7867-001;s__
f.bin.257	97.14	0.095	177311	3897343	d__Bacteria;p__Proteobacteria;c__Alphaproteobacteria;o__Rhizobiales;f__Xanthobacteraceae;g__PALSA-894;s__
f.bin.260	90.46	4.055	11447	6114474	d__Bacteria;p__Acidobacteriota;c__Thermoanaerobaculia;o__Gp7-AA8;f__Gp7-AA8;g__;s__
f.bin.261	100	2.027	287779	3205187	d__Bacteria;p__Gemmatimonadota;c__Gemmatimonadetes;o__Gemmatimonadales;f__GWC2-71-9;g__20CM-2-65-7;s__
f.bin.263	90.51	4.7	20002	5689754	d__Bacteria;p__Proteobacteria;c__Alphaproteobacteria;o__Caulobacterales;f__Hyphomonadaceae;g__VFBF01;s__
f.bin.264	92.43	0.663	9364	2476943	d__Bacteria;p__Bacteroidota;c__Bacteroidia;o__Cytophagales;f__Cyclobacteriaceae;g__Chryseolinea;s__Chryseolinea serpens
f.bin.266	99.06	0.738	121489	5742047	d__Bacteria;p__Proteobacteria;c__Gammaproteobacteria;o__DSM-16500;f__DSM-16500;g__JABDBV01;s__
f.bin.267	97.22	0	76154	3521037	d__Bacteria;p__Eisenbacteria;c__RBG-16-71-46;o__SZUA-252;f__SZUA-252;g__WS-9;s__
f.bin.269	98.9	1.709	210381	6493633	d__Bacteria;p__Proteobacteria;c__Alphaproteobacteria;o__Caulobacterales;f__Caulobacteraceae;g__NCED01;s__
f.bin.27	90.68	2.747	18615	3168700	d__Bacteria;p__Proteobacteria;c__Gammaproteobacteria;o__Steroidobacterales;f__Steroidobacteraceae;g__;s__
f.bin.270	94.5	4.395	22706	4758613	d__Bacteria;p__Acidobacteriota;c__Vicinamibacteria;o__Vicinamibacterales;f__SCN-69-37;g__;s__
f.bin.272	95.29	0.854	25278	4303051	d__Bacteria;p__Planctomycetota;c__Phycisphaerae;o__Phycisphaerales;f__SM1A02;g__;s__
f.bin.285	93.75	4.244	22905	4745528	d__Bacteria;p__Proteobacteria;c__Gammaproteobacteria;o__Steroidobacterales;f__Steroidobacteraceae;g__;s__
f.bin.295	95.72	0.854	248145	4039601	d__Bacteria;p__Proteobacteria;c__Gammaproteobacteria;o__Burkholderiales;f__Burkholderiaceae;g__Variovorax;s__
f.bin.298	92.38	0.452	28102	3719411	d__Bacteria;p__Patescibacteria;c__Paceibacteria;o__UBA9983_A;f__UBA6065;g__UBA6065;s__
f.bin.299	92.8	1.893	29421	6374356	d__Bacteria;p__Proteobacteria;c__Alphaproteobacteria;o__Caulobacterales;f__Hyphomonadaceae;g__;s__
f.bin.3	90.58	1.962	11482	2684361	d__Bacteria;p__Proteobacteria;c__Gammaproteobacteria;o__Steroidobacterales;f__Steroidobacteraceae;g__;s__
f.bin.303	92.57	3.386	16320	3703830	d__Bacteria;p__Proteobacteria;c__Alphaproteobacteria;o__Micavibrionales;f__Micavibrionaceae;g__;s__
f.bin.308	91.28	0.917	168646	2782782	d__Bacteria;p__Actinobacteriota;c__Acidimicrobiia;o__Acidimicrobiales;f__AC-14;g__CADDZP01;s__
f.bin.313	97.6	1.098	10948	2445775	d__Bacteria;p__Proteobacteria;c__Alphaproteobacteria;o__Rhizobiales;f__Beijerinckiaceae;g__Roseiarcus;s__
f.bin.315	91.31	3.846	12447	3895855	d__Bacteria;p__Proteobacteria;c__Alphaproteobacteria;o__Rhizobiales;f__Xanthobacteraceae;g__Bradyrhizobium;s__
f.bin.319	95.07	1.318	84871	4282609	d__Bacteria;p__Acidobacteriota;c__Vicinamibacteria;o__Vicinamibacterales;f__2-12-FULL-66-21;g__2-12-FULL-66-21;s__
f.bin.325	93.23	4.618	19818	3762588	d__Bacteria;p__Acidobacteriota;c__Acidobacteriae;o__Bryobacterales;f__Bryobacteraceae;g__Solibacter;s__
f.bin.329	94.87	4.444	105556	4355151	d__Bacteria;p__Acidobacteriota;c__Vicinamibacteria;o__Fen-336;f__Fen-336;g__;s__
f.bin.333	95.64	0.862	82272	2616747	d__Bacteria;p__Actinobacteriota;c__Actinomycetia;o__Mycobacteriales;f__Frankiaceae;g__;s__
f.bin.334	98.95	1.566	40924	3685803	d__Bacteria;p__Actinobacteriota;c__Acidimicrobiia;o__Acidimicrobiales;f__Ilumatobacteraceae;g__;s__
f.bin.338	91.45	4.178	235359	4633905	d__Bacteria;p__Proteobacteria;c__Alphaproteobacteria;o__ATCC43930;f__Stellaceae;g__AP-15;s__
f.bin.34	95.6	2.297	15631	3137991	d__Bacteria;p__Planctomycetota;c__Phycisphaerae;o__Phycisphaerales;f__SM1A02;g__;s__
f.bin.340	96.8	1.001	84595	6782654	d__Bacteria;p__Proteobacteria;c__Gammaproteobacteria;o__DSM-16500;f__DSM-16500;g__BMAH01;s__
f.bin.344	98.31	2.564	229942	4833584	d__Bacteria;p__Proteobacteria;c__Gammaproteobacteria;o__Xanthomonadales;f__Xanthomonadaceae;g__;s__
f.bin.347	92.37	1.753	25517	4861315	d__Bacteria;p__Proteobacteria;c__Alphaproteobacteria;o__Sphingomonadales;f__Sphingomonadaceae;g__Sphingomonas;s__
f.bin.350	99.37	1.845	104577	5853521	d__Bacteria;p__Eisenbacteria;c__RBG-16-71-46;o__SZUA-252;f__SZUA-252;g__WS-9;s__
f.bin.353	94.58	1.505	30003	3740318	d__Bacteria;p__Actinobacteriota;c__Acidimicrobiia;o__Acidimicrobiales;f__JACDCH01;g__;s__
f.bin.37	93.4	1.098	496835	3992855	d__Bacteria;p__Actinobacteriota;c__Acidimicrobiia;o__Acidimicrobiales;f__Ilumatobacteraceae;g__;s__
f.bin.42	99.42	0.746	73604	6223475	d__Bacteria;p__Actinobacteriota;c__Thermoleophilia;o__Solirubrobacterales;f__70-9;g__;s__
f.bin.49	98.37	4.054	127389	6123622	d__Bacteria;p__Proteobacteria;c__Gammaproteobacteria;o__SLND01;f__;g__;s__
f.bin.5	94.3	1.709	289902	5085258	d__Bacteria;p__Nitrospirota;c__Nitrospiria;o__Nitrospirales;f__Nitrospiraceae;g__;s__
f.bin.53	94.09	3.846	47501	4342571	d__Bacteria;p__Patescibacteria;c__Microgenomatia;o__Levybacterales;f__UBA12049;g__;s__
f.bin.61	99.34	0.144	178578	2962128	d__Bacteria;p__Actinobacteriota;c__Thermoleophilia;o__Gaiellales;f__Gaiellaceae;g__JACCRW01;s__
f.bin.63	96.86	0.678	68959	5752967	d__Bacteria;p__Desulfobacterota_B;c__Binatia;o__UBA9968;f__UBA9968;g__2-12-FULL-60-19;s__
f.bin.65	99.26	1.001	209443	7761346	d__Bacteria;p__Acidobacteriota;c__Blastocatellia;o__UBA7656;f__UBA7656;g__;s__
f.bin.66	91.97	1.481	20465	2598383	d__Bacteria;p__Acidobacteriota;c__Acidobacteriae;o__UBA7541;f__UBA7541;g__UBA7541;s__
f.bin.68	96.29	1.65	55316	5472781	d__Bacteria;p__Verrucomicrobiota;c__Verrucomicrobiae;o__Chthoniobacterales;f__UBA10450;g__;s__
f.bin.8	96.21	4.454	22653	4662542	d__Bacteria;p__Actinobacteriota;c__Thermoleophilia;o__Solirubrobacterales;f__70-9;g__;s__
f.bin.9	91.88	1.724	31479	5906560	d__Bacteria;p__Gemmatimonadota;c__Gemmatimonadetes;o__Gemmatimonadales;f__Gemmatimonadaceae;g__UBA4720;s__
f.bin.91	98.9	1.098	72522	3138159	d__Bacteria;p__Methylomirabilota;c__Methylomirabilia;o__Rokubacteriales;f__GWA2-73-35;g__AR5;s__
f.bin.93	98.24	3.07	91322	9500406	d__Bacteria;p__Acidobacteriota;c__Mor1;o__Mor1;f__;g__;s__
f.bin.1	82.52	0	9330	3895670	d__Bacteria;p__Proteobacteria;c__Gammaproteobacteria;o__Burkholderiales;f__SG8-41;g__;s__
f.bin.10	87.92	3.405	19717	5417269	d__Bacteria;p__Bacteroidota;c__Bacteroidia;o__Chitinophagales;f__Chitinophagaceae;g__Flavisolibacter;s__
f.bin.100	72.64	0	6216	2481014	d__Bacteria;p__Proteobacteria;c__Alphaproteobacteria;o__Caulobacterales;f__Hyphomonadaceae;g__Terricaulis;s__
f.bin.101	87.97	1.6	12030	2216702	d__Bacteria;p__Proteobacteria;c__Alphaproteobacteria;o__Rhizobiales;f__Xanthobacteraceae;g__Pseudolabrys;s__
f.bin.102	70.29	1.724	24666	3626267	d__Bacteria;p__Acidobacteriota;c__Acidobacteriae;o__Acidobacteriales;f__Koribacteraceae;g__;s__
f.bin.103	78.68	3.995	7281	3719464	d__Bacteria;p__Proteobacteria;c__Alphaproteobacteria;o__Micropepsales;f__Micropepsaceae;g__;s__
f.bin.105	77.09	2.991	9890	4504213	d__Bacteria;p__Proteobacteria;c__Gammaproteobacteria;o__Burkholderiales;f__SG8-39;g__SCGC-AG-212-J23;s__
f.bin.110	77.32	1.648	12034	3619911	d__Bacteria;p__Acidobacteriota;c__Vicinamibacteria;o__Fen-336;f__Fen-336;g__;s__
f.bin.116	73.77	0	11568	2444789	d__Bacteria;p__Acidobacteriota;c__Acidobacteriae;o__Acidobacteriales;f__Koribacteraceae;g__;s__
f.bin.120	70.58	0	20151	2731721	d__Bacteria;p__Acidobacteriota;c__Blastocatellia;o__UBA7656;f__UBA7656;g__UBA7656;s__
f.bin.122	70.21	2.136	16268	3628620	d__Bacteria;p__Proteobacteria;c__Gammaproteobacteria;o__Nevskiales;f__Nevskiaceae;g__Nevskia;s__
f.bin.124	88.45	4.612	9296	4745798	d__Bacteria;p__Actinobacteriota;c__Thermoleophilia;o__Solirubrobacterales;f__Solirubrobacteraceae;g__;s__
f.bin.127	80.92	4.7	21974	5055423	d__Bacteria;p__Proteobacteria;c__Gammaproteobacteria;o__Nevskiales;f__Nevskiaceae;g__;s__
f.bin.129	73.14	3.482	9889	5870124	d__Bacteria;p__Gemmatimonadota;c__Gemmatimonadetes;o__Gemmatimonadales;f__Gemmatimonadaceae;g__;s__
f.bin.130	70.7	2.472	6302	2572587	d__Bacteria;p__Proteobacteria;c__Alphaproteobacteria;o__Micropepsales;f__Micropepsaceae;g__Rhizomicrobium;s__
f.bin.131	74.26	4.326	9523	5752448	d__Bacteria;p__Proteobacteria;c__Alphaproteobacteria;o__Rhizobiales;f__Xanthobacteraceae;g__Pseudolabrys;s__
f.bin.132	78.22	0.326	9877	2673436	d__Bacteria;p__Planctomycetota;c__Phycisphaerae;o__Phycisphaerales;f__SM1A02;g__F1-120-MAGs238;s__
f.bin.134	78.31	4.385	13524	8889453	d__Bacteria;p__Actinobacteriota;c__Actinomycetia;o__Streptosporangiales;f__Streptosporangiaceae;g__UBA9676;s__
f.bin.135	80.45	0	71754	817851	d__Bacteria;p__Desulfobacterota_B;c__Binatia;o__UBA9968;f__UBA9968;g__DP-20;s__
f.bin.138	81.57	4.945	18303	2833400	d__Bacteria;p__Bacteroidota;c__Bacteroidia;o__Chitinophagales;f__Chitinophagaceae;g__Puia;s__
f.bin.139	87.33	1.12	12794	2721524	d__Bacteria;p__Acidobacteriota;c__Thermoanaerobaculia;o__UBA5066;f__Gp7-AA6;g__;s__
f.bin.14	77.65	4.985	3873	4908772	d__Bacteria;p__Acidobacteriota;c__Acidobacteriae;o__Acidobacteriales;f__Koribacteraceae;g__JABDBE01;s__
f.bin.140	72.58	1.114	5250	2051012	d__Bacteria;p__Proteobacteria;c__Gammaproteobacteria;o__Burkholderiales;f__SG8-39;g__SCGC-AG-212-J23;s__
f.bin.145	87.56	0.387	8368	3598411	d__Bacteria;p__Myxococcota;c__Polyangia;o__Haliangiales;f__Haliangiaceae;g__JABFXX01;s__
f.bin.148	73.4	0	14835	653600	d__Bacteria;p__Proteobacteria;c__Gammaproteobacteria;o__Steroidobacterales;f__Steroidobacteraceae;g__13-2-20CM-66-19;s__
f.bin.15	75.9	2.445	13754	3048862	d__Bacteria;p__Acidobacteriota;c__Thermoanaerobaculia;o__Gp7-AA8;f__Gp7-AA8;g__;s__
f.bin.152	78.66	3.508	6236	3774489	d__Bacteria;p__Proteobacteria;c__Alphaproteobacteria;o__Micropepsales;f__Micropepsaceae;g__Rhizomicrobium;s__
f.bin.156	82.55	3.418	11076	4417791	d__Bacteria;p__Actinobacteriota;c__Thermoleophilia;o__Gaiellales;f__Gaiellaceae;g__AC-32;s__
f.bin.157	80.06	2.641	9866	4523176	d__Bacteria;p__Desulfobacterota_B;c__Binatia;o__UBA9968;f__UBA9968;g__;s__
f.bin.159	85.7	2	6014	3584705	d__Bacteria;p__Eisenbacteria;c__RBG-16-71-46;o__RBG-16-71-46;f__RBG-16-71-46;g__WS-3;s__
f.bin.162	81.22	3.356	18628	4907609	d__Bacteria;p__Myxococcota;c__Polyangia;o__Haliangiales;f__Haliangiaceae;g__JABFXX01;s__
f.bin.164	81.34	0.862	38013	4127805	d__Bacteria;p__Patescibacteria;c__Saccharimonadia;o__Saccharimonadales;f__UBA4665;g__;s__
f.bin.165	84.35	3.667	7559	3726615	d__Bacteria;p__Planctomycetota;c__Phycisphaerae;o__Phycisphaerales;f__SM1A02;g__F1-120-MAGs238;s__
f.bin.167	77.79	2.4	5718	1886985	d__Bacteria;p__Acidobacteriota;c__Thermoanaerobaculia;o__UBA5066;f__Gp7-AA6;g__;s__
f.bin.168	78.9	1.931	8311	3201065	d__Bacteria;p__Acidobacteriota;c__Acidobacteriae;o__Bryobacterales;f__Bryobacteraceae;g__Palsa-187;s__
f.bin.169	71.55	4.31	9793	564409	d__Bacteria;p__Actinobacteriota;c__UBA4738;o__UBA4738;f__HRBIN12;g__;s__
f.bin.17	81.85	2.586	7266	2473465	d__Bacteria;p__Acidobacteriota;c__Thermoanaerobaculia;o__UBA5066;f__;g__;s__
f.bin.172	73.35	1.88	12090	3427867	d__Bacteria;p__Proteobacteria;c__Gammaproteobacteria;o__Steroidobacterales;f__Steroidobacteraceae;g__SCUD01;s__
f.bin.173	88.51	3.04	20069	3183192	d__Bacteria;p__Gemmatimonadota;c__Gemmatimonadetes;o__Gemmatimonadales;f__GWC2-71-9;g__;s__
f.bin.174	87.96	0.603	28932	2387652	d__Bacteria;p__Proteobacteria;c__Gammaproteobacteria;o__Steroidobacterales;f__Steroidobacteraceae;g__;s__
f.bin.179	88.75	2.832	10393	4051835	d__Bacteria;p__Actinobacteriota;c__Actinomycetia;o__Mycobacteriales;f__Pseudonocardiaceae;g__;s__
f.bin.181	70.17	3.448	17250	5116875	d__Bacteria;p__Acidobacteriota;c__Vicinamibacteria;o__Vicinamibacterales;f__2-12-FULL-66-21;g__2-12-FULL-66-21;s__
f.bin.183	87.27	3.353	11932	3245808	d__Bacteria;p__Gemmatimonadota;c__Gemmatimonadetes;o__Gemmatimonadales;f__Gemmatimonadaceae;g__AG2;s__
f.bin.188	71.31	2.507	6736	4495802	d__Bacteria;p__Proteobacteria;c__Gammaproteobacteria;o__Steroidobacterales;f__;g__;s__
f.bin.189	81.5	1.724	7053	3011560	d__Bacteria;p__Proteobacteria;c__Gammaproteobacteria;o__Pseudomonadales;f__Spongiibacteraceae;g__;s__
f.bin.190	88.82	2.971	11934	3383042	d__Bacteria;p__Bacteroidota;c__Bacteroidia;o__Chitinophagales;f__Chitinophagaceae;g__Puia;s__
f.bin.191	83.4	1.582	21344	3367277	d__Bacteria;p__Proteobacteria;c__Gammaproteobacteria;o__Burkholderiales;f__Burkholderiaceae;g__Ramlibacter;s__
f.bin.192	73.02	3.611	9498	3804170	d__Archaea;p__Thermoplasmatota;c__E2;o__UBA9212;f__;g__;s__
f.bin.194	72.26	1.935	5834	4445690	d__Bacteria;p__Gemmatimonadota;c__Gemmatimonadetes;o__Gemmatimonadales;f__GWC2-71-9;g__JABFSM01;s__
f.bin.195	86.63	2.709	7938	5854976	d__Bacteria;p__Acidobacteriota;c__Blastocatellia;o__Pyrinomonadales;f__Pyrinomonadaceae;g__UBA11740;s__
f.bin.199	76.02	3.387	6614	8513930	d__Bacteria;p__Verrucomicrobiota;c__Verrucomicrobiae;o__Pedosphaerales;f__SIBH01;g__;s__
f.bin.20	74.13	4.31	11820	7258016	d__Bacteria;p__Bacteroidota;c__Bacteroidia;o__Chitinophagales;f__UBA10324;g__;s__
f.bin.201	81.23	3.534	9779	2393230	d__Bacteria;p__Proteobacteria;c__Alphaproteobacteria;o__Sphingomonadales;f__Sphingomonadaceae;g__Sphingomicrobium;s__
f.bin.205	73.26	0.99	142401	879755	d__Archaea;p__Thermoproteota;c__Nitrososphaeria;o__Nitrososphaerales;f__Nitrososphaeraceae;g__TA-21;s__
f.bin.206	71.56	0.568	4403	3685508	d__Bacteria;p__Bacteroidota;c__Bacteroidia;o__Chitinophagales;f__Chitinophagaceae;g__46-32;s__
f.bin.207	85.25	1.282	10792	4229743	d__Bacteria;p__Acidobacteriota;c__Mor1;o__QHYA01;f__;g__;s__
f.bin.209	83.76	0.854	16240	2371441	d__Bacteria;p__Proteobacteria;c__Gammaproteobacteria;o__Steroidobacterales;f__Steroidobacteraceae;g__FEN-1191;s__
f.bin.21	83.81	1.709	9080	3427021	d__Bacteria;p__Proteobacteria;c__Gammaproteobacteria;o__Xanthomonadales;f__Rhodanobacteraceae;g__;s__
f.bin.210	79.16	3.055	8126	2216791	d__Bacteria;p__Proteobacteria;c__Gammaproteobacteria;o__Steroidobacterales;f__Steroidobacteraceae;g__;s__
f.bin.213	87.8	2.316	10705	8125625	d__Bacteria;p__Acidobacteriota;c__Acidobacteriae;o__UBA7541;f__UBA7541;g__;s__
f.bin.217	70.9	2.095	155033	2848898	d__Bacteria;p__Acidobacteriota;c__Acidobacteriae;o__Acidobacteriales;f__Koribacteraceae;g__;s__
f.bin.219	86.12	4.75	14774	4494915	d__Bacteria;p__Proteobacteria;c__Gammaproteobacteria;o__Burkholderiales;f__Burkholderiaceae;g__Caballeronia;s__
f.bin.220	89.13	4.945	17055	6327741	d__Bacteria;p__Myxococcota;c__Polyangia;o__Polyangiales;f__Polyangiaceae;g__;s__
f.bin.224	80.43	3.982	23081	2713900	d__Bacteria;p__Planctomycetota;c__Phycisphaerae;o__Phycisphaerales;f__SM1A02;g__;s__
f.bin.225	81.67	2.669	6053	1738800	d__Bacteria;p__Proteobacteria;c__Gammaproteobacteria;o__Burkholderiales;f__Burkholderiaceae;g__Cupriavidus;s__Cupriavidus sp000955785
f.bin.226	73.18	1.674	5370	4199785	d__Bacteria;p__Acidobacteriota;c__Thermoanaerobaculia;o__Gp7-AA8;f__Gp7-AA8;g__;s__
f.bin.228	75.56	0.907	6525	2219132	d__Bacteria;p__Proteobacteria;c__Alphaproteobacteria;o__Caulobacterales;f__Caulobacteraceae;g__Phenylobacterium;s__
f.bin.231	74.38	1.81	5915	4730516	d__Bacteria;p__Acidobacteriota;c__Acidobacteriae;o__UBA7541;f__UBA7541;g__UBA7541;s__
f.bin.235	86.96	1.825	8093	6552519	d__Bacteria;p__Acidobacteriota;c__Vicinamibacteria;o__Vicinamibacterales;f__UBA2999;g__;s__
f.bin.237	72.86	4.464	8481	3651550	d__Bacteria;p__Myxococcota;c__Polyangia;o__Palsa-1104;f__Fen-1088;g__;s__
f.bin.240	77.74	0.354	20695	5650403	d__Bacteria;p__Planctomycetota;c__Planctomycetes;o__Pirellulales;f__Pirellulaceae;g__SXOA01;s__
f.bin.241	86.93	2.75	6568	5407788	d__Bacteria;p__Verrucomicrobiota;c__Verrucomicrobiae;o__Verrucomicrobiales;f__Verrucomicrobiaceae;g__Prosthecobacter;s__
f.bin.242	88.19	2.564	37108	4341223	d__Bacteria;p__Acidobacteriota;c__Acidobacteriae;o__Acidobacteriales;f__Koribacteraceae;g__JABCZH01;s__
f.bin.243	89.01	0.549	18498	4033552	d__Bacteria;p__Eisenbacteria;c__RBG-16-71-46;o__RBG-16-71-46;f__RBG-16-71-46;g__WS-3;s__
f.bin.244	85.05	2.807	14381	8291965	d__Bacteria;p__Acidobacteriota;c__Acidobacteriae;o__Bryobacterales;f__Bryobacteraceae;g__Sulfopaludibacter;s__
f.bin.246	84.63	2.136	18615	3503503	d__Bacteria;p__Actinobacteriota;c__Acidimicrobiia;o__Acidimicrobiales;f__JACDCH01;g__;s__
f.bin.248	76.42	2.752	9994	2138723	d__Bacteria;p__Acidobacteriota;c__Mor1;o__Mor1;f__;g__;s__
f.bin.249	78.05	0	38352	4227384	d__Bacteria;p__Chloroflexota;c__Ellin6529;o__CSP1-4;f__CSP1-4;g__Palsa-1033;s__
f.bin.253	81.62	1.709	17220	3547224	d__Bacteria;p__Chloroflexota;c__Ellin6529;o__CSP1-4;f__CSP1-4;g__;s__
f.bin.254	85.16	0	13552	2705346	d__Bacteria;p__Gemmatimonadota;c__Gemmatimonadetes;o__Gemmatimonadales;f__GWC2-71-9;g__JABFSM01;s__
f.bin.255	75.19	4.069	5297	4862254	d__Bacteria;p__Acidobacteriota;c__Acidobacteriae;o__Bryobacterales;f__Bryobacteraceae;g__QHXW01;s__
f.bin.258	86.99	1.481	15425	3729940	d__Bacteria;p__Planctomycetota;c__Planctomycetes;o__Planctomycetales;f__UBA10511;g__SIAF01;s__
f.bin.259	86.42	2.955	7108	4681650	d__Bacteria;p__Proteobacteria;c__Gammaproteobacteria;o__Burkholderiales;f__Burkholderiaceae;g__Trinickia;s__
f.bin.26	80.23	2.15	6296	3462060	d__Bacteria;p__Actinobacteriota;c__Thermoleophilia;o__Solirubrobacterales;f__70-9;g__VAYN01;s__
f.bin.262	75.38	1.754	6897	6595678	d__Bacteria;p__Acidobacteriota;c__Acidobacteriae;o__UBA7541;f__UBA7541;g__UBA7541;s__
f.bin.265	89.72	3.791	14427	3104958	d__Bacteria;p__Gemmatimonadota;c__Gemmatimonadetes;o__Gemmatimonadales;f__GWC2-71-9;g__;s__
f.bin.268	85.55	2.056	16888	4609545	d__Bacteria;p__Actinobacteriota;c__Actinomycetia;o__Mycobacteriales;f__Pseudonocardiaceae;g__Pseudonocardia;s__
f.bin.273	81.9	1.098	50220	2985178	d__Bacteria;p__Chloroflexota;c__Ellin6529;o__CSP1-4;f__CSP1-4;g__C-114;s__
f.bin.275	83.04	3.793	20228	5308628	d__Bacteria;p__Bacteroidota;c__Bacteroidia;o__NS11-12g;f__UBA955;g__;s__
f.bin.28	72.89	3.87	9525	3609940	d__Bacteria;p__Gemmatimonadota;c__Gemmatimonadetes;o__Gemmatimonadales;f__GWC2-71-9;g__SHZT01;s__
f.bin.281	78.61	2.197	10516	2641878	d__Bacteria;p__Bacteroidota;c__Bacteroidia;o__Chitinophagales;f__Chitinophagaceae;g__Niastella;s__
f.bin.282	71.55	0	15379	3136530	d__Bacteria;p__Actinobacteriota;c__Actinomycetia;o__Actinomycetales;f__Microbacteriaceae;g__Diaminobutyricibacter;s__
f.bin.283	70.05	3.709	8560	5608745	d__Bacteria;p__Myxococcota;c__Polyangia;o__Polyangiales;f__Polyangiaceae;g__;s__
f.bin.284	76.32	2.928	5103	1966787	d__Bacteria;p__Verrucomicrobiota;c__Verrucomicrobiae;o__Chthoniobacterales;f__UBA10450;g__AV40;s__
f.bin.286	82.16	3.589	5753	5717427	d__Bacteria;p__Acidobacteriota;c__Acidobacteriae;o__Bryobacterales;f__Bryobacteraceae;g__JACMLA01;s__
f.bin.289	70.34	1.923	4928	2657541	d__Bacteria;p__Acidobacteriota;c__Blastocatellia;o__Pyrinomonadales;f__Pyrinomonadaceae;g__UBA11740;s__
f.bin.290	72.57	0	9979	3407665	d__Bacteria;p__Proteobacteria;c__Alphaproteobacteria;o__Sphingomonadales;f__Sphingomonadaceae;g__Sphingomicrobium;s__
f.bin.291	87.7	4.059	8594	4339112	d__Bacteria;p__Proteobacteria;c__Gammaproteobacteria;o__Burkholderiales;f__SG8-39;g__SCGC-AG-212-J23;s__
f.bin.293	86.04	4.166	19029	5102692	d__Bacteria;p__Bacteroidota;c__Bacteroidia;o__Chitinophagales;f__Chitinophagaceae;g__Niastella;s__
f.bin.296	85.72	2.777	11703	3048967	d__Bacteria;p__Eremiobacterota;c__Eremiobacteria;o__Baltobacterales;f__Baltobacteraceae;g__Cybelea;s__
f.bin.297	71.51	4.394	5305	4805542	d__Bacteria;p__Proteobacteria;c__Alphaproteobacteria;o__Rhizobiales;f__Xanthobacteraceae;g__Pseudolabrys;s__
f.bin.300	79.99	4.395	8869	3466452	d__Bacteria;p__Acidobacteriota;c__Acidobacteriae;o__Acidobacteriales;f__Koribacteraceae;g__Sulfotelmatobacter;s__
f.bin.301	74.17	1.666	5280	4288398	d__Bacteria;p__Actinobacteriota;c__Actinomycetia;o__Mycobacteriales;f__;g__;s__
f.bin.305	88.41	3.296	30944	3430704	d__Bacteria;p__Gemmatimonadota;c__Gemmatimonadetes;o__Gemmatimonadales;f__Gemmatimonadaceae;g__AG2;s__
f.bin.309	85.91	4.657	7045	6090492	d__Bacteria;p__Gemmatimonadota;c__Gemmatimonadetes;o__Gemmatimonadales;f__GWC2-71-9;g__;s__
f.bin.31	86.35	1.724	15508	3319109	d__Bacteria;p__Acidobacteriota;c__Thermoanaerobaculia;o__UBA5066;f__Gp7-AA6;g__;s__
f.bin.310	84.76	0.543	11704	3210596	d__Bacteria;p__Gemmatimonadota;c__Gemmatimonadetes;o__Gemmatimonadales;f__GWC2-71-9;g__AG25;s__
f.bin.311	84.76	1.371	8012	4001484	d__Bacteria;p__Proteobacteria;c__Alphaproteobacteria;o__Reyranellales;f__Reyranellaceae;g__Reyranella;s__
f.bin.314	80.16	0.949	4747	4022298	d__Bacteria;p__Acidobacteriota;c__Acidobacteriae;o__Bryobacterales;f__Bryobacteraceae;g__Palsa-187;s__
f.bin.317	84.15	1.98	24523	2583110	d__Bacteria;p__Acidobacteriota;c__Acidobacteriae;o__Bryobacterales;f__Bryobacteraceae;g__;s__
f.bin.318	77.94	4.922	13680	3296876	d__Bacteria;p__Acidobacteriota;c__Vicinamibacteria;o__Vicinamibacterales;f__2-12-FULL-66-21;g__;s__
f.bin.32	74.76	3.396	5879	3312492	d__Bacteria;p__Methylomirabilota;c__Methylomirabilia;o__Rokubacteriales;f__GWA2-73-35;g__AR5;s__
f.bin.320	85.6	2.442	6763	2098988	d__Bacteria;p__Actinobacteriota;c__Actinomycetia;o__Streptosporangiales;f__Streptosporangiaceae;g__Actinocorallia;s__
f.bin.321	79.13	1.136	14420	5278075	d__Bacteria;p__Desulfobacterota_B;c__Binatia;o__UBA9968;f__UBA9968;g__DP-20;s__
f.bin.322	79.32	4.178	4779	8287284	d__Bacteria;p__Nitrospirota;c__Nitrospiria;o__Nitrospirales;f__Nitrospiraceae;g__Palsa-1315;s__
f.bin.323	77.21	1.284	6053	3449432	d__Bacteria;p__Gemmatimonadota;c__Gemmatimonadetes;o__Gemmatimonadales;f__Gemmatimonadaceae;g__UBA4720;s__
f.bin.324	79.82	2.93	5877	7412396	d__Bacteria;p__Acidobacteriota;c__Thermoanaerobaculia;o__UBA5066;f__Gp7-AA6;g__;s__
f.bin.327	85.08	2.096	19199	7619605	d__Bacteria;p__Myxococcota;c__Polyangia;o__Palsa-1104;f__Palsa-1104;g__;s__
f.bin.33	71.42	2.364	5700	2742430	d__Bacteria;p__Proteobacteria;c__Gammaproteobacteria;o__Nevskiales;f__;g__;s__
f.bin.330	70.24	3.504	4993	3792352	d__Bacteria;p__Proteobacteria;c__Gammaproteobacteria;o__Xanthomonadales;f__Ahniellaceae;g__;s__
f.bin.336	71.89	4.31	12367	9330351	d__Bacteria;p__Acidobacteriota;c__Vicinamibacteria;o__Fen-336;f__Fen-336;g__;s__
f.bin.337	72.48	2.747	5072	1631521	d__Bacteria;p__Acidobacteriota;c__Acidobacteriae;o__UBA7541;f__UBA7541;g__;s__
f.bin.342	75.24	0.99	23047	1508185	d__Bacteria;p__Acidobacteriota;c__Vicinamibacteria;o__Vicinamibacterales;f__UBA2999;g__2-02-FULL-65-29;s__
f.bin.346	71.7	1.724	7584	4719681	d__Bacteria;p__Proteobacteria;c__Alphaproteobacteria;o__Rhizobiales;f__Xanthobacteraceae;g__Pseudolabrys;s__
f.bin.348	84.91	3.409	28710	4763953	d__Bacteria;p__Actinobacteriota;c__Acidimicrobiia;o__IMCC26256;f__PALSA-610;g__PALSA-610;s__
f.bin.351	85.81	2.608	8811	6985189	d__Bacteria;p__Proteobacteria;c__Gammaproteobacteria;o__Steroidobacterales;f__Steroidobacteraceae;g__CAIKZZ01;s__
f.bin.352	70.91	0.595	19723	3204984	d__Bacteria;p__Acidobacteriota;c__Thermoanaerobaculia;o__UBA5066;f__Gp7-AA6;g__;s__
f.bin.354	84.37	1.799	11145	2327027	d__Bacteria;p__Planctomycetota;c__UBA1135;o__PLA2;f__;g__;s__
f.bin.355	73.56	2.272	10952	3155293	d__Bacteria;p__Proteobacteria;c__Alphaproteobacteria;o__Rhizobiales;f__Xanthobacteraceae;g__BOG-931;s__
f.bin.4	89.49	1.107	35827	3681343	d__Bacteria;p__Gemmatimonadota;c__Gemmatimonadetes;o__Gemmatimonadales;f__Gemmatimonadaceae;g__UBA4720;s__
f.bin.43	73.09	2.197	9064	3155663	d__Bacteria;p__Acidobacteriota;c__Acidobacteriae;o__UBA7541;f__UBA7541;g__;s__
f.bin.44	83.02	2.197	12070	3596022	d__Bacteria;p__Chloroflexota;c__Ellin6529;o__CSP1-4;f__CSP1-4;g__SPCO01;s__
f.bin.45	71.45	0.99	53524	1237045	d__Bacteria;p__Proteobacteria;c__Alphaproteobacteria;o__Acetobacterales;f__Acetobacteraceae;g__Palsa-883;s__
f.bin.46	82.38	1.478	5738	3062579	d__Bacteria;p__Proteobacteria;c__Alphaproteobacteria;o__Sphingomonadales;f__Sphingomonadaceae;g__Sphingomonas_I;s__
f.bin.50	72.71	4.772	5893	3970132	d__Bacteria;p__Planctomycetota;c__Phycisphaerae;o__UBA1161;f__UBA1161;g__DTNO01;s__
f.bin.51	84.35	4.293	8432	5671052	d__Bacteria;p__Proteobacteria;c__Alphaproteobacteria;o__Rhizobiales;f__Xanthobacteraceae;g__Palsa-892;s__
f.bin.52	86.12	3.391	7312	2085950	d__Bacteria;p__Proteobacteria;c__Gammaproteobacteria;o__Steroidobacterales;f__Steroidobacteraceae;g__Bog-1198;s__
f.bin.57	87.9	4.273	60831	6864477	d__Bacteria;p__Gemmatimonadota;c__Gemmatimonadetes;o__Gemmatimonadales;f__Gemmatimonadaceae;g__Palsa-1248;s__
f.bin.58	78.86	3.766	7606	4637468	d__Bacteria;p__Proteobacteria;c__Alphaproteobacteria;o__ATCC43930;f__Stellaceae;g__AP-15;s__
f.bin.6	71.79	4.516	9422	7121279	d__Bacteria;p__Proteobacteria;c__Alphaproteobacteria;o__Rhizobiales;f__Labraceae;g__Labrys;s__
f.bin.60	76.34	3.296	12387	3062140	d__Bacteria;p__Proteobacteria;c__Gammaproteobacteria;o__Burkholderiales;f__SG8-39;g__VBDM01;s__
f.bin.64	76.85	2.339	5610	4670047	d__Bacteria;p__Bacteroidota;c__Bacteroidia;o__Chitinophagales;f__Chitinophagaceae;g__Puia;s__
f.bin.67	70.69	1.727	7886	3133990	d__Bacteria;p__Gemmatimonadota;c__Gemmatimonadetes;o__Gemmatimonadales;f__GWC2-71-9;g__;s__
f.bin.70	86.14	0.912	9432	3463311	d__Bacteria;p__Acidobacteriota;c__Thermoanaerobaculia;o__Gp7-AA8;f__Gp7-AA8;g__;s__
f.bin.72	81.28	0.925	5907	2186390	d__Bacteria;p__Proteobacteria;c__Gammaproteobacteria;o__Burkholderiales;f__UKL13-2;g__GR16-43;s__
f.bin.73	77.11	3.448	4717	1954164	d__Bacteria;p__Chloroflexota;c__Ellin6529;o__CSP1-4;f__CSP1-4;g__UBA5189;s__
f.bin.74	89.88	2.451	13751	3454740	d__Bacteria;p__Proteobacteria;c__Gammaproteobacteria;o__Burkholderiales;f__Burkholderiaceae;g__Duganella;s__Duganella sp013375995
f.bin.79	79.63	3.771	10670	5869017	d__Bacteria;p__Actinobacteriota;c__Thermoleophilia;o__Gaiellales;f__Gaiellaceae;g__PALSA-600;s__
f.bin.80	77.42	4.71	6027	3818440	d__Bacteria;p__Proteobacteria;c__Gammaproteobacteria;o__Steroidobacterales;f__Steroidobacteraceae;g__CAILZL01;s__
f.bin.82	70.32	2.564	8177	4958855	d__Bacteria;p__Bacteroidota;c__Bacteroidia;o__Chitinophagales;f__Chitinophagaceae;g__Flavipsychrobacter;s__
f.bin.83	89.74	4.487	24240	8521206	d__Bacteria;p__Verrucomicrobiota;c__Verrucomicrobiae;o__Pedosphaerales;f__UBA8199;g__PSRM01;s__
f.bin.84	71.11	4.344	14403	5196588	d__Bacteria;p__Eisenbacteria;c__RBG-16-71-46;o__SZUA-252;f__SZUA-252;g__WS-7;s__
f.bin.85	75.84	4.439	8433	3677795	d__Bacteria;p__Acidobacteriota;c__Acidobacteriae;o__Acidobacteriales;f__Koribacteraceae;g__;s__
f.bin.86	87.19	3.91	18239	4190971	d__Bacteria;p__Actinobacteriota;c__Acidimicrobiia;o__Acidimicrobiales;f__Ilumatobacteraceae;g__;s__
f.bin.87	84.32	1.136	6316	6014376	d__Bacteria;p__Chloroflexota;c__Ellin6529;o__CSP1-4;f__CSP1-4;g__SPCO01;s__
f.bin.88	83.61	0.246	12394	3762679	d__Bacteria;p__Chloroflexota;c__Ellin6529;o__P2-11E;f__P2-11E;g__3-1-20CM-2-70-9;s__
f.bin.94	71.14	3.448	35892	4777582	d__Bacteria;p__Proteobacteria;c__Gammaproteobacteria;o__Burkholderiales;f__Burkholderiaceae;g__Ramlibacter;s__
f.bin.95	86.72	1.709	10349	3144468	d__Bacteria;p__Proteobacteria;c__Alphaproteobacteria;o__Micropepsales;f__Micropepsaceae;g__CAIYRG01;s__
f.bin.96	87.19	3.095	9702	5989643	d__Bacteria;p__Gemmatimonadota;c__Gemmatimonadetes;o__Gemmatimonadales;f__GWC2-71-9;g__Palsa-1233;s__
f.bin.97	86.4	1.29	28813	7359648	d__Archaea;p__Thermoplasmatota;c__E2;o__UBA9212;f__GCA-002838935;g__;s__
f.bin.98	89.78	1.075	24821	2255209	d__Bacteria;p__Planctomycetota;c__Planctomycetes;o__Gemmatales;f__Gemmataceae;g__Gemmata;s__
f.bin.99	81.51	2.828	6382	1989462	d__Bacteria;p__Actinobacteriota;c__Actinomycetia;o__Streptomycetales;f__Streptomycetaceae;g__Streptomyces;s__
f.bin.113	95.51	6.837	74467	8706849	d__Bacteria;p__Chloroflexota;c__Chloroflexia;o__54-19;f__;g__;s__
f.bin.121	92.73	7.977	9225	6924927	d__Bacteria;p__Gemmatimonadota;c__Gemmatimonadetes;o__Gemmatimonadales;f__Gemmatimonadaceae;g__AG2;s__
f.bin.126	96.83	8.692	34354	7409896	d__Bacteria;p__Proteobacteria;c__Alphaproteobacteria;o__Rhizobiales;f__Aestuariivirgaceae;g__CABJBCQ01;s__
f.bin.146	93.43	5.495	46623	4590924	d__Bacteria;p__Methylomirabilota;c__Methylomirabilia;o__Rokubacteriales;f__GWA2-73-35;g__;s__
f.bin.166	90.83	9.655	20327	2542161	d__Bacteria;p__Myxococcota;c__Polyangia;o__Haliangiales;f__Haliangiaceae;g__WYBA01;s__
f.bin.171	93.01	7.264	18028	6308768	d__Bacteria;p__Proteobacteria;c__Gammaproteobacteria;o__Steroidobacterales;f__Steroidobacteraceae;g__CADEED01;s__
f.bin.177	97.43	7.15	81119	4104087	d__Bacteria;p__Acidobacteriota;c__Mor1;o__Mor1;f__;g__;s__
f.bin.193	93.44	6.149	23858	7809374	d__Bacteria;p__Verrucomicrobiota;c__Verrucomicrobiae;o__Chthoniobacterales;f__UBA10450;g__AV40;s__
f.bin.202	91.97	6.29	39682	9106671	d__Bacteria;p__Proteobacteria;c__Gammaproteobacteria;o__Burkholderiales;f__Burkholderiaceae;g__;s__
f.bin.204	90.9	6.29	23303	13604387	d__Bacteria;p__Nitrospirota;c__Nitrospiria;o__Nitrospirales;f__Nitrospiraceae;g__Nitrospira_C;s__
f.bin.208	90.65	7.565	18558	9711220	d__Bacteria;p__Chloroflexota;c__Dehalococcoidia;o__UBA2991;f__UBA2991;g__PNKC01;s__
f.bin.222	98.64	9.773	65163	8292039	d__Bacteria;p__Actinobacteriota;c__Thermoleophilia;o__Solirubrobacterales;f__70-9;g__VAYN01;s__
f.bin.232	90.05	7.337	9285	6745828	d__Bacteria;p__Actinobacteriota;c__Acidimicrobiia;o__Acidimicrobiales;f__JACDEA01;g__JACDEA01;s__
f.bin.239	91.86	6.463	34248	5828342	d__Bacteria;p__Patescibacteria;c__Saccharimonadia;o__Saccharimonadales;f__JACDFO01;g__;s__
f.bin.279	93.74	7.179	10303	9691659	d__Bacteria;p__Acidobacteriota;c__Vicinamibacteria;o__Vicinamibacterales;f__;g__;s__
f.bin.287	92.42	7.407	39477	3944122	d__Bacteria;p__Eisenbacteria;c__RBG-16-71-46;o__SZUA-252;f__SZUA-252;g__WS-7;s__
f.bin.288	93.16	5.128	23813	6520375	d__Bacteria;p__Acidobacteriota;c__Acidobacteriae;o__UBA7541;f__UBA7541;g__UBA7541;s__
f.bin.302	94.13	7.7	43620	6787596	d__Bacteria;p__Actinobacteriota;c__Actinomycetia;o__Mycobacteriales;f__Micromonosporaceae;g__Actinoplanes;s__
f.bin.306	96.67	5.584	57520	5958668	d__Bacteria;p__Gemmatimonadota;c__Gemmatimonadetes;o__Gemmatimonadales;f__GWC2-71-9;g__Palsa-1233;s__
f.bin.341	92.94	9.561	6788	3575527	d__Bacteria;p__Proteobacteria;c__Alphaproteobacteria;o__Rhizobiales;f__Xanthobacteraceae;g__Bradyrhizobium;s__
f.bin.343	94.22	9.24	34298	8585345	d__Bacteria;p__Proteobacteria;c__Gammaproteobacteria;o__Burkholderiales;f__SG8-40;g__;s__
f.bin.39	91.26	5.608	26705	4093434	d__Bacteria;p__Patescibacteria;c__Microgenomatia;o__Levybacterales;f__UBA12049;g__JACDET01;s__
f.bin.59	92.65	6.721	17549	5043135	d__Bacteria;p__Chloroflexota;c__Ktedonobacteria;o__Ktedonobacterales;f__Ktedonobacteraceae;g__CF-113;s__
f.bin.76	94.87	5.299	53711	6752288	d__Bacteria;p__Acidobacteriota;c__Acidobacteriae;o__Acidobacteriales;f__Koribacteraceae;g__Sulfotelmatobacter;s__
f.bin.78	98.29	5.175	141202	5669702	d__Bacteria;p__Proteobacteria;c__Gammaproteobacteria;o__Steroidobacterales;f__Steroidobacteraceae;g__PALSA-1196;s__
f.bin.89	91.35	9.617	61998	6897517	d__Bacteria;p__Proteobacteria;c__Gammaproteobacteria;o__Steroidobacterales;f__Steroidobacteraceae;g__;s__
f.bin.104	85.96	7.229	9571	4396556	d__Bacteria;p__Proteobacteria;c__Alphaproteobacteria;o__ATCC43930;f__Stellaceae;g__AP-15;s__
f.bin.106	77.87	6.943	4997	4353043	d__Bacteria;p__Planctomycetota;c__UBA1135;o__UBA1135;f__GCA-002686595;g__;s__
f.bin.108	77.05	7.758	52326	7349810	d__Bacteria;p__Planctomycetota;c__UBA1135;o__UBA2386;f__UBA2386;g__;s__
f.bin.109	83.84	7.436	42835	3685662	d__Bacteria;p__Proteobacteria;c__Gammaproteobacteria;o__Burkholderiales;f__UKL13-2;g__GR16-43;s__
f.bin.11	84.45	8.306	11436	2431307	d__Bacteria;p__Proteobacteria;c__Gammaproteobacteria;o__Burkholderiales;f__Burkholderiaceae;g__Ramlibacter;s__
f.bin.112	86.37	5.138	14496	3398135	d__Bacteria;p__Acidobacteriota;c__Acidobacteriae;o__Bryobacterales;f__Bryobacteraceae;g__;s__
f.bin.114	72.75	9.424	5634	4248951	d__Bacteria;p__Proteobacteria;c__Gammaproteobacteria;o__Burkholderiales;f__SG8-41;g__;s__
f.bin.12	70.26	5.555	10690	816118	d__Bacteria;p__Bacteroidota;c__Bacteroidia;o__Chitinophagales;f__Chitinophagaceae;g__JJ008;s__
f.bin.123	87.5	6.593	9609	3601975	d__Bacteria;p__Proteobacteria;c__Alphaproteobacteria;o__Sphingomonadales;f__Sphingomonadaceae;g__Sphingobium;s__
f.bin.128	72.11	7.49	3232	2952174	d__Bacteria;p__Planctomycetota;c__Phycisphaerae;o__Phycisphaerales;f__SM1A02;g__JACMLW01;s__
f.bin.13	73.43	6.034	8781	4724122	d__Bacteria;p__Proteobacteria;c__Alphaproteobacteria;o__Caulobacterales;f__Caulobacteraceae;g__Phenylobacterium;s__
f.bin.137	88.91	6.41	13299	5417012	d__Bacteria;p__Gemmatimonadota;c__Gemmatimonadetes;o__Gemmatimonadales;f__GWC2-71-9;g__;s__
f.bin.143	82.09	6.936	26687	6860824	d__Bacteria;p__Proteobacteria;c__Gammaproteobacteria;o__Burkholderiales;f__SG8-39;g__SCGC-AG-212-J23;s__
f.bin.144	87.74	7.649	9307	5569885	d__Bacteria;p__Acidobacteriota;c__Acidobacteriae;o__UBA7541;f__UBA7541;g__Palsa-147;s__
f.bin.150	80.91	8.768	16541	3163493	d__Bacteria;p__Proteobacteria;c__Alphaproteobacteria;o__Rhizobiales;f__Xanthobacteraceae;g__Pseudolabrys;s__
f.bin.153	87.38	7.583	7555	5755854	d__Bacteria;p__Gemmatimonadota;c__Gemmatimonadetes;o__Gemmatimonadales;f__Gemmatimonadaceae;g__AG2;s__
f.bin.154	75.51	5.172	21144	6084960	d__Bacteria;p__Proteobacteria;c__Gammaproteobacteria;o__Burkholderiales;f__SHXO01;g__;s__
f.bin.155	83.71	8.329	10978	11450359	d__Bacteria;p__Proteobacteria;c__Alphaproteobacteria;o__Acetobacterales;f__Acetobacteraceae;g__Palsa-883;s__
f.bin.161	76.2	6.034	12503	3457663	d__Bacteria;p__Gemmatimonadota;c__Gemmatimonadetes;o__Gemmatimonadales;f__GWC2-71-9;g__DSTP01;s__
f.bin.170	87.34	9.814	24847	4900534	d__Bacteria;p__Gemmatimonadota;c__Gemmatimonadetes;o__Gemmatimonadales;f__Gemmatimonadaceae;g__UBA4720;s__
f.bin.175	74.71	5.494	8116	2497348	d__Bacteria;p__Patescibacteria;c__Microgenomatia;o__Levybacterales;f__UBA12049;g__;s__
f.bin.176	70.38	6.537	10702	6013228	d__Bacteria;p__Proteobacteria;c__Alphaproteobacteria;o__Sphingomonadales;f__Sphingomonadaceae;g__Novosphingobium;s__
f.bin.178	74.41	5.765	7378	4689844	d__Bacteria;p__Acidobacteriota;c__Thermoanaerobaculia;o__Gp7-AA8;f__Gp7-AA8;g__Gp7-AA10;s__
f.bin.184	87.37	8.547	11966	6524162	d__Bacteria;p__Acidobacteriota;c__Vicinamibacteria;o__Fen-336;f__Fen-336;g__;s__
f.bin.185	79.64	5.27	6738	4698231	d__Bacteria;p__Verrucomicrobiota;c__Verrucomicrobiae;o__Pedosphaerales;f__UBA3939;g__UBA3939;s__
f.bin.187	70.61	7.586	7504	5396648	d__Bacteria;p__Acidobacteriota;c__Acidobacteriae;o__UBA7541;f__UBA7541;g__UBA7541;s__
f.bin.19	71.51	8.791	4589	3041975	d__Bacteria;p__Proteobacteria;c__Alphaproteobacteria;o__Rhizobiales;f__Hyphomicrobiaceae;g__Hyphomicrobium;s__
f.bin.196	79.38	7.122	8451	3050252	d__Bacteria;p__FEN-1099;c__FEN-1099;o__;f__;g__;s__
f.bin.198	75.14	5.409	6356	2900046	d__Bacteria;p__Proteobacteria;c__Gammaproteobacteria;o__DSM-16500;f__DSM-16500;g__JABDGC01;s__
f.bin.2	84.61	6.804	14559	3793303	d__Bacteria;p__Proteobacteria;c__Gammaproteobacteria;o__Steroidobacterales;f__Steroidobacteraceae;g__Bog-1198;s__
f.bin.214	79.31	9.482	29082	8101560	d__Bacteria;p__Proteobacteria;c__Alphaproteobacteria;o__Rhizobiales;f__Xanthobacteraceae;g__;s__
f.bin.216	82.65	5.927	15476	4101060	d__Bacteria;p__Chloroflexota;c__Ellin6529;o__QHBO01;f__QHBO01;g__;s__
f.bin.221	72.9	5.181	6815	3028122	d__Bacteria;p__Gemmatimonadota;c__Gemmatimonadetes;o__Gemmatimonadales;f__GWC2-71-9;g__20CM-2-65-7;s__
f.bin.229	77.06	6.034	10363	4891587	d__Bacteria;p__Acidobacteriota;c__Vicinamibacteria;o__Vicinamibacterales;f__UBA2999;g__Gp6-AA45;s__
f.bin.233	70.54	7.788	3804	6422001	d__Bacteria;p__Proteobacteria;c__Gammaproteobacteria;o__Burkholderiales;f__SHXO01;g__;s__
f.bin.236	75.95	9.686	6146	4984707	d__Bacteria;p__Proteobacteria;c__Gammaproteobacteria;o__UBA6522;f__UBA6522;g__FEN-1219;s__
f.bin.24	85.25	5.698	10345	6044001	d__Bacteria;p__Myxococcota;c__Polyangia;o__Haliangiales;f__Haliangiaceae;g__JABFXX01;s__
f.bin.247	77.27	6.944	7790	3115672	d__Bacteria;p__Gemmatimonadota;c__Gemmatimonadetes;o__Gemmatimonadales;f__GWC2-71-9;g__AG25;s__
f.bin.256	70.31	6.419	10452	2932357	d__Bacteria;p__Proteobacteria;c__Alphaproteobacteria;o__Micropepsales;f__Micropepsaceae;g__Rhizomicrobium;s__
f.bin.271	70.78	5.494	8202	2663500	d__Bacteria;p__Proteobacteria;c__Gammaproteobacteria;o__Burkholderiales;f__SG8-39;g__SCGC-AG-212-J23;s__
f.bin.274	83.46	5.556	10629	6310972	d__Bacteria;p__Proteobacteria;c__Alphaproteobacteria;o__Sphingomonadales;f__Sphingomonadaceae;g__Rhizorhabdus;s__
f.bin.276	87.66	6.491	12796	11110454	d__Bacteria;p__Planctomycetota;c__UBA1135;o__;f__;g__;s__
f.bin.277	89.24	6.837	32606	6462649	d__Bacteria;p__Bacteroidota;c__Bacteroidia;o__Chitinophagales;f__Chitinophagaceae;g__Puia;s__
f.bin.278	88.52	6.602	22650	6589910	d__Bacteria;p__Proteobacteria;c__Gammaproteobacteria;o__Xanthomonadales;f__Rhodanobacteraceae;g__66-474;s__
f.bin.280	72.89	8.352	6871	2876597	d__Bacteria;p__Actinobacteriota;c__Actinomycetia;o__Propionibacteriales;f__Propionibacteriaceae;g__;s__
f.bin.29	79.14	8.048	6266	4347852	d__Bacteria;p__Proteobacteria;c__Alphaproteobacteria;o__Rhizobiales;f__Xanthobacteraceae;g__PALSA-894;s__
f.bin.292	79.75	5.653	5370	5044877	d__Bacteria;p__Proteobacteria;c__Alphaproteobacteria;o__Rhizobiales;f__Xanthobacteraceae;g__Palsa-892;s__
f.bin.294	73.27	6.034	7789	3501951	d__Bacteria;p__Proteobacteria;c__Gammaproteobacteria;o__Burkholderiales;f__Casimicrobiaceae;g__VBCG01;s__
f.bin.30	83.61	5.99	21519	5420289	d__Bacteria;p__Proteobacteria;c__Alphaproteobacteria;o__Acetobacterales;f__Acetobacteraceae;g__Acidocella;s__
f.bin.304	82.58	7.389	18852	4074036	d__Bacteria;p__Acidobacteriota;c__Mor1;o__Mor1;f__;g__;s__
f.bin.307	80.32	6.3	9831	3592407	d__Bacteria;p__Eremiobacterota;c__Eremiobacteria;o__Baltobacterales;f__Baltobacteraceae;g__Tumulicola;s__
f.bin.312	89.9	5.675	39937	6118559	d__Bacteria;p__Gemmatimonadota;c__Gemmatimonadetes;o__Gemmatimonadales;f__GWC2-71-9;g__;s__
f.bin.316	72.98	5.941	4588	2767535	d__Bacteria;p__Elusimicrobiota;c__Elusimicrobia;o__UBA1565;f__UBA9628;g__PALSA-1176;s__
f.bin.326	82.47	6.047	25220	4814408	d__Bacteria;p__Proteobacteria;c__Alphaproteobacteria;o__Rhizobiales;f__Xanthobacteraceae;g__Z2-YC6860;s__
f.bin.328	74.55	6.624	5737	3849293	d__Bacteria;p__Acidobacteriota;c__Vicinamibacteria;o__Fen-336;f__Fen-336;g__AA32;s__
f.bin.331	72.09	5.984	7011	2503581	d__Bacteria;p__Proteobacteria;c__Gammaproteobacteria;o__Steroidobacterales;f__Steroidobacteraceae;g__Steroidobacter_A;s__
f.bin.332	70.02	6.776	4132	3686593	d__Bacteria;p__Acidobacteriota;c__Blastocatellia;o__Pyrinomonadales;f__Pyrinomonadaceae;g__JACVRN01;s__
f.bin.335	73.11	6.358	9917	737865	d__Bacteria;p__Methylomirabilota;c__Methylomirabilia;o__Rokubacteriales;f__;g__;s__
f.bin.339	83.43	5.181	8357	6545489	d__Bacteria;p__Proteobacteria;c__Gammaproteobacteria;o__Burkholderiales;f__SG8-40;g__;s__
f.bin.345	83.31	9.163	7613	7073475	d__Bacteria;p__Proteobacteria;c__Alphaproteobacteria;o__Caulobacterales;f__Caulobacteraceae;g__;s__
f.bin.349	76.99	6.198	4415	4309364	d__Bacteria;p__Acidobacteriota;c__Vicinamibacteria;o__Vicinamibacterales;f__2-12-FULL-66-21;g__;s__
f.bin.35	82.01	8.476	9045	3723972	d__Bacteria;p__Acidobacteriota;c__Acidobacteriae;o__Acidobacteriales;f__Gp1-AA117;g__Gp1-AA17;s__
f.bin.36	85.81	5.465	24352	5045092	d__Bacteria;p__Acidobacteriota;c__Blastocatellia;o__UBA7656;f__UBA7656;g__UBA7656;s__
f.bin.38	77.08	9.7	7376	3664366	d__Bacteria;p__Acidobacteriota;c__Vicinamibacteria;o__Vicinamibacterales;f__UBA2999;g__;s__
f.bin.40	83.96	7.326	39776	6691139	d__Bacteria;p__Gemmatimonadota;c__Gemmatimonadetes;o__Gemmatimonadales;f__GWC2-71-9;g__JACDDX01;s__
f.bin.41	78.26	9.54	6492	6882831	d__Bacteria;p__Gemmatimonadota;c__Gemmatimonadetes;o__Gemmatimonadales;f__GWC2-71-9;g__;s__
f.bin.47	88.08	9.882	8342	3880621	d__Bacteria;p__Planctomycetota;c__Planctomycetes;o__Gemmatales;f__Gemmataceae;g__;s__
f.bin.48	75.94	5.982	4659	5077906	d__Bacteria;p__Bacteroidota;c__Bacteroidia;o__Chitinophagales;f__Chitinophagaceae;g__VBAT01;s__
f.bin.54	81.01	7.147	11904	3504296	d__Bacteria;p__Proteobacteria;c__Alphaproteobacteria;o__Rhizobiales;f__Xanthobacteraceae;g__P52-10;s__
f.bin.55	81.18	5.963	5060	1958283	d__Bacteria;p__Planctomycetota;c__Planctomycetes;o__Pirellulales;f__Pirellulaceae;g__SXOA01;s__
f.bin.56	80.99	8.608	17165	3358074	d__Bacteria;p__Acidobacteriota;c__Vicinamibacteria;o__Vicinamibacterales;f__SCN-69-37;g__SCUN01;s__
f.bin.62	87.45	6.107	11835	4335912	d__Bacteria;p__Gemmatimonadota;c__Gemmatimonadetes;o__Gemmatimonadales;f__GWC2-71-9;g__;s__
f.bin.69	71.86	8.971	5535	2229086	d__Bacteria;p__Bacteroidota;c__Ignavibacteria;o__SJA-28;f__OLB5;g__;s__
f.bin.7	88.63	6.685	14599	3762084	d__Bacteria;p__Acidobacteriota;c__Acidobacteriae;o__Bryobacterales;f__Bryobacteraceae;g__Solibacter;s__
f.bin.71	89.86	6.938	10382	6119987	d__Bacteria;p__Proteobacteria;c__Alphaproteobacteria;o__Rhizobiales;f__Xanthobacteraceae;g__Pseudolabrys;s__
f.bin.75	71.63	8.442	7649	3383669	d__Bacteria;p__Acidobacteriota;c__Blastocatellia;o__Pyrinomonadales;f__Pyrinomonadaceae;g__OLB17;s__
f.bin.77	79.56	9.148	7284	4884623	d__Bacteria;p__Bacteroidota;c__Bacteroidia;o__Sphingobacteriales;f__Sphingobacteriaceae;g__Mucilaginibacter;s__
f.bin.81	74.52	9.615	8464	6496903	d__Bacteria;p__Myxococcota;c__Polyangia;o__Haliangiales;f__Haliangiaceae;g__JABFXX01;s__
f.bin.90	72.89	6.153	12451	6455186	d__Bacteria;p__Omnitrophota;c__Koll11;o__UBA10015;f__GCA-002753745;g__;s__
f.bin.92	82.75	7.852	6767	3227581	d__Bacteria;p__Nitrospirota;c__Nitrospiria;o__;f__;g__;s__

## Sheet: Clustered_dereplicated_MAGs
bin.1	bjsa_g	a	d__Bacteria;p__Acidobacteriota;c__Blastocatellia;o__Pyrinomonadales;f__Pyrinomonadaceae;g__OLB17;s__	Acidobacteriota	Blastocatellia	Pyrinomonadales	362_1
bin.10	bjsa_g	a	d__Bacteria;p__Verrucomicrobiota;c__Verrucomicrobiae;o__Chthoniobacterales;f__UBA10450;g__;s__	Verrucomicrobiota	Verrucomicrobiae	Chthoniobacterales	124_1
bin.100	bjsa_g	a	d__Bacteria;p__Eisenbacteria;c__RBG-16-71-46;o__SZUA-252;f__SZUA-252;g__WS-7;s__	Eisenbacteria	RBG-16-71-46	SZUA-252	325_1
bin.119	bjsa_g	a	d__Bacteria;p__Acidobacteriota;c__Thermoanaerobaculia;o__UBA5066;f__Gp7-AA6;g__;s__	Acidobacteriota	Thermoanaerobaculia	UBA5066	340_1
bin.125	bjsa_g	a	d__Bacteria;p__Acidobacteriota;c__Acidobacteriae;o__Bryobacterales;f__Bryobacteraceae;g__;s__	Acidobacteriota	Acidobacteriae	Bryobacterales	296_1
bin.126	bjsa_g	a	d__Bacteria;p__Acidobacteriota;c__Acidobacteriae;o__UBA7541;f__UBA7541;g__;s__	Acidobacteriota	Acidobacteriae	UBA7541	310_1
bin.127	bjsa_g	a	d__Bacteria;p__Proteobacteria;c__Alphaproteobacteria;o__Micropepsales;f__Micropepsaceae;g__Rhizomicrobium;s__	Proteobacteria	Alphaproteobacteria	Micropepsales	196_1
bin.13	bjsa_g	a	d__Bacteria;p__Planctomycetota;c__Planctomycetes;o__Pirellulales;f__Pirellulaceae;g__;s__	Planctomycetota	Planctomycetes	Pirellulales	223_1
bin.131	bjsa_g	a	d__Bacteria;p__Gemmatimonadota;c__Gemmatimonadetes;o__Gemmatimonadales;f__Gemmatimonadaceae;g__UBA4720;s__	Gemmatimonadota	Gemmatimonadetes	Gemmatimonadales	306_1
bin.138	bjsa_g	a	d__Bacteria;p__Bacteroidota;c__Bacteroidia;o__Chitinophagales;f__Chitinophagaceae;g__Flavisolibacter;s__	Bacteroidota	Bacteroidia	Chitinophagales	33_1
bin.139	bjsa_g	a	d__Bacteria;p__Actinobacteriota;c__Actinomycetia;o__Mycobacteriales;f__;g__;s__	Actinobacteriota	Actinomycetia	Mycobacteriales	79_1
bin.14	bjsa_g	a	d__Bacteria;p__Proteobacteria;c__Gammaproteobacteria;o__Steroidobacterales;f__Steroidobacteraceae;g__CAILZL01;s__	Proteobacteria	Gammaproteobacteria	Steroidobacterales	112_1
bin.140	bjsa_g	a	d__Bacteria;p__Bacteroidota;c__Bacteroidia;o__Chitinophagales;f__Chitinophagaceae;g__UTBCD1;s__	Bacteroidota	Bacteroidia	Chitinophagales	30_1
bin.143	bjsa_g	a	d__Bacteria;p__Proteobacteria;c__Gammaproteobacteria;o__Xanthomonadales;f__Xanthomonadaceae;g__;s__	Proteobacteria	Gammaproteobacteria	Xanthomonadales	263_1
bin.144	bjsa_g	a	d__Bacteria;p__Acidobacteriota;c__Blastocatellia;o__UBA7656;f__UBA7656;g__;s__	Acidobacteriota	Blastocatellia	UBA7656	364_1
bin.147	bjsa_g	a	d__Bacteria;p__Acidobacteriota;c__Acidobacteriae;o__Acidobacteriales;f__Koribacteraceae;g__Sulfotelmatobacter;s__	Acidobacteriota	Acidobacteriae	Acidobacteriales	386_1
bin.159	bjsa_g	a	d__Bacteria;p__Armatimonadota;c__Fimbriimonadia;o__Fimbriimonadales;f__Fimbriimonadaceae;g__;s__	Armatimonadota	Fimbriimonadia	Fimbriimonadales	39_1
bin.16	bjsa_g	a	d__Bacteria;p__Proteobacteria;c__Alphaproteobacteria;o__Sphingomonadales;f__Sphingomonadaceae;g__Allosphingosinicella;s__	Proteobacteria	Alphaproteobacteria	Sphingomonadales	176_1
bin.160	bjsa_g	a	d__Bacteria;p__Proteobacteria;c__Gammaproteobacteria;o__Nevskiales;f__Nevskiaceae;g__;s__	Proteobacteria	Gammaproteobacteria	Nevskiales	249_1
bin.163	bjsa_g	a	d__Bacteria;p__Proteobacteria;c__Alphaproteobacteria;o__Rhizobiales;f__Xanthobacteraceae;g__Pseudolabrys;s__	Proteobacteria	Alphaproteobacteria	Rhizobiales	153_1
bin.166	bjsa_g	a	d__Bacteria;p__Proteobacteria;c__Alphaproteobacteria;o__Sphingomonadales;f__Sphingomonadaceae;g__Allosphingosinicella;s__	Proteobacteria	Alphaproteobacteria	Sphingomonadales	174_1
bin.168	bjsa_g	a	d__Bacteria;p__Proteobacteria;c__Alphaproteobacteria;o__Sphingomonadales;f__Sphingomonadaceae;g__Novosphingobium;s__	Proteobacteria	Alphaproteobacteria	Sphingomonadales	167_1
bin.181	bjsa_g	a	d__Bacteria;p__Actinobacteriota;c__Acidimicrobiia;o__Acidimicrobiales;f__Ilumatobacteraceae;g__;s__	Actinobacteriota	Acidimicrobiia	Acidimicrobiales	94_1
bin.190	bjsa_g	a	d__Bacteria;p__Acidobacteriota;c__Blastocatellia;o__Pyrinomonadales;f__Pyrinomonadaceae;g__;s__	Acidobacteriota	Blastocatellia	Pyrinomonadales	357_1
bin.200	bjsa_g	a	d__Bacteria;p__Acidobacteriota;c__Acidobacteriae;o__Bryobacterales;f__Bryobacteraceae;g__PALSA-129;s__	Acidobacteriota	Acidobacteriae	Bryobacterales	298_1
bin.204	bjsa_g	a	d__Bacteria;p__Proteobacteria;c__Alphaproteobacteria;o__Sphingomonadales;f__Sphingomonadaceae;g__Sphingomonas;s__	Proteobacteria	Alphaproteobacteria	Sphingomonadales	173_1
bin.207	bjsa_g	a	d__Bacteria;p__Bacteroidota;c__Bacteroidia;o__Chitinophagales;f__LD1;g__UBA1941;s__	Bacteroidota	Bacteroidia	Chitinophagales	26_1
bin.21	bjsa_g	a	d__Bacteria;p__Planctomycetota;c__MHYJ01;o__MHYJ01;f__;g__;s__	Planctomycetota	MHYJ01	MHYJ01	285_1
bin.210	bjsa_g	a	d__Bacteria;p__Acidobacteriota;c__Acidobacteriae;o__Acidobacteriales;f__Koribacteraceae;g__;s__	Acidobacteriota	Acidobacteriae	Acidobacteriales	235_1
bin.22	bjsa_g	a	d__Bacteria;p__Verrucomicrobiota;c__Verrucomicrobiae;o__Chthoniobacterales;f__UBA10450;g__AV80;s__	Verrucomicrobiota	Verrucomicrobiae	Chthoniobacterales	121_1
bin.221	bjsa_g	a	d__Bacteria;p__Bacteroidota;c__Bacteroidia;o__Chitinophagales;f__Chitinophagaceae;g__Flavisolibacter;s__	Bacteroidota	Bacteroidia	Chitinophagales	18_1
bin.228	bjsa_g	a	d__Bacteria;p__Actinobacteriota;c__Thermoleophilia;o__Solirubrobacterales;f__Solirubrobacteraceae;g__Palsa-744;s__	Actinobacteriota	Thermoleophilia	Solirubrobacterales	243_1
bin.231	bjsa_g	a	d__Bacteria;p__Eisenbacteria;c__RBG-16-71-46;o__RBG-16-71-46;f__RBG-16-71-46;g__WS-3;s__	Eisenbacteria	RBG-16-71-46	RBG-16-71-46	274_1
bin.235	bjsa_g	a	d__Bacteria;p__Chloroflexota;c__Chloroflexia;o__54-19;f__;g__;s__	Chloroflexota	Chloroflexia	54-19	365_1
bin.238	bjsa_g	a	d__Bacteria;p__Proteobacteria;c__Alphaproteobacteria;o__Sphingomonadales;f__Sphingomonadaceae;g__Sphingomicrobium;s__	Proteobacteria	Alphaproteobacteria	Sphingomonadales	187_1
bin.239	bjsa_g	a	d__Bacteria;p__Planctomycetota;c__Planctomycetes;o__Pirellulales;f__UBA1268;g__;s__	Planctomycetota	Planctomycetes	Pirellulales	320_1
bin.24	bjsa_g	a	d__Bacteria;p__Desulfobacterota_B;c__Binatia;o__UBA9968;f__UBA9968;g__2-12-FULL-60-19;s__	Desulfobacterota_B	Binatia	UBA9968	312_1
bin.243	bjsa_g	a	d__Bacteria;p__Proteobacteria;c__Alphaproteobacteria;o__Rhizobiales;f__Labraceae;g__Labrys;s__	Proteobacteria	Alphaproteobacteria	Rhizobiales	165_1
bin.244	bjsa_g	a	d__Bacteria;p__Chloroflexota;c__Ellin6529;o__QHBO01;f__QHBO01;g__CF-167;s__	Chloroflexota	Ellin6529	QHBO01	106_1
bin.247	bjsa_g	a	d__Bacteria;p__Acidobacteriota;c__Acidobacteriae;o__Bryobacterales;f__Bryobacteraceae;g__QHXW01;s__	Acidobacteriota	Acidobacteriae	Bryobacterales	314_1
bin.259	bjsa_g	a	d__Bacteria;p__Acidobacteriota;c__Vicinamibacteria;o__Vicinamibacterales;f__UBA2999;g__;s__	Acidobacteriota	Vicinamibacteria	Vicinamibacterales	233_1
bin.284	bjsa_g	a	d__Bacteria;p__Proteobacteria;c__Alphaproteobacteria;o__Sphingomonadales;f__Sphingomonadaceae;g__Sphingomicrobium;s__	Proteobacteria	Alphaproteobacteria	Sphingomonadales	188_1
bin.294	bjsa_g	a	d__Bacteria;p__Verrucomicrobiota;c__Verrucomicrobiae;o__Chthoniobacterales;f__Chthoniobacteraceae;g__;s__	Verrucomicrobiota	Verrucomicrobiae	Chthoniobacterales	132_1
bin.296	bjsa_g	a	d__Bacteria;p__Gemmatimonadota;c__Gemmatimonadetes;o__Longimicrobiales;f__RSA9;g__;s__	Gemmatimonadota	Gemmatimonadetes	Longimicrobiales	59_1
bin.297	bjsa_g	a	d__Bacteria;p__Bacteroidota;c__Bacteroidia;o__Chitinophagales;f__Chitinophagaceae;g__Puia;s__	Bacteroidota	Bacteroidia	Chitinophagales	24_1
bin.298	bjsa_g	a	d__Bacteria;p__Proteobacteria;c__Alphaproteobacteria;o__Sphingomonadales;f__Sphingomonadaceae;g__Sphingomicrobium;s__	Proteobacteria	Alphaproteobacteria	Sphingomonadales	190_1
bin.3	bjsa_g	a	d__Bacteria;p__Proteobacteria;c__Gammaproteobacteria;o__Steroidobacterales;f__Steroidobacteraceae;g__13-2-20CM-66-19;s__	Proteobacteria	Gammaproteobacteria	Steroidobacterales	111_1
bin.303	bjsa_g	a	d__Bacteria;p__Bacteroidota;c__Bacteroidia;o__Chitinophagales;f__Chitinophagaceae;g__Parafilimonas;s__	Bacteroidota	Bacteroidia	Chitinophagales	67_1
bin.319	bjsa_g	a	d__Bacteria;p__Acidobacteriota;c__Blastocatellia;o__Pyrinomonadales;f__Pyrinomonadaceae;g__JACVRN01;s__	Acidobacteriota	Blastocatellia	Pyrinomonadales	354_1
bin.321	bjsa_g	a	d__Bacteria;p__Acidobacteriota;c__Acidobacteriae;o__UBA7541;f__UBA7541;g__Palsa-147;s__	Acidobacteriota	Acidobacteriae	UBA7541	343_1
bin.322	bjsa_g	a	d__Bacteria;p__Chloroflexota;c__Ktedonobacteria;o__Ktedonobacterales;f__;g__;s__	Chloroflexota	Ktedonobacteria	Ktedonobacterales	40_1
bin.329	bjsa_g	a	d__Bacteria;p__Acidobacteriota;c__Blastocatellia;o__Pyrinomonadales;f__Pyrinomonadaceae;g__UBA11740;s__	Acidobacteriota	Blastocatellia	Pyrinomonadales	348_1
bin.340	bjsa_g	a	d__Bacteria;p__Proteobacteria;c__Alphaproteobacteria;o__Sphingomonadales;f__Sphingomonadaceae;g__Rhizorhabdus;s__	Proteobacteria	Alphaproteobacteria	Sphingomonadales	172_1
bin.344	bjsa_g	a	d__Bacteria;p__Proteobacteria;c__Gammaproteobacteria;o__Xanthomonadales;f__Rhodanobacteraceae;g__;s__	Proteobacteria	Gammaproteobacteria	Xanthomonadales	265_1
bin.345	bjsa_g	a	d__Bacteria;p__Planctomycetota;c__Planctomycetes;o__Planctomycetales;f__UBA10511;g__SIAF01;s__	Planctomycetota	Planctomycetes	Planctomycetales	73_1
bin.348	bjsa_g	a	d__Bacteria;p__Acidobacteriota;c__Blastocatellia;o__Pyrinomonadales;f__Pyrinomonadaceae;g__OLB17;s__	Acidobacteriota	Blastocatellia	Pyrinomonadales	363_1
bin.350	bjsa_g	a	d__Bacteria;p__Armatimonadota;c__Fimbriimonadia;o__Fimbriimonadales;f__Fimbriimonadaceae;g__;s__	Armatimonadota	Fimbriimonadia	Fimbriimonadales	37_1
bin.354	bjsa_g	a	d__Bacteria;p__Bacteroidota;c__Bacteroidia;o__Chitinophagales;f__Chitinophagaceae;g__Puia;s__	Bacteroidota	Bacteroidia	Chitinophagales	27_1
bin.356	bjsa_g	a	d__Bacteria;p__Omnitrophota;c__Koll11;o__2-02-FULL-51-18;f__2-02-FULL-51-18;g__;s__	Omnitrophota	Koll11	2-02-FULL-51-18	114_1
bin.366	bjsa_g	a	d__Bacteria;p__Proteobacteria;c__Gammaproteobacteria;o__Burkholderiales;f__Casimicrobiaceae;g__VBCG01;s__	Proteobacteria	Gammaproteobacteria	Burkholderiales	266_1
bin.368	bjsa_g	a	d__Bacteria;p__Gemmatimonadota;c__Gemmatimonadetes;o__Gemmatimonadales;f__GWC2-71-9;g__;s__	Gemmatimonadota	Gemmatimonadetes	Gemmatimonadales	305_1
bin.37	bjsa_g	a	d__Bacteria;p__Proteobacteria;c__Gammaproteobacteria;o__Xanthomonadales;f__Rhodanobacteraceae;g__Dokdonella_A;s__	Proteobacteria	Gammaproteobacteria	Xanthomonadales	260_1
bin.370	bjsa_g	a	d__Bacteria;p__Desulfobacterota_B;c__Binatia;o__HRBIN30;f__CADEER01;g__;s__	Desulfobacterota_B	Binatia	HRBIN30	311_1
bin.374	bjsa_g	a	d__Bacteria;p__Proteobacteria;c__Alphaproteobacteria;o__Rhizobiales;f__Xanthobacteraceae;g__Pseudolabrys;s__	Proteobacteria	Alphaproteobacteria	Rhizobiales	154_1
bin.38	bjsa_g	a	d__Bacteria;p__Verrucomicrobiota;c__Verrucomicrobiae;o__Chthoniobacterales;f__UBA10450;g__;s__	Verrucomicrobiota	Verrucomicrobiae	Chthoniobacterales	129_1
bin.387	bjsa_g	a	d__Bacteria;p__Planctomycetota;c__Planctomycetes;o__Pirellulales;f__PNKZ01;g__;s__	Planctomycetota	Planctomycetes	Pirellulales	50_1
bin.389	bjsa_g	a	d__Bacteria;p__Actinobacteriota;c__Acidimicrobiia;o__IMCC26256;f__PALSA-555;g__;s__	Actinobacteriota	Acidimicrobiia	IMCC26256	92_1
bin.39	bjsa_g	a	d__Bacteria;p__Proteobacteria;c__Alphaproteobacteria;o__Micropepsales;f__Micropepsaceae;g__CAIYRG01;s__	Proteobacteria	Alphaproteobacteria	Micropepsales	182_1
bin.390	bjsa_g	a	d__Bacteria;p__Verrucomicrobiota;c__Verrucomicrobiae;o__Chthoniobacterales;f__UBA10450;g__Palsa-1392;s__	Verrucomicrobiota	Verrucomicrobiae	Chthoniobacterales	128_1
bin.41	bjsa_g	a	d__Bacteria;p__Proteobacteria;c__Alphaproteobacteria;o__Caulobacterales;f__Hyphomonadaceae;g__;s__	Proteobacteria	Alphaproteobacteria	Caulobacterales	218_1
bin.413	bjsa_g	a	d__Bacteria;p__Actinobacteriota;c__Thermoleophilia;o__Solirubrobacterales;f__Thermoleophilaceae;g__;s__	Actinobacteriota	Thermoleophilia	Solirubrobacterales	87_1
bin.419	bjsa_g	a	d__Bacteria;p__Gemmatimonadota;c__Gemmatimonadetes;o__Gemmatimonadales;f__Gemmatimonadaceae;g__;s__	Gemmatimonadota	Gemmatimonadetes	Gemmatimonadales	75_1
bin.420	bjsa_g	a	d__Bacteria;p__Proteobacteria;c__Gammaproteobacteria;o__DSM-16500;f__DSM-16500;g__Aquicella_A;s__	Proteobacteria	Gammaproteobacteria	DSM-16500	2_1
bin.426	bjsa_g	a	d__Bacteria;p__Actinobacteriota;c__Acidimicrobiia;o__IMCC26256;f__IMCC26256;g__;s__	Actinobacteriota	Acidimicrobiia	IMCC26256	93_1
bin.431	bjsa_g	a	d__Bacteria;p__Bacteroidota;c__Bacteroidia;o__Sphingobacteriales;f__Sphingobacteriaceae;g__Mucilaginibacter;s__	Bacteroidota	Bacteroidia	Sphingobacteriales	328_1
bin.49	bjsa_g	a	d__Bacteria;p__Verrucomicrobiota;c__Verrucomicrobiae;o__Chthoniobacterales;f__UBA10450;g__Palsa-1382;s__	Verrucomicrobiota	Verrucomicrobiae	Chthoniobacterales	130_1
bin.5	bjsa_g	a	d__Bacteria;p__Planctomycetota;c__Phycisphaerae;o__UBA1161;f__UBA1161;g__;s__	Planctomycetota	Phycisphaerae	UBA1161	308_1
bin.55	bjsa_g	a	d__Bacteria;p__Chloroflexota;c__UBA6077;o__UBA6077;f__CF-72;g__CF-72;s__	Chloroflexota	UBA6077	UBA6077	366_1
bin.58	bjsa_g	a	d__Bacteria;p__Gemmatimonadota;c__Gemmatimonadetes;o__Gemmatimonadales;f__GWC2-71-9;g__Palsa-1233;s__	Gemmatimonadota	Gemmatimonadetes	Gemmatimonadales	62_1
bin.59	bjsa_g	a	d__Bacteria;p__Verrucomicrobiota;c__Verrucomicrobiae;o__Chthoniobacterales;f__UBA10450;g__AV80;s__	Verrucomicrobiota	Verrucomicrobiae	Chthoniobacterales	122_1
bin.67	bjsa_g	a	d__Bacteria;p__Actinobacteriota;c__Thermoleophilia;o__Solirubrobacterales;f__70-9;g__;s__	Actinobacteriota	Thermoleophilia	Solirubrobacterales	84_1
bin.69	bjsa_g	a	d__Bacteria;p__Acidobacteriota;c__Acidobacteriae;o__Acidobacteriales;f__Koribacteraceae;g__QIAJ01;s__	Acidobacteriota	Acidobacteriae	Acidobacteriales	381_1
bin.70	bjsa_g	a	d__Bacteria;p__Planctomycetota;c__Planctomycetes;o__Pirellulales;f__Ga0077529;g__;s__	Planctomycetota	Planctomycetes	Pirellulales	333_1
bin.71	bjsa_g	a	d__Bacteria;p__Acidobacteriota;c__Thermoanaerobaculia;o__UBA5066;f__Gp7-AA6;g__;s__	Acidobacteriota	Thermoanaerobaculia	UBA5066	144_1
bin.72	bjsa_g	a	d__Bacteria;p__Acidobacteriota;c__Thermoanaerobaculia;o__Gp7-AA8;f__Gp7-AA8;g__;s__	Acidobacteriota	Thermoanaerobaculia	Gp7-AA8	99_1
bin.73	bjsa_g	a	d__Bacteria;p__Verrucomicrobiota;c__Verrucomicrobiae;o__Chthoniobacterales;f__UBA10450;g__;s__	Verrucomicrobiota	Verrucomicrobiae	Chthoniobacterales	125_1
bin.80	bjsa_g	a	d__Bacteria;p__Acidobacteriota;c__Acidobacteriae;o__Acidobacteriales;f__Koribacteraceae;g__Sulfotelmatobacter;s__	Acidobacteriota	Acidobacteriae	Acidobacteriales	384_1
bin.9	bjsa_g	a	d__Bacteria;p__Proteobacteria;c__Gammaproteobacteria;o__Steroidobacterales;f__Steroidobacteraceae;g__CADEED01;s__	Proteobacteria	Gammaproteobacteria	Steroidobacterales	140_1
bin.96	bjsa_g	a	d__Bacteria;p__Proteobacteria;c__Gammaproteobacteria;o__Xanthomonadales;f__Rhodanobacteraceae;g__;s__	Proteobacteria	Gammaproteobacteria	Xanthomonadales	264_1
bin.99	bjsa_g	a	d__Bacteria;p__Gemmatimonadota;c__Gemmatimonadetes;o__Gemmatimonadales;f__GWC2-71-9;g__;s__	Gemmatimonadota	Gemmatimonadetes	Gemmatimonadales	303_1
bin.102	bjsa_m	b	d__Bacteria;p__Verrucomicrobiota;c__Verrucomicrobiae;o__Pedosphaerales;f__Palsa-1400;g__;s__	Verrucomicrobiota	Verrucomicrobiae	Pedosphaerales	134_1
bin.104	bjsa_m	b	d__Bacteria;p__Proteobacteria;c__Gammaproteobacteria;o__Burkholderiales;f__SHXO01;g__;s__	Proteobacteria	Gammaproteobacteria	Burkholderiales	231_1
bin.107	bjsa_m	b	d__Bacteria;p__Armatimonadota;c__Fimbriimonadia;o__Fimbriimonadales;f__Fimbriimonadaceae;g__;s__	Armatimonadota	Fimbriimonadia	Fimbriimonadales	38_1
bin.11	bjsa_m	b	d__Bacteria;p__Proteobacteria;c__Alphaproteobacteria;o__Rhizobiales;f__Xanthobacteraceae;g__Pseudolabrys;s__	Proteobacteria	Alphaproteobacteria	Rhizobiales	157_1
bin.127	bjsa_m	b	d__Bacteria;p__Acidobacteriota;c__Blastocatellia;o__Pyrinomonadales;f__Pyrinomonadaceae;g__OLB17;s__	Acidobacteriota	Blastocatellia	Pyrinomonadales	379_1
bin.130	bjsa_m	b	d__Bacteria;p__Bacteroidota;c__Bacteroidia;o__Chitinophagales;f__Chitinophagaceae;g__UTBCD1;s__	Bacteroidota	Bacteroidia	Chitinophagales	31_1
bin.135	bjsa_m	b	d__Bacteria;p__Proteobacteria;c__Gammaproteobacteria;o__Xanthomonadales;f__Ahniellaceae;g__;s__	Proteobacteria	Gammaproteobacteria	Xanthomonadales	262_1
bin.137	bjsa_m	b	d__Bacteria;p__Proteobacteria;c__Gammaproteobacteria;o__Burkholderiales;f__SHXO01;g__;s__	Proteobacteria	Gammaproteobacteria	Burkholderiales	232_1
bin.14	bjsa_m	b	d__Bacteria;p__Omnitrophota;c__Omnitrophia;o__Omnitrophales;f__GWA2-52-8;g__;s__	Omnitrophota	Omnitrophia	Omnitrophales	115_1
bin.141	bjsa_m	b	d__Bacteria;p__Verrucomicrobiota;c__Verrucomicrobiae;o__Pedosphaerales;f__UBA3939;g__BOG-1460;s__	Verrucomicrobiota	Verrucomicrobiae	Pedosphaerales	119_1
bin.143	bjsa_m	b	d__Bacteria;p__Acidobacteriota;c__Acidobacteriae;o__Bryobacterales;f__Bryobacteraceae;g__Solibacter;s__	Acidobacteriota	Acidobacteriae	Bryobacterales	294_1
bin.149	bjsa_m	b	d__Bacteria;p__Proteobacteria;c__Gammaproteobacteria;o__Xanthomonadales;f__Rhodanobacteraceae;g__;s__	Proteobacteria	Gammaproteobacteria	Xanthomonadales	257_1
bin.150	bjsa_m	b	d__Bacteria;p__Myxococcota;c__Polyangia;o__Polyangiales;f__Polyangiaceae;g__;s__	Myxococcota	Polyangia	Polyangiales	269_1
bin.158	bjsa_m	b	d__Bacteria;p__Actinobacteriota;c__Actinomycetia;o__Mycobacteriales;f__Pseudonocardiaceae;g__Amycolatopsis;s__Amycolatopsis sulphurea	Actinobacteriota	Actinomycetia	Mycobacteriales	316_1
bin.160	bjsa_m	b	d__Bacteria;p__Verrucomicrobiota;c__Verrucomicrobiae;o__Chthoniobacterales;f__Terrimicrobiaceae;g__;s__	Verrucomicrobiota	Verrucomicrobiae	Chthoniobacterales	117_1
bin.163	bjsa_m	b	d__Bacteria;p__Bacteroidota;c__Bacteroidia;o__Chitinophagales;f__Chitinophagaceae;g__Palsa-955;s__	Bacteroidota	Bacteroidia	Chitinophagales	14_1
bin.167	bjsa_m	b	d__Bacteria;p__Proteobacteria;c__Alphaproteobacteria;o__ATCC43930;f__Stellaceae;g__;s__	Proteobacteria	Alphaproteobacteria	ATCC43930	164_1
bin.171	bjsa_m	b	d__Bacteria;p__Bacteroidota;c__Bacteroidia;o__Chitinophagales;f__Chitinophagaceae;g__;s__	Bacteroidota	Bacteroidia	Chitinophagales	34_1
bin.172	bjsa_m	b	d__Bacteria;p__Acidobacteriota;c__Acidobacteriae;o__Acidobacteriales;f__Koribacteraceae;g__;s__	Acidobacteriota	Acidobacteriae	Acidobacteriales	238_1
bin.174	bjsa_m	b	d__Bacteria;p__Verrucomicrobiota;c__Verrucomicrobiae;o__Verrucomicrobiales;f__Verrucomicrobiaceae;g__Prosthecobacter;s__	Verrucomicrobiota	Verrucomicrobiae	Verrucomicrobiales	180_1
bin.176	bjsa_m	b	d__Bacteria;p__Bdellovibrionota;c__Bdellovibrionia;o__Bdellovibrionales;f__Bdellovibrionaceae;g__;s__	Bdellovibrionota	Bdellovibrionia	Bdellovibrionales	42_1
bin.178	bjsa_m	b	d__Bacteria;p__Bacteroidota;c__Bacteroidia;o__Chitinophagales;f__Chitinophagaceae;g__Puia;s__	Bacteroidota	Bacteroidia	Chitinophagales	21_1
bin.189	bjsa_m	b	d__Bacteria;p__Planctomycetota;c__Planctomycetes;o__Planctomycetales;f__;g__;s__	Planctomycetota	Planctomycetes	Planctomycetales	322_1
bin.192	bjsa_m	b	d__Bacteria;p__Proteobacteria;c__Alphaproteobacteria;o__Rhizobiales;f__Xanthobacteraceae;g__BOG-931;s__	Proteobacteria	Alphaproteobacteria	Rhizobiales	204_1
bin.194	bjsa_m	b	d__Bacteria;p__Proteobacteria;c__Alphaproteobacteria;o__Sphingomonadales;f__Sphingomonadaceae;g__Allosphingosinicella;s__	Proteobacteria	Alphaproteobacteria	Sphingomonadales	175_1
bin.2	bjsa_m	b	d__Bacteria;p__Proteobacteria;c__Alphaproteobacteria;o__Rhizobiales;f__Devosiaceae;g__Devosia_A;s__	Proteobacteria	Alphaproteobacteria	Rhizobiales	150_1
bin.20	bjsa_m	b	d__Bacteria;p__Acidobacteriota;c__Acidobacteriae;o__Bryobacterales;f__Bryobacteraceae;g__;s__	Acidobacteriota	Acidobacteriae	Bryobacterales	297_1
bin.203	bjsa_m	b	d__Bacteria;p__Actinobacteriota;c__Actinomycetia;o__Mycobacteriales;f__SCTD01;g__;s__	Actinobacteriota	Actinomycetia	Mycobacteriales	90_1
bin.209	bjsa_m	b	d__Bacteria;p__Proteobacteria;c__Alphaproteobacteria;o__ATCC43930;f__Stellaceae;g__AP-15;s__	Proteobacteria	Alphaproteobacteria	ATCC43930	159_1
bin.216	bjsa_m	b	d__Bacteria;p__Bacteroidota;c__Bacteroidia;o__Cytophagales;f__Cyclobacteriaceae;g__;s__	Bacteroidota	Bacteroidia	Cytophagales	8_1
bin.218	bjsa_m	b	d__Bacteria;p__Chloroflexota;c__Chloroflexia;o__Thermomicrobiales;f__;g__;s__	Chloroflexota	Chloroflexia	Thermomicrobiales	225_1
bin.22	bjsa_m	b	d__Bacteria;p__Proteobacteria;c__Alphaproteobacteria;o__Micropepsales;f__Micropepsaceae;g__Rhizomicrobium;s__	Proteobacteria	Alphaproteobacteria	Micropepsales	197_1
bin.225	bjsa_m	b	d__Bacteria;p__Planctomycetota;c__Planctomycetes;o__Pirellulales;f__Pirellulaceae;g__Pirellula;s__	Planctomycetota	Planctomycetes	Pirellulales	332_1
bin.233	bjsa_m	b	d__Bacteria;p__Myxococcota;c__Polyangia;o__Polyangiales;f__Polyangiaceae;g__;s__	Myxococcota	Polyangia	Polyangiales	270_1
bin.234	bjsa_m	b	d__Bacteria;p__Verrucomicrobiota;c__Verrucomicrobiae;o__Chthoniobacterales;f__UBA10450;g__AV40;s__	Verrucomicrobiota	Verrucomicrobiae	Chthoniobacterales	127_1
bin.237	bjsa_m	b	d__Bacteria;p__Bacteroidota;c__Bacteroidia;o__NS11-12g;f__UBA955;g__;s__	Bacteroidota	Bacteroidia	NS11-12g	7_1
bin.242	bjsa_m	b	d__Bacteria;p__Verrucomicrobiota;c__Verrucomicrobiae;o__Chthoniobacterales;f__UBA10450;g__;s__	Verrucomicrobiota	Verrucomicrobiae	Chthoniobacterales	126_1
bin.243	bjsa_m	b	d__Bacteria;p__Planctomycetota;c__Planctomycetes;o__Planctomycetales;f__UBA10511;g__SIAF01;s__	Planctomycetota	Planctomycetes	Planctomycetales	254_1
bin.244	bjsa_m	b	d__Bacteria;p__Bdellovibrionota;c__Bdellovibrionia_A;o__UBA1018;f__UBA1018;g__JACMQW01;s__	Bdellovibrionota	Bdellovibrionia_A	UBA1018	224_1
bin.247	bjsa_m	b	d__Bacteria;p__Verrucomicrobiota;c__Verrucomicrobiae;o__Pedosphaerales;f__UBA8199;g__PSRM01;s__	Verrucomicrobiota	Verrucomicrobiae	Pedosphaerales	253_1
bin.251	bjsa_m	b	d__Bacteria;p__Proteobacteria;c__Alphaproteobacteria;o__Micropepsales;f__Micropepsaceae;g__Rhizomicrobium;s__	Proteobacteria	Alphaproteobacteria	Micropepsales	200_1
bin.254	bjsa_m	b	d__Bacteria;p__Desulfobacterota_B;c__Binatia;o__HRBIN30;f__;g__;s__	Desulfobacterota_B	Binatia	HRBIN30	329_1
bin.262	bjsa_m	b	d__Bacteria;p__Proteobacteria;c__Alphaproteobacteria;o__Micropepsales;f__Micropepsaceae;g__Rhizomicrobium;s__	Proteobacteria	Alphaproteobacteria	Micropepsales	184_1
bin.264	bjsa_m	b	d__Bacteria;p__Proteobacteria;c__Gammaproteobacteria;o__DSM-16500;f__DSM-16500;g__;s__	Proteobacteria	Gammaproteobacteria	DSM-16500	1_1
bin.267	bjsa_m	b	d__Bacteria;p__Proteobacteria;c__Alphaproteobacteria;o__Sphingomonadales;f__Sphingomonadaceae;g__Allosphingosinicella;s__	Proteobacteria	Alphaproteobacteria	Sphingomonadales	177_1
bin.27	bjsa_m	b	d__Bacteria;p__Acidobacteriota;c__Acidobacteriae;o__Bryobacterales;f__Bryobacteraceae;g__;s__	Acidobacteriota	Acidobacteriae	Bryobacterales	315_1
bin.270	bjsa_m	b	d__Bacteria;p__Armatimonadota;c__Abditibacteria;o__Abditibacteriales;f__Abditibacteriaceae;g__Abditibacterium;s__	Armatimonadota	Abditibacteria	Abditibacteriales	49_1
bin.277	bjsa_m	b	d__Bacteria;p__Bacteroidota;c__Bacteroidia;o__Sphingobacteriales;f__Sphingobacteriaceae;g__Mucilaginibacter;s__	Bacteroidota	Bacteroidia	Sphingobacteriales	109_1
bin.280	bjsa_m	b	d__Bacteria;p__Proteobacteria;c__Gammaproteobacteria;o__Pseudomonadales;f__Spongiibacteraceae;g__;s__	Proteobacteria	Gammaproteobacteria	Pseudomonadales	19_1
bin.285	bjsa_m	b	d__Bacteria;p__Proteobacteria;c__Alphaproteobacteria;o__Micropepsales;f__Micropepsaceae;g__Rhizomicrobium;s__	Proteobacteria	Alphaproteobacteria	Micropepsales	198_1
bin.288	bjsa_m	b	d__Bacteria;p__Verrucomicrobiota;c__Verrucomicrobiae;o__Pedosphaerales;f__UBA11358;g__;s__	Verrucomicrobiota	Verrucomicrobiae	Pedosphaerales	334_1
bin.289	bjsa_m	b	d__Bacteria;p__Myxococcota;c__Polyangia;o__Polyangiales;f__Polyangiaceae;g__;s__	Myxococcota	Polyangia	Polyangiales	272_1
bin.292	bjsa_m	b	d__Bacteria;p__Acidobacteriota;c__Vicinamibacteria;o__Vicinamibacterales;f__UBA2999;g__Gp6-AA40;s__	Acidobacteriota	Vicinamibacteria	Vicinamibacterales	245_1
bin.3	bjsa_m	b	d__Bacteria;p__Acidobacteriota;c__Thermoanaerobaculia;o__Gp7-AA8;f__Gp7-AA8;g__;s__	Acidobacteriota	Thermoanaerobaculia	Gp7-AA8	104_1
bin.300	bjsa_m	b	d__Bacteria;p__Planctomycetota;c__Planctomycetes;o__Pirellulales;f__Pirellulaceae;g__SXOA01;s__	Planctomycetota	Planctomycetes	Pirellulales	330_1
bin.306	bjsa_m	b	d__Bacteria;p__Gemmatimonadota;c__Gemmatimonadetes;o__Gemmatimonadales;f__GWC2-71-9;g__Palsa-1233;s__	Gemmatimonadota	Gemmatimonadetes	Gemmatimonadales	63_1
bin.307	bjsa_m	b	d__Bacteria;p__Verrucomicrobiota;c__Verrucomicrobiae;o__Chthoniobacterales;f__UBA10450;g__;s__	Verrucomicrobiota	Verrucomicrobiae	Chthoniobacterales	131_1
bin.309	bjsa_m	b	d__Bacteria;p__Bdellovibrionota;c__Bdellovibrionia;o__Bdellovibrionales;f__Bdellovibrionaceae;g__;s__	Bdellovibrionota	Bdellovibrionia	Bdellovibrionales	41_1
bin.310	bjsa_m	b	d__Bacteria;p__Bacteroidota;c__Bacteroidia;o__AKYH767;f__B-17BO;g__;s__	Bacteroidota	Bacteroidia	AKYH767	4_1
bin.312	bjsa_m	b	d__Bacteria;p__Bacteroidota;c__Bacteroidia;o__Chitinophagales;f__Chitinophagaceae;g__Flavisolibacter;s__	Bacteroidota	Bacteroidia	Chitinophagales	17_1
bin.324	bjsa_m	b	d__Bacteria;p__Proteobacteria;c__Alphaproteobacteria;o__Rickettsiales;f__SXRF01;g__JABDCD01;s__	Proteobacteria	Alphaproteobacteria	Rickettsiales	192_1
bin.340	bjsa_m	b	d__Bacteria;p__Actinobacteriota;c__Actinomycetia;o__Streptosporangiales;f__Streptosporangiaceae;g__;s__	Actinobacteriota	Actinomycetia	Streptosporangiales	76_1
bin.343	bjsa_m	b	d__Bacteria;p__Bacteroidota;c__Kapabacteria;o__Palsa-1295;f__Palsa-1295;g__PALSA-1295;s__	Bacteroidota	Kapabacteria	Palsa-1295	113_1
bin.349	bjsa_m	b	d__Bacteria;p__Actinobacteriota;c__Actinomycetia;o__Mycobacteriales;f__Frankiaceae;g__;s__	Actinobacteriota	Actinomycetia	Mycobacteriales	78_1
bin.351	bjsa_m	b	d__Bacteria;p__Acidobacteriota;c__Thermoanaerobaculia;o__Gp7-AA8;f__Gp7-AA8;g__QHVT01;s__	Acidobacteriota	Thermoanaerobaculia	Gp7-AA8	102_1
bin.352	bjsa_m	b	d__Bacteria;p__Proteobacteria;c__Alphaproteobacteria;o__Caulobacterales;f__Caulobacteraceae;g__;s__	Proteobacteria	Alphaproteobacteria	Caulobacterales	194_1
bin.361	bjsa_m	b	d__Bacteria;p__Proteobacteria;c__Alphaproteobacteria;o__Micropepsales;f__Micropepsaceae;g__Rhizomicrobium;s__	Proteobacteria	Alphaproteobacteria	Micropepsales	185_1
bin.362	bjsa_m	b	d__Bacteria;p__Fibrobacterota;c__Fibrobacteria;o__UBA11236;f__UBA11236;g__;s__	Fibrobacterota	Fibrobacteria	UBA11236	43_1
bin.363	bjsa_m	b	d__Bacteria;p__Gemmatimonadota;c__Gemmatimonadetes;o__Gemmatimonadales;f__Gemmatimonadaceae;g__AG2;s__	Gemmatimonadota	Gemmatimonadetes	Gemmatimonadales	279_1
bin.364	bjsa_m	b	d__Bacteria;p__Acidobacteriota;c__Acidobacteriae;o__Bryobacterales;f__Bryobacteraceae;g__PALSA-129;s__	Acidobacteriota	Acidobacteriae	Bryobacterales	295_1
bin.370	bjsa_m	b	d__Bacteria;p__Actinobacteriota;c__Acidimicrobiia;o__Acidimicrobiales;f__Ilumatobacteraceae;g__;s__	Actinobacteriota	Acidimicrobiia	Acidimicrobiales	96_1
bin.374	bjsa_m	b	d__Bacteria;p__Proteobacteria;c__Alphaproteobacteria;o__Sphingomonadales;f__Sphingomonadaceae;g__Sphingomicrobium;s__	Proteobacteria	Alphaproteobacteria	Sphingomonadales	189_1
bin.378	bjsa_m	b	d__Bacteria;p__Verrucomicrobiota;c__Verrucomicrobiae;o__Opitutales;f__Opitutaceae;g__ER46;s__	Verrucomicrobiota	Verrucomicrobiae	Opitutales	136_1
bin.382	bjsa_m	b	d__Bacteria;p__Acidobacteriota;c__Blastocatellia;o__Pyrinomonadales;f__Pyrinomonadaceae;g__UBA11740;s__	Acidobacteriota	Blastocatellia	Pyrinomonadales	349_1
bin.385	bjsa_m	b	d__Bacteria;p__Proteobacteria;c__Gammaproteobacteria;o__Pseudomonadales;f__Pseudomonadaceae;g__Pseudomonas_E;s__Pseudomonas_E moorei	Proteobacteria	Gammaproteobacteria	Pseudomonadales	71_1
bin.394	bjsa_m	b	d__Bacteria;p__Bacteroidota;c__Bacteroidia;o__AKYH767;f__B-17BO;g__;s__	Bacteroidota	Bacteroidia	AKYH767	3_1
bin.41	bjsa_m	b	d__Bacteria;p__Proteobacteria;c__Gammaproteobacteria;o__Pseudomonadales;f__Pseudomonadaceae;g__Pseudomonas_E;s__	Proteobacteria	Gammaproteobacteria	Pseudomonadales	72_1
bin.416	bjsa_m	b	d__Bacteria;p__Bacteroidota;c__Bacteroidia;o__Chitinophagales;f__;g__;s__	Bacteroidota	Bacteroidia	Chitinophagales	20_1
bin.42	bjsa_m	b	d__Bacteria;p__Planctomycetota;c__Phycisphaerae;o__Phycisphaerales;f__SM1A02;g__;s__	Planctomycetota	Phycisphaerae	Phycisphaerales	286_1
bin.49	bjsa_m	b	d__Bacteria;p__Fibrobacterota;c__Fibrobacteria;o__UBA11236;f__UBA11236;g__;s__	Fibrobacterota	Fibrobacteria	UBA11236	44_1
bin.61	bjsa_m	b	d__Bacteria;p__Proteobacteria;c__Alphaproteobacteria;o__Acetobacterales;f__Acetobacteraceae;g__Acidocella;s__	Proteobacteria	Alphaproteobacteria	Acetobacterales	191_1
bin.67	bjsa_m	b	d__Bacteria;p__Acidobacteriota;c__Blastocatellia;o__UBA7656;f__UBA7656;g__UBA7656;s__	Acidobacteriota	Blastocatellia	UBA7656	52_1
bin.70	bjsa_m	b	d__Bacteria;p__Bacteroidota;c__Bacteroidia;o__Chitinophagales;f__UBA10324;g__;s__	Bacteroidota	Bacteroidia	Chitinophagales	66_1
bin.72	bjsa_m	b	d__Bacteria;p__Actinobacteriota;c__Actinomycetia;o__Propionibacteriales;f__Nocardioidaceae;g__Nocardioides;s__	Actinobacteriota	Actinomycetia	Propionibacteriales	91_1
bin.77	bjsa_m	b	d__Bacteria;p__Actinobacteriota;c__Thermoleophilia;o__Gaiellales;f__Gaiellaceae;g__Palsa-739;s__	Actinobacteriota	Thermoleophilia	Gaiellales	241_1
bin.79	bjsa_m	b	d__Bacteria;p__Bacteroidota;c__Bacteroidia;o__Chitinophagales;f__Chitinophagaceae;g__Puia;s__	Bacteroidota	Bacteroidia	Chitinophagales	12_1
bin.82	bjsa_m	b	d__Bacteria;p__Chlamydiota;c__Chlamydiia;o__Chlamydiales;f__SM23-39;g__2-02-FULL-45-22_A;s__	Chlamydiota	Chlamydiia	Chlamydiales	389_1
bin.86	bjsa_m	b	d__Bacteria;p__Planctomycetota;c__Phycisphaerae;o__UBA1161;f__UBA1161;g__JACMJD01;s__	Planctomycetota	Phycisphaerae	UBA1161	309_1
bin.90	bjsa_m	b	d__Bacteria;p__Acidobacteriota;c__Blastocatellia;o__Pyrinomonadales;f__Pyrinomonadaceae;g__JACMLC01;s__	Acidobacteriota	Blastocatellia	Pyrinomonadales	356_1
bin.91	bjsa_m	b	d__Bacteria;p__Elusimicrobiota;c__Elusimicrobia;o__UBA1565;f__UBA9628;g__PALSA-1176;s__	Elusimicrobiota	Elusimicrobia	UBA1565	336_1
bin.97	bjsa_m	b	d__Bacteria;p__Proteobacteria;c__Alphaproteobacteria;o__Caulobacterales;f__Hyphomonadaceae;g__;s__	Proteobacteria	Alphaproteobacteria	Caulobacterales	219_1
bin.10	ntc_g	c	d__Bacteria;p__Verrucomicrobiota;c__Verrucomicrobiae;o__Pedosphaerales;f__UBA11358;g__;s__	Verrucomicrobiota	Verrucomicrobiae	Pedosphaerales	120_1
bin.103	ntc_g	c	d__Bacteria;p__Acidobacteriota;c__Acidobacteriae;o__Bryobacterales;f__Bryobacteraceae;g__Solibacter;s__	Acidobacteriota	Acidobacteriae	Bryobacterales	293_1
bin.105	ntc_g	c	d__Bacteria;p__Proteobacteria;c__Gammaproteobacteria;o__Burkholderiales;f__Rhodocyclaceae;g__;s__	Proteobacteria	Gammaproteobacteria	Burkholderiales	141_1
bin.110	ntc_g	c	d__Bacteria;p__Acidobacteriota;c__Acidobacteriae;o__Acidobacteriales;f__Gp1-AA117;g__Gp1-AA17;s__	Acidobacteriota	Acidobacteriae	Acidobacteriales	346_1
bin.111	ntc_g	c	d__Bacteria;p__Proteobacteria;c__Alphaproteobacteria;o__Rhizobiales;f__Aestuariivirgaceae;g__CABJBCQ01;s__	Proteobacteria	Alphaproteobacteria	Rhizobiales	179_1
bin.121	ntc_g	c	d__Bacteria;p__Acidobacteriota;c__Vicinamibacteria;o__Fen-336;f__Fen-336;g__;s__	Acidobacteriota	Vicinamibacteria	Fen-336	324_1
bin.133	ntc_g	c	d__Bacteria;p__Bacteroidota;c__Bacteroidia;o__Chitinophagales;f__Chitinophagaceae;g__Flavisolibacter;s__	Bacteroidota	Bacteroidia	Chitinophagales	33_2
bin.142	ntc_g	c	d__Bacteria;p__Verrucomicrobiota;c__Verrucomicrobiae;o__Chthoniobacterales;f__UBA10450;g__AV80;s__	Verrucomicrobiota	Verrucomicrobiae	Chthoniobacterales	123_1
bin.149	ntc_g	c	d__Bacteria;p__Actinobacteriota;c__Thermoleophilia;o__Solirubrobacterales;f__Solirubrobacteraceae;g__Palsa-744;s__	Actinobacteriota	Thermoleophilia	Solirubrobacterales	244_1
bin.159	ntc_g	c	d__Bacteria;p__Acidobacteriota;c__Thermoanaerobaculia;o__UBA5704;f__UBA5704;g__;s__	Acidobacteriota	Thermoanaerobaculia	UBA5704	228_1
bin.171	ntc_g	c	d__Bacteria;p__Eremiobacterota;c__Eremiobacteria;o__Baltobacterales;f__Baltobacteraceae;g__Tumulicola;s__	Eremiobacterota	Eremiobacteria	Baltobacterales	247_1
bin.173	ntc_g	c	d__Bacteria;p__Actinobacteriota;c__Thermoleophilia;o__Solirubrobacterales;f__70-9;g__;s__	Actinobacteriota	Thermoleophilia	Solirubrobacterales	82_1
bin.184	ntc_g	c	d__Bacteria;p__Acidobacteriota;c__Acidobacteriae;o__Acidobacteriales;f__Koribacteraceae;g__Gp1-AA145;s__	Acidobacteriota	Acidobacteriae	Acidobacteriales	383_1
bin.197	ntc_g	c	d__Bacteria;p__Gemmatimonadota;c__Gemmatimonadetes;o__Gemmatimonadales;f__GWC2-71-9;g__AG25;s__	Gemmatimonadota	Gemmatimonadetes	Gemmatimonadales	338_1
bin.2	ntc_g	c	d__Bacteria;p__Proteobacteria;c__Gammaproteobacteria;o__Burkholderiales;f__SHXO01;g__;s__	Proteobacteria	Gammaproteobacteria	Burkholderiales	230_1
bin.208	ntc_g	c	d__Bacteria;p__Bacteroidota;c__Bacteroidia;o__Chitinophagales;f__Chitinophagaceae;g__Puia;s__	Bacteroidota	Bacteroidia	Chitinophagales	16_1
bin.213	ntc_g	c	d__Bacteria;p__Proteobacteria;c__Alphaproteobacteria;o__Sphingomonadales;f__Sphingomonadaceae;g__Sphingobium;s__	Proteobacteria	Alphaproteobacteria	Sphingomonadales	178_1
bin.217	ntc_g	c	d__Bacteria;p__Acidobacteriota;c__Blastocatellia;o__Pyrinomonadales;f__Pyrinomonadaceae;g__UBA11740;s__	Acidobacteriota	Blastocatellia	Pyrinomonadales	350_1
bin.22	ntc_g	c	d__Bacteria;p__Acidobacteriota;c__Acidobacteriae;o__UBA7541;f__UBA7541;g__;s__	Acidobacteriota	Acidobacteriae	UBA7541	377_2
bin.222	ntc_g	c	d__Bacteria;p__Proteobacteria;c__Alphaproteobacteria;o__ATCC43930;f__Stellaceae;g__AP-15;s__	Proteobacteria	Alphaproteobacteria	ATCC43930	160_1
bin.246	ntc_g	c	d__Bacteria;p__Proteobacteria;c__Alphaproteobacteria;o__Sphingomonadales;f__Sphingomonadaceae;g__Novosphingobium;s__	Proteobacteria	Alphaproteobacteria	Sphingomonadales	168_1
bin.249	ntc_g	c	d__Bacteria;p__Proteobacteria;c__Gammaproteobacteria;o__Xanthomonadales;f__Rhodanobacteraceae;g__Dyella_A;s__	Proteobacteria	Gammaproteobacteria	Xanthomonadales	236_1
bin.250	ntc_g	c	d__Bacteria;p__Acidobacteriota;c__Blastocatellia;o__Pyrinomonadales;f__Pyrinomonadaceae;g__OLB17;s__	Acidobacteriota	Blastocatellia	Pyrinomonadales	337_1
bin.252	ntc_g	c	d__Bacteria;p__Spirochaetota;c__Leptospirae;o__Leptospirales;f__Leptospiraceae;g__UBA2033;s__	Spirochaetota	Leptospirae	Leptospirales	10_1
bin.256	ntc_g	c	d__Bacteria;p__Acidobacteriota;c__Thermoanaerobaculia;o__UBA5704;f__UBA5704;g__UBA5704;s__	Acidobacteriota	Thermoanaerobaculia	UBA5704	227_1
bin.261	ntc_g	c	d__Bacteria;p__Acidobacteriota;c__Acidobacteriae;o__Acidobacteriales;f__Koribacteraceae;g__;s__	Acidobacteriota	Acidobacteriae	Acidobacteriales	382_1
bin.262	ntc_g	c	d__Bacteria;p__Proteobacteria;c__Gammaproteobacteria;o__Xanthomonadales;f__Rhodanobacteraceae;g__66-474;s__	Proteobacteria	Gammaproteobacteria	Xanthomonadales	256_1
bin.269	ntc_g	c	d__Bacteria;p__Gemmatimonadota;c__Gemmatimonadetes;o__Gemmatimonadales;f__GWC2-71-9;g__20CM-2-65-7;s__	Gemmatimonadota	Gemmatimonadetes	Gemmatimonadales	299_1
bin.27	ntc_g	c	d__Bacteria;p__Verrucomicrobiota;c__Verrucomicrobiae;o__Pedosphaerales;f__UBA11358;g__;s__	Verrucomicrobiota	Verrucomicrobiae	Pedosphaerales	148_1
bin.276	ntc_g	c	d__Bacteria;p__Acidobacteriota;c__Acidobacteriae;o__UBA7541;f__UBA7541;g__UBA7541;s__	Acidobacteriota	Acidobacteriae	UBA7541	373_1
bin.28	ntc_g	c	d__Bacteria;p__Gemmatimonadota;c__Gemmatimonadetes;o__Gemmatimonadales;f__GWC2-71-9;g__Palsa-1233;s__	Gemmatimonadota	Gemmatimonadetes	Gemmatimonadales	61_1
bin.280	ntc_g	c	d__Bacteria;p__Proteobacteria;c__Alphaproteobacteria;o__Micropepsales;f__Micropepsaceae;g__;s__	Proteobacteria	Alphaproteobacteria	Micropepsales	183_1
bin.287	ntc_g	c	d__Bacteria;p__Proteobacteria;c__Alphaproteobacteria;o__Rhizobiales;f__Xanthobacteraceae;g__Pseudolabrys;s__	Proteobacteria	Alphaproteobacteria	Rhizobiales	156_1
bin.288	ntc_g	c	d__Bacteria;p__Armatimonadota;c__Fimbriimonadia;o__Fimbriimonadales;f__Fimbriimonadaceae;g__;s__	Armatimonadota	Fimbriimonadia	Fimbriimonadales	378_1
bin.289	ntc_g	c	d__Bacteria;p__Gemmatimonadota;c__Gemmatimonadetes;o__Gemmatimonadales;f__GWC2-71-9;g__AG25;s__	Gemmatimonadota	Gemmatimonadetes	Gemmatimonadales	237_1
bin.298	ntc_g	c	d__Bacteria;p__Proteobacteria;c__Gammaproteobacteria;o__Burkholderiales;f__Burkholderiaceae;g__Rhodoferax;s__	Proteobacteria	Gammaproteobacteria	Burkholderiales	210_1
bin.31	ntc_g	c	d__Bacteria;p__Bacteroidota;c__Bacteroidia;o__Chitinophagales;f__Chitinophagaceae;g__UTBCD1;s__	Bacteroidota	Bacteroidia	Chitinophagales	29_1
bin.34	ntc_g	c	d__Bacteria;p__Acidobacteriota;c__Vicinamibacteria;o__Fen-336;f__Fen-336;g__AA32;s__	Acidobacteriota	Vicinamibacteria	Fen-336	229_1
bin.44	ntc_g	c	d__Bacteria;p__Acidobacteriota;c__Acidobacteriae;o__UBA7541;f__UBA7541;g__Palsa-147;s__	Acidobacteriota	Acidobacteriae	UBA7541	344_1
bin.58	ntc_g	c	d__Bacteria;p__Proteobacteria;c__Alphaproteobacteria;o__Micropepsales;f__Micropepsaceae;g__CAIYRG01;s__	Proteobacteria	Alphaproteobacteria	Micropepsales	186_1
bin.61	ntc_g	c	d__Bacteria;p__Gemmatimonadota;c__Gemmatimonadetes;o__Gemmatimonadales;f__Gemmatimonadaceae;g__AG2;s__	Gemmatimonadota	Gemmatimonadetes	Gemmatimonadales	278_1
bin.8	ntc_g	c	d__Bacteria;p__Proteobacteria;c__Alphaproteobacteria;o__WRAU01;f__;g__;s__	Proteobacteria	Alphaproteobacteria	WRAU01	390_1
bin.80	ntc_g	c	d__Bacteria;p__Acidobacteriota;c__Thermoanaerobaculia;o__Gp7-AA8;f__Gp7-AA8;g__;s__	Acidobacteriota	Thermoanaerobaculia	Gp7-AA8	100_1
bin.87	ntc_g	c	d__Bacteria;p__Myxococcota;c__Polyangia;o__Polyangiales;f__Polyangiaceae;g__;s__	Myxococcota	Polyangia	Polyangiales	51_1
bin.9	ntc_g	c	d__Bacteria;p__Proteobacteria;c__Gammaproteobacteria;o__Burkholderiales;f__Burkholderiaceae;g__Rhodoferax;s__	Proteobacteria	Gammaproteobacteria	Burkholderiales	209_1
bin.91	ntc_g	c	d__Bacteria;p__Acidobacteriota;c__Blastocatellia;o__Pyrinomonadales;f__Pyrinomonadaceae;g__;s__	Acidobacteriota	Blastocatellia	Pyrinomonadales	351_1
bin.104	ntc_m	d	d__Bacteria;p__Actinobacteriota;c__Actinomycetia;o__Streptosporangiales;f__Streptosporangiaceae;g__Actinocorallia;s__	Actinobacteriota	Actinomycetia	Streptosporangiales	81_1
bin.107	ntc_m	d	d__Bacteria;p__Proteobacteria;c__Alphaproteobacteria;o__Sphingomonadales;f__Sphingomonadaceae;g__Novosphingobium;s__	Proteobacteria	Alphaproteobacteria	Sphingomonadales	169_1
bin.109	ntc_m	d	d__Bacteria;p__Chloroflexota;c__Ellin6529;o__QHBO01;f__QHBO01;g__CF-82;s__	Chloroflexota	Ellin6529	QHBO01	105_1
bin.118	ntc_m	d	d__Bacteria;p__Proteobacteria;c__Gammaproteobacteria;o__Coxiellales;f__Coxiellaceae;g__;s__	Proteobacteria	Gammaproteobacteria	Coxiellales	391_1
bin.127	ntc_m	d	d__Bacteria;p__Eisenbacteria;c__RBG-16-71-46;o__SZUA-252;f__SZUA-252;g__WS-9;s__	Eisenbacteria	RBG-16-71-46	SZUA-252	326_1
bin.137	ntc_m	d	d__Bacteria;p__Bacteroidota;c__Bacteroidia;o__Chitinophagales;f__Chitinophagaceae;g__Puia;s__	Bacteroidota	Bacteroidia	Chitinophagales	15_1
bin.14	ntc_m	d	d__Bacteria;p__Proteobacteria;c__Gammaproteobacteria;o__Burkholderiales;f__Burkholderiaceae;g__;s__	Proteobacteria	Gammaproteobacteria	Burkholderiales	347_1
bin.140	ntc_m	d	d__Bacteria;p__Acidobacteriota;c__Mor1;o__Mor1;f__;g__;s__	Acidobacteriota	Mor1	Mor1	291_1
bin.154	ntc_m	d	d__Bacteria;p__Acidobacteriota;c__Thermoanaerobaculia;o__Gp7-AA8;f__Gp7-AA8;g__;s__	Acidobacteriota	Thermoanaerobaculia	Gp7-AA8	98_1
bin.157	ntc_m	d	d__Bacteria;p__Proteobacteria;c__Alphaproteobacteria;o__Rhizobiales;f__Xanthobacteraceae;g__Pseudolabrys;s__	Proteobacteria	Alphaproteobacteria	Rhizobiales	155_1
bin.158	ntc_m	d	d__Bacteria;p__Acidobacteriota;c__Acidobacteriae;o__Acidobacteriales;f__Koribacteraceae;g__;s__	Acidobacteriota	Acidobacteriae	Acidobacteriales	74_1
bin.161	ntc_m	d	d__Bacteria;p__Chlamydiota;c__Chlamydiia;o__Chlamydiales;f__Rhabdochlamydiaceae;g__JABDFI01;s__	Chlamydiota	Chlamydiia	Chlamydiales	70_1
bin.162	ntc_m	d	d__Bacteria;p__Actinobacteriota;c__UBA4738;o__UBA4738;f__HRBIN12;g__;s__	Actinobacteriota	UBA4738	UBA4738	250_1
bin.164	ntc_m	d	d__Bacteria;p__Nitrospirota;c__Nitrospiria;o__Nitrospirales;f__Nitrospiraceae;g__2-02-FULL-62-14;s__	Nitrospirota	Nitrospiria	Nitrospirales	116_1
bin.167	ntc_m	d	d__Bacteria;p__Planctomycetota;c__Phycisphaerae;o__UBA1161;f__UBA1161;g__;s__	Planctomycetota	Phycisphaerae	UBA1161	47_1
bin.17	ntc_m	d	d__Bacteria;p__Acidobacteriota;c__Blastocatellia;o__Pyrinomonadales;f__Pyrinomonadaceae;g__JACVRN01;s__	Acidobacteriota	Blastocatellia	Pyrinomonadales	355_1
bin.170	ntc_m	d	d__Bacteria;p__Proteobacteria;c__Alphaproteobacteria;o__Sphingomonadales;f__Sphingomonadaceae;g__Sphingomicrobium;s__	Proteobacteria	Alphaproteobacteria	Sphingomonadales	170_1
bin.175	ntc_m	d	d__Bacteria;p__Proteobacteria;c__Alphaproteobacteria;o__Micropepsales;f__Micropepsaceae;g__CAIYRG01;s__	Proteobacteria	Alphaproteobacteria	Micropepsales	181_1
bin.187	ntc_m	d	d__Bacteria;p__Acidobacteriota;c__Blastocatellia;o__UBA7656;f__UBA7656;g__UBA7656;s__	Acidobacteriota	Blastocatellia	UBA7656	53_1
bin.194	ntc_m	d	d__Bacteria;p__Proteobacteria;c__Gammaproteobacteria;o__JABCZS01;f__JABCZS01;g__;s__	Proteobacteria	Gammaproteobacteria	JABCZS01	69_1
bin.205	ntc_m	d	d__Bacteria;p__Proteobacteria;c__Alphaproteobacteria;o__Rhizobiales;f__Aestuariivirgaceae;g__CABJBCQ01;s__	Proteobacteria	Alphaproteobacteria	Rhizobiales	251_1
bin.208	ntc_m	d	d__Bacteria;p__Gemmatimonadota;c__Gemmatimonadetes;o__Gemmatimonadales;f__GWC2-71-9;g__;s__	Gemmatimonadota	Gemmatimonadetes	Gemmatimonadales	301_1
bin.217	ntc_m	d	d__Bacteria;p__Planctomycetota;c__UBA1135;o__UBA1135;f__GCA-002686595;g__;s__	Planctomycetota	UBA1135	UBA1135	283_1
bin.23	ntc_m	d	d__Bacteria;p__Acidobacteriota;c__Acidobacteriae;o__Bryobacterales;f__Bryobacteraceae;g__Palsa-187;s__	Acidobacteriota	Acidobacteriae	Bryobacterales	369_1
bin.231	ntc_m	d	d__Bacteria;p__Actinobacteriota;c__UBA4738;o__UBA4738;f__;g__;s__	Actinobacteriota	UBA4738	UBA4738	342_1
bin.25	ntc_m	d	d__Bacteria;p__Myxococcota;c__Polyangia;o__Haliangiales;f__Haliangiaceae;g__;s__	Myxococcota	Polyangia	Haliangiales	146_1
bin.250	ntc_m	d	d__Bacteria;p__Bacteroidota;c__Bacteroidia;o__Chitinophagales;f__Chitinophagaceae;g__Chitinophaga;s__	Bacteroidota	Bacteroidia	Chitinophagales	9_1
bin.251	ntc_m	d	d__Bacteria;p__Acidobacteriota;c__Mor1;o__Mor1;f__;g__;s__	Acidobacteriota	Mor1	Mor1	290_1
bin.255	ntc_m	d	d__Bacteria;p__Omnitrophota;c__Omnitrophia;o__Omnitrophales;f__;g__;s__	Omnitrophota	Omnitrophia	Omnitrophales	255_1
bin.256	ntc_m	d	d__Bacteria;p__Verrucomicrobiota;c__Verrucomicrobiae;o__Pedosphaerales;f__SIBH01;g__;s__	Verrucomicrobiota	Verrucomicrobiae	Pedosphaerales	147_1
bin.258	ntc_m	d	d__Bacteria;p__Myxococcota;c__Polyangia;o__Polyangiales;f__Polyangiaceae;g__;s__	Myxococcota	Polyangia	Polyangiales	273_1
bin.264	ntc_m	d	d__Bacteria;p__Acidobacteriota;c__Acidobacteriae;o__Acidobacteriales;f__Gp1-AA117;g__Gp1-AA17;s__	Acidobacteriota	Acidobacteriae	Acidobacteriales	345_1
bin.27	ntc_m	d	d__Bacteria;p__Verrucomicrobiota;c__Verrucomicrobiae;o__Chthoniobacterales;f__;g__;s__	Verrucomicrobiota	Verrucomicrobiae	Chthoniobacterales	133_1
bin.273	ntc_m	d	d__Bacteria;p__Planctomycetota;c__UBA1135;o__UBA2386;f__UBA2386;g__;s__	Planctomycetota	UBA1135	UBA2386	248_1
bin.287	ntc_m	d	d__Bacteria;p__Acidobacteriota;c__Blastocatellia;o__Pyrinomonadales;f__Pyrinomonadaceae;g__JACMLC01;s__	Acidobacteriota	Blastocatellia	Pyrinomonadales	353_1
bin.288	ntc_m	d	d__Bacteria;p__Verrucomicrobiota;c__Verrucomicrobiae;o__Pedosphaerales;f__SIBH01;g__;s__	Verrucomicrobiota	Verrucomicrobiae	Pedosphaerales	118_1
bin.295	ntc_m	d	d__Bacteria;p__Proteobacteria;c__Gammaproteobacteria;o__Enterobacterales;f__DSM-103792;g__;s__	Proteobacteria	Gammaproteobacteria	Enterobacterales	56_1
bin.299	ntc_m	d	d__Bacteria;p__Planctomycetota;c__UBA1135;o__UBA1135;f__GCA-002686595;g__;s__	Planctomycetota	UBA1135	UBA1135	281_1
bin.302	ntc_m	d	d__Bacteria;p__FCPU426;c__Palsa-1180;o__Palsa-1180;f__Palsa-1180;g__PALSA-1180;s__	FCPU426	Palsa-1180	Palsa-1180	46_1
bin.303	ntc_m	d	d__Bacteria;p__Nitrospirota;c__Nitrospiria;o__Nitrospirales;f__Nitrospiraceae;g__Palsa-1315;s__	Nitrospirota	Nitrospiria	Nitrospirales	108_1
bin.318	ntc_m	d	d__Bacteria;p__Acidobacteriota;c__Vicinamibacteria;o__Vicinamibacterales;f__UBA2999;g__Gp6-AA40;s__	Acidobacteriota	Vicinamibacteria	Vicinamibacterales	246_1
bin.321	ntc_m	d	d__Bacteria;p__Acidobacteriota;c__Holophagae;o__Holophagales;f__Holophagaceae;g__;s__	Acidobacteriota	Holophagae	Holophagales	276_1
bin.322	ntc_m	d	d__Bacteria;p__Verrucomicrobiota;c__Verrucomicrobiae;o__Chthoniobacterales;f__Chthoniobacteraceae;g__VFJQ01;s__	Verrucomicrobiota	Verrucomicrobiae	Chthoniobacterales	149_1
bin.327	ntc_m	d	d__Bacteria;p__Proteobacteria;c__Alphaproteobacteria;o__Rhizobiales;f__Rhizobiaceae;g__Neorhizobium;s__	Proteobacteria	Alphaproteobacteria	Rhizobiales	201_1
bin.331	ntc_m	d	d__Bacteria;p__Acidobacteriota;c__Blastocatellia;o__Pyrinomonadales;f__Pyrinomonadaceae;g__PSRF01;s__	Acidobacteriota	Blastocatellia	Pyrinomonadales	55_1
bin.332	ntc_m	d	d__Bacteria;p__Actinobacteriota;c__Thermoleophilia;o__Solirubrobacterales;f__70-9;g__;s__	Actinobacteriota	Thermoleophilia	Solirubrobacterales	83_1
bin.333	ntc_m	d	d__Bacteria;p__Acidobacteriota;c__Acidobacteriae;o__Bryobacterales;f__Bryobacteraceae;g__Palsa-187;s__	Acidobacteriota	Acidobacteriae	Bryobacterales	367_1
bin.34	ntc_m	d	d__Bacteria;p__Bacteroidota;c__Bacteroidia;o__Chitinophagales;f__Chitinophagaceae;g__;s__	Bacteroidota	Bacteroidia	Chitinophagales	25_1
bin.346	ntc_m	d	d__Bacteria;p__Gemmatimonadota;c__Gemmatimonadetes;o__Gemmatimonadales;f__GWC2-71-9;g__JABFSM01;s__	Gemmatimonadota	Gemmatimonadetes	Gemmatimonadales	284_1
bin.347	ntc_m	d	d__Bacteria;p__Actinobacteriota;c__UBA4738;o__UBA4738;f__UBA4738;g__AC-48;s__	Actinobacteriota	UBA4738	UBA4738	339_1
bin.350	ntc_m	d	d__Bacteria;p__Proteobacteria;c__Gammaproteobacteria;o__Steroidobacterales;f__Steroidobacteraceae;g__FEN-1191;s__	Proteobacteria	Gammaproteobacteria	Steroidobacterales	138_1
bin.354	ntc_m	d	d__Bacteria;p__Actinobacteriota;c__Actinomycetia;o__Actinomycetales;f__Microbacteriaceae;g__Lysinimonas_A;s__	Actinobacteriota	Actinomycetia	Actinomycetales	88_1
bin.355	ntc_m	d	d__Bacteria;p__Elusimicrobiota;c__Elusimicrobia;o__2-01-FULL-59-12;f__;g__;s__	Elusimicrobiota	Elusimicrobia	2-01-FULL-59-12	97_1
bin.356	ntc_m	d	d__Bacteria;p__Bacteroidota;c__Bacteroidia;o__Chitinophagales;f__UBA10324;g__;s__	Bacteroidota	Bacteroidia	Chitinophagales	65_1
bin.36	ntc_m	d	d__Bacteria;p__Gemmatimonadota;c__Gemmatimonadetes;o__Gemmatimonadales;f__GWC2-71-9;g__;s__	Gemmatimonadota	Gemmatimonadetes	Gemmatimonadales	302_1
bin.363	ntc_m	d	d__Bacteria;p__Bacteroidota;c__Bacteroidia;o__Cytophagales;f__Cyclobacteriaceae;g__Chryseolinea_A;s__	Bacteroidota	Bacteroidia	Cytophagales	60_1
bin.367	ntc_m	d	d__Bacteria;p__Bacteroidota;c__Bacteroidia;o__Chitinophagales;f__Chitinophagaceae;g__Paraflavitalea;s__	Bacteroidota	Bacteroidia	Chitinophagales	57_1
bin.375	ntc_m	d	d__Bacteria;p__Gemmatimonadota;c__Gemmatimonadetes;o__Gemmatimonadales;f__GWC2-71-9;g__20CM-2-65-7;s__	Gemmatimonadota	Gemmatimonadetes	Gemmatimonadales	300_1
bin.383	ntc_m	d	d__Bacteria;p__Proteobacteria;c__Gammaproteobacteria;o__Burkholderiales;f__SG8-39;g__;s__	Proteobacteria	Gammaproteobacteria	Burkholderiales	217_1
bin.389	ntc_m	d	d__Bacteria;p__Actinobacteriota;c__UBA4738;o__;f__;g__;s__	Actinobacteriota	UBA4738		321_1
bin.395	ntc_m	d	d__Bacteria;p__Acidobacteriota;c__Acidobacteriae;o__Bryobacterales;f__Bryobacteraceae;g__Palsa-187;s__	Acidobacteriota	Acidobacteriae	Bryobacterales	368_1
bin.396	ntc_m	d	d__Bacteria;p__Bacteroidota;c__Bacteroidia;o__Chitinophagales;f__Chitinophagaceae;g__UTBCD1;s__	Bacteroidota	Bacteroidia	Chitinophagales	32_1
bin.4	ntc_m	d	d__Bacteria;p__Proteobacteria;c__Alphaproteobacteria;o__Caulobacterales;f__Caulobacteraceae;g__NCED01;s__	Proteobacteria	Alphaproteobacteria	Caulobacterales	193_1
bin.41	ntc_m	d	d__Bacteria;p__Chloroflexota;c__Anaerolineae;o__Anaerolineales;f__EnvOPS12;g__OLB14;s__	Chloroflexota	Anaerolineae	Anaerolineales	68_1
bin.47	ntc_m	d	d__Bacteria;p__Gemmatimonadota;c__Gemmatimonadetes;o__Gemmatimonadales;f__Gemmatimonadaceae;g__AG2;s__	Gemmatimonadota	Gemmatimonadetes	Gemmatimonadales	145_1
bin.51	ntc_m	d	d__Bacteria;p__Bacteroidota;c__Bacteroidia;o__Cytophagales;f__Cyclobacteriaceae;g__ELB16-189;s__	Bacteroidota	Bacteroidia	Cytophagales	36_1
bin.68	ntc_m	d	d__Bacteria;p__Proteobacteria;c__Gammaproteobacteria;o__Burkholderiales;f__SG8-39;g__;s__	Proteobacteria	Gammaproteobacteria	Burkholderiales	215_1
bin.69	ntc_m	d	d__Bacteria;p__Proteobacteria;c__Gammaproteobacteria;o__Burkholderiales;f__Burkholderiaceae;g__Ramlibacter;s__	Proteobacteria	Gammaproteobacteria	Burkholderiales	212_1
bin.70	ntc_m	d	d__Bacteria;p__Actinobacteriota;c__Actinomycetia;o__Streptomycetales;f__Streptomycetaceae;g__Streptacidiphilus;s__Streptacidiphilus jeojiense	Actinobacteriota	Actinomycetia	Streptomycetales	323_1
bin.8	ntc_m	d	d__Bacteria;p__Proteobacteria;c__Gammaproteobacteria;o__Steroidobacterales;f__Steroidobacteraceae;g__FEN-1191;s__	Proteobacteria	Gammaproteobacteria	Steroidobacterales	139_1
bin.80	ntc_m	d	d__Bacteria;p__Verrucomicrobiota;c__Verrucomicrobiae;o__Opitutales;f__Opitutaceae;g__CAIYFD01;s__	Verrucomicrobiota	Verrucomicrobiae	Opitutales	137_1
bin.86	ntc_m	d	d__Bacteria;p__Proteobacteria;c__Alphaproteobacteria;o__Rhizobiales;f__Xanthobacteraceae;g__Pseudolabrys;s__	Proteobacteria	Alphaproteobacteria	Rhizobiales	158_1
[truncated: 96 more rows]
