# Supplementary material for: A metabolic modeling-based framework for predicting trophic dependencies in native rhizobiomes of crop plants
Source: bioRxiv preprint, doi:10.1101/2023.12.11.571117, version 2 (2024-07-07)
Supplement: Pathway completion analysis (KEGG pathway decoder) of MAGs [file 571117_file03.xlsx]

## Sheet: All_average
Group	Function	a.bin.100	a.bin.10	a.bin.119	a.bin.125	a.bin.126	a.bin.138	a.bin.139	a.bin.13	a.bin.140	a.bin.143	a.bin.144	a.bin.14	a.bin.159	a.bin.160	a.bin.163	a.bin.166	a.bin.168	a.bin.16	a.bin.181	a.bin.190	a.bin.1	a.bin.200	a.bin.207	a.bin.210	a.bin.21	a.bin.221	a.bin.228	a.bin.231	a.bin.235	a.bin.238	a.bin.239	a.bin.243	a.bin.244	a.bin.24	a.bin.259	a.bin.294	a.bin.296	a.bin.297	a.bin.298	a.bin.303	a.bin.319	a.bin.321	a.bin.322	a.bin.329	a.bin.344	a.bin.345	a.bin.348	a.bin.350
Amino acid metabolism	Serine pathway/formaldehyde assimilation	0.3	0.3	0.4	0.6	0.5	0.3	0.4	0.5	0.4	0.3	0.4	0.5	0.3	0.3	0.4	0.3	0.5	0.4	0.3	0.3	0.4	0.6	0.2	0.4	0.3	0.3	0.3	0.3	0.5	0.4	0.5	0.8	0.2	0.6	0.5	0.3	0.5	0.5	0.3	0.3	0.5	0.5	0.3	0.6	0.3	0.5	0.3	0.5
Anaplerotic Reactions	Anaplerotic genes	0.25	0.25	0.5	0.5	0.5	0.5	0.5	0.5	0.5	0.5	0.5	0.5	0.25	0.5	0.5	0.25	0.5	0.5	0.5	0.25	0.5	0.75	0.25	0.25	0.5	0.5	0.25	0.25	0.75	0.5	0.5	1	0.5	0.25	0.5	0.5	0.5	0.5	0.5	0.5	0.25	0.5	0.25	0.5	0.5	0.75	0.25	0.5
Anaplerotic Reactions	Glyoxylate shunt	1	1	0	1	1	1	1	0	0	1	0	1	0	1	0	0	0	1	0	1	0	0	1	1	0	0	0	1	1	1	0	1	0	0	0	0	0	0	1	0	0	1	1	0	0	0	0	0
Arsenic reduction	Arsenic reduction	0	0.5	0.5	1	0.5	0.5	0.75	0.5	0.5	0.5	0.5	0.25	0.25	0.25	0.5	0.5	0.75	0.5	1	0.5	0.5	1	0.5	0.5	0.5	0.25	0.75	0.5	0.5	0.5	0.75	0.5	0.75	0.5	0.5	0.5	0.75	0.25	0.25	0.5	0.75	0.5	1	0.75	0.5	0.5	0.5	0.25
Bacterial Secretion Systems	Twin Arginine Targeting	0.5	0.5	0.75	0.75	0.5	0.5	0.75	0.5	0.5	0.75	0.5	0.75	0.5	0.75	0.75	0.75	0.75	0.75	0.75	0.5	0.5	0.75	0.5	0.5	0.5	0.5	0.5	0.5	0.75	0.75	0.5	0.75	0.5	0.75	0.75	0.5	0.5	0.5	0.75	0.5	0.75	0.5	0.5	0.5	0.75	0.5	0.75	0.25
Bacterial Secretion Systems	Sec-SRP	0.747	0	0.664	0.581	0.747	0.81	0.664	0.81	0.63	0.83	0	0.747	0.72	0.664	0.747	0.747	0.747	0.581	0.747	0.664	0.664	0.747	0.81	0.747	0.63	0	0.72	0.747	0	0.913	0.81	0.747	0	0.83	0.83	0.81	0	0.81	0.747	0.81	0.747	0.83	0	0	0.747	0.72	0.747	0.72
Bacterial Secretion Systems	Type I Secretion	0.33	0.33	0.33	0.33	0.33	0.33	0	0	0.33	0.33	0.33	0.33	0.33	0.33	0.66	0.33	0.99	0.33	0	0.33	0.33	0.33	0.33	0.33	0.33	0.33	0	0.33	0	0.33	0.33	0.99	0	0.33	0.33	0.33	0.33	0.33	0.33	0.33	0	0.33	0	0	0.33	0	0.33	0.33
Bacterial Secretion Systems	Type II Secretion	0.3076	0.3845	0.1538	0.3845	0.0769	0	0.1538	0.3845	0	0.6921	0.1538	0.8459	0.4614	0.8459	0.3845	0.6921	0	0.6921	0	0.1538	0.0769	0.3845	0	0.1538	0.769	0	0.0769	0.2307	0	0	0.0769	0	0	0.769	0.2307	0.4614	0.5383	0	0	0	0.1538	0.1538	0	0.1538	0.8459	0.3076	0.0769	0.3845
Bacterial Secretion Systems	Type VI Secretion	0	0	0.333	0.444	0	0	0.111	0.333	0	0.111	0	0.111	0.111	0.111	0	0	0	0	0.111	0.111	0	0.555	0.111	0	0.666	0.111	0	0	0.111	0	0.333	0.111	0	0	0.555	0.444	0	0.111	0.666	0.222	0.111	0	0	0.333	0.111	0	0	0.111
Bacterial Secretion Systems	Type IV Secretion	0	0	0	0	0	0	0.083	0	0	0	0	0	0.083	0	0	0.664	0.664	0.747	0	0.083	0	0	0	0	0	0	0	0	0	0.747	0	0	0	0	0.083	0	0	0	0.083	0	0	0	0	0	0	0	0	0
Bacterial Secretion Systems	Type III Secretion	0	0	0	0	0	0	0	0	0	0	0	0	0	0	0	0	0	0	0	0	0	0	0	0	0	0	0	0	0	0	0	0	0	0	0	0	0	0	0	0	0	0	0	0	0	0	0	0
Biofilm formation	Biofilm PGA Synthesis protein	0.25	0.25	0	0.25	0.25	0	0	0	0.25	0.75	0.25	0.25	0.25	0	0.25	0	0.25	0	0	0.25	0.25	0	0	0.25	0	0.25	0.25	0.5	0	0	0	0	0	0	0	1	0.25	0.25	0	0	0	0.25	0	0.25	0	0	0.25	0.25
Biofilm formation	Curli fimbriae biosynthesis	0	0	0	0	0	0	0	0	0	0	0	0	0	0	0	0	0	0	0	0	0	0	0	0	0	0	0	0	0	0	0	0	0	0	0	0	0	0	0	0	0	0	0	0	0	0	0	0
Biosynthesis of amino acids	glycine	1	1	1	1	1	1	1	1	1	1	1	1	1	1	0	1	1	1	1	1	1	1	1	1	1	1	1	1	1	1	1	1	1	1	1	1	1	1	1	1	1	1	1	1	1	1	1	1
Biosynthesis of amino acids	threonine	1	1	1	1	1	1	1	1	1	1	1	1	1	1	1	1	1	1	1	1	1	1	1	1	1	1	1	1	1	1	1	1	1	1	1	1	1	1	1	1	1	1	1	1	1	1	1	1
Biosynthesis of amino acids	isoleucine	0.166	0.166	0.166	0.83	0.664	0.498	0.83	0.83	0.83	0.83	0.83	0.83	0.166	0.83	0.83	0.332	0.83	0.332	0.83	0.166	0.83	0.83	0.166	0.83	0.664	0.664	0.83	0.332	0.498	0.664	0.83	0.664	0.166	0.83	0.664	0.83	0.166	0.83	0.498	0.83	0.166	0.83	0.166	0.166	0.83	0.83	0.166	0.332
Biosynthesis of amino acids	valine	0.166	0.166	0.166	0.83	0.664	0.498	0.83	0.83	0.83	0.83	0.83	0.83	0.166	0.83	0.83	0.332	0.83	0.332	0.83	0.166	0.83	0.83	0.166	0.83	0.664	0.664	0.83	0.332	0.498	0.664	0.83	0.664	0.166	0.83	0.664	0.83	0.166	0.83	0.498	0.83	0.166	0.83	0.166	0.166	0.83	0.83	0.166	0.332
Biosynthesis of amino acids	leucine	0.25	0.25	0.25	1	1	1	1	0.75	1	1	0.75	1	1	1	1	0.25	0.75	0.25	1	1	1	1	0.25	1	0.75	0.75	1	0.5	0.25	1	0.75	0.75	0.25	1	0.75	1	0.25	1	0.25	1	0.75	1	0.5	1	0.75	1	1	1
Biosynthesis of amino acids	serine	1	1	1	1	1	1	1	1	1	1	1	1	1	1	1	1	1	1	1	1	1	1	0	1	1	1	1	1	1	1	1	1	1	1	1	1	1	1	1	1	1	1	1	1	1	1	1	1
Biosynthesis of amino acids	methionine	1	1	1	1	1	1	1	1	1	1	1	1	1	1	1	1	1	1	1	1	1	1	1	1	1	1	1	1	1	1	1	1	1	1	1	1	1	1	1	1	1	1	1	1	1	1	1	1
Biosynthesis of amino acids	glutamine	1	1	1	1	1	1	1	1	1	1	1	1	1	1	1	1	1	1	1	1	1	1	1	1	1	1	1	0	1	1	1	1	1	0	1	1	1	1	1	1	1	1	1	1	1	1	1	1
Biosynthesis of amino acids	tryptophan	1	1	1	0.5	0	0.5	1	1	1	1	1	1	1	1	1	0.5	0.5	1	1	1	1	1	0	1	1	1	1	1	1	1	1	1	0	1	1	1	1	1	1	1	1	1	1	1	0.5	1	1	1
Biosynthesis of amino acids	lysine	1	0	1	1	0	1	1	1	1	1	0	1	1	1	1	1	1	1	1	1	1	1	1	1	0	0	1	0	1	1	1	1	1	1	1	1	1	1	0	1	1	1	0	1	1	1	1	1
Biosynthesis of amino acids	cysteine	0	1	1	1	1	1	0	1	1	1	1	1	1	1	0	0	0	1	0	1	1	1	1	1	1	1	1	1	1	1	1	1	0	1	0	1	1	1	1	1	1	1	1	1	0	1	1	1
Biosynthesis of amino acids	alanine	1	1	1	1	0	0	1	1	1	1	1	1	1	1	0	1	1	1	1	1	1	1	1	1	1	1	1	1	0	1	1	1	1	1	1	1	1	1	1	1	1	1	1	1	1	1	1	1
Biosynthesis of amino acids	arginine	0	1	1	1	0	1	1	1	0	1	1	1	1	1	1	1	1	1	1	1	1	1	0	1	1	1	1	1	1	1	1	1	0	1	1	1	1	1	1	0	1	1	0	1	1	1	1	1
Biosynthesis of amino acids	asparagine	1	1	1	1	1	1	0	1	1	1	1	1	0	0	1	1	1	1	0	1	1	1	1	1	1	1	1	1	1	1	1	0	1	1	1	1	1	1	1	1	1	1	0	1	0	1	1	1
Biosynthesis of amino acids	proline	1	1	1	1	1	1	1	1	1	1	1	1	0	1	1	1	1	1	1	1	1	1	1	1	1	1	1	1	0	0	1	1	1	1	1	1	0	1	1	1	0	1	1	1	1	1	1	0
Biosynthesis of amino acids	aspartate	1	1	1	1	1	1	1	1	1	0	1	1	1	1	1	0	1	0	1	1	0	1	1	1	1	1	0	1	1	0	1	1	1	1	1	1	0	1	0	1	1	1	0	1	1	1	0	1
Biosynthesis of amino acids	glutamate	1	1	1	1	1	1	1	1	1	0	1	1	1	1	1	0	1	0	1	1	0	1	1	1	1	1	0	1	1	0	1	1	1	1	1	1	0	1	0	1	1	1	0	1	1	1	0	1
Biosynthesis of amino acids	histidine	0	0	0	1	1	1	1	1	1	1	1	1	1	1	1	0	1	0	0	1	1	1	0	1	0	1	0	0	0	1	1	1	0	1	1	1	1	1	0	0	0	0	0	1	1	1	1	1
Biosynthesis of amino acids	phenylalanine	0	0	0	0	1	0	1	1	0	1	1	1	1	1	1	0	0	0	1	0	0	0	0	0	0	0	1	0	0	0	1	1	0	1	1	1	0	0	0	0	0	1	0	0	1	1	0	0
Biosynthesis of amino acids	tyrosine	0	0	0	0	0	0	0	0	0	0	0	1	0	0	1	0	1	0	0	0	0	0	0	0	0	0	0	0	0	0	0	1	0	0	0	0	0	0	0	0	0	0	0	0	0	0	0	0
Butanoate metabolism	polyhydroxybutyrate synthesis	0.167	0.167	0.167	0.167	0.167	0.167	0.334	0.167	0.167	0.501	0.167	1.001	0.167	0.167	0.834	0.834	0.834	0.834	0.334	0.167	0.167	0.167	0.167	0.167	0.167	0.167	0.167	0.167	0.334	0.834	0.167	0.834	0.167	0.167	0.167	0.167	0.167	0.167	0.834	0.167	0.167	0.167	0.167	0.167	1.001	0.167	0.167	0.167
Carbohydrate metabolism	glycolysis	0.44	0.67	0.56	0.78	0.56	0.89	0.56	0.56	0.89	0.89	0.67	0.78	0.78	0.89	0.78	0.67	0.89	0.67	0.89	0.56	0.56	0.78	0.67	0.56	0.56	0.78	0.67	0.56	0.67	1	0.56	0.67	0.44	0.56	0.56	0.67	0.78	0.89	0.78	0.78	0.67	0.56	0.56	0.78	0.89	0.56	0.56	0.78
Carbohydrate metabolism	TCA Cycle	0.75	0.75	0.5	0.88	0.5	0.5	0.88	0.75	0.5	0.62	0.75	0.88	0.62	0.88	1	0.5	0.75	0.62	0.5	0.75	0.75	0.88	0.5	0.62	0.5	0.5	0.5	0.62	0.5	0.88	0.75	0.75	0.62	0.62	0.88	0.75	0.62	0.62	0.62	0.5	0.75	0.75	0.62	0.75	0.88	0.75	0.75	0.5
Carbohydrate metabolism	Sulfolipid biosynthesis	0	0	0	0.5	0	0	0	0	0	0	0	0	0	0	0	0	0	0	0	0	0	0	0	0	0	0	0	0	0	0	0	0	0	0	0	0	0	0	0	0	0	0	0	0	0	0	0	0
Carbon degradation	beta-N-acetylhexosaminidase	1	1	1	1	0	1	0	0	1	1	1	1	0	1	1	1	1	1	0	1	1	1	1	1	0	1	0	1	1	1	0	1	1	1	1	1	1	1	1	1	1	1	1	1	1	0	1	0
Carbon degradation	beta-glucosidase	0	0	1	1	0	1	0	0	1	0	1	1	1	1	0	0	1	0	1	1	1	1	1	1	0	1	0	1	1	1	0	1	0	0	0	1	1	1	1	1	0	1	1	1	1	0	1	1
Carbon degradation	D-galacturonate epimerase	0	1	1	0	0	0	0	1	1	1	1	1	0	0	1	1	0	1	0	1	1	0	1	0	1	0	0	1	0	1	1	1	0	0	0	1	0	1	1	0	1	1	0	1	1	1	1	0
Carbon degradation	D-galacturonate isomerase	0	0	0	1	0	1	0	1	1	0	1	0	0	0	0	1	0	1	0	0	0	1	0	1	0	1	0	0	0	0	1	1	0	0	0	0	0	1	0	1	0	0	0	0	0	1	0	0
Carbon degradation	diacetylchitobiose deacetylase	1	0	1	1	0	0	0	0	1	0	1	0	0	0	1	0	1	0	1	1	0	1	1	1	1	0	0	1	1	0	0	1	0	0	0	1	0	1	0	1	1	1	0	1	0	1	0	0
Carbon degradation	chitinase	0	0	0	1	0	1	0	0	1	0	0	0	0	0	0	0	0	0	0	0	0	0	0	0	1	0	0	0	1	0	1	0	0	0	0	1	0	1	1	1	0	0	0	0	1	1	0	0
Carbon degradation	glucoamylase	0	0	0	0	0	0	0	0	0	0	0	0	0	1	0	0	0	0	0	1	1	1	0	1	0	0	0	0	0	0	1	1	0	1	1	0	1	0	0	0	0	0	1	0	0	1	1	0
Carbon degradation	alpha-amylase	0	0	0	0	0	1	0	0	0	0	0	0	0	0	0	0	0	0	0	1	0	0	0	0	0	0	0	0	0	1	0	0	0	0	0	0	0	1	1	1	0	1	0	0	0	0	0	0
Carbon degradation	oligogalacturonide lyase	0	0	0	1	0	0	0	0	0	0	0	0	0	0	0	0	0	0	0	0	1	1	0	0	0	1	0	0	0	0	0	0	0	0	0	0	0	1	0	0	0	0	0	1	0	0	1	0
Carbon degradation	pullulanase	0	0	0	0	0	0	0	0	0	0	0	0	0	0	0	0	0	0	0	0	0	0	0	0	0	0	0	0	0	0	0	0	0	0	0	0	0	0	0	0	0	0	0	0	0	0	0	0
Carbon degradation	exopolygalacturonase	0	0	0	0	0	0	0	0	0	0	0	0	0	0	0	0	0	0	0	0	0	0	0	0	0	0	0	0	0	0	0	0	0	0	0	0	0	0	0	0	0	0	0	0	0	0	0	0
Carbon degradation	cellulase	0	0	0	0	0	0	0	0	0	0	0	0	0	0	0	0	0	0	0	0	0	0	0	0	0	0	0	0	0	0	0	0	0	0	0	0	0	0	0	0	0	0	0	0	0	0	0	0
Carbon degradation	basic endochitinase B	0	0	0	0	0	0	0	0	0	0	0	0	0	0	0	0	0	0	0	0	0	0	0	0	0	0	0	0	0	0	0	0	0	0	0	0	0	1	0	0	0	0	0	0	0	0	0	0
Carbon fixation	3-Hydroxypropionate Bicycle	0.18	0.12	0.12	0.18	0.18	0.12	0.18	0.18	0.24	0.18	0.18	0.24	0.06	0.24	0.41	0.18	0.29	0.18	0.29	0.18	0.18	0.18	0.18	0.18	0.12	0.12	0.24	0.18	0.18	0.18	0.18	0.41	0.12	0.12	0.18	0.18	0.24	0.24	0.18	0.12	0.18	0.18	0.18	0.18	0.12	0.24	0.18	0.12
Carbon fixation	4-Hydroxybutyrate/3-hydroxypropionate	0.3	0.1	0.3	0.4	0.1	0.3	0.2	0.2	0.3	0.2	0.3	0.3	0.1	0.2	0.3	0.2	0.3	0.3	0.1	0.3	0.3	0.3	0.3	0.3	0.3	0.3	0.3	0.3	0.3	0.3	0.3	0.3	0.1	0.1	0.3	0.2	0.3	0.2	0.3	0.2	0.3	0.2	0.3	0.3	0.1	0.2	0.3	0.2
Carbon fixation	gluconeogenesis	0	0	0.67	0	0	0.89	0	0.67	0.89	1	0	0.89	0	1	0	0	0	0	0	0	0	0	0.67	0	0	0.89	0	0.67	0	0	0	0	0	0	0	0	0.89	0.89	0	0.78	0	0	0	0	1	0	0	0
Carbon fixation	Wood-Ljungdahl	0	0	0	0.17	0	0	0.17	0	0	0	0.17	0.17	0	0	0.17	0	0.17	0	0.17	0.17	0	0.17	0	0	0	0	0	0	0.17	0	0	0.17	0	0.17	0.17	0	0	0	0	0	0	0	0	0.17	0	0	0	0
Carbon fixation	CBB Cycle	0	0	0	0	0	0	0	0	0	0	0	0	0	1	0	0	0	0	0	0	0	0.88	0	0	0.88	0	0	0	0	0	0	0	0	0	0	0	0	0	0	0	0	0	0	0	1	0	0	0
Carbon fixation	RuBisCo	0	0	0	0	0	0	0	0	0	0	0	0	0	1	0	0	0	0	0	0	0	1	0	0	1	0	0	0	0	0	0	0	0	0	0	0	0	0	0	0	0	0	0	0	1	0	0	0
Carotenoid biosynthesis	end-product myxoxanthophylls	0.33	0.33	0.33	0.33	0.33	0.33	0.33	0.33	0.33	0.33	0.33	0	0	0	0	0	0.33	0	0.33	0.33	0.33	0.33	0.33	0.33	0.33	0.33	0.33	0.33	0.33	0	0.33	0	0.33	0.33	0.33	0.33	0.33	0.33	0	0.33	0.33	0.33	0.33	0.33	0.33	0.33	0	0
Carotenoid biosynthesis	staphyloaxanthin biosynthesis	0.167	0	0.167	0.167	0.167	0	0	0.167	0.167	0	0	0.167	0.167	0	0	0.167	0.167	0.167	0	0.167	0	0.167	0.167	0.167	0	0	0.167	0.167	0.334	0	0.167	0.167	0.167	0	0.167	0.167	0.167	0	0	0.167	0.167	0.167	0.167	0.167	0	0.167	0	0.167
Carotenoid biosynthesis	carotenoids backbone biosynthesis	0.4	0.4	0	0.4	0.4	0.6	0.4	0	0.4	0	0.4	0	0	0	0.4	0	0.4	0	0	0	0	0.4	0.4	0.4	0	0.6	0.4	0	0.8	0	0	0.4	0	0	0.4	0.4	0	0	0	0.2	0	0.4	0.4	0	0	0.4	0	0.4
Carotenoid biosynthesis	Retinal from apo-carotenals	0	0	0	0	0	0	0	0	0	0	0	0	0	0	0	0	0	0	0	0	0	0	0	0	0	0	0	0	0	0	0	0	0	0	0	0	0	0	0	0	0	0	0	0	0	0	0	0
Carotenoid biosynthesis	end-product nostoxanthin	0	0	0	0	0	0	0	0	0	0	0	0	0	0	0	0	0	0	0	0	0	0	0	0	0	0	0	0	0	0	0	0	0	0	0	0	0	0	0	0	0	0	0	0	0	0	0	0
Carotenoid biosynthesis	end-product astaxanthin	0	0	0	0	0	0	0	0	0	0	0	0	0	0	0	0	0	0	0	0	0	0	0	0	0	0	0	0	0	0	0	0	0	0	0	0	0	0	0	0	0	0	0	0	0	0	0	0
Cell motility	Chemotaxis	0.25	0.25	0.38	0.88	0.75	0.38	0.38	0.75	0.12	0.25	0.62	0.75	0.75	0.25	0.75	0.5	0.88	0.5	0	0.25	0.12	0.88	0.25	0.75	0.38	0.38	0	0	0.88	0.5	0.5	0.25	0	0.88	0.38	0.62	0.62	0.25	0.5	0.38	0.5	0.88	0.12	0	0.25	0.38	0.12	0.62
Cell motility	Flagellum	0.04	0	0	0.91	0.83	0.04	0	0.91	0.04	0	0	1	0.96	0.96	0.74	0.3	0.83	0	0	0	1	0.91	0.04	0	0.52	0.04	0.74	0.7	0	0	0.96	0.09	0	0	0.96	0	0	0.04	0	0.04	0	0.13	0	0	0	0.96	1	1
Competence-related DNA transporter	Competence-related core components	0.21	0.14	0.28	0.21	0.21	0.21	0.14	0.21	0.21	0.21	0.21	0.21	0.28	0.21	0.14	0.14	0.14	0.14	0.21	0.21	0.21	0.21	0.28	0.14	0.21	0.14	0	0.14	0.21	0	0.21	0.14	0.21	0.14	0.21	0.14	0.28	0.07	0.14	0.21	0.21	0.21	0.28	0.21	0.07	0.21	0.14	0.28
Competence-related DNA transporter	Competence factors	0	0	0	0	0	0	0	0	0	0	0	0	0	0	0	0	0	0	0	0	0	0	0	0	0	0	0	0	0	0	0	0	0	0	0	0	0	0	0	0	0	0	0.14	0	0	0	0	0
Degradation of aromatic compounds	Naphthalene degradation to salicylate	0	0	0	0	0	0	0	0	0	0	0	0	0	0	0	0	0	0	0	0	0	0	0	0	0	0	0	0	0	0	0	0	0	0	0	0	0	0	0	0	0	0	0	0	0	0	0	0
Hydrogen redox	NiFe hydrogenase Hyd-1	0	0	0	0.33	0	0	0	0	0	0.33	0.33	0.33	0	0.33	0	0.33	0	0	0	0.33	0	0	0	0.33	0	0	0	0	0.33	0.33	0	0	0	0.66	0.33	0	0.33	0	0.33	0	0	0.33	0	0	0	0.33	0	0
Hydrogen redox	NAD-reducing hydrogenase	0	0	0	0.5	0	0	0	0	0.75	0	0	0	0	0	0	0	0	0	0	0	0	0	0	0.25	0	0	0	0	0	0	0	0	0	0	0	0	0	0	0	0	0	0	0	0	0	0	0	0
Hydrogen redox	NADP-reducing hydrogenase	0	0	0	0	0	0	0	0	0	0	0	0	0	0	0	0	0	0	0	0	0	0	0	0	0	0	0	0	0	0	0	0	0	0	0	0	0	0	0	0	0	0	0	0	0	0	0	0
Metal Transporters	Copper transporter CopA	0	1	1	1	0	0	0	1	0	0	1	1	0	1	1	0	1	1	1	1	1	1	0	1	1	0	0	1	1	1	1	1	1	1	1	1	1	0	0	0	1	1	1	1	0	1	1	0
Metal Transporters	Cobalt transporter CorA	0	0	1	0	0	1	1	1	1	1	1	1	0	1	1	1	1	1	1	1	1	0	0	0	0	0	1	1	1	1	0	1	1	1	1	1	1	1	1	1	1	0	1	1	1	1	1	0
Metal Transporters	Fe-Mn transporter MntH	1	0	0	1	0	1	0	0	1	0	0	0	1	0	0	0	0	0	0	0	0	1	1	1	0	0	1	1	1	0	1	1	0	0	1	1	1	1	0	1	0	1	1	0	0	0	0	1
Metal Transporters	Ferrous iron transporter FeoB	1	0	0	1	0	1	0	1	1	0	1	1	1	0	0	0	1	0	0	0	1	1	0	0	1	0	0	0	1	1	1	0	0	0	0	1	1	1	0	1	1	0	0	1	0	1	1	1
Metal Transporters	Ferric iron ABC-type substrate-binding AfuA	0	0	0	0	0	0	0	1	0	0	0	0	0	0	1	0	0	0	1	1	0	0	0	0	0	0	0	0	0	0	1	1	0	1	0	0	0	0	0	0	1	0	0	0	0	0	0	0
Metal Transporters	Cobalt transporter CbiMQ	0	0	0	1	0	0	0	0.5	0	0	0	0	0	0	0	0	0	0	0	0	0	0.5	0	0	0	0	0	0	1	0	0	0	0	0	0	0	0	0	0	0	0	0	0	0	0	1	1	0
Methane metabolism	Methanogenesis via CO2	0	0	0	0.05	0.05	0	0.05	0.25	0	0	0.1	0	0	0	0.05	0	0	0	0.05	0	0	0.05	0	0.05	0	0	0.05	0	0.1	0	0.25	0	0.05	0.05	0	0	0	0	0	0	0.05	0.05	0.05	0	0	0.25	0	0
Methane metabolism	Coenzyme B/Coenzyme M regeneration	0	0	0.2	0	0	0.2	0	0	0.2	0	0	0	0	0	0	0	0	0	0	0	0	0	0.2	0	0	0.2	0	0	0.4	0	0	0	0.2	0	0	0	0	0.2	0	0.2	0.2	0	0.2	0	0	0	0	0.2
Methane metabolism	Methanogenesis via trimethylamine	0	0	0	0	0	0	0	0	0	0	0	0	0	0	0	0	0	0	1	0	0	0	0	0	0	0	0	0	0	0	0	1	0	0	0	0	0	0	0	0	0	0	0	0	0	0	0	0
Methane metabolism	dimethylamine/trimethylamine dehydrogenase	0	0	0	0	0	0	0	0	0	0	0	0	0	0	0	0	0	0	0	0	0	0	0	0	0	0	0	0	0	0	0	0	0	0	0	0	0	0	1	0	0	0	0	0	0	0	0	0
Mixed Acid Fermentation	Mixed acid: PEP to Succinate via OAA, malate & fumarate	0.083	0.3955	0.333	0.458	0.333	0.3125	0.458	0.3955	0.3955	0.3955	0.3125	0.5205	0.25	0.458	0.5205	0.333	0.458	0.3955	0.3125	0.3955	0.3955	0.458	0.5625	0.3955	0.3125	0.5625	0.333	0.3955	0.25	0.3955	0.3955	0.458	0.3125	0.3955	0.3955	0.3955	0.3955	0.5625	0.3955	0.3125	0.3955	0.3955	0.333	0.3955	0.3955	0.458	0.3955	0.25
Mixed Acid Fermentation	Mixed acid: Acetate	0.5	0	0.5	1	1	0.5	1	0	0.5	0.5	0.5	0.5	0	0.5	0.5	0.5	0	0.5	0	0.5	0.5	0.5	0.5	0.5	0.5	0.5	1	0.5	0.5	0.5	1	1	0.5	1	1	0.5	0.5	0.5	1	1	1	1	1	0.5	0.5	1	0.5	0
Mixed Acid Fermentation	Mixed acid: Ethanol, Acetate to Acetylaldehyde	1	0	1	1	1	0	0	1	1	0	0	1	1	0	0	1	1	1	0	1	1	1	0	1	0	0	1	1	1	0	1	1	1	0	1	1	1	0	0	0	1	1	1	1	1	1	1	1
Mixed Acid Fermentation	Mixed acid: Formate to CO2 & H2	0.167	0.167	0.334	0.501	0.334	0	0.334	0	0	0	0.167	0	0.167	0	0.501	0.167	0	0.167	0	0	0	0.501	0	0.167	0.167	0	0.167	0	0.167	0	0.167	0	0	0.167	0.167	0	0.167	0	0	0	0.334	0.334	0	0.167	0.501	0	0	0
Mixed Acid Fermentation	Mixed acid: Ethanol, Acetyl-CoA to Acetylaldehyde (reversible)	0	0	0	1	0	0	0	1	0	0	1	0	0	1	0	0	1	0	0	1	0	1	0	0	0	0	0	0	0	0	1	0	0	0	0	1	0	0	0	0	1	1	0	1	0	1	0	0
Mixed Acid Fermentation	Mixed acid: Lactate	0	0	0	0	0	0	0	1	1	0	0	0	1	0	0	0	0	0	0	0	0	0	0	0	0	0	0	0	0	0	1	0	0	0	0	1	0	0	0	0	0	0	0	0	0	1	0	1
Mixed Acid Fermentation	Mixed acid: Formate	0	0	0	0	0	0	0	0	0	0	0	0	0	0	0	0	0	0	0	1	0	0	0	0	1	0	0	0	0	0	0	0	0	0	0	0	0	0	0	0	0	0	0	1	0	0	0	0
Nitrogen metabolism	DNRA	0	0	0	1	0	0	0	1	0	0	0	1	0	1	0	0	0	0	0	0	0	0	0	0	1	0	0	0	1	0	1	0	0	0	0	0	0	1	0	0	0	0	0	0	0	0	0	0
Nitrogen metabolism	nitrite reduction	0	0	0	0	0	0	0	0	1	1	0	0	0	1	0	0	0	0	0	0	0	0	0	0	0	0	0	0	0	0	0	0	1	0	1	0	1	0	0	1	0	0	0	0	0	0	0	0
Nitrogen metabolism	nitrous-oxide reduction	0	0	0	0	0	0	0	0	1	0	0	0	0	0	0	0	0	0	0	0	0	0	1	0	0	0	0	0	0	0	0	0	0	0	0	0	0	0	0	1	0	0	0	0	0	0	0	0
Nitrogen metabolism	dissim nitrate reduction	0	0	0	0	0	0	0	0	0	0	0	0	0	0	1	0	0	0	0	0	0	0	0	0	0	0	0	0	0	0	0	0	0	0	0	0	0	0	0	0	0	0	0	0	0	0	0	0
Nitrogen metabolism	hydroxylamine oxidation	0	0	0	0	0	0	0	0	0	0	0	0	0	0	0	0	0	0	0	0	0	0	0	0	0	0	0	0	0	0	0	0	0	0	0	0	0	0	0	0	0	1	0	0	0	0	0	0
Nitrogen metabolism	nitrite oxidation	0	0	0	0	0	0	0	0	0	0	0	0	0	0	1	0	0	0	0	0	0	0	0	0	0	0	0	0	0	0	0	0	0	0	0	0	0	0	0	0	0	0	0	0	0	0	0	0
Nitrogen metabolism	nitrogen fixation	0	0	0	0	0	0	0	0	0	0	0	0	0	0	0	0	0	0	0	0	0	0	0	0	0	0	0	0	0	0	0	0	0	0	0	0	0	0	0	0	0	0	0	0	0	0	0	0
Nitrogen metabolism	ammonia oxidation (amo/pmmo)	0	0	0	0	0	0	0	0	0	0	0	0	0	0	0	0	0	0	0	0	0	0	0	0	0	0	0	0	0	0	0	0	0	0	0	0	0	0	0	0	0	0	0	0	0	0	0	0
Oxidative phosphorylation	F-type ATPase	0.875	0.75	0.75	1	0.875	0.75	1	1	0.375	0.5	0.875	1	0.75	1	0.875	0.5	0.25	0.375	0.625	1	1	0.875	1	0.875	1	0.75	0.75	1	1	0.375	1	0.5	1	1	0.875	0.875	1	1	0.25	0.875	1	0.875	1	1	0.125	1	1	0.75
Oxidative phosphorylation	NADH-quinone oxidoreductase	0.77	0.7	0.77	0.91	0.77	0.56	0.91	0.84	0.7	0.91	0.91	0.98	0.77	0.84	0.56	0.84	0.56	0.84	0.84	0.91	0.91	0.84	0.77	0.91	0.84	0.63	0.35	0.63	0.77	0.91	0.91	0.91	0.21	0.91	0.91	0.77	0.77	0.84	0.91	0.56	0.91	0.91	0.91	0.91	0.84	0.84	0.91	0.77
Oxidative phosphorylation	Cytochrome c oxidase	0.75	0.5	1	1	0.25	0.75	0.75	0.75	0.75	0.75	0.75	0.75	0.75	0.75	1	0.5	0.25	0.25	1	0.75	0.75	1	0.75	0.75	0.75	0.75	0.75	1	0	0.75	1	0.25	0.5	1	1	0.5	1	0.75	1	0.75	1	0.75	0.75	0.75	0.5	1	0.75	0.75
Oxidative phosphorylation	bidirectional polyphosphate	0.5	0.5	1	0.5	0.5	1	1	0.5	1	1	0.5	1	1	1	0.5	1	1	1	1	1	1	0.5	1	1	0.5	1	0.5	0	1	1	1	1	0	0	0.5	1	1	1	1	1	1	0	0.5	1	1	1	1	1
Oxidative phosphorylation	Cytochrome bd complex	0	0.5	0	1	1	0	0	0.5	1	1	0	1	0	1	1	1	1	1	0	0	0	1	0	0	0.5	0	0	1	1	0	1	1	0	1	0	0	0	1	0	0	0	1	1	0	1	0.5	0	1
Oxidative phosphorylation	Ubiquinol-cytochrome c reductase	0	0	0	0.33	0	0	0	0.33	0	0.99	0	0.99	0	0.99	1	0.99	0.66	0.99	0	0	0	0.33	0	0	0	0	0	0	0	0.99	0.33	0.99	0	0	0.33	0.33	0	0	0.99	0	0	0	0	0.33	0.99	0.33	0	0
Oxidative phosphorylation	Cytochrome c oxidase, cbb3-type	0	0	0.25	0.25	0	0	0	0	0.25	1	0	0.25	0	0	0.75	0	0.25	0	0	0	0	0.25	0.5	0.25	0	0	0	0	0	0	0	0	0	0	0.25	0.25	0.25	0	0	0	0.25	0.25	0	0	0	0	0	0
Oxidative phosphorylation	Cytochrome o ubiquinol oxidase	0	0	0	0	0	0	0	0	0	0	0	0	0	0	0	0	1	0	0	0	0	0	0	0	0	0	0	0	0	0.75	0	1	0	0	0	0	0	0	1	0	0	0	0	0	0	0	0	0
Oxidative phosphorylation	NAD(P)H-quinone oxidoreductase	0	0	0	0	0	0	0	0	0	0	0	0	0	0	0	0	0	0	0	0	0	0	0	0	0	0	0	0	0	0	0	0	0	0.07	0	0	0	0	0	0	0	0	0	0	0	0	0	0
Oxidative phosphorylation	V-type ATPase	0	0	0	0	0	0	0	0	0	0	0	0	0	0	0	0	0	0	0	0	0	0	0	0	0	0	0	0	0	0	0	0	0	0	0	0	0	0	0	0	0	0	0	0	0	0	0	0
Oxidative phosphorylation	Na-NADH-ubiquinone oxidoreductase	0	0	0	0	0	0	0	0	0	0	0	0	0	0	0	0	0	0	0	0	0	0	0	0	0	0	0	0	0	0	0	0	0	0	0	0	0	0	0	0	0	0	0	0	0	0	0	0
Pentose phosphate pathway	Entner-Doudoroff Pathway	0.5	0.5	0.5	0.75	0.5	0.75	0.5	0.75	0.75	0.5	0.75	1	0.75	0	0	0	0.75	0.25	0.5	0.75	0.5	0.75	0.75	0.75	0.75	0.75	0.5	0.5	0.5	1	0.75	0.75	0.5	0.75	0.75	0.75	0.5	0.75	1	0.75	0.5	0.5	0.75	0.75	1	0.75	0.5	0.5
Phosphonate and phosphinate metabolism	CP-lyase operon	0	0.09	0	0.09	0.09	0.09	0	0.09	0.09	0	0.09	0	0.09	0	0.09	0.09	0.09	0.09	0	0.09	0.09	0.09	0.09	0.09	0	0	0	0	0	0.09	0.09	0.9	0	0	0	0.09	0.09	0.09	0.09	0.09	0.09	0.09	0	0.09	0	0.09	0.09	0.09
Phosphonate and phosphinate metabolism	C-P lyase cleavage PhnJ	0	0	0	0	0	0	0	0	0	0	0	0	0	0	0	0	0	0	0	0	0	0	0	0	0	0	0	0	0	0	0	1	0	0	0	0	0	0	0	0	0	0	0	0	0	0	0	0
Phosphonate and phosphinate metabolism	CP-lyase complex	0	0	0	0	0	0	0	0	0	0	0	0	0	0	0	0	0	0	0	0	0	0	0	0	0	0	0	0	0	0	0	1	0	0	0	0	0	0	0	0	0	0	0	0	0	0	0	0
Photosynthesis	Retinal biosynthesis	0.25	0.5	0	0.5	0.25	0.75	0.5	0	0.25	0	0.5	0	0.25	0	0.25	0	0.25	0	0.25	0	0.25	0.5	0.5	0.5	0	0.75	0.25	0	0.75	0	0.25	0.25	0	0	0.25	0.5	0	0	0	0.5	0.25	0.5	0.25	0.25	0.25	0.5	0	0.5
Photosynthesis	Cytochrome b6/f complex	0.125	0	0.125	0.125	0	0	0	0.125	0	0	0.125	0	0	0	0	0	0	0	0	0.25	0	0.25	0	0.125	0.125	0	0	0	0.125	0	0.125	0	0	0.125	0.125	0	0	0	0	0	0.25	0.25	0	0.25	0	0.125	0	0
Photosynthesis	Photosystem II	0	0	0	0	0	0	0	0	0	0	0	0	0	0	0	0	0	0	0	0	0	0	0	0	0	0	0	0	0	0	0	0	0	0	0	0	0	0	0	0	0	0	0	0	0	0	0	0
Photosynthesis	anoxygenic type-II reaction center	0	0	0	0	0	0	0	0	0	0	0	0	0	0	0	0	0	0	0	0	0	0	0	0	0	0	0	0	0	0	0	0	0	0	0	0	0	0	0	0	0	0	0	0	0	0	0	0
Photosynthesis	Photosystem I	0	0	0	0	0	0	0	0	0	0	0	0	0	0	0	0	0	0	0	0	0	0	0	0	0	0	0	0	0	0	0	0	0	0	0	0	0	0	0	0	0	0	0	0	0	0	0	0
Polycyclic aromatic hydrocarbon degradation	starch/glycogen synthesis	0.99	0.99	0.99	0.99	0.99	0.99	0.66	0.99	0.99	0	0.66	0.99	0.66	0.66	0	0	0.99	0	0.66	0.99	0.99	0.99	0.33	0.99	0.99	0.99	0.33	0.66	0.33	0.99	0.99	0.99	0.66	0.99	0.99	0.99	0.66	0.99	0	0.66	0.99	0.99	0.66	0.99	0	0.66	0.99	0.66
Starch and sucrose metabolism	starch/glycogen degradation	1	1	1	1	1	1	1	1	1	0	1	1	1	1	0	0	1	0	1	1	1	1	0	1	1	1	0	1	1	1	1	1	1	1	1	1	1	1	1	1	1	1	1	1	0	1	1	1
Sulfur metabolism	sulfur assimilation	0	0	0	0	1	1	1	1	1	1	1	0	0	0	1	0	0	0	0	0	0	0	0	0	0	0	0	0	0	1	1	0	0	1	0	1	0	1	0	1	0	0	0	0	1	1	0	0
Sulfur metabolism	dissimilatory sulfate < > APS	0	0	0	0	0	0	0	0	0	0	1	0	0	1	1	0	0	0	0	1	0	1	0	1	0	0	0	0	0	0	1	0	0	1	0	0	0	0	0	1	1	0	0	0	1	1	1	0
Sulfur metabolism	sulfide oxidation	0	0	0	0	0	0	1	0	1	0	0	0	0	0	0	0	0	0	0	1	0	0	0	0	0	0	0	0	1	0	0	0	1	1	1	0	0	1	0	0	1	0	0	1	1	0	0	0
Sulfur metabolism	thiosulfate oxidation	0	0	0	0.16	0	0	0	0	0	0	0	0	0	0	0.96	0	0	0	0	0	0	0	0	0	0	0	0	0	0	0	0	0	0	0	0	0	0.16	0	0	0	0	0	0	0	0.16	0	0	0
Sulfur metabolism	alt thiosulfate oxidation tsdA	0	0	0	0	0	1	0	0	1	0	0	0	0	0	0	0	0	0	0	0	0	0	1	0	0	1	0	0	0	0	0	0	0	0	1	0	0	1	0	1	0	0	0	1	0	0	0	0
Sulfur metabolism	sulfur dioxygenase	0	0	0	0	0	0	0	0	0	0	0	1	0	1	1	1	0	0	0	0	0	0	0	0	0	0	0	0	0	0	0	1	0	1	0	0	0	0	1	0	0	0	0	0	0	0	0	0
Sulfur metabolism	sulfite dehydrogenase (quinone)	0	0	0	0	0	0	0	0	0	0.99	0	0	0	0	0	0	0	0	0	0	0	0	0	0	0	0	0	0	0	0	0	0	0	0	0	0	0	0	0	0	0	0	0	0	0.99	0	0	0
Sulfur metabolism	sulfite dehydrogenase	0	0	0	0	0	0	0	0	0	0	0	0	0	0	0	0	1	0	0	0	0	0	0	0	0	0	0	0	0	0	0	0	0	0	0	0	0	0	0	0	0	0	0	0	0	0	0	0
Sulfur metabolism	sulfhydrogenase	0	0	0	0	0	0	0	0	0	0	0	0	0	0	0	0	0	0	0	0	0	0	0	0	0	0	0	0	0.75	0	0	0	0.5	0	0	0	0	0	0	0	0	0	0	0	0	0	0	0
Sulfur metabolism	dissimilatory sulfite < > APS	0	0	0	0	0	0	0	0	0	0	0	0	0	0	0	0	0	0	0	0	0	0	0	0	0	0	0	0	0	0	0	0	0	0	0	0	0	0	0	0	0	0	0	0	0	0	0	0
Sulfur metabolism	DMSO reductase	0	0	0	0	0	0	0	0	0	0	0	0	0	0	0	0	0	0	0	0	0	0	0	0	0	0	0	0	0	0	0	0	0	0	0	0	0	0	0	0	0	0	0	0	0	0.33	0	0
Sulfur metabolism	thiosulfate/polysulfide reductase	0	0	0	0	0	0	0	0	0	0	0	0.33	0	0	0	0	0	0	0	0	0	0	0	0	0	0	0	0	0	0	0	0	0	0	0	0	0	0	0	0	0	0	0	0	0	0	0	0
Terpenoid backbone biosynthesis	MEP-DOXP pathway	0.852	0.71	0.71	0.852	0.568	0.568	0.852	0.852	0.71	0.994	0.852	0.994	0.71	0.852	0.852	0.852	0.71	0.71	0.71	0.852	0.852	0.994	0	0.71	0.71	0.568	0.71	0.568	0.994	0.71	0.852	0.71	0.71	0.994	0.71	0.852	0.994	0.852	0.568	0.71	0.852	0.852	0.852	0.852	0.852	0.994	0.852	0.71
Terpenoid backbone biosynthesis	mevalonate pathway	0	0	0	0	0	0	0	0	0	0	0	0	0	0	0	0	0	0	0	0	0	0	0.4	0	0	0	0	0	0	0.2	0	0	0	0	0	0	0	0	0	0	0	0	0	0	0	0	0	0
Transporters	transporter: phosphate	1	1	1	0	1	0.25	1	1	0.25	1	1	1	1	1	1	0	0.75	0.25	1	0	0	0	0.25	1	1	0.25	1	0.25	1	1	1	1	1	1	1	1	1	1	1	1	0	1	1	0	1	1	0	1
Transporters	transporter: urea	0	0	0	1	0	0	0	0	0	0	0	0	0	0	0	0	1	0	0	0	0	0	0	0	0	0	0	0	0	0	0	0.4	0	0	0	1	0	0	0	0	0	0	0	0	0	0.2	0	0
Transporters	transporter: phosphonate	0	0	0	0	0	0	0	0	0	0	0.33	0	0	0	0	0	0.33	0	0	0	0	0	0	0	0.33	0.33	0	0	0.99	0	0.33	0.99	0	0.99	0	0	0	0.33	0	0	0	0.33	0	0.33	0	0	0	0
Transporters	transporter: thiamin	0	0	0	0	0	0	0	0	0	0	0	0	0	0	0	0	0	0	0.66	0	0	0	0	0	0	0	0	0	0	0	0	0.66	0	0	0	0	0	0	0	0	0	0	0	0	0	0	0	0
Transporters	transporter: vitamin B12	0	0	0	0	0	0	0	0	0	0	0	0	0	0	0	0	0	0	0	0	0	0	0	0	0	0	0	0	0	0	0	0	0	0	0	0	0	0	0	0	0	0	0	0	0	0	0	0
Vitamins biosynthesis	thiamin biosynthesis	0.18	0.64	0.73	0.64	0.64	0.27	0.64	0.64	0.27	0.55	0.73	0.27	0.18	0.55	0.45	0.64	0.45	0.64	0.18	0.55	0.82	0.64	0.18	0.55	0.45	0.27	0.45	0.27	0.18	0.64	0.64	0.73	0.18	0.73	0.73	0.73	0.82	0.64	0.55	0.27	0.73	0.73	0.18	0.73	0.55	0.64	0.73	0.18
Vitamins biosynthesis	riboflavin biosynthesis	1	1	1	1	0.75	0.75	1	1	1	1	0.75	1	1	1	0.25	0.75	0.5	0	0	1	1	1	1	0.75	1	0.75	1	0.5	0	1	1	1	0	1	1	1	1	1	0.75	0.75	1	1	0	1	1	1	1	1
Vitamins biosynthesis	cobalamin biosynthesis	0.12	0.12	0.25	0.12	0.12	0.12	0.62	0.12	0.12	0.12	0	0.12	0.12	0.12	0.12	0.12	0.88	0.12	0.5	0.12	0.12	0.88	0.12	0	0.25	0	0.12	0.12	0.12	0.12	0.12	0.88	0.12	0.5	0.12	0.12	0.12	0.88	0.12	0.12	0.12	0.12	0.25	0.12	0.12	0.12	0.12	0.12
[truncated: 348 more columns]
