# Supplementary material for: A metabolic modeling-based framework for predicting trophic dependencies in native rhizobiomes of crop plants
Source: bioRxiv preprint, doi:10.1101/2023.12.11.571117, version 2 (2024-07-07)
Supplement: Sub-networks motifs data [file 571117_file10.xlsx]

## Sheet: GSMM_occurences
	Occurence_in_PM	Occurence_in_PMM_position_A	Occurence_in_PMM_position_B
GSMM_142	896	14500	6712
GSMM_344	890	8157	18018
GSMM_265	876	16682	9546
GSMM_122	857	4372	14024
GSMM_135	831	16071	9563
GSMM_017	814	1948	19738
GSMM_104	773	16603	7126
GSMM_365	759	4115	5268
GSMM_230	742	3559	9883
GSMM_232	730	30855	2755
GSMM_186	717	3538	5613
GSMM_323	695	2894	6955
GSMM_316	694	2760	10082
GSMM_382	682	3276	6493
GSMM_048	679	1942	6500
GSMM_241	675	2979	3106
GSMM_166	662	3488	4682
GSMM_176	643	1835	10940
GSMM_262	641	18465	2015
GSMM_016	640	1002	12337
GSMM_374	626	10985	4281
GSMM_126	626	9199	2920
GSMM_277	626	1779	7825
GSMM_256	625	3229	5071
GSMM_225	625	792	19430
GSMM_036	624	5932	3394
GSMM_354	623	8622	3115
GSMM_105	619	971	7986
GSMM_049	609	1612	14874
GSMM_051	609	3090	4795
GSMM_208	608	1038	13134
GSMM_392	604	11592	5022
GSMM_014	584	8329	2291
GSMM_127	573	18205	5525
GSMM_357	573	30904	1763
GSMM_024	570	881	10464
GSMM_093	556	8873	3843
GSMM_057	555	2390	3381
GSMM_351	545	33591	3720
GSMM_364	535	11500	4340
GSMM_306	527	50628	2763
GSMM_055	523	2209	4738
GSMM_282	523	11153	13837
GSMM_343	522	907	4288
GSMM_030	521	771	19411
GSMM_220	518	873	6711
GSMM_037	508	5816	1751
GSMM_005	504	26181	2657
GSMM_161	501	2415	4986
GSMM_269	500	12170	3582
GSMM_261	493	11739	3161
GSMM_091	490	719	6571
GSMM_047	489	1422	5347
GSMM_157	488	1514	5841
GSMM_239	480	15474	7255
GSMM_103	473	8070	11979
GSMM_243	472	1539	2228
GSMM_345	460	1994	2339
GSMM_160	458	549	18528
GSMM_063	451	10550	4621
GSMM_244	447	4559	4527
GSMM_029	446	1962	3128
GSMM_182	446	687	5106
GSMM_154	432	766	5153
GSMM_358	415	1115	10399
GSMM_159	414	3635	2311
GSMM_314	411	4310	6019
GSMM_069	410	9468	1684
GSMM_297	404	15803	1719
GSMM_076	403	1274	5255
GSMM_170	402	464	13003
GSMM_119	396	670	5168
GSMM_204	396	1099	4389
GSMM_259	388	3552	14595
GSMM_011	385	627	1388
GSMM_102	385	430	4689
GSMM_155	376	7730	2823
GSMM_280	374	564	3906
GSMM_311	360	6029	4766
GSMM_180	359	398	4495
GSMM_015	355	5460	14206
GSMM_110	311	888	6096
GSMM_384	273	420	7234
GSMM_380	272	447	8422

## Sheet: PMM_position_1_healthy
	exudate	GSMM1	metabolite1	GSMM2	metabolite2	class	class1	class2
1	EX_4hbz_e	GSMM_011	EX_acald_e	GSMM_103	EX_diact_e	('BjSA', 'Neutral')	BjSA	Neutral
4	EX_4hbz_e	GSMM_017	EX_acald_e	GSMM_103	EX_diact_e	('BjSA', 'Neutral')	BjSA	Neutral
10	EX_4hbz_e	GSMM_048	EX_acald_e	GSMM_103	EX_diact_e	('BjSA', 'Neutral')	BjSA	Neutral
18	EX_4hbz_e	GSMM_091	EX_acald_e	GSMM_103	EX_diact_e	('BjSA', 'Neutral')	BjSA	Neutral
22	EX_4hbz_e	GSMM_105	EX_acald_e	GSMM_103	EX_diact_e	('BjSA', 'Neutral')	BjSA	Neutral
28	EX_4hbz_e	GSMM_155	EX_acald_e	GSMM_103	EX_diact_e	('BjSA', 'Neutral')	BjSA	Neutral
30	EX_4hbz_e	GSMM_159	EX_acald_e	GSMM_103	EX_diact_e	('BjSA', 'Neutral')	BjSA	Neutral
33	EX_4hbz_e	GSMM_166	EX_acald_e	GSMM_103	EX_diact_e	('BjSA', 'Neutral')	BjSA	Neutral
34	EX_4hbz_e	GSMM_170	EX_acald_e	GSMM_103	EX_diact_e	('BjSA', 'Neutral')	BjSA	Neutral
37	EX_4hbz_e	GSMM_208	EX_acald_e	GSMM_103	EX_diact_e	('BjSA', 'Neutral')	BjSA	Neutral
42	EX_4hbz_e	GSMM_244	EX_acald_e	GSMM_103	EX_diact_e	('BjSA', 'Neutral')	BjSA	Neutral
50	EX_4hbz_e	GSMM_314	EX_acald_e	GSMM_103	EX_diact_e	('BjSA', 'Neutral')	BjSA	Neutral
62	EX_4hbz_e	GSMM_014	EX_5drib_e	GSMM_103	EX_diact_e	('BjSA', 'Neutral')	BjSA	Neutral
64	EX_4hbz_e	GSMM_017	EX_5drib_e	GSMM_103	EX_diact_e	('BjSA', 'Neutral')	BjSA	Neutral
68	EX_4hbz_e	GSMM_048	EX_5drib_e	GSMM_103	EX_diact_e	('BjSA', 'Neutral')	BjSA	Neutral
76	EX_4hbz_e	GSMM_091	EX_5drib_e	GSMM_103	EX_diact_e	('BjSA', 'Neutral')	BjSA	Neutral
80	EX_4hbz_e	GSMM_105	EX_5drib_e	GSMM_103	EX_diact_e	('BjSA', 'Neutral')	BjSA	Neutral
86	EX_4hbz_e	GSMM_155	EX_5drib_e	GSMM_103	EX_diact_e	('BjSA', 'Neutral')	BjSA	Neutral
87	EX_4hbz_e	GSMM_159	EX_5drib_e	GSMM_103	EX_diact_e	('BjSA', 'Neutral')	BjSA	Neutral
89	EX_4hbz_e	GSMM_166	EX_5drib_e	GSMM_103	EX_diact_e	('BjSA', 'Neutral')	BjSA	Neutral
90	EX_4hbz_e	GSMM_176	EX_5drib_e	GSMM_103	EX_diact_e	('BjSA', 'Neutral')	BjSA	Neutral
93	EX_4hbz_e	GSMM_208	EX_5drib_e	GSMM_103	EX_diact_e	('BjSA', 'Neutral')	BjSA	Neutral
98	EX_4hbz_e	GSMM_244	EX_5drib_e	GSMM_103	EX_diact_e	('BjSA', 'Neutral')	BjSA	Neutral
106	EX_4hbz_e	GSMM_314	EX_5drib_e	GSMM_103	EX_diact_e	('BjSA', 'Neutral')	BjSA	Neutral
112	EX_4hbz_e	GSMM_354	EX_5drib_e	GSMM_103	EX_diact_e	('BjSA', 'Neutral')	BjSA	Neutral
123	EX_4hbz_e	GSMM_048	EX_for_e	GSMM_103	EX_diact_e	('BjSA', 'Neutral')	BjSA	Neutral
131	EX_4hbz_e	GSMM_155	EX_for_e	GSMM_103	EX_diact_e	('BjSA', 'Neutral')	BjSA	Neutral
133	EX_4hbz_e	GSMM_176	EX_for_e	GSMM_103	EX_diact_e	('BjSA', 'Neutral')	BjSA	Neutral
145	EX_4hbz_e	GSMM_011	EX_etoh_e	GSMM_103	EX_diact_e	('BjSA', 'Neutral')	BjSA	Neutral
146	EX_4hbz_e	GSMM_014	EX_etoh_e	GSMM_103	EX_diact_e	('BjSA', 'Neutral')	BjSA	Neutral
149	EX_4hbz_e	GSMM_017	EX_etoh_e	GSMM_103	EX_diact_e	('BjSA', 'Neutral')	BjSA	Neutral
155	EX_4hbz_e	GSMM_048	EX_etoh_e	GSMM_103	EX_diact_e	('BjSA', 'Neutral')	BjSA	Neutral
165	EX_4hbz_e	GSMM_105	EX_etoh_e	GSMM_103	EX_diact_e	('BjSA', 'Neutral')	BjSA	Neutral
172	EX_4hbz_e	GSMM_159	EX_etoh_e	GSMM_103	EX_diact_e	('BjSA', 'Neutral')	BjSA	Neutral
174	EX_4hbz_e	GSMM_166	EX_etoh_e	GSMM_103	EX_diact_e	('BjSA', 'Neutral')	BjSA	Neutral
175	EX_4hbz_e	GSMM_176	EX_etoh_e	GSMM_103	EX_diact_e	('BjSA', 'Neutral')	BjSA	Neutral
178	EX_4hbz_e	GSMM_208	EX_etoh_e	GSMM_103	EX_diact_e	('BjSA', 'Neutral')	BjSA	Neutral
183	EX_4hbz_e	GSMM_244	EX_etoh_e	GSMM_103	EX_diact_e	('BjSA', 'Neutral')	BjSA	Neutral
196	EX_4hbz_e	GSMM_354	EX_etoh_e	GSMM_103	EX_diact_e	('BjSA', 'Neutral')	BjSA	Neutral
205	EX_4hbz_e	GSMM_011	EX_glyc3p_e	GSMM_103	EX_diact_e	('BjSA', 'Neutral')	BjSA	Neutral
206	EX_4hbz_e	GSMM_014	EX_glyc3p_e	GSMM_103	EX_diact_e	('BjSA', 'Neutral')	BjSA	Neutral
208	EX_4hbz_e	GSMM_017	EX_glyc3p_e	GSMM_103	EX_diact_e	('BjSA', 'Neutral')	BjSA	Neutral
213	EX_4hbz_e	GSMM_105	EX_glyc3p_e	GSMM_103	EX_diact_e	('BjSA', 'Neutral')	BjSA	Neutral
217	EX_4hbz_e	GSMM_155	EX_glyc3p_e	GSMM_103	EX_diact_e	('BjSA', 'Neutral')	BjSA	Neutral
219	EX_4hbz_e	GSMM_176	EX_glyc3p_e	GSMM_103	EX_diact_e	('BjSA', 'Neutral')	BjSA	Neutral
221	EX_4hbz_e	GSMM_208	EX_glyc3p_e	GSMM_103	EX_diact_e	('BjSA', 'Neutral')	BjSA	Neutral
234	EX_4hbz_e	GSMM_354	EX_glyc3p_e	GSMM_103	EX_diact_e	('BjSA', 'Neutral')	BjSA	Neutral
240	EX_4hbz_e	GSMM_048	EX_istfrnA_e	GSMM_103	EX_diact_e	('BjSA', 'Neutral')	BjSA	Neutral
244	EX_4hbz_e	GSMM_091	EX_istfrnA_e	GSMM_103	EX_diact_e	('BjSA', 'Neutral')	BjSA	Neutral
245	EX_4hbz_e	GSMM_105	EX_istfrnA_e	GSMM_103	EX_diact_e	('BjSA', 'Neutral')	BjSA	Neutral
250	EX_4hbz_e	GSMM_159	EX_istfrnA_e	GSMM_103	EX_diact_e	('BjSA', 'Neutral')	BjSA	Neutral
251	EX_4hbz_e	GSMM_170	EX_istfrnA_e	GSMM_103	EX_diact_e	('BjSA', 'Neutral')	BjSA	Neutral
260	EX_4hbz_e	GSMM_354	EX_istfrnA_e	GSMM_103	EX_diact_e	('BjSA', 'Neutral')	BjSA	Neutral
265	EX_4hbz_e	GSMM_011	EX_fald_e	GSMM_103	EX_diact_e	('BjSA', 'Neutral')	BjSA	Neutral
266	EX_4hbz_e	GSMM_014	EX_fald_e	GSMM_103	EX_diact_e	('BjSA', 'Neutral')	BjSA	Neutral
269	EX_4hbz_e	GSMM_017	EX_fald_e	GSMM_103	EX_diact_e	('BjSA', 'Neutral')	BjSA	Neutral
275	EX_4hbz_e	GSMM_048	EX_fald_e	GSMM_103	EX_diact_e	('BjSA', 'Neutral')	BjSA	Neutral
283	EX_4hbz_e	GSMM_091	EX_fald_e	GSMM_103	EX_diact_e	('BjSA', 'Neutral')	BjSA	Neutral
286	EX_4hbz_e	GSMM_105	EX_fald_e	GSMM_103	EX_diact_e	('BjSA', 'Neutral')	BjSA	Neutral
293	EX_4hbz_e	GSMM_159	EX_fald_e	GSMM_103	EX_diact_e	('BjSA', 'Neutral')	BjSA	Neutral
295	EX_4hbz_e	GSMM_166	EX_fald_e	GSMM_103	EX_diact_e	('BjSA', 'Neutral')	BjSA	Neutral
296	EX_4hbz_e	GSMM_170	EX_fald_e	GSMM_103	EX_diact_e	('BjSA', 'Neutral')	BjSA	Neutral
297	EX_4hbz_e	GSMM_176	EX_fald_e	GSMM_103	EX_diact_e	('BjSA', 'Neutral')	BjSA	Neutral
300	EX_4hbz_e	GSMM_208	EX_fald_e	GSMM_103	EX_diact_e	('BjSA', 'Neutral')	BjSA	Neutral
305	EX_4hbz_e	GSMM_244	EX_fald_e	GSMM_103	EX_diact_e	('BjSA', 'Neutral')	BjSA	Neutral
314	EX_4hbz_e	GSMM_314	EX_fald_e	GSMM_103	EX_diact_e	('BjSA', 'Neutral')	BjSA	Neutral
321	EX_4hbz_e	GSMM_354	EX_fald_e	GSMM_103	EX_diact_e	('BjSA', 'Neutral')	BjSA	Neutral
330	EX_4hbz_e	GSMM_011	EX_ptrc_e	GSMM_103	EX_diact_e	('BjSA', 'Neutral')	BjSA	Neutral
336	EX_4hbz_e	GSMM_048	EX_ptrc_e	GSMM_103	EX_diact_e	('BjSA', 'Neutral')	BjSA	Neutral
344	EX_4hbz_e	GSMM_105	EX_ptrc_e	GSMM_103	EX_diact_e	('BjSA', 'Neutral')	BjSA	Neutral
348	EX_4hbz_e	GSMM_155	EX_ptrc_e	GSMM_103	EX_diact_e	('BjSA', 'Neutral')	BjSA	Neutral
350	EX_4hbz_e	GSMM_159	EX_ptrc_e	GSMM_103	EX_diact_e	('BjSA', 'Neutral')	BjSA	Neutral
352	EX_4hbz_e	GSMM_166	EX_ptrc_e	GSMM_103	EX_diact_e	('BjSA', 'Neutral')	BjSA	Neutral
353	EX_4hbz_e	GSMM_176	EX_ptrc_e	GSMM_103	EX_diact_e	('BjSA', 'Neutral')	BjSA	Neutral
356	EX_4hbz_e	GSMM_208	EX_ptrc_e	GSMM_103	EX_diact_e	('BjSA', 'Neutral')	BjSA	Neutral
360	EX_4hbz_e	GSMM_244	EX_ptrc_e	GSMM_103	EX_diact_e	('BjSA', 'Neutral')	BjSA	Neutral
366	EX_4hbz_e	GSMM_314	EX_ptrc_e	GSMM_103	EX_diact_e	('BjSA', 'Neutral')	BjSA	Neutral
372	EX_4hbz_e	GSMM_354	EX_ptrc_e	GSMM_103	EX_diact_e	('BjSA', 'Neutral')	BjSA	Neutral
379	EX_4hbz_e	GSMM_011	EX_rib__D_e	GSMM_103	EX_diact_e	('BjSA', 'Neutral')	BjSA	Neutral
380	EX_4hbz_e	GSMM_014	EX_rib__D_e	GSMM_103	EX_diact_e	('BjSA', 'Neutral')	BjSA	Neutral
386	EX_4hbz_e	GSMM_048	EX_rib__D_e	GSMM_103	EX_diact_e	('BjSA', 'Neutral')	BjSA	Neutral
391	EX_4hbz_e	GSMM_091	EX_rib__D_e	GSMM_103	EX_diact_e	('BjSA', 'Neutral')	BjSA	Neutral
400	EX_4hbz_e	GSMM_170	EX_rib__D_e	GSMM_103	EX_diact_e	('BjSA', 'Neutral')	BjSA	Neutral
401	EX_4hbz_e	GSMM_176	EX_rib__D_e	GSMM_103	EX_diact_e	('BjSA', 'Neutral')	BjSA	Neutral
404	EX_4hbz_e	GSMM_208	EX_rib__D_e	GSMM_103	EX_diact_e	('BjSA', 'Neutral')	BjSA	Neutral
415	EX_4hbz_e	GSMM_314	EX_rib__D_e	GSMM_103	EX_diact_e	('BjSA', 'Neutral')	BjSA	Neutral
422	EX_4hbz_e	GSMM_354	EX_rib__D_e	GSMM_103	EX_diact_e	('BjSA', 'Neutral')	BjSA	Neutral
430	EX_4hbz_e	GSMM_014	EX_actn__R_e	GSMM_103	EX_diact_e	('BjSA', 'Neutral')	BjSA	Neutral
438	EX_4hbz_e	GSMM_091	EX_actn__R_e	GSMM_103	EX_diact_e	('BjSA', 'Neutral')	BjSA	Neutral
440	EX_4hbz_e	GSMM_105	EX_actn__R_e	GSMM_103	EX_diact_e	('BjSA', 'Neutral')	BjSA	Neutral
442	EX_4hbz_e	GSMM_155	EX_actn__R_e	GSMM_103	EX_diact_e	('BjSA', 'Neutral')	BjSA	Neutral
443	EX_4hbz_e	GSMM_166	EX_actn__R_e	GSMM_103	EX_diact_e	('BjSA', 'Neutral')	BjSA	Neutral
444	EX_4hbz_e	GSMM_176	EX_actn__R_e	GSMM_103	EX_diact_e	('BjSA', 'Neutral')	BjSA	Neutral
452	EX_4hbz_e	GSMM_354	EX_actn__R_e	GSMM_103	EX_diact_e	('BjSA', 'Neutral')	BjSA	Neutral
458	EX_4hbz_e	GSMM_014	EX_spmd_e	GSMM_103	EX_diact_e	('BjSA', 'Neutral')	BjSA	Neutral
461	EX_4hbz_e	GSMM_017	EX_spmd_e	GSMM_103	EX_diact_e	('BjSA', 'Neutral')	BjSA	Neutral
465	EX_4hbz_e	GSMM_048	EX_spmd_e	GSMM_103	EX_diact_e	('BjSA', 'Neutral')	BjSA	Neutral
472	EX_4hbz_e	GSMM_091	EX_spmd_e	GSMM_103	EX_diact_e	('BjSA', 'Neutral')	BjSA	Neutral
475	EX_4hbz_e	GSMM_105	EX_spmd_e	GSMM_103	EX_diact_e	('BjSA', 'Neutral')	BjSA	Neutral
481	EX_4hbz_e	GSMM_159	EX_spmd_e	GSMM_103	EX_diact_e	('BjSA', 'Neutral')	BjSA	Neutral
484	EX_4hbz_e	GSMM_166	EX_spmd_e	GSMM_103	EX_diact_e	('BjSA', 'Neutral')	BjSA	Neutral
485	EX_4hbz_e	GSMM_170	EX_spmd_e	GSMM_103	EX_diact_e	('BjSA', 'Neutral')	BjSA	Neutral
487	EX_4hbz_e	GSMM_208	EX_spmd_e	GSMM_103	EX_diact_e	('BjSA', 'Neutral')	BjSA	Neutral
496	EX_4hbz_e	GSMM_314	EX_spmd_e	GSMM_103	EX_diact_e	('BjSA', 'Neutral')	BjSA	Neutral
500	EX_4hbz_e	GSMM_354	EX_spmd_e	GSMM_103	EX_diact_e	('BjSA', 'Neutral')	BjSA	Neutral
507	EX_4hbz_e	GSMM_011	EX_glyc_e	GSMM_103	EX_diact_e	('BjSA', 'Neutral')	BjSA	Neutral
508	EX_4hbz_e	GSMM_014	EX_glyc_e	GSMM_103	EX_diact_e	('BjSA', 'Neutral')	BjSA	Neutral
511	EX_4hbz_e	GSMM_017	EX_glyc_e	GSMM_103	EX_diact_e	('BjSA', 'Neutral')	BjSA	Neutral
517	EX_4hbz_e	GSMM_048	EX_glyc_e	GSMM_103	EX_diact_e	('BjSA', 'Neutral')	BjSA	Neutral
524	EX_4hbz_e	GSMM_091	EX_glyc_e	GSMM_103	EX_diact_e	('BjSA', 'Neutral')	BjSA	Neutral
528	EX_4hbz_e	GSMM_105	EX_glyc_e	GSMM_103	EX_diact_e	('BjSA', 'Neutral')	BjSA	Neutral
533	EX_4hbz_e	GSMM_155	EX_glyc_e	GSMM_103	EX_diact_e	('BjSA', 'Neutral')	BjSA	Neutral
535	EX_4hbz_e	GSMM_159	EX_glyc_e	GSMM_103	EX_diact_e	('BjSA', 'Neutral')	BjSA	Neutral
538	EX_4hbz_e	GSMM_166	EX_glyc_e	GSMM_103	EX_diact_e	('BjSA', 'Neutral')	BjSA	Neutral
539	EX_4hbz_e	GSMM_176	EX_glyc_e	GSMM_103	EX_diact_e	('BjSA', 'Neutral')	BjSA	Neutral
542	EX_4hbz_e	GSMM_208	EX_glyc_e	GSMM_103	EX_diact_e	('BjSA', 'Neutral')	BjSA	Neutral
547	EX_4hbz_e	GSMM_244	EX_glyc_e	GSMM_103	EX_diact_e	('BjSA', 'Neutral')	BjSA	Neutral
555	EX_4hbz_e	GSMM_314	EX_glyc_e	GSMM_103	EX_diact_e	('BjSA', 'Neutral')	BjSA	Neutral
562	EX_4hbz_e	GSMM_354	EX_glyc_e	GSMM_103	EX_diact_e	('BjSA', 'Neutral')	BjSA	Neutral
571	EX_4hbz_e	GSMM_011	EX_fe3pyovd_kt_e	GSMM_103	EX_diact_e	('BjSA', 'Neutral')	BjSA	Neutral
572	EX_4hbz_e	GSMM_014	EX_fe3pyovd_kt_e	GSMM_103	EX_diact_e	('BjSA', 'Neutral')	BjSA	Neutral
575	EX_4hbz_e	GSMM_017	EX_fe3pyovd_kt_e	GSMM_103	EX_diact_e	('BjSA', 'Neutral')	BjSA	Neutral
581	EX_4hbz_e	GSMM_048	EX_fe3pyovd_kt_e	GSMM_103	EX_diact_e	('BjSA', 'Neutral')	BjSA	Neutral
589	EX_4hbz_e	GSMM_091	EX_fe3pyovd_kt_e	GSMM_103	EX_diact_e	('BjSA', 'Neutral')	BjSA	Neutral
593	EX_4hbz_e	GSMM_105	EX_fe3pyovd_kt_e	GSMM_103	EX_diact_e	('BjSA', 'Neutral')	BjSA	Neutral
599	EX_4hbz_e	GSMM_155	EX_fe3pyovd_kt_e	GSMM_103	EX_diact_e	('BjSA', 'Neutral')	BjSA	Neutral
601	EX_4hbz_e	GSMM_159	EX_fe3pyovd_kt_e	GSMM_103	EX_diact_e	('BjSA', 'Neutral')	BjSA	Neutral
604	EX_4hbz_e	GSMM_166	EX_fe3pyovd_kt_e	GSMM_103	EX_diact_e	('BjSA', 'Neutral')	BjSA	Neutral
605	EX_4hbz_e	GSMM_170	EX_fe3pyovd_kt_e	GSMM_103	EX_diact_e	('BjSA', 'Neutral')	BjSA	Neutral
606	EX_4hbz_e	GSMM_176	EX_fe3pyovd_kt_e	GSMM_103	EX_diact_e	('BjSA', 'Neutral')	BjSA	Neutral
609	EX_4hbz_e	GSMM_208	EX_fe3pyovd_kt_e	GSMM_103	EX_diact_e	('BjSA', 'Neutral')	BjSA	Neutral
614	EX_4hbz_e	GSMM_244	EX_fe3pyovd_kt_e	GSMM_103	EX_diact_e	('BjSA', 'Neutral')	BjSA	Neutral
623	EX_4hbz_e	GSMM_314	EX_fe3pyovd_kt_e	GSMM_103	EX_diact_e	('BjSA', 'Neutral')	BjSA	Neutral
630	EX_4hbz_e	GSMM_354	EX_fe3pyovd_kt_e	GSMM_103	EX_diact_e	('BjSA', 'Neutral')	BjSA	Neutral
639	EX_4hbz_e	GSMM_011	EX_pyovd_kt_e	GSMM_103	EX_diact_e	('BjSA', 'Neutral')	BjSA	Neutral
640	EX_4hbz_e	GSMM_014	EX_pyovd_kt_e	GSMM_103	EX_diact_e	('BjSA', 'Neutral')	BjSA	Neutral
643	EX_4hbz_e	GSMM_017	EX_pyovd_kt_e	GSMM_103	EX_diact_e	('BjSA', 'Neutral')	BjSA	Neutral
649	EX_4hbz_e	GSMM_048	EX_pyovd_kt_e	GSMM_103	EX_diact_e	('BjSA', 'Neutral')	BjSA	Neutral
657	EX_4hbz_e	GSMM_091	EX_pyovd_kt_e	GSMM_103	EX_diact_e	('BjSA', 'Neutral')	BjSA	Neutral
661	EX_4hbz_e	GSMM_105	EX_pyovd_kt_e	GSMM_103	EX_diact_e	('BjSA', 'Neutral')	BjSA	Neutral
667	EX_4hbz_e	GSMM_155	EX_pyovd_kt_e	GSMM_103	EX_diact_e	('BjSA', 'Neutral')	BjSA	Neutral
669	EX_4hbz_e	GSMM_159	EX_pyovd_kt_e	GSMM_103	EX_diact_e	('BjSA', 'Neutral')	BjSA	Neutral
672	EX_4hbz_e	GSMM_166	EX_pyovd_kt_e	GSMM_103	EX_diact_e	('BjSA', 'Neutral')	BjSA	Neutral
673	EX_4hbz_e	GSMM_170	EX_pyovd_kt_e	GSMM_103	EX_diact_e	('BjSA', 'Neutral')	BjSA	Neutral
674	EX_4hbz_e	GSMM_176	EX_pyovd_kt_e	GSMM_103	EX_diact_e	('BjSA', 'Neutral')	BjSA	Neutral
677	EX_4hbz_e	GSMM_208	EX_pyovd_kt_e	GSMM_103	EX_diact_e	('BjSA', 'Neutral')	BjSA	Neutral
682	EX_4hbz_e	GSMM_244	EX_pyovd_kt_e	GSMM_103	EX_diact_e	('BjSA', 'Neutral')	BjSA	Neutral
691	EX_4hbz_e	GSMM_314	EX_pyovd_kt_e	GSMM_103	EX_diact_e	('BjSA', 'Neutral')	BjSA	Neutral
698	EX_4hbz_e	GSMM_354	EX_pyovd_kt_e	GSMM_103	EX_diact_e	('BjSA', 'Neutral')	BjSA	Neutral
707	EX_4hbz_e	GSMM_017	EX_cellb_e	GSMM_103	EX_diact_e	('BjSA', 'Neutral')	BjSA	Neutral
710	EX_4hbz_e	GSMM_105	EX_cellb_e	GSMM_103	EX_diact_e	('BjSA', 'Neutral')	BjSA	Neutral
711	EX_4hbz_e	GSMM_155	EX_cellb_e	GSMM_103	EX_diact_e	('BjSA', 'Neutral')	BjSA	Neutral
712	EX_4hbz_e	GSMM_159	EX_cellb_e	GSMM_103	EX_diact_e	('BjSA', 'Neutral')	BjSA	Neutral
715	EX_4hbz_e	GSMM_017	EX_lac__L_e	GSMM_103	EX_diact_e	('BjSA', 'Neutral')	BjSA	Neutral
724	EX_4hbz_e	GSMM_166	EX_lac__L_e	GSMM_103	EX_diact_e	('BjSA', 'Neutral')	BjSA	Neutral
725	EX_4hbz_e	GSMM_170	EX_lac__L_e	GSMM_103	EX_diact_e	('BjSA', 'Neutral')	BjSA	Neutral
740	EX_4hbz_e	GSMM_011	EX_oxa_e	GSMM_103	EX_diact_e	('BjSA', 'Neutral')	BjSA	Neutral
744	EX_4hbz_e	GSMM_048	EX_oxa_e	GSMM_103	EX_diact_e	('BjSA', 'Neutral')	BjSA	Neutral
751	EX_4hbz_e	GSMM_105	EX_oxa_e	GSMM_103	EX_diact_e	('BjSA', 'Neutral')	BjSA	Neutral
757	EX_4hbz_e	GSMM_166	EX_oxa_e	GSMM_103	EX_diact_e	('BjSA', 'Neutral')	BjSA	Neutral
759	EX_4hbz_e	GSMM_208	EX_oxa_e	GSMM_103	EX_diact_e	('BjSA', 'Neutral')	BjSA	Neutral
768	EX_4hbz_e	GSMM_354	EX_oxa_e	GSMM_103	EX_diact_e	('BjSA', 'Neutral')	BjSA	Neutral
773	EX_4hbz_e	GSMM_011	EX_anhgm_e	GSMM_103	EX_diact_e	('BjSA', 'Neutral')	BjSA	Neutral
775	EX_4hbz_e	GSMM_017	EX_anhgm_e	GSMM_103	EX_diact_e	('BjSA', 'Neutral')	BjSA	Neutral
779	EX_4hbz_e	GSMM_048	EX_anhgm_e	GSMM_103	EX_diact_e	('BjSA', 'Neutral')	BjSA	Neutral
781	EX_4hbz_e	GSMM_091	EX_anhgm_e	GSMM_103	EX_diact_e	('BjSA', 'Neutral')	BjSA	Neutral
788	EX_4hbz_e	GSMM_170	EX_anhgm_e	GSMM_103	EX_diact_e	('BjSA', 'Neutral')	BjSA	Neutral
789	EX_4hbz_e	GSMM_176	EX_anhgm_e	GSMM_103	EX_diact_e	('BjSA', 'Neutral')	BjSA	Neutral
791	EX_4hbz_e	GSMM_208	EX_anhgm_e	GSMM_103	EX_diact_e	('BjSA', 'Neutral')	BjSA	Neutral
794	EX_4hbz_e	GSMM_244	EX_anhgm_e	GSMM_103	EX_diact_e	('BjSA', 'Neutral')	BjSA	Neutral
810	EX_4hbz_e	GSMM_011	EX_urea_e	GSMM_103	EX_diact_e	('BjSA', 'Neutral')	BjSA	Neutral
811	EX_4hbz_e	GSMM_014	EX_urea_e	GSMM_103	EX_diact_e	('BjSA', 'Neutral')	BjSA	Neutral
819	EX_4hbz_e	GSMM_048	EX_urea_e	GSMM_103	EX_diact_e	('BjSA', 'Neutral')	BjSA	Neutral
825	EX_4hbz_e	GSMM_091	EX_urea_e	GSMM_103	EX_diact_e	('BjSA', 'Neutral')	BjSA	Neutral
829	EX_4hbz_e	GSMM_105	EX_urea_e	GSMM_103	EX_diact_e	('BjSA', 'Neutral')	BjSA	Neutral
836	EX_4hbz_e	GSMM_166	EX_urea_e	GSMM_103	EX_diact_e	('BjSA', 'Neutral')	BjSA	Neutral
837	EX_4hbz_e	GSMM_176	EX_urea_e	GSMM_103	EX_diact_e	('BjSA', 'Neutral')	BjSA	Neutral
842	EX_4hbz_e	GSMM_244	EX_urea_e	GSMM_103	EX_diact_e	('BjSA', 'Neutral')	BjSA	Neutral
851	EX_4hbz_e	GSMM_314	EX_urea_e	GSMM_103	EX_diact_e	('BjSA', 'Neutral')	BjSA	Neutral
857	EX_4hbz_e	GSMM_354	EX_urea_e	GSMM_103	EX_diact_e	('BjSA', 'Neutral')	BjSA	Neutral
865	EX_4hbz_e	GSMM_014	EX_inost_e	GSMM_103	EX_diact_e	('BjSA', 'Neutral')	BjSA	Neutral
868	EX_4hbz_e	GSMM_017	EX_inost_e	GSMM_103	EX_diact_e	('BjSA', 'Neutral')	BjSA	Neutral
870	EX_4hbz_e	GSMM_048	EX_inost_e	GSMM_103	EX_diact_e	('BjSA', 'Neutral')	BjSA	Neutral
875	EX_4hbz_e	GSMM_105	EX_inost_e	GSMM_103	EX_diact_e	('BjSA', 'Neutral')	BjSA	Neutral
878	EX_4hbz_e	GSMM_155	EX_inost_e	GSMM_103	EX_diact_e	('BjSA', 'Neutral')	BjSA	Neutral
881	EX_4hbz_e	GSMM_166	EX_inost_e	GSMM_103	EX_diact_e	('BjSA', 'Neutral')	BjSA	Neutral
882	EX_4hbz_e	GSMM_170	EX_inost_e	GSMM_103	EX_diact_e	('BjSA', 'Neutral')	BjSA	Neutral
883	EX_4hbz_e	GSMM_208	EX_inost_e	GSMM_103	EX_diact_e	('BjSA', 'Neutral')	BjSA	Neutral
888	EX_4hbz_e	GSMM_354	EX_inost_e	GSMM_103	EX_diact_e	('BjSA', 'Neutral')	BjSA	Neutral
891	EX_4hbz_e	GSMM_011	EX_chol_e	GSMM_103	EX_diact_e	('BjSA', 'Neutral')	BjSA	Neutral
892	EX_4hbz_e	GSMM_014	EX_chol_e	GSMM_103	EX_diact_e	('BjSA', 'Neutral')	BjSA	Neutral
894	EX_4hbz_e	GSMM_017	EX_chol_e	GSMM_103	EX_diact_e	('BjSA', 'Neutral')	BjSA	Neutral
900	EX_4hbz_e	GSMM_105	EX_chol_e	GSMM_103	EX_diact_e	('BjSA', 'Neutral')	BjSA	Neutral
903	EX_4hbz_e	GSMM_155	EX_chol_e	GSMM_103	EX_diact_e	('BjSA', 'Neutral')	BjSA	Neutral
905	EX_4hbz_e	GSMM_166	EX_chol_e	GSMM_103	EX_diact_e	('BjSA', 'Neutral')	BjSA	Neutral
907	EX_4hbz_e	GSMM_208	EX_chol_e	GSMM_103	EX_diact_e	('BjSA', 'Neutral')	BjSA	Neutral
922	EX_4hbz_e	GSMM_354	EX_chol_e	GSMM_103	EX_diact_e	('BjSA', 'Neutral')	BjSA	Neutral
929	EX_4hbz_e	GSMM_048	EX_stfrnA_e	GSMM_103	EX_diact_e	('BjSA', 'Neutral')	BjSA	Neutral
934	EX_4hbz_e	GSMM_091	EX_stfrnA_e	GSMM_103	EX_diact_e	('BjSA', 'Neutral')	BjSA	Neutral
935	EX_4hbz_e	GSMM_105	EX_stfrnA_e	GSMM_103	EX_diact_e	('BjSA', 'Neutral')	BjSA	Neutral
940	EX_4hbz_e	GSMM_159	EX_stfrnA_e	GSMM_103	EX_diact_e	('BjSA', 'Neutral')	BjSA	Neutral
941	EX_4hbz_e	GSMM_166	EX_stfrnA_e	GSMM_103	EX_diact_e	('BjSA', 'Neutral')	BjSA	Neutral
942	EX_4hbz_e	GSMM_170	EX_stfrnA_e	GSMM_103	EX_diact_e	('BjSA', 'Neutral')	BjSA	Neutral
953	EX_4hbz_e	GSMM_354	EX_stfrnA_e	GSMM_103	EX_diact_e	('BjSA', 'Neutral')	BjSA	Neutral
957	EX_4hbz_e	GSMM_011	EX_glyald_e	GSMM_103	EX_diact_e	('BjSA', 'Neutral')	BjSA	Neutral
962	EX_4hbz_e	GSMM_091	EX_glyald_e	GSMM_103	EX_diact_e	('BjSA', 'Neutral')	BjSA	Neutral
965	EX_4hbz_e	GSMM_105	EX_glyald_e	GSMM_103	EX_diact_e	('BjSA', 'Neutral')	BjSA	Neutral
968	EX_4hbz_e	GSMM_159	EX_glyald_e	GSMM_103	EX_diact_e	('BjSA', 'Neutral')	BjSA	Neutral
971	EX_4hbz_e	GSMM_166	EX_glyald_e	GSMM_103	EX_diact_e	('BjSA', 'Neutral')	BjSA	Neutral
972	EX_4hbz_e	GSMM_170	EX_glyald_e	GSMM_103	EX_diact_e	('BjSA', 'Neutral')	BjSA	Neutral
989	EX_4hbz_e	GSMM_011	EX_ura_e	GSMM_103	EX_diact_e	('BjSA', 'Neutral')	BjSA	Neutral
990	EX_4hbz_e	GSMM_017	EX_ura_e	GSMM_103	EX_diact_e	('BjSA', 'Neutral')	BjSA	Neutral
995	EX_4hbz_e	GSMM_048	EX_ura_e	GSMM_103	EX_diact_e	('BjSA', 'Neutral')	BjSA	Neutral
1000	EX_4hbz_e	GSMM_155	EX_ura_e	GSMM_103	EX_diact_e	('BjSA', 'Neutral')	BjSA	Neutral
1003	EX_4hbz_e	GSMM_170	EX_ura_e	GSMM_103	EX_diact_e	('BjSA', 'Neutral')	BjSA	Neutral
1004	EX_4hbz_e	GSMM_176	EX_ura_e	GSMM_103	EX_diact_e	('BjSA', 'Neutral')	BjSA	Neutral
1006	EX_4hbz_e	GSMM_244	EX_ura_e	GSMM_103	EX_diact_e	('BjSA', 'Neutral')	BjSA	Neutral
1010	EX_4hbz_e	GSMM_314	EX_ura_e	GSMM_103	EX_diact_e	('BjSA', 'Neutral')	BjSA	Neutral
1015	EX_4hbz_e	GSMM_011	EX_gal_e	GSMM_103	EX_diact_e	('BjSA', 'Neutral')	BjSA	Neutral
1016	EX_4hbz_e	GSMM_017	EX_gal_e	GSMM_103	EX_diact_e	('BjSA', 'Neutral')	BjSA	Neutral
1021	EX_4hbz_e	GSMM_048	EX_gal_e	GSMM_103	EX_diact_e	('BjSA', 'Neutral')	BjSA	Neutral
1026	EX_4hbz_e	GSMM_091	EX_gal_e	GSMM_103	EX_diact_e	('BjSA', 'Neutral')	BjSA	Neutral
1035	EX_4hbz_e	GSMM_170	EX_gal_e	GSMM_103	EX_diact_e	('BjSA', 'Neutral')	BjSA	Neutral
1036	EX_4hbz_e	GSMM_208	EX_gal_e	GSMM_103	EX_diact_e	('BjSA', 'Neutral')	BjSA	Neutral
1041	EX_4hbz_e	GSMM_244	EX_gal_e	GSMM_103	EX_diact_e	('BjSA', 'Neutral')	BjSA	Neutral
1051	EX_4hbz_e	GSMM_354	EX_gal_e	GSMM_103	EX_diact_e	('BjSA', 'Neutral')	BjSA	Neutral
1056	EX_4hbz_e	GSMM_011	EX_ala__D_e	GSMM_103	EX_diact_e	('BjSA', 'Neutral')	BjSA	Neutral
1059	EX_4hbz_e	GSMM_048	EX_ala__D_e	GSMM_103	EX_diact_e	('BjSA', 'Neutral')	BjSA	Neutral
1065	EX_4hbz_e	GSMM_105	EX_ala__D_e	GSMM_103	EX_diact_e	('BjSA', 'Neutral')	BjSA	Neutral
1068	EX_4hbz_e	GSMM_155	EX_ala__D_e	GSMM_103	EX_diact_e	('BjSA', 'Neutral')	BjSA	Neutral
1071	EX_4hbz_e	GSMM_176	EX_ala__D_e	GSMM_103	EX_diact_e	('BjSA', 'Neutral')	BjSA	Neutral
1076	EX_4hbz_e	GSMM_244	EX_ala__D_e	GSMM_103	EX_diact_e	('BjSA', 'Neutral')	BjSA	Neutral
1083	EX_4hbz_e	GSMM_314	EX_ala__D_e	GSMM_103	EX_diact_e	('BjSA', 'Neutral')	BjSA	Neutral
1087	EX_4hbz_e	GSMM_354	EX_ala__D_e	GSMM_103	EX_diact_e	('BjSA', 'Neutral')	BjSA	Neutral
1092	EX_4hbz_e	GSMM_011	EX_gua_e	GSMM_103	EX_diact_e	('BjSA', 'Neutral')	BjSA	Neutral
1093	EX_4hbz_e	GSMM_017	EX_gua_e	GSMM_103	EX_diact_e	('BjSA', 'Neutral')	BjSA	Neutral
1101	EX_4hbz_e	GSMM_170	EX_gua_e	GSMM_103	EX_diact_e	('BjSA', 'Neutral')	BjSA	Neutral
1111	EX_4hbz_e	GSMM_011	EX_asp__D_e	GSMM_103	EX_diact_e	('BjSA', 'Neutral')	BjSA	Neutral
1115	EX_4hbz_e	GSMM_159	EX_asp__D_e	GSMM_103	EX_diact_e	('BjSA', 'Neutral')	BjSA	Neutral
1118	EX_4hbz_e	GSMM_011	EX_ind3ac_e	GSMM_103	EX_diact_e	('BjSA', 'Neutral')	BjSA	Neutral
1119	EX_4hbz_e	GSMM_014	EX_ind3ac_e	GSMM_103	EX_diact_e	('BjSA', 'Neutral')	BjSA	Neutral
1122	EX_4hbz_e	GSMM_017	EX_ind3ac_e	GSMM_103	EX_diact_e	('BjSA', 'Neutral')	BjSA	Neutral
1127	EX_4hbz_e	GSMM_048	EX_ind3ac_e	GSMM_103	EX_diact_e	('BjSA', 'Neutral')	BjSA	Neutral
1135	EX_4hbz_e	GSMM_091	EX_ind3ac_e	GSMM_103	EX_diact_e	('BjSA', 'Neutral')	BjSA	Neutral
1138	EX_4hbz_e	GSMM_105	EX_ind3ac_e	GSMM_103	EX_diact_e	('BjSA', 'Neutral')	BjSA	Neutral
1144	EX_4hbz_e	GSMM_166	EX_ind3ac_e	GSMM_103	EX_diact_e	('BjSA', 'Neutral')	BjSA	Neutral
1145	EX_4hbz_e	GSMM_176	EX_ind3ac_e	GSMM_103	EX_diact_e	('BjSA', 'Neutral')	BjSA	Neutral
1147	EX_4hbz_e	GSMM_208	EX_ind3ac_e	GSMM_103	EX_diact_e	('BjSA', 'Neutral')	BjSA	Neutral
1151	EX_4hbz_e	GSMM_244	EX_ind3ac_e	GSMM_103	EX_diact_e	('BjSA', 'Neutral')	BjSA	Neutral
1159	EX_4hbz_e	GSMM_314	EX_ind3ac_e	GSMM_103	EX_diact_e	('BjSA', 'Neutral')	BjSA	Neutral
1166	EX_4hbz_e	GSMM_354	EX_ind3ac_e	GSMM_103	EX_diact_e	('BjSA', 'Neutral')	BjSA	Neutral
1172	EX_4hbz_e	GSMM_011	EX_meoh_e	GSMM_103	EX_diact_e	('BjSA', 'Neutral')	BjSA	Neutral
1177	EX_4hbz_e	GSMM_091	EX_meoh_e	GSMM_103	EX_diact_e	('BjSA', 'Neutral')	BjSA	Neutral
1183	EX_4hbz_e	GSMM_159	EX_meoh_e	GSMM_103	EX_diact_e	('BjSA', 'Neutral')	BjSA	Neutral
1185	EX_4hbz_e	GSMM_176	EX_meoh_e	GSMM_103	EX_diact_e	('BjSA', 'Neutral')	BjSA	Neutral
1187	EX_4hbz_e	GSMM_208	EX_meoh_e	GSMM_103	EX_diact_e	('BjSA', 'Neutral')	BjSA	Neutral
1201	EX_4hbz_e	GSMM_011	EX_orn_e	GSMM_103	EX_diact_e	('BjSA', 'Neutral')	BjSA	Neutral
1202	EX_4hbz_e	GSMM_014	EX_orn_e	GSMM_103	EX_diact_e	('BjSA', 'Neutral')	BjSA	Neutral
1212	EX_4hbz_e	GSMM_105	EX_orn_e	GSMM_103	EX_diact_e	('BjSA', 'Neutral')	BjSA	Neutral
1216	EX_4hbz_e	GSMM_155	EX_orn_e	GSMM_103	EX_diact_e	('BjSA', 'Neutral')	BjSA	Neutral
1219	EX_4hbz_e	GSMM_166	EX_orn_e	GSMM_103	EX_diact_e	('BjSA', 'Neutral')	BjSA	Neutral
1220	EX_4hbz_e	GSMM_176	EX_orn_e	GSMM_103	EX_diact_e	('BjSA', 'Neutral')	BjSA	Neutral
1230	EX_4hbz_e	GSMM_354	EX_orn_e	GSMM_103	EX_diact_e	('BjSA', 'Neutral')	BjSA	Neutral
1236	EX_4hbz_e	GSMM_014	EX_gthrd_e	GSMM_103	EX_diact_e	('BjSA', 'Neutral')	BjSA	Neutral
1245	EX_4hbz_e	GSMM_159	EX_gthrd_e	GSMM_103	EX_diact_e	('BjSA', 'Neutral')	BjSA	Neutral
1246	EX_4hbz_e	GSMM_166	EX_gthrd_e	GSMM_103	EX_diact_e	('BjSA', 'Neutral')	BjSA	Neutral
1255	EX_4hbz_e	GSMM_014	EX_pacald_e	GSMM_103	EX_diact_e	('BjSA', 'Neutral')	BjSA	Neutral
1257	EX_4hbz_e	GSMM_017	EX_pacald_e	GSMM_103	EX_diact_e	('BjSA', 'Neutral')	BjSA	Neutral
1258	EX_4hbz_e	GSMM_048	EX_pacald_e	GSMM_103	EX_diact_e	('BjSA', 'Neutral')	BjSA	Neutral
1260	EX_4hbz_e	GSMM_105	EX_pacald_e	GSMM_103	EX_diact_e	('BjSA', 'Neutral')	BjSA	Neutral
1261	EX_4hbz_e	GSMM_155	EX_pacald_e	GSMM_103	EX_diact_e	('BjSA', 'Neutral')	BjSA	Neutral
1262	EX_4hbz_e	GSMM_159	EX_pacald_e	GSMM_103	EX_diact_e	('BjSA', 'Neutral')	BjSA	Neutral
1264	EX_4hbz_e	GSMM_166	EX_pacald_e	GSMM_103	EX_diact_e	('BjSA', 'Neutral')	BjSA	Neutral
1269	EX_4hbz_e	GSMM_244	EX_pacald_e	GSMM_103	EX_diact_e	('BjSA', 'Neutral')	BjSA	Neutral
1272	EX_4hbz_e	GSMM_314	EX_pacald_e	GSMM_103	EX_diact_e	('BjSA', 'Neutral')	BjSA	Neutral
1277	EX_4hbz_e	GSMM_014	EX_pea_e	GSMM_103	EX_diact_e	('BjSA', 'Neutral')	BjSA	Neutral
1280	EX_4hbz_e	GSMM_048	EX_pea_e	GSMM_103	EX_diact_e	('BjSA', 'Neutral')	BjSA	Neutral
1285	EX_4hbz_e	GSMM_170	EX_pea_e	GSMM_103	EX_diact_e	('BjSA', 'Neutral')	BjSA	Neutral
1292	EX_4hbz_e	GSMM_014	EX_glu__L_e	GSMM_103	EX_diact_e	('BjSA', 'Neutral')	BjSA	Neutral
1300	EX_4hbz_e	GSMM_159	EX_glu__L_e	GSMM_103	EX_diact_e	('BjSA', 'Neutral')	BjSA	Neutral
1313	EX_4hbz_e	GSMM_014	EX_cgly_e	GSMM_103	EX_diact_e	('BjSA', 'Neutral')	BjSA	Neutral
1314	EX_4hbz_e	GSMM_017	EX_cgly_e	GSMM_103	EX_diact_e	('BjSA', 'Neutral')	BjSA	Neutral
1324	EX_4hbz_e	GSMM_159	EX_cgly_e	GSMM_103	EX_diact_e	('BjSA', 'Neutral')	BjSA	Neutral
1325	EX_4hbz_e	GSMM_166	EX_cgly_e	GSMM_103	EX_diact_e	('BjSA', 'Neutral')	BjSA	Neutral
1333	EX_4hbz_e	GSMM_314	EX_cgly_e	GSMM_103	EX_diact_e	('BjSA', 'Neutral')	BjSA	Neutral
1339	EX_4hbz_e	GSMM_014	EX_glc__D_e	GSMM_103	EX_diact_e	('BjSA', 'Neutral')	BjSA	Neutral
1349	EX_4hbz_e	GSMM_159	EX_glc__D_e	GSMM_103	EX_diact_e	('BjSA', 'Neutral')	BjSA	Neutral
1350	EX_4hbz_e	GSMM_166	EX_glc__D_e	GSMM_103	EX_diact_e	('BjSA', 'Neutral')	BjSA	Neutral
1351	EX_4hbz_e	GSMM_176	EX_glc__D_e	GSMM_103	EX_diact_e	('BjSA', 'Neutral')	BjSA	Neutral
1353	EX_4hbz_e	GSMM_208	EX_glc__D_e	GSMM_103	EX_diact_e	('BjSA', 'Neutral')	BjSA	Neutral
1356	EX_4hbz_e	GSMM_244	EX_glc__D_e	GSMM_103	EX_diact_e	('BjSA', 'Neutral')	BjSA	Neutral
1361	EX_4hbz_e	GSMM_314	EX_glc__D_e	GSMM_103	EX_diact_e	('BjSA', 'Neutral')	BjSA	Neutral
1366	EX_4hbz_e	GSMM_354	EX_glc__D_e	GSMM_103	EX_diact_e	('BjSA', 'Neutral')	BjSA	Neutral
1371	EX_4hbz_e	GSMM_014	EX_pheme_e	GSMM_103	EX_diact_e	('BjSA', 'Neutral')	BjSA	Neutral
1373	EX_4hbz_e	GSMM_017	EX_pheme_e	GSMM_103	EX_diact_e	('BjSA', 'Neutral')	BjSA	Neutral
1380	EX_4hbz_e	GSMM_091	EX_pheme_e	GSMM_103	EX_diact_e	('BjSA', 'Neutral')	BjSA	Neutral
1382	EX_4hbz_e	GSMM_105	EX_pheme_e	GSMM_103	EX_diact_e	('BjSA', 'Neutral')	BjSA	Neutral
1386	EX_4hbz_e	GSMM_166	EX_pheme_e	GSMM_103	EX_diact_e	('BjSA', 'Neutral')	BjSA	Neutral
1387	EX_4hbz_e	GSMM_176	EX_pheme_e	GSMM_103	EX_diact_e	('BjSA', 'Neutral')	BjSA	Neutral
1389	EX_4hbz_e	GSMM_208	EX_pheme_e	GSMM_103	EX_diact_e	('BjSA', 'Neutral')	BjSA	Neutral
1401	EX_4hbz_e	GSMM_017	EX_thym_e	GSMM_103	EX_diact_e	('BjSA', 'Neutral')	BjSA	Neutral
1406	EX_4hbz_e	GSMM_048	EX_thym_e	GSMM_103	EX_diact_e	('BjSA', 'Neutral')	BjSA	Neutral
1413	EX_4hbz_e	GSMM_155	EX_thym_e	GSMM_103	EX_diact_e	('BjSA', 'Neutral')	BjSA	Neutral
1414	EX_4hbz_e	GSMM_159	EX_thym_e	GSMM_103	EX_diact_e	('BjSA', 'Neutral')	BjSA	Neutral
1417	EX_4hbz_e	GSMM_170	EX_thym_e	GSMM_103	EX_diact_e	('BjSA', 'Neutral')	BjSA	Neutral
1429	EX_4hbz_e	GSMM_017	EX_glcr_e	GSMM_103	EX_diact_e	('BjSA', 'Neutral')	BjSA	Neutral
1434	EX_4hbz_e	GSMM_166	EX_glcr_e	GSMM_103	EX_diact_e	('BjSA', 'Neutral')	BjSA	Neutral
1435	EX_4hbz_e	GSMM_208	EX_glcr_e	GSMM_103	EX_diact_e	('BjSA', 'Neutral')	BjSA	Neutral
1439	EX_4hbz_e	GSMM_354	EX_glcr_e	GSMM_103	EX_diact_e	('BjSA', 'Neutral')	BjSA	Neutral
1443	EX_4hbz_e	GSMM_048	EX_glcn_e	GSMM_103	EX_diact_e	('BjSA', 'Neutral')	BjSA	Neutral
1451	EX_4hbz_e	GSMM_159	EX_glcn_e	GSMM_103	EX_diact_e	('BjSA', 'Neutral')	BjSA	Neutral
1453	EX_4hbz_e	GSMM_208	EX_glcn_e	GSMM_103	EX_diact_e	('BjSA', 'Neutral')	BjSA	Neutral
1458	EX_4hbz_e	GSMM_048	EX_enter_e	GSMM_103	EX_diact_e	('BjSA', 'Neutral')	BjSA	Neutral
1459	EX_4hbz_e	GSMM_091	EX_enter_e	GSMM_103	EX_diact_e	('BjSA', 'Neutral')	BjSA	Neutral
1462	EX_4hbz_e	GSMM_155	EX_enter_e	GSMM_103	EX_diact_e	('BjSA', 'Neutral')	BjSA	Neutral
1473	EX_4hbz_e	GSMM_244	EX_ocdcea_e	GSMM_103	EX_diact_e	('BjSA', 'Neutral')	BjSA	Neutral
1474	EX_4hbz_e	GSMM_314	EX_ocdcea_e	GSMM_103	EX_diact_e	('BjSA', 'Neutral')	BjSA	Neutral
1481	EX_4hbz_e	GSMM_105	EX_cell4_e	GSMM_103	EX_diact_e	('BjSA', 'Neutral')	BjSA	Neutral
1483	EX_4hbz_e	GSMM_155	EX_cell4_e	GSMM_103	EX_diact_e	('BjSA', 'Neutral')	BjSA	Neutral
1487	EX_4hbz_e	GSMM_314	EX_cell4_e	GSMM_103	EX_diact_e	('BjSA', 'Neutral')	BjSA	Neutral
1492	EX_4hbz_e	GSMM_017	EX_4abut_e	GSMM_103	EX_diact_e	('BjSA', 'Neutral')	BjSA	Neutral
1495	EX_4hbz_e	GSMM_105	EX_4abut_e	GSMM_103	EX_diact_e	('BjSA', 'Neutral')	BjSA	Neutral
1498	EX_4hbz_e	GSMM_208	EX_4abut_e	GSMM_103	EX_diact_e	('BjSA', 'Neutral')	BjSA	Neutral
1500	EX_4hbz_e	GSMM_244	EX_4abut_e	GSMM_103	EX_diact_e	('BjSA', 'Neutral')	BjSA	Neutral
1505	EX_4hbz_e	GSMM_017	EX_lys__L_e	GSMM_103	EX_diact_e	('BjSA', 'Neutral')	BjSA	Neutral
1510	EX_4hbz_e	GSMM_091	EX_lys__L_e	GSMM_103	EX_diact_e	('BjSA', 'Neutral')	BjSA	Neutral
1515	EX_4hbz_e	GSMM_159	EX_lys__L_e	GSMM_103	EX_diact_e	('BjSA', 'Neutral')	BjSA	Neutral
1520	EX_4hbz_e	GSMM_017	EX_indole_e	GSMM_103	EX_diact_e	('BjSA', 'Neutral')	BjSA	Neutral
1525	EX_4hbz_e	GSMM_091	EX_indole_e	GSMM_103	EX_diact_e	('BjSA', 'Neutral')	BjSA	Neutral
1531	EX_4hbz_e	GSMM_155	EX_indole_e	GSMM_103	EX_diact_e	('BjSA', 'Neutral')	BjSA	Neutral
1532	EX_4hbz_e	GSMM_159	EX_indole_e	GSMM_103	EX_diact_e	('BjSA', 'Neutral')	BjSA	Neutral
1534	EX_4hbz_e	GSMM_166	EX_indole_e	GSMM_103	EX_diact_e	('BjSA', 'Neutral')	BjSA	Neutral
1535	EX_4hbz_e	GSMM_208	EX_indole_e	GSMM_103	EX_diact_e	('BjSA', 'Neutral')	BjSA	Neutral
1544	EX_4hbz_e	GSMM_017	EX_thr__L_e	GSMM_103	EX_diact_e	('BjSA', 'Neutral')	BjSA	Neutral
1550	EX_4hbz_e	GSMM_017	EX_forglu_e	GSMM_103	EX_diact_e	('BjSA', 'Neutral')	BjSA	Neutral
1568	EX_4hbz_e	GSMM_354	EX_5dglcn_e	GSMM_103	EX_diact_e	('BjSA', 'Neutral')	BjSA	Neutral
1582	EX_4hbz_e	GSMM_105	EX_d23hb_e	GSMM_103	EX_diact_e	('BjSA', 'Neutral')	BjSA	Neutral
1584	EX_4hbz_e	GSMM_166	EX_d23hb_e	GSMM_103	EX_diact_e	('BjSA', 'Neutral')	BjSA	Neutral
1586	EX_4hbz_e	GSMM_208	EX_d23hb_e	GSMM_103	EX_diact_e	('BjSA', 'Neutral')	BjSA	Neutral
1607	EX_4hbz_e	GSMM_244	EX_leu__L_e	GSMM_103	EX_diact_e	('BjSA', 'Neutral')	BjSA	Neutral
1619	EX_4hbz_e	GSMM_091	EX_hxan_e	GSMM_103	EX_diact_e	('BjSA', 'Neutral')	BjSA	Neutral
1622	EX_4hbz_e	GSMM_170	EX_hxan_e	GSMM_103	EX_diact_e	('BjSA', 'Neutral')	BjSA	Neutral
1623	EX_4hbz_e	GSMM_176	EX_hxan_e	GSMM_103	EX_diact_e	('BjSA', 'Neutral')	BjSA	Neutral
1632	EX_4hbz_e	GSMM_176	EX_lcts_e	GSMM_103	EX_diact_e	('BjSA', 'Neutral')	BjSA	Neutral
1640	EX_4hbz_e	GSMM_011	EX_acald_e	GSMM_282	EX_ile__L_e	('BjSA', 'Neutral')	BjSA	Neutral
1643	EX_4hbz_e	GSMM_017	EX_acald_e	GSMM_282	EX_ile__L_e	('BjSA', 'Neutral')	BjSA	Neutral
1649	EX_4hbz_e	GSMM_048	EX_acald_e	GSMM_282	EX_ile__L_e	('BjSA', 'Neutral')	BjSA	Neutral
1657	EX_4hbz_e	GSMM_091	EX_acald_e	GSMM_282	EX_ile__L_e	('BjSA', 'Neutral')	BjSA	Neutral
1661	EX_4hbz_e	GSMM_105	EX_acald_e	GSMM_282	EX_ile__L_e	('BjSA', 'Neutral')	BjSA	Neutral
1667	EX_4hbz_e	GSMM_155	EX_acald_e	GSMM_282	EX_ile__L_e	('BjSA', 'Neutral')	BjSA	Neutral
1669	EX_4hbz_e	GSMM_159	EX_acald_e	GSMM_282	EX_ile__L_e	('BjSA', 'Neutral')	BjSA	Neutral
1672	EX_4hbz_e	GSMM_166	EX_acald_e	GSMM_282	EX_ile__L_e	('BjSA', 'Neutral')	BjSA	Neutral
1673	EX_4hbz_e	GSMM_170	EX_acald_e	GSMM_282	EX_ile__L_e	('BjSA', 'Neutral')	BjSA	Neutral
1676	EX_4hbz_e	GSMM_208	EX_acald_e	GSMM_282	EX_ile__L_e	('BjSA', 'Neutral')	BjSA	Neutral
1681	EX_4hbz_e	GSMM_244	EX_acald_e	GSMM_282	EX_ile__L_e	('BjSA', 'Neutral')	BjSA	Neutral
1689	EX_4hbz_e	GSMM_314	EX_acald_e	GSMM_282	EX_ile__L_e	('BjSA', 'Neutral')	BjSA	Neutral
1701	EX_4hbz_e	GSMM_014	EX_5drib_e	GSMM_282	EX_ile__L_e	('BjSA', 'Neutral')	BjSA	Neutral
1703	EX_4hbz_e	GSMM_017	EX_5drib_e	GSMM_282	EX_ile__L_e	('BjSA', 'Neutral')	BjSA	Neutral
1707	EX_4hbz_e	GSMM_048	EX_5drib_e	GSMM_282	EX_ile__L_e	('BjSA', 'Neutral')	BjSA	Neutral
1715	EX_4hbz_e	GSMM_091	EX_5drib_e	GSMM_282	EX_ile__L_e	('BjSA', 'Neutral')	BjSA	Neutral
1719	EX_4hbz_e	GSMM_105	EX_5drib_e	GSMM_282	EX_ile__L_e	('BjSA', 'Neutral')	BjSA	Neutral
1725	EX_4hbz_e	GSMM_155	EX_5drib_e	GSMM_282	EX_ile__L_e	('BjSA', 'Neutral')	BjSA	Neutral
1726	EX_4hbz_e	GSMM_159	EX_5drib_e	GSMM_282	EX_ile__L_e	('BjSA', 'Neutral')	BjSA	Neutral
1728	EX_4hbz_e	GSMM_166	EX_5drib_e	GSMM_282	EX_ile__L_e	('BjSA', 'Neutral')	BjSA	Neutral
1729	EX_4hbz_e	GSMM_176	EX_5drib_e	GSMM_282	EX_ile__L_e	('BjSA', 'Neutral')	BjSA	Neutral
1732	EX_4hbz_e	GSMM_208	EX_5drib_e	GSMM_282	EX_ile__L_e	('BjSA', 'Neutral')	BjSA	Neutral
1737	EX_4hbz_e	GSMM_244	EX_5drib_e	GSMM_282	EX_ile__L_e	('BjSA', 'Neutral')	BjSA	Neutral
1745	EX_4hbz_e	GSMM_314	EX_5drib_e	GSMM_282	EX_ile__L_e	('BjSA', 'Neutral')	BjSA	Neutral
1751	EX_4hbz_e	GSMM_354	EX_5drib_e	GSMM_282	EX_ile__L_e	('BjSA', 'Neutral')	BjSA	Neutral
1762	EX_4hbz_e	GSMM_048	EX_for_e	GSMM_282	EX_ile__L_e	('BjSA', 'Neutral')	BjSA	Neutral
1770	EX_4hbz_e	GSMM_155	EX_for_e	GSMM_282	EX_ile__L_e	('BjSA', 'Neutral')	BjSA	Neutral
1772	EX_4hbz_e	GSMM_176	EX_for_e	GSMM_282	EX_ile__L_e	('BjSA', 'Neutral')	BjSA	Neutral
1784	EX_4hbz_e	GSMM_011	EX_etoh_e	GSMM_282	EX_ile__L_e	('BjSA', 'Neutral')	BjSA	Neutral
1785	EX_4hbz_e	GSMM_014	EX_etoh_e	GSMM_282	EX_ile__L_e	('BjSA', 'Neutral')	BjSA	Neutral
1788	EX_4hbz_e	GSMM_017	EX_etoh_e	GSMM_282	EX_ile__L_e	('BjSA', 'Neutral')	BjSA	Neutral
1794	EX_4hbz_e	GSMM_048	EX_etoh_e	GSMM_282	EX_ile__L_e	('BjSA', 'Neutral')	BjSA	Neutral
1804	EX_4hbz_e	GSMM_105	EX_etoh_e	GSMM_282	EX_ile__L_e	('BjSA', 'Neutral')	BjSA	Neutral
1811	EX_4hbz_e	GSMM_159	EX_etoh_e	GSMM_282	EX_ile__L_e	('BjSA', 'Neutral')	BjSA	Neutral
1813	EX_4hbz_e	GSMM_166	EX_etoh_e	GSMM_282	EX_ile__L_e	('BjSA', 'Neutral')	BjSA	Neutral
1814	EX_4hbz_e	GSMM_176	EX_etoh_e	GSMM_282	EX_ile__L_e	('BjSA', 'Neutral')	BjSA	Neutral
1817	EX_4hbz_e	GSMM_208	EX_etoh_e	GSMM_282	EX_ile__L_e	('BjSA', 'Neutral')	BjSA	Neutral
1822	EX_4hbz_e	GSMM_244	EX_etoh_e	GSMM_282	EX_ile__L_e	('BjSA', 'Neutral')	BjSA	Neutral
1835	EX_4hbz_e	GSMM_354	EX_etoh_e	GSMM_282	EX_ile__L_e	('BjSA', 'Neutral')	BjSA	Neutral
1844	EX_4hbz_e	GSMM_011	EX_glyc3p_e	GSMM_282	EX_ile__L_e	('BjSA', 'Neutral')	BjSA	Neutral
1845	EX_4hbz_e	GSMM_014	EX_glyc3p_e	GSMM_282	EX_ile__L_e	('BjSA', 'Neutral')	BjSA	Neutral
1847	EX_4hbz_e	GSMM_017	EX_glyc3p_e	GSMM_282	EX_ile__L_e	('BjSA', 'Neutral')	BjSA	Neutral
1852	EX_4hbz_e	GSMM_105	EX_glyc3p_e	GSMM_282	EX_ile__L_e	('BjSA', 'Neutral')	BjSA	Neutral
1856	EX_4hbz_e	GSMM_155	EX_glyc3p_e	GSMM_282	EX_ile__L_e	('BjSA', 'Neutral')	BjSA	Neutral
1858	EX_4hbz_e	GSMM_176	EX_glyc3p_e	GSMM_282	EX_ile__L_e	('BjSA', 'Neutral')	BjSA	Neutral
1860	EX_4hbz_e	GSMM_208	EX_glyc3p_e	GSMM_282	EX_ile__L_e	('BjSA', 'Neutral')	BjSA	Neutral
1873	EX_4hbz_e	GSMM_354	EX_glyc3p_e	GSMM_282	EX_ile__L_e	('BjSA', 'Neutral')	BjSA	Neutral
1877	EX_4hbz_e	GSMM_011	EX_ptrc_e	GSMM_282	EX_ile__L_e	('BjSA', 'Neutral')	BjSA	Neutral
1883	EX_4hbz_e	GSMM_048	EX_ptrc_e	GSMM_282	EX_ile__L_e	('BjSA', 'Neutral')	BjSA	Neutral
1891	EX_4hbz_e	GSMM_105	EX_ptrc_e	GSMM_282	EX_ile__L_e	('BjSA', 'Neutral')	BjSA	Neutral
1895	EX_4hbz_e	GSMM_155	EX_ptrc_e	GSMM_282	EX_ile__L_e	('BjSA', 'Neutral')	BjSA	Neutral
1897	EX_4hbz_e	GSMM_159	EX_ptrc_e	GSMM_282	EX_ile__L_e	('BjSA', 'Neutral')	BjSA	Neutral
1899	EX_4hbz_e	GSMM_166	EX_ptrc_e	GSMM_282	EX_ile__L_e	('BjSA', 'Neutral')	BjSA	Neutral
1900	EX_4hbz_e	GSMM_176	EX_ptrc_e	GSMM_282	EX_ile__L_e	('BjSA', 'Neutral')	BjSA	Neutral
1903	EX_4hbz_e	GSMM_208	EX_ptrc_e	GSMM_282	EX_ile__L_e	('BjSA', 'Neutral')	BjSA	Neutral
1907	EX_4hbz_e	GSMM_244	EX_ptrc_e	GSMM_282	EX_ile__L_e	('BjSA', 'Neutral')	BjSA	Neutral
1913	EX_4hbz_e	GSMM_314	EX_ptrc_e	GSMM_282	EX_ile__L_e	('BjSA', 'Neutral')	BjSA	Neutral
1919	EX_4hbz_e	GSMM_354	EX_ptrc_e	GSMM_282	EX_ile__L_e	('BjSA', 'Neutral')	BjSA	Neutral
1926	EX_4hbz_e	GSMM_011	EX_rib__D_e	GSMM_282	EX_ile__L_e	('BjSA', 'Neutral')	BjSA	Neutral
1927	EX_4hbz_e	GSMM_014	EX_rib__D_e	GSMM_282	EX_ile__L_e	('BjSA', 'Neutral')	BjSA	Neutral
1933	EX_4hbz_e	GSMM_048	EX_rib__D_e	GSMM_282	EX_ile__L_e	('BjSA', 'Neutral')	BjSA	Neutral
1938	EX_4hbz_e	GSMM_091	EX_rib__D_e	GSMM_282	EX_ile__L_e	('BjSA', 'Neutral')	BjSA	Neutral
1947	EX_4hbz_e	GSMM_170	EX_rib__D_e	GSMM_282	EX_ile__L_e	('BjSA', 'Neutral')	BjSA	Neutral
1948	EX_4hbz_e	GSMM_176	EX_rib__D_e	GSMM_282	EX_ile__L_e	('BjSA', 'Neutral')	BjSA	Neutral
1951	EX_4hbz_e	GSMM_208	EX_rib__D_e	GSMM_282	EX_ile__L_e	('BjSA', 'Neutral')	BjSA	Neutral
1962	EX_4hbz_e	GSMM_314	EX_rib__D_e	GSMM_282	EX_ile__L_e	('BjSA', 'Neutral')	BjSA	Neutral
1969	EX_4hbz_e	GSMM_354	EX_rib__D_e	GSMM_282	EX_ile__L_e	('BjSA', 'Neutral')	BjSA	Neutral
1977	EX_4hbz_e	GSMM_014	EX_actn__R_e	GSMM_282	EX_ile__L_e	('BjSA', 'Neutral')	BjSA	Neutral
1985	EX_4hbz_e	GSMM_091	EX_actn__R_e	GSMM_282	EX_ile__L_e	('BjSA', 'Neutral')	BjSA	Neutral
1987	EX_4hbz_e	GSMM_105	EX_actn__R_e	GSMM_282	EX_ile__L_e	('BjSA', 'Neutral')	BjSA	Neutral
1989	EX_4hbz_e	GSMM_155	EX_actn__R_e	GSMM_282	EX_ile__L_e	('BjSA', 'Neutral')	BjSA	Neutral
1990	EX_4hbz_e	GSMM_166	EX_actn__R_e	GSMM_282	EX_ile__L_e	('BjSA', 'Neutral')	BjSA	Neutral
1991	EX_4hbz_e	GSMM_176	EX_actn__R_e	GSMM_282	EX_ile__L_e	('BjSA', 'Neutral')	BjSA	Neutral
1999	EX_4hbz_e	GSMM_354	EX_actn__R_e	GSMM_282	EX_ile__L_e	('BjSA', 'Neutral')	BjSA	Neutral
2005	EX_4hbz_e	GSMM_014	EX_spmd_e	GSMM_282	EX_ile__L_e	('BjSA', 'Neutral')	BjSA	Neutral
2008	EX_4hbz_e	GSMM_017	EX_spmd_e	GSMM_282	EX_ile__L_e	('BjSA', 'Neutral')	BjSA	Neutral
2012	EX_4hbz_e	GSMM_048	EX_spmd_e	GSMM_282	EX_ile__L_e	('BjSA', 'Neutral')	BjSA	Neutral
2019	EX_4hbz_e	GSMM_091	EX_spmd_e	GSMM_282	EX_ile__L_e	('BjSA', 'Neutral')	BjSA	Neutral
2022	EX_4hbz_e	GSMM_105	EX_spmd_e	GSMM_282	EX_ile__L_e	('BjSA', 'Neutral')	BjSA	Neutral
2028	EX_4hbz_e	GSMM_159	EX_spmd_e	GSMM_282	EX_ile__L_e	('BjSA', 'Neutral')	BjSA	Neutral
2031	EX_4hbz_e	GSMM_166	EX_spmd_e	GSMM_282	EX_ile__L_e	('BjSA', 'Neutral')	BjSA	Neutral
2032	EX_4hbz_e	GSMM_170	EX_spmd_e	GSMM_282	EX_ile__L_e	('BjSA', 'Neutral')	BjSA	Neutral
2034	EX_4hbz_e	GSMM_208	EX_spmd_e	GSMM_282	EX_ile__L_e	('BjSA', 'Neutral')	BjSA	Neutral
2043	EX_4hbz_e	GSMM_314	EX_spmd_e	GSMM_282	EX_ile__L_e	('BjSA', 'Neutral')	BjSA	Neutral
2047	EX_4hbz_e	GSMM_354	EX_spmd_e	GSMM_282	EX_ile__L_e	('BjSA', 'Neutral')	BjSA	Neutral
2054	EX_4hbz_e	GSMM_011	EX_glyc_e	GSMM_282	EX_ile__L_e	('BjSA', 'Neutral')	BjSA	Neutral
2055	EX_4hbz_e	GSMM_014	EX_glyc_e	GSMM_282	EX_ile__L_e	('BjSA', 'Neutral')	BjSA	Neutral
2058	EX_4hbz_e	GSMM_017	EX_glyc_e	GSMM_282	EX_ile__L_e	('BjSA', 'Neutral')	BjSA	Neutral
2064	EX_4hbz_e	GSMM_048	EX_glyc_e	GSMM_282	EX_ile__L_e	('BjSA', 'Neutral')	BjSA	Neutral
2071	EX_4hbz_e	GSMM_091	EX_glyc_e	GSMM_282	EX_ile__L_e	('BjSA', 'Neutral')	BjSA	Neutral
2075	EX_4hbz_e	GSMM_105	EX_glyc_e	GSMM_282	EX_ile__L_e	('BjSA', 'Neutral')	BjSA	Neutral
2080	EX_4hbz_e	GSMM_155	EX_glyc_e	GSMM_282	EX_ile__L_e	('BjSA', 'Neutral')	BjSA	Neutral
2082	EX_4hbz_e	GSMM_159	EX_glyc_e	GSMM_282	EX_ile__L_e	('BjSA', 'Neutral')	BjSA	Neutral
2085	EX_4hbz_e	GSMM_166	EX_glyc_e	GSMM_282	EX_ile__L_e	('BjSA', 'Neutral')	BjSA	Neutral
2086	EX_4hbz_e	GSMM_176	EX_glyc_e	GSMM_282	EX_ile__L_e	('BjSA', 'Neutral')	BjSA	Neutral
2089	EX_4hbz_e	GSMM_208	EX_glyc_e	GSMM_282	EX_ile__L_e	('BjSA', 'Neutral')	BjSA	Neutral
2094	EX_4hbz_e	GSMM_244	EX_glyc_e	GSMM_282	EX_ile__L_e	('BjSA', 'Neutral')	BjSA	Neutral
2102	EX_4hbz_e	GSMM_314	EX_glyc_e	GSMM_282	EX_ile__L_e	('BjSA', 'Neutral')	BjSA	Neutral
2109	EX_4hbz_e	GSMM_354	EX_glyc_e	GSMM_282	EX_ile__L_e	('BjSA', 'Neutral')	BjSA	Neutral
2118	EX_4hbz_e	GSMM_011	EX_fe3pyovd_kt_e	GSMM_282	EX_ile__L_e	('BjSA', 'Neutral')	BjSA	Neutral
2119	EX_4hbz_e	GSMM_014	EX_fe3pyovd_kt_e	GSMM_282	EX_ile__L_e	('BjSA', 'Neutral')	BjSA	Neutral
2122	EX_4hbz_e	GSMM_017	EX_fe3pyovd_kt_e	GSMM_282	EX_ile__L_e	('BjSA', 'Neutral')	BjSA	Neutral
2128	EX_4hbz_e	GSMM_048	EX_fe3pyovd_kt_e	GSMM_282	EX_ile__L_e	('BjSA', 'Neutral')	BjSA	Neutral
2136	EX_4hbz_e	GSMM_091	EX_fe3pyovd_kt_e	GSMM_282	EX_ile__L_e	('BjSA', 'Neutral')	BjSA	Neutral
2140	EX_4hbz_e	GSMM_105	EX_fe3pyovd_kt_e	GSMM_282	EX_ile__L_e	('BjSA', 'Neutral')	BjSA	Neutral
2146	EX_4hbz_e	GSMM_155	EX_fe3pyovd_kt_e	GSMM_282	EX_ile__L_e	('BjSA', 'Neutral')	BjSA	Neutral
2148	EX_4hbz_e	GSMM_159	EX_fe3pyovd_kt_e	GSMM_282	EX_ile__L_e	('BjSA', 'Neutral')	BjSA	Neutral
2151	EX_4hbz_e	GSMM_166	EX_fe3pyovd_kt_e	GSMM_282	EX_ile__L_e	('BjSA', 'Neutral')	BjSA	Neutral
2152	EX_4hbz_e	GSMM_170	EX_fe3pyovd_kt_e	GSMM_282	EX_ile__L_e	('BjSA', 'Neutral')	BjSA	Neutral
2153	EX_4hbz_e	GSMM_176	EX_fe3pyovd_kt_e	GSMM_282	EX_ile__L_e	('BjSA', 'Neutral')	BjSA	Neutral
2156	EX_4hbz_e	GSMM_208	EX_fe3pyovd_kt_e	GSMM_282	EX_ile__L_e	('BjSA', 'Neutral')	BjSA	Neutral
2161	EX_4hbz_e	GSMM_244	EX_fe3pyovd_kt_e	GSMM_282	EX_ile__L_e	('BjSA', 'Neutral')	BjSA	Neutral
2170	EX_4hbz_e	GSMM_314	EX_fe3pyovd_kt_e	GSMM_282	EX_ile__L_e	('BjSA', 'Neutral')	BjSA	Neutral
2177	EX_4hbz_e	GSMM_354	EX_fe3pyovd_kt_e	GSMM_282	EX_ile__L_e	('BjSA', 'Neutral')	BjSA	Neutral
2186	EX_4hbz_e	GSMM_011	EX_pyovd_kt_e	GSMM_282	EX_ile__L_e	('BjSA', 'Neutral')	BjSA	Neutral
2187	EX_4hbz_e	GSMM_014	EX_pyovd_kt_e	GSMM_282	EX_ile__L_e	('BjSA', 'Neutral')	BjSA	Neutral
2190	EX_4hbz_e	GSMM_017	EX_pyovd_kt_e	GSMM_282	EX_ile__L_e	('BjSA', 'Neutral')	BjSA	Neutral
2196	EX_4hbz_e	GSMM_048	EX_pyovd_kt_e	GSMM_282	EX_ile__L_e	('BjSA', 'Neutral')	BjSA	Neutral
2204	EX_4hbz_e	GSMM_091	EX_pyovd_kt_e	GSMM_282	EX_ile__L_e	('BjSA', 'Neutral')	BjSA	Neutral
2208	EX_4hbz_e	GSMM_105	EX_pyovd_kt_e	GSMM_282	EX_ile__L_e	('BjSA', 'Neutral')	BjSA	Neutral
2214	EX_4hbz_e	GSMM_155	EX_pyovd_kt_e	GSMM_282	EX_ile__L_e	('BjSA', 'Neutral')	BjSA	Neutral
2216	EX_4hbz_e	GSMM_159	EX_pyovd_kt_e	GSMM_282	EX_ile__L_e	('BjSA', 'Neutral')	BjSA	Neutral
2219	EX_4hbz_e	GSMM_166	EX_pyovd_kt_e	GSMM_282	EX_ile__L_e	('BjSA', 'Neutral')	BjSA	Neutral
2220	EX_4hbz_e	GSMM_170	EX_pyovd_kt_e	GSMM_282	EX_ile__L_e	('BjSA', 'Neutral')	BjSA	Neutral
2221	EX_4hbz_e	GSMM_176	EX_pyovd_kt_e	GSMM_282	EX_ile__L_e	('BjSA', 'Neutral')	BjSA	Neutral
2224	EX_4hbz_e	GSMM_208	EX_pyovd_kt_e	GSMM_282	EX_ile__L_e	('BjSA', 'Neutral')	BjSA	Neutral
2229	EX_4hbz_e	GSMM_244	EX_pyovd_kt_e	GSMM_282	EX_ile__L_e	('BjSA', 'Neutral')	BjSA	Neutral
2238	EX_4hbz_e	GSMM_314	EX_pyovd_kt_e	GSMM_282	EX_ile__L_e	('BjSA', 'Neutral')	BjSA	Neutral
2245	EX_4hbz_e	GSMM_354	EX_pyovd_kt_e	GSMM_282	EX_ile__L_e	('BjSA', 'Neutral')	BjSA	Neutral
2254	EX_4hbz_e	GSMM_017	EX_cellb_e	GSMM_282	EX_ile__L_e	('BjSA', 'Neutral')	BjSA	Neutral
2257	EX_4hbz_e	GSMM_105	EX_cellb_e	GSMM_282	EX_ile__L_e	('BjSA', 'Neutral')	BjSA	Neutral
2258	EX_4hbz_e	GSMM_155	EX_cellb_e	GSMM_282	EX_ile__L_e	('BjSA', 'Neutral')	BjSA	Neutral
2259	EX_4hbz_e	GSMM_159	EX_cellb_e	GSMM_282	EX_ile__L_e	('BjSA', 'Neutral')	BjSA	Neutral
2261	EX_4hbz_e	GSMM_011	EX_ser__L_e	GSMM_282	EX_ile__L_e	('BjSA', 'Neutral')	BjSA	Neutral
2262	EX_4hbz_e	GSMM_014	EX_ser__L_e	GSMM_282	EX_ile__L_e	('BjSA', 'Neutral')	BjSA	Neutral
2264	EX_4hbz_e	GSMM_017	EX_ser__L_e	GSMM_282	EX_ile__L_e	('BjSA', 'Neutral')	BjSA	Neutral
2267	EX_4hbz_e	GSMM_048	EX_ser__L_e	GSMM_282	EX_ile__L_e	('BjSA', 'Neutral')	BjSA	Neutral
2276	EX_4hbz_e	GSMM_155	EX_ser__L_e	GSMM_282	EX_ile__L_e	('BjSA', 'Neutral')	BjSA	Neutral
2278	EX_4hbz_e	GSMM_166	EX_ser__L_e	GSMM_282	EX_ile__L_e	('BjSA', 'Neutral')	BjSA	Neutral
2280	EX_4hbz_e	GSMM_208	EX_ser__L_e	GSMM_282	EX_ile__L_e	('BjSA', 'Neutral')	BjSA	Neutral
2293	EX_4hbz_e	GSMM_354	EX_ser__L_e	GSMM_282	EX_ile__L_e	('BjSA', 'Neutral')	BjSA	Neutral
2298	EX_4hbz_e	GSMM_011	EX_oxa_e	GSMM_282	EX_ile__L_e	('BjSA', 'Neutral')	BjSA	Neutral
2302	EX_4hbz_e	GSMM_048	EX_oxa_e	GSMM_282	EX_ile__L_e	('BjSA', 'Neutral')	BjSA	Neutral
2309	EX_4hbz_e	GSMM_105	EX_oxa_e	GSMM_282	EX_ile__L_e	('BjSA', 'Neutral')	BjSA	Neutral
2315	EX_4hbz_e	GSMM_166	EX_oxa_e	GSMM_282	EX_ile__L_e	('BjSA', 'Neutral')	BjSA	Neutral
2317	EX_4hbz_e	GSMM_208	EX_oxa_e	GSMM_282	EX_ile__L_e	('BjSA', 'Neutral')	BjSA	Neutral
2326	EX_4hbz_e	GSMM_354	EX_oxa_e	GSMM_282	EX_ile__L_e	('BjSA', 'Neutral')	BjSA	Neutral
2331	EX_4hbz_e	GSMM_011	EX_urea_e	GSMM_282	EX_ile__L_e	('BjSA', 'Neutral')	BjSA	Neutral
2332	EX_4hbz_e	GSMM_014	EX_urea_e	GSMM_282	EX_ile__L_e	('BjSA', 'Neutral')	BjSA	Neutral
2340	EX_4hbz_e	GSMM_048	EX_urea_e	GSMM_282	EX_ile__L_e	('BjSA', 'Neutral')	BjSA	Neutral
2346	EX_4hbz_e	GSMM_091	EX_urea_e	GSMM_282	EX_ile__L_e	('BjSA', 'Neutral')	BjSA	Neutral
2350	EX_4hbz_e	GSMM_105	EX_urea_e	GSMM_282	EX_ile__L_e	('BjSA', 'Neutral')	BjSA	Neutral
2357	EX_4hbz_e	GSMM_166	EX_urea_e	GSMM_282	EX_ile__L_e	('BjSA', 'Neutral')	BjSA	Neutral
2358	EX_4hbz_e	GSMM_176	EX_urea_e	GSMM_282	EX_ile__L_e	('BjSA', 'Neutral')	BjSA	Neutral
2363	EX_4hbz_e	GSMM_244	EX_urea_e	GSMM_282	EX_ile__L_e	('BjSA', 'Neutral')	BjSA	Neutral
2372	EX_4hbz_e	GSMM_314	EX_urea_e	GSMM_282	EX_ile__L_e	('BjSA', 'Neutral')	BjSA	Neutral
2378	EX_4hbz_e	GSMM_354	EX_urea_e	GSMM_282	EX_ile__L_e	('BjSA', 'Neutral')	BjSA	Neutral
2386	EX_4hbz_e	GSMM_014	EX_inost_e	GSMM_282	EX_ile__L_e	('BjSA', 'Neutral')	BjSA	Neutral
2389	EX_4hbz_e	GSMM_017	EX_inost_e	GSMM_282	EX_ile__L_e	('BjSA', 'Neutral')	BjSA	Neutral
2391	EX_4hbz_e	GSMM_048	EX_inost_e	GSMM_282	EX_ile__L_e	('BjSA', 'Neutral')	BjSA	Neutral
2396	EX_4hbz_e	GSMM_105	EX_inost_e	GSMM_282	EX_ile__L_e	('BjSA', 'Neutral')	BjSA	Neutral
2399	EX_4hbz_e	GSMM_155	EX_inost_e	GSMM_282	EX_ile__L_e	('BjSA', 'Neutral')	BjSA	Neutral
2402	EX_4hbz_e	GSMM_166	EX_inost_e	GSMM_282	EX_ile__L_e	('BjSA', 'Neutral')	BjSA	Neutral
2403	EX_4hbz_e	GSMM_170	EX_inost_e	GSMM_282	EX_ile__L_e	('BjSA', 'Neutral')	BjSA	Neutral
2404	EX_4hbz_e	GSMM_208	EX_inost_e	GSMM_282	EX_ile__L_e	('BjSA', 'Neutral')	BjSA	Neutral
2409	EX_4hbz_e	GSMM_354	EX_inost_e	GSMM_282	EX_ile__L_e	('BjSA', 'Neutral')	BjSA	Neutral
2412	EX_4hbz_e	GSMM_011	EX_chol_e	GSMM_282	EX_ile__L_e	('BjSA', 'Neutral')	BjSA	Neutral
2413	EX_4hbz_e	GSMM_014	EX_chol_e	GSMM_282	EX_ile__L_e	('BjSA', 'Neutral')	BjSA	Neutral
2415	EX_4hbz_e	GSMM_017	EX_chol_e	GSMM_282	EX_ile__L_e	('BjSA', 'Neutral')	BjSA	Neutral
2421	EX_4hbz_e	GSMM_105	EX_chol_e	GSMM_282	EX_ile__L_e	('BjSA', 'Neutral')	BjSA	Neutral
2424	EX_4hbz_e	GSMM_155	EX_chol_e	GSMM_282	EX_ile__L_e	('BjSA', 'Neutral')	BjSA	Neutral
2426	EX_4hbz_e	GSMM_166	EX_chol_e	GSMM_282	EX_ile__L_e	('BjSA', 'Neutral')	BjSA	Neutral
2428	EX_4hbz_e	GSMM_208	EX_chol_e	GSMM_282	EX_ile__L_e	('BjSA', 'Neutral')	BjSA	Neutral
2443	EX_4hbz_e	GSMM_354	EX_chol_e	GSMM_282	EX_ile__L_e	('BjSA', 'Neutral')	BjSA	Neutral
2447	EX_4hbz_e	GSMM_011	EX_glyald_e	GSMM_282	EX_ile__L_e	('BjSA', 'Neutral')	BjSA	Neutral
2452	EX_4hbz_e	GSMM_091	EX_glyald_e	GSMM_282	EX_ile__L_e	('BjSA', 'Neutral')	BjSA	Neutral
2455	EX_4hbz_e	GSMM_105	EX_glyald_e	GSMM_282	EX_ile__L_e	('BjSA', 'Neutral')	BjSA	Neutral
2458	EX_4hbz_e	GSMM_159	EX_glyald_e	GSMM_282	EX_ile__L_e	('BjSA', 'Neutral')	BjSA	Neutral
2461	EX_4hbz_e	GSMM_166	EX_glyald_e	GSMM_282	EX_ile__L_e	('BjSA', 'Neutral')	BjSA	Neutral
2462	EX_4hbz_e	GSMM_170	EX_glyald_e	GSMM_282	EX_ile__L_e	('BjSA', 'Neutral')	BjSA	Neutral
2479	EX_4hbz_e	GSMM_011	EX_ch4s_e	GSMM_282	EX_ile__L_e	('BjSA', 'Neutral')	BjSA	Neutral
2480	EX_4hbz_e	GSMM_014	EX_ch4s_e	GSMM_282	EX_ile__L_e	('BjSA', 'Neutral')	BjSA	Neutral
2491	EX_4hbz_e	GSMM_159	EX_ch4s_e	GSMM_282	EX_ile__L_e	('BjSA', 'Neutral')	BjSA	Neutral
2493	EX_4hbz_e	GSMM_170	EX_ch4s_e	GSMM_282	EX_ile__L_e	('BjSA', 'Neutral')	BjSA	Neutral
2502	EX_4hbz_e	GSMM_314	EX_ch4s_e	GSMM_282	EX_ile__L_e	('BjSA', 'Neutral')	BjSA	Neutral
2505	EX_4hbz_e	GSMM_354	EX_ch4s_e	GSMM_282	EX_ile__L_e	('BjSA', 'Neutral')	BjSA	Neutral
2510	EX_4hbz_e	GSMM_011	EX_gal_e	GSMM_282	EX_ile__L_e	('BjSA', 'Neutral')	BjSA	Neutral
2511	EX_4hbz_e	GSMM_017	EX_gal_e	GSMM_282	EX_ile__L_e	('BjSA', 'Neutral')	BjSA	Neutral
2516	EX_4hbz_e	GSMM_048	EX_gal_e	GSMM_282	EX_ile__L_e	('BjSA', 'Neutral')	BjSA	Neutral
2521	EX_4hbz_e	GSMM_091	EX_gal_e	GSMM_282	EX_ile__L_e	('BjSA', 'Neutral')	BjSA	Neutral
2530	EX_4hbz_e	GSMM_170	EX_gal_e	GSMM_282	EX_ile__L_e	('BjSA', 'Neutral')	BjSA	Neutral
2531	EX_4hbz_e	GSMM_208	EX_gal_e	GSMM_282	EX_ile__L_e	('BjSA', 'Neutral')	BjSA	Neutral
2536	EX_4hbz_e	GSMM_244	EX_gal_e	GSMM_282	EX_ile__L_e	('BjSA', 'Neutral')	BjSA	Neutral
2546	EX_4hbz_e	GSMM_354	EX_gal_e	GSMM_282	EX_ile__L_e	('BjSA', 'Neutral')	BjSA	Neutral
2551	EX_4hbz_e	GSMM_011	EX_gua_e	GSMM_282	EX_ile__L_e	('BjSA', 'Neutral')	BjSA	Neutral
2552	EX_4hbz_e	GSMM_017	EX_gua_e	GSMM_282	EX_ile__L_e	('BjSA', 'Neutral')	BjSA	Neutral
2560	EX_4hbz_e	GSMM_170	EX_gua_e	GSMM_282	EX_ile__L_e	('BjSA', 'Neutral')	BjSA	Neutral
2570	EX_4hbz_e	GSMM_011	EX_asp__D_e	GSMM_282	EX_ile__L_e	('BjSA', 'Neutral')	BjSA	Neutral
2574	EX_4hbz_e	GSMM_159	EX_asp__D_e	GSMM_282	EX_ile__L_e	('BjSA', 'Neutral')	BjSA	Neutral
2577	EX_4hbz_e	GSMM_011	EX_meoh_e	GSMM_282	EX_ile__L_e	('BjSA', 'Neutral')	BjSA	Neutral
2582	EX_4hbz_e	GSMM_091	EX_meoh_e	GSMM_282	EX_ile__L_e	('BjSA', 'Neutral')	BjSA	Neutral
2588	EX_4hbz_e	GSMM_159	EX_meoh_e	GSMM_282	EX_ile__L_e	('BjSA', 'Neutral')	BjSA	Neutral
2590	EX_4hbz_e	GSMM_176	EX_meoh_e	GSMM_282	EX_ile__L_e	('BjSA', 'Neutral')	BjSA	Neutral
2592	EX_4hbz_e	GSMM_208	EX_meoh_e	GSMM_282	EX_ile__L_e	('BjSA', 'Neutral')	BjSA	Neutral
2606	EX_4hbz_e	GSMM_011	EX_orn_e	GSMM_282	EX_ile__L_e	('BjSA', 'Neutral')	BjSA	Neutral
2607	EX_4hbz_e	GSMM_014	EX_orn_e	GSMM_282	EX_ile__L_e	('BjSA', 'Neutral')	BjSA	Neutral
2617	EX_4hbz_e	GSMM_105	EX_orn_e	GSMM_282	EX_ile__L_e	('BjSA', 'Neutral')	BjSA	Neutral
2621	EX_4hbz_e	GSMM_155	EX_orn_e	GSMM_282	EX_ile__L_e	('BjSA', 'Neutral')	BjSA	Neutral
2624	EX_4hbz_e	GSMM_166	EX_orn_e	GSMM_282	EX_ile__L_e	('BjSA', 'Neutral')	BjSA	Neutral
2625	EX_4hbz_e	GSMM_176	EX_orn_e	GSMM_282	EX_ile__L_e	('BjSA', 'Neutral')	BjSA	Neutral
2635	EX_4hbz_e	GSMM_354	EX_orn_e	GSMM_282	EX_ile__L_e	('BjSA', 'Neutral')	BjSA	Neutral
2641	EX_4hbz_e	GSMM_014	EX_gthrd_e	GSMM_282	EX_ile__L_e	('BjSA', 'Neutral')	BjSA	Neutral
2650	EX_4hbz_e	GSMM_159	EX_gthrd_e	GSMM_282	EX_ile__L_e	('BjSA', 'Neutral')	BjSA	Neutral
2651	EX_4hbz_e	GSMM_166	EX_gthrd_e	GSMM_282	EX_ile__L_e	('BjSA', 'Neutral')	BjSA	Neutral
2660	EX_4hbz_e	GSMM_014	EX_pea_e	GSMM_282	EX_ile__L_e	('BjSA', 'Neutral')	BjSA	Neutral
2663	EX_4hbz_e	GSMM_048	EX_pea_e	GSMM_282	EX_ile__L_e	('BjSA', 'Neutral')	BjSA	Neutral
2668	EX_4hbz_e	GSMM_170	EX_pea_e	GSMM_282	EX_ile__L_e	('BjSA', 'Neutral')	BjSA	Neutral
2675	EX_4hbz_e	GSMM_014	EX_glu__L_e	GSMM_282	EX_ile__L_e	('BjSA', 'Neutral')	BjSA	Neutral
2683	EX_4hbz_e	GSMM_159	EX_glu__L_e	GSMM_282	EX_ile__L_e	('BjSA', 'Neutral')	BjSA	Neutral
2696	EX_4hbz_e	GSMM_014	EX_cgly_e	GSMM_282	EX_ile__L_e	('BjSA', 'Neutral')	BjSA	Neutral
2697	EX_4hbz_e	GSMM_017	EX_cgly_e	GSMM_282	EX_ile__L_e	('BjSA', 'Neutral')	BjSA	Neutral
2707	EX_4hbz_e	GSMM_159	EX_cgly_e	GSMM_282	EX_ile__L_e	('BjSA', 'Neutral')	BjSA	Neutral
2708	EX_4hbz_e	GSMM_166	EX_cgly_e	GSMM_282	EX_ile__L_e	('BjSA', 'Neutral')	BjSA	Neutral
2716	EX_4hbz_e	GSMM_314	EX_cgly_e	GSMM_282	EX_ile__L_e	('BjSA', 'Neutral')	BjSA	Neutral
2722	EX_4hbz_e	GSMM_014	EX_glc__D_e	GSMM_282	EX_ile__L_e	('BjSA', 'Neutral')	BjSA	Neutral
2732	EX_4hbz_e	GSMM_159	EX_glc__D_e	GSMM_282	EX_ile__L_e	('BjSA', 'Neutral')	BjSA	Neutral
2733	EX_4hbz_e	GSMM_166	EX_glc__D_e	GSMM_282	EX_ile__L_e	('BjSA', 'Neutral')	BjSA	Neutral
2734	EX_4hbz_e	GSMM_176	EX_glc__D_e	GSMM_282	EX_ile__L_e	('BjSA', 'Neutral')	BjSA	Neutral
2736	EX_4hbz_e	GSMM_208	EX_glc__D_e	GSMM_282	EX_ile__L_e	('BjSA', 'Neutral')	BjSA	Neutral
2739	EX_4hbz_e	GSMM_244	EX_glc__D_e	GSMM_282	EX_ile__L_e	('BjSA', 'Neutral')	BjSA	Neutral
2744	EX_4hbz_e	GSMM_314	EX_glc__D_e	GSMM_282	EX_ile__L_e	('BjSA', 'Neutral')	BjSA	Neutral
2749	EX_4hbz_e	GSMM_354	EX_glc__D_e	GSMM_282	EX_ile__L_e	('BjSA', 'Neutral')	BjSA	Neutral
2754	EX_4hbz_e	GSMM_014	EX_hom__L_e	GSMM_282	EX_ile__L_e	('BjSA', 'Neutral')	BjSA	Neutral
2758	EX_4hbz_e	GSMM_091	EX_hom__L_e	GSMM_282	EX_ile__L_e	('BjSA', 'Neutral')	BjSA	Neutral
2765	EX_4hbz_e	GSMM_014	EX_cys__L_e	GSMM_282	EX_ile__L_e	('BjSA', 'Neutral')	BjSA	Neutral
2772	EX_4hbz_e	GSMM_105	EX_cys__L_e	GSMM_282	EX_ile__L_e	('BjSA', 'Neutral')	BjSA	Neutral
2773	EX_4hbz_e	GSMM_155	EX_cys__L_e	GSMM_282	EX_ile__L_e	('BjSA', 'Neutral')	BjSA	Neutral
2775	EX_4hbz_e	GSMM_170	EX_cys__L_e	GSMM_282	EX_ile__L_e	('BjSA', 'Neutral')	BjSA	Neutral
2776	EX_4hbz_e	GSMM_176	EX_cys__L_e	GSMM_282	EX_ile__L_e	('BjSA', 'Neutral')	BjSA	Neutral
2782	EX_4hbz_e	GSMM_314	EX_cys__L_e	GSMM_282	EX_ile__L_e	('BjSA', 'Neutral')	BjSA	Neutral
2787	EX_4hbz_e	GSMM_354	EX_cys__L_e	GSMM_282	EX_ile__L_e	('BjSA', 'Neutral')	BjSA	Neutral
2790	EX_4hbz_e	GSMM_014	EX_pheme_e	GSMM_282	EX_ile__L_e	('BjSA', 'Neutral')	BjSA	Neutral
2792	EX_4hbz_e	GSMM_017	EX_pheme_e	GSMM_282	EX_ile__L_e	('BjSA', 'Neutral')	BjSA	Neutral
2799	EX_4hbz_e	GSMM_091	EX_pheme_e	GSMM_282	EX_ile__L_e	('BjSA', 'Neutral')	BjSA	Neutral
2801	EX_4hbz_e	GSMM_105	EX_pheme_e	GSMM_282	EX_ile__L_e	('BjSA', 'Neutral')	BjSA	Neutral
2805	EX_4hbz_e	GSMM_166	EX_pheme_e	GSMM_282	EX_ile__L_e	('BjSA', 'Neutral')	BjSA	Neutral
2806	EX_4hbz_e	GSMM_176	EX_pheme_e	GSMM_282	EX_ile__L_e	('BjSA', 'Neutral')	BjSA	Neutral
2808	EX_4hbz_e	GSMM_208	EX_pheme_e	GSMM_282	EX_ile__L_e	('BjSA', 'Neutral')	BjSA	Neutral
2821	EX_4hbz_e	GSMM_017	EX_g3pe_e	GSMM_282	EX_ile__L_e	('BjSA', 'Neutral')	BjSA	Neutral
2830	EX_4hbz_e	GSMM_176	EX_g3pe_e	GSMM_282	EX_ile__L_e	('BjSA', 'Neutral')	BjSA	Neutral
2831	EX_4hbz_e	GSMM_208	EX_g3pe_e	GSMM_282	EX_ile__L_e	('BjSA', 'Neutral')	BjSA	Neutral
2834	EX_4hbz_e	GSMM_314	EX_g3pe_e	GSMM_282	EX_ile__L_e	('BjSA', 'Neutral')	BjSA	Neutral
2840	EX_4hbz_e	GSMM_048	EX_glcn_e	GSMM_282	EX_ile__L_e	('BjSA', 'Neutral')	BjSA	Neutral
2848	EX_4hbz_e	GSMM_159	EX_glcn_e	GSMM_282	EX_ile__L_e	('BjSA', 'Neutral')	BjSA	Neutral
2850	EX_4hbz_e	GSMM_208	EX_glcn_e	GSMM_282	EX_ile__L_e	('BjSA', 'Neutral')	BjSA	Neutral
2855	EX_4hbz_e	GSMM_048	EX_enter_e	GSMM_282	EX_ile__L_e	('BjSA', 'Neutral')	BjSA	Neutral
2856	EX_4hbz_e	GSMM_091	EX_enter_e	GSMM_282	EX_ile__L_e	('BjSA', 'Neutral')	BjSA	Neutral
2859	EX_4hbz_e	GSMM_155	EX_enter_e	GSMM_282	EX_ile__L_e	('BjSA', 'Neutral')	BjSA	Neutral
2868	EX_4hbz_e	GSMM_017	EX_4abut_e	GSMM_282	EX_ile__L_e	('BjSA', 'Neutral')	BjSA	Neutral
2871	EX_4hbz_e	GSMM_105	EX_4abut_e	GSMM_282	EX_ile__L_e	('BjSA', 'Neutral')	BjSA	Neutral
2874	EX_4hbz_e	GSMM_208	EX_4abut_e	GSMM_282	EX_ile__L_e	('BjSA', 'Neutral')	BjSA	Neutral
2876	EX_4hbz_e	GSMM_244	EX_4abut_e	GSMM_282	EX_ile__L_e	('BjSA', 'Neutral')	BjSA	Neutral
2881	EX_4hbz_e	GSMM_017	EX_lys__L_e	GSMM_282	EX_ile__L_e	('BjSA', 'Neutral')	BjSA	Neutral
2886	EX_4hbz_e	GSMM_091	EX_lys__L_e	GSMM_282	EX_ile__L_e	('BjSA', 'Neutral')	BjSA	Neutral
2891	EX_4hbz_e	GSMM_159	EX_lys__L_e	GSMM_282	EX_ile__L_e	('BjSA', 'Neutral')	BjSA	Neutral
2896	EX_4hbz_e	GSMM_017	EX_agm_e	GSMM_282	EX_ile__L_e	('BjSA', 'Neutral')	BjSA	Neutral
2898	EX_4hbz_e	GSMM_017	EX_thr__L_e	GSMM_282	EX_ile__L_e	('BjSA', 'Neutral')	BjSA	Neutral
2914	EX_4hbz_e	GSMM_354	EX_5dglcn_e	GSMM_282	EX_ile__L_e	('BjSA', 'Neutral')	BjSA	Neutral
2918	EX_4hbz_e	GSMM_208	EX_g3pg_e	GSMM_282	EX_ile__L_e	('BjSA', 'Neutral')	BjSA	Neutral
2937	EX_4hbz_e	GSMM_048	EX_orn__L_e	GSMM_282	EX_ile__L_e	('BjSA', 'Neutral')	BjSA	Neutral
2944	EX_4hbz_e	GSMM_244	EX_leu__L_e	GSMM_282	EX_ile__L_e	('BjSA', 'Neutral')	BjSA	Neutral
2952	EX_4hbz_e	GSMM_314	EX_adn_e	GSMM_282	EX_ile__L_e	('BjSA', 'Neutral')	BjSA	Neutral
2959	EX_4hbz_e	GSMM_314	EX_gsn_e	GSMM_282	EX_ile__L_e	('BjSA', 'Neutral')	BjSA	Neutral
2974	EX_4hbz_e	GSMM_091	EX_thm_e	GSMM_282	EX_ile__L_e	('BjSA', 'Neutral')	BjSA	Neutral
2976	EX_4hbz_e	GSMM_170	EX_thm_e	GSMM_282	EX_ile__L_e	('BjSA', 'Neutral')	BjSA	Neutral
2994	EX_4hbz_e	GSMM_176	EX_lcts_e	GSMM_282	EX_ile__L_e	('BjSA', 'Neutral')	BjSA	Neutral
2996	EX_4hbz_e	GSMM_208	EX_acser_e	GSMM_282	EX_ile__L_e	('BjSA', 'Neutral')	BjSA	Neutral
3002	EX_4hbz_e	GSMM_011	EX_acald_e	GSMM_259	EX_g6p_B_e	('BjSA', 'NTC')	BjSA	NTC
3005	EX_4hbz_e	GSMM_017	EX_acald_e	GSMM_259	EX_g6p_B_e	('BjSA', 'NTC')	BjSA	NTC
3011	EX_4hbz_e	GSMM_048	EX_acald_e	GSMM_259	EX_g6p_B_e	('BjSA', 'NTC')	BjSA	NTC
3019	EX_4hbz_e	GSMM_091	EX_acald_e	GSMM_259	EX_g6p_B_e	('BjSA', 'NTC')	BjSA	NTC
3023	EX_4hbz_e	GSMM_105	EX_acald_e	GSMM_259	EX_g6p_B_e	('BjSA', 'NTC')	BjSA	NTC
3029	EX_4hbz_e	GSMM_155	EX_acald_e	GSMM_259	EX_g6p_B_e	('BjSA', 'NTC')	BjSA	NTC
3031	EX_4hbz_e	GSMM_159	EX_acald_e	GSMM_259	EX_g6p_B_e	('BjSA', 'NTC')	BjSA	NTC
3034	EX_4hbz_e	GSMM_166	EX_acald_e	GSMM_259	EX_g6p_B_e	('BjSA', 'NTC')	BjSA	NTC
3035	EX_4hbz_e	GSMM_170	EX_acald_e	GSMM_259	EX_g6p_B_e	('BjSA', 'NTC')	BjSA	NTC
3038	EX_4hbz_e	GSMM_208	EX_acald_e	GSMM_259	EX_g6p_B_e	('BjSA', 'NTC')	BjSA	NTC
3043	EX_4hbz_e	GSMM_244	EX_acald_e	GSMM_259	EX_g6p_B_e	('BjSA', 'NTC')	BjSA	NTC
3051	EX_4hbz_e	GSMM_314	EX_acald_e	GSMM_259	EX_g6p_B_e	('BjSA', 'NTC')	BjSA	NTC
3063	EX_4hbz_e	GSMM_014	EX_5drib_e	GSMM_259	EX_g6p_B_e	('BjSA', 'NTC')	BjSA	NTC
3065	EX_4hbz_e	GSMM_017	EX_5drib_e	GSMM_259	EX_g6p_B_e	('BjSA', 'NTC')	BjSA	NTC
3069	EX_4hbz_e	GSMM_048	EX_5drib_e	GSMM_259	EX_g6p_B_e	('BjSA', 'NTC')	BjSA	NTC
3077	EX_4hbz_e	GSMM_091	EX_5drib_e	GSMM_259	EX_g6p_B_e	('BjSA', 'NTC')	BjSA	NTC
3081	EX_4hbz_e	GSMM_105	EX_5drib_e	GSMM_259	EX_g6p_B_e	('BjSA', 'NTC')	BjSA	NTC
3087	EX_4hbz_e	GSMM_155	EX_5drib_e	GSMM_259	EX_g6p_B_e	('BjSA', 'NTC')	BjSA	NTC
3088	EX_4hbz_e	GSMM_159	EX_5drib_e	GSMM_259	EX_g6p_B_e	('BjSA', 'NTC')	BjSA	NTC
3090	EX_4hbz_e	GSMM_166	EX_5drib_e	GSMM_259	EX_g6p_B_e	('BjSA', 'NTC')	BjSA	NTC
3091	EX_4hbz_e	GSMM_176	EX_5drib_e	GSMM_259	EX_g6p_B_e	('BjSA', 'NTC')	BjSA	NTC
3094	EX_4hbz_e	GSMM_208	EX_5drib_e	GSMM_259	EX_g6p_B_e	('BjSA', 'NTC')	BjSA	NTC
3099	EX_4hbz_e	GSMM_244	EX_5drib_e	GSMM_259	EX_g6p_B_e	('BjSA', 'NTC')	BjSA	NTC
3107	EX_4hbz_e	GSMM_314	EX_5drib_e	GSMM_259	EX_g6p_B_e	('BjSA', 'NTC')	BjSA	NTC
3113	EX_4hbz_e	GSMM_354	EX_5drib_e	GSMM_259	EX_g6p_B_e	('BjSA', 'NTC')	BjSA	NTC
3124	EX_4hbz_e	GSMM_048	EX_for_e	GSMM_259	EX_g6p_B_e	('BjSA', 'NTC')	BjSA	NTC
3132	EX_4hbz_e	GSMM_155	EX_for_e	GSMM_259	EX_g6p_B_e	('BjSA', 'NTC')	BjSA	NTC
3134	EX_4hbz_e	GSMM_176	EX_for_e	GSMM_259	EX_g6p_B_e	('BjSA', 'NTC')	BjSA	NTC
3146	EX_4hbz_e	GSMM_011	EX_glyc3p_e	GSMM_259	EX_g6p_B_e	('BjSA', 'NTC')	BjSA	NTC
3147	EX_4hbz_e	GSMM_014	EX_glyc3p_e	GSMM_259	EX_g6p_B_e	('BjSA', 'NTC')	BjSA	NTC
3149	EX_4hbz_e	GSMM_017	EX_glyc3p_e	GSMM_259	EX_g6p_B_e	('BjSA', 'NTC')	BjSA	NTC
3154	EX_4hbz_e	GSMM_105	EX_glyc3p_e	GSMM_259	EX_g6p_B_e	('BjSA', 'NTC')	BjSA	NTC
3158	EX_4hbz_e	GSMM_155	EX_glyc3p_e	GSMM_259	EX_g6p_B_e	('BjSA', 'NTC')	BjSA	NTC
3160	EX_4hbz_e	GSMM_176	EX_glyc3p_e	GSMM_259	EX_g6p_B_e	('BjSA', 'NTC')	BjSA	NTC
3162	EX_4hbz_e	GSMM_208	EX_glyc3p_e	GSMM_259	EX_g6p_B_e	('BjSA', 'NTC')	BjSA	NTC
3175	EX_4hbz_e	GSMM_354	EX_glyc3p_e	GSMM_259	EX_g6p_B_e	('BjSA', 'NTC')	BjSA	NTC
3179	EX_4hbz_e	GSMM_014	EX_5mdru1p_e	GSMM_259	EX_g6p_B_e	('BjSA', 'NTC')	BjSA	NTC
3182	EX_4hbz_e	GSMM_048	EX_5mdru1p_e	GSMM_259	EX_g6p_B_e	('BjSA', 'NTC')	BjSA	NTC
3186	EX_4hbz_e	GSMM_091	EX_5mdru1p_e	GSMM_259	EX_g6p_B_e	('BjSA', 'NTC')	BjSA	NTC
3189	EX_4hbz_e	GSMM_105	EX_5mdru1p_e	GSMM_259	EX_g6p_B_e	('BjSA', 'NTC')	BjSA	NTC
3193	EX_4hbz_e	GSMM_159	EX_5mdru1p_e	GSMM_259	EX_g6p_B_e	('BjSA', 'NTC')	BjSA	NTC
3194	EX_4hbz_e	GSMM_166	EX_5mdru1p_e	GSMM_259	EX_g6p_B_e	('BjSA', 'NTC')	BjSA	NTC
3197	EX_4hbz_e	GSMM_208	EX_5mdru1p_e	GSMM_259	EX_g6p_B_e	('BjSA', 'NTC')	BjSA	NTC
3204	EX_4hbz_e	GSMM_354	EX_5mdru1p_e	GSMM_259	EX_g6p_B_e	('BjSA', 'NTC')	BjSA	NTC
3210	EX_4hbz_e	GSMM_011	EX_fald_e	GSMM_259	EX_g6p_B_e	('BjSA', 'NTC')	BjSA	NTC
3211	EX_4hbz_e	GSMM_014	EX_fald_e	GSMM_259	EX_g6p_B_e	('BjSA', 'NTC')	BjSA	NTC
3214	EX_4hbz_e	GSMM_017	EX_fald_e	GSMM_259	EX_g6p_B_e	('BjSA', 'NTC')	BjSA	NTC
3220	EX_4hbz_e	GSMM_048	EX_fald_e	GSMM_259	EX_g6p_B_e	('BjSA', 'NTC')	BjSA	NTC
3228	EX_4hbz_e	GSMM_091	EX_fald_e	GSMM_259	EX_g6p_B_e	('BjSA', 'NTC')	BjSA	NTC
3231	EX_4hbz_e	GSMM_105	EX_fald_e	GSMM_259	EX_g6p_B_e	('BjSA', 'NTC')	BjSA	NTC
3238	EX_4hbz_e	GSMM_159	EX_fald_e	GSMM_259	EX_g6p_B_e	('BjSA', 'NTC')	BjSA	NTC
3240	EX_4hbz_e	GSMM_166	EX_fald_e	GSMM_259	EX_g6p_B_e	('BjSA', 'NTC')	BjSA	NTC
3241	EX_4hbz_e	GSMM_170	EX_fald_e	GSMM_259	EX_g6p_B_e	('BjSA', 'NTC')	BjSA	NTC
3242	EX_4hbz_e	GSMM_176	EX_fald_e	GSMM_259	EX_g6p_B_e	('BjSA', 'NTC')	BjSA	NTC
3245	EX_4hbz_e	GSMM_208	EX_fald_e	GSMM_259	EX_g6p_B_e	('BjSA', 'NTC')	BjSA	NTC
3250	EX_4hbz_e	GSMM_244	EX_fald_e	GSMM_259	EX_g6p_B_e	('BjSA', 'NTC')	BjSA	NTC
3259	EX_4hbz_e	GSMM_314	EX_fald_e	GSMM_259	EX_g6p_B_e	('BjSA', 'NTC')	BjSA	NTC
3266	EX_4hbz_e	GSMM_354	EX_fald_e	GSMM_259	EX_g6p_B_e	('BjSA', 'NTC')	BjSA	NTC
3275	EX_4hbz_e	GSMM_011	EX_ptrc_e	GSMM_259	EX_g6p_B_e	('BjSA', 'NTC')	BjSA	NTC
3281	EX_4hbz_e	GSMM_048	EX_ptrc_e	GSMM_259	EX_g6p_B_e	('BjSA', 'NTC')	BjSA	NTC
3289	EX_4hbz_e	GSMM_105	EX_ptrc_e	GSMM_259	EX_g6p_B_e	('BjSA', 'NTC')	BjSA	NTC
3293	EX_4hbz_e	GSMM_155	EX_ptrc_e	GSMM_259	EX_g6p_B_e	('BjSA', 'NTC')	BjSA	NTC
3295	EX_4hbz_e	GSMM_159	EX_ptrc_e	GSMM_259	EX_g6p_B_e	('BjSA', 'NTC')	BjSA	NTC
3297	EX_4hbz_e	GSMM_166	EX_ptrc_e	GSMM_259	EX_g6p_B_e	('BjSA', 'NTC')	BjSA	NTC
3298	EX_4hbz_e	GSMM_176	EX_ptrc_e	GSMM_259	EX_g6p_B_e	('BjSA', 'NTC')	BjSA	NTC
3301	EX_4hbz_e	GSMM_208	EX_ptrc_e	GSMM_259	EX_g6p_B_e	('BjSA', 'NTC')	BjSA	NTC
3305	EX_4hbz_e	GSMM_244	EX_ptrc_e	GSMM_259	EX_g6p_B_e	('BjSA', 'NTC')	BjSA	NTC
3311	EX_4hbz_e	GSMM_314	EX_ptrc_e	GSMM_259	EX_g6p_B_e	('BjSA', 'NTC')	BjSA	NTC
3317	EX_4hbz_e	GSMM_354	EX_ptrc_e	GSMM_259	EX_g6p_B_e	('BjSA', 'NTC')	BjSA	NTC
3324	EX_4hbz_e	GSMM_011	EX_rib__D_e	GSMM_259	EX_g6p_B_e	('BjSA', 'NTC')	BjSA	NTC
3325	EX_4hbz_e	GSMM_014	EX_rib__D_e	GSMM_259	EX_g6p_B_e	('BjSA', 'NTC')	BjSA	NTC
3331	EX_4hbz_e	GSMM_048	EX_rib__D_e	GSMM_259	EX_g6p_B_e	('BjSA', 'NTC')	BjSA	NTC
3336	EX_4hbz_e	GSMM_091	EX_rib__D_e	GSMM_259	EX_g6p_B_e	('BjSA', 'NTC')	BjSA	NTC
3345	EX_4hbz_e	GSMM_170	EX_rib__D_e	GSMM_259	EX_g6p_B_e	('BjSA', 'NTC')	BjSA	NTC
3346	EX_4hbz_e	GSMM_176	EX_rib__D_e	GSMM_259	EX_g6p_B_e	('BjSA', 'NTC')	BjSA	NTC
3349	EX_4hbz_e	GSMM_208	EX_rib__D_e	GSMM_259	EX_g6p_B_e	('BjSA', 'NTC')	BjSA	NTC
3360	EX_4hbz_e	GSMM_314	EX_rib__D_e	GSMM_259	EX_g6p_B_e	('BjSA', 'NTC')	BjSA	NTC
3367	EX_4hbz_e	GSMM_354	EX_rib__D_e	GSMM_259	EX_g6p_B_e	('BjSA', 'NTC')	BjSA	NTC
3375	EX_4hbz_e	GSMM_014	EX_actn__R_e	GSMM_259	EX_g6p_B_e	('BjSA', 'NTC')	BjSA	NTC
3383	EX_4hbz_e	GSMM_091	EX_actn__R_e	GSMM_259	EX_g6p_B_e	('BjSA', 'NTC')	BjSA	NTC
3385	EX_4hbz_e	GSMM_105	EX_actn__R_e	GSMM_259	EX_g6p_B_e	('BjSA', 'NTC')	BjSA	NTC
3387	EX_4hbz_e	GSMM_155	EX_actn__R_e	GSMM_259	EX_g6p_B_e	('BjSA', 'NTC')	BjSA	NTC
3388	EX_4hbz_e	GSMM_166	EX_actn__R_e	GSMM_259	EX_g6p_B_e	('BjSA', 'NTC')	BjSA	NTC
3389	EX_4hbz_e	GSMM_176	EX_actn__R_e	GSMM_259	EX_g6p_B_e	('BjSA', 'NTC')	BjSA	NTC
3397	EX_4hbz_e	GSMM_354	EX_actn__R_e	GSMM_259	EX_g6p_B_e	('BjSA', 'NTC')	BjSA	NTC
3403	EX_4hbz_e	GSMM_014	EX_spmd_e	GSMM_259	EX_g6p_B_e	('BjSA', 'NTC')	BjSA	NTC
3406	EX_4hbz_e	GSMM_017	EX_spmd_e	GSMM_259	EX_g6p_B_e	('BjSA', 'NTC')	BjSA	NTC
3410	EX_4hbz_e	GSMM_048	EX_spmd_e	GSMM_259	EX_g6p_B_e	('BjSA', 'NTC')	BjSA	NTC
3417	EX_4hbz_e	GSMM_091	EX_spmd_e	GSMM_259	EX_g6p_B_e	('BjSA', 'NTC')	BjSA	NTC
3420	EX_4hbz_e	GSMM_105	EX_spmd_e	GSMM_259	EX_g6p_B_e	('BjSA', 'NTC')	BjSA	NTC
3426	EX_4hbz_e	GSMM_159	EX_spmd_e	GSMM_259	EX_g6p_B_e	('BjSA', 'NTC')	BjSA	NTC
3429	EX_4hbz_e	GSMM_166	EX_spmd_e	GSMM_259	EX_g6p_B_e	('BjSA', 'NTC')	BjSA	NTC
3430	EX_4hbz_e	GSMM_170	EX_spmd_e	GSMM_259	EX_g6p_B_e	('BjSA', 'NTC')	BjSA	NTC
3432	EX_4hbz_e	GSMM_208	EX_spmd_e	GSMM_259	EX_g6p_B_e	('BjSA', 'NTC')	BjSA	NTC
3441	EX_4hbz_e	GSMM_314	EX_spmd_e	GSMM_259	EX_g6p_B_e	('BjSA', 'NTC')	BjSA	NTC
3445	EX_4hbz_e	GSMM_354	EX_spmd_e	GSMM_259	EX_g6p_B_e	('BjSA', 'NTC')	BjSA	NTC
3452	EX_4hbz_e	GSMM_011	EX_glyc_e	GSMM_259	EX_g6p_B_e	('BjSA', 'NTC')	BjSA	NTC
3453	EX_4hbz_e	GSMM_014	EX_glyc_e	GSMM_259	EX_g6p_B_e	('BjSA', 'NTC')	BjSA	NTC
3456	EX_4hbz_e	GSMM_017	EX_glyc_e	GSMM_259	EX_g6p_B_e	('BjSA', 'NTC')	BjSA	NTC
3462	EX_4hbz_e	GSMM_048	EX_glyc_e	GSMM_259	EX_g6p_B_e	('BjSA', 'NTC')	BjSA	NTC
3469	EX_4hbz_e	GSMM_091	EX_glyc_e	GSMM_259	EX_g6p_B_e	('BjSA', 'NTC')	BjSA	NTC
3473	EX_4hbz_e	GSMM_105	EX_glyc_e	GSMM_259	EX_g6p_B_e	('BjSA', 'NTC')	BjSA	NTC
3478	EX_4hbz_e	GSMM_155	EX_glyc_e	GSMM_259	EX_g6p_B_e	('BjSA', 'NTC')	BjSA	NTC
3480	EX_4hbz_e	GSMM_159	EX_glyc_e	GSMM_259	EX_g6p_B_e	('BjSA', 'NTC')	BjSA	NTC
3483	EX_4hbz_e	GSMM_166	EX_glyc_e	GSMM_259	EX_g6p_B_e	('BjSA', 'NTC')	BjSA	NTC
3484	EX_4hbz_e	GSMM_176	EX_glyc_e	GSMM_259	EX_g6p_B_e	('BjSA', 'NTC')	BjSA	NTC
3487	EX_4hbz_e	GSMM_208	EX_glyc_e	GSMM_259	EX_g6p_B_e	('BjSA', 'NTC')	BjSA	NTC
3492	EX_4hbz_e	GSMM_244	EX_glyc_e	GSMM_259	EX_g6p_B_e	('BjSA', 'NTC')	BjSA	NTC
3500	EX_4hbz_e	GSMM_314	EX_glyc_e	GSMM_259	EX_g6p_B_e	('BjSA', 'NTC')	BjSA	NTC
3507	EX_4hbz_e	GSMM_354	EX_glyc_e	GSMM_259	EX_g6p_B_e	('BjSA', 'NTC')	BjSA	NTC
3516	EX_4hbz_e	GSMM_011	EX_fe3pyovd_kt_e	GSMM_259	EX_g6p_B_e	('BjSA', 'NTC')	BjSA	NTC
3517	EX_4hbz_e	GSMM_014	EX_fe3pyovd_kt_e	GSMM_259	EX_g6p_B_e	('BjSA', 'NTC')	BjSA	NTC
3520	EX_4hbz_e	GSMM_017	EX_fe3pyovd_kt_e	GSMM_259	EX_g6p_B_e	('BjSA', 'NTC')	BjSA	NTC
3526	EX_4hbz_e	GSMM_048	EX_fe3pyovd_kt_e	GSMM_259	EX_g6p_B_e	('BjSA', 'NTC')	BjSA	NTC
3534	EX_4hbz_e	GSMM_091	EX_fe3pyovd_kt_e	GSMM_259	EX_g6p_B_e	('BjSA', 'NTC')	BjSA	NTC
3538	EX_4hbz_e	GSMM_105	EX_fe3pyovd_kt_e	GSMM_259	EX_g6p_B_e	('BjSA', 'NTC')	BjSA	NTC
3544	EX_4hbz_e	GSMM_155	EX_fe3pyovd_kt_e	GSMM_259	EX_g6p_B_e	('BjSA', 'NTC')	BjSA	NTC
3546	EX_4hbz_e	GSMM_159	EX_fe3pyovd_kt_e	GSMM_259	EX_g6p_B_e	('BjSA', 'NTC')	BjSA	NTC
3549	EX_4hbz_e	GSMM_166	EX_fe3pyovd_kt_e	GSMM_259	EX_g6p_B_e	('BjSA', 'NTC')	BjSA	NTC
3550	EX_4hbz_e	GSMM_170	EX_fe3pyovd_kt_e	GSMM_259	EX_g6p_B_e	('BjSA', 'NTC')	BjSA	NTC
3551	EX_4hbz_e	GSMM_176	EX_fe3pyovd_kt_e	GSMM_259	EX_g6p_B_e	('BjSA', 'NTC')	BjSA	NTC
3554	EX_4hbz_e	GSMM_208	EX_fe3pyovd_kt_e	GSMM_259	EX_g6p_B_e	('BjSA', 'NTC')	BjSA	NTC
3559	EX_4hbz_e	GSMM_244	EX_fe3pyovd_kt_e	GSMM_259	EX_g6p_B_e	('BjSA', 'NTC')	BjSA	NTC
3568	EX_4hbz_e	GSMM_314	EX_fe3pyovd_kt_e	GSMM_259	EX_g6p_B_e	('BjSA', 'NTC')	BjSA	NTC
3575	EX_4hbz_e	GSMM_354	EX_fe3pyovd_kt_e	GSMM_259	EX_g6p_B_e	('BjSA', 'NTC')	BjSA	NTC
3584	EX_4hbz_e	GSMM_011	EX_pyovd_kt_e	GSMM_259	EX_g6p_B_e	('BjSA', 'NTC')	BjSA	NTC
3585	EX_4hbz_e	GSMM_014	EX_pyovd_kt_e	GSMM_259	EX_g6p_B_e	('BjSA', 'NTC')	BjSA	NTC
3588	EX_4hbz_e	GSMM_017	EX_pyovd_kt_e	GSMM_259	EX_g6p_B_e	('BjSA', 'NTC')	BjSA	NTC
3594	EX_4hbz_e	GSMM_048	EX_pyovd_kt_e	GSMM_259	EX_g6p_B_e	('BjSA', 'NTC')	BjSA	NTC
3602	EX_4hbz_e	GSMM_091	EX_pyovd_kt_e	GSMM_259	EX_g6p_B_e	('BjSA', 'NTC')	BjSA	NTC
3606	EX_4hbz_e	GSMM_105	EX_pyovd_kt_e	GSMM_259	EX_g6p_B_e	('BjSA', 'NTC')	BjSA	NTC
3612	EX_4hbz_e	GSMM_155	EX_pyovd_kt_e	GSMM_259	EX_g6p_B_e	('BjSA', 'NTC')	BjSA	NTC
3614	EX_4hbz_e	GSMM_159	EX_pyovd_kt_e	GSMM_259	EX_g6p_B_e	('BjSA', 'NTC')	BjSA	NTC
3617	EX_4hbz_e	GSMM_166	EX_pyovd_kt_e	GSMM_259	EX_g6p_B_e	('BjSA', 'NTC')	BjSA	NTC
3618	EX_4hbz_e	GSMM_170	EX_pyovd_kt_e	GSMM_259	EX_g6p_B_e	('BjSA', 'NTC')	BjSA	NTC
3619	EX_4hbz_e	GSMM_176	EX_pyovd_kt_e	GSMM_259	EX_g6p_B_e	('BjSA', 'NTC')	BjSA	NTC
3622	EX_4hbz_e	GSMM_208	EX_pyovd_kt_e	GSMM_259	EX_g6p_B_e	('BjSA', 'NTC')	BjSA	NTC
3627	EX_4hbz_e	GSMM_244	EX_pyovd_kt_e	GSMM_259	EX_g6p_B_e	('BjSA', 'NTC')	BjSA	NTC
3636	EX_4hbz_e	GSMM_314	EX_pyovd_kt_e	GSMM_259	EX_g6p_B_e	('BjSA', 'NTC')	BjSA	NTC
3643	EX_4hbz_e	GSMM_354	EX_pyovd_kt_e	GSMM_259	EX_g6p_B_e	('BjSA', 'NTC')	BjSA	NTC
3652	EX_4hbz_e	GSMM_017	EX_cellb_e	GSMM_259	EX_g6p_B_e	('BjSA', 'NTC')	BjSA	NTC
3655	EX_4hbz_e	GSMM_105	EX_cellb_e	GSMM_259	EX_g6p_B_e	('BjSA', 'NTC')	BjSA	NTC
3656	EX_4hbz_e	GSMM_155	EX_cellb_e	GSMM_259	EX_g6p_B_e	('BjSA', 'NTC')	BjSA	NTC
3657	EX_4hbz_e	GSMM_159	EX_cellb_e	GSMM_259	EX_g6p_B_e	('BjSA', 'NTC')	BjSA	NTC
3659	EX_4hbz_e	GSMM_011	EX_ser__L_e	GSMM_259	EX_g6p_B_e	('BjSA', 'NTC')	BjSA	NTC
3660	EX_4hbz_e	GSMM_014	EX_ser__L_e	GSMM_259	EX_g6p_B_e	('BjSA', 'NTC')	BjSA	NTC
3662	EX_4hbz_e	GSMM_017	EX_ser__L_e	GSMM_259	EX_g6p_B_e	('BjSA', 'NTC')	BjSA	NTC
3665	EX_4hbz_e	GSMM_048	EX_ser__L_e	GSMM_259	EX_g6p_B_e	('BjSA', 'NTC')	BjSA	NTC
3674	EX_4hbz_e	GSMM_155	EX_ser__L_e	GSMM_259	EX_g6p_B_e	('BjSA', 'NTC')	BjSA	NTC
3676	EX_4hbz_e	GSMM_166	EX_ser__L_e	GSMM_259	EX_g6p_B_e	('BjSA', 'NTC')	BjSA	NTC
3678	EX_4hbz_e	GSMM_208	EX_ser__L_e	GSMM_259	EX_g6p_B_e	('BjSA', 'NTC')	BjSA	NTC
3691	EX_4hbz_e	GSMM_354	EX_ser__L_e	GSMM_259	EX_g6p_B_e	('BjSA', 'NTC')	BjSA	NTC
3696	EX_4hbz_e	GSMM_011	EX_urea_e	GSMM_259	EX_g6p_B_e	('BjSA', 'NTC')	BjSA	NTC
3697	EX_4hbz_e	GSMM_014	EX_urea_e	GSMM_259	EX_g6p_B_e	('BjSA', 'NTC')	BjSA	NTC
3705	EX_4hbz_e	GSMM_048	EX_urea_e	GSMM_259	EX_g6p_B_e	('BjSA', 'NTC')	BjSA	NTC
3711	EX_4hbz_e	GSMM_091	EX_urea_e	GSMM_259	EX_g6p_B_e	('BjSA', 'NTC')	BjSA	NTC
3715	EX_4hbz_e	GSMM_105	EX_urea_e	GSMM_259	EX_g6p_B_e	('BjSA', 'NTC')	BjSA	NTC
3722	EX_4hbz_e	GSMM_166	EX_urea_e	GSMM_259	EX_g6p_B_e	('BjSA', 'NTC')	BjSA	NTC
3723	EX_4hbz_e	GSMM_176	EX_urea_e	GSMM_259	EX_g6p_B_e	('BjSA', 'NTC')	BjSA	NTC
3728	EX_4hbz_e	GSMM_244	EX_urea_e	GSMM_259	EX_g6p_B_e	('BjSA', 'NTC')	BjSA	NTC
3737	EX_4hbz_e	GSMM_314	EX_urea_e	GSMM_259	EX_g6p_B_e	('BjSA', 'NTC')	BjSA	NTC
3743	EX_4hbz_e	GSMM_354	EX_urea_e	GSMM_259	EX_g6p_B_e	('BjSA', 'NTC')	BjSA	NTC
3751	EX_4hbz_e	GSMM_014	EX_inost_e	GSMM_259	EX_g6p_B_e	('BjSA', 'NTC')	BjSA	NTC
3754	EX_4hbz_e	GSMM_017	EX_inost_e	GSMM_259	EX_g6p_B_e	('BjSA', 'NTC')	BjSA	NTC
3756	EX_4hbz_e	GSMM_048	EX_inost_e	GSMM_259	EX_g6p_B_e	('BjSA', 'NTC')	BjSA	NTC
3761	EX_4hbz_e	GSMM_105	EX_inost_e	GSMM_259	EX_g6p_B_e	('BjSA', 'NTC')	BjSA	NTC
3764	EX_4hbz_e	GSMM_155	EX_inost_e	GSMM_259	EX_g6p_B_e	('BjSA', 'NTC')	BjSA	NTC
3767	EX_4hbz_e	GSMM_166	EX_inost_e	GSMM_259	EX_g6p_B_e	('BjSA', 'NTC')	BjSA	NTC
3768	EX_4hbz_e	GSMM_170	EX_inost_e	GSMM_259	EX_g6p_B_e	('BjSA', 'NTC')	BjSA	NTC
3769	EX_4hbz_e	GSMM_208	EX_inost_e	GSMM_259	EX_g6p_B_e	('BjSA', 'NTC')	BjSA	NTC
3774	EX_4hbz_e	GSMM_354	EX_inost_e	GSMM_259	EX_g6p_B_e	('BjSA', 'NTC')	BjSA	NTC
3777	EX_4hbz_e	GSMM_011	EX_chol_e	GSMM_259	EX_g6p_B_e	('BjSA', 'NTC')	BjSA	NTC
3778	EX_4hbz_e	GSMM_014	EX_chol_e	GSMM_259	EX_g6p_B_e	('BjSA', 'NTC')	BjSA	NTC
3780	EX_4hbz_e	GSMM_017	EX_chol_e	GSMM_259	EX_g6p_B_e	('BjSA', 'NTC')	BjSA	NTC
3786	EX_4hbz_e	GSMM_105	EX_chol_e	GSMM_259	EX_g6p_B_e	('BjSA', 'NTC')	BjSA	NTC
3789	EX_4hbz_e	GSMM_155	EX_chol_e	GSMM_259	EX_g6p_B_e	('BjSA', 'NTC')	BjSA	NTC
3791	EX_4hbz_e	GSMM_166	EX_chol_e	GSMM_259	EX_g6p_B_e	('BjSA', 'NTC')	BjSA	NTC
3793	EX_4hbz_e	GSMM_208	EX_chol_e	GSMM_259	EX_g6p_B_e	('BjSA', 'NTC')	BjSA	NTC
3808	EX_4hbz_e	GSMM_354	EX_chol_e	GSMM_259	EX_g6p_B_e	('BjSA', 'NTC')	BjSA	NTC
3812	EX_4hbz_e	GSMM_011	EX_glyald_e	GSMM_259	EX_g6p_B_e	('BjSA', 'NTC')	BjSA	NTC
3817	EX_4hbz_e	GSMM_091	EX_glyald_e	GSMM_259	EX_g6p_B_e	('BjSA', 'NTC')	BjSA	NTC
3820	EX_4hbz_e	GSMM_105	EX_glyald_e	GSMM_259	EX_g6p_B_e	('BjSA', 'NTC')	BjSA	NTC
3823	EX_4hbz_e	GSMM_159	EX_glyald_e	GSMM_259	EX_g6p_B_e	('BjSA', 'NTC')	BjSA	NTC
3826	EX_4hbz_e	GSMM_166	EX_glyald_e	GSMM_259	EX_g6p_B_e	('BjSA', 'NTC')	BjSA	NTC
3827	EX_4hbz_e	GSMM_170	EX_glyald_e	GSMM_259	EX_g6p_B_e	('BjSA', 'NTC')	BjSA	NTC
3844	EX_4hbz_e	GSMM_011	EX_ura_e	GSMM_259	EX_g6p_B_e	('BjSA', 'NTC')	BjSA	NTC
3845	EX_4hbz_e	GSMM_017	EX_ura_e	GSMM_259	EX_g6p_B_e	('BjSA', 'NTC')	BjSA	NTC
3850	EX_4hbz_e	GSMM_048	EX_ura_e	GSMM_259	EX_g6p_B_e	('BjSA', 'NTC')	BjSA	NTC
3855	EX_4hbz_e	GSMM_155	EX_ura_e	GSMM_259	EX_g6p_B_e	('BjSA', 'NTC')	BjSA	NTC
3858	EX_4hbz_e	GSMM_170	EX_ura_e	GSMM_259	EX_g6p_B_e	('BjSA', 'NTC')	BjSA	NTC
3859	EX_4hbz_e	GSMM_176	EX_ura_e	GSMM_259	EX_g6p_B_e	('BjSA', 'NTC')	BjSA	NTC
3861	EX_4hbz_e	GSMM_244	EX_ura_e	GSMM_259	EX_g6p_B_e	('BjSA', 'NTC')	BjSA	NTC
3865	EX_4hbz_e	GSMM_314	EX_ura_e	GSMM_259	EX_g6p_B_e	('BjSA', 'NTC')	BjSA	NTC
3870	EX_4hbz_e	GSMM_011	EX_gal_e	GSMM_259	EX_g6p_B_e	('BjSA', 'NTC')	BjSA	NTC
3871	EX_4hbz_e	GSMM_017	EX_gal_e	GSMM_259	EX_g6p_B_e	('BjSA', 'NTC')	BjSA	NTC
3876	EX_4hbz_e	GSMM_048	EX_gal_e	GSMM_259	EX_g6p_B_e	('BjSA', 'NTC')	BjSA	NTC
3881	EX_4hbz_e	GSMM_091	EX_gal_e	GSMM_259	EX_g6p_B_e	('BjSA', 'NTC')	BjSA	NTC
3890	EX_4hbz_e	GSMM_170	EX_gal_e	GSMM_259	EX_g6p_B_e	('BjSA', 'NTC')	BjSA	NTC
3891	EX_4hbz_e	GSMM_208	EX_gal_e	GSMM_259	EX_g6p_B_e	('BjSA', 'NTC')	BjSA	NTC
3896	EX_4hbz_e	GSMM_244	EX_gal_e	GSMM_259	EX_g6p_B_e	('BjSA', 'NTC')	BjSA	NTC
3906	EX_4hbz_e	GSMM_354	EX_gal_e	GSMM_259	EX_g6p_B_e	('BjSA', 'NTC')	BjSA	NTC
3911	EX_4hbz_e	GSMM_011	EX_gua_e	GSMM_259	EX_g6p_B_e	('BjSA', 'NTC')	BjSA	NTC
3912	EX_4hbz_e	GSMM_017	EX_gua_e	GSMM_259	EX_g6p_B_e	('BjSA', 'NTC')	BjSA	NTC
3920	EX_4hbz_e	GSMM_170	EX_gua_e	GSMM_259	EX_g6p_B_e	('BjSA', 'NTC')	BjSA	NTC
3930	EX_4hbz_e	GSMM_011	EX_mththf_e	GSMM_259	EX_g6p_B_e	('BjSA', 'NTC')	BjSA	NTC
3938	EX_4hbz_e	GSMM_170	EX_mththf_e	GSMM_259	EX_g6p_B_e	('BjSA', 'NTC')	BjSA	NTC
3944	EX_4hbz_e	GSMM_011	EX_ind3ac_e	GSMM_259	EX_g6p_B_e	('BjSA', 'NTC')	BjSA	NTC
3945	EX_4hbz_e	GSMM_014	EX_ind3ac_e	GSMM_259	EX_g6p_B_e	('BjSA', 'NTC')	BjSA	NTC
3948	EX_4hbz_e	GSMM_017	EX_ind3ac_e	GSMM_259	EX_g6p_B_e	('BjSA', 'NTC')	BjSA	NTC
3953	EX_4hbz_e	GSMM_048	EX_ind3ac_e	GSMM_259	EX_g6p_B_e	('BjSA', 'NTC')	BjSA	NTC
3961	EX_4hbz_e	GSMM_091	EX_ind3ac_e	GSMM_259	EX_g6p_B_e	('BjSA', 'NTC')	BjSA	NTC
3964	EX_4hbz_e	GSMM_105	EX_ind3ac_e	GSMM_259	EX_g6p_B_e	('BjSA', 'NTC')	BjSA	NTC
3970	EX_4hbz_e	GSMM_166	EX_ind3ac_e	GSMM_259	EX_g6p_B_e	('BjSA', 'NTC')	BjSA	NTC
3971	EX_4hbz_e	GSMM_176	EX_ind3ac_e	GSMM_259	EX_g6p_B_e	('BjSA', 'NTC')	BjSA	NTC
3973	EX_4hbz_e	GSMM_208	EX_ind3ac_e	GSMM_259	EX_g6p_B_e	('BjSA', 'NTC')	BjSA	NTC
3977	EX_4hbz_e	GSMM_244	EX_ind3ac_e	GSMM_259	EX_g6p_B_e	('BjSA', 'NTC')	BjSA	NTC
3985	EX_4hbz_e	GSMM_314	EX_ind3ac_e	GSMM_259	EX_g6p_B_e	('BjSA', 'NTC')	BjSA	NTC
3992	EX_4hbz_e	GSMM_354	EX_ind3ac_e	GSMM_259	EX_g6p_B_e	('BjSA', 'NTC')	BjSA	NTC
3998	EX_4hbz_e	GSMM_011	EX_etha_e	GSMM_259	EX_g6p_B_e	('BjSA', 'NTC')	BjSA	NTC
4001	EX_4hbz_e	GSMM_048	EX_etha_e	GSMM_259	EX_g6p_B_e	('BjSA', 'NTC')	BjSA	NTC
4007	EX_4hbz_e	GSMM_105	EX_etha_e	GSMM_259	EX_g6p_B_e	('BjSA', 'NTC')	BjSA	NTC
4011	EX_4hbz_e	GSMM_155	EX_etha_e	GSMM_259	EX_g6p_B_e	('BjSA', 'NTC')	BjSA	NTC
4013	EX_4hbz_e	GSMM_166	EX_etha_e	GSMM_259	EX_g6p_B_e	('BjSA', 'NTC')	BjSA	NTC
4014	EX_4hbz_e	GSMM_170	EX_etha_e	GSMM_259	EX_g6p_B_e	('BjSA', 'NTC')	BjSA	NTC
4015	EX_4hbz_e	GSMM_176	EX_etha_e	GSMM_259	EX_g6p_B_e	('BjSA', 'NTC')	BjSA	NTC
4016	EX_4hbz_e	GSMM_244	EX_etha_e	GSMM_259	EX_g6p_B_e	('BjSA', 'NTC')	BjSA	NTC
4028	EX_4hbz_e	GSMM_011	EX_orn_e	GSMM_259	EX_g6p_B_e	('BjSA', 'NTC')	BjSA	NTC
4029	EX_4hbz_e	GSMM_014	EX_orn_e	GSMM_259	EX_g6p_B_e	('BjSA', 'NTC')	BjSA	NTC
4039	EX_4hbz_e	GSMM_105	EX_orn_e	GSMM_259	EX_g6p_B_e	('BjSA', 'NTC')	BjSA	NTC
4043	EX_4hbz_e	GSMM_155	EX_orn_e	GSMM_259	EX_g6p_B_e	('BjSA', 'NTC')	BjSA	NTC
4046	EX_4hbz_e	GSMM_166	EX_orn_e	GSMM_259	EX_g6p_B_e	('BjSA', 'NTC')	BjSA	NTC
4047	EX_4hbz_e	GSMM_176	EX_orn_e	GSMM_259	EX_g6p_B_e	('BjSA', 'NTC')	BjSA	NTC
4057	EX_4hbz_e	GSMM_354	EX_orn_e	GSMM_259	EX_g6p_B_e	('BjSA', 'NTC')	BjSA	NTC
4063	EX_4hbz_e	GSMM_014	EX_gthrd_e	GSMM_259	EX_g6p_B_e	('BjSA', 'NTC')	BjSA	NTC
4072	EX_4hbz_e	GSMM_159	EX_gthrd_e	GSMM_259	EX_g6p_B_e	('BjSA', 'NTC')	BjSA	NTC
4073	EX_4hbz_e	GSMM_166	EX_gthrd_e	GSMM_259	EX_g6p_B_e	('BjSA', 'NTC')	BjSA	NTC
4082	EX_4hbz_e	GSMM_014	EX_pacald_e	GSMM_259	EX_g6p_B_e	('BjSA', 'NTC')	BjSA	NTC
4084	EX_4hbz_e	GSMM_017	EX_pacald_e	GSMM_259	EX_g6p_B_e	('BjSA', 'NTC')	BjSA	NTC
4085	EX_4hbz_e	GSMM_048	EX_pacald_e	GSMM_259	EX_g6p_B_e	('BjSA', 'NTC')	BjSA	NTC
4087	EX_4hbz_e	GSMM_105	EX_pacald_e	GSMM_259	EX_g6p_B_e	('BjSA', 'NTC')	BjSA	NTC
4088	EX_4hbz_e	GSMM_155	EX_pacald_e	GSMM_259	EX_g6p_B_e	('BjSA', 'NTC')	BjSA	NTC
4089	EX_4hbz_e	GSMM_159	EX_pacald_e	GSMM_259	EX_g6p_B_e	('BjSA', 'NTC')	BjSA	NTC
4091	EX_4hbz_e	GSMM_166	EX_pacald_e	GSMM_259	EX_g6p_B_e	('BjSA', 'NTC')	BjSA	NTC
4096	EX_4hbz_e	GSMM_244	EX_pacald_e	GSMM_259	EX_g6p_B_e	('BjSA', 'NTC')	BjSA	NTC
4099	EX_4hbz_e	GSMM_314	EX_pacald_e	GSMM_259	EX_g6p_B_e	('BjSA', 'NTC')	BjSA	NTC
4104	EX_4hbz_e	GSMM_014	EX_pea_e	GSMM_259	EX_g6p_B_e	('BjSA', 'NTC')	BjSA	NTC
4107	EX_4hbz_e	GSMM_048	EX_pea_e	GSMM_259	EX_g6p_B_e	('BjSA', 'NTC')	BjSA	NTC
4112	EX_4hbz_e	GSMM_170	EX_pea_e	GSMM_259	EX_g6p_B_e	('BjSA', 'NTC')	BjSA	NTC
4119	EX_4hbz_e	GSMM_014	EX_glu__L_e	GSMM_259	EX_g6p_B_e	('BjSA', 'NTC')	BjSA	NTC
4127	EX_4hbz_e	GSMM_159	EX_glu__L_e	GSMM_259	EX_g6p_B_e	('BjSA', 'NTC')	BjSA	NTC
4140	EX_4hbz_e	GSMM_014	EX_cgly_e	GSMM_259	EX_g6p_B_e	('BjSA', 'NTC')	BjSA	NTC
4141	EX_4hbz_e	GSMM_017	EX_cgly_e	GSMM_259	EX_g6p_B_e	('BjSA', 'NTC')	BjSA	NTC
4151	EX_4hbz_e	GSMM_159	EX_cgly_e	GSMM_259	EX_g6p_B_e	('BjSA', 'NTC')	BjSA	NTC
4152	EX_4hbz_e	GSMM_166	EX_cgly_e	GSMM_259	EX_g6p_B_e	('BjSA', 'NTC')	BjSA	NTC
4160	EX_4hbz_e	GSMM_314	EX_cgly_e	GSMM_259	EX_g6p_B_e	('BjSA', 'NTC')	BjSA	NTC
4166	EX_4hbz_e	GSMM_014	EX_glc__D_e	GSMM_259	EX_g6p_B_e	('BjSA', 'NTC')	BjSA	NTC
4176	EX_4hbz_e	GSMM_159	EX_glc__D_e	GSMM_259	EX_g6p_B_e	('BjSA', 'NTC')	BjSA	NTC
4177	EX_4hbz_e	GSMM_166	EX_glc__D_e	GSMM_259	EX_g6p_B_e	('BjSA', 'NTC')	BjSA	NTC
4178	EX_4hbz_e	GSMM_176	EX_glc__D_e	GSMM_259	EX_g6p_B_e	('BjSA', 'NTC')	BjSA	NTC
4180	EX_4hbz_e	GSMM_208	EX_glc__D_e	GSMM_259	EX_g6p_B_e	('BjSA', 'NTC')	BjSA	NTC
4183	EX_4hbz_e	GSMM_244	EX_glc__D_e	GSMM_259	EX_g6p_B_e	('BjSA', 'NTC')	BjSA	NTC
4188	EX_4hbz_e	GSMM_314	EX_glc__D_e	GSMM_259	EX_g6p_B_e	('BjSA', 'NTC')	BjSA	NTC
4193	EX_4hbz_e	GSMM_354	EX_glc__D_e	GSMM_259	EX_g6p_B_e	('BjSA', 'NTC')	BjSA	NTC
4198	EX_4hbz_e	GSMM_014	EX_pydxn_e	GSMM_259	EX_g6p_B_e	('BjSA', 'NTC')	BjSA	NTC
4200	EX_4hbz_e	GSMM_048	EX_pydxn_e	GSMM_259	EX_g6p_B_e	('BjSA', 'NTC')	BjSA	NTC
4204	EX_4hbz_e	GSMM_354	EX_pydxn_e	GSMM_259	EX_g6p_B_e	('BjSA', 'NTC')	BjSA	NTC
4205	EX_4hbz_e	GSMM_014	EX_cys__L_e	GSMM_259	EX_g6p_B_e	('BjSA', 'NTC')	BjSA	NTC
4212	EX_4hbz_e	GSMM_105	EX_cys__L_e	GSMM_259	EX_g6p_B_e	('BjSA', 'NTC')	BjSA	NTC
4213	EX_4hbz_e	GSMM_155	EX_cys__L_e	GSMM_259	EX_g6p_B_e	('BjSA', 'NTC')	BjSA	NTC
4215	EX_4hbz_e	GSMM_170	EX_cys__L_e	GSMM_259	EX_g6p_B_e	('BjSA', 'NTC')	BjSA	NTC
4216	EX_4hbz_e	GSMM_176	EX_cys__L_e	GSMM_259	EX_g6p_B_e	('BjSA', 'NTC')	BjSA	NTC
4222	EX_4hbz_e	GSMM_314	EX_cys__L_e	GSMM_259	EX_g6p_B_e	('BjSA', 'NTC')	BjSA	NTC
4227	EX_4hbz_e	GSMM_354	EX_cys__L_e	GSMM_259	EX_g6p_B_e	('BjSA', 'NTC')	BjSA	NTC
4230	EX_4hbz_e	GSMM_014	EX_pheme_e	GSMM_259	EX_g6p_B_e	('BjSA', 'NTC')	BjSA	NTC
4232	EX_4hbz_e	GSMM_017	EX_pheme_e	GSMM_259	EX_g6p_B_e	('BjSA', 'NTC')	BjSA	NTC
4239	EX_4hbz_e	GSMM_091	EX_pheme_e	GSMM_259	EX_g6p_B_e	('BjSA', 'NTC')	BjSA	NTC
4241	EX_4hbz_e	GSMM_105	EX_pheme_e	GSMM_259	EX_g6p_B_e	('BjSA', 'NTC')	BjSA	NTC
4245	EX_4hbz_e	GSMM_166	EX_pheme_e	GSMM_259	EX_g6p_B_e	('BjSA', 'NTC')	BjSA	NTC
4246	EX_4hbz_e	GSMM_176	EX_pheme_e	GSMM_259	EX_g6p_B_e	('BjSA', 'NTC')	BjSA	NTC
4248	EX_4hbz_e	GSMM_208	EX_pheme_e	GSMM_259	EX_g6p_B_e	('BjSA', 'NTC')	BjSA	NTC
4260	EX_4hbz_e	GSMM_017	EX_thym_e	GSMM_259	EX_g6p_B_e	('BjSA', 'NTC')	BjSA	NTC
4265	EX_4hbz_e	GSMM_048	EX_thym_e	GSMM_259	EX_g6p_B_e	('BjSA', 'NTC')	BjSA	NTC
4272	EX_4hbz_e	GSMM_155	EX_thym_e	GSMM_259	EX_g6p_B_e	('BjSA', 'NTC')	BjSA	NTC
4273	EX_4hbz_e	GSMM_159	EX_thym_e	GSMM_259	EX_g6p_B_e	('BjSA', 'NTC')	BjSA	NTC
4276	EX_4hbz_e	GSMM_170	EX_thym_e	GSMM_259	EX_g6p_B_e	('BjSA', 'NTC')	BjSA	NTC
4289	EX_4hbz_e	GSMM_017	EX_g3pe_e	GSMM_259	EX_g6p_B_e	('BjSA', 'NTC')	BjSA	NTC
4298	EX_4hbz_e	GSMM_176	EX_g3pe_e	GSMM_259	EX_g6p_B_e	('BjSA', 'NTC')	BjSA	NTC
4299	EX_4hbz_e	GSMM_208	EX_g3pe_e	GSMM_259	EX_g6p_B_e	('BjSA', 'NTC')	BjSA	NTC
4302	EX_4hbz_e	GSMM_314	EX_g3pe_e	GSMM_259	EX_g6p_B_e	('BjSA', 'NTC')	BjSA	NTC
4307	EX_4hbz_e	GSMM_048	EX_enter_e	GSMM_259	EX_g6p_B_e	('BjSA', 'NTC')	BjSA	NTC
4308	EX_4hbz_e	GSMM_091	EX_enter_e	GSMM_259	EX_g6p_B_e	('BjSA', 'NTC')	BjSA	NTC
4311	EX_4hbz_e	GSMM_155	EX_enter_e	GSMM_259	EX_g6p_B_e	('BjSA', 'NTC')	BjSA	NTC
4320	EX_4hbz_e	GSMM_017	EX_ppap_e	GSMM_259	EX_g6p_B_e	('BjSA', 'NTC')	BjSA	NTC
4324	EX_4hbz_e	GSMM_048	EX_ppap_e	GSMM_259	EX_g6p_B_e	('BjSA', 'NTC')	BjSA	NTC
4330	EX_4hbz_e	GSMM_105	EX_ppap_e	GSMM_259	EX_g6p_B_e	('BjSA', 'NTC')	BjSA	NTC
4332	EX_4hbz_e	GSMM_155	EX_ppap_e	GSMM_259	EX_g6p_B_e	('BjSA', 'NTC')	BjSA	NTC
4333	EX_4hbz_e	GSMM_159	EX_ppap_e	GSMM_259	EX_g6p_B_e	('BjSA', 'NTC')	BjSA	NTC
4334	EX_4hbz_e	GSMM_176	EX_ppap_e	GSMM_259	EX_g6p_B_e	('BjSA', 'NTC')	BjSA	NTC
4337	EX_4hbz_e	GSMM_244	EX_ppap_e	GSMM_259	EX_g6p_B_e	('BjSA', 'NTC')	BjSA	NTC
4347	EX_4hbz_e	GSMM_017	EX_4hba_e	GSMM_259	EX_g6p_B_e	('BjSA', 'NTC')	BjSA	NTC
4350	EX_4hbz_e	GSMM_048	EX_4hba_e	GSMM_259	EX_g6p_B_e	('BjSA', 'NTC')	BjSA	NTC
4355	EX_4hbz_e	GSMM_091	EX_4hba_e	GSMM_259	EX_g6p_B_e	('BjSA', 'NTC')	BjSA	NTC
4357	EX_4hbz_e	GSMM_105	EX_4hba_e	GSMM_259	EX_g6p_B_e	('BjSA', 'NTC')	BjSA	NTC
4362	EX_4hbz_e	GSMM_208	EX_4hba_e	GSMM_259	EX_g6p_B_e	('BjSA', 'NTC')	BjSA	NTC
4363	EX_4hbz_e	GSMM_244	EX_4hba_e	GSMM_259	EX_g6p_B_e	('BjSA', 'NTC')	BjSA	NTC
4372	EX_4hbz_e	GSMM_354	EX_4hba_e	GSMM_259	EX_g6p_B_e	('BjSA', 'NTC')	BjSA	NTC
4379	EX_4hbz_e	GSMM_017	EX_4abut_e	GSMM_259	EX_g6p_B_e	('BjSA', 'NTC')	BjSA	NTC
4382	EX_4hbz_e	GSMM_105	EX_4abut_e	GSMM_259	EX_g6p_B_e	('BjSA', 'NTC')	BjSA	NTC
4385	EX_4hbz_e	GSMM_208	EX_4abut_e	GSMM_259	EX_g6p_B_e	('BjSA', 'NTC')	BjSA	NTC
4387	EX_4hbz_e	GSMM_244	EX_4abut_e	GSMM_259	EX_g6p_B_e	('BjSA', 'NTC')	BjSA	NTC
4394	EX_4hbz_e	GSMM_017	EX_lys__L_e	GSMM_259	EX_g6p_B_e	('BjSA', 'NTC')	BjSA	NTC
4399	EX_4hbz_e	GSMM_091	EX_lys__L_e	GSMM_259	EX_g6p_B_e	('BjSA', 'NTC')	BjSA	NTC
4404	EX_4hbz_e	GSMM_159	EX_lys__L_e	GSMM_259	EX_g6p_B_e	('BjSA', 'NTC')	BjSA	NTC
4409	EX_4hbz_e	GSMM_017	EX_indole_e	GSMM_259	EX_g6p_B_e	('BjSA', 'NTC')	BjSA	NTC
4414	EX_4hbz_e	GSMM_091	EX_indole_e	GSMM_259	EX_g6p_B_e	('BjSA', 'NTC')	BjSA	NTC
4420	EX_4hbz_e	GSMM_155	EX_indole_e	GSMM_259	EX_g6p_B_e	('BjSA', 'NTC')	BjSA	NTC
4421	EX_4hbz_e	GSMM_159	EX_indole_e	GSMM_259	EX_g6p_B_e	('BjSA', 'NTC')	BjSA	NTC
4423	EX_4hbz_e	GSMM_166	EX_indole_e	GSMM_259	EX_g6p_B_e	('BjSA', 'NTC')	BjSA	NTC
4424	EX_4hbz_e	GSMM_208	EX_indole_e	GSMM_259	EX_g6p_B_e	('BjSA', 'NTC')	BjSA	NTC
4433	EX_4hbz_e	GSMM_017	EX_thr__L_e	GSMM_259	EX_g6p_B_e	('BjSA', 'NTC')	BjSA	NTC
4440	EX_4hbz_e	GSMM_208	EX_g3pg_e	GSMM_259	EX_g6p_B_e	('BjSA', 'NTC')	BjSA	NTC
4450	EX_4hbz_e	GSMM_048	EX_uri_e	GSMM_259	EX_g6p_B_e	('BjSA', 'NTC')	BjSA	NTC
4458	EX_4hbz_e	GSMM_244	EX_leu__L_e	GSMM_259	EX_g6p_B_e	('BjSA', 'NTC')	BjSA	NTC
4466	EX_4hbz_e	GSMM_314	EX_cytd_e	GSMM_259	EX_g6p_B_e	('BjSA', 'NTC')	BjSA	NTC
4474	EX_4hbz_e	GSMM_314	EX_adn_e	GSMM_259	EX_g6p_B_e	('BjSA', 'NTC')	BjSA	NTC
4481	EX_4hbz_e	GSMM_314	EX_gsn_e	GSMM_259	EX_g6p_B_e	('BjSA', 'NTC')	BjSA	NTC
4496	EX_4hbz_e	GSMM_105	EX_2dhglcn_e	GSMM_259	EX_g6p_B_e	('BjSA', 'NTC')	BjSA	NTC
4498	EX_4hbz_e	GSMM_314	EX_2dhglcn_e	GSMM_259	EX_g6p_B_e	('BjSA', 'NTC')	BjSA	NTC
4501	EX_4hbz_e	GSMM_091	EX_thm_e	GSMM_259	EX_g6p_B_e	('BjSA', 'NTC')	BjSA	NTC
4503	EX_4hbz_e	GSMM_170	EX_thm_e	GSMM_259	EX_g6p_B_e	('BjSA', 'NTC')	BjSA	NTC
4515	EX_4hbz_e	GSMM_176	EX_lcts_e	GSMM_259	EX_g6p_B_e	('BjSA', 'NTC')	BjSA	NTC
4524	EX_4hbz_e	GSMM_011	EX_acald_e	GSMM_239	EX_ppal_e	('BjSA', 'NTC')	BjSA	NTC
4527	EX_4hbz_e	GSMM_017	EX_acald_e	GSMM_239	EX_ppal_e	('BjSA', 'NTC')	BjSA	NTC
4533	EX_4hbz_e	GSMM_048	EX_acald_e	GSMM_239	EX_ppal_e	('BjSA', 'NTC')	BjSA	NTC
4541	EX_4hbz_e	GSMM_091	EX_acald_e	GSMM_239	EX_ppal_e	('BjSA', 'NTC')	BjSA	NTC
4545	EX_4hbz_e	GSMM_105	EX_acald_e	GSMM_239	EX_ppal_e	('BjSA', 'NTC')	BjSA	NTC
4551	EX_4hbz_e	GSMM_155	EX_acald_e	GSMM_239	EX_ppal_e	('BjSA', 'NTC')	BjSA	NTC
4553	EX_4hbz_e	GSMM_159	EX_acald_e	GSMM_239	EX_ppal_e	('BjSA', 'NTC')	BjSA	NTC
4556	EX_4hbz_e	GSMM_166	EX_acald_e	GSMM_239	EX_ppal_e	('BjSA', 'NTC')	BjSA	NTC
4557	EX_4hbz_e	GSMM_170	EX_acald_e	GSMM_239	EX_ppal_e	('BjSA', 'NTC')	BjSA	NTC
4560	EX_4hbz_e	GSMM_208	EX_acald_e	GSMM_239	EX_ppal_e	('BjSA', 'NTC')	BjSA	NTC
4565	EX_4hbz_e	GSMM_244	EX_acald_e	GSMM_239	EX_ppal_e	('BjSA', 'NTC')	BjSA	NTC
4573	EX_4hbz_e	GSMM_314	EX_acald_e	GSMM_239	EX_ppal_e	('BjSA', 'NTC')	BjSA	NTC
4585	EX_4hbz_e	GSMM_014	EX_5drib_e	GSMM_239	EX_ppal_e	('BjSA', 'NTC')	BjSA	NTC
4587	EX_4hbz_e	GSMM_017	EX_5drib_e	GSMM_239	EX_ppal_e	('BjSA', 'NTC')	BjSA	NTC
4591	EX_4hbz_e	GSMM_048	EX_5drib_e	GSMM_239	EX_ppal_e	('BjSA', 'NTC')	BjSA	NTC
4599	EX_4hbz_e	GSMM_091	EX_5drib_e	GSMM_239	EX_ppal_e	('BjSA', 'NTC')	BjSA	NTC
4603	EX_4hbz_e	GSMM_105	EX_5drib_e	GSMM_239	EX_ppal_e	('BjSA', 'NTC')	BjSA	NTC
4609	EX_4hbz_e	GSMM_155	EX_5drib_e	GSMM_239	EX_ppal_e	('BjSA', 'NTC')	BjSA	NTC
4610	EX_4hbz_e	GSMM_159	EX_5drib_e	GSMM_239	EX_ppal_e	('BjSA', 'NTC')	BjSA	NTC
4612	EX_4hbz_e	GSMM_166	EX_5drib_e	GSMM_239	EX_ppal_e	('BjSA', 'NTC')	BjSA	NTC
4613	EX_4hbz_e	GSMM_176	EX_5drib_e	GSMM_239	EX_ppal_e	('BjSA', 'NTC')	BjSA	NTC
4616	EX_4hbz_e	GSMM_208	EX_5drib_e	GSMM_239	EX_ppal_e	('BjSA', 'NTC')	BjSA	NTC
4621	EX_4hbz_e	GSMM_244	EX_5drib_e	GSMM_239	EX_ppal_e	('BjSA', 'NTC')	BjSA	NTC
4629	EX_4hbz_e	GSMM_314	EX_5drib_e	GSMM_239	EX_ppal_e	('BjSA', 'NTC')	BjSA	NTC
4635	EX_4hbz_e	GSMM_354	EX_5drib_e	GSMM_239	EX_ppal_e	('BjSA', 'NTC')	BjSA	NTC
4644	EX_4hbz_e	GSMM_011	EX_etoh_e	GSMM_239	EX_ppal_e	('BjSA', 'NTC')	BjSA	NTC
4645	EX_4hbz_e	GSMM_014	EX_etoh_e	GSMM_239	EX_ppal_e	('BjSA', 'NTC')	BjSA	NTC
4648	EX_4hbz_e	GSMM_017	EX_etoh_e	GSMM_239	EX_ppal_e	('BjSA', 'NTC')	BjSA	NTC
4654	EX_4hbz_e	GSMM_048	EX_etoh_e	GSMM_239	EX_ppal_e	('BjSA', 'NTC')	BjSA	NTC
4664	EX_4hbz_e	GSMM_105	EX_etoh_e	GSMM_239	EX_ppal_e	('BjSA', 'NTC')	BjSA	NTC
4671	EX_4hbz_e	GSMM_159	EX_etoh_e	GSMM_239	EX_ppal_e	('BjSA', 'NTC')	BjSA	NTC
4673	EX_4hbz_e	GSMM_166	EX_etoh_e	GSMM_239	EX_ppal_e	('BjSA', 'NTC')	BjSA	NTC
4674	EX_4hbz_e	GSMM_176	EX_etoh_e	GSMM_239	EX_ppal_e	('BjSA', 'NTC')	BjSA	NTC
4677	EX_4hbz_e	GSMM_208	EX_etoh_e	GSMM_239	EX_ppal_e	('BjSA', 'NTC')	BjSA	NTC
4682	EX_4hbz_e	GSMM_244	EX_etoh_e	GSMM_239	EX_ppal_e	('BjSA', 'NTC')	BjSA	NTC
4695	EX_4hbz_e	GSMM_354	EX_etoh_e	GSMM_239	EX_ppal_e	('BjSA', 'NTC')	BjSA	NTC
4704	EX_4hbz_e	GSMM_011	EX_glyc3p_e	GSMM_239	EX_ppal_e	('BjSA', 'NTC')	BjSA	NTC
4705	EX_4hbz_e	GSMM_014	EX_glyc3p_e	GSMM_239	EX_ppal_e	('BjSA', 'NTC')	BjSA	NTC
4707	EX_4hbz_e	GSMM_017	EX_glyc3p_e	GSMM_239	EX_ppal_e	('BjSA', 'NTC')	BjSA	NTC
4712	EX_4hbz_e	GSMM_105	EX_glyc3p_e	GSMM_239	EX_ppal_e	('BjSA', 'NTC')	BjSA	NTC
4716	EX_4hbz_e	GSMM_155	EX_glyc3p_e	GSMM_239	EX_ppal_e	('BjSA', 'NTC')	BjSA	NTC
4718	EX_4hbz_e	GSMM_176	EX_glyc3p_e	GSMM_239	EX_ppal_e	('BjSA', 'NTC')	BjSA	NTC
4720	EX_4hbz_e	GSMM_208	EX_glyc3p_e	GSMM_239	EX_ppal_e	('BjSA', 'NTC')	BjSA	NTC
4733	EX_4hbz_e	GSMM_354	EX_glyc3p_e	GSMM_239	EX_ppal_e	('BjSA', 'NTC')	BjSA	NTC
4737	EX_4hbz_e	GSMM_014	EX_5mdru1p_e	GSMM_239	EX_ppal_e	('BjSA', 'NTC')	BjSA	NTC
4740	EX_4hbz_e	GSMM_048	EX_5mdru1p_e	GSMM_239	EX_ppal_e	('BjSA', 'NTC')	BjSA	NTC
4744	EX_4hbz_e	GSMM_091	EX_5mdru1p_e	GSMM_239	EX_ppal_e	('BjSA', 'NTC')	BjSA	NTC
4747	EX_4hbz_e	GSMM_105	EX_5mdru1p_e	GSMM_239	EX_ppal_e	('BjSA', 'NTC')	BjSA	NTC
4751	EX_4hbz_e	GSMM_159	EX_5mdru1p_e	GSMM_239	EX_ppal_e	('BjSA', 'NTC')	BjSA	NTC
4752	EX_4hbz_e	GSMM_166	EX_5mdru1p_e	GSMM_239	EX_ppal_e	('BjSA', 'NTC')	BjSA	NTC
4755	EX_4hbz_e	GSMM_208	EX_5mdru1p_e	GSMM_239	EX_ppal_e	('BjSA', 'NTC')	BjSA	NTC
4762	EX_4hbz_e	GSMM_354	EX_5mdru1p_e	GSMM_239	EX_ppal_e	('BjSA', 'NTC')	BjSA	NTC
4768	EX_4hbz_e	GSMM_011	EX_ptrc_e	GSMM_239	EX_ppal_e	('BjSA', 'NTC')	BjSA	NTC
4774	EX_4hbz_e	GSMM_048	EX_ptrc_e	GSMM_239	EX_ppal_e	('BjSA', 'NTC')	BjSA	NTC
4782	EX_4hbz_e	GSMM_105	EX_ptrc_e	GSMM_239	EX_ppal_e	('BjSA', 'NTC')	BjSA	NTC
4786	EX_4hbz_e	GSMM_155	EX_ptrc_e	GSMM_239	EX_ppal_e	('BjSA', 'NTC')	BjSA	NTC
4788	EX_4hbz_e	GSMM_159	EX_ptrc_e	GSMM_239	EX_ppal_e	('BjSA', 'NTC')	BjSA	NTC
4790	EX_4hbz_e	GSMM_166	EX_ptrc_e	GSMM_239	EX_ppal_e	('BjSA', 'NTC')	BjSA	NTC
4791	EX_4hbz_e	GSMM_176	EX_ptrc_e	GSMM_239	EX_ppal_e	('BjSA', 'NTC')	BjSA	NTC
4794	EX_4hbz_e	GSMM_208	EX_ptrc_e	GSMM_239	EX_ppal_e	('BjSA', 'NTC')	BjSA	NTC
4798	EX_4hbz_e	GSMM_244	EX_ptrc_e	GSMM_239	EX_ppal_e	('BjSA', 'NTC')	BjSA	NTC
4804	EX_4hbz_e	GSMM_314	EX_ptrc_e	GSMM_239	EX_ppal_e	('BjSA', 'NTC')	BjSA	NTC
4810	EX_4hbz_e	GSMM_354	EX_ptrc_e	GSMM_239	EX_ppal_e	('BjSA', 'NTC')	BjSA	NTC
4817	EX_4hbz_e	GSMM_011	EX_rib__D_e	GSMM_239	EX_ppal_e	('BjSA', 'NTC')	BjSA	NTC
4818	EX_4hbz_e	GSMM_014	EX_rib__D_e	GSMM_239	EX_ppal_e	('BjSA', 'NTC')	BjSA	NTC
4824	EX_4hbz_e	GSMM_048	EX_rib__D_e	GSMM_239	EX_ppal_e	('BjSA', 'NTC')	BjSA	NTC
4829	EX_4hbz_e	GSMM_091	EX_rib__D_e	GSMM_239	EX_ppal_e	('BjSA', 'NTC')	BjSA	NTC
4838	EX_4hbz_e	GSMM_170	EX_rib__D_e	GSMM_239	EX_ppal_e	('BjSA', 'NTC')	BjSA	NTC
4839	EX_4hbz_e	GSMM_176	EX_rib__D_e	GSMM_239	EX_ppal_e	('BjSA', 'NTC')	BjSA	NTC
4842	EX_4hbz_e	GSMM_208	EX_rib__D_e	GSMM_239	EX_ppal_e	('BjSA', 'NTC')	BjSA	NTC
4853	EX_4hbz_e	GSMM_314	EX_rib__D_e	GSMM_239	EX_ppal_e	('BjSA', 'NTC')	BjSA	NTC
4860	EX_4hbz_e	GSMM_354	EX_rib__D_e	GSMM_239	EX_ppal_e	('BjSA', 'NTC')	BjSA	NTC
4868	EX_4hbz_e	GSMM_014	EX_actn__R_e	GSMM_239	EX_ppal_e	('BjSA', 'NTC')	BjSA	NTC
4876	EX_4hbz_e	GSMM_091	EX_actn__R_e	GSMM_239	EX_ppal_e	('BjSA', 'NTC')	BjSA	NTC
4878	EX_4hbz_e	GSMM_105	EX_actn__R_e	GSMM_239	EX_ppal_e	('BjSA', 'NTC')	BjSA	NTC
4880	EX_4hbz_e	GSMM_155	EX_actn__R_e	GSMM_239	EX_ppal_e	('BjSA', 'NTC')	BjSA	NTC
4881	EX_4hbz_e	GSMM_166	EX_actn__R_e	GSMM_239	EX_ppal_e	('BjSA', 'NTC')	BjSA	NTC
4882	EX_4hbz_e	GSMM_176	EX_actn__R_e	GSMM_239	EX_ppal_e	('BjSA', 'NTC')	BjSA	NTC
4890	EX_4hbz_e	GSMM_354	EX_actn__R_e	GSMM_239	EX_ppal_e	('BjSA', 'NTC')	BjSA	NTC
4896	EX_4hbz_e	GSMM_014	EX_spmd_e	GSMM_239	EX_ppal_e	('BjSA', 'NTC')	BjSA	NTC
4899	EX_4hbz_e	GSMM_017	EX_spmd_e	GSMM_239	EX_ppal_e	('BjSA', 'NTC')	BjSA	NTC
4903	EX_4hbz_e	GSMM_048	EX_spmd_e	GSMM_239	EX_ppal_e	('BjSA', 'NTC')	BjSA	NTC
4910	EX_4hbz_e	GSMM_091	EX_spmd_e	GSMM_239	EX_ppal_e	('BjSA', 'NTC')	BjSA	NTC
4913	EX_4hbz_e	GSMM_105	EX_spmd_e	GSMM_239	EX_ppal_e	('BjSA', 'NTC')	BjSA	NTC
4919	EX_4hbz_e	GSMM_159	EX_spmd_e	GSMM_239	EX_ppal_e	('BjSA', 'NTC')	BjSA	NTC
4922	EX_4hbz_e	GSMM_166	EX_spmd_e	GSMM_239	EX_ppal_e	('BjSA', 'NTC')	BjSA	NTC
4923	EX_4hbz_e	GSMM_170	EX_spmd_e	GSMM_239	EX_ppal_e	('BjSA', 'NTC')	BjSA	NTC
4925	EX_4hbz_e	GSMM_208	EX_spmd_e	GSMM_239	EX_ppal_e	('BjSA', 'NTC')	BjSA	NTC
4934	EX_4hbz_e	GSMM_314	EX_spmd_e	GSMM_239	EX_ppal_e	('BjSA', 'NTC')	BjSA	NTC
4938	EX_4hbz_e	GSMM_354	EX_spmd_e	GSMM_239	EX_ppal_e	('BjSA', 'NTC')	BjSA	NTC
4951	EX_4hbz_e	GSMM_314	EX_succ_e	GSMM_239	EX_ppal_e	('BjSA', 'NTC')	BjSA	NTC
4955	EX_4hbz_e	GSMM_011	EX_glyc_e	GSMM_239	EX_ppal_e	('BjSA', 'NTC')	BjSA	NTC
4956	EX_4hbz_e	GSMM_014	EX_glyc_e	GSMM_239	EX_ppal_e	('BjSA', 'NTC')	BjSA	NTC
4959	EX_4hbz_e	GSMM_017	EX_glyc_e	GSMM_239	EX_ppal_e	('BjSA', 'NTC')	BjSA	NTC
4965	EX_4hbz_e	GSMM_048	EX_glyc_e	GSMM_239	EX_ppal_e	('BjSA', 'NTC')	BjSA	NTC
4972	EX_4hbz_e	GSMM_091	EX_glyc_e	GSMM_239	EX_ppal_e	('BjSA', 'NTC')	BjSA	NTC
4976	EX_4hbz_e	GSMM_105	EX_glyc_e	GSMM_239	EX_ppal_e	('BjSA', 'NTC')	BjSA	NTC
4981	EX_4hbz_e	GSMM_155	EX_glyc_e	GSMM_239	EX_ppal_e	('BjSA', 'NTC')	BjSA	NTC
4983	EX_4hbz_e	GSMM_159	EX_glyc_e	GSMM_239	EX_ppal_e	('BjSA', 'NTC')	BjSA	NTC
4986	EX_4hbz_e	GSMM_166	EX_glyc_e	GSMM_239	EX_ppal_e	('BjSA', 'NTC')	BjSA	NTC
4987	EX_4hbz_e	GSMM_176	EX_glyc_e	GSMM_239	EX_ppal_e	('BjSA', 'NTC')	BjSA	NTC
4990	EX_4hbz_e	GSMM_208	EX_glyc_e	GSMM_239	EX_ppal_e	('BjSA', 'NTC')	BjSA	NTC
4995	EX_4hbz_e	GSMM_244	EX_glyc_e	GSMM_239	EX_ppal_e	('BjSA', 'NTC')	BjSA	NTC
5003	EX_4hbz_e	GSMM_314	EX_glyc_e	GSMM_239	EX_ppal_e	('BjSA', 'NTC')	BjSA	NTC
5010	EX_4hbz_e	GSMM_354	EX_glyc_e	GSMM_239	EX_ppal_e	('BjSA', 'NTC')	BjSA	NTC
5019	EX_4hbz_e	GSMM_011	EX_fe3pyovd_kt_e	GSMM_239	EX_ppal_e	('BjSA', 'NTC')	BjSA	NTC
5020	EX_4hbz_e	GSMM_014	EX_fe3pyovd_kt_e	GSMM_239	EX_ppal_e	('BjSA', 'NTC')	BjSA	NTC
5023	EX_4hbz_e	GSMM_017	EX_fe3pyovd_kt_e	GSMM_239	EX_ppal_e	('BjSA', 'NTC')	BjSA	NTC
5029	EX_4hbz_e	GSMM_048	EX_fe3pyovd_kt_e	GSMM_239	EX_ppal_e	('BjSA', 'NTC')	BjSA	NTC
5037	EX_4hbz_e	GSMM_091	EX_fe3pyovd_kt_e	GSMM_239	EX_ppal_e	('BjSA', 'NTC')	BjSA	NTC
5041	EX_4hbz_e	GSMM_105	EX_fe3pyovd_kt_e	GSMM_239	EX_ppal_e	('BjSA', 'NTC')	BjSA	NTC
5047	EX_4hbz_e	GSMM_155	EX_fe3pyovd_kt_e	GSMM_239	EX_ppal_e	('BjSA', 'NTC')	BjSA	NTC
5049	EX_4hbz_e	GSMM_159	EX_fe3pyovd_kt_e	GSMM_239	EX_ppal_e	('BjSA', 'NTC')	BjSA	NTC
5052	EX_4hbz_e	GSMM_166	EX_fe3pyovd_kt_e	GSMM_239	EX_ppal_e	('BjSA', 'NTC')	BjSA	NTC
5053	EX_4hbz_e	GSMM_170	EX_fe3pyovd_kt_e	GSMM_239	EX_ppal_e	('BjSA', 'NTC')	BjSA	NTC
5054	EX_4hbz_e	GSMM_176	EX_fe3pyovd_kt_e	GSMM_239	EX_ppal_e	('BjSA', 'NTC')	BjSA	NTC
5057	EX_4hbz_e	GSMM_208	EX_fe3pyovd_kt_e	GSMM_239	EX_ppal_e	('BjSA', 'NTC')	BjSA	NTC
5062	EX_4hbz_e	GSMM_244	EX_fe3pyovd_kt_e	GSMM_239	EX_ppal_e	('BjSA', 'NTC')	BjSA	NTC
5071	EX_4hbz_e	GSMM_314	EX_fe3pyovd_kt_e	GSMM_239	EX_ppal_e	('BjSA', 'NTC')	BjSA	NTC
5078	EX_4hbz_e	GSMM_354	EX_fe3pyovd_kt_e	GSMM_239	EX_ppal_e	('BjSA', 'NTC')	BjSA	NTC
5087	EX_4hbz_e	GSMM_011	EX_pyovd_kt_e	GSMM_239	EX_ppal_e	('BjSA', 'NTC')	BjSA	NTC
5088	EX_4hbz_e	GSMM_014	EX_pyovd_kt_e	GSMM_239	EX_ppal_e	('BjSA', 'NTC')	BjSA	NTC
5091	EX_4hbz_e	GSMM_017	EX_pyovd_kt_e	GSMM_239	EX_ppal_e	('BjSA', 'NTC')	BjSA	NTC
5097	EX_4hbz_e	GSMM_048	EX_pyovd_kt_e	GSMM_239	EX_ppal_e	('BjSA', 'NTC')	BjSA	NTC
5105	EX_4hbz_e	GSMM_091	EX_pyovd_kt_e	GSMM_239	EX_ppal_e	('BjSA', 'NTC')	BjSA	NTC
5109	EX_4hbz_e	GSMM_105	EX_pyovd_kt_e	GSMM_239	EX_ppal_e	('BjSA', 'NTC')	BjSA	NTC
5115	EX_4hbz_e	GSMM_155	EX_pyovd_kt_e	GSMM_239	EX_ppal_e	('BjSA', 'NTC')	BjSA	NTC
5117	EX_4hbz_e	GSMM_159	EX_pyovd_kt_e	GSMM_239	EX_ppal_e	('BjSA', 'NTC')	BjSA	NTC
5120	EX_4hbz_e	GSMM_166	EX_pyovd_kt_e	GSMM_239	EX_ppal_e	('BjSA', 'NTC')	BjSA	NTC
5121	EX_4hbz_e	GSMM_170	EX_pyovd_kt_e	GSMM_239	EX_ppal_e	('BjSA', 'NTC')	BjSA	NTC
5122	EX_4hbz_e	GSMM_176	EX_pyovd_kt_e	GSMM_239	EX_ppal_e	('BjSA', 'NTC')	BjSA	NTC
5125	EX_4hbz_e	GSMM_208	EX_pyovd_kt_e	GSMM_239	EX_ppal_e	('BjSA', 'NTC')	BjSA	NTC
5130	EX_4hbz_e	GSMM_244	EX_pyovd_kt_e	GSMM_239	EX_ppal_e	('BjSA', 'NTC')	BjSA	NTC
5139	EX_4hbz_e	GSMM_314	EX_pyovd_kt_e	GSMM_239	EX_ppal_e	('BjSA', 'NTC')	BjSA	NTC
5146	EX_4hbz_e	GSMM_354	EX_pyovd_kt_e	GSMM_239	EX_ppal_e	('BjSA', 'NTC')	BjSA	NTC
5155	EX_4hbz_e	GSMM_017	EX_cellb_e	GSMM_239	EX_ppal_e	('BjSA', 'NTC')	BjSA	NTC
5158	EX_4hbz_e	GSMM_105	EX_cellb_e	GSMM_239	EX_ppal_e	('BjSA', 'NTC')	BjSA	NTC
5159	EX_4hbz_e	GSMM_155	EX_cellb_e	GSMM_239	EX_ppal_e	('BjSA', 'NTC')	BjSA	NTC
5160	EX_4hbz_e	GSMM_159	EX_cellb_e	GSMM_239	EX_ppal_e	('BjSA', 'NTC')	BjSA	NTC
5162	EX_4hbz_e	GSMM_011	EX_ser__L_e	GSMM_239	EX_ppal_e	('BjSA', 'NTC')	BjSA	NTC
5163	EX_4hbz_e	GSMM_014	EX_ser__L_e	GSMM_239	EX_ppal_e	('BjSA', 'NTC')	BjSA	NTC
5165	EX_4hbz_e	GSMM_017	EX_ser__L_e	GSMM_239	EX_ppal_e	('BjSA', 'NTC')	BjSA	NTC
5168	EX_4hbz_e	GSMM_048	EX_ser__L_e	GSMM_239	EX_ppal_e	('BjSA', 'NTC')	BjSA	NTC
5177	EX_4hbz_e	GSMM_155	EX_ser__L_e	GSMM_239	EX_ppal_e	('BjSA', 'NTC')	BjSA	NTC
5179	EX_4hbz_e	GSMM_166	EX_ser__L_e	GSMM_239	EX_ppal_e	('BjSA', 'NTC')	BjSA	NTC
5181	EX_4hbz_e	GSMM_208	EX_ser__L_e	GSMM_239	EX_ppal_e	('BjSA', 'NTC')	BjSA	NTC
5194	EX_4hbz_e	GSMM_354	EX_ser__L_e	GSMM_239	EX_ppal_e	('BjSA', 'NTC')	BjSA	NTC
5199	EX_4hbz_e	GSMM_011	EX_oxa_e	GSMM_239	EX_ppal_e	('BjSA', 'NTC')	BjSA	NTC
5203	EX_4hbz_e	GSMM_048	EX_oxa_e	GSMM_239	EX_ppal_e	('BjSA', 'NTC')	BjSA	NTC
5210	EX_4hbz_e	GSMM_105	EX_oxa_e	GSMM_239	EX_ppal_e	('BjSA', 'NTC')	BjSA	NTC
5216	EX_4hbz_e	GSMM_166	EX_oxa_e	GSMM_239	EX_ppal_e	('BjSA', 'NTC')	BjSA	NTC
5218	EX_4hbz_e	GSMM_208	EX_oxa_e	GSMM_239	EX_ppal_e	('BjSA', 'NTC')	BjSA	NTC
5227	EX_4hbz_e	GSMM_354	EX_oxa_e	GSMM_239	EX_ppal_e	('BjSA', 'NTC')	BjSA	NTC
5232	EX_4hbz_e	GSMM_011	EX_anhgm_e	GSMM_239	EX_ppal_e	('BjSA', 'NTC')	BjSA	NTC
5234	EX_4hbz_e	GSMM_017	EX_anhgm_e	GSMM_239	EX_ppal_e	('BjSA', 'NTC')	BjSA	NTC
5238	EX_4hbz_e	GSMM_048	EX_anhgm_e	GSMM_239	EX_ppal_e	('BjSA', 'NTC')	BjSA	NTC
5240	EX_4hbz_e	GSMM_091	EX_anhgm_e	GSMM_239	EX_ppal_e	('BjSA', 'NTC')	BjSA	NTC
5247	EX_4hbz_e	GSMM_170	EX_anhgm_e	GSMM_239	EX_ppal_e	('BjSA', 'NTC')	BjSA	NTC
5248	EX_4hbz_e	GSMM_176	EX_anhgm_e	GSMM_239	EX_ppal_e	('BjSA', 'NTC')	BjSA	NTC
5250	EX_4hbz_e	GSMM_208	EX_anhgm_e	GSMM_239	EX_ppal_e	('BjSA', 'NTC')	BjSA	NTC
5253	EX_4hbz_e	GSMM_244	EX_anhgm_e	GSMM_239	EX_ppal_e	('BjSA', 'NTC')	BjSA	NTC
5269	EX_4hbz_e	GSMM_011	EX_urea_e	GSMM_239	EX_ppal_e	('BjSA', 'NTC')	BjSA	NTC
5270	EX_4hbz_e	GSMM_014	EX_urea_e	GSMM_239	EX_ppal_e	('BjSA', 'NTC')	BjSA	NTC
5278	EX_4hbz_e	GSMM_048	EX_urea_e	GSMM_239	EX_ppal_e	('BjSA', 'NTC')	BjSA	NTC
5284	EX_4hbz_e	GSMM_091	EX_urea_e	GSMM_239	EX_ppal_e	('BjSA', 'NTC')	BjSA	NTC
5288	EX_4hbz_e	GSMM_105	EX_urea_e	GSMM_239	EX_ppal_e	('BjSA', 'NTC')	BjSA	NTC
5295	EX_4hbz_e	GSMM_166	EX_urea_e	GSMM_239	EX_ppal_e	('BjSA', 'NTC')	BjSA	NTC
5296	EX_4hbz_e	GSMM_176	EX_urea_e	GSMM_239	EX_ppal_e	('BjSA', 'NTC')	BjSA	NTC
5301	EX_4hbz_e	GSMM_244	EX_urea_e	GSMM_239	EX_ppal_e	('BjSA', 'NTC')	BjSA	NTC
5310	EX_4hbz_e	GSMM_314	EX_urea_e	GSMM_239	EX_ppal_e	('BjSA', 'NTC')	BjSA	NTC
5316	EX_4hbz_e	GSMM_354	EX_urea_e	GSMM_239	EX_ppal_e	('BjSA', 'NTC')	BjSA	NTC
5324	EX_4hbz_e	GSMM_011	EX_chol_e	GSMM_239	EX_ppal_e	('BjSA', 'NTC')	BjSA	NTC
5325	EX_4hbz_e	GSMM_014	EX_chol_e	GSMM_239	EX_ppal_e	('BjSA', 'NTC')	BjSA	NTC
5327	EX_4hbz_e	GSMM_017	EX_chol_e	GSMM_239	EX_ppal_e	('BjSA', 'NTC')	BjSA	NTC
5333	EX_4hbz_e	GSMM_105	EX_chol_e	GSMM_239	EX_ppal_e	('BjSA', 'NTC')	BjSA	NTC
5336	EX_4hbz_e	GSMM_155	EX_chol_e	GSMM_239	EX_ppal_e	('BjSA', 'NTC')	BjSA	NTC
5338	EX_4hbz_e	GSMM_166	EX_chol_e	GSMM_239	EX_ppal_e	('BjSA', 'NTC')	BjSA	NTC
5340	EX_4hbz_e	GSMM_208	EX_chol_e	GSMM_239	EX_ppal_e	('BjSA', 'NTC')	BjSA	NTC
5355	EX_4hbz_e	GSMM_354	EX_chol_e	GSMM_239	EX_ppal_e	('BjSA', 'NTC')	BjSA	NTC
5359	EX_4hbz_e	GSMM_011	EX_glyald_e	GSMM_239	EX_ppal_e	('BjSA', 'NTC')	BjSA	NTC
5364	EX_4hbz_e	GSMM_091	EX_glyald_e	GSMM_239	EX_ppal_e	('BjSA', 'NTC')	BjSA	NTC
5367	EX_4hbz_e	GSMM_105	EX_glyald_e	GSMM_239	EX_ppal_e	('BjSA', 'NTC')	BjSA	NTC
5370	EX_4hbz_e	GSMM_159	EX_glyald_e	GSMM_239	EX_ppal_e	('BjSA', 'NTC')	BjSA	NTC
5373	EX_4hbz_e	GSMM_166	EX_glyald_e	GSMM_239	EX_ppal_e	('BjSA', 'NTC')	BjSA	NTC
5374	EX_4hbz_e	GSMM_170	EX_glyald_e	GSMM_239	EX_ppal_e	('BjSA', 'NTC')	BjSA	NTC
5391	EX_4hbz_e	GSMM_011	EX_ura_e	GSMM_239	EX_ppal_e	('BjSA', 'NTC')	BjSA	NTC
5392	EX_4hbz_e	GSMM_017	EX_ura_e	GSMM_239	EX_ppal_e	('BjSA', 'NTC')	BjSA	NTC
5397	EX_4hbz_e	GSMM_048	EX_ura_e	GSMM_239	EX_ppal_e	('BjSA', 'NTC')	BjSA	NTC
5402	EX_4hbz_e	GSMM_155	EX_ura_e	GSMM_239	EX_ppal_e	('BjSA', 'NTC')	BjSA	NTC
5405	EX_4hbz_e	GSMM_170	EX_ura_e	GSMM_239	EX_ppal_e	('BjSA', 'NTC')	BjSA	NTC
5406	EX_4hbz_e	GSMM_176	EX_ura_e	GSMM_239	EX_ppal_e	('BjSA', 'NTC')	BjSA	NTC
5408	EX_4hbz_e	GSMM_244	EX_ura_e	GSMM_239	EX_ppal_e	('BjSA', 'NTC')	BjSA	NTC
5412	EX_4hbz_e	GSMM_314	EX_ura_e	GSMM_239	EX_ppal_e	('BjSA', 'NTC')	BjSA	NTC
5417	EX_4hbz_e	GSMM_011	EX_gal_e	GSMM_239	EX_ppal_e	('BjSA', 'NTC')	BjSA	NTC
5418	EX_4hbz_e	GSMM_017	EX_gal_e	GSMM_239	EX_ppal_e	('BjSA', 'NTC')	BjSA	NTC
5423	EX_4hbz_e	GSMM_048	EX_gal_e	GSMM_239	EX_ppal_e	('BjSA', 'NTC')	BjSA	NTC
5428	EX_4hbz_e	GSMM_091	EX_gal_e	GSMM_239	EX_ppal_e	('BjSA', 'NTC')	BjSA	NTC
5437	EX_4hbz_e	GSMM_170	EX_gal_e	GSMM_239	EX_ppal_e	('BjSA', 'NTC')	BjSA	NTC
5438	EX_4hbz_e	GSMM_208	EX_gal_e	GSMM_239	EX_ppal_e	('BjSA', 'NTC')	BjSA	NTC
5443	EX_4hbz_e	GSMM_244	EX_gal_e	GSMM_239	EX_ppal_e	('BjSA', 'NTC')	BjSA	NTC
5453	EX_4hbz_e	GSMM_354	EX_gal_e	GSMM_239	EX_ppal_e	('BjSA', 'NTC')	BjSA	NTC
5458	EX_4hbz_e	GSMM_011	EX_ala__D_e	GSMM_239	EX_ppal_e	('BjSA', 'NTC')	BjSA	NTC
5461	EX_4hbz_e	GSMM_048	EX_ala__D_e	GSMM_239	EX_ppal_e	('BjSA', 'NTC')	BjSA	NTC
5467	EX_4hbz_e	GSMM_105	EX_ala__D_e	GSMM_239	EX_ppal_e	('BjSA', 'NTC')	BjSA	NTC
5470	EX_4hbz_e	GSMM_155	EX_ala__D_e	GSMM_239	EX_ppal_e	('BjSA', 'NTC')	BjSA	NTC
5473	EX_4hbz_e	GSMM_176	EX_ala__D_e	GSMM_239	EX_ppal_e	('BjSA', 'NTC')	BjSA	NTC
5478	EX_4hbz_e	GSMM_244	EX_ala__D_e	GSMM_239	EX_ppal_e	('BjSA', 'NTC')	BjSA	NTC
5485	EX_4hbz_e	GSMM_314	EX_ala__D_e	GSMM_239	EX_ppal_e	('BjSA', 'NTC')	BjSA	NTC
5489	EX_4hbz_e	GSMM_354	EX_ala__D_e	GSMM_239	EX_ppal_e	('BjSA', 'NTC')	BjSA	NTC
5494	EX_4hbz_e	GSMM_011	EX_gua_e	GSMM_239	EX_ppal_e	('BjSA', 'NTC')	BjSA	NTC
5495	EX_4hbz_e	GSMM_017	EX_gua_e	GSMM_239	EX_ppal_e	('BjSA', 'NTC')	BjSA	NTC
5503	EX_4hbz_e	GSMM_170	EX_gua_e	GSMM_239	EX_ppal_e	('BjSA', 'NTC')	BjSA	NTC
5513	EX_4hbz_e	GSMM_011	EX_ind3ac_e	GSMM_239	EX_ppal_e	('BjSA', 'NTC')	BjSA	NTC
5514	EX_4hbz_e	GSMM_014	EX_ind3ac_e	GSMM_239	EX_ppal_e	('BjSA', 'NTC')	BjSA	NTC
5517	EX_4hbz_e	GSMM_017	EX_ind3ac_e	GSMM_239	EX_ppal_e	('BjSA', 'NTC')	BjSA	NTC
5522	EX_4hbz_e	GSMM_048	EX_ind3ac_e	GSMM_239	EX_ppal_e	('BjSA', 'NTC')	BjSA	NTC
5530	EX_4hbz_e	GSMM_091	EX_ind3ac_e	GSMM_239	EX_ppal_e	('BjSA', 'NTC')	BjSA	NTC
5533	EX_4hbz_e	GSMM_105	EX_ind3ac_e	GSMM_239	EX_ppal_e	('BjSA', 'NTC')	BjSA	NTC
5539	EX_4hbz_e	GSMM_166	EX_ind3ac_e	GSMM_239	EX_ppal_e	('BjSA', 'NTC')	BjSA	NTC
5540	EX_4hbz_e	GSMM_176	EX_ind3ac_e	GSMM_239	EX_ppal_e	('BjSA', 'NTC')	BjSA	NTC
5542	EX_4hbz_e	GSMM_208	EX_ind3ac_e	GSMM_239	EX_ppal_e	('BjSA', 'NTC')	BjSA	NTC
5546	EX_4hbz_e	GSMM_244	EX_ind3ac_e	GSMM_239	EX_ppal_e	('BjSA', 'NTC')	BjSA	NTC
5554	EX_4hbz_e	GSMM_314	EX_ind3ac_e	GSMM_239	EX_ppal_e	('BjSA', 'NTC')	BjSA	NTC
5561	EX_4hbz_e	GSMM_354	EX_ind3ac_e	GSMM_239	EX_ppal_e	('BjSA', 'NTC')	BjSA	NTC
5567	EX_4hbz_e	GSMM_011	EX_etha_e	GSMM_239	EX_ppal_e	('BjSA', 'NTC')	BjSA	NTC
5570	EX_4hbz_e	GSMM_048	EX_etha_e	GSMM_239	EX_ppal_e	('BjSA', 'NTC')	BjSA	NTC
5576	EX_4hbz_e	GSMM_105	EX_etha_e	GSMM_239	EX_ppal_e	('BjSA', 'NTC')	BjSA	NTC
5580	EX_4hbz_e	GSMM_155	EX_etha_e	GSMM_239	EX_ppal_e	('BjSA', 'NTC')	BjSA	NTC
5582	EX_4hbz_e	GSMM_166	EX_etha_e	GSMM_239	EX_ppal_e	('BjSA', 'NTC')	BjSA	NTC
5583	EX_4hbz_e	GSMM_170	EX_etha_e	GSMM_239	EX_ppal_e	('BjSA', 'NTC')	BjSA	NTC
5584	EX_4hbz_e	GSMM_176	EX_etha_e	GSMM_239	EX_ppal_e	('BjSA', 'NTC')	BjSA	NTC
5585	EX_4hbz_e	GSMM_244	EX_etha_e	GSMM_239	EX_ppal_e	('BjSA', 'NTC')	BjSA	NTC
5597	EX_4hbz_e	GSMM_011	EX_orn_e	GSMM_239	EX_ppal_e	('BjSA', 'NTC')	BjSA	NTC
5598	EX_4hbz_e	GSMM_014	EX_orn_e	GSMM_239	EX_ppal_e	('BjSA', 'NTC')	BjSA	NTC
5608	EX_4hbz_e	GSMM_105	EX_orn_e	GSMM_239	EX_ppal_e	('BjSA', 'NTC')	BjSA	NTC
5612	EX_4hbz_e	GSMM_155	EX_orn_e	GSMM_239	EX_ppal_e	('BjSA', 'NTC')	BjSA	NTC
5615	EX_4hbz_e	GSMM_166	EX_orn_e	GSMM_239	EX_ppal_e	('BjSA', 'NTC')	BjSA	NTC
5616	EX_4hbz_e	GSMM_176	EX_orn_e	GSMM_239	EX_ppal_e	('BjSA', 'NTC')	BjSA	NTC
5626	EX_4hbz_e	GSMM_354	EX_orn_e	GSMM_239	EX_ppal_e	('BjSA', 'NTC')	BjSA	NTC
5632	EX_4hbz_e	GSMM_014	EX_gthrd_e	GSMM_239	EX_ppal_e	('BjSA', 'NTC')	BjSA	NTC
5641	EX_4hbz_e	GSMM_159	EX_gthrd_e	GSMM_239	EX_ppal_e	('BjSA', 'NTC')	BjSA	NTC
5642	EX_4hbz_e	GSMM_166	EX_gthrd_e	GSMM_239	EX_ppal_e	('BjSA', 'NTC')	BjSA	NTC
5651	EX_4hbz_e	GSMM_014	EX_pea_e	GSMM_239	EX_ppal_e	('BjSA', 'NTC')	BjSA	NTC
5654	EX_4hbz_e	GSMM_048	EX_pea_e	GSMM_239	EX_ppal_e	('BjSA', 'NTC')	BjSA	NTC
5659	EX_4hbz_e	GSMM_170	EX_pea_e	GSMM_239	EX_ppal_e	('BjSA', 'NTC')	BjSA	NTC
5666	EX_4hbz_e	GSMM_014	EX_glu__L_e	GSMM_239	EX_ppal_e	('BjSA', 'NTC')	BjSA	NTC
5674	EX_4hbz_e	GSMM_159	EX_glu__L_e	GSMM_239	EX_ppal_e	('BjSA', 'NTC')	BjSA	NTC
5687	EX_4hbz_e	GSMM_014	EX_cgly_e	GSMM_239	EX_ppal_e	('BjSA', 'NTC')	BjSA	NTC
5688	EX_4hbz_e	GSMM_017	EX_cgly_e	GSMM_239	EX_ppal_e	('BjSA', 'NTC')	BjSA	NTC
5698	EX_4hbz_e	GSMM_159	EX_cgly_e	GSMM_239	EX_ppal_e	('BjSA', 'NTC')	BjSA	NTC
5699	EX_4hbz_e	GSMM_166	EX_cgly_e	GSMM_239	EX_ppal_e	('BjSA', 'NTC')	BjSA	NTC
5707	EX_4hbz_e	GSMM_314	EX_cgly_e	GSMM_239	EX_ppal_e	('BjSA', 'NTC')	BjSA	NTC
5713	EX_4hbz_e	GSMM_014	EX_glc__D_e	GSMM_239	EX_ppal_e	('BjSA', 'NTC')	BjSA	NTC
5723	EX_4hbz_e	GSMM_159	EX_glc__D_e	GSMM_239	EX_ppal_e	('BjSA', 'NTC')	BjSA	NTC
5724	EX_4hbz_e	GSMM_166	EX_glc__D_e	GSMM_239	EX_ppal_e	('BjSA', 'NTC')	BjSA	NTC
5725	EX_4hbz_e	GSMM_176	EX_glc__D_e	GSMM_239	EX_ppal_e	('BjSA', 'NTC')	BjSA	NTC
5727	EX_4hbz_e	GSMM_208	EX_glc__D_e	GSMM_239	EX_ppal_e	('BjSA', 'NTC')	BjSA	NTC
5730	EX_4hbz_e	GSMM_244	EX_glc__D_e	GSMM_239	EX_ppal_e	('BjSA', 'NTC')	BjSA	NTC
5735	EX_4hbz_e	GSMM_314	EX_glc__D_e	GSMM_239	EX_ppal_e	('BjSA', 'NTC')	BjSA	NTC
5740	EX_4hbz_e	GSMM_354	EX_glc__D_e	GSMM_239	EX_ppal_e	('BjSA', 'NTC')	BjSA	NTC
5745	EX_4hbz_e	GSMM_014	EX_cys__L_e	GSMM_239	EX_ppal_e	('BjSA', 'NTC')	BjSA	NTC
5752	EX_4hbz_e	GSMM_105	EX_cys__L_e	GSMM_239	EX_ppal_e	('BjSA', 'NTC')	BjSA	NTC
5753	EX_4hbz_e	GSMM_155	EX_cys__L_e	GSMM_239	EX_ppal_e	('BjSA', 'NTC')	BjSA	NTC
5755	EX_4hbz_e	GSMM_170	EX_cys__L_e	GSMM_239	EX_ppal_e	('BjSA', 'NTC')	BjSA	NTC
5756	EX_4hbz_e	GSMM_176	EX_cys__L_e	GSMM_239	EX_ppal_e	('BjSA', 'NTC')	BjSA	NTC
5762	EX_4hbz_e	GSMM_314	EX_cys__L_e	GSMM_239	EX_ppal_e	('BjSA', 'NTC')	BjSA	NTC
5767	EX_4hbz_e	GSMM_354	EX_cys__L_e	GSMM_239	EX_ppal_e	('BjSA', 'NTC')	BjSA	NTC
5770	EX_4hbz_e	GSMM_014	EX_pheme_e	GSMM_239	EX_ppal_e	('BjSA', 'NTC')	BjSA	NTC
5772	EX_4hbz_e	GSMM_017	EX_pheme_e	GSMM_239	EX_ppal_e	('BjSA', 'NTC')	BjSA	NTC
5779	EX_4hbz_e	GSMM_091	EX_pheme_e	GSMM_239	EX_ppal_e	('BjSA', 'NTC')	BjSA	NTC
5781	EX_4hbz_e	GSMM_105	EX_pheme_e	GSMM_239	EX_ppal_e	('BjSA', 'NTC')	BjSA	NTC
5785	EX_4hbz_e	GSMM_166	EX_pheme_e	GSMM_239	EX_ppal_e	('BjSA', 'NTC')	BjSA	NTC
5786	EX_4hbz_e	GSMM_176	EX_pheme_e	GSMM_239	EX_ppal_e	('BjSA', 'NTC')	BjSA	NTC
5788	EX_4hbz_e	GSMM_208	EX_pheme_e	GSMM_239	EX_ppal_e	('BjSA', 'NTC')	BjSA	NTC
5801	EX_4hbz_e	GSMM_017	EX_g3pe_e	GSMM_239	EX_ppal_e	('BjSA', 'NTC')	BjSA	NTC
5810	EX_4hbz_e	GSMM_176	EX_g3pe_e	GSMM_239	EX_ppal_e	('BjSA', 'NTC')	BjSA	NTC
5811	EX_4hbz_e	GSMM_208	EX_g3pe_e	GSMM_239	EX_ppal_e	('BjSA', 'NTC')	BjSA	NTC
5814	EX_4hbz_e	GSMM_314	EX_g3pe_e	GSMM_239	EX_ppal_e	('BjSA', 'NTC')	BjSA	NTC
5820	EX_4hbz_e	GSMM_048	EX_glcn_e	GSMM_239	EX_ppal_e	('BjSA', 'NTC')	BjSA	NTC
5828	EX_4hbz_e	GSMM_159	EX_glcn_e	GSMM_239	EX_ppal_e	('BjSA', 'NTC')	BjSA	NTC
5830	EX_4hbz_e	GSMM_208	EX_glcn_e	GSMM_239	EX_ppal_e	('BjSA', 'NTC')	BjSA	NTC
5835	EX_4hbz_e	GSMM_048	EX_acac_e	GSMM_239	EX_ppal_e	('BjSA', 'NTC')	BjSA	NTC
5839	EX_4hbz_e	GSMM_105	EX_acac_e	GSMM_239	EX_ppal_e	('BjSA', 'NTC')	BjSA	NTC
5841	EX_4hbz_e	GSMM_170	EX_acac_e	GSMM_239	EX_ppal_e	('BjSA', 'NTC')	BjSA	NTC
5842	EX_4hbz_e	GSMM_176	EX_acac_e	GSMM_239	EX_ppal_e	('BjSA', 'NTC')	BjSA	NTC
5848	EX_4hbz_e	GSMM_017	EX_4abut_e	GSMM_239	EX_ppal_e	('BjSA', 'NTC')	BjSA	NTC
5851	EX_4hbz_e	GSMM_105	EX_4abut_e	GSMM_239	EX_ppal_e	('BjSA', 'NTC')	BjSA	NTC
5854	EX_4hbz_e	GSMM_208	EX_4abut_e	GSMM_239	EX_ppal_e	('BjSA', 'NTC')	BjSA	NTC
5856	EX_4hbz_e	GSMM_244	EX_4abut_e	GSMM_239	EX_ppal_e	('BjSA', 'NTC')	BjSA	NTC
5861	EX_4hbz_e	GSMM_017	EX_lys__L_e	GSMM_239	EX_ppal_e	('BjSA', 'NTC')	BjSA	NTC
5866	EX_4hbz_e	GSMM_091	EX_lys__L_e	GSMM_239	EX_ppal_e	('BjSA', 'NTC')	BjSA	NTC
5871	EX_4hbz_e	GSMM_159	EX_lys__L_e	GSMM_239	EX_ppal_e	('BjSA', 'NTC')	BjSA	NTC
5876	EX_4hbz_e	GSMM_017	EX_agm_e	GSMM_239	EX_ppal_e	('BjSA', 'NTC')	BjSA	NTC
5878	EX_4hbz_e	GSMM_017	EX_4abz_e	GSMM_239	EX_ppal_e	('BjSA', 'NTC')	BjSA	NTC
5880	EX_4hbz_e	GSMM_017	EX_thr__L_e	GSMM_239	EX_ppal_e	('BjSA', 'NTC')	BjSA	NTC
5886	EX_4hbz_e	GSMM_017	EX_alaala_e	GSMM_239	EX_ppal_e	('BjSA', 'NTC')	BjSA	NTC
5890	EX_4hbz_e	GSMM_091	EX_alaala_e	GSMM_239	EX_ppal_e	('BjSA', 'NTC')	BjSA	NTC
5892	EX_4hbz_e	GSMM_155	EX_alaala_e	GSMM_239	EX_ppal_e	('BjSA', 'NTC')	BjSA	NTC
5894	EX_4hbz_e	GSMM_314	EX_alaala_e	GSMM_239	EX_ppal_e	('BjSA', 'NTC')	BjSA	NTC
5906	EX_4hbz_e	GSMM_354	EX_5dglcn_e	GSMM_239	EX_ppal_e	('BjSA', 'NTC')	BjSA	NTC
5910	EX_4hbz_e	GSMM_208	EX_g3pg_e	GSMM_239	EX_ppal_e	('BjSA', 'NTC')	BjSA	NTC
5932	EX_4hbz_e	GSMM_354	EX_udcpp_e	GSMM_239	EX_ppal_e	('BjSA', 'NTC')	BjSA	NTC
5938	EX_4hbz_e	GSMM_244	EX_leu__L_e	GSMM_239	EX_ppal_e	('BjSA', 'NTC')	BjSA	NTC
5944	EX_4hbz_e	GSMM_159	EX_cresol_e	GSMM_239	EX_ppal_e	('BjSA', 'NTC')	BjSA	NTC
5961	EX_4hbz_e	GSMM_091	EX_thm_e	GSMM_239	EX_ppal_e	('BjSA', 'NTC')	BjSA	NTC
5963	EX_4hbz_e	GSMM_170	EX_thm_e	GSMM_239	EX_ppal_e	('BjSA', 'NTC')	BjSA	NTC
5966	EX_4hbz_e	GSMM_091	EX_hxan_e	GSMM_239	EX_ppal_e	('BjSA', 'NTC')	BjSA	NTC
5969	EX_4hbz_e	GSMM_170	EX_hxan_e	GSMM_239	EX_ppal_e	('BjSA', 'NTC')	BjSA	NTC
5970	EX_4hbz_e	GSMM_176	EX_hxan_e	GSMM_239	EX_ppal_e	('BjSA', 'NTC')	BjSA	NTC
5982	EX_4hbz_e	GSMM_176	EX_lcts_e	GSMM_239	EX_ppal_e	('BjSA', 'NTC')	BjSA	NTC
5989	EX_ala_B_e	GSMM_014	EX_5drib_e	GSMM_024	EX_g3pg_e	('BjSA', 'NTC')	BjSA	NTC
5997	EX_ala_B_e	GSMM_354	EX_5drib_e	GSMM_024	EX_g3pg_e	('BjSA', 'NTC')	BjSA	NTC
5999	EX_ala_B_e	GSMM_014	EX_gthrd_e	GSMM_024	EX_g3pg_e	('BjSA', 'NTC')	BjSA	NTC
6004	EX_ala_B_e	GSMM_014	EX_etoh_e	GSMM_024	EX_g3pg_e	('BjSA', 'NTC')	BjSA	NTC
6010	EX_ala_B_e	GSMM_354	EX_etoh_e	GSMM_024	EX_g3pg_e	('BjSA', 'NTC')	BjSA	NTC
6012	EX_ala_B_e	GSMM_014	EX_ch4s_e	GSMM_024	EX_g3pg_e	('BjSA', 'NTC')	BjSA	NTC
6017	EX_ala_B_e	GSMM_354	EX_ch4s_e	GSMM_024	EX_g3pg_e	('BjSA', 'NTC')	BjSA	NTC
6019	EX_ala_B_e	GSMM_014	EX_fald_e	GSMM_024	EX_g3pg_e	('BjSA', 'NTC')	BjSA	NTC
6026	EX_ala_B_e	GSMM_354	EX_fald_e	GSMM_024	EX_g3pg_e	('BjSA', 'NTC')	BjSA	NTC
6028	EX_ala_B_e	GSMM_014	EX_rib__D_e	GSMM_024	EX_g3pg_e	('BjSA', 'NTC')	BjSA	NTC
6034	EX_ala_B_e	GSMM_354	EX_rib__D_e	GSMM_024	EX_g3pg_e	('BjSA', 'NTC')	BjSA	NTC
6036	EX_ala_B_e	GSMM_014	EX_4hbz_e	GSMM_024	EX_g3pg_e	('BjSA', 'NTC')	BjSA	NTC
6041	EX_ala_B_e	GSMM_354	EX_4hbz_e	GSMM_024	EX_g3pg_e	('BjSA', 'NTC')	BjSA	NTC
6042	EX_ala_B_e	GSMM_014	EX_pea_e	GSMM_024	EX_g3pg_e	('BjSA', 'NTC')	BjSA	NTC
6044	EX_ala_B_e	GSMM_014	EX_actn__R_e	GSMM_024	EX_g3pg_e	('BjSA', 'NTC')	BjSA	NTC
6047	EX_ala_B_e	GSMM_354	EX_actn__R_e	GSMM_024	EX_g3pg_e	('BjSA', 'NTC')	BjSA	NTC
6048	EX_ala_B_e	GSMM_014	EX_spmd_e	GSMM_024	EX_g3pg_e	('BjSA', 'NTC')	BjSA	NTC
6053	EX_ala_B_e	GSMM_354	EX_spmd_e	GSMM_024	EX_g3pg_e	('BjSA', 'NTC')	BjSA	NTC
6054	EX_ala_B_e	GSMM_014	EX_glu__L_e	GSMM_024	EX_g3pg_e	('BjSA', 'NTC')	BjSA	NTC
6059	EX_ala_B_e	GSMM_014	EX_4hbald_e	GSMM_024	EX_g3pg_e	('BjSA', 'NTC')	BjSA	NTC
6061	EX_ala_B_e	GSMM_354	EX_4hbald_e	GSMM_024	EX_g3pg_e	('BjSA', 'NTC')	BjSA	NTC
6063	EX_ala_B_e	GSMM_014	EX_cgly_e	GSMM_024	EX_g3pg_e	('BjSA', 'NTC')	BjSA	NTC
6070	EX_ala_B_e	GSMM_014	EX_glyc_e	GSMM_024	EX_g3pg_e	('BjSA', 'NTC')	BjSA	NTC
6077	EX_ala_B_e	GSMM_354	EX_glyc_e	GSMM_024	EX_g3pg_e	('BjSA', 'NTC')	BjSA	NTC
6079	EX_ala_B_e	GSMM_014	EX_fe3pyovd_kt_e	GSMM_024	EX_g3pg_e	('BjSA', 'NTC')	BjSA	NTC
6087	EX_ala_B_e	GSMM_354	EX_fe3pyovd_kt_e	GSMM_024	EX_g3pg_e	('BjSA', 'NTC')	BjSA	NTC
6089	EX_ala_B_e	GSMM_014	EX_pyovd_kt_e	GSMM_024	EX_g3pg_e	('BjSA', 'NTC')	BjSA	NTC
6097	EX_ala_B_e	GSMM_354	EX_pyovd_kt_e	GSMM_024	EX_g3pg_e	('BjSA', 'NTC')	BjSA	NTC
6099	EX_ala_B_e	GSMM_014	EX_ser__L_e	GSMM_024	EX_g3pg_e	('BjSA', 'NTC')	BjSA	NTC
6101	EX_ala_B_e	GSMM_354	EX_ser__L_e	GSMM_024	EX_g3pg_e	('BjSA', 'NTC')	BjSA	NTC
6103	EX_ala_B_e	GSMM_014	EX_ind3ac_e	GSMM_024	EX_g3pg_e	('BjSA', 'NTC')	BjSA	NTC
6111	EX_ala_B_e	GSMM_354	EX_ind3ac_e	GSMM_024	EX_g3pg_e	('BjSA', 'NTC')	BjSA	NTC
6113	EX_ala_B_e	GSMM_014	EX_urea_e	GSMM_024	EX_g3pg_e	('BjSA', 'NTC')	BjSA	NTC
6118	EX_ala_B_e	GSMM_354	EX_urea_e	GSMM_024	EX_g3pg_e	('BjSA', 'NTC')	BjSA	NTC
6120	EX_ala_B_e	GSMM_014	EX_glc__D_e	GSMM_024	EX_g3pg_e	('BjSA', 'NTC')	BjSA	NTC
6124	EX_ala_B_e	GSMM_354	EX_glc__D_e	GSMM_024	EX_g3pg_e	('BjSA', 'NTC')	BjSA	NTC
6126	EX_ala_B_e	GSMM_014	EX_pydxn_e	GSMM_024	EX_g3pg_e	('BjSA', 'NTC')	BjSA	NTC
6127	EX_ala_B_e	GSMM_354	EX_pydxn_e	GSMM_024	EX_g3pg_e	('BjSA', 'NTC')	BjSA	NTC
6128	EX_ala_B_e	GSMM_014	EX_chol_e	GSMM_024	EX_g3pg_e	('BjSA', 'NTC')	BjSA	NTC
6131	EX_ala_B_e	GSMM_354	EX_chol_e	GSMM_024	EX_g3pg_e	('BjSA', 'NTC')	BjSA	NTC
6133	EX_ala_B_e	GSMM_014	EX_cys__L_e	GSMM_024	EX_g3pg_e	('BjSA', 'NTC')	BjSA	NTC
6138	EX_ala_B_e	GSMM_354	EX_cys__L_e	GSMM_024	EX_g3pg_e	('BjSA', 'NTC')	BjSA	NTC
6139	EX_ala_B_e	GSMM_014	EX_orn_e	GSMM_024	EX_g3pg_e	('BjSA', 'NTC')	BjSA	NTC
6143	EX_ala_B_e	GSMM_354	EX_orn_e	GSMM_024	EX_g3pg_e	('BjSA', 'NTC')	BjSA	NTC
6145	EX_ala_B_e	GSMM_014	EX_pheme_e	GSMM_024	EX_g3pg_e	('BjSA', 'NTC')	BjSA	NTC
6164	EX_ala_B_e	GSMM_354	EX_4hba_e	GSMM_024	EX_g3pg_e	('BjSA', 'NTC')	BjSA	NTC
6171	EX_ala_B_e	GSMM_354	EX_gal_e	GSMM_024	EX_g3pg_e	('BjSA', 'NTC')	BjSA	NTC
6179	EX_ala_B_e	GSMM_354	EX_ala__D_e	GSMM_024	EX_g3pg_e	('BjSA', 'NTC')	BjSA	NTC
6197	EX_ala_B_e	GSMM_354	EX_ptrc_e	GSMM_024	EX_g3pg_e	('BjSA', 'NTC')	BjSA	NTC
6207	EX_ala_B_e	GSMM_354	EX_oxa_e	GSMM_024	EX_g3pg_e	('BjSA', 'NTC')	BjSA	NTC
6222	EX_ala_B_e	GSMM_354	EX_5dglcn_e	GSMM_024	EX_g3pg_e	('BjSA', 'NTC')	BjSA	NTC
6227	EX_ala_B_e	GSMM_354	EX_glcr_e	GSMM_024	EX_g3pg_e	('BjSA', 'NTC')	BjSA	NTC
6237	EX_ala_B_e	GSMM_354	EX_istfrnA_e	GSMM_024	EX_g3pg_e	('BjSA', 'NTC')	BjSA	NTC
6240	EX_ala_B_e	GSMM_354	EX_stfrnA_e	GSMM_024	EX_g3pg_e	('BjSA', 'NTC')	BjSA	NTC
6242	EX_ala_B_e	GSMM_014	EX_5drib_e	GSMM_208	EX_g3pg_e	('BjSA', 'BjSA')	BjSA	BjSA
6250	EX_ala_B_e	GSMM_354	EX_5drib_e	GSMM_208	EX_g3pg_e	('BjSA', 'BjSA')	BjSA	BjSA
6252	EX_ala_B_e	GSMM_014	EX_gthrd_e	GSMM_208	EX_g3pg_e	('BjSA', 'BjSA')	BjSA	BjSA
6257	EX_ala_B_e	GSMM_014	EX_etoh_e	GSMM_208	EX_g3pg_e	('BjSA', 'BjSA')	BjSA	BjSA
6263	EX_ala_B_e	GSMM_354	EX_etoh_e	GSMM_208	EX_g3pg_e	('BjSA', 'BjSA')	BjSA	BjSA
6265	EX_ala_B_e	GSMM_014	EX_glyc3p_e	GSMM_208	EX_g3pg_e	('BjSA', 'BjSA')	BjSA	BjSA
6267	EX_ala_B_e	GSMM_354	EX_glyc3p_e	GSMM_208	EX_g3pg_e	('BjSA', 'BjSA')	BjSA	BjSA
6268	EX_ala_B_e	GSMM_014	EX_5mdru1p_e	GSMM_208	EX_g3pg_e	('BjSA', 'BjSA')	BjSA	BjSA
6272	EX_ala_B_e	GSMM_354	EX_5mdru1p_e	GSMM_208	EX_g3pg_e	('BjSA', 'BjSA')	BjSA	BjSA
6273	EX_ala_B_e	GSMM_014	EX_fald_e	GSMM_208	EX_g3pg_e	('BjSA', 'BjSA')	BjSA	BjSA
6280	EX_ala_B_e	GSMM_354	EX_fald_e	GSMM_208	EX_g3pg_e	('BjSA', 'BjSA')	BjSA	BjSA
6282	EX_ala_B_e	GSMM_014	EX_rib__D_e	GSMM_208	EX_g3pg_e	('BjSA', 'BjSA')	BjSA	BjSA
6288	EX_ala_B_e	GSMM_354	EX_rib__D_e	GSMM_208	EX_g3pg_e	('BjSA', 'BjSA')	BjSA	BjSA
6290	EX_ala_B_e	GSMM_014	EX_4hbz_e	GSMM_208	EX_g3pg_e	('BjSA', 'BjSA')	BjSA	BjSA
6295	EX_ala_B_e	GSMM_354	EX_4hbz_e	GSMM_208	EX_g3pg_e	('BjSA', 'BjSA')	BjSA	BjSA
6296	EX_ala_B_e	GSMM_014	EX_actn__R_e	GSMM_208	EX_g3pg_e	('BjSA', 'BjSA')	BjSA	BjSA
6299	EX_ala_B_e	GSMM_354	EX_actn__R_e	GSMM_208	EX_g3pg_e	('BjSA', 'BjSA')	BjSA	BjSA
6300	EX_ala_B_e	GSMM_014	EX_spmd_e	GSMM_208	EX_g3pg_e	('BjSA', 'BjSA')	BjSA	BjSA
6305	EX_ala_B_e	GSMM_354	EX_spmd_e	GSMM_208	EX_g3pg_e	('BjSA', 'BjSA')	BjSA	BjSA
6306	EX_ala_B_e	GSMM_014	EX_glu__L_e	GSMM_208	EX_g3pg_e	('BjSA', 'BjSA')	BjSA	BjSA
6311	EX_ala_B_e	GSMM_014	EX_4hbald_e	GSMM_208	EX_g3pg_e	('BjSA', 'BjSA')	BjSA	BjSA
6313	EX_ala_B_e	GSMM_354	EX_4hbald_e	GSMM_208	EX_g3pg_e	('BjSA', 'BjSA')	BjSA	BjSA
6315	EX_ala_B_e	GSMM_014	EX_cgly_e	GSMM_208	EX_g3pg_e	('BjSA', 'BjSA')	BjSA	BjSA
6322	EX_ala_B_e	GSMM_014	EX_glyc_e	GSMM_208	EX_g3pg_e	('BjSA', 'BjSA')	BjSA	BjSA
6329	EX_ala_B_e	GSMM_354	EX_glyc_e	GSMM_208	EX_g3pg_e	('BjSA', 'BjSA')	BjSA	BjSA
6331	EX_ala_B_e	GSMM_014	EX_fe3pyovd_kt_e	GSMM_208	EX_g3pg_e	('BjSA', 'BjSA')	BjSA	BjSA
6339	EX_ala_B_e	GSMM_354	EX_fe3pyovd_kt_e	GSMM_208	EX_g3pg_e	('BjSA', 'BjSA')	BjSA	BjSA
6341	EX_ala_B_e	GSMM_014	EX_pyovd_kt_e	GSMM_208	EX_g3pg_e	('BjSA', 'BjSA')	BjSA	BjSA
6349	EX_ala_B_e	GSMM_354	EX_pyovd_kt_e	GSMM_208	EX_g3pg_e	('BjSA', 'BjSA')	BjSA	BjSA
6351	EX_ala_B_e	GSMM_014	EX_ser__L_e	GSMM_208	EX_g3pg_e	('BjSA', 'BjSA')	BjSA	BjSA
6353	EX_ala_B_e	GSMM_354	EX_ser__L_e	GSMM_208	EX_g3pg_e	('BjSA', 'BjSA')	BjSA	BjSA
6355	EX_ala_B_e	GSMM_014	EX_ind3ac_e	GSMM_208	EX_g3pg_e	('BjSA', 'BjSA')	BjSA	BjSA
6363	EX_ala_B_e	GSMM_354	EX_ind3ac_e	GSMM_208	EX_g3pg_e	('BjSA', 'BjSA')	BjSA	BjSA
6365	EX_ala_B_e	GSMM_014	EX_urea_e	GSMM_208	EX_g3pg_e	('BjSA', 'BjSA')	BjSA	BjSA
6370	EX_ala_B_e	GSMM_354	EX_urea_e	GSMM_208	EX_g3pg_e	('BjSA', 'BjSA')	BjSA	BjSA
6372	EX_ala_B_e	GSMM_014	EX_glc__D_e	GSMM_208	EX_g3pg_e	('BjSA', 'BjSA')	BjSA	BjSA
6376	EX_ala_B_e	GSMM_354	EX_glc__D_e	GSMM_208	EX_g3pg_e	('BjSA', 'BjSA')	BjSA	BjSA
6378	EX_ala_B_e	GSMM_014	EX_inost_e	GSMM_208	EX_g3pg_e	('BjSA', 'BjSA')	BjSA	BjSA
6380	EX_ala_B_e	GSMM_354	EX_inost_e	GSMM_208	EX_g3pg_e	('BjSA', 'BjSA')	BjSA	BjSA
6381	EX_ala_B_e	GSMM_014	EX_chol_e	GSMM_208	EX_g3pg_e	('BjSA', 'BjSA')	BjSA	BjSA
6384	EX_ala_B_e	GSMM_354	EX_chol_e	GSMM_208	EX_g3pg_e	('BjSA', 'BjSA')	BjSA	BjSA
6386	EX_ala_B_e	GSMM_014	EX_cys__L_e	GSMM_208	EX_g3pg_e	('BjSA', 'BjSA')	BjSA	BjSA
6391	EX_ala_B_e	GSMM_354	EX_cys__L_e	GSMM_208	EX_g3pg_e	('BjSA', 'BjSA')	BjSA	BjSA
6392	EX_ala_B_e	GSMM_014	EX_orn_e	GSMM_208	EX_g3pg_e	('BjSA', 'BjSA')	BjSA	BjSA
6396	EX_ala_B_e	GSMM_354	EX_orn_e	GSMM_208	EX_g3pg_e	('BjSA', 'BjSA')	BjSA	BjSA
6398	EX_ala_B_e	GSMM_014	EX_pheme_e	GSMM_208	EX_g3pg_e	('BjSA', 'BjSA')	BjSA	BjSA
6419	EX_ala_B_e	GSMM_354	EX_4hba_e	GSMM_208	EX_g3pg_e	('BjSA', 'BjSA')	BjSA	BjSA
6426	EX_ala_B_e	GSMM_354	EX_gal_e	GSMM_208	EX_g3pg_e	('BjSA', 'BjSA')	BjSA	BjSA
6451	EX_ala_B_e	GSMM_354	EX_ptrc_e	GSMM_208	EX_g3pg_e	('BjSA', 'BjSA')	BjSA	BjSA
6461	EX_ala_B_e	GSMM_354	EX_oxa_e	GSMM_208	EX_g3pg_e	('BjSA', 'BjSA')	BjSA	BjSA
6477	EX_ala_B_e	GSMM_354	EX_glcr_e	GSMM_208	EX_g3pg_e	('BjSA', 'BjSA')	BjSA	BjSA
6488	EX_ala_B_e	GSMM_014	EX_5drib_e	GSMM_380	EX_g3pg_e	('BjSA', 'Neutral')	BjSA	Neutral
6496	EX_ala_B_e	GSMM_354	EX_5drib_e	GSMM_380	EX_g3pg_e	('BjSA', 'Neutral')	BjSA	Neutral
6498	EX_ala_B_e	GSMM_014	EX_gthrd_e	GSMM_380	EX_g3pg_e	('BjSA', 'Neutral')	BjSA	Neutral
6503	EX_ala_B_e	GSMM_014	EX_rib__D_e	GSMM_380	EX_g3pg_e	('BjSA', 'Neutral')	BjSA	Neutral
6509	EX_ala_B_e	GSMM_354	EX_rib__D_e	GSMM_380	EX_g3pg_e	('BjSA', 'Neutral')	BjSA	Neutral
6511	EX_ala_B_e	GSMM_014	EX_pea_e	GSMM_380	EX_g3pg_e	('BjSA', 'Neutral')	BjSA	Neutral
6513	EX_ala_B_e	GSMM_014	EX_actn__R_e	GSMM_380	EX_g3pg_e	('BjSA', 'Neutral')	BjSA	Neutral
6516	EX_ala_B_e	GSMM_354	EX_actn__R_e	GSMM_380	EX_g3pg_e	('BjSA', 'Neutral')	BjSA	Neutral
6517	EX_ala_B_e	GSMM_014	EX_glu__L_e	GSMM_380	EX_g3pg_e	('BjSA', 'Neutral')	BjSA	Neutral
6522	EX_ala_B_e	GSMM_014	EX_cgly_e	GSMM_380	EX_g3pg_e	('BjSA', 'Neutral')	BjSA	Neutral
6529	EX_ala_B_e	GSMM_014	EX_glyc_e	GSMM_380	EX_g3pg_e	('BjSA', 'Neutral')	BjSA	Neutral
6536	EX_ala_B_e	GSMM_354	EX_glyc_e	GSMM_380	EX_g3pg_e	('BjSA', 'Neutral')	BjSA	Neutral
6538	EX_ala_B_e	GSMM_014	EX_fe3pyovd_kt_e	GSMM_380	EX_g3pg_e	('BjSA', 'Neutral')	BjSA	Neutral
6546	EX_ala_B_e	GSMM_354	EX_fe3pyovd_kt_e	GSMM_380	EX_g3pg_e	('BjSA', 'Neutral')	BjSA	Neutral
6548	EX_ala_B_e	GSMM_014	EX_pyovd_kt_e	GSMM_380	EX_g3pg_e	('BjSA', 'Neutral')	BjSA	Neutral
6556	EX_ala_B_e	GSMM_354	EX_pyovd_kt_e	GSMM_380	EX_g3pg_e	('BjSA', 'Neutral')	BjSA	Neutral
6558	EX_ala_B_e	GSMM_014	EX_ser__L_e	GSMM_380	EX_g3pg_e	('BjSA', 'Neutral')	BjSA	Neutral
6560	EX_ala_B_e	GSMM_354	EX_ser__L_e	GSMM_380	EX_g3pg_e	('BjSA', 'Neutral')	BjSA	Neutral
6562	EX_ala_B_e	GSMM_014	EX_urea_e	GSMM_380	EX_g3pg_e	('BjSA', 'Neutral')	BjSA	Neutral
6567	EX_ala_B_e	GSMM_354	EX_urea_e	GSMM_380	EX_g3pg_e	('BjSA', 'Neutral')	BjSA	Neutral
6569	EX_ala_B_e	GSMM_014	EX_glc__D_e	GSMM_380	EX_g3pg_e	('BjSA', 'Neutral')	BjSA	Neutral
6573	EX_ala_B_e	GSMM_354	EX_glc__D_e	GSMM_380	EX_g3pg_e	('BjSA', 'Neutral')	BjSA	Neutral
6575	EX_ala_B_e	GSMM_014	EX_inost_e	GSMM_380	EX_g3pg_e	('BjSA', 'Neutral')	BjSA	Neutral
6577	EX_ala_B_e	GSMM_354	EX_inost_e	GSMM_380	EX_g3pg_e	('BjSA', 'Neutral')	BjSA	Neutral
6578	EX_ala_B_e	GSMM_014	EX_chol_e	GSMM_380	EX_g3pg_e	('BjSA', 'Neutral')	BjSA	Neutral
6581	EX_ala_B_e	GSMM_354	EX_chol_e	GSMM_380	EX_g3pg_e	('BjSA', 'Neutral')	BjSA	Neutral
6583	EX_ala_B_e	GSMM_014	EX_cys__L_e	GSMM_380	EX_g3pg_e	('BjSA', 'Neutral')	BjSA	Neutral
6588	EX_ala_B_e	GSMM_354	EX_cys__L_e	GSMM_380	EX_g3pg_e	('BjSA', 'Neutral')	BjSA	Neutral
6589	EX_ala_B_e	GSMM_014	EX_orn_e	GSMM_380	EX_g3pg_e	('BjSA', 'Neutral')	BjSA	Neutral
6593	EX_ala_B_e	GSMM_354	EX_orn_e	GSMM_380	EX_g3pg_e	('BjSA', 'Neutral')	BjSA	Neutral
6595	EX_ala_B_e	GSMM_014	EX_pheme_e	GSMM_380	EX_g3pg_e	('BjSA', 'Neutral')	BjSA	Neutral
6619	EX_ala_B_e	GSMM_354	EX_gal_e	GSMM_380	EX_g3pg_e	('BjSA', 'Neutral')	BjSA	Neutral
6627	EX_ala_B_e	GSMM_354	EX_ala__D_e	GSMM_380	EX_g3pg_e	('BjSA', 'Neutral')	BjSA	Neutral
6644	EX_ala_B_e	GSMM_354	EX_ptrc_e	GSMM_380	EX_g3pg_e	('BjSA', 'Neutral')	BjSA	Neutral
6667	EX_ala_B_e	GSMM_014	EX_gthrd_e	GSMM_015	EX_bz_e	('BjSA', 'Neutral')	BjSA	Neutral
6672	EX_ala_B_e	GSMM_014	EX_etoh_e	GSMM_015	EX_bz_e	('BjSA', 'Neutral')	BjSA	Neutral
6678	EX_ala_B_e	GSMM_354	EX_etoh_e	GSMM_015	EX_bz_e	('BjSA', 'Neutral')	BjSA	Neutral
6680	EX_ala_B_e	GSMM_014	EX_glyc3p_e	GSMM_015	EX_bz_e	('BjSA', 'Neutral')	BjSA	Neutral
6682	EX_ala_B_e	GSMM_354	EX_glyc3p_e	GSMM_015	EX_bz_e	('BjSA', 'Neutral')	BjSA	Neutral
6683	EX_ala_B_e	GSMM_014	EX_ch4s_e	GSMM_015	EX_bz_e	('BjSA', 'Neutral')	BjSA	Neutral
6688	EX_ala_B_e	GSMM_354	EX_ch4s_e	GSMM_015	EX_bz_e	('BjSA', 'Neutral')	BjSA	Neutral
6690	EX_ala_B_e	GSMM_014	EX_fald_e	GSMM_015	EX_bz_e	('BjSA', 'Neutral')	BjSA	Neutral
6697	EX_ala_B_e	GSMM_354	EX_fald_e	GSMM_015	EX_bz_e	('BjSA', 'Neutral')	BjSA	Neutral
6699	EX_ala_B_e	GSMM_014	EX_4hbz_e	GSMM_015	EX_bz_e	('BjSA', 'Neutral')	BjSA	Neutral
6704	EX_ala_B_e	GSMM_354	EX_4hbz_e	GSMM_015	EX_bz_e	('BjSA', 'Neutral')	BjSA	Neutral
6705	EX_ala_B_e	GSMM_014	EX_pea_e	GSMM_015	EX_bz_e	('BjSA', 'Neutral')	BjSA	Neutral
6707	EX_ala_B_e	GSMM_014	EX_actn__R_e	GSMM_015	EX_bz_e	('BjSA', 'Neutral')	BjSA	Neutral
6710	EX_ala_B_e	GSMM_354	EX_actn__R_e	GSMM_015	EX_bz_e	('BjSA', 'Neutral')	BjSA	Neutral
6711	EX_ala_B_e	GSMM_014	EX_spmd_e	GSMM_015	EX_bz_e	('BjSA', 'Neutral')	BjSA	Neutral
6716	EX_ala_B_e	GSMM_354	EX_spmd_e	GSMM_015	EX_bz_e	('BjSA', 'Neutral')	BjSA	Neutral
6717	EX_ala_B_e	GSMM_014	EX_4hbald_e	GSMM_015	EX_bz_e	('BjSA', 'Neutral')	BjSA	Neutral
6719	EX_ala_B_e	GSMM_354	EX_4hbald_e	GSMM_015	EX_bz_e	('BjSA', 'Neutral')	BjSA	Neutral
6721	EX_ala_B_e	GSMM_014	EX_cgly_e	GSMM_015	EX_bz_e	('BjSA', 'Neutral')	BjSA	Neutral
6728	EX_ala_B_e	GSMM_014	EX_glyc_e	GSMM_015	EX_bz_e	('BjSA', 'Neutral')	BjSA	Neutral
6735	EX_ala_B_e	GSMM_354	EX_glyc_e	GSMM_015	EX_bz_e	('BjSA', 'Neutral')	BjSA	Neutral
6737	EX_ala_B_e	GSMM_014	EX_fe3pyovd_kt_e	GSMM_015	EX_bz_e	('BjSA', 'Neutral')	BjSA	Neutral
6745	EX_ala_B_e	GSMM_354	EX_fe3pyovd_kt_e	GSMM_015	EX_bz_e	('BjSA', 'Neutral')	BjSA	Neutral
6747	EX_ala_B_e	GSMM_014	EX_pyovd_kt_e	GSMM_015	EX_bz_e	('BjSA', 'Neutral')	BjSA	Neutral
6755	EX_ala_B_e	GSMM_354	EX_pyovd_kt_e	GSMM_015	EX_bz_e	('BjSA', 'Neutral')	BjSA	Neutral
6757	EX_ala_B_e	GSMM_014	EX_ser__L_e	GSMM_015	EX_bz_e	('BjSA', 'Neutral')	BjSA	Neutral
6759	EX_ala_B_e	GSMM_354	EX_ser__L_e	GSMM_015	EX_bz_e	('BjSA', 'Neutral')	BjSA	Neutral
6761	EX_ala_B_e	GSMM_014	EX_ind3ac_e	GSMM_015	EX_bz_e	('BjSA', 'Neutral')	BjSA	Neutral
6769	EX_ala_B_e	GSMM_354	EX_ind3ac_e	GSMM_015	EX_bz_e	('BjSA', 'Neutral')	BjSA	Neutral
6771	EX_ala_B_e	GSMM_014	EX_urea_e	GSMM_015	EX_bz_e	('BjSA', 'Neutral')	BjSA	Neutral
6776	EX_ala_B_e	GSMM_354	EX_urea_e	GSMM_015	EX_bz_e	('BjSA', 'Neutral')	BjSA	Neutral
6778	EX_ala_B_e	GSMM_014	EX_glc__D_e	GSMM_015	EX_bz_e	('BjSA', 'Neutral')	BjSA	Neutral
6782	EX_ala_B_e	GSMM_354	EX_glc__D_e	GSMM_015	EX_bz_e	('BjSA', 'Neutral')	BjSA	Neutral
6784	EX_ala_B_e	GSMM_014	EX_inost_e	GSMM_015	EX_bz_e	('BjSA', 'Neutral')	BjSA	Neutral
6786	EX_ala_B_e	GSMM_354	EX_inost_e	GSMM_015	EX_bz_e	('BjSA', 'Neutral')	BjSA	Neutral
6787	EX_ala_B_e	GSMM_014	EX_chol_e	GSMM_015	EX_bz_e	('BjSA', 'Neutral')	BjSA	Neutral
6790	EX_ala_B_e	GSMM_354	EX_chol_e	GSMM_015	EX_bz_e	('BjSA', 'Neutral')	BjSA	Neutral
6792	EX_ala_B_e	GSMM_014	EX_orn_e	GSMM_015	EX_bz_e	('BjSA', 'Neutral')	BjSA	Neutral
6796	EX_ala_B_e	GSMM_354	EX_orn_e	GSMM_015	EX_bz_e	('BjSA', 'Neutral')	BjSA	Neutral
6798	EX_ala_B_e	GSMM_014	EX_pheme_e	GSMM_015	EX_bz_e	('BjSA', 'Neutral')	BjSA	Neutral
6817	EX_ala_B_e	GSMM_354	EX_4hba_e	GSMM_015	EX_bz_e	('BjSA', 'Neutral')	BjSA	Neutral
6842	EX_ala_B_e	GSMM_354	EX_ptrc_e	GSMM_015	EX_bz_e	('BjSA', 'Neutral')	BjSA	Neutral
6851	EX_ala_B_e	GSMM_354	EX_oxa_e	GSMM_015	EX_bz_e	('BjSA', 'Neutral')	BjSA	Neutral
6872	EX_ala_B_e	GSMM_354	EX_glcr_e	GSMM_015	EX_bz_e	('BjSA', 'Neutral')	BjSA	Neutral
6878	EX_ala_B_e	GSMM_354	EX_dha_e	GSMM_015	EX_bz_e	('BjSA', 'Neutral')	BjSA	Neutral
6880	EX_ala_B_e	GSMM_014	EX_5drib_e	GSMM_122	EX_asp__L_e	('BjSA', 'Neutral')	BjSA	Neutral
6888	EX_ala_B_e	GSMM_354	EX_5drib_e	GSMM_122	EX_asp__L_e	('BjSA', 'Neutral')	BjSA	Neutral
6890	EX_ala_B_e	GSMM_014	EX_gthrd_e	GSMM_122	EX_asp__L_e	('BjSA', 'Neutral')	BjSA	Neutral
6895	EX_ala_B_e	GSMM_014	EX_etoh_e	GSMM_122	EX_asp__L_e	('BjSA', 'Neutral')	BjSA	Neutral
6901	EX_ala_B_e	GSMM_354	EX_etoh_e	GSMM_122	EX_asp__L_e	('BjSA', 'Neutral')	BjSA	Neutral
6903	EX_ala_B_e	GSMM_014	EX_glyc3p_e	GSMM_122	EX_asp__L_e	('BjSA', 'Neutral')	BjSA	Neutral
6905	EX_ala_B_e	GSMM_354	EX_glyc3p_e	GSMM_122	EX_asp__L_e	('BjSA', 'Neutral')	BjSA	Neutral
6906	EX_ala_B_e	GSMM_014	EX_ch4s_e	GSMM_122	EX_asp__L_e	('BjSA', 'Neutral')	BjSA	Neutral
6911	EX_ala_B_e	GSMM_354	EX_ch4s_e	GSMM_122	EX_asp__L_e	('BjSA', 'Neutral')	BjSA	Neutral
6913	EX_ala_B_e	GSMM_014	EX_5mdru1p_e	GSMM_122	EX_asp__L_e	('BjSA', 'Neutral')	BjSA	Neutral
6917	EX_ala_B_e	GSMM_354	EX_5mdru1p_e	GSMM_122	EX_asp__L_e	('BjSA', 'Neutral')	BjSA	Neutral
6918	EX_ala_B_e	GSMM_014	EX_fald_e	GSMM_122	EX_asp__L_e	('BjSA', 'Neutral')	BjSA	Neutral
6925	EX_ala_B_e	GSMM_354	EX_fald_e	GSMM_122	EX_asp__L_e	('BjSA', 'Neutral')	BjSA	Neutral
6927	EX_ala_B_e	GSMM_014	EX_rib__D_e	GSMM_122	EX_asp__L_e	('BjSA', 'Neutral')	BjSA	Neutral
6933	EX_ala_B_e	GSMM_354	EX_rib__D_e	GSMM_122	EX_asp__L_e	('BjSA', 'Neutral')	BjSA	Neutral
6935	EX_ala_B_e	GSMM_014	EX_4hbz_e	GSMM_122	EX_asp__L_e	('BjSA', 'Neutral')	BjSA	Neutral
6940	EX_ala_B_e	GSMM_354	EX_4hbz_e	GSMM_122	EX_asp__L_e	('BjSA', 'Neutral')	BjSA	Neutral
6941	EX_ala_B_e	GSMM_014	EX_pea_e	GSMM_122	EX_asp__L_e	('BjSA', 'Neutral')	BjSA	Neutral
6943	EX_ala_B_e	GSMM_014	EX_actn__R_e	GSMM_122	EX_asp__L_e	('BjSA', 'Neutral')	BjSA	Neutral
6946	EX_ala_B_e	GSMM_354	EX_actn__R_e	GSMM_122	EX_asp__L_e	('BjSA', 'Neutral')	BjSA	Neutral
6947	EX_ala_B_e	GSMM_014	EX_spmd_e	GSMM_122	EX_asp__L_e	('BjSA', 'Neutral')	BjSA	Neutral
6952	EX_ala_B_e	GSMM_354	EX_spmd_e	GSMM_122	EX_asp__L_e	('BjSA', 'Neutral')	BjSA	Neutral
6953	EX_ala_B_e	GSMM_014	EX_glu__L_e	GSMM_122	EX_asp__L_e	('BjSA', 'Neutral')	BjSA	Neutral
6958	EX_ala_B_e	GSMM_014	EX_4hbald_e	GSMM_122	EX_asp__L_e	('BjSA', 'Neutral')	BjSA	Neutral
6960	EX_ala_B_e	GSMM_354	EX_4hbald_e	GSMM_122	EX_asp__L_e	('BjSA', 'Neutral')	BjSA	Neutral
6962	EX_ala_B_e	GSMM_014	EX_cgly_e	GSMM_122	EX_asp__L_e	('BjSA', 'Neutral')	BjSA	Neutral
6969	EX_ala_B_e	GSMM_014	EX_glyc_e	GSMM_122	EX_asp__L_e	('BjSA', 'Neutral')	BjSA	Neutral
6976	EX_ala_B_e	GSMM_354	EX_glyc_e	GSMM_122	EX_asp__L_e	('BjSA', 'Neutral')	BjSA	Neutral
6978	EX_ala_B_e	GSMM_014	EX_fe3pyovd_kt_e	GSMM_122	EX_asp__L_e	('BjSA', 'Neutral')	BjSA	Neutral
6986	EX_ala_B_e	GSMM_354	EX_fe3pyovd_kt_e	GSMM_122	EX_asp__L_e	('BjSA', 'Neutral')	BjSA	Neutral
6988	EX_ala_B_e	GSMM_014	EX_pyovd_kt_e	GSMM_122	EX_asp__L_e	('BjSA', 'Neutral')	BjSA	Neutral
6996	EX_ala_B_e	GSMM_354	EX_pyovd_kt_e	GSMM_122	EX_asp__L_e	('BjSA', 'Neutral')	BjSA	Neutral
6998	EX_ala_B_e	GSMM_014	EX_ser__L_e	GSMM_122	EX_asp__L_e	('BjSA', 'Neutral')	BjSA	Neutral
7000	EX_ala_B_e	GSMM_354	EX_ser__L_e	GSMM_122	EX_asp__L_e	('BjSA', 'Neutral')	BjSA	Neutral
7002	EX_ala_B_e	GSMM_014	EX_ind3ac_e	GSMM_122	EX_asp__L_e	('BjSA', 'Neutral')	BjSA	Neutral
7010	EX_ala_B_e	GSMM_354	EX_ind3ac_e	GSMM_122	EX_asp__L_e	('BjSA', 'Neutral')	BjSA	Neutral
7012	EX_ala_B_e	GSMM_014	EX_urea_e	GSMM_122	EX_asp__L_e	('BjSA', 'Neutral')	BjSA	Neutral
7017	EX_ala_B_e	GSMM_354	EX_urea_e	GSMM_122	EX_asp__L_e	('BjSA', 'Neutral')	BjSA	Neutral
7019	EX_ala_B_e	GSMM_014	EX_glc__D_e	GSMM_122	EX_asp__L_e	('BjSA', 'Neutral')	BjSA	Neutral
7023	EX_ala_B_e	GSMM_354	EX_glc__D_e	GSMM_122	EX_asp__L_e	('BjSA', 'Neutral')	BjSA	Neutral
7025	EX_ala_B_e	GSMM_014	EX_pydxn_e	GSMM_122	EX_asp__L_e	('BjSA', 'Neutral')	BjSA	Neutral
7026	EX_ala_B_e	GSMM_354	EX_pydxn_e	GSMM_122	EX_asp__L_e	('BjSA', 'Neutral')	BjSA	Neutral
7027	EX_ala_B_e	GSMM_014	EX_chol_e	GSMM_122	EX_asp__L_e	('BjSA', 'Neutral')	BjSA	Neutral
7030	EX_ala_B_e	GSMM_354	EX_chol_e	GSMM_122	EX_asp__L_e	('BjSA', 'Neutral')	BjSA	Neutral
7032	EX_ala_B_e	GSMM_014	EX_cys__L_e	GSMM_122	EX_asp__L_e	('BjSA', 'Neutral')	BjSA	Neutral
7037	EX_ala_B_e	GSMM_354	EX_cys__L_e	GSMM_122	EX_asp__L_e	('BjSA', 'Neutral')	BjSA	Neutral
7038	EX_ala_B_e	GSMM_014	EX_orn_e	GSMM_122	EX_asp__L_e	('BjSA', 'Neutral')	BjSA	Neutral
7042	EX_ala_B_e	GSMM_354	EX_orn_e	GSMM_122	EX_asp__L_e	('BjSA', 'Neutral')	BjSA	Neutral
7044	EX_ala_B_e	GSMM_014	EX_pheme_e	GSMM_122	EX_asp__L_e	('BjSA', 'Neutral')	BjSA	Neutral
7066	EX_ala_B_e	GSMM_354	EX_4hba_e	GSMM_122	EX_asp__L_e	('BjSA', 'Neutral')	BjSA	Neutral
7073	EX_ala_B_e	GSMM_354	EX_gal_e	GSMM_122	EX_asp__L_e	('BjSA', 'Neutral')	BjSA	Neutral
7100	EX_ala_B_e	GSMM_354	EX_ptrc_e	GSMM_122	EX_asp__L_e	('BjSA', 'Neutral')	BjSA	Neutral
7110	EX_ala_B_e	GSMM_354	EX_oxa_e	GSMM_122	EX_asp__L_e	('BjSA', 'Neutral')	BjSA	Neutral
7132	EX_ala_B_e	GSMM_354	EX_udcpp_e	GSMM_122	EX_asp__L_e	('BjSA', 'Neutral')	BjSA	Neutral
7137	EX_ala_B_e	GSMM_354	EX_istfrnA_e	GSMM_122	EX_asp__L_e	('BjSA', 'Neutral')	BjSA	Neutral
7141	EX_ala_B_e	GSMM_354	EX_stfrnA_e	GSMM_122	EX_asp__L_e	('BjSA', 'Neutral')	BjSA	Neutral
7142	EX_ala_B_e	GSMM_354	EX_dha_e	GSMM_122	EX_asp__L_e	('BjSA', 'Neutral')	BjSA	Neutral
7144	EX_ala_B_e	GSMM_014	EX_5drib_e	GSMM_230	EX_asp__L_e	('BjSA', 'Neutral')	BjSA	Neutral
7152	EX_ala_B_e	GSMM_354	EX_5drib_e	GSMM_230	EX_asp__L_e	('BjSA', 'Neutral')	BjSA	Neutral
7154	EX_ala_B_e	GSMM_014	EX_gthrd_e	GSMM_230	EX_asp__L_e	('BjSA', 'Neutral')	BjSA	Neutral
7159	EX_ala_B_e	GSMM_014	EX_etoh_e	GSMM_230	EX_asp__L_e	('BjSA', 'Neutral')	BjSA	Neutral
7165	EX_ala_B_e	GSMM_354	EX_etoh_e	GSMM_230	EX_asp__L_e	('BjSA', 'Neutral')	BjSA	Neutral
7167	EX_ala_B_e	GSMM_014	EX_glyc3p_e	GSMM_230	EX_asp__L_e	('BjSA', 'Neutral')	BjSA	Neutral
7169	EX_ala_B_e	GSMM_354	EX_glyc3p_e	GSMM_230	EX_asp__L_e	('BjSA', 'Neutral')	BjSA	Neutral
7170	EX_ala_B_e	GSMM_014	EX_5mdru1p_e	GSMM_230	EX_asp__L_e	('BjSA', 'Neutral')	BjSA	Neutral
7174	EX_ala_B_e	GSMM_354	EX_5mdru1p_e	GSMM_230	EX_asp__L_e	('BjSA', 'Neutral')	BjSA	Neutral
7175	EX_ala_B_e	GSMM_014	EX_fald_e	GSMM_230	EX_asp__L_e	('BjSA', 'Neutral')	BjSA	Neutral
7182	EX_ala_B_e	GSMM_354	EX_fald_e	GSMM_230	EX_asp__L_e	('BjSA', 'Neutral')	BjSA	Neutral
7184	EX_ala_B_e	GSMM_014	EX_rib__D_e	GSMM_230	EX_asp__L_e	('BjSA', 'Neutral')	BjSA	Neutral
7190	EX_ala_B_e	GSMM_354	EX_rib__D_e	GSMM_230	EX_asp__L_e	('BjSA', 'Neutral')	BjSA	Neutral
7192	EX_ala_B_e	GSMM_014	EX_4hbz_e	GSMM_230	EX_asp__L_e	('BjSA', 'Neutral')	BjSA	Neutral
7197	EX_ala_B_e	GSMM_354	EX_4hbz_e	GSMM_230	EX_asp__L_e	('BjSA', 'Neutral')	BjSA	Neutral
7198	EX_ala_B_e	GSMM_014	EX_pea_e	GSMM_230	EX_asp__L_e	('BjSA', 'Neutral')	BjSA	Neutral
7200	EX_ala_B_e	GSMM_014	EX_actn__R_e	GSMM_230	EX_asp__L_e	('BjSA', 'Neutral')	BjSA	Neutral
7203	EX_ala_B_e	GSMM_354	EX_actn__R_e	GSMM_230	EX_asp__L_e	('BjSA', 'Neutral')	BjSA	Neutral
7204	EX_ala_B_e	GSMM_014	EX_spmd_e	GSMM_230	EX_asp__L_e	('BjSA', 'Neutral')	BjSA	Neutral
7209	EX_ala_B_e	GSMM_354	EX_spmd_e	GSMM_230	EX_asp__L_e	('BjSA', 'Neutral')	BjSA	Neutral
7210	EX_ala_B_e	GSMM_014	EX_glu__L_e	GSMM_230	EX_asp__L_e	('BjSA', 'Neutral')	BjSA	Neutral
7215	EX_ala_B_e	GSMM_014	EX_4hbald_e	GSMM_230	EX_asp__L_e	('BjSA', 'Neutral')	BjSA	Neutral
7217	EX_ala_B_e	GSMM_354	EX_4hbald_e	GSMM_230	EX_asp__L_e	('BjSA', 'Neutral')	BjSA	Neutral
7219	EX_ala_B_e	GSMM_014	EX_cgly_e	GSMM_230	EX_asp__L_e	('BjSA', 'Neutral')	BjSA	Neutral
7226	EX_ala_B_e	GSMM_014	EX_glyc_e	GSMM_230	EX_asp__L_e	('BjSA', 'Neutral')	BjSA	Neutral
7233	EX_ala_B_e	GSMM_354	EX_glyc_e	GSMM_230	EX_asp__L_e	('BjSA', 'Neutral')	BjSA	Neutral
7235	EX_ala_B_e	GSMM_014	EX_fe3pyovd_kt_e	GSMM_230	EX_asp__L_e	('BjSA', 'Neutral')	BjSA	Neutral
7243	EX_ala_B_e	GSMM_354	EX_fe3pyovd_kt_e	GSMM_230	EX_asp__L_e	('BjSA', 'Neutral')	BjSA	Neutral
7245	EX_ala_B_e	GSMM_014	EX_pyovd_kt_e	GSMM_230	EX_asp__L_e	('BjSA', 'Neutral')	BjSA	Neutral
7253	EX_ala_B_e	GSMM_354	EX_pyovd_kt_e	GSMM_230	EX_asp__L_e	('BjSA', 'Neutral')	BjSA	Neutral
7255	EX_ala_B_e	GSMM_014	EX_ser__L_e	GSMM_230	EX_asp__L_e	('BjSA', 'Neutral')	BjSA	Neutral
7257	EX_ala_B_e	GSMM_354	EX_ser__L_e	GSMM_230	EX_asp__L_e	('BjSA', 'Neutral')	BjSA	Neutral
7259	EX_ala_B_e	GSMM_014	EX_ind3ac_e	GSMM_230	EX_asp__L_e	('BjSA', 'Neutral')	BjSA	Neutral
7267	EX_ala_B_e	GSMM_354	EX_ind3ac_e	GSMM_230	EX_asp__L_e	('BjSA', 'Neutral')	BjSA	Neutral
7269	EX_ala_B_e	GSMM_014	EX_glc__D_e	GSMM_230	EX_asp__L_e	('BjSA', 'Neutral')	BjSA	Neutral
7273	EX_ala_B_e	GSMM_354	EX_glc__D_e	GSMM_230	EX_asp__L_e	('BjSA', 'Neutral')	BjSA	Neutral
7275	EX_ala_B_e	GSMM_014	EX_inost_e	GSMM_230	EX_asp__L_e	('BjSA', 'Neutral')	BjSA	Neutral
7277	EX_ala_B_e	GSMM_354	EX_inost_e	GSMM_230	EX_asp__L_e	('BjSA', 'Neutral')	BjSA	Neutral
7278	EX_ala_B_e	GSMM_014	EX_chol_e	GSMM_230	EX_asp__L_e	('BjSA', 'Neutral')	BjSA	Neutral
7281	EX_ala_B_e	GSMM_354	EX_chol_e	GSMM_230	EX_asp__L_e	('BjSA', 'Neutral')	BjSA	Neutral
7283	EX_ala_B_e	GSMM_014	EX_cys__L_e	GSMM_230	EX_asp__L_e	('BjSA', 'Neutral')	BjSA	Neutral
7288	EX_ala_B_e	GSMM_354	EX_cys__L_e	GSMM_230	EX_asp__L_e	('BjSA', 'Neutral')	BjSA	Neutral
7289	EX_ala_B_e	GSMM_014	EX_orn_e	GSMM_230	EX_asp__L_e	('BjSA', 'Neutral')	BjSA	Neutral
7293	EX_ala_B_e	GSMM_354	EX_orn_e	GSMM_230	EX_asp__L_e	('BjSA', 'Neutral')	BjSA	Neutral
7295	EX_ala_B_e	GSMM_014	EX_pheme_e	GSMM_230	EX_asp__L_e	('BjSA', 'Neutral')	BjSA	Neutral
7316	EX_ala_B_e	GSMM_354	EX_4hba_e	GSMM_230	EX_asp__L_e	('BjSA', 'Neutral')	BjSA	Neutral
7323	EX_ala_B_e	GSMM_354	EX_gal_e	GSMM_230	EX_asp__L_e	('BjSA', 'Neutral')	BjSA	Neutral
7346	EX_ala_B_e	GSMM_354	EX_ptrc_e	GSMM_230	EX_asp__L_e	('BjSA', 'Neutral')	BjSA	Neutral
7356	EX_ala_B_e	GSMM_354	EX_oxa_e	GSMM_230	EX_asp__L_e	('BjSA', 'Neutral')	BjSA	Neutral
7371	EX_ala_B_e	GSMM_354	EX_5dglcn_e	GSMM_230	EX_asp__L_e	('BjSA', 'Neutral')	BjSA	Neutral
7385	EX_ala_B_e	GSMM_354	EX_istfrnA_e	GSMM_230	EX_asp__L_e	('BjSA', 'Neutral')	BjSA	Neutral
7390	EX_ala_B_e	GSMM_354	EX_stfrnA_e	GSMM_230	EX_asp__L_e	('BjSA', 'Neutral')	BjSA	Neutral
7391	EX_ala_B_e	GSMM_014	EX_5drib_e	GSMM_323	EX_asp__L_e	('BjSA', 'Neutral')	BjSA	Neutral
7399	EX_ala_B_e	GSMM_354	EX_5drib_e	GSMM_323	EX_asp__L_e	('BjSA', 'Neutral')	BjSA	Neutral
7401	EX_ala_B_e	GSMM_014	EX_gthrd_e	GSMM_323	EX_asp__L_e	('BjSA', 'Neutral')	BjSA	Neutral
7406	EX_ala_B_e	GSMM_014	EX_etoh_e	GSMM_323	EX_asp__L_e	('BjSA', 'Neutral')	BjSA	Neutral
7412	EX_ala_B_e	GSMM_354	EX_etoh_e	GSMM_323	EX_asp__L_e	('BjSA', 'Neutral')	BjSA	Neutral
7414	EX_ala_B_e	GSMM_014	EX_glyc3p_e	GSMM_323	EX_asp__L_e	('BjSA', 'Neutral')	BjSA	Neutral
7416	EX_ala_B_e	GSMM_354	EX_glyc3p_e	GSMM_323	EX_asp__L_e	('BjSA', 'Neutral')	BjSA	Neutral
7417	EX_ala_B_e	GSMM_014	EX_fald_e	GSMM_323	EX_asp__L_e	('BjSA', 'Neutral')	BjSA	Neutral
7424	EX_ala_B_e	GSMM_354	EX_fald_e	GSMM_323	EX_asp__L_e	('BjSA', 'Neutral')	BjSA	Neutral
7426	EX_ala_B_e	GSMM_014	EX_rib__D_e	GSMM_323	EX_asp__L_e	('BjSA', 'Neutral')	BjSA	Neutral
7432	EX_ala_B_e	GSMM_354	EX_rib__D_e	GSMM_323	EX_asp__L_e	('BjSA', 'Neutral')	BjSA	Neutral
7434	EX_ala_B_e	GSMM_014	EX_4hbz_e	GSMM_323	EX_asp__L_e	('BjSA', 'Neutral')	BjSA	Neutral
7439	EX_ala_B_e	GSMM_354	EX_4hbz_e	GSMM_323	EX_asp__L_e	('BjSA', 'Neutral')	BjSA	Neutral
7440	EX_ala_B_e	GSMM_014	EX_pea_e	GSMM_323	EX_asp__L_e	('BjSA', 'Neutral')	BjSA	Neutral
7442	EX_ala_B_e	GSMM_014	EX_actn__R_e	GSMM_323	EX_asp__L_e	('BjSA', 'Neutral')	BjSA	Neutral
7445	EX_ala_B_e	GSMM_354	EX_actn__R_e	GSMM_323	EX_asp__L_e	('BjSA', 'Neutral')	BjSA	Neutral
7446	EX_ala_B_e	GSMM_014	EX_spmd_e	GSMM_323	EX_asp__L_e	('BjSA', 'Neutral')	BjSA	Neutral
7451	EX_ala_B_e	GSMM_354	EX_spmd_e	GSMM_323	EX_asp__L_e	('BjSA', 'Neutral')	BjSA	Neutral
7452	EX_ala_B_e	GSMM_014	EX_glu__L_e	GSMM_323	EX_asp__L_e	('BjSA', 'Neutral')	BjSA	Neutral
7457	EX_ala_B_e	GSMM_014	EX_4hbald_e	GSMM_323	EX_asp__L_e	('BjSA', 'Neutral')	BjSA	Neutral
7459	EX_ala_B_e	GSMM_354	EX_4hbald_e	GSMM_323	EX_asp__L_e	('BjSA', 'Neutral')	BjSA	Neutral
7461	EX_ala_B_e	GSMM_014	EX_cgly_e	GSMM_323	EX_asp__L_e	('BjSA', 'Neutral')	BjSA	Neutral
7468	EX_ala_B_e	GSMM_014	EX_glyc_e	GSMM_323	EX_asp__L_e	('BjSA', 'Neutral')	BjSA	Neutral
7475	EX_ala_B_e	GSMM_354	EX_glyc_e	GSMM_323	EX_asp__L_e	('BjSA', 'Neutral')	BjSA	Neutral
7477	EX_ala_B_e	GSMM_014	EX_fe3pyovd_kt_e	GSMM_323	EX_asp__L_e	('BjSA', 'Neutral')	BjSA	Neutral
7485	EX_ala_B_e	GSMM_354	EX_fe3pyovd_kt_e	GSMM_323	EX_asp__L_e	('BjSA', 'Neutral')	BjSA	Neutral
7487	EX_ala_B_e	GSMM_014	EX_pyovd_kt_e	GSMM_323	EX_asp__L_e	('BjSA', 'Neutral')	BjSA	Neutral
7495	EX_ala_B_e	GSMM_354	EX_pyovd_kt_e	GSMM_323	EX_asp__L_e	('BjSA', 'Neutral')	BjSA	Neutral
7497	EX_ala_B_e	GSMM_014	EX_ser__L_e	GSMM_323	EX_asp__L_e	('BjSA', 'Neutral')	BjSA	Neutral
7499	EX_ala_B_e	GSMM_354	EX_ser__L_e	GSMM_323	EX_asp__L_e	('BjSA', 'Neutral')	BjSA	Neutral
7501	EX_ala_B_e	GSMM_014	EX_ind3ac_e	GSMM_323	EX_asp__L_e	('BjSA', 'Neutral')	BjSA	Neutral
7509	EX_ala_B_e	GSMM_354	EX_ind3ac_e	GSMM_323	EX_asp__L_e	('BjSA', 'Neutral')	BjSA	Neutral
7511	EX_ala_B_e	GSMM_014	EX_urea_e	GSMM_323	EX_asp__L_e	('BjSA', 'Neutral')	BjSA	Neutral
7516	EX_ala_B_e	GSMM_354	EX_urea_e	GSMM_323	EX_asp__L_e	('BjSA', 'Neutral')	BjSA	Neutral
7518	EX_ala_B_e	GSMM_014	EX_glc__D_e	GSMM_323	EX_asp__L_e	('BjSA', 'Neutral')	BjSA	Neutral
7522	EX_ala_B_e	GSMM_354	EX_glc__D_e	GSMM_323	EX_asp__L_e	('BjSA', 'Neutral')	BjSA	Neutral
7524	EX_ala_B_e	GSMM_014	EX_inost_e	GSMM_323	EX_asp__L_e	('BjSA', 'Neutral')	BjSA	Neutral
7526	EX_ala_B_e	GSMM_354	EX_inost_e	GSMM_323	EX_asp__L_e	('BjSA', 'Neutral')	BjSA	Neutral
7527	EX_ala_B_e	GSMM_014	EX_pydxn_e	GSMM_323	EX_asp__L_e	('BjSA', 'Neutral')	BjSA	Neutral
7528	EX_ala_B_e	GSMM_354	EX_pydxn_e	GSMM_323	EX_asp__L_e	('BjSA', 'Neutral')	BjSA	Neutral
7529	EX_ala_B_e	GSMM_014	EX_chol_e	GSMM_323	EX_asp__L_e	('BjSA', 'Neutral')	BjSA	Neutral
7532	EX_ala_B_e	GSMM_354	EX_chol_e	GSMM_323	EX_asp__L_e	('BjSA', 'Neutral')	BjSA	Neutral
7534	EX_ala_B_e	GSMM_014	EX_cys__L_e	GSMM_323	EX_asp__L_e	('BjSA', 'Neutral')	BjSA	Neutral
7539	EX_ala_B_e	GSMM_354	EX_cys__L_e	GSMM_323	EX_asp__L_e	('BjSA', 'Neutral')	BjSA	Neutral
7540	EX_ala_B_e	GSMM_014	EX_orn_e	GSMM_323	EX_asp__L_e	('BjSA', 'Neutral')	BjSA	Neutral
7544	EX_ala_B_e	GSMM_354	EX_orn_e	GSMM_323	EX_asp__L_e	('BjSA', 'Neutral')	BjSA	Neutral
7563	EX_ala_B_e	GSMM_354	EX_4hba_e	GSMM_323	EX_asp__L_e	('BjSA', 'Neutral')	BjSA	Neutral
7570	EX_ala_B_e	GSMM_354	EX_gal_e	GSMM_323	EX_asp__L_e	('BjSA', 'Neutral')	BjSA	Neutral
7578	EX_ala_B_e	GSMM_354	EX_ala__D_e	GSMM_323	EX_asp__L_e	('BjSA', 'Neutral')	BjSA	Neutral
7595	EX_ala_B_e	GSMM_354	EX_ptrc_e	GSMM_323	EX_asp__L_e	('BjSA', 'Neutral')	BjSA	Neutral
7605	EX_ala_B_e	GSMM_354	EX_oxa_e	GSMM_323	EX_asp__L_e	('BjSA', 'Neutral')	BjSA	Neutral
7621	EX_ala_B_e	GSMM_354	EX_glcr_e	GSMM_323	EX_asp__L_e	('BjSA', 'Neutral')	BjSA	Neutral
7636	EX_ala_B_e	GSMM_354	EX_stfrnA_e	GSMM_323	EX_asp__L_e	('BjSA', 'Neutral')	BjSA	Neutral
7637	EX_ala_B_e	GSMM_014	EX_5drib_e	GSMM_316	EX_xyl__D_e	('BjSA', 'Neutral')	BjSA	Neutral
7645	EX_ala_B_e	GSMM_354	EX_5drib_e	GSMM_316	EX_xyl__D_e	('BjSA', 'Neutral')	BjSA	Neutral
7647	EX_ala_B_e	GSMM_014	EX_gthrd_e	GSMM_316	EX_xyl__D_e	('BjSA', 'Neutral')	BjSA	Neutral
7652	EX_ala_B_e	GSMM_014	EX_etoh_e	GSMM_316	EX_xyl__D_e	('BjSA', 'Neutral')	BjSA	Neutral
7658	EX_ala_B_e	GSMM_354	EX_etoh_e	GSMM_316	EX_xyl__D_e	('BjSA', 'Neutral')	BjSA	Neutral
7660	EX_ala_B_e	GSMM_014	EX_glyc3p_e	GSMM_316	EX_xyl__D_e	('BjSA', 'Neutral')	BjSA	Neutral
7662	EX_ala_B_e	GSMM_354	EX_glyc3p_e	GSMM_316	EX_xyl__D_e	('BjSA', 'Neutral')	BjSA	Neutral
7663	EX_ala_B_e	GSMM_014	EX_5mdru1p_e	GSMM_316	EX_xyl__D_e	('BjSA', 'Neutral')	BjSA	Neutral
7667	EX_ala_B_e	GSMM_354	EX_5mdru1p_e	GSMM_316	EX_xyl__D_e	('BjSA', 'Neutral')	BjSA	Neutral
7668	EX_ala_B_e	GSMM_014	EX_pacald_e	GSMM_316	EX_xyl__D_e	('BjSA', 'Neutral')	BjSA	Neutral
7671	EX_ala_B_e	GSMM_014	EX_fald_e	GSMM_316	EX_xyl__D_e	('BjSA', 'Neutral')	BjSA	Neutral
7678	EX_ala_B_e	GSMM_354	EX_fald_e	GSMM_316	EX_xyl__D_e	('BjSA', 'Neutral')	BjSA	Neutral
7680	EX_ala_B_e	GSMM_014	EX_rib__D_e	GSMM_316	EX_xyl__D_e	('BjSA', 'Neutral')	BjSA	Neutral
7686	EX_ala_B_e	GSMM_354	EX_rib__D_e	GSMM_316	EX_xyl__D_e	('BjSA', 'Neutral')	BjSA	Neutral
7688	EX_ala_B_e	GSMM_014	EX_4hbz_e	GSMM_316	EX_xyl__D_e	('BjSA', 'Neutral')	BjSA	Neutral
7693	EX_ala_B_e	GSMM_354	EX_4hbz_e	GSMM_316	EX_xyl__D_e	('BjSA', 'Neutral')	BjSA	Neutral
7694	EX_ala_B_e	GSMM_014	EX_pea_e	GSMM_316	EX_xyl__D_e	('BjSA', 'Neutral')	BjSA	Neutral
7696	EX_ala_B_e	GSMM_014	EX_actn__R_e	GSMM_316	EX_xyl__D_e	('BjSA', 'Neutral')	BjSA	Neutral
7699	EX_ala_B_e	GSMM_354	EX_actn__R_e	GSMM_316	EX_xyl__D_e	('BjSA', 'Neutral')	BjSA	Neutral
7700	EX_ala_B_e	GSMM_014	EX_spmd_e	GSMM_316	EX_xyl__D_e	('BjSA', 'Neutral')	BjSA	Neutral
7705	EX_ala_B_e	GSMM_354	EX_spmd_e	GSMM_316	EX_xyl__D_e	('BjSA', 'Neutral')	BjSA	Neutral
7706	EX_ala_B_e	GSMM_014	EX_glu__L_e	GSMM_316	EX_xyl__D_e	('BjSA', 'Neutral')	BjSA	Neutral
7711	EX_ala_B_e	GSMM_014	EX_4hbald_e	GSMM_316	EX_xyl__D_e	('BjSA', 'Neutral')	BjSA	Neutral
7713	EX_ala_B_e	GSMM_354	EX_4hbald_e	GSMM_316	EX_xyl__D_e	('BjSA', 'Neutral')	BjSA	Neutral
7715	EX_ala_B_e	GSMM_014	EX_cgly_e	GSMM_316	EX_xyl__D_e	('BjSA', 'Neutral')	BjSA	Neutral
7722	EX_ala_B_e	GSMM_014	EX_glyc_e	GSMM_316	EX_xyl__D_e	('BjSA', 'Neutral')	BjSA	Neutral
7729	EX_ala_B_e	GSMM_354	EX_glyc_e	GSMM_316	EX_xyl__D_e	('BjSA', 'Neutral')	BjSA	Neutral
7731	EX_ala_B_e	GSMM_014	EX_fe3pyovd_kt_e	GSMM_316	EX_xyl__D_e	('BjSA', 'Neutral')	BjSA	Neutral
7739	EX_ala_B_e	GSMM_354	EX_fe3pyovd_kt_e	GSMM_316	EX_xyl__D_e	('BjSA', 'Neutral')	BjSA	Neutral
7741	EX_ala_B_e	GSMM_014	EX_pyovd_kt_e	GSMM_316	EX_xyl__D_e	('BjSA', 'Neutral')	BjSA	Neutral
7749	EX_ala_B_e	GSMM_354	EX_pyovd_kt_e	GSMM_316	EX_xyl__D_e	('BjSA', 'Neutral')	BjSA	Neutral
7751	EX_ala_B_e	GSMM_014	EX_ser__L_e	GSMM_316	EX_xyl__D_e	('BjSA', 'Neutral')	BjSA	Neutral
7753	EX_ala_B_e	GSMM_354	EX_ser__L_e	GSMM_316	EX_xyl__D_e	('BjSA', 'Neutral')	BjSA	Neutral
7755	EX_ala_B_e	GSMM_014	EX_ind3ac_e	GSMM_316	EX_xyl__D_e	('BjSA', 'Neutral')	BjSA	Neutral
7763	EX_ala_B_e	GSMM_354	EX_ind3ac_e	GSMM_316	EX_xyl__D_e	('BjSA', 'Neutral')	BjSA	Neutral
7765	EX_ala_B_e	GSMM_014	EX_urea_e	GSMM_316	EX_xyl__D_e	('BjSA', 'Neutral')	BjSA	Neutral
7770	EX_ala_B_e	GSMM_354	EX_urea_e	GSMM_316	EX_xyl__D_e	('BjSA', 'Neutral')	BjSA	Neutral
7772	EX_ala_B_e	GSMM_014	EX_glc__D_e	GSMM_316	EX_xyl__D_e	('BjSA', 'Neutral')	BjSA	Neutral
7776	EX_ala_B_e	GSMM_354	EX_glc__D_e	GSMM_316	EX_xyl__D_e	('BjSA', 'Neutral')	BjSA	Neutral
7778	EX_ala_B_e	GSMM_014	EX_chol_e	GSMM_316	EX_xyl__D_e	('BjSA', 'Neutral')	BjSA	Neutral
7781	EX_ala_B_e	GSMM_354	EX_chol_e	GSMM_316	EX_xyl__D_e	('BjSA', 'Neutral')	BjSA	Neutral
7783	EX_ala_B_e	GSMM_014	EX_cys__L_e	GSMM_316	EX_xyl__D_e	('BjSA', 'Neutral')	BjSA	Neutral
7788	EX_ala_B_e	GSMM_354	EX_cys__L_e	GSMM_316	EX_xyl__D_e	('BjSA', 'Neutral')	BjSA	Neutral
7789	EX_ala_B_e	GSMM_014	EX_orn_e	GSMM_316	EX_xyl__D_e	('BjSA', 'Neutral')	BjSA	Neutral
7793	EX_ala_B_e	GSMM_354	EX_orn_e	GSMM_316	EX_xyl__D_e	('BjSA', 'Neutral')	BjSA	Neutral
7795	EX_ala_B_e	GSMM_014	EX_pheme_e	GSMM_316	EX_xyl__D_e	('BjSA', 'Neutral')	BjSA	Neutral
7818	EX_ala_B_e	GSMM_354	EX_gal_e	GSMM_316	EX_xyl__D_e	('BjSA', 'Neutral')	BjSA	Neutral
7847	EX_ala_B_e	GSMM_354	EX_ptrc_e	GSMM_316	EX_xyl__D_e	('BjSA', 'Neutral')	BjSA	Neutral
7857	EX_ala_B_e	GSMM_354	EX_oxa_e	GSMM_316	EX_xyl__D_e	('BjSA', 'Neutral')	BjSA	Neutral
7870	EX_ala_B_e	GSMM_354	EX_5dglcn_e	GSMM_316	EX_xyl__D_e	('BjSA', 'Neutral')	BjSA	Neutral
7876	EX_ala_B_e	GSMM_354	EX_glcr_e	GSMM_316	EX_xyl__D_e	('BjSA', 'Neutral')	BjSA	Neutral
7879	EX_ala_B_e	GSMM_354	EX_udcpp_e	GSMM_316	EX_xyl__D_e	('BjSA', 'Neutral')	BjSA	Neutral
7888	EX_ala_B_e	GSMM_014	EX_5drib_e	GSMM_005	EX_isocap_e	('BjSA', 'Neutral')	BjSA	Neutral
7896	EX_ala_B_e	GSMM_354	EX_5drib_e	GSMM_005	EX_isocap_e	('BjSA', 'Neutral')	BjSA	Neutral
7898	EX_ala_B_e	GSMM_014	EX_gthrd_e	GSMM_005	EX_isocap_e	('BjSA', 'Neutral')	BjSA	Neutral
7903	EX_ala_B_e	GSMM_014	EX_etoh_e	GSMM_005	EX_isocap_e	('BjSA', 'Neutral')	BjSA	Neutral
7909	EX_ala_B_e	GSMM_354	EX_etoh_e	GSMM_005	EX_isocap_e	('BjSA', 'Neutral')	BjSA	Neutral
7911	EX_ala_B_e	GSMM_014	EX_glyc3p_e	GSMM_005	EX_isocap_e	('BjSA', 'Neutral')	BjSA	Neutral
7913	EX_ala_B_e	GSMM_354	EX_glyc3p_e	GSMM_005	EX_isocap_e	('BjSA', 'Neutral')	BjSA	Neutral
7914	EX_ala_B_e	GSMM_014	EX_5mdru1p_e	GSMM_005	EX_isocap_e	('BjSA', 'Neutral')	BjSA	Neutral
7918	EX_ala_B_e	GSMM_354	EX_5mdru1p_e	GSMM_005	EX_isocap_e	('BjSA', 'Neutral')	BjSA	Neutral
7919	EX_ala_B_e	GSMM_014	EX_fald_e	GSMM_005	EX_isocap_e	('BjSA', 'Neutral')	BjSA	Neutral
7926	EX_ala_B_e	GSMM_354	EX_fald_e	GSMM_005	EX_isocap_e	('BjSA', 'Neutral')	BjSA	Neutral
7928	EX_ala_B_e	GSMM_014	EX_rib__D_e	GSMM_005	EX_isocap_e	('BjSA', 'Neutral')	BjSA	Neutral
7934	EX_ala_B_e	GSMM_354	EX_rib__D_e	GSMM_005	EX_isocap_e	('BjSA', 'Neutral')	BjSA	Neutral
7936	EX_ala_B_e	GSMM_014	EX_4hbz_e	GSMM_005	EX_isocap_e	('BjSA', 'Neutral')	BjSA	Neutral
7941	EX_ala_B_e	GSMM_354	EX_4hbz_e	GSMM_005	EX_isocap_e	('BjSA', 'Neutral')	BjSA	Neutral
7942	EX_ala_B_e	GSMM_014	EX_pea_e	GSMM_005	EX_isocap_e	('BjSA', 'Neutral')	BjSA	Neutral
7944	EX_ala_B_e	GSMM_014	EX_actn__R_e	GSMM_005	EX_isocap_e	('BjSA', 'Neutral')	BjSA	Neutral
7947	EX_ala_B_e	GSMM_354	EX_actn__R_e	GSMM_005	EX_isocap_e	('BjSA', 'Neutral')	BjSA	Neutral
7948	EX_ala_B_e	GSMM_014	EX_spmd_e	GSMM_005	EX_isocap_e	('BjSA', 'Neutral')	BjSA	Neutral
7953	EX_ala_B_e	GSMM_354	EX_spmd_e	GSMM_005	EX_isocap_e	('BjSA', 'Neutral')	BjSA	Neutral
7954	EX_ala_B_e	GSMM_014	EX_glu__L_e	GSMM_005	EX_isocap_e	('BjSA', 'Neutral')	BjSA	Neutral
7959	EX_ala_B_e	GSMM_014	EX_4hbald_e	GSMM_005	EX_isocap_e	('BjSA', 'Neutral')	BjSA	Neutral
7961	EX_ala_B_e	GSMM_354	EX_4hbald_e	GSMM_005	EX_isocap_e	('BjSA', 'Neutral')	BjSA	Neutral
7963	EX_ala_B_e	GSMM_014	EX_cgly_e	GSMM_005	EX_isocap_e	('BjSA', 'Neutral')	BjSA	Neutral
7970	EX_ala_B_e	GSMM_014	EX_glyc_e	GSMM_005	EX_isocap_e	('BjSA', 'Neutral')	BjSA	Neutral
7977	EX_ala_B_e	GSMM_354	EX_glyc_e	GSMM_005	EX_isocap_e	('BjSA', 'Neutral')	BjSA	Neutral
7979	EX_ala_B_e	GSMM_014	EX_fe3pyovd_kt_e	GSMM_005	EX_isocap_e	('BjSA', 'Neutral')	BjSA	Neutral
7987	EX_ala_B_e	GSMM_354	EX_fe3pyovd_kt_e	GSMM_005	EX_isocap_e	('BjSA', 'Neutral')	BjSA	Neutral
7989	EX_ala_B_e	GSMM_014	EX_pyovd_kt_e	GSMM_005	EX_isocap_e	('BjSA', 'Neutral')	BjSA	Neutral
7997	EX_ala_B_e	GSMM_354	EX_pyovd_kt_e	GSMM_005	EX_isocap_e	('BjSA', 'Neutral')	BjSA	Neutral
7999	EX_ala_B_e	GSMM_014	EX_ser__L_e	GSMM_005	EX_isocap_e	('BjSA', 'Neutral')	BjSA	Neutral
8001	EX_ala_B_e	GSMM_354	EX_ser__L_e	GSMM_005	EX_isocap_e	('BjSA', 'Neutral')	BjSA	Neutral
8003	EX_ala_B_e	GSMM_014	EX_urea_e	GSMM_005	EX_isocap_e	('BjSA', 'Neutral')	BjSA	Neutral
8008	EX_ala_B_e	GSMM_354	EX_urea_e	GSMM_005	EX_isocap_e	('BjSA', 'Neutral')	BjSA	Neutral
8010	EX_ala_B_e	GSMM_014	EX_glc__D_e	GSMM_005	EX_isocap_e	('BjSA', 'Neutral')	BjSA	Neutral
8014	EX_ala_B_e	GSMM_354	EX_glc__D_e	GSMM_005	EX_isocap_e	('BjSA', 'Neutral')	BjSA	Neutral
8016	EX_ala_B_e	GSMM_014	EX_inost_e	GSMM_005	EX_isocap_e	('BjSA', 'Neutral')	BjSA	Neutral
8018	EX_ala_B_e	GSMM_354	EX_inost_e	GSMM_005	EX_isocap_e	('BjSA', 'Neutral')	BjSA	Neutral
8019	EX_ala_B_e	GSMM_014	EX_chol_e	GSMM_005	EX_isocap_e	('BjSA', 'Neutral')	BjSA	Neutral
8022	EX_ala_B_e	GSMM_354	EX_chol_e	GSMM_005	EX_isocap_e	('BjSA', 'Neutral')	BjSA	Neutral
8024	EX_ala_B_e	GSMM_014	EX_orn_e	GSMM_005	EX_isocap_e	('BjSA', 'Neutral')	BjSA	Neutral
8028	EX_ala_B_e	GSMM_354	EX_orn_e	GSMM_005	EX_isocap_e	('BjSA', 'Neutral')	BjSA	Neutral
8030	EX_ala_B_e	GSMM_014	EX_pheme_e	GSMM_005	EX_isocap_e	('BjSA', 'Neutral')	BjSA	Neutral
8049	EX_ala_B_e	GSMM_354	EX_4hba_e	GSMM_005	EX_isocap_e	('BjSA', 'Neutral')	BjSA	Neutral
8064	EX_ala_B_e	GSMM_354	EX_ptrc_e	GSMM_005	EX_isocap_e	('BjSA', 'Neutral')	BjSA	Neutral
8074	EX_ala_B_e	GSMM_354	EX_oxa_e	GSMM_005	EX_isocap_e	('BjSA', 'Neutral')	BjSA	Neutral
8091	EX_ala_B_e	GSMM_354	EX_glcr_e	GSMM_005	EX_isocap_e	('BjSA', 'Neutral')	BjSA	Neutral
8099	EX_ala_B_e	GSMM_354	EX_istfrnA_e	GSMM_005	EX_isocap_e	('BjSA', 'Neutral')	BjSA	Neutral
8102	EX_ala_B_e	GSMM_354	EX_stfrnA_e	GSMM_005	EX_isocap_e	('BjSA', 'Neutral')	BjSA	Neutral
8103	EX_ala_B_e	GSMM_354	EX_dha_e	GSMM_005	EX_isocap_e	('BjSA', 'Neutral')	BjSA	Neutral
8104	EX_ala_B_e	GSMM_014	EX_5drib_e	GSMM_122	EX_isocap_e	('BjSA', 'Neutral')	BjSA	Neutral
8112	EX_ala_B_e	GSMM_354	EX_5drib_e	GSMM_122	EX_isocap_e	('BjSA', 'Neutral')	BjSA	Neutral
8114	EX_ala_B_e	GSMM_014	EX_gthrd_e	GSMM_122	EX_isocap_e	('BjSA', 'Neutral')	BjSA	Neutral
8119	EX_ala_B_e	GSMM_014	EX_etoh_e	GSMM_122	EX_isocap_e	('BjSA', 'Neutral')	BjSA	Neutral
8125	EX_ala_B_e	GSMM_354	EX_etoh_e	GSMM_122	EX_isocap_e	('BjSA', 'Neutral')	BjSA	Neutral
8127	EX_ala_B_e	GSMM_014	EX_glyc3p_e	GSMM_122	EX_isocap_e	('BjSA', 'Neutral')	BjSA	Neutral
8129	EX_ala_B_e	GSMM_354	EX_glyc3p_e	GSMM_122	EX_isocap_e	('BjSA', 'Neutral')	BjSA	Neutral
8130	EX_ala_B_e	GSMM_014	EX_ch4s_e	GSMM_122	EX_isocap_e	('BjSA', 'Neutral')	BjSA	Neutral
8135	EX_ala_B_e	GSMM_354	EX_ch4s_e	GSMM_122	EX_isocap_e	('BjSA', 'Neutral')	BjSA	Neutral
8137	EX_ala_B_e	GSMM_014	EX_5mdru1p_e	GSMM_122	EX_isocap_e	('BjSA', 'Neutral')	BjSA	Neutral
8141	EX_ala_B_e	GSMM_354	EX_5mdru1p_e	GSMM_122	EX_isocap_e	('BjSA', 'Neutral')	BjSA	Neutral
8142	EX_ala_B_e	GSMM_014	EX_fald_e	GSMM_122	EX_isocap_e	('BjSA', 'Neutral')	BjSA	Neutral
8149	EX_ala_B_e	GSMM_354	EX_fald_e	GSMM_122	EX_isocap_e	('BjSA', 'Neutral')	BjSA	Neutral
8151	EX_ala_B_e	GSMM_014	EX_rib__D_e	GSMM_122	EX_isocap_e	('BjSA', 'Neutral')	BjSA	Neutral
8157	EX_ala_B_e	GSMM_354	EX_rib__D_e	GSMM_122	EX_isocap_e	('BjSA', 'Neutral')	BjSA	Neutral
8159	EX_ala_B_e	GSMM_014	EX_4hbz_e	GSMM_122	EX_isocap_e	('BjSA', 'Neutral')	BjSA	Neutral
8164	EX_ala_B_e	GSMM_354	EX_4hbz_e	GSMM_122	EX_isocap_e	('BjSA', 'Neutral')	BjSA	Neutral
8165	EX_ala_B_e	GSMM_014	EX_pea_e	GSMM_122	EX_isocap_e	('BjSA', 'Neutral')	BjSA	Neutral
8167	EX_ala_B_e	GSMM_014	EX_actn__R_e	GSMM_122	EX_isocap_e	('BjSA', 'Neutral')	BjSA	Neutral
8170	EX_ala_B_e	GSMM_354	EX_actn__R_e	GSMM_122	EX_isocap_e	('BjSA', 'Neutral')	BjSA	Neutral
8171	EX_ala_B_e	GSMM_014	EX_spmd_e	GSMM_122	EX_isocap_e	('BjSA', 'Neutral')	BjSA	Neutral
8176	EX_ala_B_e	GSMM_354	EX_spmd_e	GSMM_122	EX_isocap_e	('BjSA', 'Neutral')	BjSA	Neutral
8177	EX_ala_B_e	GSMM_014	EX_glu__L_e	GSMM_122	EX_isocap_e	('BjSA', 'Neutral')	BjSA	Neutral
8182	EX_ala_B_e	GSMM_014	EX_4hbald_e	GSMM_122	EX_isocap_e	('BjSA', 'Neutral')	BjSA	Neutral
8184	EX_ala_B_e	GSMM_354	EX_4hbald_e	GSMM_122	EX_isocap_e	('BjSA', 'Neutral')	BjSA	Neutral
8186	EX_ala_B_e	GSMM_014	EX_cgly_e	GSMM_122	EX_isocap_e	('BjSA', 'Neutral')	BjSA	Neutral
8193	EX_ala_B_e	GSMM_014	EX_glyc_e	GSMM_122	EX_isocap_e	('BjSA', 'Neutral')	BjSA	Neutral
8200	EX_ala_B_e	GSMM_354	EX_glyc_e	GSMM_122	EX_isocap_e	('BjSA', 'Neutral')	BjSA	Neutral
8202	EX_ala_B_e	GSMM_014	EX_fe3pyovd_kt_e	GSMM_122	EX_isocap_e	('BjSA', 'Neutral')	BjSA	Neutral
8210	EX_ala_B_e	GSMM_354	EX_fe3pyovd_kt_e	GSMM_122	EX_isocap_e	('BjSA', 'Neutral')	BjSA	Neutral
8212	EX_ala_B_e	GSMM_014	EX_pyovd_kt_e	GSMM_122	EX_isocap_e	('BjSA', 'Neutral')	BjSA	Neutral
8220	EX_ala_B_e	GSMM_354	EX_pyovd_kt_e	GSMM_122	EX_isocap_e	('BjSA', 'Neutral')	BjSA	Neutral
8222	EX_ala_B_e	GSMM_014	EX_ser__L_e	GSMM_122	EX_isocap_e	('BjSA', 'Neutral')	BjSA	Neutral
8224	EX_ala_B_e	GSMM_354	EX_ser__L_e	GSMM_122	EX_isocap_e	('BjSA', 'Neutral')	BjSA	Neutral
8226	EX_ala_B_e	GSMM_014	EX_ind3ac_e	GSMM_122	EX_isocap_e	('BjSA', 'Neutral')	BjSA	Neutral
8234	EX_ala_B_e	GSMM_354	EX_ind3ac_e	GSMM_122	EX_isocap_e	('BjSA', 'Neutral')	BjSA	Neutral
8236	EX_ala_B_e	GSMM_014	EX_urea_e	GSMM_122	EX_isocap_e	('BjSA', 'Neutral')	BjSA	Neutral
8241	EX_ala_B_e	GSMM_354	EX_urea_e	GSMM_122	EX_isocap_e	('BjSA', 'Neutral')	BjSA	Neutral
8243	EX_ala_B_e	GSMM_014	EX_glc__D_e	GSMM_122	EX_isocap_e	('BjSA', 'Neutral')	BjSA	Neutral
8247	EX_ala_B_e	GSMM_354	EX_glc__D_e	GSMM_122	EX_isocap_e	('BjSA', 'Neutral')	BjSA	Neutral
8249	EX_ala_B_e	GSMM_014	EX_pydxn_e	GSMM_122	EX_isocap_e	('BjSA', 'Neutral')	BjSA	Neutral
8250	EX_ala_B_e	GSMM_354	EX_pydxn_e	GSMM_122	EX_isocap_e	('BjSA', 'Neutral')	BjSA	Neutral
8251	EX_ala_B_e	GSMM_014	EX_chol_e	GSMM_122	EX_isocap_e	('BjSA', 'Neutral')	BjSA	Neutral
8254	EX_ala_B_e	GSMM_354	EX_chol_e	GSMM_122	EX_isocap_e	('BjSA', 'Neutral')	BjSA	Neutral
8256	EX_ala_B_e	GSMM_014	EX_cys__L_e	GSMM_122	EX_isocap_e	('BjSA', 'Neutral')	BjSA	Neutral
8261	EX_ala_B_e	GSMM_354	EX_cys__L_e	GSMM_122	EX_isocap_e	('BjSA', 'Neutral')	BjSA	Neutral
8262	EX_ala_B_e	GSMM_014	EX_orn_e	GSMM_122	EX_isocap_e	('BjSA', 'Neutral')	BjSA	Neutral
8266	EX_ala_B_e	GSMM_354	EX_orn_e	GSMM_122	EX_isocap_e	('BjSA', 'Neutral')	BjSA	Neutral
8268	EX_ala_B_e	GSMM_014	EX_pheme_e	GSMM_122	EX_isocap_e	('BjSA', 'Neutral')	BjSA	Neutral
8290	EX_ala_B_e	GSMM_354	EX_4hba_e	GSMM_122	EX_isocap_e	('BjSA', 'Neutral')	BjSA	Neutral
8297	EX_ala_B_e	GSMM_354	EX_gal_e	GSMM_122	EX_isocap_e	('BjSA', 'Neutral')	BjSA	Neutral
8324	EX_ala_B_e	GSMM_354	EX_ptrc_e	GSMM_122	EX_isocap_e	('BjSA', 'Neutral')	BjSA	Neutral
8334	EX_ala_B_e	GSMM_354	EX_oxa_e	GSMM_122	EX_isocap_e	('BjSA', 'Neutral')	BjSA	Neutral
8356	EX_ala_B_e	GSMM_354	EX_udcpp_e	GSMM_122	EX_isocap_e	('BjSA', 'Neutral')	BjSA	Neutral
8361	EX_ala_B_e	GSMM_354	EX_istfrnA_e	GSMM_122	EX_isocap_e	('BjSA', 'Neutral')	BjSA	Neutral
8365	EX_ala_B_e	GSMM_354	EX_stfrnA_e	GSMM_122	EX_isocap_e	('BjSA', 'Neutral')	BjSA	Neutral
8366	EX_ala_B_e	GSMM_354	EX_dha_e	GSMM_122	EX_isocap_e	('BjSA', 'Neutral')	BjSA	Neutral
8368	EX_ala_B_e	GSMM_014	EX_5drib_e	GSMM_142	EX_isocap_e	('BjSA', 'NTC')	BjSA	NTC
8376	EX_ala_B_e	GSMM_354	EX_5drib_e	GSMM_142	EX_isocap_e	('BjSA', 'NTC')	BjSA	NTC
8378	EX_ala_B_e	GSMM_014	EX_gthrd_e	GSMM_142	EX_isocap_e	('BjSA', 'NTC')	BjSA	NTC
8383	EX_ala_B_e	GSMM_014	EX_etoh_e	GSMM_142	EX_isocap_e	('BjSA', 'NTC')	BjSA	NTC
8389	EX_ala_B_e	GSMM_354	EX_etoh_e	GSMM_142	EX_isocap_e	('BjSA', 'NTC')	BjSA	NTC
8391	EX_ala_B_e	GSMM_014	EX_glyc3p_e	GSMM_142	EX_isocap_e	('BjSA', 'NTC')	BjSA	NTC
8393	EX_ala_B_e	GSMM_354	EX_glyc3p_e	GSMM_142	EX_isocap_e	('BjSA', 'NTC')	BjSA	NTC
8394	EX_ala_B_e	GSMM_014	EX_ch4s_e	GSMM_142	EX_isocap_e	('BjSA', 'NTC')	BjSA	NTC
8399	EX_ala_B_e	GSMM_354	EX_ch4s_e	GSMM_142	EX_isocap_e	('BjSA', 'NTC')	BjSA	NTC
8401	EX_ala_B_e	GSMM_014	EX_pacald_e	GSMM_142	EX_isocap_e	('BjSA', 'NTC')	BjSA	NTC
8404	EX_ala_B_e	GSMM_014	EX_fald_e	GSMM_142	EX_isocap_e	('BjSA', 'NTC')	BjSA	NTC
8411	EX_ala_B_e	GSMM_354	EX_fald_e	GSMM_142	EX_isocap_e	('BjSA', 'NTC')	BjSA	NTC
8413	EX_ala_B_e	GSMM_014	EX_rib__D_e	GSMM_142	EX_isocap_e	('BjSA', 'NTC')	BjSA	NTC
8419	EX_ala_B_e	GSMM_354	EX_rib__D_e	GSMM_142	EX_isocap_e	('BjSA', 'NTC')	BjSA	NTC
8421	EX_ala_B_e	GSMM_014	EX_4hbz_e	GSMM_142	EX_isocap_e	('BjSA', 'NTC')	BjSA	NTC
8426	EX_ala_B_e	GSMM_354	EX_4hbz_e	GSMM_142	EX_isocap_e	('BjSA', 'NTC')	BjSA	NTC
8427	EX_ala_B_e	GSMM_014	EX_pea_e	GSMM_142	EX_isocap_e	('BjSA', 'NTC')	BjSA	NTC
8429	EX_ala_B_e	GSMM_014	EX_actn__R_e	GSMM_142	EX_isocap_e	('BjSA', 'NTC')	BjSA	NTC
8432	EX_ala_B_e	GSMM_354	EX_actn__R_e	GSMM_142	EX_isocap_e	('BjSA', 'NTC')	BjSA	NTC
8433	EX_ala_B_e	GSMM_014	EX_spmd_e	GSMM_142	EX_isocap_e	('BjSA', 'NTC')	BjSA	NTC
8438	EX_ala_B_e	GSMM_354	EX_spmd_e	GSMM_142	EX_isocap_e	('BjSA', 'NTC')	BjSA	NTC
8439	EX_ala_B_e	GSMM_014	EX_glu__L_e	GSMM_142	EX_isocap_e	('BjSA', 'NTC')	BjSA	NTC
8444	EX_ala_B_e	GSMM_014	EX_4hbald_e	GSMM_142	EX_isocap_e	('BjSA', 'NTC')	BjSA	NTC
8446	EX_ala_B_e	GSMM_354	EX_4hbald_e	GSMM_142	EX_isocap_e	('BjSA', 'NTC')	BjSA	NTC
8448	EX_ala_B_e	GSMM_014	EX_cgly_e	GSMM_142	EX_isocap_e	('BjSA', 'NTC')	BjSA	NTC
8455	EX_ala_B_e	GSMM_014	EX_glyc_e	GSMM_142	EX_isocap_e	('BjSA', 'NTC')	BjSA	NTC
8462	EX_ala_B_e	GSMM_354	EX_glyc_e	GSMM_142	EX_isocap_e	('BjSA', 'NTC')	BjSA	NTC
8464	EX_ala_B_e	GSMM_014	EX_fe3pyovd_kt_e	GSMM_142	EX_isocap_e	('BjSA', 'NTC')	BjSA	NTC
8472	EX_ala_B_e	GSMM_354	EX_fe3pyovd_kt_e	GSMM_142	EX_isocap_e	('BjSA', 'NTC')	BjSA	NTC
8474	EX_ala_B_e	GSMM_014	EX_pyovd_kt_e	GSMM_142	EX_isocap_e	('BjSA', 'NTC')	BjSA	NTC
8482	EX_ala_B_e	GSMM_354	EX_pyovd_kt_e	GSMM_142	EX_isocap_e	('BjSA', 'NTC')	BjSA	NTC
8484	EX_ala_B_e	GSMM_014	EX_ser__L_e	GSMM_142	EX_isocap_e	('BjSA', 'NTC')	BjSA	NTC
8486	EX_ala_B_e	GSMM_354	EX_ser__L_e	GSMM_142	EX_isocap_e	('BjSA', 'NTC')	BjSA	NTC
8488	EX_ala_B_e	GSMM_014	EX_ind3ac_e	GSMM_142	EX_isocap_e	('BjSA', 'NTC')	BjSA	NTC
8496	EX_ala_B_e	GSMM_354	EX_ind3ac_e	GSMM_142	EX_isocap_e	('BjSA', 'NTC')	BjSA	NTC
8498	EX_ala_B_e	GSMM_014	EX_urea_e	GSMM_142	EX_isocap_e	('BjSA', 'NTC')	BjSA	NTC
8503	EX_ala_B_e	GSMM_354	EX_urea_e	GSMM_142	EX_isocap_e	('BjSA', 'NTC')	BjSA	NTC
8505	EX_ala_B_e	GSMM_014	EX_glc__D_e	GSMM_142	EX_isocap_e	('BjSA', 'NTC')	BjSA	NTC
8509	EX_ala_B_e	GSMM_354	EX_glc__D_e	GSMM_142	EX_isocap_e	('BjSA', 'NTC')	BjSA	NTC
8511	EX_ala_B_e	GSMM_014	EX_inost_e	GSMM_142	EX_isocap_e	('BjSA', 'NTC')	BjSA	NTC
8513	EX_ala_B_e	GSMM_354	EX_inost_e	GSMM_142	EX_isocap_e	('BjSA', 'NTC')	BjSA	NTC
8514	EX_ala_B_e	GSMM_014	EX_chol_e	GSMM_142	EX_isocap_e	('BjSA', 'NTC')	BjSA	NTC
8517	EX_ala_B_e	GSMM_354	EX_chol_e	GSMM_142	EX_isocap_e	('BjSA', 'NTC')	BjSA	NTC
8519	EX_ala_B_e	GSMM_014	EX_cys__L_e	GSMM_142	EX_isocap_e	('BjSA', 'NTC')	BjSA	NTC
8524	EX_ala_B_e	GSMM_354	EX_cys__L_e	GSMM_142	EX_isocap_e	('BjSA', 'NTC')	BjSA	NTC
8525	EX_ala_B_e	GSMM_014	EX_orn_e	GSMM_142	EX_isocap_e	('BjSA', 'NTC')	BjSA	NTC
8529	EX_ala_B_e	GSMM_354	EX_orn_e	GSMM_142	EX_isocap_e	('BjSA', 'NTC')	BjSA	NTC
8531	EX_ala_B_e	GSMM_014	EX_pheme_e	GSMM_142	EX_isocap_e	('BjSA', 'NTC')	BjSA	NTC
8550	EX_ala_B_e	GSMM_354	EX_4hba_e	GSMM_142	EX_isocap_e	('BjSA', 'NTC')	BjSA	NTC
8557	EX_ala_B_e	GSMM_354	EX_gal_e	GSMM_142	EX_isocap_e	('BjSA', 'NTC')	BjSA	NTC
8565	EX_ala_B_e	GSMM_354	EX_ala__D_e	GSMM_142	EX_isocap_e	('BjSA', 'NTC')	BjSA	NTC
8589	EX_ala_B_e	GSMM_354	EX_ptrc_e	GSMM_142	EX_isocap_e	('BjSA', 'NTC')	BjSA	NTC
8599	EX_ala_B_e	GSMM_354	EX_oxa_e	GSMM_142	EX_isocap_e	('BjSA', 'NTC')	BjSA	NTC
8622	EX_ala_B_e	GSMM_354	EX_istfrnA_e	GSMM_142	EX_isocap_e	('BjSA', 'NTC')	BjSA	NTC
8626	EX_ala_B_e	GSMM_354	EX_stfrnA_e	GSMM_142	EX_isocap_e	('BjSA', 'NTC')	BjSA	NTC
8627	EX_ala_B_e	GSMM_014	EX_5drib_e	GSMM_256	EX_isocap_e	('BjSA', 'NTC')	BjSA	NTC
8635	EX_ala_B_e	GSMM_354	EX_5drib_e	GSMM_256	EX_isocap_e	('BjSA', 'NTC')	BjSA	NTC
8637	EX_ala_B_e	GSMM_014	EX_gthrd_e	GSMM_256	EX_isocap_e	('BjSA', 'NTC')	BjSA	NTC
8642	EX_ala_B_e	GSMM_014	EX_etoh_e	GSMM_256	EX_isocap_e	('BjSA', 'NTC')	BjSA	NTC
8648	EX_ala_B_e	GSMM_354	EX_etoh_e	GSMM_256	EX_isocap_e	('BjSA', 'NTC')	BjSA	NTC
8650	EX_ala_B_e	GSMM_014	EX_glyc3p_e	GSMM_256	EX_isocap_e	('BjSA', 'NTC')	BjSA	NTC
8652	EX_ala_B_e	GSMM_354	EX_glyc3p_e	GSMM_256	EX_isocap_e	('BjSA', 'NTC')	BjSA	NTC
8653	EX_ala_B_e	GSMM_014	EX_fald_e	GSMM_256	EX_isocap_e	('BjSA', 'NTC')	BjSA	NTC
8660	EX_ala_B_e	GSMM_354	EX_fald_e	GSMM_256	EX_isocap_e	('BjSA', 'NTC')	BjSA	NTC
8662	EX_ala_B_e	GSMM_014	EX_rib__D_e	GSMM_256	EX_isocap_e	('BjSA', 'NTC')	BjSA	NTC
8668	EX_ala_B_e	GSMM_354	EX_rib__D_e	GSMM_256	EX_isocap_e	('BjSA', 'NTC')	BjSA	NTC
8670	EX_ala_B_e	GSMM_014	EX_4hbz_e	GSMM_256	EX_isocap_e	('BjSA', 'NTC')	BjSA	NTC
8675	EX_ala_B_e	GSMM_354	EX_4hbz_e	GSMM_256	EX_isocap_e	('BjSA', 'NTC')	BjSA	NTC
8676	EX_ala_B_e	GSMM_014	EX_pea_e	GSMM_256	EX_isocap_e	('BjSA', 'NTC')	BjSA	NTC
8678	EX_ala_B_e	GSMM_014	EX_actn__R_e	GSMM_256	EX_isocap_e	('BjSA', 'NTC')	BjSA	NTC
8681	EX_ala_B_e	GSMM_354	EX_actn__R_e	GSMM_256	EX_isocap_e	('BjSA', 'NTC')	BjSA	NTC
8682	EX_ala_B_e	GSMM_014	EX_spmd_e	GSMM_256	EX_isocap_e	('BjSA', 'NTC')	BjSA	NTC
8687	EX_ala_B_e	GSMM_354	EX_spmd_e	GSMM_256	EX_isocap_e	('BjSA', 'NTC')	BjSA	NTC
8688	EX_ala_B_e	GSMM_014	EX_glu__L_e	GSMM_256	EX_isocap_e	('BjSA', 'NTC')	BjSA	NTC
8693	EX_ala_B_e	GSMM_014	EX_4hbald_e	GSMM_256	EX_isocap_e	('BjSA', 'NTC')	BjSA	NTC
8695	EX_ala_B_e	GSMM_354	EX_4hbald_e	GSMM_256	EX_isocap_e	('BjSA', 'NTC')	BjSA	NTC
8697	EX_ala_B_e	GSMM_014	EX_cgly_e	GSMM_256	EX_isocap_e	('BjSA', 'NTC')	BjSA	NTC
8704	EX_ala_B_e	GSMM_014	EX_glyc_e	GSMM_256	EX_isocap_e	('BjSA', 'NTC')	BjSA	NTC
8711	EX_ala_B_e	GSMM_354	EX_glyc_e	GSMM_256	EX_isocap_e	('BjSA', 'NTC')	BjSA	NTC
8713	EX_ala_B_e	GSMM_014	EX_fe3pyovd_kt_e	GSMM_256	EX_isocap_e	('BjSA', 'NTC')	BjSA	NTC
8721	EX_ala_B_e	GSMM_354	EX_fe3pyovd_kt_e	GSMM_256	EX_isocap_e	('BjSA', 'NTC')	BjSA	NTC
8723	EX_ala_B_e	GSMM_014	EX_pyovd_kt_e	GSMM_256	EX_isocap_e	('BjSA', 'NTC')	BjSA	NTC
8731	EX_ala_B_e	GSMM_354	EX_pyovd_kt_e	GSMM_256	EX_isocap_e	('BjSA', 'NTC')	BjSA	NTC
8733	EX_ala_B_e	GSMM_014	EX_ser__L_e	GSMM_256	EX_isocap_e	('BjSA', 'NTC')	BjSA	NTC
8735	EX_ala_B_e	GSMM_354	EX_ser__L_e	GSMM_256	EX_isocap_e	('BjSA', 'NTC')	BjSA	NTC
8737	EX_ala_B_e	GSMM_014	EX_urea_e	GSMM_256	EX_isocap_e	('BjSA', 'NTC')	BjSA	NTC
8742	EX_ala_B_e	GSMM_354	EX_urea_e	GSMM_256	EX_isocap_e	('BjSA', 'NTC')	BjSA	NTC
8744	EX_ala_B_e	GSMM_014	EX_glc__D_e	GSMM_256	EX_isocap_e	('BjSA', 'NTC')	BjSA	NTC
8748	EX_ala_B_e	GSMM_354	EX_glc__D_e	GSMM_256	EX_isocap_e	('BjSA', 'NTC')	BjSA	NTC
8750	EX_ala_B_e	GSMM_014	EX_inost_e	GSMM_256	EX_isocap_e	('BjSA', 'NTC')	BjSA	NTC
8752	EX_ala_B_e	GSMM_354	EX_inost_e	GSMM_256	EX_isocap_e	('BjSA', 'NTC')	BjSA	NTC
8753	EX_ala_B_e	GSMM_014	EX_chol_e	GSMM_256	EX_isocap_e	('BjSA', 'NTC')	BjSA	NTC
8756	EX_ala_B_e	GSMM_354	EX_chol_e	GSMM_256	EX_isocap_e	('BjSA', 'NTC')	BjSA	NTC
8758	EX_ala_B_e	GSMM_014	EX_cys__L_e	GSMM_256	EX_isocap_e	('BjSA', 'NTC')	BjSA	NTC
8763	EX_ala_B_e	GSMM_354	EX_cys__L_e	GSMM_256	EX_isocap_e	('BjSA', 'NTC')	BjSA	NTC
8764	EX_ala_B_e	GSMM_014	EX_orn_e	GSMM_256	EX_isocap_e	('BjSA', 'NTC')	BjSA	NTC
8768	EX_ala_B_e	GSMM_354	EX_orn_e	GSMM_256	EX_isocap_e	('BjSA', 'NTC')	BjSA	NTC
8770	EX_ala_B_e	GSMM_014	EX_pheme_e	GSMM_256	EX_isocap_e	('BjSA', 'NTC')	BjSA	NTC
8792	EX_ala_B_e	GSMM_354	EX_4hba_e	GSMM_256	EX_isocap_e	('BjSA', 'NTC')	BjSA	NTC
8799	EX_ala_B_e	GSMM_354	EX_gal_e	GSMM_256	EX_isocap_e	('BjSA', 'NTC')	BjSA	NTC
8807	EX_ala_B_e	GSMM_354	EX_ala__D_e	GSMM_256	EX_isocap_e	('BjSA', 'NTC')	BjSA	NTC
8825	EX_ala_B_e	GSMM_354	EX_ptrc_e	GSMM_256	EX_isocap_e	('BjSA', 'NTC')	BjSA	NTC
8835	EX_ala_B_e	GSMM_354	EX_oxa_e	GSMM_256	EX_isocap_e	('BjSA', 'NTC')	BjSA	NTC
8854	EX_ala_B_e	GSMM_354	EX_glcr_e	GSMM_256	EX_isocap_e	('BjSA', 'NTC')	BjSA	NTC
8867	EX_ala_B_e	GSMM_354	EX_istfrnA_e	GSMM_256	EX_isocap_e	('BjSA', 'NTC')	BjSA	NTC
8870	EX_ala_B_e	GSMM_354	EX_stfrnA_e	GSMM_256	EX_isocap_e	('BjSA', 'NTC')	BjSA	NTC
8872	EX_ala_B_e	GSMM_014	EX_5drib_e	GSMM_122	EX_mal__L_e	('BjSA', 'Neutral')	BjSA	Neutral
8880	EX_ala_B_e	GSMM_354	EX_5drib_e	GSMM_122	EX_mal__L_e	('BjSA', 'Neutral')	BjSA	Neutral
8882	EX_ala_B_e	GSMM_014	EX_gthrd_e	GSMM_122	EX_mal__L_e	('BjSA', 'Neutral')	BjSA	Neutral
8887	EX_ala_B_e	GSMM_014	EX_etoh_e	GSMM_122	EX_mal__L_e	('BjSA', 'Neutral')	BjSA	Neutral
8893	EX_ala_B_e	GSMM_354	EX_etoh_e	GSMM_122	EX_mal__L_e	('BjSA', 'Neutral')	BjSA	Neutral
8895	EX_ala_B_e	GSMM_014	EX_glyc3p_e	GSMM_122	EX_mal__L_e	('BjSA', 'Neutral')	BjSA	Neutral
8897	EX_ala_B_e	GSMM_354	EX_glyc3p_e	GSMM_122	EX_mal__L_e	('BjSA', 'Neutral')	BjSA	Neutral
8898	EX_ala_B_e	GSMM_014	EX_ch4s_e	GSMM_122	EX_mal__L_e	('BjSA', 'Neutral')	BjSA	Neutral
8903	EX_ala_B_e	GSMM_354	EX_ch4s_e	GSMM_122	EX_mal__L_e	('BjSA', 'Neutral')	BjSA	Neutral
8905	EX_ala_B_e	GSMM_014	EX_5mdru1p_e	GSMM_122	EX_mal__L_e	('BjSA', 'Neutral')	BjSA	Neutral
8909	EX_ala_B_e	GSMM_354	EX_5mdru1p_e	GSMM_122	EX_mal__L_e	('BjSA', 'Neutral')	BjSA	Neutral
8910	EX_ala_B_e	GSMM_014	EX_fald_e	GSMM_122	EX_mal__L_e	('BjSA', 'Neutral')	BjSA	Neutral
8917	EX_ala_B_e	GSMM_354	EX_fald_e	GSMM_122	EX_mal__L_e	('BjSA', 'Neutral')	BjSA	Neutral
8919	EX_ala_B_e	GSMM_014	EX_rib__D_e	GSMM_122	EX_mal__L_e	('BjSA', 'Neutral')	BjSA	Neutral
8925	EX_ala_B_e	GSMM_354	EX_rib__D_e	GSMM_122	EX_mal__L_e	('BjSA', 'Neutral')	BjSA	Neutral
8927	EX_ala_B_e	GSMM_014	EX_4hbz_e	GSMM_122	EX_mal__L_e	('BjSA', 'Neutral')	BjSA	Neutral
8932	EX_ala_B_e	GSMM_354	EX_4hbz_e	GSMM_122	EX_mal__L_e	('BjSA', 'Neutral')	BjSA	Neutral
8933	EX_ala_B_e	GSMM_014	EX_pea_e	GSMM_122	EX_mal__L_e	('BjSA', 'Neutral')	BjSA	Neutral
8935	EX_ala_B_e	GSMM_014	EX_actn__R_e	GSMM_122	EX_mal__L_e	('BjSA', 'Neutral')	BjSA	Neutral
8938	EX_ala_B_e	GSMM_354	EX_actn__R_e	GSMM_122	EX_mal__L_e	('BjSA', 'Neutral')	BjSA	Neutral
8939	EX_ala_B_e	GSMM_014	EX_spmd_e	GSMM_122	EX_mal__L_e	('BjSA', 'Neutral')	BjSA	Neutral
8944	EX_ala_B_e	GSMM_354	EX_spmd_e	GSMM_122	EX_mal__L_e	('BjSA', 'Neutral')	BjSA	Neutral
8945	EX_ala_B_e	GSMM_014	EX_glu__L_e	GSMM_122	EX_mal__L_e	('BjSA', 'Neutral')	BjSA	Neutral
8950	EX_ala_B_e	GSMM_014	EX_4hbald_e	GSMM_122	EX_mal__L_e	('BjSA', 'Neutral')	BjSA	Neutral
8952	EX_ala_B_e	GSMM_354	EX_4hbald_e	GSMM_122	EX_mal__L_e	('BjSA', 'Neutral')	BjSA	Neutral
8954	EX_ala_B_e	GSMM_014	EX_cgly_e	GSMM_122	EX_mal__L_e	('BjSA', 'Neutral')	BjSA	Neutral
8961	EX_ala_B_e	GSMM_014	EX_glyc_e	GSMM_122	EX_mal__L_e	('BjSA', 'Neutral')	BjSA	Neutral
8968	EX_ala_B_e	GSMM_354	EX_glyc_e	GSMM_122	EX_mal__L_e	('BjSA', 'Neutral')	BjSA	Neutral
8970	EX_ala_B_e	GSMM_014	EX_fe3pyovd_kt_e	GSMM_122	EX_mal__L_e	('BjSA', 'Neutral')	BjSA	Neutral
8978	EX_ala_B_e	GSMM_354	EX_fe3pyovd_kt_e	GSMM_122	EX_mal__L_e	('BjSA', 'Neutral')	BjSA	Neutral
8980	EX_ala_B_e	GSMM_014	EX_pyovd_kt_e	GSMM_122	EX_mal__L_e	('BjSA', 'Neutral')	BjSA	Neutral
8988	EX_ala_B_e	GSMM_354	EX_pyovd_kt_e	GSMM_122	EX_mal__L_e	('BjSA', 'Neutral')	BjSA	Neutral
8990	EX_ala_B_e	GSMM_014	EX_ser__L_e	GSMM_122	EX_mal__L_e	('BjSA', 'Neutral')	BjSA	Neutral
8992	EX_ala_B_e	GSMM_354	EX_ser__L_e	GSMM_122	EX_mal__L_e	('BjSA', 'Neutral')	BjSA	Neutral
8994	EX_ala_B_e	GSMM_014	EX_ind3ac_e	GSMM_122	EX_mal__L_e	('BjSA', 'Neutral')	BjSA	Neutral
9002	EX_ala_B_e	GSMM_354	EX_ind3ac_e	GSMM_122	EX_mal__L_e	('BjSA', 'Neutral')	BjSA	Neutral
9004	EX_ala_B_e	GSMM_014	EX_urea_e	GSMM_122	EX_mal__L_e	('BjSA', 'Neutral')	BjSA	Neutral
9009	EX_ala_B_e	GSMM_354	EX_urea_e	GSMM_122	EX_mal__L_e	('BjSA', 'Neutral')	BjSA	Neutral
9011	EX_ala_B_e	GSMM_014	EX_glc__D_e	GSMM_122	EX_mal__L_e	('BjSA', 'Neutral')	BjSA	Neutral
9015	EX_ala_B_e	GSMM_354	EX_glc__D_e	GSMM_122	EX_mal__L_e	('BjSA', 'Neutral')	BjSA	Neutral
9017	EX_ala_B_e	GSMM_014	EX_pydxn_e	GSMM_122	EX_mal__L_e	('BjSA', 'Neutral')	BjSA	Neutral
9018	EX_ala_B_e	GSMM_354	EX_pydxn_e	GSMM_122	EX_mal__L_e	('BjSA', 'Neutral')	BjSA	Neutral
9019	EX_ala_B_e	GSMM_014	EX_chol_e	GSMM_122	EX_mal__L_e	('BjSA', 'Neutral')	BjSA	Neutral
9022	EX_ala_B_e	GSMM_354	EX_chol_e	GSMM_122	EX_mal__L_e	('BjSA', 'Neutral')	BjSA	Neutral
9024	EX_ala_B_e	GSMM_014	EX_cys__L_e	GSMM_122	EX_mal__L_e	('BjSA', 'Neutral')	BjSA	Neutral
9029	EX_ala_B_e	GSMM_354	EX_cys__L_e	GSMM_122	EX_mal__L_e	('BjSA', 'Neutral')	BjSA	Neutral
9030	EX_ala_B_e	GSMM_014	EX_orn_e	GSMM_122	EX_mal__L_e	('BjSA', 'Neutral')	BjSA	Neutral
9034	EX_ala_B_e	GSMM_354	EX_orn_e	GSMM_122	EX_mal__L_e	('BjSA', 'Neutral')	BjSA	Neutral
9036	EX_ala_B_e	GSMM_014	EX_pheme_e	GSMM_122	EX_mal__L_e	('BjSA', 'Neutral')	BjSA	Neutral
9058	EX_ala_B_e	GSMM_354	EX_4hba_e	GSMM_122	EX_mal__L_e	('BjSA', 'Neutral')	BjSA	Neutral
9065	EX_ala_B_e	GSMM_354	EX_gal_e	GSMM_122	EX_mal__L_e	('BjSA', 'Neutral')	BjSA	Neutral
9092	EX_ala_B_e	GSMM_354	EX_ptrc_e	GSMM_122	EX_mal__L_e	('BjSA', 'Neutral')	BjSA	Neutral
9102	EX_ala_B_e	GSMM_354	EX_oxa_e	GSMM_122	EX_mal__L_e	('BjSA', 'Neutral')	BjSA	Neutral
9124	EX_ala_B_e	GSMM_354	EX_udcpp_e	GSMM_122	EX_mal__L_e	('BjSA', 'Neutral')	BjSA	Neutral
9129	EX_ala_B_e	GSMM_354	EX_istfrnA_e	GSMM_122	EX_mal__L_e	('BjSA', 'Neutral')	BjSA	Neutral
9133	EX_ala_B_e	GSMM_354	EX_stfrnA_e	GSMM_122	EX_mal__L_e	('BjSA', 'Neutral')	BjSA	Neutral
9134	EX_ala_B_e	GSMM_354	EX_dha_e	GSMM_122	EX_mal__L_e	('BjSA', 'Neutral')	BjSA	Neutral
9136	EX_ala_B_e	GSMM_014	EX_5drib_e	GSMM_160	EX_mal__L_e	('BjSA', 'Neutral')	BjSA	Neutral
9144	EX_ala_B_e	GSMM_354	EX_5drib_e	GSMM_160	EX_mal__L_e	('BjSA', 'Neutral')	BjSA	Neutral
9146	EX_ala_B_e	GSMM_014	EX_gthrd_e	GSMM_160	EX_mal__L_e	('BjSA', 'Neutral')	BjSA	Neutral
9151	EX_ala_B_e	GSMM_014	EX_etoh_e	GSMM_160	EX_mal__L_e	('BjSA', 'Neutral')	BjSA	Neutral
9157	EX_ala_B_e	GSMM_354	EX_etoh_e	GSMM_160	EX_mal__L_e	('BjSA', 'Neutral')	BjSA	Neutral
9159	EX_ala_B_e	GSMM_014	EX_glyc3p_e	GSMM_160	EX_mal__L_e	('BjSA', 'Neutral')	BjSA	Neutral
9161	EX_ala_B_e	GSMM_354	EX_glyc3p_e	GSMM_160	EX_mal__L_e	('BjSA', 'Neutral')	BjSA	Neutral
9162	EX_ala_B_e	GSMM_014	EX_ch4s_e	GSMM_160	EX_mal__L_e	('BjSA', 'Neutral')	BjSA	Neutral
9167	EX_ala_B_e	GSMM_354	EX_ch4s_e	GSMM_160	EX_mal__L_e	('BjSA', 'Neutral')	BjSA	Neutral
9169	EX_ala_B_e	GSMM_014	EX_pacald_e	GSMM_160	EX_mal__L_e	('BjSA', 'Neutral')	BjSA	Neutral
9172	EX_ala_B_e	GSMM_014	EX_fald_e	GSMM_160	EX_mal__L_e	('BjSA', 'Neutral')	BjSA	Neutral
9179	EX_ala_B_e	GSMM_354	EX_fald_e	GSMM_160	EX_mal__L_e	('BjSA', 'Neutral')	BjSA	Neutral
9181	EX_ala_B_e	GSMM_014	EX_rib__D_e	GSMM_160	EX_mal__L_e	('BjSA', 'Neutral')	BjSA	Neutral
9187	EX_ala_B_e	GSMM_354	EX_rib__D_e	GSMM_160	EX_mal__L_e	('BjSA', 'Neutral')	BjSA	Neutral
9189	EX_ala_B_e	GSMM_014	EX_4hbz_e	GSMM_160	EX_mal__L_e	('BjSA', 'Neutral')	BjSA	Neutral
9194	EX_ala_B_e	GSMM_354	EX_4hbz_e	GSMM_160	EX_mal__L_e	('BjSA', 'Neutral')	BjSA	Neutral
9195	EX_ala_B_e	GSMM_014	EX_actn__R_e	GSMM_160	EX_mal__L_e	('BjSA', 'Neutral')	BjSA	Neutral
9198	EX_ala_B_e	GSMM_354	EX_actn__R_e	GSMM_160	EX_mal__L_e	('BjSA', 'Neutral')	BjSA	Neutral
9199	EX_ala_B_e	GSMM_014	EX_spmd_e	GSMM_160	EX_mal__L_e	('BjSA', 'Neutral')	BjSA	Neutral
9204	EX_ala_B_e	GSMM_354	EX_spmd_e	GSMM_160	EX_mal__L_e	('BjSA', 'Neutral')	BjSA	Neutral
9205	EX_ala_B_e	GSMM_014	EX_4hbald_e	GSMM_160	EX_mal__L_e	('BjSA', 'Neutral')	BjSA	Neutral
9207	EX_ala_B_e	GSMM_354	EX_4hbald_e	GSMM_160	EX_mal__L_e	('BjSA', 'Neutral')	BjSA	Neutral
9209	EX_ala_B_e	GSMM_014	EX_cgly_e	GSMM_160	EX_mal__L_e	('BjSA', 'Neutral')	BjSA	Neutral
9216	EX_ala_B_e	GSMM_014	EX_glyc_e	GSMM_160	EX_mal__L_e	('BjSA', 'Neutral')	BjSA	Neutral
9223	EX_ala_B_e	GSMM_354	EX_glyc_e	GSMM_160	EX_mal__L_e	('BjSA', 'Neutral')	BjSA	Neutral
9225	EX_ala_B_e	GSMM_014	EX_fe3pyovd_kt_e	GSMM_160	EX_mal__L_e	('BjSA', 'Neutral')	BjSA	Neutral
9233	EX_ala_B_e	GSMM_354	EX_fe3pyovd_kt_e	GSMM_160	EX_mal__L_e	('BjSA', 'Neutral')	BjSA	Neutral
9235	EX_ala_B_e	GSMM_014	EX_pyovd_kt_e	GSMM_160	EX_mal__L_e	('BjSA', 'Neutral')	BjSA	Neutral
9243	EX_ala_B_e	GSMM_354	EX_pyovd_kt_e	GSMM_160	EX_mal__L_e	('BjSA', 'Neutral')	BjSA	Neutral
9245	EX_ala_B_e	GSMM_014	EX_urea_e	GSMM_160	EX_mal__L_e	('BjSA', 'Neutral')	BjSA	Neutral
9250	EX_ala_B_e	GSMM_354	EX_urea_e	GSMM_160	EX_mal__L_e	('BjSA', 'Neutral')	BjSA	Neutral
9252	EX_ala_B_e	GSMM_014	EX_glc__D_e	GSMM_160	EX_mal__L_e	('BjSA', 'Neutral')	BjSA	Neutral
9256	EX_ala_B_e	GSMM_354	EX_glc__D_e	GSMM_160	EX_mal__L_e	('BjSA', 'Neutral')	BjSA	Neutral
9258	EX_ala_B_e	GSMM_014	EX_inost_e	GSMM_160	EX_mal__L_e	('BjSA', 'Neutral')	BjSA	Neutral
9260	EX_ala_B_e	GSMM_354	EX_inost_e	GSMM_160	EX_mal__L_e	('BjSA', 'Neutral')	BjSA	Neutral
9261	EX_ala_B_e	GSMM_014	EX_chol_e	GSMM_160	EX_mal__L_e	('BjSA', 'Neutral')	BjSA	Neutral
9264	EX_ala_B_e	GSMM_354	EX_chol_e	GSMM_160	EX_mal__L_e	('BjSA', 'Neutral')	BjSA	Neutral
9266	EX_ala_B_e	GSMM_014	EX_pheme_e	GSMM_160	EX_mal__L_e	('BjSA', 'Neutral')	BjSA	Neutral
9290	EX_ala_B_e	GSMM_354	EX_4hba_e	GSMM_160	EX_mal__L_e	('BjSA', 'Neutral')	BjSA	Neutral
9297	EX_ala_B_e	GSMM_354	EX_gal_e	GSMM_160	EX_mal__L_e	('BjSA', 'Neutral')	BjSA	Neutral
9318	EX_ala_B_e	GSMM_354	EX_ptrc_e	GSMM_160	EX_mal__L_e	('BjSA', 'Neutral')	BjSA	Neutral
9328	EX_ala_B_e	GSMM_354	EX_oxa_e	GSMM_160	EX_mal__L_e	('BjSA', 'Neutral')	BjSA	Neutral
9353	EX_ala_B_e	GSMM_014	EX_5drib_e	GSMM_380	EX_mal__L_e	('BjSA', 'Neutral')	BjSA	Neutral
9361	EX_ala_B_e	GSMM_354	EX_5drib_e	GSMM_380	EX_mal__L_e	('BjSA', 'Neutral')	BjSA	Neutral
9363	EX_ala_B_e	GSMM_014	EX_gthrd_e	GSMM_380	EX_mal__L_e	('BjSA', 'Neutral')	BjSA	Neutral
9368	EX_ala_B_e	GSMM_014	EX_rib__D_e	GSMM_380	EX_mal__L_e	('BjSA', 'Neutral')	BjSA	Neutral
9374	EX_ala_B_e	GSMM_354	EX_rib__D_e	GSMM_380	EX_mal__L_e	('BjSA', 'Neutral')	BjSA	Neutral
9376	EX_ala_B_e	GSMM_014	EX_pea_e	GSMM_380	EX_mal__L_e	('BjSA', 'Neutral')	BjSA	Neutral
9378	EX_ala_B_e	GSMM_014	EX_actn__R_e	GSMM_380	EX_mal__L_e	('BjSA', 'Neutral')	BjSA	Neutral
9381	EX_ala_B_e	GSMM_354	EX_actn__R_e	GSMM_380	EX_mal__L_e	('BjSA', 'Neutral')	BjSA	Neutral
9382	EX_ala_B_e	GSMM_014	EX_glu__L_e	GSMM_380	EX_mal__L_e	('BjSA', 'Neutral')	BjSA	Neutral
9387	EX_ala_B_e	GSMM_014	EX_cgly_e	GSMM_380	EX_mal__L_e	('BjSA', 'Neutral')	BjSA	Neutral
9394	EX_ala_B_e	GSMM_014	EX_glyc_e	GSMM_380	EX_mal__L_e	('BjSA', 'Neutral')	BjSA	Neutral
9401	EX_ala_B_e	GSMM_354	EX_glyc_e	GSMM_380	EX_mal__L_e	('BjSA', 'Neutral')	BjSA	Neutral
9403	EX_ala_B_e	GSMM_014	EX_fe3pyovd_kt_e	GSMM_380	EX_mal__L_e	('BjSA', 'Neutral')	BjSA	Neutral
9411	EX_ala_B_e	GSMM_354	EX_fe3pyovd_kt_e	GSMM_380	EX_mal__L_e	('BjSA', 'Neutral')	BjSA	Neutral
9413	EX_ala_B_e	GSMM_014	EX_pyovd_kt_e	GSMM_380	EX_mal__L_e	('BjSA', 'Neutral')	BjSA	Neutral
9421	EX_ala_B_e	GSMM_354	EX_pyovd_kt_e	GSMM_380	EX_mal__L_e	('BjSA', 'Neutral')	BjSA	Neutral
9423	EX_ala_B_e	GSMM_014	EX_ser__L_e	GSMM_380	EX_mal__L_e	('BjSA', 'Neutral')	BjSA	Neutral
9425	EX_ala_B_e	GSMM_354	EX_ser__L_e	GSMM_380	EX_mal__L_e	('BjSA', 'Neutral')	BjSA	Neutral
9427	EX_ala_B_e	GSMM_014	EX_urea_e	GSMM_380	EX_mal__L_e	('BjSA', 'Neutral')	BjSA	Neutral
9432	EX_ala_B_e	GSMM_354	EX_urea_e	GSMM_380	EX_mal__L_e	('BjSA', 'Neutral')	BjSA	Neutral
9434	EX_ala_B_e	GSMM_014	EX_glc__D_e	GSMM_380	EX_mal__L_e	('BjSA', 'Neutral')	BjSA	Neutral
9438	EX_ala_B_e	GSMM_354	EX_glc__D_e	GSMM_380	EX_mal__L_e	('BjSA', 'Neutral')	BjSA	Neutral
9440	EX_ala_B_e	GSMM_014	EX_inost_e	GSMM_380	EX_mal__L_e	('BjSA', 'Neutral')	BjSA	Neutral
9442	EX_ala_B_e	GSMM_354	EX_inost_e	GSMM_380	EX_mal__L_e	('BjSA', 'Neutral')	BjSA	Neutral
9443	EX_ala_B_e	GSMM_014	EX_chol_e	GSMM_380	EX_mal__L_e	('BjSA', 'Neutral')	BjSA	Neutral
9446	EX_ala_B_e	GSMM_354	EX_chol_e	GSMM_380	EX_mal__L_e	('BjSA', 'Neutral')	BjSA	Neutral
9448	EX_ala_B_e	GSMM_014	EX_cys__L_e	GSMM_380	EX_mal__L_e	('BjSA', 'Neutral')	BjSA	Neutral
[truncated: 49,106 more rows]

## Sheet: PMM_position_1_symptomized
	exudate	GSMM1	metabolite1	GSMM2	metabolite2	class	class1	class2
5	EX_4hbz_e	GSMM_024	EX_acald_e	GSMM_103	EX_diact_e	('NTC', 'Neutral')	NTC	Neutral
14	EX_4hbz_e	GSMM_057	EX_acald_e	GSMM_103	EX_diact_e	('NTC', 'Neutral')	NTC	Neutral
19	EX_4hbz_e	GSMM_093	EX_acald_e	GSMM_103	EX_diact_e	('NTC', 'Neutral')	NTC	Neutral
21	EX_4hbz_e	GSMM_104	EX_acald_e	GSMM_103	EX_diact_e	('NTC', 'Neutral')	NTC	Neutral
27	EX_4hbz_e	GSMM_142	EX_acald_e	GSMM_103	EX_diact_e	('NTC', 'Neutral')	NTC	Neutral
32	EX_4hbz_e	GSMM_161	EX_acald_e	GSMM_103	EX_diact_e	('NTC', 'Neutral')	NTC	Neutral
38	EX_4hbz_e	GSMM_220	EX_acald_e	GSMM_103	EX_diact_e	('NTC', 'Neutral')	NTC	Neutral
39	EX_4hbz_e	GSMM_225	EX_acald_e	GSMM_103	EX_diact_e	('NTC', 'Neutral')	NTC	Neutral
41	EX_4hbz_e	GSMM_232	EX_acald_e	GSMM_103	EX_diact_e	('NTC', 'Neutral')	NTC	Neutral
43	EX_4hbz_e	GSMM_256	EX_acald_e	GSMM_103	EX_diact_e	('NTC', 'Neutral')	NTC	Neutral
44	EX_4hbz_e	GSMM_261	EX_acald_e	GSMM_103	EX_diact_e	('NTC', 'Neutral')	NTC	Neutral
45	EX_4hbz_e	GSMM_262	EX_acald_e	GSMM_103	EX_diact_e	('NTC', 'Neutral')	NTC	Neutral
46	EX_4hbz_e	GSMM_265	EX_acald_e	GSMM_103	EX_diact_e	('NTC', 'Neutral')	NTC	Neutral
49	EX_4hbz_e	GSMM_306	EX_acald_e	GSMM_103	EX_diact_e	('NTC', 'Neutral')	NTC	Neutral
57	EX_4hbz_e	GSMM_365	EX_acald_e	GSMM_103	EX_diact_e	('NTC', 'Neutral')	NTC	Neutral
58	EX_4hbz_e	GSMM_374	EX_acald_e	GSMM_103	EX_diact_e	('NTC', 'Neutral')	NTC	Neutral
65	EX_4hbz_e	GSMM_024	EX_5drib_e	GSMM_103	EX_diact_e	('NTC', 'Neutral')	NTC	Neutral
72	EX_4hbz_e	GSMM_057	EX_5drib_e	GSMM_103	EX_diact_e	('NTC', 'Neutral')	NTC	Neutral
77	EX_4hbz_e	GSMM_093	EX_5drib_e	GSMM_103	EX_diact_e	('NTC', 'Neutral')	NTC	Neutral
79	EX_4hbz_e	GSMM_104	EX_5drib_e	GSMM_103	EX_diact_e	('NTC', 'Neutral')	NTC	Neutral
85	EX_4hbz_e	GSMM_142	EX_5drib_e	GSMM_103	EX_diact_e	('NTC', 'Neutral')	NTC	Neutral
94	EX_4hbz_e	GSMM_220	EX_5drib_e	GSMM_103	EX_diact_e	('NTC', 'Neutral')	NTC	Neutral
95	EX_4hbz_e	GSMM_225	EX_5drib_e	GSMM_103	EX_diact_e	('NTC', 'Neutral')	NTC	Neutral
97	EX_4hbz_e	GSMM_232	EX_5drib_e	GSMM_103	EX_diact_e	('NTC', 'Neutral')	NTC	Neutral
99	EX_4hbz_e	GSMM_256	EX_5drib_e	GSMM_103	EX_diact_e	('NTC', 'Neutral')	NTC	Neutral
100	EX_4hbz_e	GSMM_261	EX_5drib_e	GSMM_103	EX_diact_e	('NTC', 'Neutral')	NTC	Neutral
101	EX_4hbz_e	GSMM_262	EX_5drib_e	GSMM_103	EX_diact_e	('NTC', 'Neutral')	NTC	Neutral
102	EX_4hbz_e	GSMM_265	EX_5drib_e	GSMM_103	EX_diact_e	('NTC', 'Neutral')	NTC	Neutral
105	EX_4hbz_e	GSMM_306	EX_5drib_e	GSMM_103	EX_diact_e	('NTC', 'Neutral')	NTC	Neutral
116	EX_4hbz_e	GSMM_365	EX_5drib_e	GSMM_103	EX_diact_e	('NTC', 'Neutral')	NTC	Neutral
117	EX_4hbz_e	GSMM_374	EX_5drib_e	GSMM_103	EX_diact_e	('NTC', 'Neutral')	NTC	Neutral
129	EX_4hbz_e	GSMM_104	EX_for_e	GSMM_103	EX_diact_e	('NTC', 'Neutral')	NTC	Neutral
135	EX_4hbz_e	GSMM_232	EX_for_e	GSMM_103	EX_diact_e	('NTC', 'Neutral')	NTC	Neutral
136	EX_4hbz_e	GSMM_256	EX_for_e	GSMM_103	EX_diact_e	('NTC', 'Neutral')	NTC	Neutral
137	EX_4hbz_e	GSMM_262	EX_for_e	GSMM_103	EX_diact_e	('NTC', 'Neutral')	NTC	Neutral
141	EX_4hbz_e	GSMM_365	EX_for_e	GSMM_103	EX_diact_e	('NTC', 'Neutral')	NTC	Neutral
142	EX_4hbz_e	GSMM_374	EX_for_e	GSMM_103	EX_diact_e	('NTC', 'Neutral')	NTC	Neutral
150	EX_4hbz_e	GSMM_024	EX_etoh_e	GSMM_103	EX_diact_e	('NTC', 'Neutral')	NTC	Neutral
159	EX_4hbz_e	GSMM_057	EX_etoh_e	GSMM_103	EX_diact_e	('NTC', 'Neutral')	NTC	Neutral
162	EX_4hbz_e	GSMM_093	EX_etoh_e	GSMM_103	EX_diact_e	('NTC', 'Neutral')	NTC	Neutral
164	EX_4hbz_e	GSMM_104	EX_etoh_e	GSMM_103	EX_diact_e	('NTC', 'Neutral')	NTC	Neutral
170	EX_4hbz_e	GSMM_142	EX_etoh_e	GSMM_103	EX_diact_e	('NTC', 'Neutral')	NTC	Neutral
173	EX_4hbz_e	GSMM_161	EX_etoh_e	GSMM_103	EX_diact_e	('NTC', 'Neutral')	NTC	Neutral
179	EX_4hbz_e	GSMM_220	EX_etoh_e	GSMM_103	EX_diact_e	('NTC', 'Neutral')	NTC	Neutral
180	EX_4hbz_e	GSMM_225	EX_etoh_e	GSMM_103	EX_diact_e	('NTC', 'Neutral')	NTC	Neutral
182	EX_4hbz_e	GSMM_232	EX_etoh_e	GSMM_103	EX_diact_e	('NTC', 'Neutral')	NTC	Neutral
184	EX_4hbz_e	GSMM_256	EX_etoh_e	GSMM_103	EX_diact_e	('NTC', 'Neutral')	NTC	Neutral
185	EX_4hbz_e	GSMM_261	EX_etoh_e	GSMM_103	EX_diact_e	('NTC', 'Neutral')	NTC	Neutral
186	EX_4hbz_e	GSMM_262	EX_etoh_e	GSMM_103	EX_diact_e	('NTC', 'Neutral')	NTC	Neutral
187	EX_4hbz_e	GSMM_265	EX_etoh_e	GSMM_103	EX_diact_e	('NTC', 'Neutral')	NTC	Neutral
189	EX_4hbz_e	GSMM_280	EX_etoh_e	GSMM_103	EX_diact_e	('NTC', 'Neutral')	NTC	Neutral
200	EX_4hbz_e	GSMM_365	EX_etoh_e	GSMM_103	EX_diact_e	('NTC', 'Neutral')	NTC	Neutral
201	EX_4hbz_e	GSMM_374	EX_etoh_e	GSMM_103	EX_diact_e	('NTC', 'Neutral')	NTC	Neutral
212	EX_4hbz_e	GSMM_104	EX_glyc3p_e	GSMM_103	EX_diact_e	('NTC', 'Neutral')	NTC	Neutral
216	EX_4hbz_e	GSMM_142	EX_glyc3p_e	GSMM_103	EX_diact_e	('NTC', 'Neutral')	NTC	Neutral
222	EX_4hbz_e	GSMM_220	EX_glyc3p_e	GSMM_103	EX_diact_e	('NTC', 'Neutral')	NTC	Neutral
223	EX_4hbz_e	GSMM_225	EX_glyc3p_e	GSMM_103	EX_diact_e	('NTC', 'Neutral')	NTC	Neutral
225	EX_4hbz_e	GSMM_256	EX_glyc3p_e	GSMM_103	EX_diact_e	('NTC', 'Neutral')	NTC	Neutral
226	EX_4hbz_e	GSMM_261	EX_glyc3p_e	GSMM_103	EX_diact_e	('NTC', 'Neutral')	NTC	Neutral
227	EX_4hbz_e	GSMM_262	EX_glyc3p_e	GSMM_103	EX_diact_e	('NTC', 'Neutral')	NTC	Neutral
228	EX_4hbz_e	GSMM_265	EX_glyc3p_e	GSMM_103	EX_diact_e	('NTC', 'Neutral')	NTC	Neutral
230	EX_4hbz_e	GSMM_280	EX_glyc3p_e	GSMM_103	EX_diact_e	('NTC', 'Neutral')	NTC	Neutral
236	EX_4hbz_e	GSMM_365	EX_glyc3p_e	GSMM_103	EX_diact_e	('NTC', 'Neutral')	NTC	Neutral
239	EX_4hbz_e	GSMM_024	EX_istfrnA_e	GSMM_103	EX_diact_e	('NTC', 'Neutral')	NTC	Neutral
248	EX_4hbz_e	GSMM_142	EX_istfrnA_e	GSMM_103	EX_diact_e	('NTC', 'Neutral')	NTC	Neutral
254	EX_4hbz_e	GSMM_225	EX_istfrnA_e	GSMM_103	EX_diact_e	('NTC', 'Neutral')	NTC	Neutral
255	EX_4hbz_e	GSMM_256	EX_istfrnA_e	GSMM_103	EX_diact_e	('NTC', 'Neutral')	NTC	Neutral
256	EX_4hbz_e	GSMM_265	EX_istfrnA_e	GSMM_103	EX_diact_e	('NTC', 'Neutral')	NTC	Neutral
262	EX_4hbz_e	GSMM_374	EX_istfrnA_e	GSMM_103	EX_diact_e	('NTC', 'Neutral')	NTC	Neutral
270	EX_4hbz_e	GSMM_024	EX_fald_e	GSMM_103	EX_diact_e	('NTC', 'Neutral')	NTC	Neutral
279	EX_4hbz_e	GSMM_057	EX_fald_e	GSMM_103	EX_diact_e	('NTC', 'Neutral')	NTC	Neutral
284	EX_4hbz_e	GSMM_093	EX_fald_e	GSMM_103	EX_diact_e	('NTC', 'Neutral')	NTC	Neutral
291	EX_4hbz_e	GSMM_142	EX_fald_e	GSMM_103	EX_diact_e	('NTC', 'Neutral')	NTC	Neutral
294	EX_4hbz_e	GSMM_161	EX_fald_e	GSMM_103	EX_diact_e	('NTC', 'Neutral')	NTC	Neutral
301	EX_4hbz_e	GSMM_220	EX_fald_e	GSMM_103	EX_diact_e	('NTC', 'Neutral')	NTC	Neutral
302	EX_4hbz_e	GSMM_225	EX_fald_e	GSMM_103	EX_diact_e	('NTC', 'Neutral')	NTC	Neutral
304	EX_4hbz_e	GSMM_232	EX_fald_e	GSMM_103	EX_diact_e	('NTC', 'Neutral')	NTC	Neutral
306	EX_4hbz_e	GSMM_256	EX_fald_e	GSMM_103	EX_diact_e	('NTC', 'Neutral')	NTC	Neutral
307	EX_4hbz_e	GSMM_261	EX_fald_e	GSMM_103	EX_diact_e	('NTC', 'Neutral')	NTC	Neutral
308	EX_4hbz_e	GSMM_262	EX_fald_e	GSMM_103	EX_diact_e	('NTC', 'Neutral')	NTC	Neutral
309	EX_4hbz_e	GSMM_265	EX_fald_e	GSMM_103	EX_diact_e	('NTC', 'Neutral')	NTC	Neutral
312	EX_4hbz_e	GSMM_280	EX_fald_e	GSMM_103	EX_diact_e	('NTC', 'Neutral')	NTC	Neutral
313	EX_4hbz_e	GSMM_306	EX_fald_e	GSMM_103	EX_diact_e	('NTC', 'Neutral')	NTC	Neutral
325	EX_4hbz_e	GSMM_365	EX_fald_e	GSMM_103	EX_diact_e	('NTC', 'Neutral')	NTC	Neutral
326	EX_4hbz_e	GSMM_374	EX_fald_e	GSMM_103	EX_diact_e	('NTC', 'Neutral')	NTC	Neutral
332	EX_4hbz_e	GSMM_024	EX_ptrc_e	GSMM_103	EX_diact_e	('NTC', 'Neutral')	NTC	Neutral
340	EX_4hbz_e	GSMM_057	EX_ptrc_e	GSMM_103	EX_diact_e	('NTC', 'Neutral')	NTC	Neutral
347	EX_4hbz_e	GSMM_142	EX_ptrc_e	GSMM_103	EX_diact_e	('NTC', 'Neutral')	NTC	Neutral
351	EX_4hbz_e	GSMM_161	EX_ptrc_e	GSMM_103	EX_diact_e	('NTC', 'Neutral')	NTC	Neutral
357	EX_4hbz_e	GSMM_220	EX_ptrc_e	GSMM_103	EX_diact_e	('NTC', 'Neutral')	NTC	Neutral
358	EX_4hbz_e	GSMM_225	EX_ptrc_e	GSMM_103	EX_diact_e	('NTC', 'Neutral')	NTC	Neutral
361	EX_4hbz_e	GSMM_256	EX_ptrc_e	GSMM_103	EX_diact_e	('NTC', 'Neutral')	NTC	Neutral
362	EX_4hbz_e	GSMM_261	EX_ptrc_e	GSMM_103	EX_diact_e	('NTC', 'Neutral')	NTC	Neutral
363	EX_4hbz_e	GSMM_262	EX_ptrc_e	GSMM_103	EX_diact_e	('NTC', 'Neutral')	NTC	Neutral
365	EX_4hbz_e	GSMM_306	EX_ptrc_e	GSMM_103	EX_diact_e	('NTC', 'Neutral')	NTC	Neutral
375	EX_4hbz_e	GSMM_365	EX_ptrc_e	GSMM_103	EX_diact_e	('NTC', 'Neutral')	NTC	Neutral
376	EX_4hbz_e	GSMM_374	EX_ptrc_e	GSMM_103	EX_diact_e	('NTC', 'Neutral')	NTC	Neutral
382	EX_4hbz_e	GSMM_024	EX_rib__D_e	GSMM_103	EX_diact_e	('NTC', 'Neutral')	NTC	Neutral
389	EX_4hbz_e	GSMM_057	EX_rib__D_e	GSMM_103	EX_diact_e	('NTC', 'Neutral')	NTC	Neutral
392	EX_4hbz_e	GSMM_093	EX_rib__D_e	GSMM_103	EX_diact_e	('NTC', 'Neutral')	NTC	Neutral
394	EX_4hbz_e	GSMM_104	EX_rib__D_e	GSMM_103	EX_diact_e	('NTC', 'Neutral')	NTC	Neutral
398	EX_4hbz_e	GSMM_142	EX_rib__D_e	GSMM_103	EX_diact_e	('NTC', 'Neutral')	NTC	Neutral
405	EX_4hbz_e	GSMM_220	EX_rib__D_e	GSMM_103	EX_diact_e	('NTC', 'Neutral')	NTC	Neutral
406	EX_4hbz_e	GSMM_225	EX_rib__D_e	GSMM_103	EX_diact_e	('NTC', 'Neutral')	NTC	Neutral
408	EX_4hbz_e	GSMM_232	EX_rib__D_e	GSMM_103	EX_diact_e	('NTC', 'Neutral')	NTC	Neutral
409	EX_4hbz_e	GSMM_256	EX_rib__D_e	GSMM_103	EX_diact_e	('NTC', 'Neutral')	NTC	Neutral
410	EX_4hbz_e	GSMM_262	EX_rib__D_e	GSMM_103	EX_diact_e	('NTC', 'Neutral')	NTC	Neutral
411	EX_4hbz_e	GSMM_265	EX_rib__D_e	GSMM_103	EX_diact_e	('NTC', 'Neutral')	NTC	Neutral
413	EX_4hbz_e	GSMM_280	EX_rib__D_e	GSMM_103	EX_diact_e	('NTC', 'Neutral')	NTC	Neutral
414	EX_4hbz_e	GSMM_306	EX_rib__D_e	GSMM_103	EX_diact_e	('NTC', 'Neutral')	NTC	Neutral
426	EX_4hbz_e	GSMM_365	EX_rib__D_e	GSMM_103	EX_diact_e	('NTC', 'Neutral')	NTC	Neutral
427	EX_4hbz_e	GSMM_374	EX_rib__D_e	GSMM_103	EX_diact_e	('NTC', 'Neutral')	NTC	Neutral
431	EX_4hbz_e	GSMM_024	EX_actn__R_e	GSMM_103	EX_diact_e	('NTC', 'Neutral')	NTC	Neutral
439	EX_4hbz_e	GSMM_104	EX_actn__R_e	GSMM_103	EX_diact_e	('NTC', 'Neutral')	NTC	Neutral
446	EX_4hbz_e	GSMM_262	EX_actn__R_e	GSMM_103	EX_diact_e	('NTC', 'Neutral')	NTC	Neutral
447	EX_4hbz_e	GSMM_280	EX_actn__R_e	GSMM_103	EX_diact_e	('NTC', 'Neutral')	NTC	Neutral
454	EX_4hbz_e	GSMM_365	EX_actn__R_e	GSMM_103	EX_diact_e	('NTC', 'Neutral')	NTC	Neutral
455	EX_4hbz_e	GSMM_374	EX_actn__R_e	GSMM_103	EX_diact_e	('NTC', 'Neutral')	NTC	Neutral
462	EX_4hbz_e	GSMM_024	EX_spmd_e	GSMM_103	EX_diact_e	('NTC', 'Neutral')	NTC	Neutral
474	EX_4hbz_e	GSMM_104	EX_spmd_e	GSMM_103	EX_diact_e	('NTC', 'Neutral')	NTC	Neutral
479	EX_4hbz_e	GSMM_142	EX_spmd_e	GSMM_103	EX_diact_e	('NTC', 'Neutral')	NTC	Neutral
483	EX_4hbz_e	GSMM_161	EX_spmd_e	GSMM_103	EX_diact_e	('NTC', 'Neutral')	NTC	Neutral
488	EX_4hbz_e	GSMM_220	EX_spmd_e	GSMM_103	EX_diact_e	('NTC', 'Neutral')	NTC	Neutral
489	EX_4hbz_e	GSMM_225	EX_spmd_e	GSMM_103	EX_diact_e	('NTC', 'Neutral')	NTC	Neutral
491	EX_4hbz_e	GSMM_232	EX_spmd_e	GSMM_103	EX_diact_e	('NTC', 'Neutral')	NTC	Neutral
492	EX_4hbz_e	GSMM_256	EX_spmd_e	GSMM_103	EX_diact_e	('NTC', 'Neutral')	NTC	Neutral
493	EX_4hbz_e	GSMM_261	EX_spmd_e	GSMM_103	EX_diact_e	('NTC', 'Neutral')	NTC	Neutral
494	EX_4hbz_e	GSMM_265	EX_spmd_e	GSMM_103	EX_diact_e	('NTC', 'Neutral')	NTC	Neutral
502	EX_4hbz_e	GSMM_365	EX_spmd_e	GSMM_103	EX_diact_e	('NTC', 'Neutral')	NTC	Neutral
503	EX_4hbz_e	GSMM_374	EX_spmd_e	GSMM_103	EX_diact_e	('NTC', 'Neutral')	NTC	Neutral
512	EX_4hbz_e	GSMM_024	EX_glyc_e	GSMM_103	EX_diact_e	('NTC', 'Neutral')	NTC	Neutral
521	EX_4hbz_e	GSMM_057	EX_glyc_e	GSMM_103	EX_diact_e	('NTC', 'Neutral')	NTC	Neutral
525	EX_4hbz_e	GSMM_093	EX_glyc_e	GSMM_103	EX_diact_e	('NTC', 'Neutral')	NTC	Neutral
527	EX_4hbz_e	GSMM_104	EX_glyc_e	GSMM_103	EX_diact_e	('NTC', 'Neutral')	NTC	Neutral
537	EX_4hbz_e	GSMM_161	EX_glyc_e	GSMM_103	EX_diact_e	('NTC', 'Neutral')	NTC	Neutral
543	EX_4hbz_e	GSMM_220	EX_glyc_e	GSMM_103	EX_diact_e	('NTC', 'Neutral')	NTC	Neutral
544	EX_4hbz_e	GSMM_225	EX_glyc_e	GSMM_103	EX_diact_e	('NTC', 'Neutral')	NTC	Neutral
546	EX_4hbz_e	GSMM_232	EX_glyc_e	GSMM_103	EX_diact_e	('NTC', 'Neutral')	NTC	Neutral
548	EX_4hbz_e	GSMM_256	EX_glyc_e	GSMM_103	EX_diact_e	('NTC', 'Neutral')	NTC	Neutral
549	EX_4hbz_e	GSMM_261	EX_glyc_e	GSMM_103	EX_diact_e	('NTC', 'Neutral')	NTC	Neutral
550	EX_4hbz_e	GSMM_262	EX_glyc_e	GSMM_103	EX_diact_e	('NTC', 'Neutral')	NTC	Neutral
551	EX_4hbz_e	GSMM_265	EX_glyc_e	GSMM_103	EX_diact_e	('NTC', 'Neutral')	NTC	Neutral
554	EX_4hbz_e	GSMM_280	EX_glyc_e	GSMM_103	EX_diact_e	('NTC', 'Neutral')	NTC	Neutral
566	EX_4hbz_e	GSMM_365	EX_glyc_e	GSMM_103	EX_diact_e	('NTC', 'Neutral')	NTC	Neutral
567	EX_4hbz_e	GSMM_374	EX_glyc_e	GSMM_103	EX_diact_e	('NTC', 'Neutral')	NTC	Neutral
576	EX_4hbz_e	GSMM_024	EX_fe3pyovd_kt_e	GSMM_103	EX_diact_e	('NTC', 'Neutral')	NTC	Neutral
585	EX_4hbz_e	GSMM_057	EX_fe3pyovd_kt_e	GSMM_103	EX_diact_e	('NTC', 'Neutral')	NTC	Neutral
590	EX_4hbz_e	GSMM_093	EX_fe3pyovd_kt_e	GSMM_103	EX_diact_e	('NTC', 'Neutral')	NTC	Neutral
592	EX_4hbz_e	GSMM_104	EX_fe3pyovd_kt_e	GSMM_103	EX_diact_e	('NTC', 'Neutral')	NTC	Neutral
598	EX_4hbz_e	GSMM_142	EX_fe3pyovd_kt_e	GSMM_103	EX_diact_e	('NTC', 'Neutral')	NTC	Neutral
603	EX_4hbz_e	GSMM_161	EX_fe3pyovd_kt_e	GSMM_103	EX_diact_e	('NTC', 'Neutral')	NTC	Neutral
610	EX_4hbz_e	GSMM_220	EX_fe3pyovd_kt_e	GSMM_103	EX_diact_e	('NTC', 'Neutral')	NTC	Neutral
611	EX_4hbz_e	GSMM_225	EX_fe3pyovd_kt_e	GSMM_103	EX_diact_e	('NTC', 'Neutral')	NTC	Neutral
613	EX_4hbz_e	GSMM_232	EX_fe3pyovd_kt_e	GSMM_103	EX_diact_e	('NTC', 'Neutral')	NTC	Neutral
615	EX_4hbz_e	GSMM_256	EX_fe3pyovd_kt_e	GSMM_103	EX_diact_e	('NTC', 'Neutral')	NTC	Neutral
616	EX_4hbz_e	GSMM_261	EX_fe3pyovd_kt_e	GSMM_103	EX_diact_e	('NTC', 'Neutral')	NTC	Neutral
617	EX_4hbz_e	GSMM_262	EX_fe3pyovd_kt_e	GSMM_103	EX_diact_e	('NTC', 'Neutral')	NTC	Neutral
618	EX_4hbz_e	GSMM_265	EX_fe3pyovd_kt_e	GSMM_103	EX_diact_e	('NTC', 'Neutral')	NTC	Neutral
621	EX_4hbz_e	GSMM_280	EX_fe3pyovd_kt_e	GSMM_103	EX_diact_e	('NTC', 'Neutral')	NTC	Neutral
622	EX_4hbz_e	GSMM_306	EX_fe3pyovd_kt_e	GSMM_103	EX_diact_e	('NTC', 'Neutral')	NTC	Neutral
634	EX_4hbz_e	GSMM_365	EX_fe3pyovd_kt_e	GSMM_103	EX_diact_e	('NTC', 'Neutral')	NTC	Neutral
635	EX_4hbz_e	GSMM_374	EX_fe3pyovd_kt_e	GSMM_103	EX_diact_e	('NTC', 'Neutral')	NTC	Neutral
644	EX_4hbz_e	GSMM_024	EX_pyovd_kt_e	GSMM_103	EX_diact_e	('NTC', 'Neutral')	NTC	Neutral
653	EX_4hbz_e	GSMM_057	EX_pyovd_kt_e	GSMM_103	EX_diact_e	('NTC', 'Neutral')	NTC	Neutral
658	EX_4hbz_e	GSMM_093	EX_pyovd_kt_e	GSMM_103	EX_diact_e	('NTC', 'Neutral')	NTC	Neutral
660	EX_4hbz_e	GSMM_104	EX_pyovd_kt_e	GSMM_103	EX_diact_e	('NTC', 'Neutral')	NTC	Neutral
666	EX_4hbz_e	GSMM_142	EX_pyovd_kt_e	GSMM_103	EX_diact_e	('NTC', 'Neutral')	NTC	Neutral
671	EX_4hbz_e	GSMM_161	EX_pyovd_kt_e	GSMM_103	EX_diact_e	('NTC', 'Neutral')	NTC	Neutral
678	EX_4hbz_e	GSMM_220	EX_pyovd_kt_e	GSMM_103	EX_diact_e	('NTC', 'Neutral')	NTC	Neutral
679	EX_4hbz_e	GSMM_225	EX_pyovd_kt_e	GSMM_103	EX_diact_e	('NTC', 'Neutral')	NTC	Neutral
681	EX_4hbz_e	GSMM_232	EX_pyovd_kt_e	GSMM_103	EX_diact_e	('NTC', 'Neutral')	NTC	Neutral
683	EX_4hbz_e	GSMM_256	EX_pyovd_kt_e	GSMM_103	EX_diact_e	('NTC', 'Neutral')	NTC	Neutral
684	EX_4hbz_e	GSMM_261	EX_pyovd_kt_e	GSMM_103	EX_diact_e	('NTC', 'Neutral')	NTC	Neutral
685	EX_4hbz_e	GSMM_262	EX_pyovd_kt_e	GSMM_103	EX_diact_e	('NTC', 'Neutral')	NTC	Neutral
686	EX_4hbz_e	GSMM_265	EX_pyovd_kt_e	GSMM_103	EX_diact_e	('NTC', 'Neutral')	NTC	Neutral
689	EX_4hbz_e	GSMM_280	EX_pyovd_kt_e	GSMM_103	EX_diact_e	('NTC', 'Neutral')	NTC	Neutral
690	EX_4hbz_e	GSMM_306	EX_pyovd_kt_e	GSMM_103	EX_diact_e	('NTC', 'Neutral')	NTC	Neutral
702	EX_4hbz_e	GSMM_365	EX_pyovd_kt_e	GSMM_103	EX_diact_e	('NTC', 'Neutral')	NTC	Neutral
703	EX_4hbz_e	GSMM_374	EX_pyovd_kt_e	GSMM_103	EX_diact_e	('NTC', 'Neutral')	NTC	Neutral
709	EX_4hbz_e	GSMM_104	EX_cellb_e	GSMM_103	EX_diact_e	('NTC', 'Neutral')	NTC	Neutral
718	EX_4hbz_e	GSMM_057	EX_lac__L_e	GSMM_103	EX_diact_e	('NTC', 'Neutral')	NTC	Neutral
719	EX_4hbz_e	GSMM_104	EX_lac__L_e	GSMM_103	EX_diact_e	('NTC', 'Neutral')	NTC	Neutral
723	EX_4hbz_e	GSMM_161	EX_lac__L_e	GSMM_103	EX_diact_e	('NTC', 'Neutral')	NTC	Neutral
727	EX_4hbz_e	GSMM_232	EX_lac__L_e	GSMM_103	EX_diact_e	('NTC', 'Neutral')	NTC	Neutral
728	EX_4hbz_e	GSMM_256	EX_lac__L_e	GSMM_103	EX_diact_e	('NTC', 'Neutral')	NTC	Neutral
729	EX_4hbz_e	GSMM_265	EX_lac__L_e	GSMM_103	EX_diact_e	('NTC', 'Neutral')	NTC	Neutral
730	EX_4hbz_e	GSMM_306	EX_lac__L_e	GSMM_103	EX_diact_e	('NTC', 'Neutral')	NTC	Neutral
736	EX_4hbz_e	GSMM_365	EX_lac__L_e	GSMM_103	EX_diact_e	('NTC', 'Neutral')	NTC	Neutral
737	EX_4hbz_e	GSMM_374	EX_lac__L_e	GSMM_103	EX_diact_e	('NTC', 'Neutral')	NTC	Neutral
750	EX_4hbz_e	GSMM_104	EX_oxa_e	GSMM_103	EX_diact_e	('NTC', 'Neutral')	NTC	Neutral
754	EX_4hbz_e	GSMM_142	EX_oxa_e	GSMM_103	EX_diact_e	('NTC', 'Neutral')	NTC	Neutral
756	EX_4hbz_e	GSMM_161	EX_oxa_e	GSMM_103	EX_diact_e	('NTC', 'Neutral')	NTC	Neutral
760	EX_4hbz_e	GSMM_220	EX_oxa_e	GSMM_103	EX_diact_e	('NTC', 'Neutral')	NTC	Neutral
761	EX_4hbz_e	GSMM_225	EX_oxa_e	GSMM_103	EX_diact_e	('NTC', 'Neutral')	NTC	Neutral
762	EX_4hbz_e	GSMM_232	EX_oxa_e	GSMM_103	EX_diact_e	('NTC', 'Neutral')	NTC	Neutral
763	EX_4hbz_e	GSMM_265	EX_oxa_e	GSMM_103	EX_diact_e	('NTC', 'Neutral')	NTC	Neutral
764	EX_4hbz_e	GSMM_280	EX_oxa_e	GSMM_103	EX_diact_e	('NTC', 'Neutral')	NTC	Neutral
765	EX_4hbz_e	GSMM_306	EX_oxa_e	GSMM_103	EX_diact_e	('NTC', 'Neutral')	NTC	Neutral
770	EX_4hbz_e	GSMM_365	EX_oxa_e	GSMM_103	EX_diact_e	('NTC', 'Neutral')	NTC	Neutral
776	EX_4hbz_e	GSMM_024	EX_anhgm_e	GSMM_103	EX_diact_e	('NTC', 'Neutral')	NTC	Neutral
780	EX_4hbz_e	GSMM_057	EX_anhgm_e	GSMM_103	EX_diact_e	('NTC', 'Neutral')	NTC	Neutral
787	EX_4hbz_e	GSMM_161	EX_anhgm_e	GSMM_103	EX_diact_e	('NTC', 'Neutral')	NTC	Neutral
792	EX_4hbz_e	GSMM_220	EX_anhgm_e	GSMM_103	EX_diact_e	('NTC', 'Neutral')	NTC	Neutral
793	EX_4hbz_e	GSMM_225	EX_anhgm_e	GSMM_103	EX_diact_e	('NTC', 'Neutral')	NTC	Neutral
795	EX_4hbz_e	GSMM_256	EX_anhgm_e	GSMM_103	EX_diact_e	('NTC', 'Neutral')	NTC	Neutral
796	EX_4hbz_e	GSMM_261	EX_anhgm_e	GSMM_103	EX_diact_e	('NTC', 'Neutral')	NTC	Neutral
797	EX_4hbz_e	GSMM_262	EX_anhgm_e	GSMM_103	EX_diact_e	('NTC', 'Neutral')	NTC	Neutral
798	EX_4hbz_e	GSMM_265	EX_anhgm_e	GSMM_103	EX_diact_e	('NTC', 'Neutral')	NTC	Neutral
801	EX_4hbz_e	GSMM_280	EX_anhgm_e	GSMM_103	EX_diact_e	('NTC', 'Neutral')	NTC	Neutral
806	EX_4hbz_e	GSMM_365	EX_anhgm_e	GSMM_103	EX_diact_e	('NTC', 'Neutral')	NTC	Neutral
807	EX_4hbz_e	GSMM_374	EX_anhgm_e	GSMM_103	EX_diact_e	('NTC', 'Neutral')	NTC	Neutral
814	EX_4hbz_e	GSMM_024	EX_urea_e	GSMM_103	EX_diact_e	('NTC', 'Neutral')	NTC	Neutral
823	EX_4hbz_e	GSMM_057	EX_urea_e	GSMM_103	EX_diact_e	('NTC', 'Neutral')	NTC	Neutral
826	EX_4hbz_e	GSMM_093	EX_urea_e	GSMM_103	EX_diact_e	('NTC', 'Neutral')	NTC	Neutral
828	EX_4hbz_e	GSMM_104	EX_urea_e	GSMM_103	EX_diact_e	('NTC', 'Neutral')	NTC	Neutral
835	EX_4hbz_e	GSMM_161	EX_urea_e	GSMM_103	EX_diact_e	('NTC', 'Neutral')	NTC	Neutral
840	EX_4hbz_e	GSMM_220	EX_urea_e	GSMM_103	EX_diact_e	('NTC', 'Neutral')	NTC	Neutral
841	EX_4hbz_e	GSMM_232	EX_urea_e	GSMM_103	EX_diact_e	('NTC', 'Neutral')	NTC	Neutral
843	EX_4hbz_e	GSMM_256	EX_urea_e	GSMM_103	EX_diact_e	('NTC', 'Neutral')	NTC	Neutral
844	EX_4hbz_e	GSMM_261	EX_urea_e	GSMM_103	EX_diact_e	('NTC', 'Neutral')	NTC	Neutral
845	EX_4hbz_e	GSMM_262	EX_urea_e	GSMM_103	EX_diact_e	('NTC', 'Neutral')	NTC	Neutral
846	EX_4hbz_e	GSMM_265	EX_urea_e	GSMM_103	EX_diact_e	('NTC', 'Neutral')	NTC	Neutral
849	EX_4hbz_e	GSMM_280	EX_urea_e	GSMM_103	EX_diact_e	('NTC', 'Neutral')	NTC	Neutral
850	EX_4hbz_e	GSMM_306	EX_urea_e	GSMM_103	EX_diact_e	('NTC', 'Neutral')	NTC	Neutral
861	EX_4hbz_e	GSMM_365	EX_urea_e	GSMM_103	EX_diact_e	('NTC', 'Neutral')	NTC	Neutral
862	EX_4hbz_e	GSMM_374	EX_urea_e	GSMM_103	EX_diact_e	('NTC', 'Neutral')	NTC	Neutral
873	EX_4hbz_e	GSMM_093	EX_inost_e	GSMM_103	EX_diact_e	('NTC', 'Neutral')	NTC	Neutral
877	EX_4hbz_e	GSMM_142	EX_inost_e	GSMM_103	EX_diact_e	('NTC', 'Neutral')	NTC	Neutral
884	EX_4hbz_e	GSMM_225	EX_inost_e	GSMM_103	EX_diact_e	('NTC', 'Neutral')	NTC	Neutral
886	EX_4hbz_e	GSMM_265	EX_inost_e	GSMM_103	EX_diact_e	('NTC', 'Neutral')	NTC	Neutral
899	EX_4hbz_e	GSMM_104	EX_chol_e	GSMM_103	EX_diact_e	('NTC', 'Neutral')	NTC	Neutral
902	EX_4hbz_e	GSMM_142	EX_chol_e	GSMM_103	EX_diact_e	('NTC', 'Neutral')	NTC	Neutral
908	EX_4hbz_e	GSMM_220	EX_chol_e	GSMM_103	EX_diact_e	('NTC', 'Neutral')	NTC	Neutral
909	EX_4hbz_e	GSMM_225	EX_chol_e	GSMM_103	EX_diact_e	('NTC', 'Neutral')	NTC	Neutral
911	EX_4hbz_e	GSMM_256	EX_chol_e	GSMM_103	EX_diact_e	('NTC', 'Neutral')	NTC	Neutral
912	EX_4hbz_e	GSMM_261	EX_chol_e	GSMM_103	EX_diact_e	('NTC', 'Neutral')	NTC	Neutral
913	EX_4hbz_e	GSMM_262	EX_chol_e	GSMM_103	EX_diact_e	('NTC', 'Neutral')	NTC	Neutral
914	EX_4hbz_e	GSMM_265	EX_chol_e	GSMM_103	EX_diact_e	('NTC', 'Neutral')	NTC	Neutral
916	EX_4hbz_e	GSMM_280	EX_chol_e	GSMM_103	EX_diact_e	('NTC', 'Neutral')	NTC	Neutral
925	EX_4hbz_e	GSMM_365	EX_chol_e	GSMM_103	EX_diact_e	('NTC', 'Neutral')	NTC	Neutral
928	EX_4hbz_e	GSMM_024	EX_stfrnA_e	GSMM_103	EX_diact_e	('NTC', 'Neutral')	NTC	Neutral
938	EX_4hbz_e	GSMM_142	EX_stfrnA_e	GSMM_103	EX_diact_e	('NTC', 'Neutral')	NTC	Neutral
945	EX_4hbz_e	GSMM_225	EX_stfrnA_e	GSMM_103	EX_diact_e	('NTC', 'Neutral')	NTC	Neutral
947	EX_4hbz_e	GSMM_256	EX_stfrnA_e	GSMM_103	EX_diact_e	('NTC', 'Neutral')	NTC	Neutral
948	EX_4hbz_e	GSMM_265	EX_stfrnA_e	GSMM_103	EX_diact_e	('NTC', 'Neutral')	NTC	Neutral
955	EX_4hbz_e	GSMM_374	EX_stfrnA_e	GSMM_103	EX_diact_e	('NTC', 'Neutral')	NTC	Neutral
961	EX_4hbz_e	GSMM_057	EX_glyald_e	GSMM_103	EX_diact_e	('NTC', 'Neutral')	NTC	Neutral
963	EX_4hbz_e	GSMM_093	EX_glyald_e	GSMM_103	EX_diact_e	('NTC', 'Neutral')	NTC	Neutral
970	EX_4hbz_e	GSMM_161	EX_glyald_e	GSMM_103	EX_diact_e	('NTC', 'Neutral')	NTC	Neutral
975	EX_4hbz_e	GSMM_220	EX_glyald_e	GSMM_103	EX_diact_e	('NTC', 'Neutral')	NTC	Neutral
977	EX_4hbz_e	GSMM_256	EX_glyald_e	GSMM_103	EX_diact_e	('NTC', 'Neutral')	NTC	Neutral
978	EX_4hbz_e	GSMM_261	EX_glyald_e	GSMM_103	EX_diact_e	('NTC', 'Neutral')	NTC	Neutral
979	EX_4hbz_e	GSMM_265	EX_glyald_e	GSMM_103	EX_diact_e	('NTC', 'Neutral')	NTC	Neutral
982	EX_4hbz_e	GSMM_306	EX_glyald_e	GSMM_103	EX_diact_e	('NTC', 'Neutral')	NTC	Neutral
987	EX_4hbz_e	GSMM_374	EX_glyald_e	GSMM_103	EX_diact_e	('NTC', 'Neutral')	NTC	Neutral
996	EX_4hbz_e	GSMM_057	EX_ura_e	GSMM_103	EX_diact_e	('NTC', 'Neutral')	NTC	Neutral
998	EX_4hbz_e	GSMM_093	EX_ura_e	GSMM_103	EX_diact_e	('NTC', 'Neutral')	NTC	Neutral
1002	EX_4hbz_e	GSMM_161	EX_ura_e	GSMM_103	EX_diact_e	('NTC', 'Neutral')	NTC	Neutral
1005	EX_4hbz_e	GSMM_220	EX_ura_e	GSMM_103	EX_diact_e	('NTC', 'Neutral')	NTC	Neutral
1007	EX_4hbz_e	GSMM_262	EX_ura_e	GSMM_103	EX_diact_e	('NTC', 'Neutral')	NTC	Neutral
1008	EX_4hbz_e	GSMM_265	EX_ura_e	GSMM_103	EX_diact_e	('NTC', 'Neutral')	NTC	Neutral
1017	EX_4hbz_e	GSMM_024	EX_gal_e	GSMM_103	EX_diact_e	('NTC', 'Neutral')	NTC	Neutral
1023	EX_4hbz_e	GSMM_057	EX_gal_e	GSMM_103	EX_diact_e	('NTC', 'Neutral')	NTC	Neutral
1027	EX_4hbz_e	GSMM_104	EX_gal_e	GSMM_103	EX_diact_e	('NTC', 'Neutral')	NTC	Neutral
1032	EX_4hbz_e	GSMM_142	EX_gal_e	GSMM_103	EX_diact_e	('NTC', 'Neutral')	NTC	Neutral
1037	EX_4hbz_e	GSMM_220	EX_gal_e	GSMM_103	EX_diact_e	('NTC', 'Neutral')	NTC	Neutral
1038	EX_4hbz_e	GSMM_225	EX_gal_e	GSMM_103	EX_diact_e	('NTC', 'Neutral')	NTC	Neutral
1040	EX_4hbz_e	GSMM_232	EX_gal_e	GSMM_103	EX_diact_e	('NTC', 'Neutral')	NTC	Neutral
1042	EX_4hbz_e	GSMM_256	EX_gal_e	GSMM_103	EX_diact_e	('NTC', 'Neutral')	NTC	Neutral
1043	EX_4hbz_e	GSMM_262	EX_gal_e	GSMM_103	EX_diact_e	('NTC', 'Neutral')	NTC	Neutral
1044	EX_4hbz_e	GSMM_265	EX_gal_e	GSMM_103	EX_diact_e	('NTC', 'Neutral')	NTC	Neutral
1054	EX_4hbz_e	GSMM_365	EX_gal_e	GSMM_103	EX_diact_e	('NTC', 'Neutral')	NTC	Neutral
1058	EX_4hbz_e	GSMM_024	EX_ala__D_e	GSMM_103	EX_diact_e	('NTC', 'Neutral')	NTC	Neutral
1062	EX_4hbz_e	GSMM_057	EX_ala__D_e	GSMM_103	EX_diact_e	('NTC', 'Neutral')	NTC	Neutral
1064	EX_4hbz_e	GSMM_104	EX_ala__D_e	GSMM_103	EX_diact_e	('NTC', 'Neutral')	NTC	Neutral
1067	EX_4hbz_e	GSMM_142	EX_ala__D_e	GSMM_103	EX_diact_e	('NTC', 'Neutral')	NTC	Neutral
1070	EX_4hbz_e	GSMM_161	EX_ala__D_e	GSMM_103	EX_diact_e	('NTC', 'Neutral')	NTC	Neutral
1073	EX_4hbz_e	GSMM_220	EX_ala__D_e	GSMM_103	EX_diact_e	('NTC', 'Neutral')	NTC	Neutral
1074	EX_4hbz_e	GSMM_225	EX_ala__D_e	GSMM_103	EX_diact_e	('NTC', 'Neutral')	NTC	Neutral
1075	EX_4hbz_e	GSMM_232	EX_ala__D_e	GSMM_103	EX_diact_e	('NTC', 'Neutral')	NTC	Neutral
1077	EX_4hbz_e	GSMM_256	EX_ala__D_e	GSMM_103	EX_diact_e	('NTC', 'Neutral')	NTC	Neutral
1078	EX_4hbz_e	GSMM_261	EX_ala__D_e	GSMM_103	EX_diact_e	('NTC', 'Neutral')	NTC	Neutral
1079	EX_4hbz_e	GSMM_262	EX_ala__D_e	GSMM_103	EX_diact_e	('NTC', 'Neutral')	NTC	Neutral
1081	EX_4hbz_e	GSMM_280	EX_ala__D_e	GSMM_103	EX_diact_e	('NTC', 'Neutral')	NTC	Neutral
1082	EX_4hbz_e	GSMM_306	EX_ala__D_e	GSMM_103	EX_diact_e	('NTC', 'Neutral')	NTC	Neutral
1089	EX_4hbz_e	GSMM_374	EX_ala__D_e	GSMM_103	EX_diact_e	('NTC', 'Neutral')	NTC	Neutral
1098	EX_4hbz_e	GSMM_104	EX_gua_e	GSMM_103	EX_diact_e	('NTC', 'Neutral')	NTC	Neutral
1102	EX_4hbz_e	GSMM_220	EX_gua_e	GSMM_103	EX_diact_e	('NTC', 'Neutral')	NTC	Neutral
1103	EX_4hbz_e	GSMM_225	EX_gua_e	GSMM_103	EX_diact_e	('NTC', 'Neutral')	NTC	Neutral
1104	EX_4hbz_e	GSMM_232	EX_gua_e	GSMM_103	EX_diact_e	('NTC', 'Neutral')	NTC	Neutral
1105	EX_4hbz_e	GSMM_262	EX_gua_e	GSMM_103	EX_diact_e	('NTC', 'Neutral')	NTC	Neutral
1106	EX_4hbz_e	GSMM_265	EX_gua_e	GSMM_103	EX_diact_e	('NTC', 'Neutral')	NTC	Neutral
1114	EX_4hbz_e	GSMM_093	EX_asp__D_e	GSMM_103	EX_diact_e	('NTC', 'Neutral')	NTC	Neutral
1116	EX_4hbz_e	GSMM_280	EX_asp__D_e	GSMM_103	EX_diact_e	('NTC', 'Neutral')	NTC	Neutral
1123	EX_4hbz_e	GSMM_024	EX_ind3ac_e	GSMM_103	EX_diact_e	('NTC', 'Neutral')	NTC	Neutral
1131	EX_4hbz_e	GSMM_057	EX_ind3ac_e	GSMM_103	EX_diact_e	('NTC', 'Neutral')	NTC	Neutral
1136	EX_4hbz_e	GSMM_093	EX_ind3ac_e	GSMM_103	EX_diact_e	('NTC', 'Neutral')	NTC	Neutral
1141	EX_4hbz_e	GSMM_142	EX_ind3ac_e	GSMM_103	EX_diact_e	('NTC', 'Neutral')	NTC	Neutral
1143	EX_4hbz_e	GSMM_161	EX_ind3ac_e	GSMM_103	EX_diact_e	('NTC', 'Neutral')	NTC	Neutral
1148	EX_4hbz_e	GSMM_220	EX_ind3ac_e	GSMM_103	EX_diact_e	('NTC', 'Neutral')	NTC	Neutral
1150	EX_4hbz_e	GSMM_232	EX_ind3ac_e	GSMM_103	EX_diact_e	('NTC', 'Neutral')	NTC	Neutral
1152	EX_4hbz_e	GSMM_261	EX_ind3ac_e	GSMM_103	EX_diact_e	('NTC', 'Neutral')	NTC	Neutral
1153	EX_4hbz_e	GSMM_262	EX_ind3ac_e	GSMM_103	EX_diact_e	('NTC', 'Neutral')	NTC	Neutral
1154	EX_4hbz_e	GSMM_265	EX_ind3ac_e	GSMM_103	EX_diact_e	('NTC', 'Neutral')	NTC	Neutral
1157	EX_4hbz_e	GSMM_280	EX_ind3ac_e	GSMM_103	EX_diact_e	('NTC', 'Neutral')	NTC	Neutral
1158	EX_4hbz_e	GSMM_306	EX_ind3ac_e	GSMM_103	EX_diact_e	('NTC', 'Neutral')	NTC	Neutral
1169	EX_4hbz_e	GSMM_365	EX_ind3ac_e	GSMM_103	EX_diact_e	('NTC', 'Neutral')	NTC	Neutral
1178	EX_4hbz_e	GSMM_093	EX_meoh_e	GSMM_103	EX_diact_e	('NTC', 'Neutral')	NTC	Neutral
1182	EX_4hbz_e	GSMM_142	EX_meoh_e	GSMM_103	EX_diact_e	('NTC', 'Neutral')	NTC	Neutral
1184	EX_4hbz_e	GSMM_161	EX_meoh_e	GSMM_103	EX_diact_e	('NTC', 'Neutral')	NTC	Neutral
1188	EX_4hbz_e	GSMM_225	EX_meoh_e	GSMM_103	EX_diact_e	('NTC', 'Neutral')	NTC	Neutral
1189	EX_4hbz_e	GSMM_232	EX_meoh_e	GSMM_103	EX_diact_e	('NTC', 'Neutral')	NTC	Neutral
1190	EX_4hbz_e	GSMM_261	EX_meoh_e	GSMM_103	EX_diact_e	('NTC', 'Neutral')	NTC	Neutral
1191	EX_4hbz_e	GSMM_262	EX_meoh_e	GSMM_103	EX_diact_e	('NTC', 'Neutral')	NTC	Neutral
1192	EX_4hbz_e	GSMM_265	EX_meoh_e	GSMM_103	EX_diact_e	('NTC', 'Neutral')	NTC	Neutral
1193	EX_4hbz_e	GSMM_306	EX_meoh_e	GSMM_103	EX_diact_e	('NTC', 'Neutral')	NTC	Neutral
1205	EX_4hbz_e	GSMM_024	EX_orn_e	GSMM_103	EX_diact_e	('NTC', 'Neutral')	NTC	Neutral
1210	EX_4hbz_e	GSMM_093	EX_orn_e	GSMM_103	EX_diact_e	('NTC', 'Neutral')	NTC	Neutral
1211	EX_4hbz_e	GSMM_104	EX_orn_e	GSMM_103	EX_diact_e	('NTC', 'Neutral')	NTC	Neutral
1215	EX_4hbz_e	GSMM_142	EX_orn_e	GSMM_103	EX_diact_e	('NTC', 'Neutral')	NTC	Neutral
1218	EX_4hbz_e	GSMM_161	EX_orn_e	GSMM_103	EX_diact_e	('NTC', 'Neutral')	NTC	Neutral
1223	EX_4hbz_e	GSMM_256	EX_orn_e	GSMM_103	EX_diact_e	('NTC', 'Neutral')	NTC	Neutral
1224	EX_4hbz_e	GSMM_261	EX_orn_e	GSMM_103	EX_diact_e	('NTC', 'Neutral')	NTC	Neutral
1225	EX_4hbz_e	GSMM_262	EX_orn_e	GSMM_103	EX_diact_e	('NTC', 'Neutral')	NTC	Neutral
1227	EX_4hbz_e	GSMM_306	EX_orn_e	GSMM_103	EX_diact_e	('NTC', 'Neutral')	NTC	Neutral
1233	EX_4hbz_e	GSMM_365	EX_orn_e	GSMM_103	EX_diact_e	('NTC', 'Neutral')	NTC	Neutral
1234	EX_4hbz_e	GSMM_374	EX_orn_e	GSMM_103	EX_diact_e	('NTC', 'Neutral')	NTC	Neutral
1244	EX_4hbz_e	GSMM_142	EX_gthrd_e	GSMM_103	EX_diact_e	('NTC', 'Neutral')	NTC	Neutral
1248	EX_4hbz_e	GSMM_265	EX_gthrd_e	GSMM_103	EX_diact_e	('NTC', 'Neutral')	NTC	Neutral
1250	EX_4hbz_e	GSMM_280	EX_gthrd_e	GSMM_103	EX_diact_e	('NTC', 'Neutral')	NTC	Neutral
1251	EX_4hbz_e	GSMM_306	EX_gthrd_e	GSMM_103	EX_diact_e	('NTC', 'Neutral')	NTC	Neutral
1253	EX_4hbz_e	GSMM_365	EX_gthrd_e	GSMM_103	EX_diact_e	('NTC', 'Neutral')	NTC	Neutral
1267	EX_4hbz_e	GSMM_225	EX_pacald_e	GSMM_103	EX_diact_e	('NTC', 'Neutral')	NTC	Neutral
1268	EX_4hbz_e	GSMM_232	EX_pacald_e	GSMM_103	EX_diact_e	('NTC', 'Neutral')	NTC	Neutral
1270	EX_4hbz_e	GSMM_265	EX_pacald_e	GSMM_103	EX_diact_e	('NTC', 'Neutral')	NTC	Neutral
1284	EX_4hbz_e	GSMM_142	EX_pea_e	GSMM_103	EX_diact_e	('NTC', 'Neutral')	NTC	Neutral
1286	EX_4hbz_e	GSMM_225	EX_pea_e	GSMM_103	EX_diact_e	('NTC', 'Neutral')	NTC	Neutral
1287	EX_4hbz_e	GSMM_265	EX_pea_e	GSMM_103	EX_diact_e	('NTC', 'Neutral')	NTC	Neutral
1290	EX_4hbz_e	GSMM_374	EX_pea_e	GSMM_103	EX_diact_e	('NTC', 'Neutral')	NTC	Neutral
1302	EX_4hbz_e	GSMM_232	EX_glu__L_e	GSMM_103	EX_diact_e	('NTC', 'Neutral')	NTC	Neutral
1303	EX_4hbz_e	GSMM_256	EX_glu__L_e	GSMM_103	EX_diact_e	('NTC', 'Neutral')	NTC	Neutral
1304	EX_4hbz_e	GSMM_262	EX_glu__L_e	GSMM_103	EX_diact_e	('NTC', 'Neutral')	NTC	Neutral
1305	EX_4hbz_e	GSMM_265	EX_glu__L_e	GSMM_103	EX_diact_e	('NTC', 'Neutral')	NTC	Neutral
1306	EX_4hbz_e	GSMM_280	EX_glu__L_e	GSMM_103	EX_diact_e	('NTC', 'Neutral')	NTC	Neutral
1307	EX_4hbz_e	GSMM_306	EX_glu__L_e	GSMM_103	EX_diact_e	('NTC', 'Neutral')	NTC	Neutral
1310	EX_4hbz_e	GSMM_365	EX_glu__L_e	GSMM_103	EX_diact_e	('NTC', 'Neutral')	NTC	Neutral
1311	EX_4hbz_e	GSMM_374	EX_glu__L_e	GSMM_103	EX_diact_e	('NTC', 'Neutral')	NTC	Neutral
1327	EX_4hbz_e	GSMM_232	EX_cgly_e	GSMM_103	EX_diact_e	('NTC', 'Neutral')	NTC	Neutral
1328	EX_4hbz_e	GSMM_256	EX_cgly_e	GSMM_103	EX_diact_e	('NTC', 'Neutral')	NTC	Neutral
1329	EX_4hbz_e	GSMM_265	EX_cgly_e	GSMM_103	EX_diact_e	('NTC', 'Neutral')	NTC	Neutral
1331	EX_4hbz_e	GSMM_280	EX_cgly_e	GSMM_103	EX_diact_e	('NTC', 'Neutral')	NTC	Neutral
1332	EX_4hbz_e	GSMM_306	EX_cgly_e	GSMM_103	EX_diact_e	('NTC', 'Neutral')	NTC	Neutral
1336	EX_4hbz_e	GSMM_365	EX_cgly_e	GSMM_103	EX_diact_e	('NTC', 'Neutral')	NTC	Neutral
1337	EX_4hbz_e	GSMM_374	EX_cgly_e	GSMM_103	EX_diact_e	('NTC', 'Neutral')	NTC	Neutral
1343	EX_4hbz_e	GSMM_057	EX_glc__D_e	GSMM_103	EX_diact_e	('NTC', 'Neutral')	NTC	Neutral
1347	EX_4hbz_e	GSMM_142	EX_glc__D_e	GSMM_103	EX_diact_e	('NTC', 'Neutral')	NTC	Neutral
1354	EX_4hbz_e	GSMM_225	EX_glc__D_e	GSMM_103	EX_diact_e	('NTC', 'Neutral')	NTC	Neutral
1357	EX_4hbz_e	GSMM_262	EX_glc__D_e	GSMM_103	EX_diact_e	('NTC', 'Neutral')	NTC	Neutral
1358	EX_4hbz_e	GSMM_265	EX_glc__D_e	GSMM_103	EX_diact_e	('NTC', 'Neutral')	NTC	Neutral
1360	EX_4hbz_e	GSMM_306	EX_glc__D_e	GSMM_103	EX_diact_e	('NTC', 'Neutral')	NTC	Neutral
1369	EX_4hbz_e	GSMM_365	EX_glc__D_e	GSMM_103	EX_diact_e	('NTC', 'Neutral')	NTC	Neutral
1370	EX_4hbz_e	GSMM_374	EX_glc__D_e	GSMM_103	EX_diact_e	('NTC', 'Neutral')	NTC	Neutral
1374	EX_4hbz_e	GSMM_024	EX_pheme_e	GSMM_103	EX_diact_e	('NTC', 'Neutral')	NTC	Neutral
1376	EX_4hbz_e	GSMM_057	EX_pheme_e	GSMM_103	EX_diact_e	('NTC', 'Neutral')	NTC	Neutral
1381	EX_4hbz_e	GSMM_093	EX_pheme_e	GSMM_103	EX_diact_e	('NTC', 'Neutral')	NTC	Neutral
1385	EX_4hbz_e	GSMM_142	EX_pheme_e	GSMM_103	EX_diact_e	('NTC', 'Neutral')	NTC	Neutral
1391	EX_4hbz_e	GSMM_232	EX_pheme_e	GSMM_103	EX_diact_e	('NTC', 'Neutral')	NTC	Neutral
1392	EX_4hbz_e	GSMM_265	EX_pheme_e	GSMM_103	EX_diact_e	('NTC', 'Neutral')	NTC	Neutral
1407	EX_4hbz_e	GSMM_057	EX_thym_e	GSMM_103	EX_diact_e	('NTC', 'Neutral')	NTC	Neutral
1409	EX_4hbz_e	GSMM_093	EX_thym_e	GSMM_103	EX_diact_e	('NTC', 'Neutral')	NTC	Neutral
1410	EX_4hbz_e	GSMM_104	EX_thym_e	GSMM_103	EX_diact_e	('NTC', 'Neutral')	NTC	Neutral
1412	EX_4hbz_e	GSMM_142	EX_thym_e	GSMM_103	EX_diact_e	('NTC', 'Neutral')	NTC	Neutral
1416	EX_4hbz_e	GSMM_161	EX_thym_e	GSMM_103	EX_diact_e	('NTC', 'Neutral')	NTC	Neutral
1418	EX_4hbz_e	GSMM_220	EX_thym_e	GSMM_103	EX_diact_e	('NTC', 'Neutral')	NTC	Neutral
1419	EX_4hbz_e	GSMM_225	EX_thym_e	GSMM_103	EX_diact_e	('NTC', 'Neutral')	NTC	Neutral
1420	EX_4hbz_e	GSMM_262	EX_thym_e	GSMM_103	EX_diact_e	('NTC', 'Neutral')	NTC	Neutral
1421	EX_4hbz_e	GSMM_265	EX_thym_e	GSMM_103	EX_diact_e	('NTC', 'Neutral')	NTC	Neutral
1423	EX_4hbz_e	GSMM_280	EX_thym_e	GSMM_103	EX_diact_e	('NTC', 'Neutral')	NTC	Neutral
1431	EX_4hbz_e	GSMM_093	EX_glcr_e	GSMM_103	EX_diact_e	('NTC', 'Neutral')	NTC	Neutral
1436	EX_4hbz_e	GSMM_232	EX_glcr_e	GSMM_103	EX_diact_e	('NTC', 'Neutral')	NTC	Neutral
1437	EX_4hbz_e	GSMM_265	EX_glcr_e	GSMM_103	EX_diact_e	('NTC', 'Neutral')	NTC	Neutral
1449	EX_4hbz_e	GSMM_142	EX_glcn_e	GSMM_103	EX_diact_e	('NTC', 'Neutral')	NTC	Neutral
1452	EX_4hbz_e	GSMM_161	EX_glcn_e	GSMM_103	EX_diact_e	('NTC', 'Neutral')	NTC	Neutral
1455	EX_4hbz_e	GSMM_306	EX_glcn_e	GSMM_103	EX_diact_e	('NTC', 'Neutral')	NTC	Neutral
1460	EX_4hbz_e	GSMM_104	EX_enter_e	GSMM_103	EX_diact_e	('NTC', 'Neutral')	NTC	Neutral
1463	EX_4hbz_e	GSMM_220	EX_enter_e	GSMM_103	EX_diact_e	('NTC', 'Neutral')	NTC	Neutral
1465	EX_4hbz_e	GSMM_232	EX_enter_e	GSMM_103	EX_diact_e	('NTC', 'Neutral')	NTC	Neutral
1466	EX_4hbz_e	GSMM_261	EX_enter_e	GSMM_103	EX_diact_e	('NTC', 'Neutral')	NTC	Neutral
1468	EX_4hbz_e	GSMM_374	EX_enter_e	GSMM_103	EX_diact_e	('NTC', 'Neutral')	NTC	Neutral
1472	EX_4hbz_e	GSMM_104	EX_ocdcea_e	GSMM_103	EX_diact_e	('NTC', 'Neutral')	NTC	Neutral
1479	EX_4hbz_e	GSMM_093	EX_cell4_e	GSMM_103	EX_diact_e	('NTC', 'Neutral')	NTC	Neutral
1484	EX_4hbz_e	GSMM_261	EX_cell4_e	GSMM_103	EX_diact_e	('NTC', 'Neutral')	NTC	Neutral
1485	EX_4hbz_e	GSMM_262	EX_cell4_e	GSMM_103	EX_diact_e	('NTC', 'Neutral')	NTC	Neutral
1494	EX_4hbz_e	GSMM_057	EX_4abut_e	GSMM_103	EX_diact_e	('NTC', 'Neutral')	NTC	Neutral
1501	EX_4hbz_e	GSMM_261	EX_4abut_e	GSMM_103	EX_diact_e	('NTC', 'Neutral')	NTC	Neutral
1503	EX_4hbz_e	GSMM_306	EX_4abut_e	GSMM_103	EX_diact_e	('NTC', 'Neutral')	NTC	Neutral
1506	EX_4hbz_e	GSMM_024	EX_lys__L_e	GSMM_103	EX_diact_e	('NTC', 'Neutral')	NTC	Neutral
1511	EX_4hbz_e	GSMM_104	EX_lys__L_e	GSMM_103	EX_diact_e	('NTC', 'Neutral')	NTC	Neutral
1514	EX_4hbz_e	GSMM_142	EX_lys__L_e	GSMM_103	EX_diact_e	('NTC', 'Neutral')	NTC	Neutral
1517	EX_4hbz_e	GSMM_232	EX_lys__L_e	GSMM_103	EX_diact_e	('NTC', 'Neutral')	NTC	Neutral
1518	EX_4hbz_e	GSMM_262	EX_lys__L_e	GSMM_103	EX_diact_e	('NTC', 'Neutral')	NTC	Neutral
1521	EX_4hbz_e	GSMM_024	EX_indole_e	GSMM_103	EX_diact_e	('NTC', 'Neutral')	NTC	Neutral
1526	EX_4hbz_e	GSMM_104	EX_indole_e	GSMM_103	EX_diact_e	('NTC', 'Neutral')	NTC	Neutral
1530	EX_4hbz_e	GSMM_142	EX_indole_e	GSMM_103	EX_diact_e	('NTC', 'Neutral')	NTC	Neutral
1537	EX_4hbz_e	GSMM_232	EX_indole_e	GSMM_103	EX_diact_e	('NTC', 'Neutral')	NTC	Neutral
1538	EX_4hbz_e	GSMM_256	EX_indole_e	GSMM_103	EX_diact_e	('NTC', 'Neutral')	NTC	Neutral
1539	EX_4hbz_e	GSMM_262	EX_indole_e	GSMM_103	EX_diact_e	('NTC', 'Neutral')	NTC	Neutral
1540	EX_4hbz_e	GSMM_265	EX_indole_e	GSMM_103	EX_diact_e	('NTC', 'Neutral')	NTC	Neutral
1542	EX_4hbz_e	GSMM_365	EX_indole_e	GSMM_103	EX_diact_e	('NTC', 'Neutral')	NTC	Neutral
1543	EX_4hbz_e	GSMM_374	EX_indole_e	GSMM_103	EX_diact_e	('NTC', 'Neutral')	NTC	Neutral
1551	EX_4hbz_e	GSMM_024	EX_forglu_e	GSMM_103	EX_diact_e	('NTC', 'Neutral')	NTC	Neutral
1555	EX_4hbz_e	GSMM_142	EX_forglu_e	GSMM_103	EX_diact_e	('NTC', 'Neutral')	NTC	Neutral
1558	EX_4hbz_e	GSMM_024	EX_5dglcn_e	GSMM_103	EX_diact_e	('NTC', 'Neutral')	NTC	Neutral
1560	EX_4hbz_e	GSMM_104	EX_5dglcn_e	GSMM_103	EX_diact_e	('NTC', 'Neutral')	NTC	Neutral
1562	EX_4hbz_e	GSMM_225	EX_5dglcn_e	GSMM_103	EX_diact_e	('NTC', 'Neutral')	NTC	Neutral
1564	EX_4hbz_e	GSMM_232	EX_5dglcn_e	GSMM_103	EX_diact_e	('NTC', 'Neutral')	NTC	Neutral
1565	EX_4hbz_e	GSMM_261	EX_5dglcn_e	GSMM_103	EX_diact_e	('NTC', 'Neutral')	NTC	Neutral
1566	EX_4hbz_e	GSMM_265	EX_5dglcn_e	GSMM_103	EX_diact_e	('NTC', 'Neutral')	NTC	Neutral
1569	EX_4hbz_e	GSMM_365	EX_5dglcn_e	GSMM_103	EX_diact_e	('NTC', 'Neutral')	NTC	Neutral
1571	EX_4hbz_e	GSMM_024	EX_glcur_e	GSMM_103	EX_diact_e	('NTC', 'Neutral')	NTC	Neutral
1572	EX_4hbz_e	GSMM_024	EX_arg__L_e	GSMM_103	EX_diact_e	('NTC', 'Neutral')	NTC	Neutral
1574	EX_4hbz_e	GSMM_104	EX_arg__L_e	GSMM_103	EX_diact_e	('NTC', 'Neutral')	NTC	Neutral
1577	EX_4hbz_e	GSMM_142	EX_arg__L_e	GSMM_103	EX_diact_e	('NTC', 'Neutral')	NTC	Neutral
1580	EX_4hbz_e	GSMM_024	EX_d23hb_e	GSMM_103	EX_diact_e	('NTC', 'Neutral')	NTC	Neutral
1583	EX_4hbz_e	GSMM_142	EX_d23hb_e	GSMM_103	EX_diact_e	('NTC', 'Neutral')	NTC	Neutral
1587	EX_4hbz_e	GSMM_225	EX_d23hb_e	GSMM_103	EX_diact_e	('NTC', 'Neutral')	NTC	Neutral
1588	EX_4hbz_e	GSMM_256	EX_d23hb_e	GSMM_103	EX_diact_e	('NTC', 'Neutral')	NTC	Neutral
1589	EX_4hbz_e	GSMM_262	EX_d23hb_e	GSMM_103	EX_diact_e	('NTC', 'Neutral')	NTC	Neutral
1590	EX_4hbz_e	GSMM_265	EX_d23hb_e	GSMM_103	EX_diact_e	('NTC', 'Neutral')	NTC	Neutral
1593	EX_4hbz_e	GSMM_365	EX_d23hb_e	GSMM_103	EX_diact_e	('NTC', 'Neutral')	NTC	Neutral
1598	EX_4hbz_e	GSMM_057	EX_nac_e	GSMM_103	EX_diact_e	('NTC', 'Neutral')	NTC	Neutral
1599	EX_4hbz_e	GSMM_261	EX_nac_e	GSMM_103	EX_diact_e	('NTC', 'Neutral')	NTC	Neutral
1600	EX_4hbz_e	GSMM_265	EX_nac_e	GSMM_103	EX_diact_e	('NTC', 'Neutral')	NTC	Neutral
1605	EX_4hbz_e	GSMM_057	EX_leu__L_e	GSMM_103	EX_diact_e	('NTC', 'Neutral')	NTC	Neutral
1606	EX_4hbz_e	GSMM_225	EX_leu__L_e	GSMM_103	EX_diact_e	('NTC', 'Neutral')	NTC	Neutral
1613	EX_4hbz_e	GSMM_232	EX_glyb_e	GSMM_103	EX_diact_e	('NTC', 'Neutral')	NTC	Neutral
1614	EX_4hbz_e	GSMM_265	EX_glyb_e	GSMM_103	EX_diact_e	('NTC', 'Neutral')	NTC	Neutral
1620	EX_4hbz_e	GSMM_104	EX_hxan_e	GSMM_103	EX_diact_e	('NTC', 'Neutral')	NTC	Neutral
1621	EX_4hbz_e	GSMM_142	EX_hxan_e	GSMM_103	EX_diact_e	('NTC', 'Neutral')	NTC	Neutral
1624	EX_4hbz_e	GSMM_225	EX_hxan_e	GSMM_103	EX_diact_e	('NTC', 'Neutral')	NTC	Neutral
1625	EX_4hbz_e	GSMM_232	EX_hxan_e	GSMM_103	EX_diact_e	('NTC', 'Neutral')	NTC	Neutral
1627	EX_4hbz_e	GSMM_265	EX_2hxmp_e	GSMM_103	EX_diact_e	('NTC', 'Neutral')	NTC	Neutral
1628	EX_4hbz_e	GSMM_374	EX_2hxmp_e	GSMM_103	EX_diact_e	('NTC', 'Neutral')	NTC	Neutral
1630	EX_4hbz_e	GSMM_142	EX_tol_e	GSMM_103	EX_diact_e	('NTC', 'Neutral')	NTC	Neutral
1631	EX_4hbz_e	GSMM_374	EX_tol_e	GSMM_103	EX_diact_e	('NTC', 'Neutral')	NTC	Neutral
1633	EX_4hbz_e	GSMM_265	EX_lcts_e	GSMM_103	EX_diact_e	('NTC', 'Neutral')	NTC	Neutral
1634	EX_4hbz_e	GSMM_220	EX_salchs4_e	GSMM_103	EX_diact_e	('NTC', 'Neutral')	NTC	Neutral
1644	EX_4hbz_e	GSMM_024	EX_acald_e	GSMM_282	EX_ile__L_e	('NTC', 'Neutral')	NTC	Neutral
1653	EX_4hbz_e	GSMM_057	EX_acald_e	GSMM_282	EX_ile__L_e	('NTC', 'Neutral')	NTC	Neutral
1658	EX_4hbz_e	GSMM_093	EX_acald_e	GSMM_282	EX_ile__L_e	('NTC', 'Neutral')	NTC	Neutral
1660	EX_4hbz_e	GSMM_104	EX_acald_e	GSMM_282	EX_ile__L_e	('NTC', 'Neutral')	NTC	Neutral
1666	EX_4hbz_e	GSMM_142	EX_acald_e	GSMM_282	EX_ile__L_e	('NTC', 'Neutral')	NTC	Neutral
1671	EX_4hbz_e	GSMM_161	EX_acald_e	GSMM_282	EX_ile__L_e	('NTC', 'Neutral')	NTC	Neutral
1677	EX_4hbz_e	GSMM_220	EX_acald_e	GSMM_282	EX_ile__L_e	('NTC', 'Neutral')	NTC	Neutral
1678	EX_4hbz_e	GSMM_225	EX_acald_e	GSMM_282	EX_ile__L_e	('NTC', 'Neutral')	NTC	Neutral
1680	EX_4hbz_e	GSMM_232	EX_acald_e	GSMM_282	EX_ile__L_e	('NTC', 'Neutral')	NTC	Neutral
1682	EX_4hbz_e	GSMM_256	EX_acald_e	GSMM_282	EX_ile__L_e	('NTC', 'Neutral')	NTC	Neutral
1683	EX_4hbz_e	GSMM_261	EX_acald_e	GSMM_282	EX_ile__L_e	('NTC', 'Neutral')	NTC	Neutral
1684	EX_4hbz_e	GSMM_262	EX_acald_e	GSMM_282	EX_ile__L_e	('NTC', 'Neutral')	NTC	Neutral
1685	EX_4hbz_e	GSMM_265	EX_acald_e	GSMM_282	EX_ile__L_e	('NTC', 'Neutral')	NTC	Neutral
1688	EX_4hbz_e	GSMM_306	EX_acald_e	GSMM_282	EX_ile__L_e	('NTC', 'Neutral')	NTC	Neutral
1696	EX_4hbz_e	GSMM_365	EX_acald_e	GSMM_282	EX_ile__L_e	('NTC', 'Neutral')	NTC	Neutral
1697	EX_4hbz_e	GSMM_374	EX_acald_e	GSMM_282	EX_ile__L_e	('NTC', 'Neutral')	NTC	Neutral
1704	EX_4hbz_e	GSMM_024	EX_5drib_e	GSMM_282	EX_ile__L_e	('NTC', 'Neutral')	NTC	Neutral
1711	EX_4hbz_e	GSMM_057	EX_5drib_e	GSMM_282	EX_ile__L_e	('NTC', 'Neutral')	NTC	Neutral
1716	EX_4hbz_e	GSMM_093	EX_5drib_e	GSMM_282	EX_ile__L_e	('NTC', 'Neutral')	NTC	Neutral
1718	EX_4hbz_e	GSMM_104	EX_5drib_e	GSMM_282	EX_ile__L_e	('NTC', 'Neutral')	NTC	Neutral
1724	EX_4hbz_e	GSMM_142	EX_5drib_e	GSMM_282	EX_ile__L_e	('NTC', 'Neutral')	NTC	Neutral
1733	EX_4hbz_e	GSMM_220	EX_5drib_e	GSMM_282	EX_ile__L_e	('NTC', 'Neutral')	NTC	Neutral
1734	EX_4hbz_e	GSMM_225	EX_5drib_e	GSMM_282	EX_ile__L_e	('NTC', 'Neutral')	NTC	Neutral
1736	EX_4hbz_e	GSMM_232	EX_5drib_e	GSMM_282	EX_ile__L_e	('NTC', 'Neutral')	NTC	Neutral
1738	EX_4hbz_e	GSMM_256	EX_5drib_e	GSMM_282	EX_ile__L_e	('NTC', 'Neutral')	NTC	Neutral
1739	EX_4hbz_e	GSMM_261	EX_5drib_e	GSMM_282	EX_ile__L_e	('NTC', 'Neutral')	NTC	Neutral
1740	EX_4hbz_e	GSMM_262	EX_5drib_e	GSMM_282	EX_ile__L_e	('NTC', 'Neutral')	NTC	Neutral
1741	EX_4hbz_e	GSMM_265	EX_5drib_e	GSMM_282	EX_ile__L_e	('NTC', 'Neutral')	NTC	Neutral
1744	EX_4hbz_e	GSMM_306	EX_5drib_e	GSMM_282	EX_ile__L_e	('NTC', 'Neutral')	NTC	Neutral
1755	EX_4hbz_e	GSMM_365	EX_5drib_e	GSMM_282	EX_ile__L_e	('NTC', 'Neutral')	NTC	Neutral
1756	EX_4hbz_e	GSMM_374	EX_5drib_e	GSMM_282	EX_ile__L_e	('NTC', 'Neutral')	NTC	Neutral
1768	EX_4hbz_e	GSMM_104	EX_for_e	GSMM_282	EX_ile__L_e	('NTC', 'Neutral')	NTC	Neutral
1774	EX_4hbz_e	GSMM_232	EX_for_e	GSMM_282	EX_ile__L_e	('NTC', 'Neutral')	NTC	Neutral
1775	EX_4hbz_e	GSMM_256	EX_for_e	GSMM_282	EX_ile__L_e	('NTC', 'Neutral')	NTC	Neutral
1776	EX_4hbz_e	GSMM_262	EX_for_e	GSMM_282	EX_ile__L_e	('NTC', 'Neutral')	NTC	Neutral
1780	EX_4hbz_e	GSMM_365	EX_for_e	GSMM_282	EX_ile__L_e	('NTC', 'Neutral')	NTC	Neutral
1781	EX_4hbz_e	GSMM_374	EX_for_e	GSMM_282	EX_ile__L_e	('NTC', 'Neutral')	NTC	Neutral
1789	EX_4hbz_e	GSMM_024	EX_etoh_e	GSMM_282	EX_ile__L_e	('NTC', 'Neutral')	NTC	Neutral
1798	EX_4hbz_e	GSMM_057	EX_etoh_e	GSMM_282	EX_ile__L_e	('NTC', 'Neutral')	NTC	Neutral
1801	EX_4hbz_e	GSMM_093	EX_etoh_e	GSMM_282	EX_ile__L_e	('NTC', 'Neutral')	NTC	Neutral
1803	EX_4hbz_e	GSMM_104	EX_etoh_e	GSMM_282	EX_ile__L_e	('NTC', 'Neutral')	NTC	Neutral
1809	EX_4hbz_e	GSMM_142	EX_etoh_e	GSMM_282	EX_ile__L_e	('NTC', 'Neutral')	NTC	Neutral
1812	EX_4hbz_e	GSMM_161	EX_etoh_e	GSMM_282	EX_ile__L_e	('NTC', 'Neutral')	NTC	Neutral
1818	EX_4hbz_e	GSMM_220	EX_etoh_e	GSMM_282	EX_ile__L_e	('NTC', 'Neutral')	NTC	Neutral
1819	EX_4hbz_e	GSMM_225	EX_etoh_e	GSMM_282	EX_ile__L_e	('NTC', 'Neutral')	NTC	Neutral
1821	EX_4hbz_e	GSMM_232	EX_etoh_e	GSMM_282	EX_ile__L_e	('NTC', 'Neutral')	NTC	Neutral
1823	EX_4hbz_e	GSMM_256	EX_etoh_e	GSMM_282	EX_ile__L_e	('NTC', 'Neutral')	NTC	Neutral
1824	EX_4hbz_e	GSMM_261	EX_etoh_e	GSMM_282	EX_ile__L_e	('NTC', 'Neutral')	NTC	Neutral
1825	EX_4hbz_e	GSMM_262	EX_etoh_e	GSMM_282	EX_ile__L_e	('NTC', 'Neutral')	NTC	Neutral
1826	EX_4hbz_e	GSMM_265	EX_etoh_e	GSMM_282	EX_ile__L_e	('NTC', 'Neutral')	NTC	Neutral
1828	EX_4hbz_e	GSMM_280	EX_etoh_e	GSMM_282	EX_ile__L_e	('NTC', 'Neutral')	NTC	Neutral
1839	EX_4hbz_e	GSMM_365	EX_etoh_e	GSMM_282	EX_ile__L_e	('NTC', 'Neutral')	NTC	Neutral
1840	EX_4hbz_e	GSMM_374	EX_etoh_e	GSMM_282	EX_ile__L_e	('NTC', 'Neutral')	NTC	Neutral
1851	EX_4hbz_e	GSMM_104	EX_glyc3p_e	GSMM_282	EX_ile__L_e	('NTC', 'Neutral')	NTC	Neutral
1855	EX_4hbz_e	GSMM_142	EX_glyc3p_e	GSMM_282	EX_ile__L_e	('NTC', 'Neutral')	NTC	Neutral
1861	EX_4hbz_e	GSMM_220	EX_glyc3p_e	GSMM_282	EX_ile__L_e	('NTC', 'Neutral')	NTC	Neutral
1862	EX_4hbz_e	GSMM_225	EX_glyc3p_e	GSMM_282	EX_ile__L_e	('NTC', 'Neutral')	NTC	Neutral
1864	EX_4hbz_e	GSMM_256	EX_glyc3p_e	GSMM_282	EX_ile__L_e	('NTC', 'Neutral')	NTC	Neutral
1865	EX_4hbz_e	GSMM_261	EX_glyc3p_e	GSMM_282	EX_ile__L_e	('NTC', 'Neutral')	NTC	Neutral
1866	EX_4hbz_e	GSMM_262	EX_glyc3p_e	GSMM_282	EX_ile__L_e	('NTC', 'Neutral')	NTC	Neutral
1867	EX_4hbz_e	GSMM_265	EX_glyc3p_e	GSMM_282	EX_ile__L_e	('NTC', 'Neutral')	NTC	Neutral
1869	EX_4hbz_e	GSMM_280	EX_glyc3p_e	GSMM_282	EX_ile__L_e	('NTC', 'Neutral')	NTC	Neutral
1875	EX_4hbz_e	GSMM_365	EX_glyc3p_e	GSMM_282	EX_ile__L_e	('NTC', 'Neutral')	NTC	Neutral
1879	EX_4hbz_e	GSMM_024	EX_ptrc_e	GSMM_282	EX_ile__L_e	('NTC', 'Neutral')	NTC	Neutral
1887	EX_4hbz_e	GSMM_057	EX_ptrc_e	GSMM_282	EX_ile__L_e	('NTC', 'Neutral')	NTC	Neutral
1894	EX_4hbz_e	GSMM_142	EX_ptrc_e	GSMM_282	EX_ile__L_e	('NTC', 'Neutral')	NTC	Neutral
1898	EX_4hbz_e	GSMM_161	EX_ptrc_e	GSMM_282	EX_ile__L_e	('NTC', 'Neutral')	NTC	Neutral
1904	EX_4hbz_e	GSMM_220	EX_ptrc_e	GSMM_282	EX_ile__L_e	('NTC', 'Neutral')	NTC	Neutral
1905	EX_4hbz_e	GSMM_225	EX_ptrc_e	GSMM_282	EX_ile__L_e	('NTC', 'Neutral')	NTC	Neutral
1908	EX_4hbz_e	GSMM_256	EX_ptrc_e	GSMM_282	EX_ile__L_e	('NTC', 'Neutral')	NTC	Neutral
1909	EX_4hbz_e	GSMM_261	EX_ptrc_e	GSMM_282	EX_ile__L_e	('NTC', 'Neutral')	NTC	Neutral
1910	EX_4hbz_e	GSMM_262	EX_ptrc_e	GSMM_282	EX_ile__L_e	('NTC', 'Neutral')	NTC	Neutral
1912	EX_4hbz_e	GSMM_306	EX_ptrc_e	GSMM_282	EX_ile__L_e	('NTC', 'Neutral')	NTC	Neutral
1922	EX_4hbz_e	GSMM_365	EX_ptrc_e	GSMM_282	EX_ile__L_e	('NTC', 'Neutral')	NTC	Neutral
1923	EX_4hbz_e	GSMM_374	EX_ptrc_e	GSMM_282	EX_ile__L_e	('NTC', 'Neutral')	NTC	Neutral
1929	EX_4hbz_e	GSMM_024	EX_rib__D_e	GSMM_282	EX_ile__L_e	('NTC', 'Neutral')	NTC	Neutral
1936	EX_4hbz_e	GSMM_057	EX_rib__D_e	GSMM_282	EX_ile__L_e	('NTC', 'Neutral')	NTC	Neutral
1939	EX_4hbz_e	GSMM_093	EX_rib__D_e	GSMM_282	EX_ile__L_e	('NTC', 'Neutral')	NTC	Neutral
1941	EX_4hbz_e	GSMM_104	EX_rib__D_e	GSMM_282	EX_ile__L_e	('NTC', 'Neutral')	NTC	Neutral
1945	EX_4hbz_e	GSMM_142	EX_rib__D_e	GSMM_282	EX_ile__L_e	('NTC', 'Neutral')	NTC	Neutral
1952	EX_4hbz_e	GSMM_220	EX_rib__D_e	GSMM_282	EX_ile__L_e	('NTC', 'Neutral')	NTC	Neutral
1953	EX_4hbz_e	GSMM_225	EX_rib__D_e	GSMM_282	EX_ile__L_e	('NTC', 'Neutral')	NTC	Neutral
1955	EX_4hbz_e	GSMM_232	EX_rib__D_e	GSMM_282	EX_ile__L_e	('NTC', 'Neutral')	NTC	Neutral
1956	EX_4hbz_e	GSMM_256	EX_rib__D_e	GSMM_282	EX_ile__L_e	('NTC', 'Neutral')	NTC	Neutral
1957	EX_4hbz_e	GSMM_262	EX_rib__D_e	GSMM_282	EX_ile__L_e	('NTC', 'Neutral')	NTC	Neutral
1958	EX_4hbz_e	GSMM_265	EX_rib__D_e	GSMM_282	EX_ile__L_e	('NTC', 'Neutral')	NTC	Neutral
1960	EX_4hbz_e	GSMM_280	EX_rib__D_e	GSMM_282	EX_ile__L_e	('NTC', 'Neutral')	NTC	Neutral
1961	EX_4hbz_e	GSMM_306	EX_rib__D_e	GSMM_282	EX_ile__L_e	('NTC', 'Neutral')	NTC	Neutral
1973	EX_4hbz_e	GSMM_365	EX_rib__D_e	GSMM_282	EX_ile__L_e	('NTC', 'Neutral')	NTC	Neutral
1974	EX_4hbz_e	GSMM_374	EX_rib__D_e	GSMM_282	EX_ile__L_e	('NTC', 'Neutral')	NTC	Neutral
1978	EX_4hbz_e	GSMM_024	EX_actn__R_e	GSMM_282	EX_ile__L_e	('NTC', 'Neutral')	NTC	Neutral
1986	EX_4hbz_e	GSMM_104	EX_actn__R_e	GSMM_282	EX_ile__L_e	('NTC', 'Neutral')	NTC	Neutral
1993	EX_4hbz_e	GSMM_262	EX_actn__R_e	GSMM_282	EX_ile__L_e	('NTC', 'Neutral')	NTC	Neutral
1994	EX_4hbz_e	GSMM_280	EX_actn__R_e	GSMM_282	EX_ile__L_e	('NTC', 'Neutral')	NTC	Neutral
2001	EX_4hbz_e	GSMM_365	EX_actn__R_e	GSMM_282	EX_ile__L_e	('NTC', 'Neutral')	NTC	Neutral
2002	EX_4hbz_e	GSMM_374	EX_actn__R_e	GSMM_282	EX_ile__L_e	('NTC', 'Neutral')	NTC	Neutral
2009	EX_4hbz_e	GSMM_024	EX_spmd_e	GSMM_282	EX_ile__L_e	('NTC', 'Neutral')	NTC	Neutral
2021	EX_4hbz_e	GSMM_104	EX_spmd_e	GSMM_282	EX_ile__L_e	('NTC', 'Neutral')	NTC	Neutral
2026	EX_4hbz_e	GSMM_142	EX_spmd_e	GSMM_282	EX_ile__L_e	('NTC', 'Neutral')	NTC	Neutral
2030	EX_4hbz_e	GSMM_161	EX_spmd_e	GSMM_282	EX_ile__L_e	('NTC', 'Neutral')	NTC	Neutral
2035	EX_4hbz_e	GSMM_220	EX_spmd_e	GSMM_282	EX_ile__L_e	('NTC', 'Neutral')	NTC	Neutral
2036	EX_4hbz_e	GSMM_225	EX_spmd_e	GSMM_282	EX_ile__L_e	('NTC', 'Neutral')	NTC	Neutral
2038	EX_4hbz_e	GSMM_232	EX_spmd_e	GSMM_282	EX_ile__L_e	('NTC', 'Neutral')	NTC	Neutral
2039	EX_4hbz_e	GSMM_256	EX_spmd_e	GSMM_282	EX_ile__L_e	('NTC', 'Neutral')	NTC	Neutral
2040	EX_4hbz_e	GSMM_261	EX_spmd_e	GSMM_282	EX_ile__L_e	('NTC', 'Neutral')	NTC	Neutral
2041	EX_4hbz_e	GSMM_265	EX_spmd_e	GSMM_282	EX_ile__L_e	('NTC', 'Neutral')	NTC	Neutral
2049	EX_4hbz_e	GSMM_365	EX_spmd_e	GSMM_282	EX_ile__L_e	('NTC', 'Neutral')	NTC	Neutral
2050	EX_4hbz_e	GSMM_374	EX_spmd_e	GSMM_282	EX_ile__L_e	('NTC', 'Neutral')	NTC	Neutral
2059	EX_4hbz_e	GSMM_024	EX_glyc_e	GSMM_282	EX_ile__L_e	('NTC', 'Neutral')	NTC	Neutral
2068	EX_4hbz_e	GSMM_057	EX_glyc_e	GSMM_282	EX_ile__L_e	('NTC', 'Neutral')	NTC	Neutral
2072	EX_4hbz_e	GSMM_093	EX_glyc_e	GSMM_282	EX_ile__L_e	('NTC', 'Neutral')	NTC	Neutral
2074	EX_4hbz_e	GSMM_104	EX_glyc_e	GSMM_282	EX_ile__L_e	('NTC', 'Neutral')	NTC	Neutral
2084	EX_4hbz_e	GSMM_161	EX_glyc_e	GSMM_282	EX_ile__L_e	('NTC', 'Neutral')	NTC	Neutral
2090	EX_4hbz_e	GSMM_220	EX_glyc_e	GSMM_282	EX_ile__L_e	('NTC', 'Neutral')	NTC	Neutral
2091	EX_4hbz_e	GSMM_225	EX_glyc_e	GSMM_282	EX_ile__L_e	('NTC', 'Neutral')	NTC	Neutral
2093	EX_4hbz_e	GSMM_232	EX_glyc_e	GSMM_282	EX_ile__L_e	('NTC', 'Neutral')	NTC	Neutral
2095	EX_4hbz_e	GSMM_256	EX_glyc_e	GSMM_282	EX_ile__L_e	('NTC', 'Neutral')	NTC	Neutral
2096	EX_4hbz_e	GSMM_261	EX_glyc_e	GSMM_282	EX_ile__L_e	('NTC', 'Neutral')	NTC	Neutral
2097	EX_4hbz_e	GSMM_262	EX_glyc_e	GSMM_282	EX_ile__L_e	('NTC', 'Neutral')	NTC	Neutral
2098	EX_4hbz_e	GSMM_265	EX_glyc_e	GSMM_282	EX_ile__L_e	('NTC', 'Neutral')	NTC	Neutral
2101	EX_4hbz_e	GSMM_280	EX_glyc_e	GSMM_282	EX_ile__L_e	('NTC', 'Neutral')	NTC	Neutral
2113	EX_4hbz_e	GSMM_365	EX_glyc_e	GSMM_282	EX_ile__L_e	('NTC', 'Neutral')	NTC	Neutral
2114	EX_4hbz_e	GSMM_374	EX_glyc_e	GSMM_282	EX_ile__L_e	('NTC', 'Neutral')	NTC	Neutral
2123	EX_4hbz_e	GSMM_024	EX_fe3pyovd_kt_e	GSMM_282	EX_ile__L_e	('NTC', 'Neutral')	NTC	Neutral
2132	EX_4hbz_e	GSMM_057	EX_fe3pyovd_kt_e	GSMM_282	EX_ile__L_e	('NTC', 'Neutral')	NTC	Neutral
2137	EX_4hbz_e	GSMM_093	EX_fe3pyovd_kt_e	GSMM_282	EX_ile__L_e	('NTC', 'Neutral')	NTC	Neutral
2139	EX_4hbz_e	GSMM_104	EX_fe3pyovd_kt_e	GSMM_282	EX_ile__L_e	('NTC', 'Neutral')	NTC	Neutral
2145	EX_4hbz_e	GSMM_142	EX_fe3pyovd_kt_e	GSMM_282	EX_ile__L_e	('NTC', 'Neutral')	NTC	Neutral
2150	EX_4hbz_e	GSMM_161	EX_fe3pyovd_kt_e	GSMM_282	EX_ile__L_e	('NTC', 'Neutral')	NTC	Neutral
2157	EX_4hbz_e	GSMM_220	EX_fe3pyovd_kt_e	GSMM_282	EX_ile__L_e	('NTC', 'Neutral')	NTC	Neutral
2158	EX_4hbz_e	GSMM_225	EX_fe3pyovd_kt_e	GSMM_282	EX_ile__L_e	('NTC', 'Neutral')	NTC	Neutral
2160	EX_4hbz_e	GSMM_232	EX_fe3pyovd_kt_e	GSMM_282	EX_ile__L_e	('NTC', 'Neutral')	NTC	Neutral
2162	EX_4hbz_e	GSMM_256	EX_fe3pyovd_kt_e	GSMM_282	EX_ile__L_e	('NTC', 'Neutral')	NTC	Neutral
2163	EX_4hbz_e	GSMM_261	EX_fe3pyovd_kt_e	GSMM_282	EX_ile__L_e	('NTC', 'Neutral')	NTC	Neutral
2164	EX_4hbz_e	GSMM_262	EX_fe3pyovd_kt_e	GSMM_282	EX_ile__L_e	('NTC', 'Neutral')	NTC	Neutral
2165	EX_4hbz_e	GSMM_265	EX_fe3pyovd_kt_e	GSMM_282	EX_ile__L_e	('NTC', 'Neutral')	NTC	Neutral
2168	EX_4hbz_e	GSMM_280	EX_fe3pyovd_kt_e	GSMM_282	EX_ile__L_e	('NTC', 'Neutral')	NTC	Neutral
2169	EX_4hbz_e	GSMM_306	EX_fe3pyovd_kt_e	GSMM_282	EX_ile__L_e	('NTC', 'Neutral')	NTC	Neutral
2181	EX_4hbz_e	GSMM_365	EX_fe3pyovd_kt_e	GSMM_282	EX_ile__L_e	('NTC', 'Neutral')	NTC	Neutral
2182	EX_4hbz_e	GSMM_374	EX_fe3pyovd_kt_e	GSMM_282	EX_ile__L_e	('NTC', 'Neutral')	NTC	Neutral
2191	EX_4hbz_e	GSMM_024	EX_pyovd_kt_e	GSMM_282	EX_ile__L_e	('NTC', 'Neutral')	NTC	Neutral
2200	EX_4hbz_e	GSMM_057	EX_pyovd_kt_e	GSMM_282	EX_ile__L_e	('NTC', 'Neutral')	NTC	Neutral
2205	EX_4hbz_e	GSMM_093	EX_pyovd_kt_e	GSMM_282	EX_ile__L_e	('NTC', 'Neutral')	NTC	Neutral
2207	EX_4hbz_e	GSMM_104	EX_pyovd_kt_e	GSMM_282	EX_ile__L_e	('NTC', 'Neutral')	NTC	Neutral
2213	EX_4hbz_e	GSMM_142	EX_pyovd_kt_e	GSMM_282	EX_ile__L_e	('NTC', 'Neutral')	NTC	Neutral
2218	EX_4hbz_e	GSMM_161	EX_pyovd_kt_e	GSMM_282	EX_ile__L_e	('NTC', 'Neutral')	NTC	Neutral
2225	EX_4hbz_e	GSMM_220	EX_pyovd_kt_e	GSMM_282	EX_ile__L_e	('NTC', 'Neutral')	NTC	Neutral
2226	EX_4hbz_e	GSMM_225	EX_pyovd_kt_e	GSMM_282	EX_ile__L_e	('NTC', 'Neutral')	NTC	Neutral
2228	EX_4hbz_e	GSMM_232	EX_pyovd_kt_e	GSMM_282	EX_ile__L_e	('NTC', 'Neutral')	NTC	Neutral
2230	EX_4hbz_e	GSMM_256	EX_pyovd_kt_e	GSMM_282	EX_ile__L_e	('NTC', 'Neutral')	NTC	Neutral
2231	EX_4hbz_e	GSMM_261	EX_pyovd_kt_e	GSMM_282	EX_ile__L_e	('NTC', 'Neutral')	NTC	Neutral
2232	EX_4hbz_e	GSMM_262	EX_pyovd_kt_e	GSMM_282	EX_ile__L_e	('NTC', 'Neutral')	NTC	Neutral
2233	EX_4hbz_e	GSMM_265	EX_pyovd_kt_e	GSMM_282	EX_ile__L_e	('NTC', 'Neutral')	NTC	Neutral
2236	EX_4hbz_e	GSMM_280	EX_pyovd_kt_e	GSMM_282	EX_ile__L_e	('NTC', 'Neutral')	NTC	Neutral
2237	EX_4hbz_e	GSMM_306	EX_pyovd_kt_e	GSMM_282	EX_ile__L_e	('NTC', 'Neutral')	NTC	Neutral
2249	EX_4hbz_e	GSMM_365	EX_pyovd_kt_e	GSMM_282	EX_ile__L_e	('NTC', 'Neutral')	NTC	Neutral
2250	EX_4hbz_e	GSMM_374	EX_pyovd_kt_e	GSMM_282	EX_ile__L_e	('NTC', 'Neutral')	NTC	Neutral
2256	EX_4hbz_e	GSMM_104	EX_cellb_e	GSMM_282	EX_ile__L_e	('NTC', 'Neutral')	NTC	Neutral
2265	EX_4hbz_e	GSMM_024	EX_ser__L_e	GSMM_282	EX_ile__L_e	('NTC', 'Neutral')	NTC	Neutral
2271	EX_4hbz_e	GSMM_057	EX_ser__L_e	GSMM_282	EX_ile__L_e	('NTC', 'Neutral')	NTC	Neutral
2272	EX_4hbz_e	GSMM_104	EX_ser__L_e	GSMM_282	EX_ile__L_e	('NTC', 'Neutral')	NTC	Neutral
2275	EX_4hbz_e	GSMM_142	EX_ser__L_e	GSMM_282	EX_ile__L_e	('NTC', 'Neutral')	NTC	Neutral
2281	EX_4hbz_e	GSMM_220	EX_ser__L_e	GSMM_282	EX_ile__L_e	('NTC', 'Neutral')	NTC	Neutral
2282	EX_4hbz_e	GSMM_225	EX_ser__L_e	GSMM_282	EX_ile__L_e	('NTC', 'Neutral')	NTC	Neutral
2284	EX_4hbz_e	GSMM_261	EX_ser__L_e	GSMM_282	EX_ile__L_e	('NTC', 'Neutral')	NTC	Neutral
2285	EX_4hbz_e	GSMM_262	EX_ser__L_e	GSMM_282	EX_ile__L_e	('NTC', 'Neutral')	NTC	Neutral
2286	EX_4hbz_e	GSMM_265	EX_ser__L_e	GSMM_282	EX_ile__L_e	('NTC', 'Neutral')	NTC	Neutral
2288	EX_4hbz_e	GSMM_280	EX_ser__L_e	GSMM_282	EX_ile__L_e	('NTC', 'Neutral')	NTC	Neutral
2295	EX_4hbz_e	GSMM_365	EX_ser__L_e	GSMM_282	EX_ile__L_e	('NTC', 'Neutral')	NTC	Neutral
2308	EX_4hbz_e	GSMM_104	EX_oxa_e	GSMM_282	EX_ile__L_e	('NTC', 'Neutral')	NTC	Neutral
2312	EX_4hbz_e	GSMM_142	EX_oxa_e	GSMM_282	EX_ile__L_e	('NTC', 'Neutral')	NTC	Neutral
2314	EX_4hbz_e	GSMM_161	EX_oxa_e	GSMM_282	EX_ile__L_e	('NTC', 'Neutral')	NTC	Neutral
2318	EX_4hbz_e	GSMM_220	EX_oxa_e	GSMM_282	EX_ile__L_e	('NTC', 'Neutral')	NTC	Neutral
2319	EX_4hbz_e	GSMM_225	EX_oxa_e	GSMM_282	EX_ile__L_e	('NTC', 'Neutral')	NTC	Neutral
2320	EX_4hbz_e	GSMM_232	EX_oxa_e	GSMM_282	EX_ile__L_e	('NTC', 'Neutral')	NTC	Neutral
2321	EX_4hbz_e	GSMM_265	EX_oxa_e	GSMM_282	EX_ile__L_e	('NTC', 'Neutral')	NTC	Neutral
2322	EX_4hbz_e	GSMM_280	EX_oxa_e	GSMM_282	EX_ile__L_e	('NTC', 'Neutral')	NTC	Neutral
2323	EX_4hbz_e	GSMM_306	EX_oxa_e	GSMM_282	EX_ile__L_e	('NTC', 'Neutral')	NTC	Neutral
2328	EX_4hbz_e	GSMM_365	EX_oxa_e	GSMM_282	EX_ile__L_e	('NTC', 'Neutral')	NTC	Neutral
2335	EX_4hbz_e	GSMM_024	EX_urea_e	GSMM_282	EX_ile__L_e	('NTC', 'Neutral')	NTC	Neutral
2344	EX_4hbz_e	GSMM_057	EX_urea_e	GSMM_282	EX_ile__L_e	('NTC', 'Neutral')	NTC	Neutral
2347	EX_4hbz_e	GSMM_093	EX_urea_e	GSMM_282	EX_ile__L_e	('NTC', 'Neutral')	NTC	Neutral
2349	EX_4hbz_e	GSMM_104	EX_urea_e	GSMM_282	EX_ile__L_e	('NTC', 'Neutral')	NTC	Neutral
2356	EX_4hbz_e	GSMM_161	EX_urea_e	GSMM_282	EX_ile__L_e	('NTC', 'Neutral')	NTC	Neutral
2361	EX_4hbz_e	GSMM_220	EX_urea_e	GSMM_282	EX_ile__L_e	('NTC', 'Neutral')	NTC	Neutral
2362	EX_4hbz_e	GSMM_232	EX_urea_e	GSMM_282	EX_ile__L_e	('NTC', 'Neutral')	NTC	Neutral
2364	EX_4hbz_e	GSMM_256	EX_urea_e	GSMM_282	EX_ile__L_e	('NTC', 'Neutral')	NTC	Neutral
2365	EX_4hbz_e	GSMM_261	EX_urea_e	GSMM_282	EX_ile__L_e	('NTC', 'Neutral')	NTC	Neutral
2366	EX_4hbz_e	GSMM_262	EX_urea_e	GSMM_282	EX_ile__L_e	('NTC', 'Neutral')	NTC	Neutral
2367	EX_4hbz_e	GSMM_265	EX_urea_e	GSMM_282	EX_ile__L_e	('NTC', 'Neutral')	NTC	Neutral
2370	EX_4hbz_e	GSMM_280	EX_urea_e	GSMM_282	EX_ile__L_e	('NTC', 'Neutral')	NTC	Neutral
2371	EX_4hbz_e	GSMM_306	EX_urea_e	GSMM_282	EX_ile__L_e	('NTC', 'Neutral')	NTC	Neutral
2382	EX_4hbz_e	GSMM_365	EX_urea_e	GSMM_282	EX_ile__L_e	('NTC', 'Neutral')	NTC	Neutral
2383	EX_4hbz_e	GSMM_374	EX_urea_e	GSMM_282	EX_ile__L_e	('NTC', 'Neutral')	NTC	Neutral
2394	EX_4hbz_e	GSMM_093	EX_inost_e	GSMM_282	EX_ile__L_e	('NTC', 'Neutral')	NTC	Neutral
2398	EX_4hbz_e	GSMM_142	EX_inost_e	GSMM_282	EX_ile__L_e	('NTC', 'Neutral')	NTC	Neutral
2405	EX_4hbz_e	GSMM_225	EX_inost_e	GSMM_282	EX_ile__L_e	('NTC', 'Neutral')	NTC	Neutral
2407	EX_4hbz_e	GSMM_265	EX_inost_e	GSMM_282	EX_ile__L_e	('NTC', 'Neutral')	NTC	Neutral
2420	EX_4hbz_e	GSMM_104	EX_chol_e	GSMM_282	EX_ile__L_e	('NTC', 'Neutral')	NTC	Neutral
2423	EX_4hbz_e	GSMM_142	EX_chol_e	GSMM_282	EX_ile__L_e	('NTC', 'Neutral')	NTC	Neutral
2429	EX_4hbz_e	GSMM_220	EX_chol_e	GSMM_282	EX_ile__L_e	('NTC', 'Neutral')	NTC	Neutral
2430	EX_4hbz_e	GSMM_225	EX_chol_e	GSMM_282	EX_ile__L_e	('NTC', 'Neutral')	NTC	Neutral
2432	EX_4hbz_e	GSMM_256	EX_chol_e	GSMM_282	EX_ile__L_e	('NTC', 'Neutral')	NTC	Neutral
2433	EX_4hbz_e	GSMM_261	EX_chol_e	GSMM_282	EX_ile__L_e	('NTC', 'Neutral')	NTC	Neutral
2434	EX_4hbz_e	GSMM_262	EX_chol_e	GSMM_282	EX_ile__L_e	('NTC', 'Neutral')	NTC	Neutral
2435	EX_4hbz_e	GSMM_265	EX_chol_e	GSMM_282	EX_ile__L_e	('NTC', 'Neutral')	NTC	Neutral
2437	EX_4hbz_e	GSMM_280	EX_chol_e	GSMM_282	EX_ile__L_e	('NTC', 'Neutral')	NTC	Neutral
2446	EX_4hbz_e	GSMM_365	EX_chol_e	GSMM_282	EX_ile__L_e	('NTC', 'Neutral')	NTC	Neutral
2451	EX_4hbz_e	GSMM_057	EX_glyald_e	GSMM_282	EX_ile__L_e	('NTC', 'Neutral')	NTC	Neutral
2453	EX_4hbz_e	GSMM_093	EX_glyald_e	GSMM_282	EX_ile__L_e	('NTC', 'Neutral')	NTC	Neutral
2460	EX_4hbz_e	GSMM_161	EX_glyald_e	GSMM_282	EX_ile__L_e	('NTC', 'Neutral')	NTC	Neutral
2465	EX_4hbz_e	GSMM_220	EX_glyald_e	GSMM_282	EX_ile__L_e	('NTC', 'Neutral')	NTC	Neutral
2467	EX_4hbz_e	GSMM_256	EX_glyald_e	GSMM_282	EX_ile__L_e	('NTC', 'Neutral')	NTC	Neutral
2468	EX_4hbz_e	GSMM_261	EX_glyald_e	GSMM_282	EX_ile__L_e	('NTC', 'Neutral')	NTC	Neutral
2469	EX_4hbz_e	GSMM_265	EX_glyald_e	GSMM_282	EX_ile__L_e	('NTC', 'Neutral')	NTC	Neutral
2472	EX_4hbz_e	GSMM_306	EX_glyald_e	GSMM_282	EX_ile__L_e	('NTC', 'Neutral')	NTC	Neutral
2477	EX_4hbz_e	GSMM_374	EX_glyald_e	GSMM_282	EX_ile__L_e	('NTC', 'Neutral')	NTC	Neutral
2482	EX_4hbz_e	GSMM_024	EX_ch4s_e	GSMM_282	EX_ile__L_e	('NTC', 'Neutral')	NTC	Neutral
2487	EX_4hbz_e	GSMM_093	EX_ch4s_e	GSMM_282	EX_ile__L_e	('NTC', 'Neutral')	NTC	Neutral
2488	EX_4hbz_e	GSMM_104	EX_ch4s_e	GSMM_282	EX_ile__L_e	('NTC', 'Neutral')	NTC	Neutral
2490	EX_4hbz_e	GSMM_142	EX_ch4s_e	GSMM_282	EX_ile__L_e	('NTC', 'Neutral')	NTC	Neutral
2495	EX_4hbz_e	GSMM_220	EX_ch4s_e	GSMM_282	EX_ile__L_e	('NTC', 'Neutral')	NTC	Neutral
2496	EX_4hbz_e	GSMM_225	EX_ch4s_e	GSMM_282	EX_ile__L_e	('NTC', 'Neutral')	NTC	Neutral
2497	EX_4hbz_e	GSMM_262	EX_ch4s_e	GSMM_282	EX_ile__L_e	('NTC', 'Neutral')	NTC	Neutral
2498	EX_4hbz_e	GSMM_265	EX_ch4s_e	GSMM_282	EX_ile__L_e	('NTC', 'Neutral')	NTC	Neutral
2501	EX_4hbz_e	GSMM_306	EX_ch4s_e	GSMM_282	EX_ile__L_e	('NTC', 'Neutral')	NTC	Neutral
2508	EX_4hbz_e	GSMM_365	EX_ch4s_e	GSMM_282	EX_ile__L_e	('NTC', 'Neutral')	NTC	Neutral
2512	EX_4hbz_e	GSMM_024	EX_gal_e	GSMM_282	EX_ile__L_e	('NTC', 'Neutral')	NTC	Neutral
2518	EX_4hbz_e	GSMM_057	EX_gal_e	GSMM_282	EX_ile__L_e	('NTC', 'Neutral')	NTC	Neutral
2522	EX_4hbz_e	GSMM_104	EX_gal_e	GSMM_282	EX_ile__L_e	('NTC', 'Neutral')	NTC	Neutral
2527	EX_4hbz_e	GSMM_142	EX_gal_e	GSMM_282	EX_ile__L_e	('NTC', 'Neutral')	NTC	Neutral
2532	EX_4hbz_e	GSMM_220	EX_gal_e	GSMM_282	EX_ile__L_e	('NTC', 'Neutral')	NTC	Neutral
2533	EX_4hbz_e	GSMM_225	EX_gal_e	GSMM_282	EX_ile__L_e	('NTC', 'Neutral')	NTC	Neutral
2535	EX_4hbz_e	GSMM_232	EX_gal_e	GSMM_282	EX_ile__L_e	('NTC', 'Neutral')	NTC	Neutral
2537	EX_4hbz_e	GSMM_256	EX_gal_e	GSMM_282	EX_ile__L_e	('NTC', 'Neutral')	NTC	Neutral
2538	EX_4hbz_e	GSMM_262	EX_gal_e	GSMM_282	EX_ile__L_e	('NTC', 'Neutral')	NTC	Neutral
2539	EX_4hbz_e	GSMM_265	EX_gal_e	GSMM_282	EX_ile__L_e	('NTC', 'Neutral')	NTC	Neutral
2549	EX_4hbz_e	GSMM_365	EX_gal_e	GSMM_282	EX_ile__L_e	('NTC', 'Neutral')	NTC	Neutral
2557	EX_4hbz_e	GSMM_104	EX_gua_e	GSMM_282	EX_ile__L_e	('NTC', 'Neutral')	NTC	Neutral
2561	EX_4hbz_e	GSMM_220	EX_gua_e	GSMM_282	EX_ile__L_e	('NTC', 'Neutral')	NTC	Neutral
2562	EX_4hbz_e	GSMM_225	EX_gua_e	GSMM_282	EX_ile__L_e	('NTC', 'Neutral')	NTC	Neutral
2563	EX_4hbz_e	GSMM_232	EX_gua_e	GSMM_282	EX_ile__L_e	('NTC', 'Neutral')	NTC	Neutral
2564	EX_4hbz_e	GSMM_262	EX_gua_e	GSMM_282	EX_ile__L_e	('NTC', 'Neutral')	NTC	Neutral
2565	EX_4hbz_e	GSMM_265	EX_gua_e	GSMM_282	EX_ile__L_e	('NTC', 'Neutral')	NTC	Neutral
2573	EX_4hbz_e	GSMM_093	EX_asp__D_e	GSMM_282	EX_ile__L_e	('NTC', 'Neutral')	NTC	Neutral
2575	EX_4hbz_e	GSMM_280	EX_asp__D_e	GSMM_282	EX_ile__L_e	('NTC', 'Neutral')	NTC	Neutral
2583	EX_4hbz_e	GSMM_093	EX_meoh_e	GSMM_282	EX_ile__L_e	('NTC', 'Neutral')	NTC	Neutral
2587	EX_4hbz_e	GSMM_142	EX_meoh_e	GSMM_282	EX_ile__L_e	('NTC', 'Neutral')	NTC	Neutral
2589	EX_4hbz_e	GSMM_161	EX_meoh_e	GSMM_282	EX_ile__L_e	('NTC', 'Neutral')	NTC	Neutral
2593	EX_4hbz_e	GSMM_225	EX_meoh_e	GSMM_282	EX_ile__L_e	('NTC', 'Neutral')	NTC	Neutral
2594	EX_4hbz_e	GSMM_232	EX_meoh_e	GSMM_282	EX_ile__L_e	('NTC', 'Neutral')	NTC	Neutral
2595	EX_4hbz_e	GSMM_261	EX_meoh_e	GSMM_282	EX_ile__L_e	('NTC', 'Neutral')	NTC	Neutral
2596	EX_4hbz_e	GSMM_262	EX_meoh_e	GSMM_282	EX_ile__L_e	('NTC', 'Neutral')	NTC	Neutral
2597	EX_4hbz_e	GSMM_265	EX_meoh_e	GSMM_282	EX_ile__L_e	('NTC', 'Neutral')	NTC	Neutral
2598	EX_4hbz_e	GSMM_306	EX_meoh_e	GSMM_282	EX_ile__L_e	('NTC', 'Neutral')	NTC	Neutral
2610	EX_4hbz_e	GSMM_024	EX_orn_e	GSMM_282	EX_ile__L_e	('NTC', 'Neutral')	NTC	Neutral
2615	EX_4hbz_e	GSMM_093	EX_orn_e	GSMM_282	EX_ile__L_e	('NTC', 'Neutral')	NTC	Neutral
2616	EX_4hbz_e	GSMM_104	EX_orn_e	GSMM_282	EX_ile__L_e	('NTC', 'Neutral')	NTC	Neutral
2620	EX_4hbz_e	GSMM_142	EX_orn_e	GSMM_282	EX_ile__L_e	('NTC', 'Neutral')	NTC	Neutral
2623	EX_4hbz_e	GSMM_161	EX_orn_e	GSMM_282	EX_ile__L_e	('NTC', 'Neutral')	NTC	Neutral
2628	EX_4hbz_e	GSMM_256	EX_orn_e	GSMM_282	EX_ile__L_e	('NTC', 'Neutral')	NTC	Neutral
2629	EX_4hbz_e	GSMM_261	EX_orn_e	GSMM_282	EX_ile__L_e	('NTC', 'Neutral')	NTC	Neutral
2630	EX_4hbz_e	GSMM_262	EX_orn_e	GSMM_282	EX_ile__L_e	('NTC', 'Neutral')	NTC	Neutral
2632	EX_4hbz_e	GSMM_306	EX_orn_e	GSMM_282	EX_ile__L_e	('NTC', 'Neutral')	NTC	Neutral
2638	EX_4hbz_e	GSMM_365	EX_orn_e	GSMM_282	EX_ile__L_e	('NTC', 'Neutral')	NTC	Neutral
2639	EX_4hbz_e	GSMM_374	EX_orn_e	GSMM_282	EX_ile__L_e	('NTC', 'Neutral')	NTC	Neutral
2649	EX_4hbz_e	GSMM_142	EX_gthrd_e	GSMM_282	EX_ile__L_e	('NTC', 'Neutral')	NTC	Neutral
2653	EX_4hbz_e	GSMM_265	EX_gthrd_e	GSMM_282	EX_ile__L_e	('NTC', 'Neutral')	NTC	Neutral
2655	EX_4hbz_e	GSMM_280	EX_gthrd_e	GSMM_282	EX_ile__L_e	('NTC', 'Neutral')	NTC	Neutral
2656	EX_4hbz_e	GSMM_306	EX_gthrd_e	GSMM_282	EX_ile__L_e	('NTC', 'Neutral')	NTC	Neutral
2658	EX_4hbz_e	GSMM_365	EX_gthrd_e	GSMM_282	EX_ile__L_e	('NTC', 'Neutral')	NTC	Neutral
2667	EX_4hbz_e	GSMM_142	EX_pea_e	GSMM_282	EX_ile__L_e	('NTC', 'Neutral')	NTC	Neutral
2669	EX_4hbz_e	GSMM_225	EX_pea_e	GSMM_282	EX_ile__L_e	('NTC', 'Neutral')	NTC	Neutral
2670	EX_4hbz_e	GSMM_265	EX_pea_e	GSMM_282	EX_ile__L_e	('NTC', 'Neutral')	NTC	Neutral
2673	EX_4hbz_e	GSMM_374	EX_pea_e	GSMM_282	EX_ile__L_e	('NTC', 'Neutral')	NTC	Neutral
2685	EX_4hbz_e	GSMM_232	EX_glu__L_e	GSMM_282	EX_ile__L_e	('NTC', 'Neutral')	NTC	Neutral
2686	EX_4hbz_e	GSMM_256	EX_glu__L_e	GSMM_282	EX_ile__L_e	('NTC', 'Neutral')	NTC	Neutral
2687	EX_4hbz_e	GSMM_262	EX_glu__L_e	GSMM_282	EX_ile__L_e	('NTC', 'Neutral')	NTC	Neutral
2688	EX_4hbz_e	GSMM_265	EX_glu__L_e	GSMM_282	EX_ile__L_e	('NTC', 'Neutral')	NTC	Neutral
2689	EX_4hbz_e	GSMM_280	EX_glu__L_e	GSMM_282	EX_ile__L_e	('NTC', 'Neutral')	NTC	Neutral
2690	EX_4hbz_e	GSMM_306	EX_glu__L_e	GSMM_282	EX_ile__L_e	('NTC', 'Neutral')	NTC	Neutral
2693	EX_4hbz_e	GSMM_365	EX_glu__L_e	GSMM_282	EX_ile__L_e	('NTC', 'Neutral')	NTC	Neutral
2694	EX_4hbz_e	GSMM_374	EX_glu__L_e	GSMM_282	EX_ile__L_e	('NTC', 'Neutral')	NTC	Neutral
2710	EX_4hbz_e	GSMM_232	EX_cgly_e	GSMM_282	EX_ile__L_e	('NTC', 'Neutral')	NTC	Neutral
2711	EX_4hbz_e	GSMM_256	EX_cgly_e	GSMM_282	EX_ile__L_e	('NTC', 'Neutral')	NTC	Neutral
2712	EX_4hbz_e	GSMM_265	EX_cgly_e	GSMM_282	EX_ile__L_e	('NTC', 'Neutral')	NTC	Neutral
2714	EX_4hbz_e	GSMM_280	EX_cgly_e	GSMM_282	EX_ile__L_e	('NTC', 'Neutral')	NTC	Neutral
2715	EX_4hbz_e	GSMM_306	EX_cgly_e	GSMM_282	EX_ile__L_e	('NTC', 'Neutral')	NTC	Neutral
2719	EX_4hbz_e	GSMM_365	EX_cgly_e	GSMM_282	EX_ile__L_e	('NTC', 'Neutral')	NTC	Neutral
2720	EX_4hbz_e	GSMM_374	EX_cgly_e	GSMM_282	EX_ile__L_e	('NTC', 'Neutral')	NTC	Neutral
2726	EX_4hbz_e	GSMM_057	EX_glc__D_e	GSMM_282	EX_ile__L_e	('NTC', 'Neutral')	NTC	Neutral
2730	EX_4hbz_e	GSMM_142	EX_glc__D_e	GSMM_282	EX_ile__L_e	('NTC', 'Neutral')	NTC	Neutral
2737	EX_4hbz_e	GSMM_225	EX_glc__D_e	GSMM_282	EX_ile__L_e	('NTC', 'Neutral')	NTC	Neutral
2740	EX_4hbz_e	GSMM_262	EX_glc__D_e	GSMM_282	EX_ile__L_e	('NTC', 'Neutral')	NTC	Neutral
2741	EX_4hbz_e	GSMM_265	EX_glc__D_e	GSMM_282	EX_ile__L_e	('NTC', 'Neutral')	NTC	Neutral
2743	EX_4hbz_e	GSMM_306	EX_glc__D_e	GSMM_282	EX_ile__L_e	('NTC', 'Neutral')	NTC	Neutral
2752	EX_4hbz_e	GSMM_365	EX_glc__D_e	GSMM_282	EX_ile__L_e	('NTC', 'Neutral')	NTC	Neutral
2753	EX_4hbz_e	GSMM_374	EX_glc__D_e	GSMM_282	EX_ile__L_e	('NTC', 'Neutral')	NTC	Neutral
2760	EX_4hbz_e	GSMM_261	EX_hom__L_e	GSMM_282	EX_ile__L_e	('NTC', 'Neutral')	NTC	Neutral
2761	EX_4hbz_e	GSMM_306	EX_hom__L_e	GSMM_282	EX_ile__L_e	('NTC', 'Neutral')	NTC	Neutral
2763	EX_4hbz_e	GSMM_365	EX_hom__L_e	GSMM_282	EX_ile__L_e	('NTC', 'Neutral')	NTC	Neutral
2767	EX_4hbz_e	GSMM_024	EX_cys__L_e	GSMM_282	EX_ile__L_e	('NTC', 'Neutral')	NTC	Neutral
2769	EX_4hbz_e	GSMM_057	EX_cys__L_e	GSMM_282	EX_ile__L_e	('NTC', 'Neutral')	NTC	Neutral
2778	EX_4hbz_e	GSMM_220	EX_cys__L_e	GSMM_282	EX_ile__L_e	('NTC', 'Neutral')	NTC	Neutral
2779	EX_4hbz_e	GSMM_256	EX_cys__L_e	GSMM_282	EX_ile__L_e	('NTC', 'Neutral')	NTC	Neutral
2781	EX_4hbz_e	GSMM_306	EX_cys__L_e	GSMM_282	EX_ile__L_e	('NTC', 'Neutral')	NTC	Neutral
2789	EX_4hbz_e	GSMM_374	EX_cys__L_e	GSMM_282	EX_ile__L_e	('NTC', 'Neutral')	NTC	Neutral
2793	EX_4hbz_e	GSMM_024	EX_pheme_e	GSMM_282	EX_ile__L_e	('NTC', 'Neutral')	NTC	Neutral
2795	EX_4hbz_e	GSMM_057	EX_pheme_e	GSMM_282	EX_ile__L_e	('NTC', 'Neutral')	NTC	Neutral
2800	EX_4hbz_e	GSMM_093	EX_pheme_e	GSMM_282	EX_ile__L_e	('NTC', 'Neutral')	NTC	Neutral
2804	EX_4hbz_e	GSMM_142	EX_pheme_e	GSMM_282	EX_ile__L_e	('NTC', 'Neutral')	NTC	Neutral
2810	EX_4hbz_e	GSMM_232	EX_pheme_e	GSMM_282	EX_ile__L_e	('NTC', 'Neutral')	NTC	Neutral
2811	EX_4hbz_e	GSMM_265	EX_pheme_e	GSMM_282	EX_ile__L_e	('NTC', 'Neutral')	NTC	Neutral
2822	EX_4hbz_e	GSMM_024	EX_g3pe_e	GSMM_282	EX_ile__L_e	('NTC', 'Neutral')	NTC	Neutral
2827	EX_4hbz_e	GSMM_093	EX_g3pe_e	GSMM_282	EX_ile__L_e	('NTC', 'Neutral')	NTC	Neutral
2829	EX_4hbz_e	GSMM_161	EX_g3pe_e	GSMM_282	EX_ile__L_e	('NTC', 'Neutral')	NTC	Neutral
2836	EX_4hbz_e	GSMM_365	EX_g3pe_e	GSMM_282	EX_ile__L_e	('NTC', 'Neutral')	NTC	Neutral
2846	EX_4hbz_e	GSMM_142	EX_glcn_e	GSMM_282	EX_ile__L_e	('NTC', 'Neutral')	NTC	Neutral
2849	EX_4hbz_e	GSMM_161	EX_glcn_e	GSMM_282	EX_ile__L_e	('NTC', 'Neutral')	NTC	Neutral
2852	EX_4hbz_e	GSMM_306	EX_glcn_e	GSMM_282	EX_ile__L_e	('NTC', 'Neutral')	NTC	Neutral
2857	EX_4hbz_e	GSMM_104	EX_enter_e	GSMM_282	EX_ile__L_e	('NTC', 'Neutral')	NTC	Neutral
2860	EX_4hbz_e	GSMM_220	EX_enter_e	GSMM_282	EX_ile__L_e	('NTC', 'Neutral')	NTC	Neutral
2862	EX_4hbz_e	GSMM_232	EX_enter_e	GSMM_282	EX_ile__L_e	('NTC', 'Neutral')	NTC	Neutral
2863	EX_4hbz_e	GSMM_261	EX_enter_e	GSMM_282	EX_ile__L_e	('NTC', 'Neutral')	NTC	Neutral
2865	EX_4hbz_e	GSMM_374	EX_enter_e	GSMM_282	EX_ile__L_e	('NTC', 'Neutral')	NTC	Neutral
2870	EX_4hbz_e	GSMM_057	EX_4abut_e	GSMM_282	EX_ile__L_e	('NTC', 'Neutral')	NTC	Neutral
2877	EX_4hbz_e	GSMM_261	EX_4abut_e	GSMM_282	EX_ile__L_e	('NTC', 'Neutral')	NTC	Neutral
2879	EX_4hbz_e	GSMM_306	EX_4abut_e	GSMM_282	EX_ile__L_e	('NTC', 'Neutral')	NTC	Neutral
2882	EX_4hbz_e	GSMM_024	EX_lys__L_e	GSMM_282	EX_ile__L_e	('NTC', 'Neutral')	NTC	Neutral
2887	EX_4hbz_e	GSMM_104	EX_lys__L_e	GSMM_282	EX_ile__L_e	('NTC', 'Neutral')	NTC	Neutral
2890	EX_4hbz_e	GSMM_142	EX_lys__L_e	GSMM_282	EX_ile__L_e	('NTC', 'Neutral')	NTC	Neutral
2893	EX_4hbz_e	GSMM_232	EX_lys__L_e	GSMM_282	EX_ile__L_e	('NTC', 'Neutral')	NTC	Neutral
2894	EX_4hbz_e	GSMM_262	EX_lys__L_e	GSMM_282	EX_ile__L_e	('NTC', 'Neutral')	NTC	Neutral
2897	EX_4hbz_e	GSMM_256	EX_agm_e	GSMM_282	EX_ile__L_e	('NTC', 'Neutral')	NTC	Neutral
2904	EX_4hbz_e	GSMM_024	EX_5dglcn_e	GSMM_282	EX_ile__L_e	('NTC', 'Neutral')	NTC	Neutral
2906	EX_4hbz_e	GSMM_104	EX_5dglcn_e	GSMM_282	EX_ile__L_e	('NTC', 'Neutral')	NTC	Neutral
2908	EX_4hbz_e	GSMM_225	EX_5dglcn_e	GSMM_282	EX_ile__L_e	('NTC', 'Neutral')	NTC	Neutral
2910	EX_4hbz_e	GSMM_232	EX_5dglcn_e	GSMM_282	EX_ile__L_e	('NTC', 'Neutral')	NTC	Neutral
2911	EX_4hbz_e	GSMM_261	EX_5dglcn_e	GSMM_282	EX_ile__L_e	('NTC', 'Neutral')	NTC	Neutral
2912	EX_4hbz_e	GSMM_265	EX_5dglcn_e	GSMM_282	EX_ile__L_e	('NTC', 'Neutral')	NTC	Neutral
2915	EX_4hbz_e	GSMM_365	EX_5dglcn_e	GSMM_282	EX_ile__L_e	('NTC', 'Neutral')	NTC	Neutral
2917	EX_4hbz_e	GSMM_024	EX_g3pg_e	GSMM_282	EX_ile__L_e	('NTC', 'Neutral')	NTC	Neutral
2919	EX_4hbz_e	GSMM_024	EX_arg__L_e	GSMM_282	EX_ile__L_e	('NTC', 'Neutral')	NTC	Neutral
2921	EX_4hbz_e	GSMM_104	EX_arg__L_e	GSMM_282	EX_ile__L_e	('NTC', 'Neutral')	NTC	Neutral
2924	EX_4hbz_e	GSMM_142	EX_arg__L_e	GSMM_282	EX_ile__L_e	('NTC', 'Neutral')	NTC	Neutral
2931	EX_4hbz_e	GSMM_057	EX_nac_e	GSMM_282	EX_ile__L_e	('NTC', 'Neutral')	NTC	Neutral
2932	EX_4hbz_e	GSMM_261	EX_nac_e	GSMM_282	EX_ile__L_e	('NTC', 'Neutral')	NTC	Neutral
2933	EX_4hbz_e	GSMM_265	EX_nac_e	GSMM_282	EX_ile__L_e	('NTC', 'Neutral')	NTC	Neutral
2938	EX_4hbz_e	GSMM_225	EX_orn__L_e	GSMM_282	EX_ile__L_e	('NTC', 'Neutral')	NTC	Neutral
2940	EX_4hbz_e	GSMM_104	EX_btd_RR_e	GSMM_282	EX_ile__L_e	('NTC', 'Neutral')	NTC	Neutral
2942	EX_4hbz_e	GSMM_057	EX_leu__L_e	GSMM_282	EX_ile__L_e	('NTC', 'Neutral')	NTC	Neutral
2943	EX_4hbz_e	GSMM_225	EX_leu__L_e	GSMM_282	EX_ile__L_e	('NTC', 'Neutral')	NTC	Neutral
2948	EX_4hbz_e	GSMM_093	EX_adn_e	GSMM_282	EX_ile__L_e	('NTC', 'Neutral')	NTC	Neutral
2954	EX_4hbz_e	GSMM_365	EX_adn_e	GSMM_282	EX_ile__L_e	('NTC', 'Neutral')	NTC	Neutral
2956	EX_4hbz_e	GSMM_093	EX_gsn_e	GSMM_282	EX_ile__L_e	('NTC', 'Neutral')	NTC	Neutral
2957	EX_4hbz_e	GSMM_142	EX_gsn_e	GSMM_282	EX_ile__L_e	('NTC', 'Neutral')	NTC	Neutral
2962	EX_4hbz_e	GSMM_365	EX_gsn_e	GSMM_282	EX_ile__L_e	('NTC', 'Neutral')	NTC	Neutral
2966	EX_4hbz_e	GSMM_232	EX_glyb_e	GSMM_282	EX_ile__L_e	('NTC', 'Neutral')	NTC	Neutral
2967	EX_4hbz_e	GSMM_265	EX_glyb_e	GSMM_282	EX_ile__L_e	('NTC', 'Neutral')	NTC	Neutral
2979	EX_4hbz_e	GSMM_093	EX_thymd_e	GSMM_282	EX_ile__L_e	('NTC', 'Neutral')	NTC	Neutral
2981	EX_4hbz_e	GSMM_261	EX_thymd_e	GSMM_282	EX_ile__L_e	('NTC', 'Neutral')	NTC	Neutral
2989	EX_4hbz_e	GSMM_232	EX_man1p_e	GSMM_282	EX_ile__L_e	('NTC', 'Neutral')	NTC	Neutral
2991	EX_4hbz_e	GSMM_265	EX_2hxmp_e	GSMM_282	EX_ile__L_e	('NTC', 'Neutral')	NTC	Neutral
2992	EX_4hbz_e	GSMM_374	EX_2hxmp_e	GSMM_282	EX_ile__L_e	('NTC', 'Neutral')	NTC	Neutral
2995	EX_4hbz_e	GSMM_265	EX_lcts_e	GSMM_282	EX_ile__L_e	('NTC', 'Neutral')	NTC	Neutral
3006	EX_4hbz_e	GSMM_024	EX_acald_e	GSMM_259	EX_g6p_B_e	('NTC', 'NTC')	NTC	NTC
3015	EX_4hbz_e	GSMM_057	EX_acald_e	GSMM_259	EX_g6p_B_e	('NTC', 'NTC')	NTC	NTC
3020	EX_4hbz_e	GSMM_093	EX_acald_e	GSMM_259	EX_g6p_B_e	('NTC', 'NTC')	NTC	NTC
3022	EX_4hbz_e	GSMM_104	EX_acald_e	GSMM_259	EX_g6p_B_e	('NTC', 'NTC')	NTC	NTC
3028	EX_4hbz_e	GSMM_142	EX_acald_e	GSMM_259	EX_g6p_B_e	('NTC', 'NTC')	NTC	NTC
3033	EX_4hbz_e	GSMM_161	EX_acald_e	GSMM_259	EX_g6p_B_e	('NTC', 'NTC')	NTC	NTC
3039	EX_4hbz_e	GSMM_220	EX_acald_e	GSMM_259	EX_g6p_B_e	('NTC', 'NTC')	NTC	NTC
3040	EX_4hbz_e	GSMM_225	EX_acald_e	GSMM_259	EX_g6p_B_e	('NTC', 'NTC')	NTC	NTC
3042	EX_4hbz_e	GSMM_232	EX_acald_e	GSMM_259	EX_g6p_B_e	('NTC', 'NTC')	NTC	NTC
3044	EX_4hbz_e	GSMM_256	EX_acald_e	GSMM_259	EX_g6p_B_e	('NTC', 'NTC')	NTC	NTC
3045	EX_4hbz_e	GSMM_261	EX_acald_e	GSMM_259	EX_g6p_B_e	('NTC', 'NTC')	NTC	NTC
3046	EX_4hbz_e	GSMM_262	EX_acald_e	GSMM_259	EX_g6p_B_e	('NTC', 'NTC')	NTC	NTC
3047	EX_4hbz_e	GSMM_265	EX_acald_e	GSMM_259	EX_g6p_B_e	('NTC', 'NTC')	NTC	NTC
3050	EX_4hbz_e	GSMM_306	EX_acald_e	GSMM_259	EX_g6p_B_e	('NTC', 'NTC')	NTC	NTC
3058	EX_4hbz_e	GSMM_365	EX_acald_e	GSMM_259	EX_g6p_B_e	('NTC', 'NTC')	NTC	NTC
3059	EX_4hbz_e	GSMM_374	EX_acald_e	GSMM_259	EX_g6p_B_e	('NTC', 'NTC')	NTC	NTC
3066	EX_4hbz_e	GSMM_024	EX_5drib_e	GSMM_259	EX_g6p_B_e	('NTC', 'NTC')	NTC	NTC
3073	EX_4hbz_e	GSMM_057	EX_5drib_e	GSMM_259	EX_g6p_B_e	('NTC', 'NTC')	NTC	NTC
3078	EX_4hbz_e	GSMM_093	EX_5drib_e	GSMM_259	EX_g6p_B_e	('NTC', 'NTC')	NTC	NTC
3080	EX_4hbz_e	GSMM_104	EX_5drib_e	GSMM_259	EX_g6p_B_e	('NTC', 'NTC')	NTC	NTC
3086	EX_4hbz_e	GSMM_142	EX_5drib_e	GSMM_259	EX_g6p_B_e	('NTC', 'NTC')	NTC	NTC
3095	EX_4hbz_e	GSMM_220	EX_5drib_e	GSMM_259	EX_g6p_B_e	('NTC', 'NTC')	NTC	NTC
3096	EX_4hbz_e	GSMM_225	EX_5drib_e	GSMM_259	EX_g6p_B_e	('NTC', 'NTC')	NTC	NTC
3098	EX_4hbz_e	GSMM_232	EX_5drib_e	GSMM_259	EX_g6p_B_e	('NTC', 'NTC')	NTC	NTC
3100	EX_4hbz_e	GSMM_256	EX_5drib_e	GSMM_259	EX_g6p_B_e	('NTC', 'NTC')	NTC	NTC
3101	EX_4hbz_e	GSMM_261	EX_5drib_e	GSMM_259	EX_g6p_B_e	('NTC', 'NTC')	NTC	NTC
3102	EX_4hbz_e	GSMM_262	EX_5drib_e	GSMM_259	EX_g6p_B_e	('NTC', 'NTC')	NTC	NTC
3103	EX_4hbz_e	GSMM_265	EX_5drib_e	GSMM_259	EX_g6p_B_e	('NTC', 'NTC')	NTC	NTC
3106	EX_4hbz_e	GSMM_306	EX_5drib_e	GSMM_259	EX_g6p_B_e	('NTC', 'NTC')	NTC	NTC
3117	EX_4hbz_e	GSMM_365	EX_5drib_e	GSMM_259	EX_g6p_B_e	('NTC', 'NTC')	NTC	NTC
3118	EX_4hbz_e	GSMM_374	EX_5drib_e	GSMM_259	EX_g6p_B_e	('NTC', 'NTC')	NTC	NTC
3130	EX_4hbz_e	GSMM_104	EX_for_e	GSMM_259	EX_g6p_B_e	('NTC', 'NTC')	NTC	NTC
3136	EX_4hbz_e	GSMM_232	EX_for_e	GSMM_259	EX_g6p_B_e	('NTC', 'NTC')	NTC	NTC
3137	EX_4hbz_e	GSMM_256	EX_for_e	GSMM_259	EX_g6p_B_e	('NTC', 'NTC')	NTC	NTC
3138	EX_4hbz_e	GSMM_262	EX_for_e	GSMM_259	EX_g6p_B_e	('NTC', 'NTC')	NTC	NTC
3142	EX_4hbz_e	GSMM_365	EX_for_e	GSMM_259	EX_g6p_B_e	('NTC', 'NTC')	NTC	NTC
3143	EX_4hbz_e	GSMM_374	EX_for_e	GSMM_259	EX_g6p_B_e	('NTC', 'NTC')	NTC	NTC
3153	EX_4hbz_e	GSMM_104	EX_glyc3p_e	GSMM_259	EX_g6p_B_e	('NTC', 'NTC')	NTC	NTC
3157	EX_4hbz_e	GSMM_142	EX_glyc3p_e	GSMM_259	EX_g6p_B_e	('NTC', 'NTC')	NTC	NTC
3163	EX_4hbz_e	GSMM_220	EX_glyc3p_e	GSMM_259	EX_g6p_B_e	('NTC', 'NTC')	NTC	NTC
3164	EX_4hbz_e	GSMM_225	EX_glyc3p_e	GSMM_259	EX_g6p_B_e	('NTC', 'NTC')	NTC	NTC
3166	EX_4hbz_e	GSMM_256	EX_glyc3p_e	GSMM_259	EX_g6p_B_e	('NTC', 'NTC')	NTC	NTC
3167	EX_4hbz_e	GSMM_261	EX_glyc3p_e	GSMM_259	EX_g6p_B_e	('NTC', 'NTC')	NTC	NTC
3168	EX_4hbz_e	GSMM_262	EX_glyc3p_e	GSMM_259	EX_g6p_B_e	('NTC', 'NTC')	NTC	NTC
3169	EX_4hbz_e	GSMM_265	EX_glyc3p_e	GSMM_259	EX_g6p_B_e	('NTC', 'NTC')	NTC	NTC
3171	EX_4hbz_e	GSMM_280	EX_glyc3p_e	GSMM_259	EX_g6p_B_e	('NTC', 'NTC')	NTC	NTC
3177	EX_4hbz_e	GSMM_365	EX_glyc3p_e	GSMM_259	EX_g6p_B_e	('NTC', 'NTC')	NTC	NTC
3188	EX_4hbz_e	GSMM_104	EX_5mdru1p_e	GSMM_259	EX_g6p_B_e	('NTC', 'NTC')	NTC	NTC
3198	EX_4hbz_e	GSMM_220	EX_5mdru1p_e	GSMM_259	EX_g6p_B_e	('NTC', 'NTC')	NTC	NTC
3200	EX_4hbz_e	GSMM_232	EX_5mdru1p_e	GSMM_259	EX_g6p_B_e	('NTC', 'NTC')	NTC	NTC
3201	EX_4hbz_e	GSMM_261	EX_5mdru1p_e	GSMM_259	EX_g6p_B_e	('NTC', 'NTC')	NTC	NTC
3206	EX_4hbz_e	GSMM_365	EX_5mdru1p_e	GSMM_259	EX_g6p_B_e	('NTC', 'NTC')	NTC	NTC
3215	EX_4hbz_e	GSMM_024	EX_fald_e	GSMM_259	EX_g6p_B_e	('NTC', 'NTC')	NTC	NTC
3224	EX_4hbz_e	GSMM_057	EX_fald_e	GSMM_259	EX_g6p_B_e	('NTC', 'NTC')	NTC	NTC
3229	EX_4hbz_e	GSMM_093	EX_fald_e	GSMM_259	EX_g6p_B_e	('NTC', 'NTC')	NTC	NTC
3236	EX_4hbz_e	GSMM_142	EX_fald_e	GSMM_259	EX_g6p_B_e	('NTC', 'NTC')	NTC	NTC
3239	EX_4hbz_e	GSMM_161	EX_fald_e	GSMM_259	EX_g6p_B_e	('NTC', 'NTC')	NTC	NTC
3246	EX_4hbz_e	GSMM_220	EX_fald_e	GSMM_259	EX_g6p_B_e	('NTC', 'NTC')	NTC	NTC
3247	EX_4hbz_e	GSMM_225	EX_fald_e	GSMM_259	EX_g6p_B_e	('NTC', 'NTC')	NTC	NTC
3249	EX_4hbz_e	GSMM_232	EX_fald_e	GSMM_259	EX_g6p_B_e	('NTC', 'NTC')	NTC	NTC
3251	EX_4hbz_e	GSMM_256	EX_fald_e	GSMM_259	EX_g6p_B_e	('NTC', 'NTC')	NTC	NTC
3252	EX_4hbz_e	GSMM_261	EX_fald_e	GSMM_259	EX_g6p_B_e	('NTC', 'NTC')	NTC	NTC
3253	EX_4hbz_e	GSMM_262	EX_fald_e	GSMM_259	EX_g6p_B_e	('NTC', 'NTC')	NTC	NTC
3254	EX_4hbz_e	GSMM_265	EX_fald_e	GSMM_259	EX_g6p_B_e	('NTC', 'NTC')	NTC	NTC
3257	EX_4hbz_e	GSMM_280	EX_fald_e	GSMM_259	EX_g6p_B_e	('NTC', 'NTC')	NTC	NTC
3258	EX_4hbz_e	GSMM_306	EX_fald_e	GSMM_259	EX_g6p_B_e	('NTC', 'NTC')	NTC	NTC
3270	EX_4hbz_e	GSMM_365	EX_fald_e	GSMM_259	EX_g6p_B_e	('NTC', 'NTC')	NTC	NTC
3271	EX_4hbz_e	GSMM_374	EX_fald_e	GSMM_259	EX_g6p_B_e	('NTC', 'NTC')	NTC	NTC
3277	EX_4hbz_e	GSMM_024	EX_ptrc_e	GSMM_259	EX_g6p_B_e	('NTC', 'NTC')	NTC	NTC
3285	EX_4hbz_e	GSMM_057	EX_ptrc_e	GSMM_259	EX_g6p_B_e	('NTC', 'NTC')	NTC	NTC
3292	EX_4hbz_e	GSMM_142	EX_ptrc_e	GSMM_259	EX_g6p_B_e	('NTC', 'NTC')	NTC	NTC
3296	EX_4hbz_e	GSMM_161	EX_ptrc_e	GSMM_259	EX_g6p_B_e	('NTC', 'NTC')	NTC	NTC
3302	EX_4hbz_e	GSMM_220	EX_ptrc_e	GSMM_259	EX_g6p_B_e	('NTC', 'NTC')	NTC	NTC
3303	EX_4hbz_e	GSMM_225	EX_ptrc_e	GSMM_259	EX_g6p_B_e	('NTC', 'NTC')	NTC	NTC
3306	EX_4hbz_e	GSMM_256	EX_ptrc_e	GSMM_259	EX_g6p_B_e	('NTC', 'NTC')	NTC	NTC
3307	EX_4hbz_e	GSMM_261	EX_ptrc_e	GSMM_259	EX_g6p_B_e	('NTC', 'NTC')	NTC	NTC
3308	EX_4hbz_e	GSMM_262	EX_ptrc_e	GSMM_259	EX_g6p_B_e	('NTC', 'NTC')	NTC	NTC
3310	EX_4hbz_e	GSMM_306	EX_ptrc_e	GSMM_259	EX_g6p_B_e	('NTC', 'NTC')	NTC	NTC
3320	EX_4hbz_e	GSMM_365	EX_ptrc_e	GSMM_259	EX_g6p_B_e	('NTC', 'NTC')	NTC	NTC
3321	EX_4hbz_e	GSMM_374	EX_ptrc_e	GSMM_259	EX_g6p_B_e	('NTC', 'NTC')	NTC	NTC
3327	EX_4hbz_e	GSMM_024	EX_rib__D_e	GSMM_259	EX_g6p_B_e	('NTC', 'NTC')	NTC	NTC
3334	EX_4hbz_e	GSMM_057	EX_rib__D_e	GSMM_259	EX_g6p_B_e	('NTC', 'NTC')	NTC	NTC
3337	EX_4hbz_e	GSMM_093	EX_rib__D_e	GSMM_259	EX_g6p_B_e	('NTC', 'NTC')	NTC	NTC
3339	EX_4hbz_e	GSMM_104	EX_rib__D_e	GSMM_259	EX_g6p_B_e	('NTC', 'NTC')	NTC	NTC
3343	EX_4hbz_e	GSMM_142	EX_rib__D_e	GSMM_259	EX_g6p_B_e	('NTC', 'NTC')	NTC	NTC
3350	EX_4hbz_e	GSMM_220	EX_rib__D_e	GSMM_259	EX_g6p_B_e	('NTC', 'NTC')	NTC	NTC
3351	EX_4hbz_e	GSMM_225	EX_rib__D_e	GSMM_259	EX_g6p_B_e	('NTC', 'NTC')	NTC	NTC
3353	EX_4hbz_e	GSMM_232	EX_rib__D_e	GSMM_259	EX_g6p_B_e	('NTC', 'NTC')	NTC	NTC
3354	EX_4hbz_e	GSMM_256	EX_rib__D_e	GSMM_259	EX_g6p_B_e	('NTC', 'NTC')	NTC	NTC
3355	EX_4hbz_e	GSMM_262	EX_rib__D_e	GSMM_259	EX_g6p_B_e	('NTC', 'NTC')	NTC	NTC
3356	EX_4hbz_e	GSMM_265	EX_rib__D_e	GSMM_259	EX_g6p_B_e	('NTC', 'NTC')	NTC	NTC
3358	EX_4hbz_e	GSMM_280	EX_rib__D_e	GSMM_259	EX_g6p_B_e	('NTC', 'NTC')	NTC	NTC
3359	EX_4hbz_e	GSMM_306	EX_rib__D_e	GSMM_259	EX_g6p_B_e	('NTC', 'NTC')	NTC	NTC
3371	EX_4hbz_e	GSMM_365	EX_rib__D_e	GSMM_259	EX_g6p_B_e	('NTC', 'NTC')	NTC	NTC
3372	EX_4hbz_e	GSMM_374	EX_rib__D_e	GSMM_259	EX_g6p_B_e	('NTC', 'NTC')	NTC	NTC
3376	EX_4hbz_e	GSMM_024	EX_actn__R_e	GSMM_259	EX_g6p_B_e	('NTC', 'NTC')	NTC	NTC
3384	EX_4hbz_e	GSMM_104	EX_actn__R_e	GSMM_259	EX_g6p_B_e	('NTC', 'NTC')	NTC	NTC
3391	EX_4hbz_e	GSMM_262	EX_actn__R_e	GSMM_259	EX_g6p_B_e	('NTC', 'NTC')	NTC	NTC
3392	EX_4hbz_e	GSMM_280	EX_actn__R_e	GSMM_259	EX_g6p_B_e	('NTC', 'NTC')	NTC	NTC
3399	EX_4hbz_e	GSMM_365	EX_actn__R_e	GSMM_259	EX_g6p_B_e	('NTC', 'NTC')	NTC	NTC
3400	EX_4hbz_e	GSMM_374	EX_actn__R_e	GSMM_259	EX_g6p_B_e	('NTC', 'NTC')	NTC	NTC
3407	EX_4hbz_e	GSMM_024	EX_spmd_e	GSMM_259	EX_g6p_B_e	('NTC', 'NTC')	NTC	NTC
3419	EX_4hbz_e	GSMM_104	EX_spmd_e	GSMM_259	EX_g6p_B_e	('NTC', 'NTC')	NTC	NTC
3424	EX_4hbz_e	GSMM_142	EX_spmd_e	GSMM_259	EX_g6p_B_e	('NTC', 'NTC')	NTC	NTC
3428	EX_4hbz_e	GSMM_161	EX_spmd_e	GSMM_259	EX_g6p_B_e	('NTC', 'NTC')	NTC	NTC
3433	EX_4hbz_e	GSMM_220	EX_spmd_e	GSMM_259	EX_g6p_B_e	('NTC', 'NTC')	NTC	NTC
3434	EX_4hbz_e	GSMM_225	EX_spmd_e	GSMM_259	EX_g6p_B_e	('NTC', 'NTC')	NTC	NTC
3436	EX_4hbz_e	GSMM_232	EX_spmd_e	GSMM_259	EX_g6p_B_e	('NTC', 'NTC')	NTC	NTC
3437	EX_4hbz_e	GSMM_256	EX_spmd_e	GSMM_259	EX_g6p_B_e	('NTC', 'NTC')	NTC	NTC
3438	EX_4hbz_e	GSMM_261	EX_spmd_e	GSMM_259	EX_g6p_B_e	('NTC', 'NTC')	NTC	NTC
3439	EX_4hbz_e	GSMM_265	EX_spmd_e	GSMM_259	EX_g6p_B_e	('NTC', 'NTC')	NTC	NTC
3447	EX_4hbz_e	GSMM_365	EX_spmd_e	GSMM_259	EX_g6p_B_e	('NTC', 'NTC')	NTC	NTC
3448	EX_4hbz_e	GSMM_374	EX_spmd_e	GSMM_259	EX_g6p_B_e	('NTC', 'NTC')	NTC	NTC
3457	EX_4hbz_e	GSMM_024	EX_glyc_e	GSMM_259	EX_g6p_B_e	('NTC', 'NTC')	NTC	NTC
3466	EX_4hbz_e	GSMM_057	EX_glyc_e	GSMM_259	EX_g6p_B_e	('NTC', 'NTC')	NTC	NTC
3470	EX_4hbz_e	GSMM_093	EX_glyc_e	GSMM_259	EX_g6p_B_e	('NTC', 'NTC')	NTC	NTC
3472	EX_4hbz_e	GSMM_104	EX_glyc_e	GSMM_259	EX_g6p_B_e	('NTC', 'NTC')	NTC	NTC
3482	EX_4hbz_e	GSMM_161	EX_glyc_e	GSMM_259	EX_g6p_B_e	('NTC', 'NTC')	NTC	NTC
3488	EX_4hbz_e	GSMM_220	EX_glyc_e	GSMM_259	EX_g6p_B_e	('NTC', 'NTC')	NTC	NTC
3489	EX_4hbz_e	GSMM_225	EX_glyc_e	GSMM_259	EX_g6p_B_e	('NTC', 'NTC')	NTC	NTC
3491	EX_4hbz_e	GSMM_232	EX_glyc_e	GSMM_259	EX_g6p_B_e	('NTC', 'NTC')	NTC	NTC
3493	EX_4hbz_e	GSMM_256	EX_glyc_e	GSMM_259	EX_g6p_B_e	('NTC', 'NTC')	NTC	NTC
3494	EX_4hbz_e	GSMM_261	EX_glyc_e	GSMM_259	EX_g6p_B_e	('NTC', 'NTC')	NTC	NTC
3495	EX_4hbz_e	GSMM_262	EX_glyc_e	GSMM_259	EX_g6p_B_e	('NTC', 'NTC')	NTC	NTC
3496	EX_4hbz_e	GSMM_265	EX_glyc_e	GSMM_259	EX_g6p_B_e	('NTC', 'NTC')	NTC	NTC
3499	EX_4hbz_e	GSMM_280	EX_glyc_e	GSMM_259	EX_g6p_B_e	('NTC', 'NTC')	NTC	NTC
3511	EX_4hbz_e	GSMM_365	EX_glyc_e	GSMM_259	EX_g6p_B_e	('NTC', 'NTC')	NTC	NTC
3512	EX_4hbz_e	GSMM_374	EX_glyc_e	GSMM_259	EX_g6p_B_e	('NTC', 'NTC')	NTC	NTC
3521	EX_4hbz_e	GSMM_024	EX_fe3pyovd_kt_e	GSMM_259	EX_g6p_B_e	('NTC', 'NTC')	NTC	NTC
3530	EX_4hbz_e	GSMM_057	EX_fe3pyovd_kt_e	GSMM_259	EX_g6p_B_e	('NTC', 'NTC')	NTC	NTC
3535	EX_4hbz_e	GSMM_093	EX_fe3pyovd_kt_e	GSMM_259	EX_g6p_B_e	('NTC', 'NTC')	NTC	NTC
3537	EX_4hbz_e	GSMM_104	EX_fe3pyovd_kt_e	GSMM_259	EX_g6p_B_e	('NTC', 'NTC')	NTC	NTC
3543	EX_4hbz_e	GSMM_142	EX_fe3pyovd_kt_e	GSMM_259	EX_g6p_B_e	('NTC', 'NTC')	NTC	NTC
3548	EX_4hbz_e	GSMM_161	EX_fe3pyovd_kt_e	GSMM_259	EX_g6p_B_e	('NTC', 'NTC')	NTC	NTC
3555	EX_4hbz_e	GSMM_220	EX_fe3pyovd_kt_e	GSMM_259	EX_g6p_B_e	('NTC', 'NTC')	NTC	NTC
3556	EX_4hbz_e	GSMM_225	EX_fe3pyovd_kt_e	GSMM_259	EX_g6p_B_e	('NTC', 'NTC')	NTC	NTC
3558	EX_4hbz_e	GSMM_232	EX_fe3pyovd_kt_e	GSMM_259	EX_g6p_B_e	('NTC', 'NTC')	NTC	NTC
3560	EX_4hbz_e	GSMM_256	EX_fe3pyovd_kt_e	GSMM_259	EX_g6p_B_e	('NTC', 'NTC')	NTC	NTC
3561	EX_4hbz_e	GSMM_261	EX_fe3pyovd_kt_e	GSMM_259	EX_g6p_B_e	('NTC', 'NTC')	NTC	NTC
3562	EX_4hbz_e	GSMM_262	EX_fe3pyovd_kt_e	GSMM_259	EX_g6p_B_e	('NTC', 'NTC')	NTC	NTC
3563	EX_4hbz_e	GSMM_265	EX_fe3pyovd_kt_e	GSMM_259	EX_g6p_B_e	('NTC', 'NTC')	NTC	NTC
3566	EX_4hbz_e	GSMM_280	EX_fe3pyovd_kt_e	GSMM_259	EX_g6p_B_e	('NTC', 'NTC')	NTC	NTC
3567	EX_4hbz_e	GSMM_306	EX_fe3pyovd_kt_e	GSMM_259	EX_g6p_B_e	('NTC', 'NTC')	NTC	NTC
3579	EX_4hbz_e	GSMM_365	EX_fe3pyovd_kt_e	GSMM_259	EX_g6p_B_e	('NTC', 'NTC')	NTC	NTC
3580	EX_4hbz_e	GSMM_374	EX_fe3pyovd_kt_e	GSMM_259	EX_g6p_B_e	('NTC', 'NTC')	NTC	NTC
3589	EX_4hbz_e	GSMM_024	EX_pyovd_kt_e	GSMM_259	EX_g6p_B_e	('NTC', 'NTC')	NTC	NTC
3598	EX_4hbz_e	GSMM_057	EX_pyovd_kt_e	GSMM_259	EX_g6p_B_e	('NTC', 'NTC')	NTC	NTC
3603	EX_4hbz_e	GSMM_093	EX_pyovd_kt_e	GSMM_259	EX_g6p_B_e	('NTC', 'NTC')	NTC	NTC
3605	EX_4hbz_e	GSMM_104	EX_pyovd_kt_e	GSMM_259	EX_g6p_B_e	('NTC', 'NTC')	NTC	NTC
3611	EX_4hbz_e	GSMM_142	EX_pyovd_kt_e	GSMM_259	EX_g6p_B_e	('NTC', 'NTC')	NTC	NTC
3616	EX_4hbz_e	GSMM_161	EX_pyovd_kt_e	GSMM_259	EX_g6p_B_e	('NTC', 'NTC')	NTC	NTC
3623	EX_4hbz_e	GSMM_220	EX_pyovd_kt_e	GSMM_259	EX_g6p_B_e	('NTC', 'NTC')	NTC	NTC
3624	EX_4hbz_e	GSMM_225	EX_pyovd_kt_e	GSMM_259	EX_g6p_B_e	('NTC', 'NTC')	NTC	NTC
3626	EX_4hbz_e	GSMM_232	EX_pyovd_kt_e	GSMM_259	EX_g6p_B_e	('NTC', 'NTC')	NTC	NTC
3628	EX_4hbz_e	GSMM_256	EX_pyovd_kt_e	GSMM_259	EX_g6p_B_e	('NTC', 'NTC')	NTC	NTC
3629	EX_4hbz_e	GSMM_261	EX_pyovd_kt_e	GSMM_259	EX_g6p_B_e	('NTC', 'NTC')	NTC	NTC
3630	EX_4hbz_e	GSMM_262	EX_pyovd_kt_e	GSMM_259	EX_g6p_B_e	('NTC', 'NTC')	NTC	NTC
3631	EX_4hbz_e	GSMM_265	EX_pyovd_kt_e	GSMM_259	EX_g6p_B_e	('NTC', 'NTC')	NTC	NTC
3634	EX_4hbz_e	GSMM_280	EX_pyovd_kt_e	GSMM_259	EX_g6p_B_e	('NTC', 'NTC')	NTC	NTC
3635	EX_4hbz_e	GSMM_306	EX_pyovd_kt_e	GSMM_259	EX_g6p_B_e	('NTC', 'NTC')	NTC	NTC
3647	EX_4hbz_e	GSMM_365	EX_pyovd_kt_e	GSMM_259	EX_g6p_B_e	('NTC', 'NTC')	NTC	NTC
3648	EX_4hbz_e	GSMM_374	EX_pyovd_kt_e	GSMM_259	EX_g6p_B_e	('NTC', 'NTC')	NTC	NTC
3654	EX_4hbz_e	GSMM_104	EX_cellb_e	GSMM_259	EX_g6p_B_e	('NTC', 'NTC')	NTC	NTC
3663	EX_4hbz_e	GSMM_024	EX_ser__L_e	GSMM_259	EX_g6p_B_e	('NTC', 'NTC')	NTC	NTC
3669	EX_4hbz_e	GSMM_057	EX_ser__L_e	GSMM_259	EX_g6p_B_e	('NTC', 'NTC')	NTC	NTC
3670	EX_4hbz_e	GSMM_104	EX_ser__L_e	GSMM_259	EX_g6p_B_e	('NTC', 'NTC')	NTC	NTC
3673	EX_4hbz_e	GSMM_142	EX_ser__L_e	GSMM_259	EX_g6p_B_e	('NTC', 'NTC')	NTC	NTC
3679	EX_4hbz_e	GSMM_220	EX_ser__L_e	GSMM_259	EX_g6p_B_e	('NTC', 'NTC')	NTC	NTC
3680	EX_4hbz_e	GSMM_225	EX_ser__L_e	GSMM_259	EX_g6p_B_e	('NTC', 'NTC')	NTC	NTC
3682	EX_4hbz_e	GSMM_261	EX_ser__L_e	GSMM_259	EX_g6p_B_e	('NTC', 'NTC')	NTC	NTC
3683	EX_4hbz_e	GSMM_262	EX_ser__L_e	GSMM_259	EX_g6p_B_e	('NTC', 'NTC')	NTC	NTC
3684	EX_4hbz_e	GSMM_265	EX_ser__L_e	GSMM_259	EX_g6p_B_e	('NTC', 'NTC')	NTC	NTC
3686	EX_4hbz_e	GSMM_280	EX_ser__L_e	GSMM_259	EX_g6p_B_e	('NTC', 'NTC')	NTC	NTC
3693	EX_4hbz_e	GSMM_365	EX_ser__L_e	GSMM_259	EX_g6p_B_e	('NTC', 'NTC')	NTC	NTC
3700	EX_4hbz_e	GSMM_024	EX_urea_e	GSMM_259	EX_g6p_B_e	('NTC', 'NTC')	NTC	NTC
3709	EX_4hbz_e	GSMM_057	EX_urea_e	GSMM_259	EX_g6p_B_e	('NTC', 'NTC')	NTC	NTC
3712	EX_4hbz_e	GSMM_093	EX_urea_e	GSMM_259	EX_g6p_B_e	('NTC', 'NTC')	NTC	NTC
3714	EX_4hbz_e	GSMM_104	EX_urea_e	GSMM_259	EX_g6p_B_e	('NTC', 'NTC')	NTC	NTC
3721	EX_4hbz_e	GSMM_161	EX_urea_e	GSMM_259	EX_g6p_B_e	('NTC', 'NTC')	NTC	NTC
3726	EX_4hbz_e	GSMM_220	EX_urea_e	GSMM_259	EX_g6p_B_e	('NTC', 'NTC')	NTC	NTC
3727	EX_4hbz_e	GSMM_232	EX_urea_e	GSMM_259	EX_g6p_B_e	('NTC', 'NTC')	NTC	NTC
3729	EX_4hbz_e	GSMM_256	EX_urea_e	GSMM_259	EX_g6p_B_e	('NTC', 'NTC')	NTC	NTC
3730	EX_4hbz_e	GSMM_261	EX_urea_e	GSMM_259	EX_g6p_B_e	('NTC', 'NTC')	NTC	NTC
3731	EX_4hbz_e	GSMM_262	EX_urea_e	GSMM_259	EX_g6p_B_e	('NTC', 'NTC')	NTC	NTC
3732	EX_4hbz_e	GSMM_265	EX_urea_e	GSMM_259	EX_g6p_B_e	('NTC', 'NTC')	NTC	NTC
3735	EX_4hbz_e	GSMM_280	EX_urea_e	GSMM_259	EX_g6p_B_e	('NTC', 'NTC')	NTC	NTC
3736	EX_4hbz_e	GSMM_306	EX_urea_e	GSMM_259	EX_g6p_B_e	('NTC', 'NTC')	NTC	NTC
3747	EX_4hbz_e	GSMM_365	EX_urea_e	GSMM_259	EX_g6p_B_e	('NTC', 'NTC')	NTC	NTC
3748	EX_4hbz_e	GSMM_374	EX_urea_e	GSMM_259	EX_g6p_B_e	('NTC', 'NTC')	NTC	NTC
3759	EX_4hbz_e	GSMM_093	EX_inost_e	GSMM_259	EX_g6p_B_e	('NTC', 'NTC')	NTC	NTC
3763	EX_4hbz_e	GSMM_142	EX_inost_e	GSMM_259	EX_g6p_B_e	('NTC', 'NTC')	NTC	NTC
3770	EX_4hbz_e	GSMM_225	EX_inost_e	GSMM_259	EX_g6p_B_e	('NTC', 'NTC')	NTC	NTC
3772	EX_4hbz_e	GSMM_265	EX_inost_e	GSMM_259	EX_g6p_B_e	('NTC', 'NTC')	NTC	NTC
3785	EX_4hbz_e	GSMM_104	EX_chol_e	GSMM_259	EX_g6p_B_e	('NTC', 'NTC')	NTC	NTC
3788	EX_4hbz_e	GSMM_142	EX_chol_e	GSMM_259	EX_g6p_B_e	('NTC', 'NTC')	NTC	NTC
3794	EX_4hbz_e	GSMM_220	EX_chol_e	GSMM_259	EX_g6p_B_e	('NTC', 'NTC')	NTC	NTC
3795	EX_4hbz_e	GSMM_225	EX_chol_e	GSMM_259	EX_g6p_B_e	('NTC', 'NTC')	NTC	NTC
3797	EX_4hbz_e	GSMM_256	EX_chol_e	GSMM_259	EX_g6p_B_e	('NTC', 'NTC')	NTC	NTC
3798	EX_4hbz_e	GSMM_261	EX_chol_e	GSMM_259	EX_g6p_B_e	('NTC', 'NTC')	NTC	NTC
3799	EX_4hbz_e	GSMM_262	EX_chol_e	GSMM_259	EX_g6p_B_e	('NTC', 'NTC')	NTC	NTC
3800	EX_4hbz_e	GSMM_265	EX_chol_e	GSMM_259	EX_g6p_B_e	('NTC', 'NTC')	NTC	NTC
3802	EX_4hbz_e	GSMM_280	EX_chol_e	GSMM_259	EX_g6p_B_e	('NTC', 'NTC')	NTC	NTC
3811	EX_4hbz_e	GSMM_365	EX_chol_e	GSMM_259	EX_g6p_B_e	('NTC', 'NTC')	NTC	NTC
3816	EX_4hbz_e	GSMM_057	EX_glyald_e	GSMM_259	EX_g6p_B_e	('NTC', 'NTC')	NTC	NTC
3818	EX_4hbz_e	GSMM_093	EX_glyald_e	GSMM_259	EX_g6p_B_e	('NTC', 'NTC')	NTC	NTC
3825	EX_4hbz_e	GSMM_161	EX_glyald_e	GSMM_259	EX_g6p_B_e	('NTC', 'NTC')	NTC	NTC
3830	EX_4hbz_e	GSMM_220	EX_glyald_e	GSMM_259	EX_g6p_B_e	('NTC', 'NTC')	NTC	NTC
3832	EX_4hbz_e	GSMM_256	EX_glyald_e	GSMM_259	EX_g6p_B_e	('NTC', 'NTC')	NTC	NTC
3833	EX_4hbz_e	GSMM_261	EX_glyald_e	GSMM_259	EX_g6p_B_e	('NTC', 'NTC')	NTC	NTC
3834	EX_4hbz_e	GSMM_265	EX_glyald_e	GSMM_259	EX_g6p_B_e	('NTC', 'NTC')	NTC	NTC
3837	EX_4hbz_e	GSMM_306	EX_glyald_e	GSMM_259	EX_g6p_B_e	('NTC', 'NTC')	NTC	NTC
3842	EX_4hbz_e	GSMM_374	EX_glyald_e	GSMM_259	EX_g6p_B_e	('NTC', 'NTC')	NTC	NTC
3851	EX_4hbz_e	GSMM_057	EX_ura_e	GSMM_259	EX_g6p_B_e	('NTC', 'NTC')	NTC	NTC
3853	EX_4hbz_e	GSMM_093	EX_ura_e	GSMM_259	EX_g6p_B_e	('NTC', 'NTC')	NTC	NTC
3857	EX_4hbz_e	GSMM_161	EX_ura_e	GSMM_259	EX_g6p_B_e	('NTC', 'NTC')	NTC	NTC
3860	EX_4hbz_e	GSMM_220	EX_ura_e	GSMM_259	EX_g6p_B_e	('NTC', 'NTC')	NTC	NTC
3862	EX_4hbz_e	GSMM_262	EX_ura_e	GSMM_259	EX_g6p_B_e	('NTC', 'NTC')	NTC	NTC
3863	EX_4hbz_e	GSMM_265	EX_ura_e	GSMM_259	EX_g6p_B_e	('NTC', 'NTC')	NTC	NTC
3872	EX_4hbz_e	GSMM_024	EX_gal_e	GSMM_259	EX_g6p_B_e	('NTC', 'NTC')	NTC	NTC
3878	EX_4hbz_e	GSMM_057	EX_gal_e	GSMM_259	EX_g6p_B_e	('NTC', 'NTC')	NTC	NTC
3882	EX_4hbz_e	GSMM_104	EX_gal_e	GSMM_259	EX_g6p_B_e	('NTC', 'NTC')	NTC	NTC
3887	EX_4hbz_e	GSMM_142	EX_gal_e	GSMM_259	EX_g6p_B_e	('NTC', 'NTC')	NTC	NTC
3892	EX_4hbz_e	GSMM_220	EX_gal_e	GSMM_259	EX_g6p_B_e	('NTC', 'NTC')	NTC	NTC
3893	EX_4hbz_e	GSMM_225	EX_gal_e	GSMM_259	EX_g6p_B_e	('NTC', 'NTC')	NTC	NTC
3895	EX_4hbz_e	GSMM_232	EX_gal_e	GSMM_259	EX_g6p_B_e	('NTC', 'NTC')	NTC	NTC
3897	EX_4hbz_e	GSMM_256	EX_gal_e	GSMM_259	EX_g6p_B_e	('NTC', 'NTC')	NTC	NTC
3898	EX_4hbz_e	GSMM_262	EX_gal_e	GSMM_259	EX_g6p_B_e	('NTC', 'NTC')	NTC	NTC
3899	EX_4hbz_e	GSMM_265	EX_gal_e	GSMM_259	EX_g6p_B_e	('NTC', 'NTC')	NTC	NTC
3909	EX_4hbz_e	GSMM_365	EX_gal_e	GSMM_259	EX_g6p_B_e	('NTC', 'NTC')	NTC	NTC
3917	EX_4hbz_e	GSMM_104	EX_gua_e	GSMM_259	EX_g6p_B_e	('NTC', 'NTC')	NTC	NTC
3921	EX_4hbz_e	GSMM_220	EX_gua_e	GSMM_259	EX_g6p_B_e	('NTC', 'NTC')	NTC	NTC
3922	EX_4hbz_e	GSMM_225	EX_gua_e	GSMM_259	EX_g6p_B_e	('NTC', 'NTC')	NTC	NTC
3923	EX_4hbz_e	GSMM_232	EX_gua_e	GSMM_259	EX_g6p_B_e	('NTC', 'NTC')	NTC	NTC
3924	EX_4hbz_e	GSMM_262	EX_gua_e	GSMM_259	EX_g6p_B_e	('NTC', 'NTC')	NTC	NTC
3925	EX_4hbz_e	GSMM_265	EX_gua_e	GSMM_259	EX_g6p_B_e	('NTC', 'NTC')	NTC	NTC
3932	EX_4hbz_e	GSMM_057	EX_mththf_e	GSMM_259	EX_g6p_B_e	('NTC', 'NTC')	NTC	NTC
3940	EX_4hbz_e	GSMM_220	EX_mththf_e	GSMM_259	EX_g6p_B_e	('NTC', 'NTC')	NTC	NTC
3941	EX_4hbz_e	GSMM_262	EX_mththf_e	GSMM_259	EX_g6p_B_e	('NTC', 'NTC')	NTC	NTC
3949	EX_4hbz_e	GSMM_024	EX_ind3ac_e	GSMM_259	EX_g6p_B_e	('NTC', 'NTC')	NTC	NTC
3957	EX_4hbz_e	GSMM_057	EX_ind3ac_e	GSMM_259	EX_g6p_B_e	('NTC', 'NTC')	NTC	NTC
3962	EX_4hbz_e	GSMM_093	EX_ind3ac_e	GSMM_259	EX_g6p_B_e	('NTC', 'NTC')	NTC	NTC
3967	EX_4hbz_e	GSMM_142	EX_ind3ac_e	GSMM_259	EX_g6p_B_e	('NTC', 'NTC')	NTC	NTC
3969	EX_4hbz_e	GSMM_161	EX_ind3ac_e	GSMM_259	EX_g6p_B_e	('NTC', 'NTC')	NTC	NTC
3974	EX_4hbz_e	GSMM_220	EX_ind3ac_e	GSMM_259	EX_g6p_B_e	('NTC', 'NTC')	NTC	NTC
3976	EX_4hbz_e	GSMM_232	EX_ind3ac_e	GSMM_259	EX_g6p_B_e	('NTC', 'NTC')	NTC	NTC
3978	EX_4hbz_e	GSMM_261	EX_ind3ac_e	GSMM_259	EX_g6p_B_e	('NTC', 'NTC')	NTC	NTC
3979	EX_4hbz_e	GSMM_262	EX_ind3ac_e	GSMM_259	EX_g6p_B_e	('NTC', 'NTC')	NTC	NTC
3980	EX_4hbz_e	GSMM_265	EX_ind3ac_e	GSMM_259	EX_g6p_B_e	('NTC', 'NTC')	NTC	NTC
3983	EX_4hbz_e	GSMM_280	EX_ind3ac_e	GSMM_259	EX_g6p_B_e	('NTC', 'NTC')	NTC	NTC
3984	EX_4hbz_e	GSMM_306	EX_ind3ac_e	GSMM_259	EX_g6p_B_e	('NTC', 'NTC')	NTC	NTC
3995	EX_4hbz_e	GSMM_365	EX_ind3ac_e	GSMM_259	EX_g6p_B_e	('NTC', 'NTC')	NTC	NTC
4002	EX_4hbz_e	GSMM_057	EX_etha_e	GSMM_259	EX_g6p_B_e	('NTC', 'NTC')	NTC	NTC
4004	EX_4hbz_e	GSMM_093	EX_etha_e	GSMM_259	EX_g6p_B_e	('NTC', 'NTC')	NTC	NTC
4006	EX_4hbz_e	GSMM_104	EX_etha_e	GSMM_259	EX_g6p_B_e	('NTC', 'NTC')	NTC	NTC
4019	EX_4hbz_e	GSMM_280	EX_etha_e	GSMM_259	EX_g6p_B_e	('NTC', 'NTC')	NTC	NTC
4025	EX_4hbz_e	GSMM_365	EX_etha_e	GSMM_259	EX_g6p_B_e	('NTC', 'NTC')	NTC	NTC
4032	EX_4hbz_e	GSMM_024	EX_orn_e	GSMM_259	EX_g6p_B_e	('NTC', 'NTC')	NTC	NTC
4037	EX_4hbz_e	GSMM_093	EX_orn_e	GSMM_259	EX_g6p_B_e	('NTC', 'NTC')	NTC	NTC
4038	EX_4hbz_e	GSMM_104	EX_orn_e	GSMM_259	EX_g6p_B_e	('NTC', 'NTC')	NTC	NTC
4042	EX_4hbz_e	GSMM_142	EX_orn_e	GSMM_259	EX_g6p_B_e	('NTC', 'NTC')	NTC	NTC
4045	EX_4hbz_e	GSMM_161	EX_orn_e	GSMM_259	EX_g6p_B_e	('NTC', 'NTC')	NTC	NTC
4050	EX_4hbz_e	GSMM_256	EX_orn_e	GSMM_259	EX_g6p_B_e	('NTC', 'NTC')	NTC	NTC
4051	EX_4hbz_e	GSMM_261	EX_orn_e	GSMM_259	EX_g6p_B_e	('NTC', 'NTC')	NTC	NTC
4052	EX_4hbz_e	GSMM_262	EX_orn_e	GSMM_259	EX_g6p_B_e	('NTC', 'NTC')	NTC	NTC
4054	EX_4hbz_e	GSMM_306	EX_orn_e	GSMM_259	EX_g6p_B_e	('NTC', 'NTC')	NTC	NTC
4060	EX_4hbz_e	GSMM_365	EX_orn_e	GSMM_259	EX_g6p_B_e	('NTC', 'NTC')	NTC	NTC
4061	EX_4hbz_e	GSMM_374	EX_orn_e	GSMM_259	EX_g6p_B_e	('NTC', 'NTC')	NTC	NTC
4071	EX_4hbz_e	GSMM_142	EX_gthrd_e	GSMM_259	EX_g6p_B_e	('NTC', 'NTC')	NTC	NTC
4075	EX_4hbz_e	GSMM_265	EX_gthrd_e	GSMM_259	EX_g6p_B_e	('NTC', 'NTC')	NTC	NTC
4077	EX_4hbz_e	GSMM_280	EX_gthrd_e	GSMM_259	EX_g6p_B_e	('NTC', 'NTC')	NTC	NTC
4078	EX_4hbz_e	GSMM_306	EX_gthrd_e	GSMM_259	EX_g6p_B_e	('NTC', 'NTC')	NTC	NTC
4080	EX_4hbz_e	GSMM_365	EX_gthrd_e	GSMM_259	EX_g6p_B_e	('NTC', 'NTC')	NTC	NTC
4094	EX_4hbz_e	GSMM_225	EX_pacald_e	GSMM_259	EX_g6p_B_e	('NTC', 'NTC')	NTC	NTC
4095	EX_4hbz_e	GSMM_232	EX_pacald_e	GSMM_259	EX_g6p_B_e	('NTC', 'NTC')	NTC	NTC
4097	EX_4hbz_e	GSMM_265	EX_pacald_e	GSMM_259	EX_g6p_B_e	('NTC', 'NTC')	NTC	NTC
4111	EX_4hbz_e	GSMM_142	EX_pea_e	GSMM_259	EX_g6p_B_e	('NTC', 'NTC')	NTC	NTC
4113	EX_4hbz_e	GSMM_225	EX_pea_e	GSMM_259	EX_g6p_B_e	('NTC', 'NTC')	NTC	NTC
4114	EX_4hbz_e	GSMM_265	EX_pea_e	GSMM_259	EX_g6p_B_e	('NTC', 'NTC')	NTC	NTC
4117	EX_4hbz_e	GSMM_374	EX_pea_e	GSMM_259	EX_g6p_B_e	('NTC', 'NTC')	NTC	NTC
4129	EX_4hbz_e	GSMM_232	EX_glu__L_e	GSMM_259	EX_g6p_B_e	('NTC', 'NTC')	NTC	NTC
4130	EX_4hbz_e	GSMM_256	EX_glu__L_e	GSMM_259	EX_g6p_B_e	('NTC', 'NTC')	NTC	NTC
4131	EX_4hbz_e	GSMM_262	EX_glu__L_e	GSMM_259	EX_g6p_B_e	('NTC', 'NTC')	NTC	NTC
4132	EX_4hbz_e	GSMM_265	EX_glu__L_e	GSMM_259	EX_g6p_B_e	('NTC', 'NTC')	NTC	NTC
4133	EX_4hbz_e	GSMM_280	EX_glu__L_e	GSMM_259	EX_g6p_B_e	('NTC', 'NTC')	NTC	NTC
4134	EX_4hbz_e	GSMM_306	EX_glu__L_e	GSMM_259	EX_g6p_B_e	('NTC', 'NTC')	NTC	NTC
4137	EX_4hbz_e	GSMM_365	EX_glu__L_e	GSMM_259	EX_g6p_B_e	('NTC', 'NTC')	NTC	NTC
4138	EX_4hbz_e	GSMM_374	EX_glu__L_e	GSMM_259	EX_g6p_B_e	('NTC', 'NTC')	NTC	NTC
4154	EX_4hbz_e	GSMM_232	EX_cgly_e	GSMM_259	EX_g6p_B_e	('NTC', 'NTC')	NTC	NTC
4155	EX_4hbz_e	GSMM_256	EX_cgly_e	GSMM_259	EX_g6p_B_e	('NTC', 'NTC')	NTC	NTC
4156	EX_4hbz_e	GSMM_265	EX_cgly_e	GSMM_259	EX_g6p_B_e	('NTC', 'NTC')	NTC	NTC
4158	EX_4hbz_e	GSMM_280	EX_cgly_e	GSMM_259	EX_g6p_B_e	('NTC', 'NTC')	NTC	NTC
4159	EX_4hbz_e	GSMM_306	EX_cgly_e	GSMM_259	EX_g6p_B_e	('NTC', 'NTC')	NTC	NTC
4163	EX_4hbz_e	GSMM_365	EX_cgly_e	GSMM_259	EX_g6p_B_e	('NTC', 'NTC')	NTC	NTC
4164	EX_4hbz_e	GSMM_374	EX_cgly_e	GSMM_259	EX_g6p_B_e	('NTC', 'NTC')	NTC	NTC
4170	EX_4hbz_e	GSMM_057	EX_glc__D_e	GSMM_259	EX_g6p_B_e	('NTC', 'NTC')	NTC	NTC
4174	EX_4hbz_e	GSMM_142	EX_glc__D_e	GSMM_259	EX_g6p_B_e	('NTC', 'NTC')	NTC	NTC
4181	EX_4hbz_e	GSMM_225	EX_glc__D_e	GSMM_259	EX_g6p_B_e	('NTC', 'NTC')	NTC	NTC
4184	EX_4hbz_e	GSMM_262	EX_glc__D_e	GSMM_259	EX_g6p_B_e	('NTC', 'NTC')	NTC	NTC
4185	EX_4hbz_e	GSMM_265	EX_glc__D_e	GSMM_259	EX_g6p_B_e	('NTC', 'NTC')	NTC	NTC
4187	EX_4hbz_e	GSMM_306	EX_glc__D_e	GSMM_259	EX_g6p_B_e	('NTC', 'NTC')	NTC	NTC
4196	EX_4hbz_e	GSMM_365	EX_glc__D_e	GSMM_259	EX_g6p_B_e	('NTC', 'NTC')	NTC	NTC
4197	EX_4hbz_e	GSMM_374	EX_glc__D_e	GSMM_259	EX_g6p_B_e	('NTC', 'NTC')	NTC	NTC
4201	EX_4hbz_e	GSMM_093	EX_pydxn_e	GSMM_259	EX_g6p_B_e	('NTC', 'NTC')	NTC	NTC
4203	EX_4hbz_e	GSMM_265	EX_pydxn_e	GSMM_259	EX_g6p_B_e	('NTC', 'NTC')	NTC	NTC
4207	EX_4hbz_e	GSMM_024	EX_cys__L_e	GSMM_259	EX_g6p_B_e	('NTC', 'NTC')	NTC	NTC
4209	EX_4hbz_e	GSMM_057	EX_cys__L_e	GSMM_259	EX_g6p_B_e	('NTC', 'NTC')	NTC	NTC
4218	EX_4hbz_e	GSMM_220	EX_cys__L_e	GSMM_259	EX_g6p_B_e	('NTC', 'NTC')	NTC	NTC
4219	EX_4hbz_e	GSMM_256	EX_cys__L_e	GSMM_259	EX_g6p_B_e	('NTC', 'NTC')	NTC	NTC
4221	EX_4hbz_e	GSMM_306	EX_cys__L_e	GSMM_259	EX_g6p_B_e	('NTC', 'NTC')	NTC	NTC
4229	EX_4hbz_e	GSMM_374	EX_cys__L_e	GSMM_259	EX_g6p_B_e	('NTC', 'NTC')	NTC	NTC
4233	EX_4hbz_e	GSMM_024	EX_pheme_e	GSMM_259	EX_g6p_B_e	('NTC', 'NTC')	NTC	NTC
4235	EX_4hbz_e	GSMM_057	EX_pheme_e	GSMM_259	EX_g6p_B_e	('NTC', 'NTC')	NTC	NTC
4240	EX_4hbz_e	GSMM_093	EX_pheme_e	GSMM_259	EX_g6p_B_e	('NTC', 'NTC')	NTC	NTC
4244	EX_4hbz_e	GSMM_142	EX_pheme_e	GSMM_259	EX_g6p_B_e	('NTC', 'NTC')	NTC	NTC
4250	EX_4hbz_e	GSMM_232	EX_pheme_e	GSMM_259	EX_g6p_B_e	('NTC', 'NTC')	NTC	NTC
4251	EX_4hbz_e	GSMM_265	EX_pheme_e	GSMM_259	EX_g6p_B_e	('NTC', 'NTC')	NTC	NTC
4266	EX_4hbz_e	GSMM_057	EX_thym_e	GSMM_259	EX_g6p_B_e	('NTC', 'NTC')	NTC	NTC
4268	EX_4hbz_e	GSMM_093	EX_thym_e	GSMM_259	EX_g6p_B_e	('NTC', 'NTC')	NTC	NTC
4269	EX_4hbz_e	GSMM_104	EX_thym_e	GSMM_259	EX_g6p_B_e	('NTC', 'NTC')	NTC	NTC
4271	EX_4hbz_e	GSMM_142	EX_thym_e	GSMM_259	EX_g6p_B_e	('NTC', 'NTC')	NTC	NTC
4275	EX_4hbz_e	GSMM_161	EX_thym_e	GSMM_259	EX_g6p_B_e	('NTC', 'NTC')	NTC	NTC
4277	EX_4hbz_e	GSMM_220	EX_thym_e	GSMM_259	EX_g6p_B_e	('NTC', 'NTC')	NTC	NTC
4278	EX_4hbz_e	GSMM_225	EX_thym_e	GSMM_259	EX_g6p_B_e	('NTC', 'NTC')	NTC	NTC
4279	EX_4hbz_e	GSMM_262	EX_thym_e	GSMM_259	EX_g6p_B_e	('NTC', 'NTC')	NTC	NTC
4280	EX_4hbz_e	GSMM_265	EX_thym_e	GSMM_259	EX_g6p_B_e	('NTC', 'NTC')	NTC	NTC
4282	EX_4hbz_e	GSMM_280	EX_thym_e	GSMM_259	EX_g6p_B_e	('NTC', 'NTC')	NTC	NTC
4290	EX_4hbz_e	GSMM_024	EX_g3pe_e	GSMM_259	EX_g6p_B_e	('NTC', 'NTC')	NTC	NTC
4295	EX_4hbz_e	GSMM_093	EX_g3pe_e	GSMM_259	EX_g6p_B_e	('NTC', 'NTC')	NTC	NTC
4297	EX_4hbz_e	GSMM_161	EX_g3pe_e	GSMM_259	EX_g6p_B_e	('NTC', 'NTC')	NTC	NTC
4304	EX_4hbz_e	GSMM_365	EX_g3pe_e	GSMM_259	EX_g6p_B_e	('NTC', 'NTC')	NTC	NTC
4309	EX_4hbz_e	GSMM_104	EX_enter_e	GSMM_259	EX_g6p_B_e	('NTC', 'NTC')	NTC	NTC
4312	EX_4hbz_e	GSMM_220	EX_enter_e	GSMM_259	EX_g6p_B_e	('NTC', 'NTC')	NTC	NTC
4314	EX_4hbz_e	GSMM_232	EX_enter_e	GSMM_259	EX_g6p_B_e	('NTC', 'NTC')	NTC	NTC
4315	EX_4hbz_e	GSMM_261	EX_enter_e	GSMM_259	EX_g6p_B_e	('NTC', 'NTC')	NTC	NTC
4317	EX_4hbz_e	GSMM_374	EX_enter_e	GSMM_259	EX_g6p_B_e	('NTC', 'NTC')	NTC	NTC
4327	EX_4hbz_e	GSMM_057	EX_ppap_e	GSMM_259	EX_g6p_B_e	('NTC', 'NTC')	NTC	NTC
4329	EX_4hbz_e	GSMM_104	EX_ppap_e	GSMM_259	EX_g6p_B_e	('NTC', 'NTC')	NTC	NTC
4336	EX_4hbz_e	GSMM_232	EX_ppap_e	GSMM_259	EX_g6p_B_e	('NTC', 'NTC')	NTC	NTC
4338	EX_4hbz_e	GSMM_256	EX_ppap_e	GSMM_259	EX_g6p_B_e	('NTC', 'NTC')	NTC	NTC
4339	EX_4hbz_e	GSMM_262	EX_ppap_e	GSMM_259	EX_g6p_B_e	('NTC', 'NTC')	NTC	NTC
4340	EX_4hbz_e	GSMM_306	EX_ppap_e	GSMM_259	EX_g6p_B_e	('NTC', 'NTC')	NTC	NTC
4343	EX_4hbz_e	GSMM_365	EX_ppap_e	GSMM_259	EX_g6p_B_e	('NTC', 'NTC')	NTC	NTC
4348	EX_4hbz_e	GSMM_024	EX_4hba_e	GSMM_259	EX_g6p_B_e	('NTC', 'NTC')	NTC	NTC
4353	EX_4hbz_e	GSMM_057	EX_4hba_e	GSMM_259	EX_g6p_B_e	('NTC', 'NTC')	NTC	NTC
4356	EX_4hbz_e	GSMM_104	EX_4hba_e	GSMM_259	EX_g6p_B_e	('NTC', 'NTC')	NTC	NTC
4360	EX_4hbz_e	GSMM_142	EX_4hba_e	GSMM_259	EX_g6p_B_e	('NTC', 'NTC')	NTC	NTC
4364	EX_4hbz_e	GSMM_262	EX_4hba_e	GSMM_259	EX_g6p_B_e	('NTC', 'NTC')	NTC	NTC
4367	EX_4hbz_e	GSMM_280	EX_4hba_e	GSMM_259	EX_g6p_B_e	('NTC', 'NTC')	NTC	NTC
4375	EX_4hbz_e	GSMM_365	EX_4hba_e	GSMM_259	EX_g6p_B_e	('NTC', 'NTC')	NTC	NTC
4381	EX_4hbz_e	GSMM_057	EX_4abut_e	GSMM_259	EX_g6p_B_e	('NTC', 'NTC')	NTC	NTC
4388	EX_4hbz_e	GSMM_261	EX_4abut_e	GSMM_259	EX_g6p_B_e	('NTC', 'NTC')	NTC	NTC
4390	EX_4hbz_e	GSMM_306	EX_4abut_e	GSMM_259	EX_g6p_B_e	('NTC', 'NTC')	NTC	NTC
4395	EX_4hbz_e	GSMM_024	EX_lys__L_e	GSMM_259	EX_g6p_B_e	('NTC', 'NTC')	NTC	NTC
4400	EX_4hbz_e	GSMM_104	EX_lys__L_e	GSMM_259	EX_g6p_B_e	('NTC', 'NTC')	NTC	NTC
4403	EX_4hbz_e	GSMM_142	EX_lys__L_e	GSMM_259	EX_g6p_B_e	('NTC', 'NTC')	NTC	NTC
4406	EX_4hbz_e	GSMM_232	EX_lys__L_e	GSMM_259	EX_g6p_B_e	('NTC', 'NTC')	NTC	NTC
4407	EX_4hbz_e	GSMM_262	EX_lys__L_e	GSMM_259	EX_g6p_B_e	('NTC', 'NTC')	NTC	NTC
4410	EX_4hbz_e	GSMM_024	EX_indole_e	GSMM_259	EX_g6p_B_e	('NTC', 'NTC')	NTC	NTC
4415	EX_4hbz_e	GSMM_104	EX_indole_e	GSMM_259	EX_g6p_B_e	('NTC', 'NTC')	NTC	NTC
4419	EX_4hbz_e	GSMM_142	EX_indole_e	GSMM_259	EX_g6p_B_e	('NTC', 'NTC')	NTC	NTC
4426	EX_4hbz_e	GSMM_232	EX_indole_e	GSMM_259	EX_g6p_B_e	('NTC', 'NTC')	NTC	NTC
4427	EX_4hbz_e	GSMM_256	EX_indole_e	GSMM_259	EX_g6p_B_e	('NTC', 'NTC')	NTC	NTC
4428	EX_4hbz_e	GSMM_262	EX_indole_e	GSMM_259	EX_g6p_B_e	('NTC', 'NTC')	NTC	NTC
4429	EX_4hbz_e	GSMM_265	EX_indole_e	GSMM_259	EX_g6p_B_e	('NTC', 'NTC')	NTC	NTC
4431	EX_4hbz_e	GSMM_365	EX_indole_e	GSMM_259	EX_g6p_B_e	('NTC', 'NTC')	NTC	NTC
4432	EX_4hbz_e	GSMM_374	EX_indole_e	GSMM_259	EX_g6p_B_e	('NTC', 'NTC')	NTC	NTC
4439	EX_4hbz_e	GSMM_024	EX_g3pg_e	GSMM_259	EX_g6p_B_e	('NTC', 'NTC')	NTC	NTC
4441	EX_4hbz_e	GSMM_024	EX_glcur_e	GSMM_259	EX_g6p_B_e	('NTC', 'NTC')	NTC	NTC
4442	EX_4hbz_e	GSMM_024	EX_arg__L_e	GSMM_259	EX_g6p_B_e	('NTC', 'NTC')	NTC	NTC
4444	EX_4hbz_e	GSMM_104	EX_arg__L_e	GSMM_259	EX_g6p_B_e	('NTC', 'NTC')	NTC	NTC
4447	EX_4hbz_e	GSMM_142	EX_arg__L_e	GSMM_259	EX_g6p_B_e	('NTC', 'NTC')	NTC	NTC
4451	EX_4hbz_e	GSMM_093	EX_uri_e	GSMM_259	EX_g6p_B_e	('NTC', 'NTC')	NTC	NTC
4452	EX_4hbz_e	GSMM_142	EX_uri_e	GSMM_259	EX_g6p_B_e	('NTC', 'NTC')	NTC	NTC
4456	EX_4hbz_e	GSMM_057	EX_leu__L_e	GSMM_259	EX_g6p_B_e	('NTC', 'NTC')	NTC	NTC
4457	EX_4hbz_e	GSMM_225	EX_leu__L_e	GSMM_259	EX_g6p_B_e	('NTC', 'NTC')	NTC	NTC
4462	EX_4hbz_e	GSMM_093	EX_cytd_e	GSMM_259	EX_g6p_B_e	('NTC', 'NTC')	NTC	NTC
4463	EX_4hbz_e	GSMM_142	EX_cytd_e	GSMM_259	EX_g6p_B_e	('NTC', 'NTC')	NTC	NTC
4468	EX_4hbz_e	GSMM_365	EX_cytd_e	GSMM_259	EX_g6p_B_e	('NTC', 'NTC')	NTC	NTC
4470	EX_4hbz_e	GSMM_093	EX_adn_e	GSMM_259	EX_g6p_B_e	('NTC', 'NTC')	NTC	NTC
4476	EX_4hbz_e	GSMM_365	EX_adn_e	GSMM_259	EX_g6p_B_e	('NTC', 'NTC')	NTC	NTC
4478	EX_4hbz_e	GSMM_093	EX_gsn_e	GSMM_259	EX_g6p_B_e	('NTC', 'NTC')	NTC	NTC
4479	EX_4hbz_e	GSMM_142	EX_gsn_e	GSMM_259	EX_g6p_B_e	('NTC', 'NTC')	NTC	NTC
4484	EX_4hbz_e	GSMM_365	EX_gsn_e	GSMM_259	EX_g6p_B_e	('NTC', 'NTC')	NTC	NTC
4488	EX_4hbz_e	GSMM_232	EX_glyb_e	GSMM_259	EX_g6p_B_e	('NTC', 'NTC')	NTC	NTC
4489	EX_4hbz_e	GSMM_265	EX_glyb_e	GSMM_259	EX_g6p_B_e	('NTC', 'NTC')	NTC	NTC
4495	EX_4hbz_e	GSMM_093	EX_2dhglcn_e	GSMM_259	EX_g6p_B_e	('NTC', 'NTC')	NTC	NTC
4497	EX_4hbz_e	GSMM_256	EX_2dhglcn_e	GSMM_259	EX_g6p_B_e	('NTC', 'NTC')	NTC	NTC
4500	EX_4hbz_e	GSMM_374	EX_2dhglcn_e	GSMM_259	EX_g6p_B_e	('NTC', 'NTC')	NTC	NTC
4506	EX_4hbz_e	GSMM_093	EX_thymd_e	GSMM_259	EX_g6p_B_e	('NTC', 'NTC')	NTC	NTC
4508	EX_4hbz_e	GSMM_261	EX_thymd_e	GSMM_259	EX_g6p_B_e	('NTC', 'NTC')	NTC	NTC
4516	EX_4hbz_e	GSMM_265	EX_lcts_e	GSMM_259	EX_g6p_B_e	('NTC', 'NTC')	NTC	NTC
4517	EX_4hbz_e	GSMM_220	EX_salchs4_e	GSMM_259	EX_g6p_B_e	('NTC', 'NTC')	NTC	NTC
4528	EX_4hbz_e	GSMM_024	EX_acald_e	GSMM_239	EX_ppal_e	('NTC', 'NTC')	NTC	NTC
4537	EX_4hbz_e	GSMM_057	EX_acald_e	GSMM_239	EX_ppal_e	('NTC', 'NTC')	NTC	NTC
4542	EX_4hbz_e	GSMM_093	EX_acald_e	GSMM_239	EX_ppal_e	('NTC', 'NTC')	NTC	NTC
4544	EX_4hbz_e	GSMM_104	EX_acald_e	GSMM_239	EX_ppal_e	('NTC', 'NTC')	NTC	NTC
4550	EX_4hbz_e	GSMM_142	EX_acald_e	GSMM_239	EX_ppal_e	('NTC', 'NTC')	NTC	NTC
4555	EX_4hbz_e	GSMM_161	EX_acald_e	GSMM_239	EX_ppal_e	('NTC', 'NTC')	NTC	NTC
4561	EX_4hbz_e	GSMM_220	EX_acald_e	GSMM_239	EX_ppal_e	('NTC', 'NTC')	NTC	NTC
4562	EX_4hbz_e	GSMM_225	EX_acald_e	GSMM_239	EX_ppal_e	('NTC', 'NTC')	NTC	NTC
4564	EX_4hbz_e	GSMM_232	EX_acald_e	GSMM_239	EX_ppal_e	('NTC', 'NTC')	NTC	NTC
4566	EX_4hbz_e	GSMM_256	EX_acald_e	GSMM_239	EX_ppal_e	('NTC', 'NTC')	NTC	NTC
4567	EX_4hbz_e	GSMM_261	EX_acald_e	GSMM_239	EX_ppal_e	('NTC', 'NTC')	NTC	NTC
4568	EX_4hbz_e	GSMM_262	EX_acald_e	GSMM_239	EX_ppal_e	('NTC', 'NTC')	NTC	NTC
4569	EX_4hbz_e	GSMM_265	EX_acald_e	GSMM_239	EX_ppal_e	('NTC', 'NTC')	NTC	NTC
4572	EX_4hbz_e	GSMM_306	EX_acald_e	GSMM_239	EX_ppal_e	('NTC', 'NTC')	NTC	NTC
4580	EX_4hbz_e	GSMM_365	EX_acald_e	GSMM_239	EX_ppal_e	('NTC', 'NTC')	NTC	NTC
4581	EX_4hbz_e	GSMM_374	EX_acald_e	GSMM_239	EX_ppal_e	('NTC', 'NTC')	NTC	NTC
4588	EX_4hbz_e	GSMM_024	EX_5drib_e	GSMM_239	EX_ppal_e	('NTC', 'NTC')	NTC	NTC
4595	EX_4hbz_e	GSMM_057	EX_5drib_e	GSMM_239	EX_ppal_e	('NTC', 'NTC')	NTC	NTC
4600	EX_4hbz_e	GSMM_093	EX_5drib_e	GSMM_239	EX_ppal_e	('NTC', 'NTC')	NTC	NTC
4602	EX_4hbz_e	GSMM_104	EX_5drib_e	GSMM_239	EX_ppal_e	('NTC', 'NTC')	NTC	NTC
4608	EX_4hbz_e	GSMM_142	EX_5drib_e	GSMM_239	EX_ppal_e	('NTC', 'NTC')	NTC	NTC
4617	EX_4hbz_e	GSMM_220	EX_5drib_e	GSMM_239	EX_ppal_e	('NTC', 'NTC')	NTC	NTC
4618	EX_4hbz_e	GSMM_225	EX_5drib_e	GSMM_239	EX_ppal_e	('NTC', 'NTC')	NTC	NTC
4620	EX_4hbz_e	GSMM_232	EX_5drib_e	GSMM_239	EX_ppal_e	('NTC', 'NTC')	NTC	NTC
4622	EX_4hbz_e	GSMM_256	EX_5drib_e	GSMM_239	EX_ppal_e	('NTC', 'NTC')	NTC	NTC
4623	EX_4hbz_e	GSMM_261	EX_5drib_e	GSMM_239	EX_ppal_e	('NTC', 'NTC')	NTC	NTC
4624	EX_4hbz_e	GSMM_262	EX_5drib_e	GSMM_239	EX_ppal_e	('NTC', 'NTC')	NTC	NTC
4625	EX_4hbz_e	GSMM_265	EX_5drib_e	GSMM_239	EX_ppal_e	('NTC', 'NTC')	NTC	NTC
4628	EX_4hbz_e	GSMM_306	EX_5drib_e	GSMM_239	EX_ppal_e	('NTC', 'NTC')	NTC	NTC
4639	EX_4hbz_e	GSMM_365	EX_5drib_e	GSMM_239	EX_ppal_e	('NTC', 'NTC')	NTC	NTC
4640	EX_4hbz_e	GSMM_374	EX_5drib_e	GSMM_239	EX_ppal_e	('NTC', 'NTC')	NTC	NTC
4649	EX_4hbz_e	GSMM_024	EX_etoh_e	GSMM_239	EX_ppal_e	('NTC', 'NTC')	NTC	NTC
4658	EX_4hbz_e	GSMM_057	EX_etoh_e	GSMM_239	EX_ppal_e	('NTC', 'NTC')	NTC	NTC
4661	EX_4hbz_e	GSMM_093	EX_etoh_e	GSMM_239	EX_ppal_e	('NTC', 'NTC')	NTC	NTC
4663	EX_4hbz_e	GSMM_104	EX_etoh_e	GSMM_239	EX_ppal_e	('NTC', 'NTC')	NTC	NTC
4669	EX_4hbz_e	GSMM_142	EX_etoh_e	GSMM_239	EX_ppal_e	('NTC', 'NTC')	NTC	NTC
4672	EX_4hbz_e	GSMM_161	EX_etoh_e	GSMM_239	EX_ppal_e	('NTC', 'NTC')	NTC	NTC
4678	EX_4hbz_e	GSMM_220	EX_etoh_e	GSMM_239	EX_ppal_e	('NTC', 'NTC')	NTC	NTC
4679	EX_4hbz_e	GSMM_225	EX_etoh_e	GSMM_239	EX_ppal_e	('NTC', 'NTC')	NTC	NTC
4681	EX_4hbz_e	GSMM_232	EX_etoh_e	GSMM_239	EX_ppal_e	('NTC', 'NTC')	NTC	NTC
4683	EX_4hbz_e	GSMM_256	EX_etoh_e	GSMM_239	EX_ppal_e	('NTC', 'NTC')	NTC	NTC
4684	EX_4hbz_e	GSMM_261	EX_etoh_e	GSMM_239	EX_ppal_e	('NTC', 'NTC')	NTC	NTC
4685	EX_4hbz_e	GSMM_262	EX_etoh_e	GSMM_239	EX_ppal_e	('NTC', 'NTC')	NTC	NTC
4686	EX_4hbz_e	GSMM_265	EX_etoh_e	GSMM_239	EX_ppal_e	('NTC', 'NTC')	NTC	NTC
4688	EX_4hbz_e	GSMM_280	EX_etoh_e	GSMM_239	EX_ppal_e	('NTC', 'NTC')	NTC	NTC
4699	EX_4hbz_e	GSMM_365	EX_etoh_e	GSMM_239	EX_ppal_e	('NTC', 'NTC')	NTC	NTC
4700	EX_4hbz_e	GSMM_374	EX_etoh_e	GSMM_239	EX_ppal_e	('NTC', 'NTC')	NTC	NTC
4711	EX_4hbz_e	GSMM_104	EX_glyc3p_e	GSMM_239	EX_ppal_e	('NTC', 'NTC')	NTC	NTC
4715	EX_4hbz_e	GSMM_142	EX_glyc3p_e	GSMM_239	EX_ppal_e	('NTC', 'NTC')	NTC	NTC
4721	EX_4hbz_e	GSMM_220	EX_glyc3p_e	GSMM_239	EX_ppal_e	('NTC', 'NTC')	NTC	NTC
4722	EX_4hbz_e	GSMM_225	EX_glyc3p_e	GSMM_239	EX_ppal_e	('NTC', 'NTC')	NTC	NTC
4724	EX_4hbz_e	GSMM_256	EX_glyc3p_e	GSMM_239	EX_ppal_e	('NTC', 'NTC')	NTC	NTC
4725	EX_4hbz_e	GSMM_261	EX_glyc3p_e	GSMM_239	EX_ppal_e	('NTC', 'NTC')	NTC	NTC
4726	EX_4hbz_e	GSMM_262	EX_glyc3p_e	GSMM_239	EX_ppal_e	('NTC', 'NTC')	NTC	NTC
4727	EX_4hbz_e	GSMM_265	EX_glyc3p_e	GSMM_239	EX_ppal_e	('NTC', 'NTC')	NTC	NTC
4729	EX_4hbz_e	GSMM_280	EX_glyc3p_e	GSMM_239	EX_ppal_e	('NTC', 'NTC')	NTC	NTC
4735	EX_4hbz_e	GSMM_365	EX_glyc3p_e	GSMM_239	EX_ppal_e	('NTC', 'NTC')	NTC	NTC
4746	EX_4hbz_e	GSMM_104	EX_5mdru1p_e	GSMM_239	EX_ppal_e	('NTC', 'NTC')	NTC	NTC
4756	EX_4hbz_e	GSMM_220	EX_5mdru1p_e	GSMM_239	EX_ppal_e	('NTC', 'NTC')	NTC	NTC
4758	EX_4hbz_e	GSMM_232	EX_5mdru1p_e	GSMM_239	EX_ppal_e	('NTC', 'NTC')	NTC	NTC
4759	EX_4hbz_e	GSMM_261	EX_5mdru1p_e	GSMM_239	EX_ppal_e	('NTC', 'NTC')	NTC	NTC
4764	EX_4hbz_e	GSMM_365	EX_5mdru1p_e	GSMM_239	EX_ppal_e	('NTC', 'NTC')	NTC	NTC
4770	EX_4hbz_e	GSMM_024	EX_ptrc_e	GSMM_239	EX_ppal_e	('NTC', 'NTC')	NTC	NTC
4778	EX_4hbz_e	GSMM_057	EX_ptrc_e	GSMM_239	EX_ppal_e	('NTC', 'NTC')	NTC	NTC
4785	EX_4hbz_e	GSMM_142	EX_ptrc_e	GSMM_239	EX_ppal_e	('NTC', 'NTC')	NTC	NTC
4789	EX_4hbz_e	GSMM_161	EX_ptrc_e	GSMM_239	EX_ppal_e	('NTC', 'NTC')	NTC	NTC
4795	EX_4hbz_e	GSMM_220	EX_ptrc_e	GSMM_239	EX_ppal_e	('NTC', 'NTC')	NTC	NTC
4796	EX_4hbz_e	GSMM_225	EX_ptrc_e	GSMM_239	EX_ppal_e	('NTC', 'NTC')	NTC	NTC
4799	EX_4hbz_e	GSMM_256	EX_ptrc_e	GSMM_239	EX_ppal_e	('NTC', 'NTC')	NTC	NTC
4800	EX_4hbz_e	GSMM_261	EX_ptrc_e	GSMM_239	EX_ppal_e	('NTC', 'NTC')	NTC	NTC
4801	EX_4hbz_e	GSMM_262	EX_ptrc_e	GSMM_239	EX_ppal_e	('NTC', 'NTC')	NTC	NTC
4803	EX_4hbz_e	GSMM_306	EX_ptrc_e	GSMM_239	EX_ppal_e	('NTC', 'NTC')	NTC	NTC
4813	EX_4hbz_e	GSMM_365	EX_ptrc_e	GSMM_239	EX_ppal_e	('NTC', 'NTC')	NTC	NTC
4814	EX_4hbz_e	GSMM_374	EX_ptrc_e	GSMM_239	EX_ppal_e	('NTC', 'NTC')	NTC	NTC
4820	EX_4hbz_e	GSMM_024	EX_rib__D_e	GSMM_239	EX_ppal_e	('NTC', 'NTC')	NTC	NTC
4827	EX_4hbz_e	GSMM_057	EX_rib__D_e	GSMM_239	EX_ppal_e	('NTC', 'NTC')	NTC	NTC
4830	EX_4hbz_e	GSMM_093	EX_rib__D_e	GSMM_239	EX_ppal_e	('NTC', 'NTC')	NTC	NTC
4832	EX_4hbz_e	GSMM_104	EX_rib__D_e	GSMM_239	EX_ppal_e	('NTC', 'NTC')	NTC	NTC
4836	EX_4hbz_e	GSMM_142	EX_rib__D_e	GSMM_239	EX_ppal_e	('NTC', 'NTC')	NTC	NTC
4843	EX_4hbz_e	GSMM_220	EX_rib__D_e	GSMM_239	EX_ppal_e	('NTC', 'NTC')	NTC	NTC
4844	EX_4hbz_e	GSMM_225	EX_rib__D_e	GSMM_239	EX_ppal_e	('NTC', 'NTC')	NTC	NTC
4846	EX_4hbz_e	GSMM_232	EX_rib__D_e	GSMM_239	EX_ppal_e	('NTC', 'NTC')	NTC	NTC
4847	EX_4hbz_e	GSMM_256	EX_rib__D_e	GSMM_239	EX_ppal_e	('NTC', 'NTC')	NTC	NTC
4848	EX_4hbz_e	GSMM_262	EX_rib__D_e	GSMM_239	EX_ppal_e	('NTC', 'NTC')	NTC	NTC
4849	EX_4hbz_e	GSMM_265	EX_rib__D_e	GSMM_239	EX_ppal_e	('NTC', 'NTC')	NTC	NTC
4851	EX_4hbz_e	GSMM_280	EX_rib__D_e	GSMM_239	EX_ppal_e	('NTC', 'NTC')	NTC	NTC
4852	EX_4hbz_e	GSMM_306	EX_rib__D_e	GSMM_239	EX_ppal_e	('NTC', 'NTC')	NTC	NTC
4864	EX_4hbz_e	GSMM_365	EX_rib__D_e	GSMM_239	EX_ppal_e	('NTC', 'NTC')	NTC	NTC
4865	EX_4hbz_e	GSMM_374	EX_rib__D_e	GSMM_239	EX_ppal_e	('NTC', 'NTC')	NTC	NTC
4869	EX_4hbz_e	GSMM_024	EX_actn__R_e	GSMM_239	EX_ppal_e	('NTC', 'NTC')	NTC	NTC
4877	EX_4hbz_e	GSMM_104	EX_actn__R_e	GSMM_239	EX_ppal_e	('NTC', 'NTC')	NTC	NTC
4884	EX_4hbz_e	GSMM_262	EX_actn__R_e	GSMM_239	EX_ppal_e	('NTC', 'NTC')	NTC	NTC
4885	EX_4hbz_e	GSMM_280	EX_actn__R_e	GSMM_239	EX_ppal_e	('NTC', 'NTC')	NTC	NTC
4892	EX_4hbz_e	GSMM_365	EX_actn__R_e	GSMM_239	EX_ppal_e	('NTC', 'NTC')	NTC	NTC
4893	EX_4hbz_e	GSMM_374	EX_actn__R_e	GSMM_239	EX_ppal_e	('NTC', 'NTC')	NTC	NTC
4900	EX_4hbz_e	GSMM_024	EX_spmd_e	GSMM_239	EX_ppal_e	('NTC', 'NTC')	NTC	NTC
4912	EX_4hbz_e	GSMM_104	EX_spmd_e	GSMM_239	EX_ppal_e	('NTC', 'NTC')	NTC	NTC
4917	EX_4hbz_e	GSMM_142	EX_spmd_e	GSMM_239	EX_ppal_e	('NTC', 'NTC')	NTC	NTC
4921	EX_4hbz_e	GSMM_161	EX_spmd_e	GSMM_239	EX_ppal_e	('NTC', 'NTC')	NTC	NTC
4926	EX_4hbz_e	GSMM_220	EX_spmd_e	GSMM_239	EX_ppal_e	('NTC', 'NTC')	NTC	NTC
4927	EX_4hbz_e	GSMM_225	EX_spmd_e	GSMM_239	EX_ppal_e	('NTC', 'NTC')	NTC	NTC
4929	EX_4hbz_e	GSMM_232	EX_spmd_e	GSMM_239	EX_ppal_e	('NTC', 'NTC')	NTC	NTC
4930	EX_4hbz_e	GSMM_256	EX_spmd_e	GSMM_239	EX_ppal_e	('NTC', 'NTC')	NTC	NTC
4931	EX_4hbz_e	GSMM_261	EX_spmd_e	GSMM_239	EX_ppal_e	('NTC', 'NTC')	NTC	NTC
4932	EX_4hbz_e	GSMM_265	EX_spmd_e	GSMM_239	EX_ppal_e	('NTC', 'NTC')	NTC	NTC
4940	EX_4hbz_e	GSMM_365	EX_spmd_e	GSMM_239	EX_ppal_e	('NTC', 'NTC')	NTC	NTC
4941	EX_4hbz_e	GSMM_374	EX_spmd_e	GSMM_239	EX_ppal_e	('NTC', 'NTC')	NTC	NTC
4948	EX_4hbz_e	GSMM_093	EX_succ_e	GSMM_239	EX_ppal_e	('NTC', 'NTC')	NTC	NTC
4950	EX_4hbz_e	GSMM_225	EX_succ_e	GSMM_239	EX_ppal_e	('NTC', 'NTC')	NTC	NTC
4960	EX_4hbz_e	GSMM_024	EX_glyc_e	GSMM_239	EX_ppal_e	('NTC', 'NTC')	NTC	NTC
4969	EX_4hbz_e	GSMM_057	EX_glyc_e	GSMM_239	EX_ppal_e	('NTC', 'NTC')	NTC	NTC
4973	EX_4hbz_e	GSMM_093	EX_glyc_e	GSMM_239	EX_ppal_e	('NTC', 'NTC')	NTC	NTC
4975	EX_4hbz_e	GSMM_104	EX_glyc_e	GSMM_239	EX_ppal_e	('NTC', 'NTC')	NTC	NTC
4985	EX_4hbz_e	GSMM_161	EX_glyc_e	GSMM_239	EX_ppal_e	('NTC', 'NTC')	NTC	NTC
4991	EX_4hbz_e	GSMM_220	EX_glyc_e	GSMM_239	EX_ppal_e	('NTC', 'NTC')	NTC	NTC
4992	EX_4hbz_e	GSMM_225	EX_glyc_e	GSMM_239	EX_ppal_e	('NTC', 'NTC')	NTC	NTC
4994	EX_4hbz_e	GSMM_232	EX_glyc_e	GSMM_239	EX_ppal_e	('NTC', 'NTC')	NTC	NTC
4996	EX_4hbz_e	GSMM_256	EX_glyc_e	GSMM_239	EX_ppal_e	('NTC', 'NTC')	NTC	NTC
4997	EX_4hbz_e	GSMM_261	EX_glyc_e	GSMM_239	EX_ppal_e	('NTC', 'NTC')	NTC	NTC
4998	EX_4hbz_e	GSMM_262	EX_glyc_e	GSMM_239	EX_ppal_e	('NTC', 'NTC')	NTC	NTC
4999	EX_4hbz_e	GSMM_265	EX_glyc_e	GSMM_239	EX_ppal_e	('NTC', 'NTC')	NTC	NTC
5002	EX_4hbz_e	GSMM_280	EX_glyc_e	GSMM_239	EX_ppal_e	('NTC', 'NTC')	NTC	NTC
5014	EX_4hbz_e	GSMM_365	EX_glyc_e	GSMM_239	EX_ppal_e	('NTC', 'NTC')	NTC	NTC
5015	EX_4hbz_e	GSMM_374	EX_glyc_e	GSMM_239	EX_ppal_e	('NTC', 'NTC')	NTC	NTC
5024	EX_4hbz_e	GSMM_024	EX_fe3pyovd_kt_e	GSMM_239	EX_ppal_e	('NTC', 'NTC')	NTC	NTC
5033	EX_4hbz_e	GSMM_057	EX_fe3pyovd_kt_e	GSMM_239	EX_ppal_e	('NTC', 'NTC')	NTC	NTC
5038	EX_4hbz_e	GSMM_093	EX_fe3pyovd_kt_e	GSMM_239	EX_ppal_e	('NTC', 'NTC')	NTC	NTC
5040	EX_4hbz_e	GSMM_104	EX_fe3pyovd_kt_e	GSMM_239	EX_ppal_e	('NTC', 'NTC')	NTC	NTC
5046	EX_4hbz_e	GSMM_142	EX_fe3pyovd_kt_e	GSMM_239	EX_ppal_e	('NTC', 'NTC')	NTC	NTC
5051	EX_4hbz_e	GSMM_161	EX_fe3pyovd_kt_e	GSMM_239	EX_ppal_e	('NTC', 'NTC')	NTC	NTC
5058	EX_4hbz_e	GSMM_220	EX_fe3pyovd_kt_e	GSMM_239	EX_ppal_e	('NTC', 'NTC')	NTC	NTC
5059	EX_4hbz_e	GSMM_225	EX_fe3pyovd_kt_e	GSMM_239	EX_ppal_e	('NTC', 'NTC')	NTC	NTC
5061	EX_4hbz_e	GSMM_232	EX_fe3pyovd_kt_e	GSMM_239	EX_ppal_e	('NTC', 'NTC')	NTC	NTC
5063	EX_4hbz_e	GSMM_256	EX_fe3pyovd_kt_e	GSMM_239	EX_ppal_e	('NTC', 'NTC')	NTC	NTC
5064	EX_4hbz_e	GSMM_261	EX_fe3pyovd_kt_e	GSMM_239	EX_ppal_e	('NTC', 'NTC')	NTC	NTC
5065	EX_4hbz_e	GSMM_262	EX_fe3pyovd_kt_e	GSMM_239	EX_ppal_e	('NTC', 'NTC')	NTC	NTC
5066	EX_4hbz_e	GSMM_265	EX_fe3pyovd_kt_e	GSMM_239	EX_ppal_e	('NTC', 'NTC')	NTC	NTC
5069	EX_4hbz_e	GSMM_280	EX_fe3pyovd_kt_e	GSMM_239	EX_ppal_e	('NTC', 'NTC')	NTC	NTC
5070	EX_4hbz_e	GSMM_306	EX_fe3pyovd_kt_e	GSMM_239	EX_ppal_e	('NTC', 'NTC')	NTC	NTC
5082	EX_4hbz_e	GSMM_365	EX_fe3pyovd_kt_e	GSMM_239	EX_ppal_e	('NTC', 'NTC')	NTC	NTC
5083	EX_4hbz_e	GSMM_374	EX_fe3pyovd_kt_e	GSMM_239	EX_ppal_e	('NTC', 'NTC')	NTC	NTC
5092	EX_4hbz_e	GSMM_024	EX_pyovd_kt_e	GSMM_239	EX_ppal_e	('NTC', 'NTC')	NTC	NTC
5101	EX_4hbz_e	GSMM_057	EX_pyovd_kt_e	GSMM_239	EX_ppal_e	('NTC', 'NTC')	NTC	NTC
5106	EX_4hbz_e	GSMM_093	EX_pyovd_kt_e	GSMM_239	EX_ppal_e	('NTC', 'NTC')	NTC	NTC
5108	EX_4hbz_e	GSMM_104	EX_pyovd_kt_e	GSMM_239	EX_ppal_e	('NTC', 'NTC')	NTC	NTC
5114	EX_4hbz_e	GSMM_142	EX_pyovd_kt_e	GSMM_239	EX_ppal_e	('NTC', 'NTC')	NTC	NTC
5119	EX_4hbz_e	GSMM_161	EX_pyovd_kt_e	GSMM_239	EX_ppal_e	('NTC', 'NTC')	NTC	NTC
5126	EX_4hbz_e	GSMM_220	EX_pyovd_kt_e	GSMM_239	EX_ppal_e	('NTC', 'NTC')	NTC	NTC
5127	EX_4hbz_e	GSMM_225	EX_pyovd_kt_e	GSMM_239	EX_ppal_e	('NTC', 'NTC')	NTC	NTC
5129	EX_4hbz_e	GSMM_232	EX_pyovd_kt_e	GSMM_239	EX_ppal_e	('NTC', 'NTC')	NTC	NTC
5131	EX_4hbz_e	GSMM_256	EX_pyovd_kt_e	GSMM_239	EX_ppal_e	('NTC', 'NTC')	NTC	NTC
5132	EX_4hbz_e	GSMM_261	EX_pyovd_kt_e	GSMM_239	EX_ppal_e	('NTC', 'NTC')	NTC	NTC
5133	EX_4hbz_e	GSMM_262	EX_pyovd_kt_e	GSMM_239	EX_ppal_e	('NTC', 'NTC')	NTC	NTC
5134	EX_4hbz_e	GSMM_265	EX_pyovd_kt_e	GSMM_239	EX_ppal_e	('NTC', 'NTC')	NTC	NTC
5137	EX_4hbz_e	GSMM_280	EX_pyovd_kt_e	GSMM_239	EX_ppal_e	('NTC', 'NTC')	NTC	NTC
5138	EX_4hbz_e	GSMM_306	EX_pyovd_kt_e	GSMM_239	EX_ppal_e	('NTC', 'NTC')	NTC	NTC
5150	EX_4hbz_e	GSMM_365	EX_pyovd_kt_e	GSMM_239	EX_ppal_e	('NTC', 'NTC')	NTC	NTC
5151	EX_4hbz_e	GSMM_374	EX_pyovd_kt_e	GSMM_239	EX_ppal_e	('NTC', 'NTC')	NTC	NTC
5157	EX_4hbz_e	GSMM_104	EX_cellb_e	GSMM_239	EX_ppal_e	('NTC', 'NTC')	NTC	NTC
5166	EX_4hbz_e	GSMM_024	EX_ser__L_e	GSMM_239	EX_ppal_e	('NTC', 'NTC')	NTC	NTC
5172	EX_4hbz_e	GSMM_057	EX_ser__L_e	GSMM_239	EX_ppal_e	('NTC', 'NTC')	NTC	NTC
5173	EX_4hbz_e	GSMM_104	EX_ser__L_e	GSMM_239	EX_ppal_e	('NTC', 'NTC')	NTC	NTC
5176	EX_4hbz_e	GSMM_142	EX_ser__L_e	GSMM_239	EX_ppal_e	('NTC', 'NTC')	NTC	NTC
5182	EX_4hbz_e	GSMM_220	EX_ser__L_e	GSMM_239	EX_ppal_e	('NTC', 'NTC')	NTC	NTC
5183	EX_4hbz_e	GSMM_225	EX_ser__L_e	GSMM_239	EX_ppal_e	('NTC', 'NTC')	NTC	NTC
5185	EX_4hbz_e	GSMM_261	EX_ser__L_e	GSMM_239	EX_ppal_e	('NTC', 'NTC')	NTC	NTC
5186	EX_4hbz_e	GSMM_262	EX_ser__L_e	GSMM_239	EX_ppal_e	('NTC', 'NTC')	NTC	NTC
5187	EX_4hbz_e	GSMM_265	EX_ser__L_e	GSMM_239	EX_ppal_e	('NTC', 'NTC')	NTC	NTC
5189	EX_4hbz_e	GSMM_280	EX_ser__L_e	GSMM_239	EX_ppal_e	('NTC', 'NTC')	NTC	NTC
5196	EX_4hbz_e	GSMM_365	EX_ser__L_e	GSMM_239	EX_ppal_e	('NTC', 'NTC')	NTC	NTC
5209	EX_4hbz_e	GSMM_104	EX_oxa_e	GSMM_239	EX_ppal_e	('NTC', 'NTC')	NTC	NTC
5213	EX_4hbz_e	GSMM_142	EX_oxa_e	GSMM_239	EX_ppal_e	('NTC', 'NTC')	NTC	NTC
5215	EX_4hbz_e	GSMM_161	EX_oxa_e	GSMM_239	EX_ppal_e	('NTC', 'NTC')	NTC	NTC
5219	EX_4hbz_e	GSMM_220	EX_oxa_e	GSMM_239	EX_ppal_e	('NTC', 'NTC')	NTC	NTC
5220	EX_4hbz_e	GSMM_225	EX_oxa_e	GSMM_239	EX_ppal_e	('NTC', 'NTC')	NTC	NTC
5221	EX_4hbz_e	GSMM_232	EX_oxa_e	GSMM_239	EX_ppal_e	('NTC', 'NTC')	NTC	NTC
5222	EX_4hbz_e	GSMM_265	EX_oxa_e	GSMM_239	EX_ppal_e	('NTC', 'NTC')	NTC	NTC
5223	EX_4hbz_e	GSMM_280	EX_oxa_e	GSMM_239	EX_ppal_e	('NTC', 'NTC')	NTC	NTC
5224	EX_4hbz_e	GSMM_306	EX_oxa_e	GSMM_239	EX_ppal_e	('NTC', 'NTC')	NTC	NTC
5229	EX_4hbz_e	GSMM_365	EX_oxa_e	GSMM_239	EX_ppal_e	('NTC', 'NTC')	NTC	NTC
5235	EX_4hbz_e	GSMM_024	EX_anhgm_e	GSMM_239	EX_ppal_e	('NTC', 'NTC')	NTC	NTC
5239	EX_4hbz_e	GSMM_057	EX_anhgm_e	GSMM_239	EX_ppal_e	('NTC', 'NTC')	NTC	NTC
5246	EX_4hbz_e	GSMM_161	EX_anhgm_e	GSMM_239	EX_ppal_e	('NTC', 'NTC')	NTC	NTC
5251	EX_4hbz_e	GSMM_220	EX_anhgm_e	GSMM_239	EX_ppal_e	('NTC', 'NTC')	NTC	NTC
5252	EX_4hbz_e	GSMM_225	EX_anhgm_e	GSMM_239	EX_ppal_e	('NTC', 'NTC')	NTC	NTC
5254	EX_4hbz_e	GSMM_256	EX_anhgm_e	GSMM_239	EX_ppal_e	('NTC', 'NTC')	NTC	NTC
5255	EX_4hbz_e	GSMM_261	EX_anhgm_e	GSMM_239	EX_ppal_e	('NTC', 'NTC')	NTC	NTC
5256	EX_4hbz_e	GSMM_262	EX_anhgm_e	GSMM_239	EX_ppal_e	('NTC', 'NTC')	NTC	NTC
5257	EX_4hbz_e	GSMM_265	EX_anhgm_e	GSMM_239	EX_ppal_e	('NTC', 'NTC')	NTC	NTC
5260	EX_4hbz_e	GSMM_280	EX_anhgm_e	GSMM_239	EX_ppal_e	('NTC', 'NTC')	NTC	NTC
5265	EX_4hbz_e	GSMM_365	EX_anhgm_e	GSMM_239	EX_ppal_e	('NTC', 'NTC')	NTC	NTC
5266	EX_4hbz_e	GSMM_374	EX_anhgm_e	GSMM_239	EX_ppal_e	('NTC', 'NTC')	NTC	NTC
5273	EX_4hbz_e	GSMM_024	EX_urea_e	GSMM_239	EX_ppal_e	('NTC', 'NTC')	NTC	NTC
5282	EX_4hbz_e	GSMM_057	EX_urea_e	GSMM_239	EX_ppal_e	('NTC', 'NTC')	NTC	NTC
5285	EX_4hbz_e	GSMM_093	EX_urea_e	GSMM_239	EX_ppal_e	('NTC', 'NTC')	NTC	NTC
5287	EX_4hbz_e	GSMM_104	EX_urea_e	GSMM_239	EX_ppal_e	('NTC', 'NTC')	NTC	NTC
5294	EX_4hbz_e	GSMM_161	EX_urea_e	GSMM_239	EX_ppal_e	('NTC', 'NTC')	NTC	NTC
5299	EX_4hbz_e	GSMM_220	EX_urea_e	GSMM_239	EX_ppal_e	('NTC', 'NTC')	NTC	NTC
5300	EX_4hbz_e	GSMM_232	EX_urea_e	GSMM_239	EX_ppal_e	('NTC', 'NTC')	NTC	NTC
5302	EX_4hbz_e	GSMM_256	EX_urea_e	GSMM_239	EX_ppal_e	('NTC', 'NTC')	NTC	NTC
5303	EX_4hbz_e	GSMM_261	EX_urea_e	GSMM_239	EX_ppal_e	('NTC', 'NTC')	NTC	NTC
5304	EX_4hbz_e	GSMM_262	EX_urea_e	GSMM_239	EX_ppal_e	('NTC', 'NTC')	NTC	NTC
5305	EX_4hbz_e	GSMM_265	EX_urea_e	GSMM_239	EX_ppal_e	('NTC', 'NTC')	NTC	NTC
5308	EX_4hbz_e	GSMM_280	EX_urea_e	GSMM_239	EX_ppal_e	('NTC', 'NTC')	NTC	NTC
5309	EX_4hbz_e	GSMM_306	EX_urea_e	GSMM_239	EX_ppal_e	('NTC', 'NTC')	NTC	NTC
5320	EX_4hbz_e	GSMM_365	EX_urea_e	GSMM_239	EX_ppal_e	('NTC', 'NTC')	NTC	NTC
5321	EX_4hbz_e	GSMM_374	EX_urea_e	GSMM_239	EX_ppal_e	('NTC', 'NTC')	NTC	NTC
5332	EX_4hbz_e	GSMM_104	EX_chol_e	GSMM_239	EX_ppal_e	('NTC', 'NTC')	NTC	NTC
5335	EX_4hbz_e	GSMM_142	EX_chol_e	GSMM_239	EX_ppal_e	('NTC', 'NTC')	NTC	NTC
5341	EX_4hbz_e	GSMM_220	EX_chol_e	GSMM_239	EX_ppal_e	('NTC', 'NTC')	NTC	NTC
5342	EX_4hbz_e	GSMM_225	EX_chol_e	GSMM_239	EX_ppal_e	('NTC', 'NTC')	NTC	NTC
5344	EX_4hbz_e	GSMM_256	EX_chol_e	GSMM_239	EX_ppal_e	('NTC', 'NTC')	NTC	NTC
5345	EX_4hbz_e	GSMM_261	EX_chol_e	GSMM_239	EX_ppal_e	('NTC', 'NTC')	NTC	NTC
5346	EX_4hbz_e	GSMM_262	EX_chol_e	GSMM_239	EX_ppal_e	('NTC', 'NTC')	NTC	NTC
5347	EX_4hbz_e	GSMM_265	EX_chol_e	GSMM_239	EX_ppal_e	('NTC', 'NTC')	NTC	NTC
5349	EX_4hbz_e	GSMM_280	EX_chol_e	GSMM_239	EX_ppal_e	('NTC', 'NTC')	NTC	NTC
5358	EX_4hbz_e	GSMM_365	EX_chol_e	GSMM_239	EX_ppal_e	('NTC', 'NTC')	NTC	NTC
5363	EX_4hbz_e	GSMM_057	EX_glyald_e	GSMM_239	EX_ppal_e	('NTC', 'NTC')	NTC	NTC
5365	EX_4hbz_e	GSMM_093	EX_glyald_e	GSMM_239	EX_ppal_e	('NTC', 'NTC')	NTC	NTC
5372	EX_4hbz_e	GSMM_161	EX_glyald_e	GSMM_239	EX_ppal_e	('NTC', 'NTC')	NTC	NTC
5377	EX_4hbz_e	GSMM_220	EX_glyald_e	GSMM_239	EX_ppal_e	('NTC', 'NTC')	NTC	NTC
5379	EX_4hbz_e	GSMM_256	EX_glyald_e	GSMM_239	EX_ppal_e	('NTC', 'NTC')	NTC	NTC
5380	EX_4hbz_e	GSMM_261	EX_glyald_e	GSMM_239	EX_ppal_e	('NTC', 'NTC')	NTC	NTC
5381	EX_4hbz_e	GSMM_265	EX_glyald_e	GSMM_239	EX_ppal_e	('NTC', 'NTC')	NTC	NTC
5384	EX_4hbz_e	GSMM_306	EX_glyald_e	GSMM_239	EX_ppal_e	('NTC', 'NTC')	NTC	NTC
5389	EX_4hbz_e	GSMM_374	EX_glyald_e	GSMM_239	EX_ppal_e	('NTC', 'NTC')	NTC	NTC
5398	EX_4hbz_e	GSMM_057	EX_ura_e	GSMM_239	EX_ppal_e	('NTC', 'NTC')	NTC	NTC
5400	EX_4hbz_e	GSMM_093	EX_ura_e	GSMM_239	EX_ppal_e	('NTC', 'NTC')	NTC	NTC
5404	EX_4hbz_e	GSMM_161	EX_ura_e	GSMM_239	EX_ppal_e	('NTC', 'NTC')	NTC	NTC
5407	EX_4hbz_e	GSMM_220	EX_ura_e	GSMM_239	EX_ppal_e	('NTC', 'NTC')	NTC	NTC
5409	EX_4hbz_e	GSMM_262	EX_ura_e	GSMM_239	EX_ppal_e	('NTC', 'NTC')	NTC	NTC
5410	EX_4hbz_e	GSMM_265	EX_ura_e	GSMM_239	EX_ppal_e	('NTC', 'NTC')	NTC	NTC
5419	EX_4hbz_e	GSMM_024	EX_gal_e	GSMM_239	EX_ppal_e	('NTC', 'NTC')	NTC	NTC
5425	EX_4hbz_e	GSMM_057	EX_gal_e	GSMM_239	EX_ppal_e	('NTC', 'NTC')	NTC	NTC
5429	EX_4hbz_e	GSMM_104	EX_gal_e	GSMM_239	EX_ppal_e	('NTC', 'NTC')	NTC	NTC
5434	EX_4hbz_e	GSMM_142	EX_gal_e	GSMM_239	EX_ppal_e	('NTC', 'NTC')	NTC	NTC
5439	EX_4hbz_e	GSMM_220	EX_gal_e	GSMM_239	EX_ppal_e	('NTC', 'NTC')	NTC	NTC
5440	EX_4hbz_e	GSMM_225	EX_gal_e	GSMM_239	EX_ppal_e	('NTC', 'NTC')	NTC	NTC
5442	EX_4hbz_e	GSMM_232	EX_gal_e	GSMM_239	EX_ppal_e	('NTC', 'NTC')	NTC	NTC
5444	EX_4hbz_e	GSMM_256	EX_gal_e	GSMM_239	EX_ppal_e	('NTC', 'NTC')	NTC	NTC
5445	EX_4hbz_e	GSMM_262	EX_gal_e	GSMM_239	EX_ppal_e	('NTC', 'NTC')	NTC	NTC
5446	EX_4hbz_e	GSMM_265	EX_gal_e	GSMM_239	EX_ppal_e	('NTC', 'NTC')	NTC	NTC
5456	EX_4hbz_e	GSMM_365	EX_gal_e	GSMM_239	EX_ppal_e	('NTC', 'NTC')	NTC	NTC
5460	EX_4hbz_e	GSMM_024	EX_ala__D_e	GSMM_239	EX_ppal_e	('NTC', 'NTC')	NTC	NTC
5464	EX_4hbz_e	GSMM_057	EX_ala__D_e	GSMM_239	EX_ppal_e	('NTC', 'NTC')	NTC	NTC
5466	EX_4hbz_e	GSMM_104	EX_ala__D_e	GSMM_239	EX_ppal_e	('NTC', 'NTC')	NTC	NTC
5469	EX_4hbz_e	GSMM_142	EX_ala__D_e	GSMM_239	EX_ppal_e	('NTC', 'NTC')	NTC	NTC
5472	EX_4hbz_e	GSMM_161	EX_ala__D_e	GSMM_239	EX_ppal_e	('NTC', 'NTC')	NTC	NTC
5475	EX_4hbz_e	GSMM_220	EX_ala__D_e	GSMM_239	EX_ppal_e	('NTC', 'NTC')	NTC	NTC
5476	EX_4hbz_e	GSMM_225	EX_ala__D_e	GSMM_239	EX_ppal_e	('NTC', 'NTC')	NTC	NTC
5477	EX_4hbz_e	GSMM_232	EX_ala__D_e	GSMM_239	EX_ppal_e	('NTC', 'NTC')	NTC	NTC
5479	EX_4hbz_e	GSMM_256	EX_ala__D_e	GSMM_239	EX_ppal_e	('NTC', 'NTC')	NTC	NTC
5480	EX_4hbz_e	GSMM_261	EX_ala__D_e	GSMM_239	EX_ppal_e	('NTC', 'NTC')	NTC	NTC
5481	EX_4hbz_e	GSMM_262	EX_ala__D_e	GSMM_239	EX_ppal_e	('NTC', 'NTC')	NTC	NTC
5483	EX_4hbz_e	GSMM_280	EX_ala__D_e	GSMM_239	EX_ppal_e	('NTC', 'NTC')	NTC	NTC
5484	EX_4hbz_e	GSMM_306	EX_ala__D_e	GSMM_239	EX_ppal_e	('NTC', 'NTC')	NTC	NTC
5491	EX_4hbz_e	GSMM_374	EX_ala__D_e	GSMM_239	EX_ppal_e	('NTC', 'NTC')	NTC	NTC
5500	EX_4hbz_e	GSMM_104	EX_gua_e	GSMM_239	EX_ppal_e	('NTC', 'NTC')	NTC	NTC
5504	EX_4hbz_e	GSMM_220	EX_gua_e	GSMM_239	EX_ppal_e	('NTC', 'NTC')	NTC	NTC
5505	EX_4hbz_e	GSMM_225	EX_gua_e	GSMM_239	EX_ppal_e	('NTC', 'NTC')	NTC	NTC
5506	EX_4hbz_e	GSMM_232	EX_gua_e	GSMM_239	EX_ppal_e	('NTC', 'NTC')	NTC	NTC
5507	EX_4hbz_e	GSMM_262	EX_gua_e	GSMM_239	EX_ppal_e	('NTC', 'NTC')	NTC	NTC
5508	EX_4hbz_e	GSMM_265	EX_gua_e	GSMM_239	EX_ppal_e	('NTC', 'NTC')	NTC	NTC
5518	EX_4hbz_e	GSMM_024	EX_ind3ac_e	GSMM_239	EX_ppal_e	('NTC', 'NTC')	NTC	NTC
5526	EX_4hbz_e	GSMM_057	EX_ind3ac_e	GSMM_239	EX_ppal_e	('NTC', 'NTC')	NTC	NTC
5531	EX_4hbz_e	GSMM_093	EX_ind3ac_e	GSMM_239	EX_ppal_e	('NTC', 'NTC')	NTC	NTC
5536	EX_4hbz_e	GSMM_142	EX_ind3ac_e	GSMM_239	EX_ppal_e	('NTC', 'NTC')	NTC	NTC
5538	EX_4hbz_e	GSMM_161	EX_ind3ac_e	GSMM_239	EX_ppal_e	('NTC', 'NTC')	NTC	NTC
5543	EX_4hbz_e	GSMM_220	EX_ind3ac_e	GSMM_239	EX_ppal_e	('NTC', 'NTC')	NTC	NTC
5545	EX_4hbz_e	GSMM_232	EX_ind3ac_e	GSMM_239	EX_ppal_e	('NTC', 'NTC')	NTC	NTC
5547	EX_4hbz_e	GSMM_261	EX_ind3ac_e	GSMM_239	EX_ppal_e	('NTC', 'NTC')	NTC	NTC
5548	EX_4hbz_e	GSMM_262	EX_ind3ac_e	GSMM_239	EX_ppal_e	('NTC', 'NTC')	NTC	NTC
5549	EX_4hbz_e	GSMM_265	EX_ind3ac_e	GSMM_239	EX_ppal_e	('NTC', 'NTC')	NTC	NTC
5552	EX_4hbz_e	GSMM_280	EX_ind3ac_e	GSMM_239	EX_ppal_e	('NTC', 'NTC')	NTC	NTC
5553	EX_4hbz_e	GSMM_306	EX_ind3ac_e	GSMM_239	EX_ppal_e	('NTC', 'NTC')	NTC	NTC
5564	EX_4hbz_e	GSMM_365	EX_ind3ac_e	GSMM_239	EX_ppal_e	('NTC', 'NTC')	NTC	NTC
5571	EX_4hbz_e	GSMM_057	EX_etha_e	GSMM_239	EX_ppal_e	('NTC', 'NTC')	NTC	NTC
5573	EX_4hbz_e	GSMM_093	EX_etha_e	GSMM_239	EX_ppal_e	('NTC', 'NTC')	NTC	NTC
5575	EX_4hbz_e	GSMM_104	EX_etha_e	GSMM_239	EX_ppal_e	('NTC', 'NTC')	NTC	NTC
5588	EX_4hbz_e	GSMM_280	EX_etha_e	GSMM_239	EX_ppal_e	('NTC', 'NTC')	NTC	NTC
5594	EX_4hbz_e	GSMM_365	EX_etha_e	GSMM_239	EX_ppal_e	('NTC', 'NTC')	NTC	NTC
5601	EX_4hbz_e	GSMM_024	EX_orn_e	GSMM_239	EX_ppal_e	('NTC', 'NTC')	NTC	NTC
5606	EX_4hbz_e	GSMM_093	EX_orn_e	GSMM_239	EX_ppal_e	('NTC', 'NTC')	NTC	NTC
5607	EX_4hbz_e	GSMM_104	EX_orn_e	GSMM_239	EX_ppal_e	('NTC', 'NTC')	NTC	NTC
5611	EX_4hbz_e	GSMM_142	EX_orn_e	GSMM_239	EX_ppal_e	('NTC', 'NTC')	NTC	NTC
5614	EX_4hbz_e	GSMM_161	EX_orn_e	GSMM_239	EX_ppal_e	('NTC', 'NTC')	NTC	NTC
5619	EX_4hbz_e	GSMM_256	EX_orn_e	GSMM_239	EX_ppal_e	('NTC', 'NTC')	NTC	NTC
5620	EX_4hbz_e	GSMM_261	EX_orn_e	GSMM_239	EX_ppal_e	('NTC', 'NTC')	NTC	NTC
5621	EX_4hbz_e	GSMM_262	EX_orn_e	GSMM_239	EX_ppal_e	('NTC', 'NTC')	NTC	NTC
5623	EX_4hbz_e	GSMM_306	EX_orn_e	GSMM_239	EX_ppal_e	('NTC', 'NTC')	NTC	NTC
5629	EX_4hbz_e	GSMM_365	EX_orn_e	GSMM_239	EX_ppal_e	('NTC', 'NTC')	NTC	NTC
5630	EX_4hbz_e	GSMM_374	EX_orn_e	GSMM_239	EX_ppal_e	('NTC', 'NTC')	NTC	NTC
5640	EX_4hbz_e	GSMM_142	EX_gthrd_e	GSMM_239	EX_ppal_e	('NTC', 'NTC')	NTC	NTC
5644	EX_4hbz_e	GSMM_265	EX_gthrd_e	GSMM_239	EX_ppal_e	('NTC', 'NTC')	NTC	NTC
5646	EX_4hbz_e	GSMM_280	EX_gthrd_e	GSMM_239	EX_ppal_e	('NTC', 'NTC')	NTC	NTC
5647	EX_4hbz_e	GSMM_306	EX_gthrd_e	GSMM_239	EX_ppal_e	('NTC', 'NTC')	NTC	NTC
5649	EX_4hbz_e	GSMM_365	EX_gthrd_e	GSMM_239	EX_ppal_e	('NTC', 'NTC')	NTC	NTC
5658	EX_4hbz_e	GSMM_142	EX_pea_e	GSMM_239	EX_ppal_e	('NTC', 'NTC')	NTC	NTC
5660	EX_4hbz_e	GSMM_225	EX_pea_e	GSMM_239	EX_ppal_e	('NTC', 'NTC')	NTC	NTC
5661	EX_4hbz_e	GSMM_265	EX_pea_e	GSMM_239	EX_ppal_e	('NTC', 'NTC')	NTC	NTC
5664	EX_4hbz_e	GSMM_374	EX_pea_e	GSMM_239	EX_ppal_e	('NTC', 'NTC')	NTC	NTC
5676	EX_4hbz_e	GSMM_232	EX_glu__L_e	GSMM_239	EX_ppal_e	('NTC', 'NTC')	NTC	NTC
5677	EX_4hbz_e	GSMM_256	EX_glu__L_e	GSMM_239	EX_ppal_e	('NTC', 'NTC')	NTC	NTC
5678	EX_4hbz_e	GSMM_262	EX_glu__L_e	GSMM_239	EX_ppal_e	('NTC', 'NTC')	NTC	NTC
5679	EX_4hbz_e	GSMM_265	EX_glu__L_e	GSMM_239	EX_ppal_e	('NTC', 'NTC')	NTC	NTC
5680	EX_4hbz_e	GSMM_280	EX_glu__L_e	GSMM_239	EX_ppal_e	('NTC', 'NTC')	NTC	NTC
5681	EX_4hbz_e	GSMM_306	EX_glu__L_e	GSMM_239	EX_ppal_e	('NTC', 'NTC')	NTC	NTC
5684	EX_4hbz_e	GSMM_365	EX_glu__L_e	GSMM_239	EX_ppal_e	('NTC', 'NTC')	NTC	NTC
5685	EX_4hbz_e	GSMM_374	EX_glu__L_e	GSMM_239	EX_ppal_e	('NTC', 'NTC')	NTC	NTC
5701	EX_4hbz_e	GSMM_232	EX_cgly_e	GSMM_239	EX_ppal_e	('NTC', 'NTC')	NTC	NTC
5702	EX_4hbz_e	GSMM_256	EX_cgly_e	GSMM_239	EX_ppal_e	('NTC', 'NTC')	NTC	NTC
5703	EX_4hbz_e	GSMM_265	EX_cgly_e	GSMM_239	EX_ppal_e	('NTC', 'NTC')	NTC	NTC
5705	EX_4hbz_e	GSMM_280	EX_cgly_e	GSMM_239	EX_ppal_e	('NTC', 'NTC')	NTC	NTC
5706	EX_4hbz_e	GSMM_306	EX_cgly_e	GSMM_239	EX_ppal_e	('NTC', 'NTC')	NTC	NTC
5710	EX_4hbz_e	GSMM_365	EX_cgly_e	GSMM_239	EX_ppal_e	('NTC', 'NTC')	NTC	NTC
5711	EX_4hbz_e	GSMM_374	EX_cgly_e	GSMM_239	EX_ppal_e	('NTC', 'NTC')	NTC	NTC
5717	EX_4hbz_e	GSMM_057	EX_glc__D_e	GSMM_239	EX_ppal_e	('NTC', 'NTC')	NTC	NTC
5721	EX_4hbz_e	GSMM_142	EX_glc__D_e	GSMM_239	EX_ppal_e	('NTC', 'NTC')	NTC	NTC
5728	EX_4hbz_e	GSMM_225	EX_glc__D_e	GSMM_239	EX_ppal_e	('NTC', 'NTC')	NTC	NTC
5731	EX_4hbz_e	GSMM_262	EX_glc__D_e	GSMM_239	EX_ppal_e	('NTC', 'NTC')	NTC	NTC
5732	EX_4hbz_e	GSMM_265	EX_glc__D_e	GSMM_239	EX_ppal_e	('NTC', 'NTC')	NTC	NTC
5734	EX_4hbz_e	GSMM_306	EX_glc__D_e	GSMM_239	EX_ppal_e	('NTC', 'NTC')	NTC	NTC
5743	EX_4hbz_e	GSMM_365	EX_glc__D_e	GSMM_239	EX_ppal_e	('NTC', 'NTC')	NTC	NTC
5744	EX_4hbz_e	GSMM_374	EX_glc__D_e	GSMM_239	EX_ppal_e	('NTC', 'NTC')	NTC	NTC
5747	EX_4hbz_e	GSMM_024	EX_cys__L_e	GSMM_239	EX_ppal_e	('NTC', 'NTC')	NTC	NTC
5749	EX_4hbz_e	GSMM_057	EX_cys__L_e	GSMM_239	EX_ppal_e	('NTC', 'NTC')	NTC	NTC
5758	EX_4hbz_e	GSMM_220	EX_cys__L_e	GSMM_239	EX_ppal_e	('NTC', 'NTC')	NTC	NTC
5759	EX_4hbz_e	GSMM_256	EX_cys__L_e	GSMM_239	EX_ppal_e	('NTC', 'NTC')	NTC	NTC
5761	EX_4hbz_e	GSMM_306	EX_cys__L_e	GSMM_239	EX_ppal_e	('NTC', 'NTC')	NTC	NTC
5769	EX_4hbz_e	GSMM_374	EX_cys__L_e	GSMM_239	EX_ppal_e	('NTC', 'NTC')	NTC	NTC
5773	EX_4hbz_e	GSMM_024	EX_pheme_e	GSMM_239	EX_ppal_e	('NTC', 'NTC')	NTC	NTC
5775	EX_4hbz_e	GSMM_057	EX_pheme_e	GSMM_239	EX_ppal_e	('NTC', 'NTC')	NTC	NTC
5780	EX_4hbz_e	GSMM_093	EX_pheme_e	GSMM_239	EX_ppal_e	('NTC', 'NTC')	NTC	NTC
5784	EX_4hbz_e	GSMM_142	EX_pheme_e	GSMM_239	EX_ppal_e	('NTC', 'NTC')	NTC	NTC
5790	EX_4hbz_e	GSMM_232	EX_pheme_e	GSMM_239	EX_ppal_e	('NTC', 'NTC')	NTC	NTC
5791	EX_4hbz_e	GSMM_265	EX_pheme_e	GSMM_239	EX_ppal_e	('NTC', 'NTC')	NTC	NTC
5802	EX_4hbz_e	GSMM_024	EX_g3pe_e	GSMM_239	EX_ppal_e	('NTC', 'NTC')	NTC	NTC
5807	EX_4hbz_e	GSMM_093	EX_g3pe_e	GSMM_239	EX_ppal_e	('NTC', 'NTC')	NTC	NTC
5809	EX_4hbz_e	GSMM_161	EX_g3pe_e	GSMM_239	EX_ppal_e	('NTC', 'NTC')	NTC	NTC
5816	EX_4hbz_e	GSMM_365	EX_g3pe_e	GSMM_239	EX_ppal_e	('NTC', 'NTC')	NTC	NTC
5826	EX_4hbz_e	GSMM_142	EX_glcn_e	GSMM_239	EX_ppal_e	('NTC', 'NTC')	NTC	NTC
5829	EX_4hbz_e	GSMM_161	EX_glcn_e	GSMM_239	EX_ppal_e	('NTC', 'NTC')	NTC	NTC
5832	EX_4hbz_e	GSMM_306	EX_glcn_e	GSMM_239	EX_ppal_e	('NTC', 'NTC')	NTC	NTC
5838	EX_4hbz_e	GSMM_104	EX_acac_e	GSMM_239	EX_ppal_e	('NTC', 'NTC')	NTC	NTC
5844	EX_4hbz_e	GSMM_365	EX_acac_e	GSMM_239	EX_ppal_e	('NTC', 'NTC')	NTC	NTC
5850	EX_4hbz_e	GSMM_057	EX_4abut_e	GSMM_239	EX_ppal_e	('NTC', 'NTC')	NTC	NTC
5857	EX_4hbz_e	GSMM_261	EX_4abut_e	GSMM_239	EX_ppal_e	('NTC', 'NTC')	NTC	NTC
5859	EX_4hbz_e	GSMM_306	EX_4abut_e	GSMM_239	EX_ppal_e	('NTC', 'NTC')	NTC	NTC
5862	EX_4hbz_e	GSMM_024	EX_lys__L_e	GSMM_239	EX_ppal_e	('NTC', 'NTC')	NTC	NTC
5867	EX_4hbz_e	GSMM_104	EX_lys__L_e	GSMM_239	EX_ppal_e	('NTC', 'NTC')	NTC	NTC
5870	EX_4hbz_e	GSMM_142	EX_lys__L_e	GSMM_239	EX_ppal_e	('NTC', 'NTC')	NTC	NTC
5873	EX_4hbz_e	GSMM_232	EX_lys__L_e	GSMM_239	EX_ppal_e	('NTC', 'NTC')	NTC	NTC
5874	EX_4hbz_e	GSMM_262	EX_lys__L_e	GSMM_239	EX_ppal_e	('NTC', 'NTC')	NTC	NTC
5877	EX_4hbz_e	GSMM_256	EX_agm_e	GSMM_239	EX_ppal_e	('NTC', 'NTC')	NTC	NTC
5879	EX_4hbz_e	GSMM_265	EX_4abz_e	GSMM_239	EX_ppal_e	('NTC', 'NTC')	NTC	NTC
5896	EX_4hbz_e	GSMM_024	EX_5dglcn_e	GSMM_239	EX_ppal_e	('NTC', 'NTC')	NTC	NTC
5898	EX_4hbz_e	GSMM_104	EX_5dglcn_e	GSMM_239	EX_ppal_e	('NTC', 'NTC')	NTC	NTC
5900	EX_4hbz_e	GSMM_225	EX_5dglcn_e	GSMM_239	EX_ppal_e	('NTC', 'NTC')	NTC	NTC
5902	EX_4hbz_e	GSMM_232	EX_5dglcn_e	GSMM_239	EX_ppal_e	('NTC', 'NTC')	NTC	NTC
5903	EX_4hbz_e	GSMM_261	EX_5dglcn_e	GSMM_239	EX_ppal_e	('NTC', 'NTC')	NTC	NTC
5904	EX_4hbz_e	GSMM_265	EX_5dglcn_e	GSMM_239	EX_ppal_e	('NTC', 'NTC')	NTC	NTC
5907	EX_4hbz_e	GSMM_365	EX_5dglcn_e	GSMM_239	EX_ppal_e	('NTC', 'NTC')	NTC	NTC
5909	EX_4hbz_e	GSMM_024	EX_g3pg_e	GSMM_239	EX_ppal_e	('NTC', 'NTC')	NTC	NTC
5911	EX_4hbz_e	GSMM_024	EX_glcur_e	GSMM_239	EX_ppal_e	('NTC', 'NTC')	NTC	NTC
5912	EX_4hbz_e	GSMM_024	EX_arg__L_e	GSMM_239	EX_ppal_e	('NTC', 'NTC')	NTC	NTC
5914	EX_4hbz_e	GSMM_104	EX_arg__L_e	GSMM_239	EX_ppal_e	('NTC', 'NTC')	NTC	NTC
5917	EX_4hbz_e	GSMM_142	EX_arg__L_e	GSMM_239	EX_ppal_e	('NTC', 'NTC')	NTC	NTC
5924	EX_4hbz_e	GSMM_057	EX_udcpp_e	GSMM_239	EX_ppal_e	('NTC', 'NTC')	NTC	NTC
5926	EX_4hbz_e	GSMM_161	EX_udcpp_e	GSMM_239	EX_ppal_e	('NTC', 'NTC')	NTC	NTC
5928	EX_4hbz_e	GSMM_220	EX_udcpp_e	GSMM_239	EX_ppal_e	('NTC', 'NTC')	NTC	NTC
5929	EX_4hbz_e	GSMM_261	EX_udcpp_e	GSMM_239	EX_ppal_e	('NTC', 'NTC')	NTC	NTC
5936	EX_4hbz_e	GSMM_057	EX_leu__L_e	GSMM_239	EX_ppal_e	('NTC', 'NTC')	NTC	NTC
5937	EX_4hbz_e	GSMM_225	EX_leu__L_e	GSMM_239	EX_ppal_e	('NTC', 'NTC')	NTC	NTC
5945	EX_4hbz_e	GSMM_232	EX_cresol_e	GSMM_239	EX_ppal_e	('NTC', 'NTC')	NTC	NTC
5947	EX_4hbz_e	GSMM_365	EX_cresol_e	GSMM_239	EX_ppal_e	('NTC', 'NTC')	NTC	NTC
5952	EX_4hbz_e	GSMM_232	EX_glyb_e	GSMM_239	EX_ppal_e	('NTC', 'NTC')	NTC	NTC
5953	EX_4hbz_e	GSMM_265	EX_glyb_e	GSMM_239	EX_ppal_e	('NTC', 'NTC')	NTC	NTC
5959	EX_4hbz_e	GSMM_225	EX_acglu_e	GSMM_239	EX_ppal_e	('NTC', 'NTC')	NTC	NTC
5967	EX_4hbz_e	GSMM_104	EX_hxan_e	GSMM_239	EX_ppal_e	('NTC', 'NTC')	NTC	NTC
5968	EX_4hbz_e	GSMM_142	EX_hxan_e	GSMM_239	EX_ppal_e	('NTC', 'NTC')	NTC	NTC
5971	EX_4hbz_e	GSMM_225	EX_hxan_e	GSMM_239	EX_ppal_e	('NTC', 'NTC')	NTC	NTC
5972	EX_4hbz_e	GSMM_232	EX_hxan_e	GSMM_239	EX_ppal_e	('NTC', 'NTC')	NTC	NTC
5980	EX_4hbz_e	GSMM_265	EX_2hxmp_e	GSMM_239	EX_ppal_e	('NTC', 'NTC')	NTC	NTC
5981	EX_4hbz_e	GSMM_374	EX_2hxmp_e	GSMM_239	EX_ppal_e	('NTC', 'NTC')	NTC	NTC
5983	EX_4hbz_e	GSMM_265	EX_lcts_e	GSMM_239	EX_ppal_e	('NTC', 'NTC')	NTC	NTC
5984	EX_4hbz_e	GSMM_220	EX_salchs4_e	GSMM_239	EX_ppal_e	('NTC', 'NTC')	NTC	NTC
5992	EX_ala_B_e	GSMM_232	EX_5drib_e	GSMM_024	EX_g3pg_e	('NTC', 'NTC')	NTC	NTC
5993	EX_ala_B_e	GSMM_239	EX_5drib_e	GSMM_024	EX_g3pg_e	('NTC', 'NTC')	NTC	NTC
5995	EX_ala_B_e	GSMM_306	EX_5drib_e	GSMM_024	EX_g3pg_e	('NTC', 'NTC')	NTC	NTC
6002	EX_ala_B_e	GSMM_306	EX_gthrd_e	GSMM_024	EX_g3pg_e	('NTC', 'NTC')	NTC	NTC
6006	EX_ala_B_e	GSMM_232	EX_etoh_e	GSMM_024	EX_g3pg_e	('NTC', 'NTC')	NTC	NTC
6007	EX_ala_B_e	GSMM_239	EX_etoh_e	GSMM_024	EX_g3pg_e	('NTC', 'NTC')	NTC	NTC
6016	EX_ala_B_e	GSMM_306	EX_ch4s_e	GSMM_024	EX_g3pg_e	('NTC', 'NTC')	NTC	NTC
6022	EX_ala_B_e	GSMM_232	EX_fald_e	GSMM_024	EX_g3pg_e	('NTC', 'NTC')	NTC	NTC
6024	EX_ala_B_e	GSMM_306	EX_fald_e	GSMM_024	EX_g3pg_e	('NTC', 'NTC')	NTC	NTC
6030	EX_ala_B_e	GSMM_232	EX_rib__D_e	GSMM_024	EX_g3pg_e	('NTC', 'NTC')	NTC	NTC
6031	EX_ala_B_e	GSMM_239	EX_rib__D_e	GSMM_024	EX_g3pg_e	('NTC', 'NTC')	NTC	NTC
6032	EX_ala_B_e	GSMM_306	EX_rib__D_e	GSMM_024	EX_g3pg_e	('NTC', 'NTC')	NTC	NTC
6039	EX_ala_B_e	GSMM_306	EX_4hbz_e	GSMM_024	EX_g3pg_e	('NTC', 'NTC')	NTC	NTC
6051	EX_ala_B_e	GSMM_232	EX_spmd_e	GSMM_024	EX_g3pg_e	('NTC', 'NTC')	NTC	NTC
6052	EX_ala_B_e	GSMM_239	EX_spmd_e	GSMM_024	EX_g3pg_e	('NTC', 'NTC')	NTC	NTC
6056	EX_ala_B_e	GSMM_232	EX_glu__L_e	GSMM_024	EX_g3pg_e	('NTC', 'NTC')	NTC	NTC
6057	EX_ala_B_e	GSMM_306	EX_glu__L_e	GSMM_024	EX_g3pg_e	('NTC', 'NTC')	NTC	NTC
6060	EX_ala_B_e	GSMM_232	EX_4hbald_e	GSMM_024	EX_g3pg_e	('NTC', 'NTC')	NTC	NTC
6066	EX_ala_B_e	GSMM_232	EX_cgly_e	GSMM_024	EX_g3pg_e	('NTC', 'NTC')	NTC	NTC
6068	EX_ala_B_e	GSMM_306	EX_cgly_e	GSMM_024	EX_g3pg_e	('NTC', 'NTC')	NTC	NTC
6073	EX_ala_B_e	GSMM_232	EX_glyc_e	GSMM_024	EX_g3pg_e	('NTC', 'NTC')	NTC	NTC
6074	EX_ala_B_e	GSMM_239	EX_glyc_e	GSMM_024	EX_g3pg_e	('NTC', 'NTC')	NTC	NTC
6082	EX_ala_B_e	GSMM_232	EX_fe3pyovd_kt_e	GSMM_024	EX_g3pg_e	('NTC', 'NTC')	NTC	NTC
6083	EX_ala_B_e	GSMM_239	EX_fe3pyovd_kt_e	GSMM_024	EX_g3pg_e	('NTC', 'NTC')	NTC	NTC
6085	EX_ala_B_e	GSMM_306	EX_fe3pyovd_kt_e	GSMM_024	EX_g3pg_e	('NTC', 'NTC')	NTC	NTC
6092	EX_ala_B_e	GSMM_232	EX_pyovd_kt_e	GSMM_024	EX_g3pg_e	('NTC', 'NTC')	NTC	NTC
6093	EX_ala_B_e	GSMM_239	EX_pyovd_kt_e	GSMM_024	EX_g3pg_e	('NTC', 'NTC')	NTC	NTC
6095	EX_ala_B_e	GSMM_306	EX_pyovd_kt_e	GSMM_024	EX_g3pg_e	('NTC', 'NTC')	NTC	NTC
6100	EX_ala_B_e	GSMM_239	EX_ser__L_e	GSMM_024	EX_g3pg_e	('NTC', 'NTC')	NTC	NTC
6106	EX_ala_B_e	GSMM_232	EX_ind3ac_e	GSMM_024	EX_g3pg_e	('NTC', 'NTC')	NTC	NTC
6107	EX_ala_B_e	GSMM_239	EX_ind3ac_e	GSMM_024	EX_g3pg_e	('NTC', 'NTC')	NTC	NTC
6109	EX_ala_B_e	GSMM_306	EX_ind3ac_e	GSMM_024	EX_g3pg_e	('NTC', 'NTC')	NTC	NTC
6114	EX_ala_B_e	GSMM_232	EX_urea_e	GSMM_024	EX_g3pg_e	('NTC', 'NTC')	NTC	NTC
6115	EX_ala_B_e	GSMM_239	EX_urea_e	GSMM_024	EX_g3pg_e	('NTC', 'NTC')	NTC	NTC
6117	EX_ala_B_e	GSMM_306	EX_urea_e	GSMM_024	EX_g3pg_e	('NTC', 'NTC')	NTC	NTC
6122	EX_ala_B_e	GSMM_239	EX_glc__D_e	GSMM_024	EX_g3pg_e	('NTC', 'NTC')	NTC	NTC
6123	EX_ala_B_e	GSMM_306	EX_glc__D_e	GSMM_024	EX_g3pg_e	('NTC', 'NTC')	NTC	NTC
6130	EX_ala_B_e	GSMM_239	EX_chol_e	GSMM_024	EX_g3pg_e	('NTC', 'NTC')	NTC	NTC
6137	EX_ala_B_e	GSMM_306	EX_cys__L_e	GSMM_024	EX_g3pg_e	('NTC', 'NTC')	NTC	NTC
6142	EX_ala_B_e	GSMM_306	EX_orn_e	GSMM_024	EX_g3pg_e	('NTC', 'NTC')	NTC	NTC
6148	EX_ala_B_e	GSMM_232	EX_pheme_e	GSMM_024	EX_g3pg_e	('NTC', 'NTC')	NTC	NTC
6149	EX_ala_B_e	GSMM_239	EX_pheme_e	GSMM_024	EX_g3pg_e	('NTC', 'NTC')	NTC	NTC
6154	EX_ala_B_e	GSMM_232	EX_acald_e	GSMM_024	EX_g3pg_e	('NTC', 'NTC')	NTC	NTC
6156	EX_ala_B_e	GSMM_306	EX_acald_e	GSMM_024	EX_g3pg_e	('NTC', 'NTC')	NTC	NTC
6160	EX_ala_B_e	GSMM_239	EX_succ_e	GSMM_024	EX_g3pg_e	('NTC', 'NTC')	NTC	NTC
6168	EX_ala_B_e	GSMM_232	EX_gal_e	GSMM_024	EX_g3pg_e	('NTC', 'NTC')	NTC	NTC
6169	EX_ala_B_e	GSMM_239	EX_gal_e	GSMM_024	EX_g3pg_e	('NTC', 'NTC')	NTC	NTC
6174	EX_ala_B_e	GSMM_232	EX_ala__D_e	GSMM_024	EX_g3pg_e	('NTC', 'NTC')	NTC	NTC
6175	EX_ala_B_e	GSMM_239	EX_ala__D_e	GSMM_024	EX_g3pg_e	('NTC', 'NTC')	NTC	NTC
6177	EX_ala_B_e	GSMM_306	EX_ala__D_e	GSMM_024	EX_g3pg_e	('NTC', 'NTC')	NTC	NTC
6181	EX_ala_B_e	GSMM_232	EX_glyb_e	GSMM_024	EX_g3pg_e	('NTC', 'NTC')	NTC	NTC
6187	EX_ala_B_e	GSMM_232	EX_for_e	GSMM_024	EX_g3pg_e	('NTC', 'NTC')	NTC	NTC
6193	EX_ala_B_e	GSMM_232	EX_lys__L_e	GSMM_024	EX_g3pg_e	('NTC', 'NTC')	NTC	NTC
6196	EX_ala_B_e	GSMM_306	EX_ptrc_e	GSMM_024	EX_g3pg_e	('NTC', 'NTC')	NTC	NTC
6199	EX_ala_B_e	GSMM_232	EX_gua_e	GSMM_024	EX_g3pg_e	('NTC', 'NTC')	NTC	NTC
6204	EX_ala_B_e	GSMM_232	EX_oxa_e	GSMM_024	EX_g3pg_e	('NTC', 'NTC')	NTC	NTC
6205	EX_ala_B_e	GSMM_239	EX_oxa_e	GSMM_024	EX_g3pg_e	('NTC', 'NTC')	NTC	NTC
6206	EX_ala_B_e	GSMM_306	EX_oxa_e	GSMM_024	EX_g3pg_e	('NTC', 'NTC')	NTC	NTC
6212	EX_ala_B_e	GSMM_232	EX_indole_e	GSMM_024	EX_g3pg_e	('NTC', 'NTC')	NTC	NTC
6215	EX_ala_B_e	GSMM_232	EX_meoh_e	GSMM_024	EX_g3pg_e	('NTC', 'NTC')	NTC	NTC
6216	EX_ala_B_e	GSMM_306	EX_meoh_e	GSMM_024	EX_g3pg_e	('NTC', 'NTC')	NTC	NTC
6221	EX_ala_B_e	GSMM_232	EX_5dglcn_e	GSMM_024	EX_g3pg_e	('NTC', 'NTC')	NTC	NTC
6223	EX_ala_B_e	GSMM_232	EX_enter_e	GSMM_024	EX_g3pg_e	('NTC', 'NTC')	NTC	NTC
6224	EX_ala_B_e	GSMM_232	EX_R_3hpt_e	GSMM_024	EX_g3pg_e	('NTC', 'NTC')	NTC	NTC
6225	EX_ala_B_e	GSMM_306	EX_R_3hpt_e	GSMM_024	EX_g3pg_e	('NTC', 'NTC')	NTC	NTC
6226	EX_ala_B_e	GSMM_232	EX_glcr_e	GSMM_024	EX_g3pg_e	('NTC', 'NTC')	NTC	NTC
6228	EX_ala_B_e	GSMM_232	EX_hxan_e	GSMM_024	EX_g3pg_e	('NTC', 'NTC')	NTC	NTC
6229	EX_ala_B_e	GSMM_239	EX_anhgm_e	GSMM_024	EX_g3pg_e	('NTC', 'NTC')	NTC	NTC
6235	EX_ala_B_e	GSMM_306	EX_4abut_e	GSMM_024	EX_g3pg_e	('NTC', 'NTC')	NTC	NTC
6245	EX_ala_B_e	GSMM_232	EX_5drib_e	GSMM_208	EX_g3pg_e	('NTC', 'BjSA')	NTC	BjSA
6246	EX_ala_B_e	GSMM_239	EX_5drib_e	GSMM_208	EX_g3pg_e	('NTC', 'BjSA')	NTC	BjSA
6248	EX_ala_B_e	GSMM_306	EX_5drib_e	GSMM_208	EX_g3pg_e	('NTC', 'BjSA')	NTC	BjSA
6255	EX_ala_B_e	GSMM_306	EX_gthrd_e	GSMM_208	EX_g3pg_e	('NTC', 'BjSA')	NTC	BjSA
6259	EX_ala_B_e	GSMM_232	EX_etoh_e	GSMM_208	EX_g3pg_e	('NTC', 'BjSA')	NTC	BjSA
6260	EX_ala_B_e	GSMM_239	EX_etoh_e	GSMM_208	EX_g3pg_e	('NTC', 'BjSA')	NTC	BjSA
6266	EX_ala_B_e	GSMM_239	EX_glyc3p_e	GSMM_208	EX_g3pg_e	('NTC', 'BjSA')	NTC	BjSA
6269	EX_ala_B_e	GSMM_232	EX_5mdru1p_e	GSMM_208	EX_g3pg_e	('NTC', 'BjSA')	NTC	BjSA
6270	EX_ala_B_e	GSMM_239	EX_5mdru1p_e	GSMM_208	EX_g3pg_e	('NTC', 'BjSA')	NTC	BjSA
6276	EX_ala_B_e	GSMM_232	EX_fald_e	GSMM_208	EX_g3pg_e	('NTC', 'BjSA')	NTC	BjSA
6278	EX_ala_B_e	GSMM_306	EX_fald_e	GSMM_208	EX_g3pg_e	('NTC', 'BjSA')	NTC	BjSA
6284	EX_ala_B_e	GSMM_232	EX_rib__D_e	GSMM_208	EX_g3pg_e	('NTC', 'BjSA')	NTC	BjSA
6285	EX_ala_B_e	GSMM_239	EX_rib__D_e	GSMM_208	EX_g3pg_e	('NTC', 'BjSA')	NTC	BjSA
6286	EX_ala_B_e	GSMM_306	EX_rib__D_e	GSMM_208	EX_g3pg_e	('NTC', 'BjSA')	NTC	BjSA
6293	EX_ala_B_e	GSMM_306	EX_4hbz_e	GSMM_208	EX_g3pg_e	('NTC', 'BjSA')	NTC	BjSA
6303	EX_ala_B_e	GSMM_232	EX_spmd_e	GSMM_208	EX_g3pg_e	('NTC', 'BjSA')	NTC	BjSA
6304	EX_ala_B_e	GSMM_239	EX_spmd_e	GSMM_208	EX_g3pg_e	('NTC', 'BjSA')	NTC	BjSA
6308	EX_ala_B_e	GSMM_232	EX_glu__L_e	GSMM_208	EX_g3pg_e	('NTC', 'BjSA')	NTC	BjSA
6309	EX_ala_B_e	GSMM_306	EX_glu__L_e	GSMM_208	EX_g3pg_e	('NTC', 'BjSA')	NTC	BjSA
6312	EX_ala_B_e	GSMM_232	EX_4hbald_e	GSMM_208	EX_g3pg_e	('NTC', 'BjSA')	NTC	BjSA
6318	EX_ala_B_e	GSMM_232	EX_cgly_e	GSMM_208	EX_g3pg_e	('NTC', 'BjSA')	NTC	BjSA
6320	EX_ala_B_e	GSMM_306	EX_cgly_e	GSMM_208	EX_g3pg_e	('NTC', 'BjSA')	NTC	BjSA
6325	EX_ala_B_e	GSMM_232	EX_glyc_e	GSMM_208	EX_g3pg_e	('NTC', 'BjSA')	NTC	BjSA
6326	EX_ala_B_e	GSMM_239	EX_glyc_e	GSMM_208	EX_g3pg_e	('NTC', 'BjSA')	NTC	BjSA
6334	EX_ala_B_e	GSMM_232	EX_fe3pyovd_kt_e	GSMM_208	EX_g3pg_e	('NTC', 'BjSA')	NTC	BjSA
6335	EX_ala_B_e	GSMM_239	EX_fe3pyovd_kt_e	GSMM_208	EX_g3pg_e	('NTC', 'BjSA')	NTC	BjSA
6337	EX_ala_B_e	GSMM_306	EX_fe3pyovd_kt_e	GSMM_208	EX_g3pg_e	('NTC', 'BjSA')	NTC	BjSA
6344	EX_ala_B_e	GSMM_232	EX_pyovd_kt_e	GSMM_208	EX_g3pg_e	('NTC', 'BjSA')	NTC	BjSA
6345	EX_ala_B_e	GSMM_239	EX_pyovd_kt_e	GSMM_208	EX_g3pg_e	('NTC', 'BjSA')	NTC	BjSA
6347	EX_ala_B_e	GSMM_306	EX_pyovd_kt_e	GSMM_208	EX_g3pg_e	('NTC', 'BjSA')	NTC	BjSA
6352	EX_ala_B_e	GSMM_239	EX_ser__L_e	GSMM_208	EX_g3pg_e	('NTC', 'BjSA')	NTC	BjSA
6358	EX_ala_B_e	GSMM_232	EX_ind3ac_e	GSMM_208	EX_g3pg_e	('NTC', 'BjSA')	NTC	BjSA
6359	EX_ala_B_e	GSMM_239	EX_ind3ac_e	GSMM_208	EX_g3pg_e	('NTC', 'BjSA')	NTC	BjSA
6361	EX_ala_B_e	GSMM_306	EX_ind3ac_e	GSMM_208	EX_g3pg_e	('NTC', 'BjSA')	NTC	BjSA
6366	EX_ala_B_e	GSMM_232	EX_urea_e	GSMM_208	EX_g3pg_e	('NTC', 'BjSA')	NTC	BjSA
6367	EX_ala_B_e	GSMM_239	EX_urea_e	GSMM_208	EX_g3pg_e	('NTC', 'BjSA')	NTC	BjSA
6369	EX_ala_B_e	GSMM_306	EX_urea_e	GSMM_208	EX_g3pg_e	('NTC', 'BjSA')	NTC	BjSA
6374	EX_ala_B_e	GSMM_239	EX_glc__D_e	GSMM_208	EX_g3pg_e	('NTC', 'BjSA')	NTC	BjSA
6375	EX_ala_B_e	GSMM_306	EX_glc__D_e	GSMM_208	EX_g3pg_e	('NTC', 'BjSA')	NTC	BjSA
6383	EX_ala_B_e	GSMM_239	EX_chol_e	GSMM_208	EX_g3pg_e	('NTC', 'BjSA')	NTC	BjSA
6390	EX_ala_B_e	GSMM_306	EX_cys__L_e	GSMM_208	EX_g3pg_e	('NTC', 'BjSA')	NTC	BjSA
6395	EX_ala_B_e	GSMM_306	EX_orn_e	GSMM_208	EX_g3pg_e	('NTC', 'BjSA')	NTC	BjSA
6401	EX_ala_B_e	GSMM_232	EX_pheme_e	GSMM_208	EX_g3pg_e	('NTC', 'BjSA')	NTC	BjSA
6402	EX_ala_B_e	GSMM_239	EX_pheme_e	GSMM_208	EX_g3pg_e	('NTC', 'BjSA')	NTC	BjSA
6407	EX_ala_B_e	GSMM_232	EX_acald_e	GSMM_208	EX_g3pg_e	('NTC', 'BjSA')	NTC	BjSA
6409	EX_ala_B_e	GSMM_306	EX_acald_e	GSMM_208	EX_g3pg_e	('NTC', 'BjSA')	NTC	BjSA
6415	EX_ala_B_e	GSMM_239	EX_succ_e	GSMM_208	EX_g3pg_e	('NTC', 'BjSA')	NTC	BjSA
6423	EX_ala_B_e	GSMM_232	EX_gal_e	GSMM_208	EX_g3pg_e	('NTC', 'BjSA')	NTC	BjSA
6424	EX_ala_B_e	GSMM_239	EX_gal_e	GSMM_208	EX_g3pg_e	('NTC', 'BjSA')	NTC	BjSA
6429	EX_ala_B_e	GSMM_232	EX_glyb_e	GSMM_208	EX_g3pg_e	('NTC', 'BjSA')	NTC	BjSA
6438	EX_ala_B_e	GSMM_239	EX_glcn_e	GSMM_208	EX_g3pg_e	('NTC', 'BjSA')	NTC	BjSA
6439	EX_ala_B_e	GSMM_306	EX_glcn_e	GSMM_208	EX_g3pg_e	('NTC', 'BjSA')	NTC	BjSA
6441	EX_ala_B_e	GSMM_232	EX_for_e	GSMM_208	EX_g3pg_e	('NTC', 'BjSA')	NTC	BjSA
6447	EX_ala_B_e	GSMM_232	EX_lys__L_e	GSMM_208	EX_g3pg_e	('NTC', 'BjSA')	NTC	BjSA
6450	EX_ala_B_e	GSMM_306	EX_ptrc_e	GSMM_208	EX_g3pg_e	('NTC', 'BjSA')	NTC	BjSA
6453	EX_ala_B_e	GSMM_232	EX_gua_e	GSMM_208	EX_g3pg_e	('NTC', 'BjSA')	NTC	BjSA
6458	EX_ala_B_e	GSMM_232	EX_oxa_e	GSMM_208	EX_g3pg_e	('NTC', 'BjSA')	NTC	BjSA
6459	EX_ala_B_e	GSMM_239	EX_oxa_e	GSMM_208	EX_g3pg_e	('NTC', 'BjSA')	NTC	BjSA
6460	EX_ala_B_e	GSMM_306	EX_oxa_e	GSMM_208	EX_g3pg_e	('NTC', 'BjSA')	NTC	BjSA
6466	EX_ala_B_e	GSMM_232	EX_indole_e	GSMM_208	EX_g3pg_e	('NTC', 'BjSA')	NTC	BjSA
6469	EX_ala_B_e	GSMM_232	EX_meoh_e	GSMM_208	EX_g3pg_e	('NTC', 'BjSA')	NTC	BjSA
6470	EX_ala_B_e	GSMM_306	EX_meoh_e	GSMM_208	EX_g3pg_e	('NTC', 'BjSA')	NTC	BjSA
6475	EX_ala_B_e	GSMM_232	EX_enter_e	GSMM_208	EX_g3pg_e	('NTC', 'BjSA')	NTC	BjSA
6476	EX_ala_B_e	GSMM_232	EX_glcr_e	GSMM_208	EX_g3pg_e	('NTC', 'BjSA')	NTC	BjSA
6478	EX_ala_B_e	GSMM_232	EX_hxan_e	GSMM_208	EX_g3pg_e	('NTC', 'BjSA')	NTC	BjSA
6479	EX_ala_B_e	GSMM_239	EX_acac_e	GSMM_208	EX_g3pg_e	('NTC', 'BjSA')	NTC	BjSA
6480	EX_ala_B_e	GSMM_239	EX_anhgm_e	GSMM_208	EX_g3pg_e	('NTC', 'BjSA')	NTC	BjSA
6486	EX_ala_B_e	GSMM_306	EX_4abut_e	GSMM_208	EX_g3pg_e	('NTC', 'BjSA')	NTC	BjSA
6491	EX_ala_B_e	GSMM_232	EX_5drib_e	GSMM_380	EX_g3pg_e	('NTC', 'Neutral')	NTC	Neutral
6492	EX_ala_B_e	GSMM_239	EX_5drib_e	GSMM_380	EX_g3pg_e	('NTC', 'Neutral')	NTC	Neutral
6494	EX_ala_B_e	GSMM_306	EX_5drib_e	GSMM_380	EX_g3pg_e	('NTC', 'Neutral')	NTC	Neutral
6501	EX_ala_B_e	GSMM_306	EX_gthrd_e	GSMM_380	EX_g3pg_e	('NTC', 'Neutral')	NTC	Neutral
6505	EX_ala_B_e	GSMM_232	EX_rib__D_e	GSMM_380	EX_g3pg_e	('NTC', 'Neutral')	NTC	Neutral
6506	EX_ala_B_e	GSMM_239	EX_rib__D_e	GSMM_380	EX_g3pg_e	('NTC', 'Neutral')	NTC	Neutral
6507	EX_ala_B_e	GSMM_306	EX_rib__D_e	GSMM_380	EX_g3pg_e	('NTC', 'Neutral')	NTC	Neutral
6519	EX_ala_B_e	GSMM_232	EX_glu__L_e	GSMM_380	EX_g3pg_e	('NTC', 'Neutral')	NTC	Neutral
6520	EX_ala_B_e	GSMM_306	EX_glu__L_e	GSMM_380	EX_g3pg_e	('NTC', 'Neutral')	NTC	Neutral
6525	EX_ala_B_e	GSMM_232	EX_cgly_e	GSMM_380	EX_g3pg_e	('NTC', 'Neutral')	NTC	Neutral
6527	EX_ala_B_e	GSMM_306	EX_cgly_e	GSMM_380	EX_g3pg_e	('NTC', 'Neutral')	NTC	Neutral
6532	EX_ala_B_e	GSMM_232	EX_glyc_e	GSMM_380	EX_g3pg_e	('NTC', 'Neutral')	NTC	Neutral
6533	EX_ala_B_e	GSMM_239	EX_glyc_e	GSMM_380	EX_g3pg_e	('NTC', 'Neutral')	NTC	Neutral
6541	EX_ala_B_e	GSMM_232	EX_fe3pyovd_kt_e	GSMM_380	EX_g3pg_e	('NTC', 'Neutral')	NTC	Neutral
6542	EX_ala_B_e	GSMM_239	EX_fe3pyovd_kt_e	GSMM_380	EX_g3pg_e	('NTC', 'Neutral')	NTC	Neutral
6544	EX_ala_B_e	GSMM_306	EX_fe3pyovd_kt_e	GSMM_380	EX_g3pg_e	('NTC', 'Neutral')	NTC	Neutral
6551	EX_ala_B_e	GSMM_232	EX_pyovd_kt_e	GSMM_380	EX_g3pg_e	('NTC', 'Neutral')	NTC	Neutral
6552	EX_ala_B_e	GSMM_239	EX_pyovd_kt_e	GSMM_380	EX_g3pg_e	('NTC', 'Neutral')	NTC	Neutral
6554	EX_ala_B_e	GSMM_306	EX_pyovd_kt_e	GSMM_380	EX_g3pg_e	('NTC', 'Neutral')	NTC	Neutral
6559	EX_ala_B_e	GSMM_239	EX_ser__L_e	GSMM_380	EX_g3pg_e	('NTC', 'Neutral')	NTC	Neutral
6563	EX_ala_B_e	GSMM_232	EX_urea_e	GSMM_380	EX_g3pg_e	('NTC', 'Neutral')	NTC	Neutral
6564	EX_ala_B_e	GSMM_239	EX_urea_e	GSMM_380	EX_g3pg_e	('NTC', 'Neutral')	NTC	Neutral
6566	EX_ala_B_e	GSMM_306	EX_urea_e	GSMM_380	EX_g3pg_e	('NTC', 'Neutral')	NTC	Neutral
6571	EX_ala_B_e	GSMM_239	EX_glc__D_e	GSMM_380	EX_g3pg_e	('NTC', 'Neutral')	NTC	Neutral
6572	EX_ala_B_e	GSMM_306	EX_glc__D_e	GSMM_380	EX_g3pg_e	('NTC', 'Neutral')	NTC	Neutral
6580	EX_ala_B_e	GSMM_239	EX_chol_e	GSMM_380	EX_g3pg_e	('NTC', 'Neutral')	NTC	Neutral
6587	EX_ala_B_e	GSMM_306	EX_cys__L_e	GSMM_380	EX_g3pg_e	('NTC', 'Neutral')	NTC	Neutral
6592	EX_ala_B_e	GSMM_306	EX_orn_e	GSMM_380	EX_g3pg_e	('NTC', 'Neutral')	NTC	Neutral
6598	EX_ala_B_e	GSMM_232	EX_pheme_e	GSMM_380	EX_g3pg_e	('NTC', 'Neutral')	NTC	Neutral
6599	EX_ala_B_e	GSMM_239	EX_pheme_e	GSMM_380	EX_g3pg_e	('NTC', 'Neutral')	NTC	Neutral
6604	EX_ala_B_e	GSMM_232	EX_acald_e	GSMM_380	EX_g3pg_e	('NTC', 'Neutral')	NTC	Neutral
6606	EX_ala_B_e	GSMM_306	EX_acald_e	GSMM_380	EX_g3pg_e	('NTC', 'Neutral')	NTC	Neutral
6610	EX_ala_B_e	GSMM_232	EX_ppap_e	GSMM_380	EX_g3pg_e	('NTC', 'Neutral')	NTC	Neutral
6611	EX_ala_B_e	GSMM_306	EX_ppap_e	GSMM_380	EX_g3pg_e	('NTC', 'Neutral')	NTC	Neutral
6613	EX_ala_B_e	GSMM_239	EX_succ_e	GSMM_380	EX_g3pg_e	('NTC', 'Neutral')	NTC	Neutral
6616	EX_ala_B_e	GSMM_232	EX_gal_e	GSMM_380	EX_g3pg_e	('NTC', 'Neutral')	NTC	Neutral
6617	EX_ala_B_e	GSMM_239	EX_gal_e	GSMM_380	EX_g3pg_e	('NTC', 'Neutral')	NTC	Neutral
6622	EX_ala_B_e	GSMM_232	EX_ala__D_e	GSMM_380	EX_g3pg_e	('NTC', 'Neutral')	NTC	Neutral
6623	EX_ala_B_e	GSMM_239	EX_ala__D_e	GSMM_380	EX_g3pg_e	('NTC', 'Neutral')	NTC	Neutral
6625	EX_ala_B_e	GSMM_306	EX_ala__D_e	GSMM_380	EX_g3pg_e	('NTC', 'Neutral')	NTC	Neutral
6629	EX_ala_B_e	GSMM_232	EX_glyb_e	GSMM_380	EX_g3pg_e	('NTC', 'Neutral')	NTC	Neutral
6634	EX_ala_B_e	GSMM_239	EX_glcn_e	GSMM_380	EX_g3pg_e	('NTC', 'Neutral')	NTC	Neutral
6635	EX_ala_B_e	GSMM_306	EX_glcn_e	GSMM_380	EX_g3pg_e	('NTC', 'Neutral')	NTC	Neutral
6640	EX_ala_B_e	GSMM_232	EX_lys__L_e	GSMM_380	EX_g3pg_e	('NTC', 'Neutral')	NTC	Neutral
6643	EX_ala_B_e	GSMM_306	EX_ptrc_e	GSMM_380	EX_g3pg_e	('NTC', 'Neutral')	NTC	Neutral
6648	EX_ala_B_e	GSMM_232	EX_indole_e	GSMM_380	EX_g3pg_e	('NTC', 'Neutral')	NTC	Neutral
6651	EX_ala_B_e	GSMM_232	EX_meoh_e	GSMM_380	EX_g3pg_e	('NTC', 'Neutral')	NTC	Neutral
6652	EX_ala_B_e	GSMM_306	EX_meoh_e	GSMM_380	EX_g3pg_e	('NTC', 'Neutral')	NTC	Neutral
6655	EX_ala_B_e	GSMM_232	EX_enter_e	GSMM_380	EX_g3pg_e	('NTC', 'Neutral')	NTC	Neutral
6656	EX_ala_B_e	GSMM_232	EX_R_3hpt_e	GSMM_380	EX_g3pg_e	('NTC', 'Neutral')	NTC	Neutral
6657	EX_ala_B_e	GSMM_306	EX_R_3hpt_e	GSMM_380	EX_g3pg_e	('NTC', 'Neutral')	NTC	Neutral
6658	EX_ala_B_e	GSMM_239	EX_anhgm_e	GSMM_380	EX_g3pg_e	('NTC', 'Neutral')	NTC	Neutral
6662	EX_ala_B_e	GSMM_306	EX_glyald_e	GSMM_380	EX_g3pg_e	('NTC', 'Neutral')	NTC	Neutral
6670	EX_ala_B_e	GSMM_306	EX_gthrd_e	GSMM_015	EX_bz_e	('NTC', 'Neutral')	NTC	Neutral
6674	EX_ala_B_e	GSMM_232	EX_etoh_e	GSMM_015	EX_bz_e	('NTC', 'Neutral')	NTC	Neutral
6675	EX_ala_B_e	GSMM_239	EX_etoh_e	GSMM_015	EX_bz_e	('NTC', 'Neutral')	NTC	Neutral
6681	EX_ala_B_e	GSMM_239	EX_glyc3p_e	GSMM_015	EX_bz_e	('NTC', 'Neutral')	NTC	Neutral
6687	EX_ala_B_e	GSMM_306	EX_ch4s_e	GSMM_015	EX_bz_e	('NTC', 'Neutral')	NTC	Neutral
6693	EX_ala_B_e	GSMM_232	EX_fald_e	GSMM_015	EX_bz_e	('NTC', 'Neutral')	NTC	Neutral
6695	EX_ala_B_e	GSMM_306	EX_fald_e	GSMM_015	EX_bz_e	('NTC', 'Neutral')	NTC	Neutral
6702	EX_ala_B_e	GSMM_306	EX_4hbz_e	GSMM_015	EX_bz_e	('NTC', 'Neutral')	NTC	Neutral
6714	EX_ala_B_e	GSMM_232	EX_spmd_e	GSMM_015	EX_bz_e	('NTC', 'Neutral')	NTC	Neutral
6715	EX_ala_B_e	GSMM_239	EX_spmd_e	GSMM_015	EX_bz_e	('NTC', 'Neutral')	NTC	Neutral
6718	EX_ala_B_e	GSMM_232	EX_4hbald_e	GSMM_015	EX_bz_e	('NTC', 'Neutral')	NTC	Neutral
6724	EX_ala_B_e	GSMM_232	EX_cgly_e	GSMM_015	EX_bz_e	('NTC', 'Neutral')	NTC	Neutral
6726	EX_ala_B_e	GSMM_306	EX_cgly_e	GSMM_015	EX_bz_e	('NTC', 'Neutral')	NTC	Neutral
6731	EX_ala_B_e	GSMM_232	EX_glyc_e	GSMM_015	EX_bz_e	('NTC', 'Neutral')	NTC	Neutral
6732	EX_ala_B_e	GSMM_239	EX_glyc_e	GSMM_015	EX_bz_e	('NTC', 'Neutral')	NTC	Neutral
6740	EX_ala_B_e	GSMM_232	EX_fe3pyovd_kt_e	GSMM_015	EX_bz_e	('NTC', 'Neutral')	NTC	Neutral
6741	EX_ala_B_e	GSMM_239	EX_fe3pyovd_kt_e	GSMM_015	EX_bz_e	('NTC', 'Neutral')	NTC	Neutral
6743	EX_ala_B_e	GSMM_306	EX_fe3pyovd_kt_e	GSMM_015	EX_bz_e	('NTC', 'Neutral')	NTC	Neutral
6750	EX_ala_B_e	GSMM_232	EX_pyovd_kt_e	GSMM_015	EX_bz_e	('NTC', 'Neutral')	NTC	Neutral
6751	EX_ala_B_e	GSMM_239	EX_pyovd_kt_e	GSMM_015	EX_bz_e	('NTC', 'Neutral')	NTC	Neutral
6753	EX_ala_B_e	GSMM_306	EX_pyovd_kt_e	GSMM_015	EX_bz_e	('NTC', 'Neutral')	NTC	Neutral
6758	EX_ala_B_e	GSMM_239	EX_ser__L_e	GSMM_015	EX_bz_e	('NTC', 'Neutral')	NTC	Neutral
6764	EX_ala_B_e	GSMM_232	EX_ind3ac_e	GSMM_015	EX_bz_e	('NTC', 'Neutral')	NTC	Neutral
6765	EX_ala_B_e	GSMM_239	EX_ind3ac_e	GSMM_015	EX_bz_e	('NTC', 'Neutral')	NTC	Neutral
6767	EX_ala_B_e	GSMM_306	EX_ind3ac_e	GSMM_015	EX_bz_e	('NTC', 'Neutral')	NTC	Neutral
6772	EX_ala_B_e	GSMM_232	EX_urea_e	GSMM_015	EX_bz_e	('NTC', 'Neutral')	NTC	Neutral
6773	EX_ala_B_e	GSMM_239	EX_urea_e	GSMM_015	EX_bz_e	('NTC', 'Neutral')	NTC	Neutral
6775	EX_ala_B_e	GSMM_306	EX_urea_e	GSMM_015	EX_bz_e	('NTC', 'Neutral')	NTC	Neutral
6780	EX_ala_B_e	GSMM_239	EX_glc__D_e	GSMM_015	EX_bz_e	('NTC', 'Neutral')	NTC	Neutral
6781	EX_ala_B_e	GSMM_306	EX_glc__D_e	GSMM_015	EX_bz_e	('NTC', 'Neutral')	NTC	Neutral
6789	EX_ala_B_e	GSMM_239	EX_chol_e	GSMM_015	EX_bz_e	('NTC', 'Neutral')	NTC	Neutral
6795	EX_ala_B_e	GSMM_306	EX_orn_e	GSMM_015	EX_bz_e	('NTC', 'Neutral')	NTC	Neutral
6801	EX_ala_B_e	GSMM_232	EX_pheme_e	GSMM_015	EX_bz_e	('NTC', 'Neutral')	NTC	Neutral
6802	EX_ala_B_e	GSMM_239	EX_pheme_e	GSMM_015	EX_bz_e	('NTC', 'Neutral')	NTC	Neutral
6807	EX_ala_B_e	GSMM_232	EX_acald_e	GSMM_015	EX_bz_e	('NTC', 'Neutral')	NTC	Neutral
6809	EX_ala_B_e	GSMM_306	EX_acald_e	GSMM_015	EX_bz_e	('NTC', 'Neutral')	NTC	Neutral
6820	EX_ala_B_e	GSMM_232	EX_glyb_e	GSMM_015	EX_bz_e	('NTC', 'Neutral')	NTC	Neutral
6829	EX_ala_B_e	GSMM_239	EX_glcn_e	GSMM_015	EX_bz_e	('NTC', 'Neutral')	NTC	Neutral
6830	EX_ala_B_e	GSMM_306	EX_glcn_e	GSMM_015	EX_bz_e	('NTC', 'Neutral')	NTC	Neutral
6832	EX_ala_B_e	GSMM_232	EX_for_e	GSMM_015	EX_bz_e	('NTC', 'Neutral')	NTC	Neutral
6838	EX_ala_B_e	GSMM_232	EX_lys__L_e	GSMM_015	EX_bz_e	('NTC', 'Neutral')	NTC	Neutral
6841	EX_ala_B_e	GSMM_306	EX_ptrc_e	GSMM_015	EX_bz_e	('NTC', 'Neutral')	NTC	Neutral
6844	EX_ala_B_e	GSMM_232	EX_gua_e	GSMM_015	EX_bz_e	('NTC', 'Neutral')	NTC	Neutral
6848	EX_ala_B_e	GSMM_232	EX_oxa_e	GSMM_015	EX_bz_e	('NTC', 'Neutral')	NTC	Neutral
6849	EX_ala_B_e	GSMM_239	EX_oxa_e	GSMM_015	EX_bz_e	('NTC', 'Neutral')	NTC	Neutral
6850	EX_ala_B_e	GSMM_306	EX_oxa_e	GSMM_015	EX_bz_e	('NTC', 'Neutral')	NTC	Neutral
6856	EX_ala_B_e	GSMM_232	EX_indole_e	GSMM_015	EX_bz_e	('NTC', 'Neutral')	NTC	Neutral
6859	EX_ala_B_e	GSMM_232	EX_meoh_e	GSMM_015	EX_bz_e	('NTC', 'Neutral')	NTC	Neutral
6860	EX_ala_B_e	GSMM_306	EX_meoh_e	GSMM_015	EX_bz_e	('NTC', 'Neutral')	NTC	Neutral
6865	EX_ala_B_e	GSMM_232	EX_enter_e	GSMM_015	EX_bz_e	('NTC', 'Neutral')	NTC	Neutral
6866	EX_ala_B_e	GSMM_232	EX_R_3hpt_e	GSMM_015	EX_bz_e	('NTC', 'Neutral')	NTC	Neutral
6867	EX_ala_B_e	GSMM_306	EX_R_3hpt_e	GSMM_015	EX_bz_e	('NTC', 'Neutral')	NTC	Neutral
6868	EX_ala_B_e	GSMM_232	EX_lac__L_e	GSMM_015	EX_bz_e	('NTC', 'Neutral')	NTC	Neutral
6869	EX_ala_B_e	GSMM_306	EX_lac__L_e	GSMM_015	EX_bz_e	('NTC', 'Neutral')	NTC	Neutral
6871	EX_ala_B_e	GSMM_232	EX_glcr_e	GSMM_015	EX_bz_e	('NTC', 'Neutral')	NTC	Neutral
6873	EX_ala_B_e	GSMM_232	EX_hxan_e	GSMM_015	EX_bz_e	('NTC', 'Neutral')	NTC	Neutral
6874	EX_ala_B_e	GSMM_239	EX_acac_e	GSMM_015	EX_bz_e	('NTC', 'Neutral')	NTC	Neutral
6883	EX_ala_B_e	GSMM_232	EX_5drib_e	GSMM_122	EX_asp__L_e	('NTC', 'Neutral')	NTC	Neutral
6884	EX_ala_B_e	GSMM_239	EX_5drib_e	GSMM_122	EX_asp__L_e	('NTC', 'Neutral')	NTC	Neutral
6886	EX_ala_B_e	GSMM_306	EX_5drib_e	GSMM_122	EX_asp__L_e	('NTC', 'Neutral')	NTC	Neutral
6893	EX_ala_B_e	GSMM_306	EX_gthrd_e	GSMM_122	EX_asp__L_e	('NTC', 'Neutral')	NTC	Neutral
6897	EX_ala_B_e	GSMM_232	EX_etoh_e	GSMM_122	EX_asp__L_e	('NTC', 'Neutral')	NTC	Neutral
6898	EX_ala_B_e	GSMM_239	EX_etoh_e	GSMM_122	EX_asp__L_e	('NTC', 'Neutral')	NTC	Neutral
6904	EX_ala_B_e	GSMM_239	EX_glyc3p_e	GSMM_122	EX_asp__L_e	('NTC', 'Neutral')	NTC	Neutral
6910	EX_ala_B_e	GSMM_306	EX_ch4s_e	GSMM_122	EX_asp__L_e	('NTC', 'Neutral')	NTC	Neutral
6914	EX_ala_B_e	GSMM_232	EX_5mdru1p_e	GSMM_122	EX_asp__L_e	('NTC', 'Neutral')	NTC	Neutral
6915	EX_ala_B_e	GSMM_239	EX_5mdru1p_e	GSMM_122	EX_asp__L_e	('NTC', 'Neutral')	NTC	Neutral
6921	EX_ala_B_e	GSMM_232	EX_fald_e	GSMM_122	EX_asp__L_e	('NTC', 'Neutral')	NTC	Neutral
6923	EX_ala_B_e	GSMM_306	EX_fald_e	GSMM_122	EX_asp__L_e	('NTC', 'Neutral')	NTC	Neutral
6929	EX_ala_B_e	GSMM_232	EX_rib__D_e	GSMM_122	EX_asp__L_e	('NTC', 'Neutral')	NTC	Neutral
6930	EX_ala_B_e	GSMM_239	EX_rib__D_e	GSMM_122	EX_asp__L_e	('NTC', 'Neutral')	NTC	Neutral
6931	EX_ala_B_e	GSMM_306	EX_rib__D_e	GSMM_122	EX_asp__L_e	('NTC', 'Neutral')	NTC	Neutral
6938	EX_ala_B_e	GSMM_306	EX_4hbz_e	GSMM_122	EX_asp__L_e	('NTC', 'Neutral')	NTC	Neutral
6950	EX_ala_B_e	GSMM_232	EX_spmd_e	GSMM_122	EX_asp__L_e	('NTC', 'Neutral')	NTC	Neutral
6951	EX_ala_B_e	GSMM_239	EX_spmd_e	GSMM_122	EX_asp__L_e	('NTC', 'Neutral')	NTC	Neutral
6955	EX_ala_B_e	GSMM_232	EX_glu__L_e	GSMM_122	EX_asp__L_e	('NTC', 'Neutral')	NTC	Neutral
6956	EX_ala_B_e	GSMM_306	EX_glu__L_e	GSMM_122	EX_asp__L_e	('NTC', 'Neutral')	NTC	Neutral
6959	EX_ala_B_e	GSMM_232	EX_4hbald_e	GSMM_122	EX_asp__L_e	('NTC', 'Neutral')	NTC	Neutral
6965	EX_ala_B_e	GSMM_232	EX_cgly_e	GSMM_122	EX_asp__L_e	('NTC', 'Neutral')	NTC	Neutral
6967	EX_ala_B_e	GSMM_306	EX_cgly_e	GSMM_122	EX_asp__L_e	('NTC', 'Neutral')	NTC	Neutral
6972	EX_ala_B_e	GSMM_232	EX_glyc_e	GSMM_122	EX_asp__L_e	('NTC', 'Neutral')	NTC	Neutral
6973	EX_ala_B_e	GSMM_239	EX_glyc_e	GSMM_122	EX_asp__L_e	('NTC', 'Neutral')	NTC	Neutral
6981	EX_ala_B_e	GSMM_232	EX_fe3pyovd_kt_e	GSMM_122	EX_asp__L_e	('NTC', 'Neutral')	NTC	Neutral
6982	EX_ala_B_e	GSMM_239	EX_fe3pyovd_kt_e	GSMM_122	EX_asp__L_e	('NTC', 'Neutral')	NTC	Neutral
6984	EX_ala_B_e	GSMM_306	EX_fe3pyovd_kt_e	GSMM_122	EX_asp__L_e	('NTC', 'Neutral')	NTC	Neutral
6991	EX_ala_B_e	GSMM_232	EX_pyovd_kt_e	GSMM_122	EX_asp__L_e	('NTC', 'Neutral')	NTC	Neutral
6992	EX_ala_B_e	GSMM_239	EX_pyovd_kt_e	GSMM_122	EX_asp__L_e	('NTC', 'Neutral')	NTC	Neutral
6994	EX_ala_B_e	GSMM_306	EX_pyovd_kt_e	GSMM_122	EX_asp__L_e	('NTC', 'Neutral')	NTC	Neutral
6999	EX_ala_B_e	GSMM_239	EX_ser__L_e	GSMM_122	EX_asp__L_e	('NTC', 'Neutral')	NTC	Neutral
7005	EX_ala_B_e	GSMM_232	EX_ind3ac_e	GSMM_122	EX_asp__L_e	('NTC', 'Neutral')	NTC	Neutral
7006	EX_ala_B_e	GSMM_239	EX_ind3ac_e	GSMM_122	EX_asp__L_e	('NTC', 'Neutral')	NTC	Neutral
7008	EX_ala_B_e	GSMM_306	EX_ind3ac_e	GSMM_122	EX_asp__L_e	('NTC', 'Neutral')	NTC	Neutral
7013	EX_ala_B_e	GSMM_232	EX_urea_e	GSMM_122	EX_asp__L_e	('NTC', 'Neutral')	NTC	Neutral
7014	EX_ala_B_e	GSMM_239	EX_urea_e	GSMM_122	EX_asp__L_e	('NTC', 'Neutral')	NTC	Neutral
7016	EX_ala_B_e	GSMM_306	EX_urea_e	GSMM_122	EX_asp__L_e	('NTC', 'Neutral')	NTC	Neutral
7021	EX_ala_B_e	GSMM_239	EX_glc__D_e	GSMM_122	EX_asp__L_e	('NTC', 'Neutral')	NTC	Neutral
7022	EX_ala_B_e	GSMM_306	EX_glc__D_e	GSMM_122	EX_asp__L_e	('NTC', 'Neutral')	NTC	Neutral
7029	EX_ala_B_e	GSMM_239	EX_chol_e	GSMM_122	EX_asp__L_e	('NTC', 'Neutral')	NTC	Neutral
7036	EX_ala_B_e	GSMM_306	EX_cys__L_e	GSMM_122	EX_asp__L_e	('NTC', 'Neutral')	NTC	Neutral
7041	EX_ala_B_e	GSMM_306	EX_orn_e	GSMM_122	EX_asp__L_e	('NTC', 'Neutral')	NTC	Neutral
7047	EX_ala_B_e	GSMM_232	EX_pheme_e	GSMM_122	EX_asp__L_e	('NTC', 'Neutral')	NTC	Neutral
7048	EX_ala_B_e	GSMM_239	EX_pheme_e	GSMM_122	EX_asp__L_e	('NTC', 'Neutral')	NTC	Neutral
7053	EX_ala_B_e	GSMM_232	EX_acald_e	GSMM_122	EX_asp__L_e	('NTC', 'Neutral')	NTC	Neutral
7055	EX_ala_B_e	GSMM_306	EX_acald_e	GSMM_122	EX_asp__L_e	('NTC', 'Neutral')	NTC	Neutral
7059	EX_ala_B_e	GSMM_232	EX_ppap_e	GSMM_122	EX_asp__L_e	('NTC', 'Neutral')	NTC	Neutral
7060	EX_ala_B_e	GSMM_306	EX_ppap_e	GSMM_122	EX_asp__L_e	('NTC', 'Neutral')	NTC	Neutral
7062	EX_ala_B_e	GSMM_239	EX_succ_e	GSMM_122	EX_asp__L_e	('NTC', 'Neutral')	NTC	Neutral
7070	EX_ala_B_e	GSMM_232	EX_gal_e	GSMM_122	EX_asp__L_e	('NTC', 'Neutral')	NTC	Neutral
7071	EX_ala_B_e	GSMM_239	EX_gal_e	GSMM_122	EX_asp__L_e	('NTC', 'Neutral')	NTC	Neutral
7076	EX_ala_B_e	GSMM_232	EX_glyb_e	GSMM_122	EX_asp__L_e	('NTC', 'Neutral')	NTC	Neutral
7081	EX_ala_B_e	GSMM_239	EX_etha_e	GSMM_122	EX_asp__L_e	('NTC', 'Neutral')	NTC	Neutral
7087	EX_ala_B_e	GSMM_239	EX_glcn_e	GSMM_122	EX_asp__L_e	('NTC', 'Neutral')	NTC	Neutral
7088	EX_ala_B_e	GSMM_306	EX_glcn_e	GSMM_122	EX_asp__L_e	('NTC', 'Neutral')	NTC	Neutral
7090	EX_ala_B_e	GSMM_232	EX_for_e	GSMM_122	EX_asp__L_e	('NTC', 'Neutral')	NTC	Neutral
7096	EX_ala_B_e	GSMM_232	EX_lys__L_e	GSMM_122	EX_asp__L_e	('NTC', 'Neutral')	NTC	Neutral
7099	EX_ala_B_e	GSMM_306	EX_ptrc_e	GSMM_122	EX_asp__L_e	('NTC', 'Neutral')	NTC	Neutral
7102	EX_ala_B_e	GSMM_232	EX_gua_e	GSMM_122	EX_asp__L_e	('NTC', 'Neutral')	NTC	Neutral
7107	EX_ala_B_e	GSMM_232	EX_oxa_e	GSMM_122	EX_asp__L_e	('NTC', 'Neutral')	NTC	Neutral
7108	EX_ala_B_e	GSMM_239	EX_oxa_e	GSMM_122	EX_asp__L_e	('NTC', 'Neutral')	NTC	Neutral
7109	EX_ala_B_e	GSMM_306	EX_oxa_e	GSMM_122	EX_asp__L_e	('NTC', 'Neutral')	NTC	Neutral
7115	EX_ala_B_e	GSMM_232	EX_indole_e	GSMM_122	EX_asp__L_e	('NTC', 'Neutral')	NTC	Neutral
7118	EX_ala_B_e	GSMM_232	EX_meoh_e	GSMM_122	EX_asp__L_e	('NTC', 'Neutral')	NTC	Neutral
7119	EX_ala_B_e	GSMM_306	EX_meoh_e	GSMM_122	EX_asp__L_e	('NTC', 'Neutral')	NTC	Neutral
7122	EX_ala_B_e	GSMM_232	EX_enter_e	GSMM_122	EX_asp__L_e	('NTC', 'Neutral')	NTC	Neutral
7123	EX_ala_B_e	GSMM_232	EX_lac__L_e	GSMM_122	EX_asp__L_e	('NTC', 'Neutral')	NTC	Neutral
7124	EX_ala_B_e	GSMM_306	EX_lac__L_e	GSMM_122	EX_asp__L_e	('NTC', 'Neutral')	NTC	Neutral
7126	EX_ala_B_e	GSMM_232	EX_hxan_e	GSMM_122	EX_asp__L_e	('NTC', 'Neutral')	NTC	Neutral
7127	EX_ala_B_e	GSMM_239	EX_acac_e	GSMM_122	EX_asp__L_e	('NTC', 'Neutral')	NTC	Neutral
7128	EX_ala_B_e	GSMM_239	EX_anhgm_e	GSMM_122	EX_asp__L_e	('NTC', 'Neutral')	NTC	Neutral
7131	EX_ala_B_e	GSMM_239	EX_udcpp_e	GSMM_122	EX_asp__L_e	('NTC', 'Neutral')	NTC	Neutral
7135	EX_ala_B_e	GSMM_306	EX_4abut_e	GSMM_122	EX_asp__L_e	('NTC', 'Neutral')	NTC	Neutral
7147	EX_ala_B_e	GSMM_232	EX_5drib_e	GSMM_230	EX_asp__L_e	('NTC', 'Neutral')	NTC	Neutral
7148	EX_ala_B_e	GSMM_239	EX_5drib_e	GSMM_230	EX_asp__L_e	('NTC', 'Neutral')	NTC	Neutral
7150	EX_ala_B_e	GSMM_306	EX_5drib_e	GSMM_230	EX_asp__L_e	('NTC', 'Neutral')	NTC	Neutral
7157	EX_ala_B_e	GSMM_306	EX_gthrd_e	GSMM_230	EX_asp__L_e	('NTC', 'Neutral')	NTC	Neutral
7161	EX_ala_B_e	GSMM_232	EX_etoh_e	GSMM_230	EX_asp__L_e	('NTC', 'Neutral')	NTC	Neutral
7162	EX_ala_B_e	GSMM_239	EX_etoh_e	GSMM_230	EX_asp__L_e	('NTC', 'Neutral')	NTC	Neutral
7168	EX_ala_B_e	GSMM_239	EX_glyc3p_e	GSMM_230	EX_asp__L_e	('NTC', 'Neutral')	NTC	Neutral
7171	EX_ala_B_e	GSMM_232	EX_5mdru1p_e	GSMM_230	EX_asp__L_e	('NTC', 'Neutral')	NTC	Neutral
7172	EX_ala_B_e	GSMM_239	EX_5mdru1p_e	GSMM_230	EX_asp__L_e	('NTC', 'Neutral')	NTC	Neutral
7178	EX_ala_B_e	GSMM_232	EX_fald_e	GSMM_230	EX_asp__L_e	('NTC', 'Neutral')	NTC	Neutral
7180	EX_ala_B_e	GSMM_306	EX_fald_e	GSMM_230	EX_asp__L_e	('NTC', 'Neutral')	NTC	Neutral
7186	EX_ala_B_e	GSMM_232	EX_rib__D_e	GSMM_230	EX_asp__L_e	('NTC', 'Neutral')	NTC	Neutral
7187	EX_ala_B_e	GSMM_239	EX_rib__D_e	GSMM_230	EX_asp__L_e	('NTC', 'Neutral')	NTC	Neutral
7188	EX_ala_B_e	GSMM_306	EX_rib__D_e	GSMM_230	EX_asp__L_e	('NTC', 'Neutral')	NTC	Neutral
7195	EX_ala_B_e	GSMM_306	EX_4hbz_e	GSMM_230	EX_asp__L_e	('NTC', 'Neutral')	NTC	Neutral
7207	EX_ala_B_e	GSMM_232	EX_spmd_e	GSMM_230	EX_asp__L_e	('NTC', 'Neutral')	NTC	Neutral
7208	EX_ala_B_e	GSMM_239	EX_spmd_e	GSMM_230	EX_asp__L_e	('NTC', 'Neutral')	NTC	Neutral
7212	EX_ala_B_e	GSMM_232	EX_glu__L_e	GSMM_230	EX_asp__L_e	('NTC', 'Neutral')	NTC	Neutral
7213	EX_ala_B_e	GSMM_306	EX_glu__L_e	GSMM_230	EX_asp__L_e	('NTC', 'Neutral')	NTC	Neutral
7216	EX_ala_B_e	GSMM_232	EX_4hbald_e	GSMM_230	EX_asp__L_e	('NTC', 'Neutral')	NTC	Neutral
7222	EX_ala_B_e	GSMM_232	EX_cgly_e	GSMM_230	EX_asp__L_e	('NTC', 'Neutral')	NTC	Neutral
7224	EX_ala_B_e	GSMM_306	EX_cgly_e	GSMM_230	EX_asp__L_e	('NTC', 'Neutral')	NTC	Neutral
7229	EX_ala_B_e	GSMM_232	EX_glyc_e	GSMM_230	EX_asp__L_e	('NTC', 'Neutral')	NTC	Neutral
7230	EX_ala_B_e	GSMM_239	EX_glyc_e	GSMM_230	EX_asp__L_e	('NTC', 'Neutral')	NTC	Neutral
7238	EX_ala_B_e	GSMM_232	EX_fe3pyovd_kt_e	GSMM_230	EX_asp__L_e	('NTC', 'Neutral')	NTC	Neutral
7239	EX_ala_B_e	GSMM_239	EX_fe3pyovd_kt_e	GSMM_230	EX_asp__L_e	('NTC', 'Neutral')	NTC	Neutral
7241	EX_ala_B_e	GSMM_306	EX_fe3pyovd_kt_e	GSMM_230	EX_asp__L_e	('NTC', 'Neutral')	NTC	Neutral
7248	EX_ala_B_e	GSMM_232	EX_pyovd_kt_e	GSMM_230	EX_asp__L_e	('NTC', 'Neutral')	NTC	Neutral
7249	EX_ala_B_e	GSMM_239	EX_pyovd_kt_e	GSMM_230	EX_asp__L_e	('NTC', 'Neutral')	NTC	Neutral
7251	EX_ala_B_e	GSMM_306	EX_pyovd_kt_e	GSMM_230	EX_asp__L_e	('NTC', 'Neutral')	NTC	Neutral
7256	EX_ala_B_e	GSMM_239	EX_ser__L_e	GSMM_230	EX_asp__L_e	('NTC', 'Neutral')	NTC	Neutral
7262	EX_ala_B_e	GSMM_232	EX_ind3ac_e	GSMM_230	EX_asp__L_e	('NTC', 'Neutral')	NTC	Neutral
7263	EX_ala_B_e	GSMM_239	EX_ind3ac_e	GSMM_230	EX_asp__L_e	('NTC', 'Neutral')	NTC	Neutral
7265	EX_ala_B_e	GSMM_306	EX_ind3ac_e	GSMM_230	EX_asp__L_e	('NTC', 'Neutral')	NTC	Neutral
7271	EX_ala_B_e	GSMM_239	EX_glc__D_e	GSMM_230	EX_asp__L_e	('NTC', 'Neutral')	NTC	Neutral
7272	EX_ala_B_e	GSMM_306	EX_glc__D_e	GSMM_230	EX_asp__L_e	('NTC', 'Neutral')	NTC	Neutral
7280	EX_ala_B_e	GSMM_239	EX_chol_e	GSMM_230	EX_asp__L_e	('NTC', 'Neutral')	NTC	Neutral
7287	EX_ala_B_e	GSMM_306	EX_cys__L_e	GSMM_230	EX_asp__L_e	('NTC', 'Neutral')	NTC	Neutral
7292	EX_ala_B_e	GSMM_306	EX_orn_e	GSMM_230	EX_asp__L_e	('NTC', 'Neutral')	NTC	Neutral
7298	EX_ala_B_e	GSMM_232	EX_pheme_e	GSMM_230	EX_asp__L_e	('NTC', 'Neutral')	NTC	Neutral
7299	EX_ala_B_e	GSMM_239	EX_pheme_e	GSMM_230	EX_asp__L_e	('NTC', 'Neutral')	NTC	Neutral
7304	EX_ala_B_e	GSMM_232	EX_acald_e	GSMM_230	EX_asp__L_e	('NTC', 'Neutral')	NTC	Neutral
7306	EX_ala_B_e	GSMM_306	EX_acald_e	GSMM_230	EX_asp__L_e	('NTC', 'Neutral')	NTC	Neutral
7312	EX_ala_B_e	GSMM_239	EX_succ_e	GSMM_230	EX_asp__L_e	('NTC', 'Neutral')	NTC	Neutral
7320	EX_ala_B_e	GSMM_232	EX_gal_e	GSMM_230	EX_asp__L_e	('NTC', 'Neutral')	NTC	Neutral
7321	EX_ala_B_e	GSMM_239	EX_gal_e	GSMM_230	EX_asp__L_e	('NTC', 'Neutral')	NTC	Neutral
7326	EX_ala_B_e	GSMM_232	EX_glyb_e	GSMM_230	EX_asp__L_e	('NTC', 'Neutral')	NTC	Neutral
7333	EX_ala_B_e	GSMM_239	EX_glcn_e	GSMM_230	EX_asp__L_e	('NTC', 'Neutral')	NTC	Neutral
7334	EX_ala_B_e	GSMM_306	EX_glcn_e	GSMM_230	EX_asp__L_e	('NTC', 'Neutral')	NTC	Neutral
7336	EX_ala_B_e	GSMM_232	EX_for_e	GSMM_230	EX_asp__L_e	('NTC', 'Neutral')	NTC	Neutral
7342	EX_ala_B_e	GSMM_232	EX_lys__L_e	GSMM_230	EX_asp__L_e	('NTC', 'Neutral')	NTC	Neutral
7345	EX_ala_B_e	GSMM_306	EX_ptrc_e	GSMM_230	EX_asp__L_e	('NTC', 'Neutral')	NTC	Neutral
7348	EX_ala_B_e	GSMM_232	EX_gua_e	GSMM_230	EX_asp__L_e	('NTC', 'Neutral')	NTC	Neutral
7353	EX_ala_B_e	GSMM_232	EX_oxa_e	GSMM_230	EX_asp__L_e	('NTC', 'Neutral')	NTC	Neutral
7354	EX_ala_B_e	GSMM_239	EX_oxa_e	GSMM_230	EX_asp__L_e	('NTC', 'Neutral')	NTC	Neutral
7355	EX_ala_B_e	GSMM_306	EX_oxa_e	GSMM_230	EX_asp__L_e	('NTC', 'Neutral')	NTC	Neutral
7361	EX_ala_B_e	GSMM_232	EX_indole_e	GSMM_230	EX_asp__L_e	('NTC', 'Neutral')	NTC	Neutral
7364	EX_ala_B_e	GSMM_232	EX_meoh_e	GSMM_230	EX_asp__L_e	('NTC', 'Neutral')	NTC	Neutral
7365	EX_ala_B_e	GSMM_306	EX_meoh_e	GSMM_230	EX_asp__L_e	('NTC', 'Neutral')	NTC	Neutral
7370	EX_ala_B_e	GSMM_232	EX_5dglcn_e	GSMM_230	EX_asp__L_e	('NTC', 'Neutral')	NTC	Neutral
7372	EX_ala_B_e	GSMM_232	EX_enter_e	GSMM_230	EX_asp__L_e	('NTC', 'Neutral')	NTC	Neutral
7373	EX_ala_B_e	GSMM_232	EX_lac__L_e	GSMM_230	EX_asp__L_e	('NTC', 'Neutral')	NTC	Neutral
7374	EX_ala_B_e	GSMM_306	EX_lac__L_e	GSMM_230	EX_asp__L_e	('NTC', 'Neutral')	NTC	Neutral
7376	EX_ala_B_e	GSMM_232	EX_hxan_e	GSMM_230	EX_asp__L_e	('NTC', 'Neutral')	NTC	Neutral
7377	EX_ala_B_e	GSMM_239	EX_acac_e	GSMM_230	EX_asp__L_e	('NTC', 'Neutral')	NTC	Neutral
7379	EX_ala_B_e	GSMM_306	EX_glyald_e	GSMM_230	EX_asp__L_e	('NTC', 'Neutral')	NTC	Neutral
7383	EX_ala_B_e	GSMM_306	EX_4abut_e	GSMM_230	EX_asp__L_e	('NTC', 'Neutral')	NTC	Neutral
7394	EX_ala_B_e	GSMM_232	EX_5drib_e	GSMM_323	EX_asp__L_e	('NTC', 'Neutral')	NTC	Neutral
7395	EX_ala_B_e	GSMM_239	EX_5drib_e	GSMM_323	EX_asp__L_e	('NTC', 'Neutral')	NTC	Neutral
7397	EX_ala_B_e	GSMM_306	EX_5drib_e	GSMM_323	EX_asp__L_e	('NTC', 'Neutral')	NTC	Neutral
7404	EX_ala_B_e	GSMM_306	EX_gthrd_e	GSMM_323	EX_asp__L_e	('NTC', 'Neutral')	NTC	Neutral
7408	EX_ala_B_e	GSMM_232	EX_etoh_e	GSMM_323	EX_asp__L_e	('NTC', 'Neutral')	NTC	Neutral
7409	EX_ala_B_e	GSMM_239	EX_etoh_e	GSMM_323	EX_asp__L_e	('NTC', 'Neutral')	NTC	Neutral
7415	EX_ala_B_e	GSMM_239	EX_glyc3p_e	GSMM_323	EX_asp__L_e	('NTC', 'Neutral')	NTC	Neutral
7420	EX_ala_B_e	GSMM_232	EX_fald_e	GSMM_323	EX_asp__L_e	('NTC', 'Neutral')	NTC	Neutral
7422	EX_ala_B_e	GSMM_306	EX_fald_e	GSMM_323	EX_asp__L_e	('NTC', 'Neutral')	NTC	Neutral
7428	EX_ala_B_e	GSMM_232	EX_rib__D_e	GSMM_323	EX_asp__L_e	('NTC', 'Neutral')	NTC	Neutral
7429	EX_ala_B_e	GSMM_239	EX_rib__D_e	GSMM_323	EX_asp__L_e	('NTC', 'Neutral')	NTC	Neutral
7430	EX_ala_B_e	GSMM_306	EX_rib__D_e	GSMM_323	EX_asp__L_e	('NTC', 'Neutral')	NTC	Neutral
7437	EX_ala_B_e	GSMM_306	EX_4hbz_e	GSMM_323	EX_asp__L_e	('NTC', 'Neutral')	NTC	Neutral
7449	EX_ala_B_e	GSMM_232	EX_spmd_e	GSMM_323	EX_asp__L_e	('NTC', 'Neutral')	NTC	Neutral
7450	EX_ala_B_e	GSMM_239	EX_spmd_e	GSMM_323	EX_asp__L_e	('NTC', 'Neutral')	NTC	Neutral
7454	EX_ala_B_e	GSMM_232	EX_glu__L_e	GSMM_323	EX_asp__L_e	('NTC', 'Neutral')	NTC	Neutral
7455	EX_ala_B_e	GSMM_306	EX_glu__L_e	GSMM_323	EX_asp__L_e	('NTC', 'Neutral')	NTC	Neutral
7458	EX_ala_B_e	GSMM_232	EX_4hbald_e	GSMM_323	EX_asp__L_e	('NTC', 'Neutral')	NTC	Neutral
7464	EX_ala_B_e	GSMM_232	EX_cgly_e	GSMM_323	EX_asp__L_e	('NTC', 'Neutral')	NTC	Neutral
7466	EX_ala_B_e	GSMM_306	EX_cgly_e	GSMM_323	EX_asp__L_e	('NTC', 'Neutral')	NTC	Neutral
7471	EX_ala_B_e	GSMM_232	EX_glyc_e	GSMM_323	EX_asp__L_e	('NTC', 'Neutral')	NTC	Neutral
[truncated: 248,272+ more rows]

## Sheet: PMM_position_1_NA
	exudate	GSMM1	metabolite1	GSMM2	metabolite2	class	class1	class2
0	EX_4hbz_e	GSMM_005	EX_acald_e	GSMM_103	EX_diact_e	('Neutral', 'Neutral')	Neutral	Neutral
2	EX_4hbz_e	GSMM_015	EX_acald_e	GSMM_103	EX_diact_e	('Neutral', 'Neutral')	Neutral	Neutral
3	EX_4hbz_e	GSMM_016	EX_acald_e	GSMM_103	EX_diact_e	('Neutral', 'Neutral')	Neutral	Neutral
6	EX_4hbz_e	GSMM_030	EX_acald_e	GSMM_103	EX_diact_e	('Neutral', 'Neutral')	Neutral	Neutral
7	EX_4hbz_e	GSMM_036	EX_acald_e	GSMM_103	EX_diact_e	('Neutral', 'Neutral')	Neutral	Neutral
8	EX_4hbz_e	GSMM_037	EX_acald_e	GSMM_103	EX_diact_e	('Neutral', 'Neutral')	Neutral	Neutral
9	EX_4hbz_e	GSMM_047	EX_acald_e	GSMM_103	EX_diact_e	('Neutral', 'Neutral')	Neutral	Neutral
11	EX_4hbz_e	GSMM_049	EX_acald_e	GSMM_103	EX_diact_e	('Neutral', 'Neutral')	Neutral	Neutral
12	EX_4hbz_e	GSMM_051	EX_acald_e	GSMM_103	EX_diact_e	('Neutral', 'Neutral')	Neutral	Neutral
13	EX_4hbz_e	GSMM_055	EX_acald_e	GSMM_103	EX_diact_e	('Neutral', 'Neutral')	Neutral	Neutral
15	EX_4hbz_e	GSMM_063	EX_acald_e	GSMM_103	EX_diact_e	('Neutral', 'Neutral')	Neutral	Neutral
16	EX_4hbz_e	GSMM_069	EX_acald_e	GSMM_103	EX_diact_e	('Neutral', 'Neutral')	Neutral	Neutral
17	EX_4hbz_e	GSMM_076	EX_acald_e	GSMM_103	EX_diact_e	('Neutral', 'Neutral')	Neutral	Neutral
20	EX_4hbz_e	GSMM_102	EX_acald_e	GSMM_103	EX_diact_e	('Neutral', 'Neutral')	Neutral	Neutral
23	EX_4hbz_e	GSMM_119	EX_acald_e	GSMM_103	EX_diact_e	('Neutral', 'Neutral')	Neutral	Neutral
24	EX_4hbz_e	GSMM_122	EX_acald_e	GSMM_103	EX_diact_e	('Neutral', 'Neutral')	Neutral	Neutral
25	EX_4hbz_e	GSMM_127	EX_acald_e	GSMM_103	EX_diact_e	('Neutral', 'Neutral')	Neutral	Neutral
26	EX_4hbz_e	GSMM_135	EX_acald_e	GSMM_103	EX_diact_e	('Neutral', 'Neutral')	Neutral	Neutral
29	EX_4hbz_e	GSMM_157	EX_acald_e	GSMM_103	EX_diact_e	('Neutral', 'Neutral')	Neutral	Neutral
31	EX_4hbz_e	GSMM_160	EX_acald_e	GSMM_103	EX_diact_e	('Neutral', 'Neutral')	Neutral	Neutral
35	EX_4hbz_e	GSMM_186	EX_acald_e	GSMM_103	EX_diact_e	('Neutral', 'Neutral')	Neutral	Neutral
36	EX_4hbz_e	GSMM_204	EX_acald_e	GSMM_103	EX_diact_e	('Neutral', 'Neutral')	Neutral	Neutral
40	EX_4hbz_e	GSMM_230	EX_acald_e	GSMM_103	EX_diact_e	('Neutral', 'Neutral')	Neutral	Neutral
47	EX_4hbz_e	GSMM_269	EX_acald_e	GSMM_103	EX_diact_e	('Neutral', 'Neutral')	Neutral	Neutral
48	EX_4hbz_e	GSMM_277	EX_acald_e	GSMM_103	EX_diact_e	('Neutral', 'Neutral')	Neutral	Neutral
51	EX_4hbz_e	GSMM_323	EX_acald_e	GSMM_103	EX_diact_e	('Neutral', 'Neutral')	Neutral	Neutral
52	EX_4hbz_e	GSMM_343	EX_acald_e	GSMM_103	EX_diact_e	('Neutral', 'Neutral')	Neutral	Neutral
53	EX_4hbz_e	GSMM_345	EX_acald_e	GSMM_103	EX_diact_e	('Neutral', 'Neutral')	Neutral	Neutral
54	EX_4hbz_e	GSMM_351	EX_acald_e	GSMM_103	EX_diact_e	('Neutral', 'Neutral')	Neutral	Neutral
55	EX_4hbz_e	GSMM_357	EX_acald_e	GSMM_103	EX_diact_e	('Neutral', 'Neutral')	Neutral	Neutral
56	EX_4hbz_e	GSMM_364	EX_acald_e	GSMM_103	EX_diact_e	('Neutral', 'Neutral')	Neutral	Neutral
59	EX_4hbz_e	GSMM_382	EX_acald_e	GSMM_103	EX_diact_e	('Neutral', 'Neutral')	Neutral	Neutral
60	EX_4hbz_e	GSMM_392	EX_acald_e	GSMM_103	EX_diact_e	('Neutral', 'Neutral')	Neutral	Neutral
61	EX_4hbz_e	GSMM_005	EX_5drib_e	GSMM_103	EX_diact_e	('Neutral', 'Neutral')	Neutral	Neutral
63	EX_4hbz_e	GSMM_016	EX_5drib_e	GSMM_103	EX_diact_e	('Neutral', 'Neutral')	Neutral	Neutral
66	EX_4hbz_e	GSMM_036	EX_5drib_e	GSMM_103	EX_diact_e	('Neutral', 'Neutral')	Neutral	Neutral
67	EX_4hbz_e	GSMM_037	EX_5drib_e	GSMM_103	EX_diact_e	('Neutral', 'Neutral')	Neutral	Neutral
69	EX_4hbz_e	GSMM_049	EX_5drib_e	GSMM_103	EX_diact_e	('Neutral', 'Neutral')	Neutral	Neutral
70	EX_4hbz_e	GSMM_051	EX_5drib_e	GSMM_103	EX_diact_e	('Neutral', 'Neutral')	Neutral	Neutral
71	EX_4hbz_e	GSMM_055	EX_5drib_e	GSMM_103	EX_diact_e	('Neutral', 'Neutral')	Neutral	Neutral
73	EX_4hbz_e	GSMM_063	EX_5drib_e	GSMM_103	EX_diact_e	('Neutral', 'Neutral')	Neutral	Neutral
74	EX_4hbz_e	GSMM_069	EX_5drib_e	GSMM_103	EX_diact_e	('Neutral', 'Neutral')	Neutral	Neutral
75	EX_4hbz_e	GSMM_076	EX_5drib_e	GSMM_103	EX_diact_e	('Neutral', 'Neutral')	Neutral	Neutral
78	EX_4hbz_e	GSMM_102	EX_5drib_e	GSMM_103	EX_diact_e	('Neutral', 'Neutral')	Neutral	Neutral
81	EX_4hbz_e	GSMM_119	EX_5drib_e	GSMM_103	EX_diact_e	('Neutral', 'Neutral')	Neutral	Neutral
82	EX_4hbz_e	GSMM_122	EX_5drib_e	GSMM_103	EX_diact_e	('Neutral', 'Neutral')	Neutral	Neutral
83	EX_4hbz_e	GSMM_127	EX_5drib_e	GSMM_103	EX_diact_e	('Neutral', 'Neutral')	Neutral	Neutral
84	EX_4hbz_e	GSMM_135	EX_5drib_e	GSMM_103	EX_diact_e	('Neutral', 'Neutral')	Neutral	Neutral
88	EX_4hbz_e	GSMM_160	EX_5drib_e	GSMM_103	EX_diact_e	('Neutral', 'Neutral')	Neutral	Neutral
91	EX_4hbz_e	GSMM_186	EX_5drib_e	GSMM_103	EX_diact_e	('Neutral', 'Neutral')	Neutral	Neutral
92	EX_4hbz_e	GSMM_204	EX_5drib_e	GSMM_103	EX_diact_e	('Neutral', 'Neutral')	Neutral	Neutral
96	EX_4hbz_e	GSMM_230	EX_5drib_e	GSMM_103	EX_diact_e	('Neutral', 'Neutral')	Neutral	Neutral
103	EX_4hbz_e	GSMM_269	EX_5drib_e	GSMM_103	EX_diact_e	('Neutral', 'Neutral')	Neutral	Neutral
104	EX_4hbz_e	GSMM_277	EX_5drib_e	GSMM_103	EX_diact_e	('Neutral', 'Neutral')	Neutral	Neutral
107	EX_4hbz_e	GSMM_316	EX_5drib_e	GSMM_103	EX_diact_e	('Neutral', 'Neutral')	Neutral	Neutral
108	EX_4hbz_e	GSMM_323	EX_5drib_e	GSMM_103	EX_diact_e	('Neutral', 'Neutral')	Neutral	Neutral
109	EX_4hbz_e	GSMM_344	EX_5drib_e	GSMM_103	EX_diact_e	('Neutral', 'Neutral')	Neutral	Neutral
110	EX_4hbz_e	GSMM_345	EX_5drib_e	GSMM_103	EX_diact_e	('Neutral', 'Neutral')	Neutral	Neutral
111	EX_4hbz_e	GSMM_351	EX_5drib_e	GSMM_103	EX_diact_e	('Neutral', 'Neutral')	Neutral	Neutral
113	EX_4hbz_e	GSMM_357	EX_5drib_e	GSMM_103	EX_diact_e	('Neutral', 'Neutral')	Neutral	Neutral
114	EX_4hbz_e	GSMM_358	EX_5drib_e	GSMM_103	EX_diact_e	('Neutral', 'Neutral')	Neutral	Neutral
115	EX_4hbz_e	GSMM_364	EX_5drib_e	GSMM_103	EX_diact_e	('Neutral', 'Neutral')	Neutral	Neutral
118	EX_4hbz_e	GSMM_382	EX_5drib_e	GSMM_103	EX_diact_e	('Neutral', 'Neutral')	Neutral	Neutral
119	EX_4hbz_e	GSMM_392	EX_5drib_e	GSMM_103	EX_diact_e	('Neutral', 'Neutral')	Neutral	Neutral
120	EX_4hbz_e	GSMM_005	EX_for_e	GSMM_103	EX_diact_e	('Neutral', 'Neutral')	Neutral	Neutral
121	EX_4hbz_e	GSMM_036	EX_for_e	GSMM_103	EX_diact_e	('Neutral', 'Neutral')	Neutral	Neutral
122	EX_4hbz_e	GSMM_047	EX_for_e	GSMM_103	EX_diact_e	('Neutral', 'Neutral')	Neutral	Neutral
124	EX_4hbz_e	GSMM_049	EX_for_e	GSMM_103	EX_diact_e	('Neutral', 'Neutral')	Neutral	Neutral
125	EX_4hbz_e	GSMM_051	EX_for_e	GSMM_103	EX_diact_e	('Neutral', 'Neutral')	Neutral	Neutral
126	EX_4hbz_e	GSMM_069	EX_for_e	GSMM_103	EX_diact_e	('Neutral', 'Neutral')	Neutral	Neutral
127	EX_4hbz_e	GSMM_076	EX_for_e	GSMM_103	EX_diact_e	('Neutral', 'Neutral')	Neutral	Neutral
128	EX_4hbz_e	GSMM_102	EX_for_e	GSMM_103	EX_diact_e	('Neutral', 'Neutral')	Neutral	Neutral
130	EX_4hbz_e	GSMM_127	EX_for_e	GSMM_103	EX_diact_e	('Neutral', 'Neutral')	Neutral	Neutral
132	EX_4hbz_e	GSMM_160	EX_for_e	GSMM_103	EX_diact_e	('Neutral', 'Neutral')	Neutral	Neutral
134	EX_4hbz_e	GSMM_186	EX_for_e	GSMM_103	EX_diact_e	('Neutral', 'Neutral')	Neutral	Neutral
138	EX_4hbz_e	GSMM_344	EX_for_e	GSMM_103	EX_diact_e	('Neutral', 'Neutral')	Neutral	Neutral
139	EX_4hbz_e	GSMM_357	EX_for_e	GSMM_103	EX_diact_e	('Neutral', 'Neutral')	Neutral	Neutral
140	EX_4hbz_e	GSMM_364	EX_for_e	GSMM_103	EX_diact_e	('Neutral', 'Neutral')	Neutral	Neutral
143	EX_4hbz_e	GSMM_382	EX_for_e	GSMM_103	EX_diact_e	('Neutral', 'Neutral')	Neutral	Neutral
144	EX_4hbz_e	GSMM_005	EX_etoh_e	GSMM_103	EX_diact_e	('Neutral', 'Neutral')	Neutral	Neutral
147	EX_4hbz_e	GSMM_015	EX_etoh_e	GSMM_103	EX_diact_e	('Neutral', 'Neutral')	Neutral	Neutral
148	EX_4hbz_e	GSMM_016	EX_etoh_e	GSMM_103	EX_diact_e	('Neutral', 'Neutral')	Neutral	Neutral
151	EX_4hbz_e	GSMM_030	EX_etoh_e	GSMM_103	EX_diact_e	('Neutral', 'Neutral')	Neutral	Neutral
152	EX_4hbz_e	GSMM_036	EX_etoh_e	GSMM_103	EX_diact_e	('Neutral', 'Neutral')	Neutral	Neutral
153	EX_4hbz_e	GSMM_037	EX_etoh_e	GSMM_103	EX_diact_e	('Neutral', 'Neutral')	Neutral	Neutral
154	EX_4hbz_e	GSMM_047	EX_etoh_e	GSMM_103	EX_diact_e	('Neutral', 'Neutral')	Neutral	Neutral
156	EX_4hbz_e	GSMM_049	EX_etoh_e	GSMM_103	EX_diact_e	('Neutral', 'Neutral')	Neutral	Neutral
157	EX_4hbz_e	GSMM_051	EX_etoh_e	GSMM_103	EX_diact_e	('Neutral', 'Neutral')	Neutral	Neutral
158	EX_4hbz_e	GSMM_055	EX_etoh_e	GSMM_103	EX_diact_e	('Neutral', 'Neutral')	Neutral	Neutral
160	EX_4hbz_e	GSMM_069	EX_etoh_e	GSMM_103	EX_diact_e	('Neutral', 'Neutral')	Neutral	Neutral
161	EX_4hbz_e	GSMM_076	EX_etoh_e	GSMM_103	EX_diact_e	('Neutral', 'Neutral')	Neutral	Neutral
163	EX_4hbz_e	GSMM_102	EX_etoh_e	GSMM_103	EX_diact_e	('Neutral', 'Neutral')	Neutral	Neutral
166	EX_4hbz_e	GSMM_119	EX_etoh_e	GSMM_103	EX_diact_e	('Neutral', 'Neutral')	Neutral	Neutral
167	EX_4hbz_e	GSMM_122	EX_etoh_e	GSMM_103	EX_diact_e	('Neutral', 'Neutral')	Neutral	Neutral
168	EX_4hbz_e	GSMM_127	EX_etoh_e	GSMM_103	EX_diact_e	('Neutral', 'Neutral')	Neutral	Neutral
169	EX_4hbz_e	GSMM_135	EX_etoh_e	GSMM_103	EX_diact_e	('Neutral', 'Neutral')	Neutral	Neutral
171	EX_4hbz_e	GSMM_157	EX_etoh_e	GSMM_103	EX_diact_e	('Neutral', 'Neutral')	Neutral	Neutral
176	EX_4hbz_e	GSMM_186	EX_etoh_e	GSMM_103	EX_diact_e	('Neutral', 'Neutral')	Neutral	Neutral
177	EX_4hbz_e	GSMM_204	EX_etoh_e	GSMM_103	EX_diact_e	('Neutral', 'Neutral')	Neutral	Neutral
181	EX_4hbz_e	GSMM_230	EX_etoh_e	GSMM_103	EX_diact_e	('Neutral', 'Neutral')	Neutral	Neutral
188	EX_4hbz_e	GSMM_269	EX_etoh_e	GSMM_103	EX_diact_e	('Neutral', 'Neutral')	Neutral	Neutral
190	EX_4hbz_e	GSMM_316	EX_etoh_e	GSMM_103	EX_diact_e	('Neutral', 'Neutral')	Neutral	Neutral
191	EX_4hbz_e	GSMM_323	EX_etoh_e	GSMM_103	EX_diact_e	('Neutral', 'Neutral')	Neutral	Neutral
192	EX_4hbz_e	GSMM_343	EX_etoh_e	GSMM_103	EX_diact_e	('Neutral', 'Neutral')	Neutral	Neutral
193	EX_4hbz_e	GSMM_344	EX_etoh_e	GSMM_103	EX_diact_e	('Neutral', 'Neutral')	Neutral	Neutral
194	EX_4hbz_e	GSMM_345	EX_etoh_e	GSMM_103	EX_diact_e	('Neutral', 'Neutral')	Neutral	Neutral
195	EX_4hbz_e	GSMM_351	EX_etoh_e	GSMM_103	EX_diact_e	('Neutral', 'Neutral')	Neutral	Neutral
197	EX_4hbz_e	GSMM_357	EX_etoh_e	GSMM_103	EX_diact_e	('Neutral', 'Neutral')	Neutral	Neutral
198	EX_4hbz_e	GSMM_358	EX_etoh_e	GSMM_103	EX_diact_e	('Neutral', 'Neutral')	Neutral	Neutral
199	EX_4hbz_e	GSMM_364	EX_etoh_e	GSMM_103	EX_diact_e	('Neutral', 'Neutral')	Neutral	Neutral
202	EX_4hbz_e	GSMM_382	EX_etoh_e	GSMM_103	EX_diact_e	('Neutral', 'Neutral')	Neutral	Neutral
203	EX_4hbz_e	GSMM_392	EX_etoh_e	GSMM_103	EX_diact_e	('Neutral', 'Neutral')	Neutral	Neutral
204	EX_4hbz_e	GSMM_005	EX_glyc3p_e	GSMM_103	EX_diact_e	('Neutral', 'Neutral')	Neutral	Neutral
207	EX_4hbz_e	GSMM_015	EX_glyc3p_e	GSMM_103	EX_diact_e	('Neutral', 'Neutral')	Neutral	Neutral
209	EX_4hbz_e	GSMM_030	EX_glyc3p_e	GSMM_103	EX_diact_e	('Neutral', 'Neutral')	Neutral	Neutral
210	EX_4hbz_e	GSMM_049	EX_glyc3p_e	GSMM_103	EX_diact_e	('Neutral', 'Neutral')	Neutral	Neutral
211	EX_4hbz_e	GSMM_055	EX_glyc3p_e	GSMM_103	EX_diact_e	('Neutral', 'Neutral')	Neutral	Neutral
214	EX_4hbz_e	GSMM_119	EX_glyc3p_e	GSMM_103	EX_diact_e	('Neutral', 'Neutral')	Neutral	Neutral
215	EX_4hbz_e	GSMM_127	EX_glyc3p_e	GSMM_103	EX_diact_e	('Neutral', 'Neutral')	Neutral	Neutral
218	EX_4hbz_e	GSMM_157	EX_glyc3p_e	GSMM_103	EX_diact_e	('Neutral', 'Neutral')	Neutral	Neutral
220	EX_4hbz_e	GSMM_186	EX_glyc3p_e	GSMM_103	EX_diact_e	('Neutral', 'Neutral')	Neutral	Neutral
224	EX_4hbz_e	GSMM_230	EX_glyc3p_e	GSMM_103	EX_diact_e	('Neutral', 'Neutral')	Neutral	Neutral
229	EX_4hbz_e	GSMM_277	EX_glyc3p_e	GSMM_103	EX_diact_e	('Neutral', 'Neutral')	Neutral	Neutral
231	EX_4hbz_e	GSMM_316	EX_glyc3p_e	GSMM_103	EX_diact_e	('Neutral', 'Neutral')	Neutral	Neutral
232	EX_4hbz_e	GSMM_343	EX_glyc3p_e	GSMM_103	EX_diact_e	('Neutral', 'Neutral')	Neutral	Neutral
233	EX_4hbz_e	GSMM_345	EX_glyc3p_e	GSMM_103	EX_diact_e	('Neutral', 'Neutral')	Neutral	Neutral
235	EX_4hbz_e	GSMM_364	EX_glyc3p_e	GSMM_103	EX_diact_e	('Neutral', 'Neutral')	Neutral	Neutral
237	EX_4hbz_e	GSMM_005	EX_istfrnA_e	GSMM_103	EX_diact_e	('Neutral', 'Neutral')	Neutral	Neutral
238	EX_4hbz_e	GSMM_016	EX_istfrnA_e	GSMM_103	EX_diact_e	('Neutral', 'Neutral')	Neutral	Neutral
241	EX_4hbz_e	GSMM_049	EX_istfrnA_e	GSMM_103	EX_diact_e	('Neutral', 'Neutral')	Neutral	Neutral
242	EX_4hbz_e	GSMM_051	EX_istfrnA_e	GSMM_103	EX_diact_e	('Neutral', 'Neutral')	Neutral	Neutral
243	EX_4hbz_e	GSMM_055	EX_istfrnA_e	GSMM_103	EX_diact_e	('Neutral', 'Neutral')	Neutral	Neutral
246	EX_4hbz_e	GSMM_122	EX_istfrnA_e	GSMM_103	EX_diact_e	('Neutral', 'Neutral')	Neutral	Neutral
247	EX_4hbz_e	GSMM_135	EX_istfrnA_e	GSMM_103	EX_diact_e	('Neutral', 'Neutral')	Neutral	Neutral
249	EX_4hbz_e	GSMM_157	EX_istfrnA_e	GSMM_103	EX_diact_e	('Neutral', 'Neutral')	Neutral	Neutral
252	EX_4hbz_e	GSMM_186	EX_istfrnA_e	GSMM_103	EX_diact_e	('Neutral', 'Neutral')	Neutral	Neutral
253	EX_4hbz_e	GSMM_204	EX_istfrnA_e	GSMM_103	EX_diact_e	('Neutral', 'Neutral')	Neutral	Neutral
257	EX_4hbz_e	GSMM_277	EX_istfrnA_e	GSMM_103	EX_diact_e	('Neutral', 'Neutral')	Neutral	Neutral
258	EX_4hbz_e	GSMM_345	EX_istfrnA_e	GSMM_103	EX_diact_e	('Neutral', 'Neutral')	Neutral	Neutral
259	EX_4hbz_e	GSMM_351	EX_istfrnA_e	GSMM_103	EX_diact_e	('Neutral', 'Neutral')	Neutral	Neutral
261	EX_4hbz_e	GSMM_358	EX_istfrnA_e	GSMM_103	EX_diact_e	('Neutral', 'Neutral')	Neutral	Neutral
263	EX_4hbz_e	GSMM_382	EX_istfrnA_e	GSMM_103	EX_diact_e	('Neutral', 'Neutral')	Neutral	Neutral
264	EX_4hbz_e	GSMM_005	EX_fald_e	GSMM_103	EX_diact_e	('Neutral', 'Neutral')	Neutral	Neutral
267	EX_4hbz_e	GSMM_015	EX_fald_e	GSMM_103	EX_diact_e	('Neutral', 'Neutral')	Neutral	Neutral
268	EX_4hbz_e	GSMM_016	EX_fald_e	GSMM_103	EX_diact_e	('Neutral', 'Neutral')	Neutral	Neutral
271	EX_4hbz_e	GSMM_030	EX_fald_e	GSMM_103	EX_diact_e	('Neutral', 'Neutral')	Neutral	Neutral
272	EX_4hbz_e	GSMM_036	EX_fald_e	GSMM_103	EX_diact_e	('Neutral', 'Neutral')	Neutral	Neutral
273	EX_4hbz_e	GSMM_037	EX_fald_e	GSMM_103	EX_diact_e	('Neutral', 'Neutral')	Neutral	Neutral
274	EX_4hbz_e	GSMM_047	EX_fald_e	GSMM_103	EX_diact_e	('Neutral', 'Neutral')	Neutral	Neutral
276	EX_4hbz_e	GSMM_049	EX_fald_e	GSMM_103	EX_diact_e	('Neutral', 'Neutral')	Neutral	Neutral
277	EX_4hbz_e	GSMM_051	EX_fald_e	GSMM_103	EX_diact_e	('Neutral', 'Neutral')	Neutral	Neutral
278	EX_4hbz_e	GSMM_055	EX_fald_e	GSMM_103	EX_diact_e	('Neutral', 'Neutral')	Neutral	Neutral
280	EX_4hbz_e	GSMM_063	EX_fald_e	GSMM_103	EX_diact_e	('Neutral', 'Neutral')	Neutral	Neutral
281	EX_4hbz_e	GSMM_069	EX_fald_e	GSMM_103	EX_diact_e	('Neutral', 'Neutral')	Neutral	Neutral
282	EX_4hbz_e	GSMM_076	EX_fald_e	GSMM_103	EX_diact_e	('Neutral', 'Neutral')	Neutral	Neutral
285	EX_4hbz_e	GSMM_102	EX_fald_e	GSMM_103	EX_diact_e	('Neutral', 'Neutral')	Neutral	Neutral
287	EX_4hbz_e	GSMM_119	EX_fald_e	GSMM_103	EX_diact_e	('Neutral', 'Neutral')	Neutral	Neutral
288	EX_4hbz_e	GSMM_122	EX_fald_e	GSMM_103	EX_diact_e	('Neutral', 'Neutral')	Neutral	Neutral
289	EX_4hbz_e	GSMM_127	EX_fald_e	GSMM_103	EX_diact_e	('Neutral', 'Neutral')	Neutral	Neutral
290	EX_4hbz_e	GSMM_135	EX_fald_e	GSMM_103	EX_diact_e	('Neutral', 'Neutral')	Neutral	Neutral
292	EX_4hbz_e	GSMM_157	EX_fald_e	GSMM_103	EX_diact_e	('Neutral', 'Neutral')	Neutral	Neutral
298	EX_4hbz_e	GSMM_186	EX_fald_e	GSMM_103	EX_diact_e	('Neutral', 'Neutral')	Neutral	Neutral
299	EX_4hbz_e	GSMM_204	EX_fald_e	GSMM_103	EX_diact_e	('Neutral', 'Neutral')	Neutral	Neutral
303	EX_4hbz_e	GSMM_230	EX_fald_e	GSMM_103	EX_diact_e	('Neutral', 'Neutral')	Neutral	Neutral
310	EX_4hbz_e	GSMM_269	EX_fald_e	GSMM_103	EX_diact_e	('Neutral', 'Neutral')	Neutral	Neutral
311	EX_4hbz_e	GSMM_277	EX_fald_e	GSMM_103	EX_diact_e	('Neutral', 'Neutral')	Neutral	Neutral
315	EX_4hbz_e	GSMM_316	EX_fald_e	GSMM_103	EX_diact_e	('Neutral', 'Neutral')	Neutral	Neutral
316	EX_4hbz_e	GSMM_323	EX_fald_e	GSMM_103	EX_diact_e	('Neutral', 'Neutral')	Neutral	Neutral
317	EX_4hbz_e	GSMM_343	EX_fald_e	GSMM_103	EX_diact_e	('Neutral', 'Neutral')	Neutral	Neutral
318	EX_4hbz_e	GSMM_344	EX_fald_e	GSMM_103	EX_diact_e	('Neutral', 'Neutral')	Neutral	Neutral
319	EX_4hbz_e	GSMM_345	EX_fald_e	GSMM_103	EX_diact_e	('Neutral', 'Neutral')	Neutral	Neutral
320	EX_4hbz_e	GSMM_351	EX_fald_e	GSMM_103	EX_diact_e	('Neutral', 'Neutral')	Neutral	Neutral
322	EX_4hbz_e	GSMM_357	EX_fald_e	GSMM_103	EX_diact_e	('Neutral', 'Neutral')	Neutral	Neutral
323	EX_4hbz_e	GSMM_358	EX_fald_e	GSMM_103	EX_diact_e	('Neutral', 'Neutral')	Neutral	Neutral
324	EX_4hbz_e	GSMM_364	EX_fald_e	GSMM_103	EX_diact_e	('Neutral', 'Neutral')	Neutral	Neutral
327	EX_4hbz_e	GSMM_382	EX_fald_e	GSMM_103	EX_diact_e	('Neutral', 'Neutral')	Neutral	Neutral
328	EX_4hbz_e	GSMM_392	EX_fald_e	GSMM_103	EX_diact_e	('Neutral', 'Neutral')	Neutral	Neutral
329	EX_4hbz_e	GSMM_005	EX_ptrc_e	GSMM_103	EX_diact_e	('Neutral', 'Neutral')	Neutral	Neutral
331	EX_4hbz_e	GSMM_016	EX_ptrc_e	GSMM_103	EX_diact_e	('Neutral', 'Neutral')	Neutral	Neutral
333	EX_4hbz_e	GSMM_030	EX_ptrc_e	GSMM_103	EX_diact_e	('Neutral', 'Neutral')	Neutral	Neutral
334	EX_4hbz_e	GSMM_037	EX_ptrc_e	GSMM_103	EX_diact_e	('Neutral', 'Neutral')	Neutral	Neutral
335	EX_4hbz_e	GSMM_047	EX_ptrc_e	GSMM_103	EX_diact_e	('Neutral', 'Neutral')	Neutral	Neutral
337	EX_4hbz_e	GSMM_049	EX_ptrc_e	GSMM_103	EX_diact_e	('Neutral', 'Neutral')	Neutral	Neutral
338	EX_4hbz_e	GSMM_051	EX_ptrc_e	GSMM_103	EX_diact_e	('Neutral', 'Neutral')	Neutral	Neutral
339	EX_4hbz_e	GSMM_055	EX_ptrc_e	GSMM_103	EX_diact_e	('Neutral', 'Neutral')	Neutral	Neutral
341	EX_4hbz_e	GSMM_069	EX_ptrc_e	GSMM_103	EX_diact_e	('Neutral', 'Neutral')	Neutral	Neutral
342	EX_4hbz_e	GSMM_076	EX_ptrc_e	GSMM_103	EX_diact_e	('Neutral', 'Neutral')	Neutral	Neutral
343	EX_4hbz_e	GSMM_102	EX_ptrc_e	GSMM_103	EX_diact_e	('Neutral', 'Neutral')	Neutral	Neutral
345	EX_4hbz_e	GSMM_119	EX_ptrc_e	GSMM_103	EX_diact_e	('Neutral', 'Neutral')	Neutral	Neutral
346	EX_4hbz_e	GSMM_122	EX_ptrc_e	GSMM_103	EX_diact_e	('Neutral', 'Neutral')	Neutral	Neutral
349	EX_4hbz_e	GSMM_157	EX_ptrc_e	GSMM_103	EX_diact_e	('Neutral', 'Neutral')	Neutral	Neutral
354	EX_4hbz_e	GSMM_186	EX_ptrc_e	GSMM_103	EX_diact_e	('Neutral', 'Neutral')	Neutral	Neutral
355	EX_4hbz_e	GSMM_204	EX_ptrc_e	GSMM_103	EX_diact_e	('Neutral', 'Neutral')	Neutral	Neutral
359	EX_4hbz_e	GSMM_230	EX_ptrc_e	GSMM_103	EX_diact_e	('Neutral', 'Neutral')	Neutral	Neutral
364	EX_4hbz_e	GSMM_277	EX_ptrc_e	GSMM_103	EX_diact_e	('Neutral', 'Neutral')	Neutral	Neutral
367	EX_4hbz_e	GSMM_316	EX_ptrc_e	GSMM_103	EX_diact_e	('Neutral', 'Neutral')	Neutral	Neutral
368	EX_4hbz_e	GSMM_323	EX_ptrc_e	GSMM_103	EX_diact_e	('Neutral', 'Neutral')	Neutral	Neutral
369	EX_4hbz_e	GSMM_343	EX_ptrc_e	GSMM_103	EX_diact_e	('Neutral', 'Neutral')	Neutral	Neutral
370	EX_4hbz_e	GSMM_344	EX_ptrc_e	GSMM_103	EX_diact_e	('Neutral', 'Neutral')	Neutral	Neutral
371	EX_4hbz_e	GSMM_345	EX_ptrc_e	GSMM_103	EX_diact_e	('Neutral', 'Neutral')	Neutral	Neutral
373	EX_4hbz_e	GSMM_358	EX_ptrc_e	GSMM_103	EX_diact_e	('Neutral', 'Neutral')	Neutral	Neutral
374	EX_4hbz_e	GSMM_364	EX_ptrc_e	GSMM_103	EX_diact_e	('Neutral', 'Neutral')	Neutral	Neutral
377	EX_4hbz_e	GSMM_382	EX_ptrc_e	GSMM_103	EX_diact_e	('Neutral', 'Neutral')	Neutral	Neutral
378	EX_4hbz_e	GSMM_005	EX_rib__D_e	GSMM_103	EX_diact_e	('Neutral', 'Neutral')	Neutral	Neutral
381	EX_4hbz_e	GSMM_016	EX_rib__D_e	GSMM_103	EX_diact_e	('Neutral', 'Neutral')	Neutral	Neutral
383	EX_4hbz_e	GSMM_030	EX_rib__D_e	GSMM_103	EX_diact_e	('Neutral', 'Neutral')	Neutral	Neutral
384	EX_4hbz_e	GSMM_036	EX_rib__D_e	GSMM_103	EX_diact_e	('Neutral', 'Neutral')	Neutral	Neutral
385	EX_4hbz_e	GSMM_037	EX_rib__D_e	GSMM_103	EX_diact_e	('Neutral', 'Neutral')	Neutral	Neutral
387	EX_4hbz_e	GSMM_049	EX_rib__D_e	GSMM_103	EX_diact_e	('Neutral', 'Neutral')	Neutral	Neutral
388	EX_4hbz_e	GSMM_055	EX_rib__D_e	GSMM_103	EX_diact_e	('Neutral', 'Neutral')	Neutral	Neutral
390	EX_4hbz_e	GSMM_069	EX_rib__D_e	GSMM_103	EX_diact_e	('Neutral', 'Neutral')	Neutral	Neutral
393	EX_4hbz_e	GSMM_102	EX_rib__D_e	GSMM_103	EX_diact_e	('Neutral', 'Neutral')	Neutral	Neutral
395	EX_4hbz_e	GSMM_119	EX_rib__D_e	GSMM_103	EX_diact_e	('Neutral', 'Neutral')	Neutral	Neutral
396	EX_4hbz_e	GSMM_122	EX_rib__D_e	GSMM_103	EX_diact_e	('Neutral', 'Neutral')	Neutral	Neutral
397	EX_4hbz_e	GSMM_127	EX_rib__D_e	GSMM_103	EX_diact_e	('Neutral', 'Neutral')	Neutral	Neutral
399	EX_4hbz_e	GSMM_160	EX_rib__D_e	GSMM_103	EX_diact_e	('Neutral', 'Neutral')	Neutral	Neutral
402	EX_4hbz_e	GSMM_186	EX_rib__D_e	GSMM_103	EX_diact_e	('Neutral', 'Neutral')	Neutral	Neutral
403	EX_4hbz_e	GSMM_204	EX_rib__D_e	GSMM_103	EX_diact_e	('Neutral', 'Neutral')	Neutral	Neutral
407	EX_4hbz_e	GSMM_230	EX_rib__D_e	GSMM_103	EX_diact_e	('Neutral', 'Neutral')	Neutral	Neutral
412	EX_4hbz_e	GSMM_277	EX_rib__D_e	GSMM_103	EX_diact_e	('Neutral', 'Neutral')	Neutral	Neutral
416	EX_4hbz_e	GSMM_316	EX_rib__D_e	GSMM_103	EX_diact_e	('Neutral', 'Neutral')	Neutral	Neutral
417	EX_4hbz_e	GSMM_323	EX_rib__D_e	GSMM_103	EX_diact_e	('Neutral', 'Neutral')	Neutral	Neutral
418	EX_4hbz_e	GSMM_343	EX_rib__D_e	GSMM_103	EX_diact_e	('Neutral', 'Neutral')	Neutral	Neutral
419	EX_4hbz_e	GSMM_344	EX_rib__D_e	GSMM_103	EX_diact_e	('Neutral', 'Neutral')	Neutral	Neutral
420	EX_4hbz_e	GSMM_345	EX_rib__D_e	GSMM_103	EX_diact_e	('Neutral', 'Neutral')	Neutral	Neutral
421	EX_4hbz_e	GSMM_351	EX_rib__D_e	GSMM_103	EX_diact_e	('Neutral', 'Neutral')	Neutral	Neutral
423	EX_4hbz_e	GSMM_357	EX_rib__D_e	GSMM_103	EX_diact_e	('Neutral', 'Neutral')	Neutral	Neutral
424	EX_4hbz_e	GSMM_358	EX_rib__D_e	GSMM_103	EX_diact_e	('Neutral', 'Neutral')	Neutral	Neutral
425	EX_4hbz_e	GSMM_364	EX_rib__D_e	GSMM_103	EX_diact_e	('Neutral', 'Neutral')	Neutral	Neutral
428	EX_4hbz_e	GSMM_392	EX_rib__D_e	GSMM_103	EX_diact_e	('Neutral', 'Neutral')	Neutral	Neutral
429	EX_4hbz_e	GSMM_005	EX_actn__R_e	GSMM_103	EX_diact_e	('Neutral', 'Neutral')	Neutral	Neutral
432	EX_4hbz_e	GSMM_036	EX_actn__R_e	GSMM_103	EX_diact_e	('Neutral', 'Neutral')	Neutral	Neutral
433	EX_4hbz_e	GSMM_037	EX_actn__R_e	GSMM_103	EX_diact_e	('Neutral', 'Neutral')	Neutral	Neutral
434	EX_4hbz_e	GSMM_049	EX_actn__R_e	GSMM_103	EX_diact_e	('Neutral', 'Neutral')	Neutral	Neutral
435	EX_4hbz_e	GSMM_063	EX_actn__R_e	GSMM_103	EX_diact_e	('Neutral', 'Neutral')	Neutral	Neutral
436	EX_4hbz_e	GSMM_069	EX_actn__R_e	GSMM_103	EX_diact_e	('Neutral', 'Neutral')	Neutral	Neutral
437	EX_4hbz_e	GSMM_076	EX_actn__R_e	GSMM_103	EX_diact_e	('Neutral', 'Neutral')	Neutral	Neutral
441	EX_4hbz_e	GSMM_119	EX_actn__R_e	GSMM_103	EX_diact_e	('Neutral', 'Neutral')	Neutral	Neutral
445	EX_4hbz_e	GSMM_204	EX_actn__R_e	GSMM_103	EX_diact_e	('Neutral', 'Neutral')	Neutral	Neutral
448	EX_4hbz_e	GSMM_323	EX_actn__R_e	GSMM_103	EX_diact_e	('Neutral', 'Neutral')	Neutral	Neutral
449	EX_4hbz_e	GSMM_343	EX_actn__R_e	GSMM_103	EX_diact_e	('Neutral', 'Neutral')	Neutral	Neutral
450	EX_4hbz_e	GSMM_344	EX_actn__R_e	GSMM_103	EX_diact_e	('Neutral', 'Neutral')	Neutral	Neutral
451	EX_4hbz_e	GSMM_345	EX_actn__R_e	GSMM_103	EX_diact_e	('Neutral', 'Neutral')	Neutral	Neutral
453	EX_4hbz_e	GSMM_358	EX_actn__R_e	GSMM_103	EX_diact_e	('Neutral', 'Neutral')	Neutral	Neutral
456	EX_4hbz_e	GSMM_392	EX_actn__R_e	GSMM_103	EX_diact_e	('Neutral', 'Neutral')	Neutral	Neutral
457	EX_4hbz_e	GSMM_005	EX_spmd_e	GSMM_103	EX_diact_e	('Neutral', 'Neutral')	Neutral	Neutral
459	EX_4hbz_e	GSMM_015	EX_spmd_e	GSMM_103	EX_diact_e	('Neutral', 'Neutral')	Neutral	Neutral
460	EX_4hbz_e	GSMM_016	EX_spmd_e	GSMM_103	EX_diact_e	('Neutral', 'Neutral')	Neutral	Neutral
463	EX_4hbz_e	GSMM_036	EX_spmd_e	GSMM_103	EX_diact_e	('Neutral', 'Neutral')	Neutral	Neutral
464	EX_4hbz_e	GSMM_037	EX_spmd_e	GSMM_103	EX_diact_e	('Neutral', 'Neutral')	Neutral	Neutral
466	EX_4hbz_e	GSMM_049	EX_spmd_e	GSMM_103	EX_diact_e	('Neutral', 'Neutral')	Neutral	Neutral
467	EX_4hbz_e	GSMM_051	EX_spmd_e	GSMM_103	EX_diact_e	('Neutral', 'Neutral')	Neutral	Neutral
468	EX_4hbz_e	GSMM_055	EX_spmd_e	GSMM_103	EX_diact_e	('Neutral', 'Neutral')	Neutral	Neutral
469	EX_4hbz_e	GSMM_063	EX_spmd_e	GSMM_103	EX_diact_e	('Neutral', 'Neutral')	Neutral	Neutral
470	EX_4hbz_e	GSMM_069	EX_spmd_e	GSMM_103	EX_diact_e	('Neutral', 'Neutral')	Neutral	Neutral
471	EX_4hbz_e	GSMM_076	EX_spmd_e	GSMM_103	EX_diact_e	('Neutral', 'Neutral')	Neutral	Neutral
473	EX_4hbz_e	GSMM_102	EX_spmd_e	GSMM_103	EX_diact_e	('Neutral', 'Neutral')	Neutral	Neutral
476	EX_4hbz_e	GSMM_122	EX_spmd_e	GSMM_103	EX_diact_e	('Neutral', 'Neutral')	Neutral	Neutral
477	EX_4hbz_e	GSMM_127	EX_spmd_e	GSMM_103	EX_diact_e	('Neutral', 'Neutral')	Neutral	Neutral
478	EX_4hbz_e	GSMM_135	EX_spmd_e	GSMM_103	EX_diact_e	('Neutral', 'Neutral')	Neutral	Neutral
480	EX_4hbz_e	GSMM_157	EX_spmd_e	GSMM_103	EX_diact_e	('Neutral', 'Neutral')	Neutral	Neutral
482	EX_4hbz_e	GSMM_160	EX_spmd_e	GSMM_103	EX_diact_e	('Neutral', 'Neutral')	Neutral	Neutral
486	EX_4hbz_e	GSMM_186	EX_spmd_e	GSMM_103	EX_diact_e	('Neutral', 'Neutral')	Neutral	Neutral
490	EX_4hbz_e	GSMM_230	EX_spmd_e	GSMM_103	EX_diact_e	('Neutral', 'Neutral')	Neutral	Neutral
495	EX_4hbz_e	GSMM_277	EX_spmd_e	GSMM_103	EX_diact_e	('Neutral', 'Neutral')	Neutral	Neutral
497	EX_4hbz_e	GSMM_316	EX_spmd_e	GSMM_103	EX_diact_e	('Neutral', 'Neutral')	Neutral	Neutral
498	EX_4hbz_e	GSMM_323	EX_spmd_e	GSMM_103	EX_diact_e	('Neutral', 'Neutral')	Neutral	Neutral
499	EX_4hbz_e	GSMM_344	EX_spmd_e	GSMM_103	EX_diact_e	('Neutral', 'Neutral')	Neutral	Neutral
501	EX_4hbz_e	GSMM_358	EX_spmd_e	GSMM_103	EX_diact_e	('Neutral', 'Neutral')	Neutral	Neutral
504	EX_4hbz_e	GSMM_382	EX_spmd_e	GSMM_103	EX_diact_e	('Neutral', 'Neutral')	Neutral	Neutral
505	EX_4hbz_e	GSMM_392	EX_spmd_e	GSMM_103	EX_diact_e	('Neutral', 'Neutral')	Neutral	Neutral
506	EX_4hbz_e	GSMM_005	EX_glyc_e	GSMM_103	EX_diact_e	('Neutral', 'Neutral')	Neutral	Neutral
509	EX_4hbz_e	GSMM_015	EX_glyc_e	GSMM_103	EX_diact_e	('Neutral', 'Neutral')	Neutral	Neutral
510	EX_4hbz_e	GSMM_016	EX_glyc_e	GSMM_103	EX_diact_e	('Neutral', 'Neutral')	Neutral	Neutral
513	EX_4hbz_e	GSMM_030	EX_glyc_e	GSMM_103	EX_diact_e	('Neutral', 'Neutral')	Neutral	Neutral
514	EX_4hbz_e	GSMM_036	EX_glyc_e	GSMM_103	EX_diact_e	('Neutral', 'Neutral')	Neutral	Neutral
515	EX_4hbz_e	GSMM_037	EX_glyc_e	GSMM_103	EX_diact_e	('Neutral', 'Neutral')	Neutral	Neutral
516	EX_4hbz_e	GSMM_047	EX_glyc_e	GSMM_103	EX_diact_e	('Neutral', 'Neutral')	Neutral	Neutral
518	EX_4hbz_e	GSMM_049	EX_glyc_e	GSMM_103	EX_diact_e	('Neutral', 'Neutral')	Neutral	Neutral
519	EX_4hbz_e	GSMM_051	EX_glyc_e	GSMM_103	EX_diact_e	('Neutral', 'Neutral')	Neutral	Neutral
520	EX_4hbz_e	GSMM_055	EX_glyc_e	GSMM_103	EX_diact_e	('Neutral', 'Neutral')	Neutral	Neutral
522	EX_4hbz_e	GSMM_063	EX_glyc_e	GSMM_103	EX_diact_e	('Neutral', 'Neutral')	Neutral	Neutral
523	EX_4hbz_e	GSMM_069	EX_glyc_e	GSMM_103	EX_diact_e	('Neutral', 'Neutral')	Neutral	Neutral
526	EX_4hbz_e	GSMM_102	EX_glyc_e	GSMM_103	EX_diact_e	('Neutral', 'Neutral')	Neutral	Neutral
529	EX_4hbz_e	GSMM_119	EX_glyc_e	GSMM_103	EX_diact_e	('Neutral', 'Neutral')	Neutral	Neutral
530	EX_4hbz_e	GSMM_122	EX_glyc_e	GSMM_103	EX_diact_e	('Neutral', 'Neutral')	Neutral	Neutral
531	EX_4hbz_e	GSMM_127	EX_glyc_e	GSMM_103	EX_diact_e	('Neutral', 'Neutral')	Neutral	Neutral
532	EX_4hbz_e	GSMM_135	EX_glyc_e	GSMM_103	EX_diact_e	('Neutral', 'Neutral')	Neutral	Neutral
534	EX_4hbz_e	GSMM_157	EX_glyc_e	GSMM_103	EX_diact_e	('Neutral', 'Neutral')	Neutral	Neutral
536	EX_4hbz_e	GSMM_160	EX_glyc_e	GSMM_103	EX_diact_e	('Neutral', 'Neutral')	Neutral	Neutral
540	EX_4hbz_e	GSMM_186	EX_glyc_e	GSMM_103	EX_diact_e	('Neutral', 'Neutral')	Neutral	Neutral
541	EX_4hbz_e	GSMM_204	EX_glyc_e	GSMM_103	EX_diact_e	('Neutral', 'Neutral')	Neutral	Neutral
545	EX_4hbz_e	GSMM_230	EX_glyc_e	GSMM_103	EX_diact_e	('Neutral', 'Neutral')	Neutral	Neutral
552	EX_4hbz_e	GSMM_269	EX_glyc_e	GSMM_103	EX_diact_e	('Neutral', 'Neutral')	Neutral	Neutral
553	EX_4hbz_e	GSMM_277	EX_glyc_e	GSMM_103	EX_diact_e	('Neutral', 'Neutral')	Neutral	Neutral
556	EX_4hbz_e	GSMM_316	EX_glyc_e	GSMM_103	EX_diact_e	('Neutral', 'Neutral')	Neutral	Neutral
557	EX_4hbz_e	GSMM_323	EX_glyc_e	GSMM_103	EX_diact_e	('Neutral', 'Neutral')	Neutral	Neutral
558	EX_4hbz_e	GSMM_343	EX_glyc_e	GSMM_103	EX_diact_e	('Neutral', 'Neutral')	Neutral	Neutral
559	EX_4hbz_e	GSMM_344	EX_glyc_e	GSMM_103	EX_diact_e	('Neutral', 'Neutral')	Neutral	Neutral
560	EX_4hbz_e	GSMM_345	EX_glyc_e	GSMM_103	EX_diact_e	('Neutral', 'Neutral')	Neutral	Neutral
561	EX_4hbz_e	GSMM_351	EX_glyc_e	GSMM_103	EX_diact_e	('Neutral', 'Neutral')	Neutral	Neutral
563	EX_4hbz_e	GSMM_357	EX_glyc_e	GSMM_103	EX_diact_e	('Neutral', 'Neutral')	Neutral	Neutral
564	EX_4hbz_e	GSMM_358	EX_glyc_e	GSMM_103	EX_diact_e	('Neutral', 'Neutral')	Neutral	Neutral
565	EX_4hbz_e	GSMM_364	EX_glyc_e	GSMM_103	EX_diact_e	('Neutral', 'Neutral')	Neutral	Neutral
568	EX_4hbz_e	GSMM_382	EX_glyc_e	GSMM_103	EX_diact_e	('Neutral', 'Neutral')	Neutral	Neutral
569	EX_4hbz_e	GSMM_392	EX_glyc_e	GSMM_103	EX_diact_e	('Neutral', 'Neutral')	Neutral	Neutral
570	EX_4hbz_e	GSMM_005	EX_fe3pyovd_kt_e	GSMM_103	EX_diact_e	('Neutral', 'Neutral')	Neutral	Neutral
573	EX_4hbz_e	GSMM_015	EX_fe3pyovd_kt_e	GSMM_103	EX_diact_e	('Neutral', 'Neutral')	Neutral	Neutral
574	EX_4hbz_e	GSMM_016	EX_fe3pyovd_kt_e	GSMM_103	EX_diact_e	('Neutral', 'Neutral')	Neutral	Neutral
577	EX_4hbz_e	GSMM_030	EX_fe3pyovd_kt_e	GSMM_103	EX_diact_e	('Neutral', 'Neutral')	Neutral	Neutral
578	EX_4hbz_e	GSMM_036	EX_fe3pyovd_kt_e	GSMM_103	EX_diact_e	('Neutral', 'Neutral')	Neutral	Neutral
579	EX_4hbz_e	GSMM_037	EX_fe3pyovd_kt_e	GSMM_103	EX_diact_e	('Neutral', 'Neutral')	Neutral	Neutral
580	EX_4hbz_e	GSMM_047	EX_fe3pyovd_kt_e	GSMM_103	EX_diact_e	('Neutral', 'Neutral')	Neutral	Neutral
582	EX_4hbz_e	GSMM_049	EX_fe3pyovd_kt_e	GSMM_103	EX_diact_e	('Neutral', 'Neutral')	Neutral	Neutral
583	EX_4hbz_e	GSMM_051	EX_fe3pyovd_kt_e	GSMM_103	EX_diact_e	('Neutral', 'Neutral')	Neutral	Neutral
584	EX_4hbz_e	GSMM_055	EX_fe3pyovd_kt_e	GSMM_103	EX_diact_e	('Neutral', 'Neutral')	Neutral	Neutral
586	EX_4hbz_e	GSMM_063	EX_fe3pyovd_kt_e	GSMM_103	EX_diact_e	('Neutral', 'Neutral')	Neutral	Neutral
587	EX_4hbz_e	GSMM_069	EX_fe3pyovd_kt_e	GSMM_103	EX_diact_e	('Neutral', 'Neutral')	Neutral	Neutral
588	EX_4hbz_e	GSMM_076	EX_fe3pyovd_kt_e	GSMM_103	EX_diact_e	('Neutral', 'Neutral')	Neutral	Neutral
591	EX_4hbz_e	GSMM_102	EX_fe3pyovd_kt_e	GSMM_103	EX_diact_e	('Neutral', 'Neutral')	Neutral	Neutral
594	EX_4hbz_e	GSMM_119	EX_fe3pyovd_kt_e	GSMM_103	EX_diact_e	('Neutral', 'Neutral')	Neutral	Neutral
595	EX_4hbz_e	GSMM_122	EX_fe3pyovd_kt_e	GSMM_103	EX_diact_e	('Neutral', 'Neutral')	Neutral	Neutral
596	EX_4hbz_e	GSMM_127	EX_fe3pyovd_kt_e	GSMM_103	EX_diact_e	('Neutral', 'Neutral')	Neutral	Neutral
597	EX_4hbz_e	GSMM_135	EX_fe3pyovd_kt_e	GSMM_103	EX_diact_e	('Neutral', 'Neutral')	Neutral	Neutral
600	EX_4hbz_e	GSMM_157	EX_fe3pyovd_kt_e	GSMM_103	EX_diact_e	('Neutral', 'Neutral')	Neutral	Neutral
602	EX_4hbz_e	GSMM_160	EX_fe3pyovd_kt_e	GSMM_103	EX_diact_e	('Neutral', 'Neutral')	Neutral	Neutral
607	EX_4hbz_e	GSMM_186	EX_fe3pyovd_kt_e	GSMM_103	EX_diact_e	('Neutral', 'Neutral')	Neutral	Neutral
608	EX_4hbz_e	GSMM_204	EX_fe3pyovd_kt_e	GSMM_103	EX_diact_e	('Neutral', 'Neutral')	Neutral	Neutral
612	EX_4hbz_e	GSMM_230	EX_fe3pyovd_kt_e	GSMM_103	EX_diact_e	('Neutral', 'Neutral')	Neutral	Neutral
619	EX_4hbz_e	GSMM_269	EX_fe3pyovd_kt_e	GSMM_103	EX_diact_e	('Neutral', 'Neutral')	Neutral	Neutral
620	EX_4hbz_e	GSMM_277	EX_fe3pyovd_kt_e	GSMM_103	EX_diact_e	('Neutral', 'Neutral')	Neutral	Neutral
624	EX_4hbz_e	GSMM_316	EX_fe3pyovd_kt_e	GSMM_103	EX_diact_e	('Neutral', 'Neutral')	Neutral	Neutral
625	EX_4hbz_e	GSMM_323	EX_fe3pyovd_kt_e	GSMM_103	EX_diact_e	('Neutral', 'Neutral')	Neutral	Neutral
626	EX_4hbz_e	GSMM_343	EX_fe3pyovd_kt_e	GSMM_103	EX_diact_e	('Neutral', 'Neutral')	Neutral	Neutral
627	EX_4hbz_e	GSMM_344	EX_fe3pyovd_kt_e	GSMM_103	EX_diact_e	('Neutral', 'Neutral')	Neutral	Neutral
628	EX_4hbz_e	GSMM_345	EX_fe3pyovd_kt_e	GSMM_103	EX_diact_e	('Neutral', 'Neutral')	Neutral	Neutral
629	EX_4hbz_e	GSMM_351	EX_fe3pyovd_kt_e	GSMM_103	EX_diact_e	('Neutral', 'Neutral')	Neutral	Neutral
631	EX_4hbz_e	GSMM_357	EX_fe3pyovd_kt_e	GSMM_103	EX_diact_e	('Neutral', 'Neutral')	Neutral	Neutral
632	EX_4hbz_e	GSMM_358	EX_fe3pyovd_kt_e	GSMM_103	EX_diact_e	('Neutral', 'Neutral')	Neutral	Neutral
633	EX_4hbz_e	GSMM_364	EX_fe3pyovd_kt_e	GSMM_103	EX_diact_e	('Neutral', 'Neutral')	Neutral	Neutral
636	EX_4hbz_e	GSMM_382	EX_fe3pyovd_kt_e	GSMM_103	EX_diact_e	('Neutral', 'Neutral')	Neutral	Neutral
637	EX_4hbz_e	GSMM_392	EX_fe3pyovd_kt_e	GSMM_103	EX_diact_e	('Neutral', 'Neutral')	Neutral	Neutral
638	EX_4hbz_e	GSMM_005	EX_pyovd_kt_e	GSMM_103	EX_diact_e	('Neutral', 'Neutral')	Neutral	Neutral
641	EX_4hbz_e	GSMM_015	EX_pyovd_kt_e	GSMM_103	EX_diact_e	('Neutral', 'Neutral')	Neutral	Neutral
642	EX_4hbz_e	GSMM_016	EX_pyovd_kt_e	GSMM_103	EX_diact_e	('Neutral', 'Neutral')	Neutral	Neutral
645	EX_4hbz_e	GSMM_030	EX_pyovd_kt_e	GSMM_103	EX_diact_e	('Neutral', 'Neutral')	Neutral	Neutral
646	EX_4hbz_e	GSMM_036	EX_pyovd_kt_e	GSMM_103	EX_diact_e	('Neutral', 'Neutral')	Neutral	Neutral
647	EX_4hbz_e	GSMM_037	EX_pyovd_kt_e	GSMM_103	EX_diact_e	('Neutral', 'Neutral')	Neutral	Neutral
648	EX_4hbz_e	GSMM_047	EX_pyovd_kt_e	GSMM_103	EX_diact_e	('Neutral', 'Neutral')	Neutral	Neutral
650	EX_4hbz_e	GSMM_049	EX_pyovd_kt_e	GSMM_103	EX_diact_e	('Neutral', 'Neutral')	Neutral	Neutral
651	EX_4hbz_e	GSMM_051	EX_pyovd_kt_e	GSMM_103	EX_diact_e	('Neutral', 'Neutral')	Neutral	Neutral
652	EX_4hbz_e	GSMM_055	EX_pyovd_kt_e	GSMM_103	EX_diact_e	('Neutral', 'Neutral')	Neutral	Neutral
654	EX_4hbz_e	GSMM_063	EX_pyovd_kt_e	GSMM_103	EX_diact_e	('Neutral', 'Neutral')	Neutral	Neutral
655	EX_4hbz_e	GSMM_069	EX_pyovd_kt_e	GSMM_103	EX_diact_e	('Neutral', 'Neutral')	Neutral	Neutral
656	EX_4hbz_e	GSMM_076	EX_pyovd_kt_e	GSMM_103	EX_diact_e	('Neutral', 'Neutral')	Neutral	Neutral
659	EX_4hbz_e	GSMM_102	EX_pyovd_kt_e	GSMM_103	EX_diact_e	('Neutral', 'Neutral')	Neutral	Neutral
662	EX_4hbz_e	GSMM_119	EX_pyovd_kt_e	GSMM_103	EX_diact_e	('Neutral', 'Neutral')	Neutral	Neutral
663	EX_4hbz_e	GSMM_122	EX_pyovd_kt_e	GSMM_103	EX_diact_e	('Neutral', 'Neutral')	Neutral	Neutral
664	EX_4hbz_e	GSMM_127	EX_pyovd_kt_e	GSMM_103	EX_diact_e	('Neutral', 'Neutral')	Neutral	Neutral
665	EX_4hbz_e	GSMM_135	EX_pyovd_kt_e	GSMM_103	EX_diact_e	('Neutral', 'Neutral')	Neutral	Neutral
668	EX_4hbz_e	GSMM_157	EX_pyovd_kt_e	GSMM_103	EX_diact_e	('Neutral', 'Neutral')	Neutral	Neutral
670	EX_4hbz_e	GSMM_160	EX_pyovd_kt_e	GSMM_103	EX_diact_e	('Neutral', 'Neutral')	Neutral	Neutral
675	EX_4hbz_e	GSMM_186	EX_pyovd_kt_e	GSMM_103	EX_diact_e	('Neutral', 'Neutral')	Neutral	Neutral
676	EX_4hbz_e	GSMM_204	EX_pyovd_kt_e	GSMM_103	EX_diact_e	('Neutral', 'Neutral')	Neutral	Neutral
680	EX_4hbz_e	GSMM_230	EX_pyovd_kt_e	GSMM_103	EX_diact_e	('Neutral', 'Neutral')	Neutral	Neutral
687	EX_4hbz_e	GSMM_269	EX_pyovd_kt_e	GSMM_103	EX_diact_e	('Neutral', 'Neutral')	Neutral	Neutral
688	EX_4hbz_e	GSMM_277	EX_pyovd_kt_e	GSMM_103	EX_diact_e	('Neutral', 'Neutral')	Neutral	Neutral
692	EX_4hbz_e	GSMM_316	EX_pyovd_kt_e	GSMM_103	EX_diact_e	('Neutral', 'Neutral')	Neutral	Neutral
693	EX_4hbz_e	GSMM_323	EX_pyovd_kt_e	GSMM_103	EX_diact_e	('Neutral', 'Neutral')	Neutral	Neutral
694	EX_4hbz_e	GSMM_343	EX_pyovd_kt_e	GSMM_103	EX_diact_e	('Neutral', 'Neutral')	Neutral	Neutral
695	EX_4hbz_e	GSMM_344	EX_pyovd_kt_e	GSMM_103	EX_diact_e	('Neutral', 'Neutral')	Neutral	Neutral
696	EX_4hbz_e	GSMM_345	EX_pyovd_kt_e	GSMM_103	EX_diact_e	('Neutral', 'Neutral')	Neutral	Neutral
697	EX_4hbz_e	GSMM_351	EX_pyovd_kt_e	GSMM_103	EX_diact_e	('Neutral', 'Neutral')	Neutral	Neutral
699	EX_4hbz_e	GSMM_357	EX_pyovd_kt_e	GSMM_103	EX_diact_e	('Neutral', 'Neutral')	Neutral	Neutral
700	EX_4hbz_e	GSMM_358	EX_pyovd_kt_e	GSMM_103	EX_diact_e	('Neutral', 'Neutral')	Neutral	Neutral
701	EX_4hbz_e	GSMM_364	EX_pyovd_kt_e	GSMM_103	EX_diact_e	('Neutral', 'Neutral')	Neutral	Neutral
704	EX_4hbz_e	GSMM_382	EX_pyovd_kt_e	GSMM_103	EX_diact_e	('Neutral', 'Neutral')	Neutral	Neutral
705	EX_4hbz_e	GSMM_392	EX_pyovd_kt_e	GSMM_103	EX_diact_e	('Neutral', 'Neutral')	Neutral	Neutral
706	EX_4hbz_e	GSMM_005	EX_cellb_e	GSMM_103	EX_diact_e	('Neutral', 'Neutral')	Neutral	Neutral
708	EX_4hbz_e	GSMM_069	EX_cellb_e	GSMM_103	EX_diact_e	('Neutral', 'Neutral')	Neutral	Neutral
713	EX_4hbz_e	GSMM_005	EX_lac__L_e	GSMM_103	EX_diact_e	('Neutral', 'Neutral')	Neutral	Neutral
714	EX_4hbz_e	GSMM_015	EX_lac__L_e	GSMM_103	EX_diact_e	('Neutral', 'Neutral')	Neutral	Neutral
716	EX_4hbz_e	GSMM_036	EX_lac__L_e	GSMM_103	EX_diact_e	('Neutral', 'Neutral')	Neutral	Neutral
717	EX_4hbz_e	GSMM_051	EX_lac__L_e	GSMM_103	EX_diact_e	('Neutral', 'Neutral')	Neutral	Neutral
720	EX_4hbz_e	GSMM_122	EX_lac__L_e	GSMM_103	EX_diact_e	('Neutral', 'Neutral')	Neutral	Neutral
721	EX_4hbz_e	GSMM_127	EX_lac__L_e	GSMM_103	EX_diact_e	('Neutral', 'Neutral')	Neutral	Neutral
722	EX_4hbz_e	GSMM_135	EX_lac__L_e	GSMM_103	EX_diact_e	('Neutral', 'Neutral')	Neutral	Neutral
726	EX_4hbz_e	GSMM_186	EX_lac__L_e	GSMM_103	EX_diact_e	('Neutral', 'Neutral')	Neutral	Neutral
731	EX_4hbz_e	GSMM_316	EX_lac__L_e	GSMM_103	EX_diact_e	('Neutral', 'Neutral')	Neutral	Neutral
732	EX_4hbz_e	GSMM_323	EX_lac__L_e	GSMM_103	EX_diact_e	('Neutral', 'Neutral')	Neutral	Neutral
733	EX_4hbz_e	GSMM_344	EX_lac__L_e	GSMM_103	EX_diact_e	('Neutral', 'Neutral')	Neutral	Neutral
734	EX_4hbz_e	GSMM_345	EX_lac__L_e	GSMM_103	EX_diact_e	('Neutral', 'Neutral')	Neutral	Neutral
735	EX_4hbz_e	GSMM_351	EX_lac__L_e	GSMM_103	EX_diact_e	('Neutral', 'Neutral')	Neutral	Neutral
738	EX_4hbz_e	GSMM_382	EX_lac__L_e	GSMM_103	EX_diact_e	('Neutral', 'Neutral')	Neutral	Neutral
739	EX_4hbz_e	GSMM_005	EX_oxa_e	GSMM_103	EX_diact_e	('Neutral', 'Neutral')	Neutral	Neutral
741	EX_4hbz_e	GSMM_015	EX_oxa_e	GSMM_103	EX_diact_e	('Neutral', 'Neutral')	Neutral	Neutral
742	EX_4hbz_e	GSMM_016	EX_oxa_e	GSMM_103	EX_diact_e	('Neutral', 'Neutral')	Neutral	Neutral
743	EX_4hbz_e	GSMM_036	EX_oxa_e	GSMM_103	EX_diact_e	('Neutral', 'Neutral')	Neutral	Neutral
745	EX_4hbz_e	GSMM_049	EX_oxa_e	GSMM_103	EX_diact_e	('Neutral', 'Neutral')	Neutral	Neutral
746	EX_4hbz_e	GSMM_051	EX_oxa_e	GSMM_103	EX_diact_e	('Neutral', 'Neutral')	Neutral	Neutral
747	EX_4hbz_e	GSMM_069	EX_oxa_e	GSMM_103	EX_diact_e	('Neutral', 'Neutral')	Neutral	Neutral
748	EX_4hbz_e	GSMM_076	EX_oxa_e	GSMM_103	EX_diact_e	('Neutral', 'Neutral')	Neutral	Neutral
749	EX_4hbz_e	GSMM_102	EX_oxa_e	GSMM_103	EX_diact_e	('Neutral', 'Neutral')	Neutral	Neutral
752	EX_4hbz_e	GSMM_122	EX_oxa_e	GSMM_103	EX_diact_e	('Neutral', 'Neutral')	Neutral	Neutral
753	EX_4hbz_e	GSMM_135	EX_oxa_e	GSMM_103	EX_diact_e	('Neutral', 'Neutral')	Neutral	Neutral
755	EX_4hbz_e	GSMM_157	EX_oxa_e	GSMM_103	EX_diact_e	('Neutral', 'Neutral')	Neutral	Neutral
758	EX_4hbz_e	GSMM_186	EX_oxa_e	GSMM_103	EX_diact_e	('Neutral', 'Neutral')	Neutral	Neutral
766	EX_4hbz_e	GSMM_323	EX_oxa_e	GSMM_103	EX_diact_e	('Neutral', 'Neutral')	Neutral	Neutral
767	EX_4hbz_e	GSMM_344	EX_oxa_e	GSMM_103	EX_diact_e	('Neutral', 'Neutral')	Neutral	Neutral
769	EX_4hbz_e	GSMM_357	EX_oxa_e	GSMM_103	EX_diact_e	('Neutral', 'Neutral')	Neutral	Neutral
771	EX_4hbz_e	GSMM_382	EX_oxa_e	GSMM_103	EX_diact_e	('Neutral', 'Neutral')	Neutral	Neutral
772	EX_4hbz_e	GSMM_005	EX_anhgm_e	GSMM_103	EX_diact_e	('Neutral', 'Neutral')	Neutral	Neutral
774	EX_4hbz_e	GSMM_016	EX_anhgm_e	GSMM_103	EX_diact_e	('Neutral', 'Neutral')	Neutral	Neutral
777	EX_4hbz_e	GSMM_030	EX_anhgm_e	GSMM_103	EX_diact_e	('Neutral', 'Neutral')	Neutral	Neutral
778	EX_4hbz_e	GSMM_047	EX_anhgm_e	GSMM_103	EX_diact_e	('Neutral', 'Neutral')	Neutral	Neutral
782	EX_4hbz_e	GSMM_102	EX_anhgm_e	GSMM_103	EX_diact_e	('Neutral', 'Neutral')	Neutral	Neutral
783	EX_4hbz_e	GSMM_122	EX_anhgm_e	GSMM_103	EX_diact_e	('Neutral', 'Neutral')	Neutral	Neutral
784	EX_4hbz_e	GSMM_127	EX_anhgm_e	GSMM_103	EX_diact_e	('Neutral', 'Neutral')	Neutral	Neutral
785	EX_4hbz_e	GSMM_135	EX_anhgm_e	GSMM_103	EX_diact_e	('Neutral', 'Neutral')	Neutral	Neutral
786	EX_4hbz_e	GSMM_160	EX_anhgm_e	GSMM_103	EX_diact_e	('Neutral', 'Neutral')	Neutral	Neutral
790	EX_4hbz_e	GSMM_186	EX_anhgm_e	GSMM_103	EX_diact_e	('Neutral', 'Neutral')	Neutral	Neutral
799	EX_4hbz_e	GSMM_269	EX_anhgm_e	GSMM_103	EX_diact_e	('Neutral', 'Neutral')	Neutral	Neutral
800	EX_4hbz_e	GSMM_277	EX_anhgm_e	GSMM_103	EX_diact_e	('Neutral', 'Neutral')	Neutral	Neutral
802	EX_4hbz_e	GSMM_323	EX_anhgm_e	GSMM_103	EX_diact_e	('Neutral', 'Neutral')	Neutral	Neutral
803	EX_4hbz_e	GSMM_343	EX_anhgm_e	GSMM_103	EX_diact_e	('Neutral', 'Neutral')	Neutral	Neutral
804	EX_4hbz_e	GSMM_357	EX_anhgm_e	GSMM_103	EX_diact_e	('Neutral', 'Neutral')	Neutral	Neutral
805	EX_4hbz_e	GSMM_364	EX_anhgm_e	GSMM_103	EX_diact_e	('Neutral', 'Neutral')	Neutral	Neutral
808	EX_4hbz_e	GSMM_382	EX_anhgm_e	GSMM_103	EX_diact_e	('Neutral', 'Neutral')	Neutral	Neutral
809	EX_4hbz_e	GSMM_005	EX_urea_e	GSMM_103	EX_diact_e	('Neutral', 'Neutral')	Neutral	Neutral
812	EX_4hbz_e	GSMM_015	EX_urea_e	GSMM_103	EX_diact_e	('Neutral', 'Neutral')	Neutral	Neutral
813	EX_4hbz_e	GSMM_016	EX_urea_e	GSMM_103	EX_diact_e	('Neutral', 'Neutral')	Neutral	Neutral
815	EX_4hbz_e	GSMM_030	EX_urea_e	GSMM_103	EX_diact_e	('Neutral', 'Neutral')	Neutral	Neutral
816	EX_4hbz_e	GSMM_036	EX_urea_e	GSMM_103	EX_diact_e	('Neutral', 'Neutral')	Neutral	Neutral
817	EX_4hbz_e	GSMM_037	EX_urea_e	GSMM_103	EX_diact_e	('Neutral', 'Neutral')	Neutral	Neutral
818	EX_4hbz_e	GSMM_047	EX_urea_e	GSMM_103	EX_diact_e	('Neutral', 'Neutral')	Neutral	Neutral
820	EX_4hbz_e	GSMM_049	EX_urea_e	GSMM_103	EX_diact_e	('Neutral', 'Neutral')	Neutral	Neutral
821	EX_4hbz_e	GSMM_051	EX_urea_e	GSMM_103	EX_diact_e	('Neutral', 'Neutral')	Neutral	Neutral
822	EX_4hbz_e	GSMM_055	EX_urea_e	GSMM_103	EX_diact_e	('Neutral', 'Neutral')	Neutral	Neutral
824	EX_4hbz_e	GSMM_076	EX_urea_e	GSMM_103	EX_diact_e	('Neutral', 'Neutral')	Neutral	Neutral
827	EX_4hbz_e	GSMM_102	EX_urea_e	GSMM_103	EX_diact_e	('Neutral', 'Neutral')	Neutral	Neutral
830	EX_4hbz_e	GSMM_119	EX_urea_e	GSMM_103	EX_diact_e	('Neutral', 'Neutral')	Neutral	Neutral
831	EX_4hbz_e	GSMM_122	EX_urea_e	GSMM_103	EX_diact_e	('Neutral', 'Neutral')	Neutral	Neutral
832	EX_4hbz_e	GSMM_127	EX_urea_e	GSMM_103	EX_diact_e	('Neutral', 'Neutral')	Neutral	Neutral
833	EX_4hbz_e	GSMM_135	EX_urea_e	GSMM_103	EX_diact_e	('Neutral', 'Neutral')	Neutral	Neutral
834	EX_4hbz_e	GSMM_157	EX_urea_e	GSMM_103	EX_diact_e	('Neutral', 'Neutral')	Neutral	Neutral
838	EX_4hbz_e	GSMM_186	EX_urea_e	GSMM_103	EX_diact_e	('Neutral', 'Neutral')	Neutral	Neutral
839	EX_4hbz_e	GSMM_204	EX_urea_e	GSMM_103	EX_diact_e	('Neutral', 'Neutral')	Neutral	Neutral
847	EX_4hbz_e	GSMM_269	EX_urea_e	GSMM_103	EX_diact_e	('Neutral', 'Neutral')	Neutral	Neutral
848	EX_4hbz_e	GSMM_277	EX_urea_e	GSMM_103	EX_diact_e	('Neutral', 'Neutral')	Neutral	Neutral
852	EX_4hbz_e	GSMM_316	EX_urea_e	GSMM_103	EX_diact_e	('Neutral', 'Neutral')	Neutral	Neutral
853	EX_4hbz_e	GSMM_323	EX_urea_e	GSMM_103	EX_diact_e	('Neutral', 'Neutral')	Neutral	Neutral
854	EX_4hbz_e	GSMM_343	EX_urea_e	GSMM_103	EX_diact_e	('Neutral', 'Neutral')	Neutral	Neutral
855	EX_4hbz_e	GSMM_344	EX_urea_e	GSMM_103	EX_diact_e	('Neutral', 'Neutral')	Neutral	Neutral
856	EX_4hbz_e	GSMM_345	EX_urea_e	GSMM_103	EX_diact_e	('Neutral', 'Neutral')	Neutral	Neutral
858	EX_4hbz_e	GSMM_357	EX_urea_e	GSMM_103	EX_diact_e	('Neutral', 'Neutral')	Neutral	Neutral
859	EX_4hbz_e	GSMM_358	EX_urea_e	GSMM_103	EX_diact_e	('Neutral', 'Neutral')	Neutral	Neutral
860	EX_4hbz_e	GSMM_364	EX_urea_e	GSMM_103	EX_diact_e	('Neutral', 'Neutral')	Neutral	Neutral
863	EX_4hbz_e	GSMM_392	EX_urea_e	GSMM_103	EX_diact_e	('Neutral', 'Neutral')	Neutral	Neutral
864	EX_4hbz_e	GSMM_005	EX_inost_e	GSMM_103	EX_diact_e	('Neutral', 'Neutral')	Neutral	Neutral
866	EX_4hbz_e	GSMM_015	EX_inost_e	GSMM_103	EX_diact_e	('Neutral', 'Neutral')	Neutral	Neutral
867	EX_4hbz_e	GSMM_016	EX_inost_e	GSMM_103	EX_diact_e	('Neutral', 'Neutral')	Neutral	Neutral
869	EX_4hbz_e	GSMM_036	EX_inost_e	GSMM_103	EX_diact_e	('Neutral', 'Neutral')	Neutral	Neutral
871	EX_4hbz_e	GSMM_051	EX_inost_e	GSMM_103	EX_diact_e	('Neutral', 'Neutral')	Neutral	Neutral
872	EX_4hbz_e	GSMM_063	EX_inost_e	GSMM_103	EX_diact_e	('Neutral', 'Neutral')	Neutral	Neutral
874	EX_4hbz_e	GSMM_102	EX_inost_e	GSMM_103	EX_diact_e	('Neutral', 'Neutral')	Neutral	Neutral
876	EX_4hbz_e	GSMM_127	EX_inost_e	GSMM_103	EX_diact_e	('Neutral', 'Neutral')	Neutral	Neutral
879	EX_4hbz_e	GSMM_157	EX_inost_e	GSMM_103	EX_diact_e	('Neutral', 'Neutral')	Neutral	Neutral
880	EX_4hbz_e	GSMM_160	EX_inost_e	GSMM_103	EX_diact_e	('Neutral', 'Neutral')	Neutral	Neutral
885	EX_4hbz_e	GSMM_230	EX_inost_e	GSMM_103	EX_diact_e	('Neutral', 'Neutral')	Neutral	Neutral
887	EX_4hbz_e	GSMM_345	EX_inost_e	GSMM_103	EX_diact_e	('Neutral', 'Neutral')	Neutral	Neutral
889	EX_4hbz_e	GSMM_382	EX_inost_e	GSMM_103	EX_diact_e	('Neutral', 'Neutral')	Neutral	Neutral
890	EX_4hbz_e	GSMM_005	EX_chol_e	GSMM_103	EX_diact_e	('Neutral', 'Neutral')	Neutral	Neutral
893	EX_4hbz_e	GSMM_015	EX_chol_e	GSMM_103	EX_diact_e	('Neutral', 'Neutral')	Neutral	Neutral
895	EX_4hbz_e	GSMM_030	EX_chol_e	GSMM_103	EX_diact_e	('Neutral', 'Neutral')	Neutral	Neutral
896	EX_4hbz_e	GSMM_049	EX_chol_e	GSMM_103	EX_diact_e	('Neutral', 'Neutral')	Neutral	Neutral
897	EX_4hbz_e	GSMM_055	EX_chol_e	GSMM_103	EX_diact_e	('Neutral', 'Neutral')	Neutral	Neutral
898	EX_4hbz_e	GSMM_063	EX_chol_e	GSMM_103	EX_diact_e	('Neutral', 'Neutral')	Neutral	Neutral
901	EX_4hbz_e	GSMM_127	EX_chol_e	GSMM_103	EX_diact_e	('Neutral', 'Neutral')	Neutral	Neutral
904	EX_4hbz_e	GSMM_157	EX_chol_e	GSMM_103	EX_diact_e	('Neutral', 'Neutral')	Neutral	Neutral
906	EX_4hbz_e	GSMM_186	EX_chol_e	GSMM_103	EX_diact_e	('Neutral', 'Neutral')	Neutral	Neutral
910	EX_4hbz_e	GSMM_230	EX_chol_e	GSMM_103	EX_diact_e	('Neutral', 'Neutral')	Neutral	Neutral
915	EX_4hbz_e	GSMM_277	EX_chol_e	GSMM_103	EX_diact_e	('Neutral', 'Neutral')	Neutral	Neutral
917	EX_4hbz_e	GSMM_316	EX_chol_e	GSMM_103	EX_diact_e	('Neutral', 'Neutral')	Neutral	Neutral
918	EX_4hbz_e	GSMM_323	EX_chol_e	GSMM_103	EX_diact_e	('Neutral', 'Neutral')	Neutral	Neutral
919	EX_4hbz_e	GSMM_343	EX_chol_e	GSMM_103	EX_diact_e	('Neutral', 'Neutral')	Neutral	Neutral
920	EX_4hbz_e	GSMM_344	EX_chol_e	GSMM_103	EX_diact_e	('Neutral', 'Neutral')	Neutral	Neutral
921	EX_4hbz_e	GSMM_345	EX_chol_e	GSMM_103	EX_diact_e	('Neutral', 'Neutral')	Neutral	Neutral
923	EX_4hbz_e	GSMM_357	EX_chol_e	GSMM_103	EX_diact_e	('Neutral', 'Neutral')	Neutral	Neutral
924	EX_4hbz_e	GSMM_364	EX_chol_e	GSMM_103	EX_diact_e	('Neutral', 'Neutral')	Neutral	Neutral
926	EX_4hbz_e	GSMM_005	EX_stfrnA_e	GSMM_103	EX_diact_e	('Neutral', 'Neutral')	Neutral	Neutral
927	EX_4hbz_e	GSMM_016	EX_stfrnA_e	GSMM_103	EX_diact_e	('Neutral', 'Neutral')	Neutral	Neutral
930	EX_4hbz_e	GSMM_049	EX_stfrnA_e	GSMM_103	EX_diact_e	('Neutral', 'Neutral')	Neutral	Neutral
931	EX_4hbz_e	GSMM_051	EX_stfrnA_e	GSMM_103	EX_diact_e	('Neutral', 'Neutral')	Neutral	Neutral
932	EX_4hbz_e	GSMM_055	EX_stfrnA_e	GSMM_103	EX_diact_e	('Neutral', 'Neutral')	Neutral	Neutral
933	EX_4hbz_e	GSMM_076	EX_stfrnA_e	GSMM_103	EX_diact_e	('Neutral', 'Neutral')	Neutral	Neutral
936	EX_4hbz_e	GSMM_122	EX_stfrnA_e	GSMM_103	EX_diact_e	('Neutral', 'Neutral')	Neutral	Neutral
937	EX_4hbz_e	GSMM_135	EX_stfrnA_e	GSMM_103	EX_diact_e	('Neutral', 'Neutral')	Neutral	Neutral
939	EX_4hbz_e	GSMM_157	EX_stfrnA_e	GSMM_103	EX_diact_e	('Neutral', 'Neutral')	Neutral	Neutral
943	EX_4hbz_e	GSMM_186	EX_stfrnA_e	GSMM_103	EX_diact_e	('Neutral', 'Neutral')	Neutral	Neutral
944	EX_4hbz_e	GSMM_204	EX_stfrnA_e	GSMM_103	EX_diact_e	('Neutral', 'Neutral')	Neutral	Neutral
946	EX_4hbz_e	GSMM_230	EX_stfrnA_e	GSMM_103	EX_diact_e	('Neutral', 'Neutral')	Neutral	Neutral
949	EX_4hbz_e	GSMM_277	EX_stfrnA_e	GSMM_103	EX_diact_e	('Neutral', 'Neutral')	Neutral	Neutral
950	EX_4hbz_e	GSMM_323	EX_stfrnA_e	GSMM_103	EX_diact_e	('Neutral', 'Neutral')	Neutral	Neutral
951	EX_4hbz_e	GSMM_345	EX_stfrnA_e	GSMM_103	EX_diact_e	('Neutral', 'Neutral')	Neutral	Neutral
952	EX_4hbz_e	GSMM_351	EX_stfrnA_e	GSMM_103	EX_diact_e	('Neutral', 'Neutral')	Neutral	Neutral
954	EX_4hbz_e	GSMM_358	EX_stfrnA_e	GSMM_103	EX_diact_e	('Neutral', 'Neutral')	Neutral	Neutral
956	EX_4hbz_e	GSMM_382	EX_stfrnA_e	GSMM_103	EX_diact_e	('Neutral', 'Neutral')	Neutral	Neutral
958	EX_4hbz_e	GSMM_036	EX_glyald_e	GSMM_103	EX_diact_e	('Neutral', 'Neutral')	Neutral	Neutral
959	EX_4hbz_e	GSMM_037	EX_glyald_e	GSMM_103	EX_diact_e	('Neutral', 'Neutral')	Neutral	Neutral
960	EX_4hbz_e	GSMM_049	EX_glyald_e	GSMM_103	EX_diact_e	('Neutral', 'Neutral')	Neutral	Neutral
964	EX_4hbz_e	GSMM_102	EX_glyald_e	GSMM_103	EX_diact_e	('Neutral', 'Neutral')	Neutral	Neutral
966	EX_4hbz_e	GSMM_119	EX_glyald_e	GSMM_103	EX_diact_e	('Neutral', 'Neutral')	Neutral	Neutral
967	EX_4hbz_e	GSMM_135	EX_glyald_e	GSMM_103	EX_diact_e	('Neutral', 'Neutral')	Neutral	Neutral
969	EX_4hbz_e	GSMM_160	EX_glyald_e	GSMM_103	EX_diact_e	('Neutral', 'Neutral')	Neutral	Neutral
973	EX_4hbz_e	GSMM_186	EX_glyald_e	GSMM_103	EX_diact_e	('Neutral', 'Neutral')	Neutral	Neutral
974	EX_4hbz_e	GSMM_204	EX_glyald_e	GSMM_103	EX_diact_e	('Neutral', 'Neutral')	Neutral	Neutral
976	EX_4hbz_e	GSMM_230	EX_glyald_e	GSMM_103	EX_diact_e	('Neutral', 'Neutral')	Neutral	Neutral
980	EX_4hbz_e	GSMM_269	EX_glyald_e	GSMM_103	EX_diact_e	('Neutral', 'Neutral')	Neutral	Neutral
981	EX_4hbz_e	GSMM_277	EX_glyald_e	GSMM_103	EX_diact_e	('Neutral', 'Neutral')	Neutral	Neutral
983	EX_4hbz_e	GSMM_316	EX_glyald_e	GSMM_103	EX_diact_e	('Neutral', 'Neutral')	Neutral	Neutral
984	EX_4hbz_e	GSMM_323	EX_glyald_e	GSMM_103	EX_diact_e	('Neutral', 'Neutral')	Neutral	Neutral
985	EX_4hbz_e	GSMM_345	EX_glyald_e	GSMM_103	EX_diact_e	('Neutral', 'Neutral')	Neutral	Neutral
986	EX_4hbz_e	GSMM_364	EX_glyald_e	GSMM_103	EX_diact_e	('Neutral', 'Neutral')	Neutral	Neutral
988	EX_4hbz_e	GSMM_392	EX_glyald_e	GSMM_103	EX_diact_e	('Neutral', 'Neutral')	Neutral	Neutral
991	EX_4hbz_e	GSMM_030	EX_ura_e	GSMM_103	EX_diact_e	('Neutral', 'Neutral')	Neutral	Neutral
992	EX_4hbz_e	GSMM_036	EX_ura_e	GSMM_103	EX_diact_e	('Neutral', 'Neutral')	Neutral	Neutral
993	EX_4hbz_e	GSMM_037	EX_ura_e	GSMM_103	EX_diact_e	('Neutral', 'Neutral')	Neutral	Neutral
994	EX_4hbz_e	GSMM_047	EX_ura_e	GSMM_103	EX_diact_e	('Neutral', 'Neutral')	Neutral	Neutral
997	EX_4hbz_e	GSMM_069	EX_ura_e	GSMM_103	EX_diact_e	('Neutral', 'Neutral')	Neutral	Neutral
999	EX_4hbz_e	GSMM_119	EX_ura_e	GSMM_103	EX_diact_e	('Neutral', 'Neutral')	Neutral	Neutral
1001	EX_4hbz_e	GSMM_160	EX_ura_e	GSMM_103	EX_diact_e	('Neutral', 'Neutral')	Neutral	Neutral
1009	EX_4hbz_e	GSMM_269	EX_ura_e	GSMM_103	EX_diact_e	('Neutral', 'Neutral')	Neutral	Neutral
1011	EX_4hbz_e	GSMM_316	EX_ura_e	GSMM_103	EX_diact_e	('Neutral', 'Neutral')	Neutral	Neutral
1012	EX_4hbz_e	GSMM_343	EX_ura_e	GSMM_103	EX_diact_e	('Neutral', 'Neutral')	Neutral	Neutral
1013	EX_4hbz_e	GSMM_357	EX_ura_e	GSMM_103	EX_diact_e	('Neutral', 'Neutral')	Neutral	Neutral
1014	EX_4hbz_e	GSMM_364	EX_ura_e	GSMM_103	EX_diact_e	('Neutral', 'Neutral')	Neutral	Neutral
1018	EX_4hbz_e	GSMM_036	EX_gal_e	GSMM_103	EX_diact_e	('Neutral', 'Neutral')	Neutral	Neutral
1019	EX_4hbz_e	GSMM_037	EX_gal_e	GSMM_103	EX_diact_e	('Neutral', 'Neutral')	Neutral	Neutral
1020	EX_4hbz_e	GSMM_047	EX_gal_e	GSMM_103	EX_diact_e	('Neutral', 'Neutral')	Neutral	Neutral
1022	EX_4hbz_e	GSMM_049	EX_gal_e	GSMM_103	EX_diact_e	('Neutral', 'Neutral')	Neutral	Neutral
1024	EX_4hbz_e	GSMM_063	EX_gal_e	GSMM_103	EX_diact_e	('Neutral', 'Neutral')	Neutral	Neutral
1025	EX_4hbz_e	GSMM_069	EX_gal_e	GSMM_103	EX_diact_e	('Neutral', 'Neutral')	Neutral	Neutral
1028	EX_4hbz_e	GSMM_119	EX_gal_e	GSMM_103	EX_diact_e	('Neutral', 'Neutral')	Neutral	Neutral
1029	EX_4hbz_e	GSMM_122	EX_gal_e	GSMM_103	EX_diact_e	('Neutral', 'Neutral')	Neutral	Neutral
1030	EX_4hbz_e	GSMM_127	EX_gal_e	GSMM_103	EX_diact_e	('Neutral', 'Neutral')	Neutral	Neutral
1031	EX_4hbz_e	GSMM_135	EX_gal_e	GSMM_103	EX_diact_e	('Neutral', 'Neutral')	Neutral	Neutral
1033	EX_4hbz_e	GSMM_157	EX_gal_e	GSMM_103	EX_diact_e	('Neutral', 'Neutral')	Neutral	Neutral
1034	EX_4hbz_e	GSMM_160	EX_gal_e	GSMM_103	EX_diact_e	('Neutral', 'Neutral')	Neutral	Neutral
1039	EX_4hbz_e	GSMM_230	EX_gal_e	GSMM_103	EX_diact_e	('Neutral', 'Neutral')	Neutral	Neutral
1045	EX_4hbz_e	GSMM_277	EX_gal_e	GSMM_103	EX_diact_e	('Neutral', 'Neutral')	Neutral	Neutral
1046	EX_4hbz_e	GSMM_316	EX_gal_e	GSMM_103	EX_diact_e	('Neutral', 'Neutral')	Neutral	Neutral
1047	EX_4hbz_e	GSMM_323	EX_gal_e	GSMM_103	EX_diact_e	('Neutral', 'Neutral')	Neutral	Neutral
1048	EX_4hbz_e	GSMM_343	EX_gal_e	GSMM_103	EX_diact_e	('Neutral', 'Neutral')	Neutral	Neutral
1049	EX_4hbz_e	GSMM_344	EX_gal_e	GSMM_103	EX_diact_e	('Neutral', 'Neutral')	Neutral	Neutral
1050	EX_4hbz_e	GSMM_351	EX_gal_e	GSMM_103	EX_diact_e	('Neutral', 'Neutral')	Neutral	Neutral
1052	EX_4hbz_e	GSMM_357	EX_gal_e	GSMM_103	EX_diact_e	('Neutral', 'Neutral')	Neutral	Neutral
1053	EX_4hbz_e	GSMM_358	EX_gal_e	GSMM_103	EX_diact_e	('Neutral', 'Neutral')	Neutral	Neutral
1055	EX_4hbz_e	GSMM_392	EX_gal_e	GSMM_103	EX_diact_e	('Neutral', 'Neutral')	Neutral	Neutral
1057	EX_4hbz_e	GSMM_016	EX_ala__D_e	GSMM_103	EX_diact_e	('Neutral', 'Neutral')	Neutral	Neutral
1060	EX_4hbz_e	GSMM_049	EX_ala__D_e	GSMM_103	EX_diact_e	('Neutral', 'Neutral')	Neutral	Neutral
1061	EX_4hbz_e	GSMM_055	EX_ala__D_e	GSMM_103	EX_diact_e	('Neutral', 'Neutral')	Neutral	Neutral
1063	EX_4hbz_e	GSMM_063	EX_ala__D_e	GSMM_103	EX_diact_e	('Neutral', 'Neutral')	Neutral	Neutral
1066	EX_4hbz_e	GSMM_119	EX_ala__D_e	GSMM_103	EX_diact_e	('Neutral', 'Neutral')	Neutral	Neutral
1069	EX_4hbz_e	GSMM_157	EX_ala__D_e	GSMM_103	EX_diact_e	('Neutral', 'Neutral')	Neutral	Neutral
1072	EX_4hbz_e	GSMM_204	EX_ala__D_e	GSMM_103	EX_diact_e	('Neutral', 'Neutral')	Neutral	Neutral
1080	EX_4hbz_e	GSMM_269	EX_ala__D_e	GSMM_103	EX_diact_e	('Neutral', 'Neutral')	Neutral	Neutral
1084	EX_4hbz_e	GSMM_323	EX_ala__D_e	GSMM_103	EX_diact_e	('Neutral', 'Neutral')	Neutral	Neutral
1085	EX_4hbz_e	GSMM_343	EX_ala__D_e	GSMM_103	EX_diact_e	('Neutral', 'Neutral')	Neutral	Neutral
1086	EX_4hbz_e	GSMM_351	EX_ala__D_e	GSMM_103	EX_diact_e	('Neutral', 'Neutral')	Neutral	Neutral
1088	EX_4hbz_e	GSMM_364	EX_ala__D_e	GSMM_103	EX_diact_e	('Neutral', 'Neutral')	Neutral	Neutral
1090	EX_4hbz_e	GSMM_382	EX_ala__D_e	GSMM_103	EX_diact_e	('Neutral', 'Neutral')	Neutral	Neutral
1091	EX_4hbz_e	GSMM_392	EX_ala__D_e	GSMM_103	EX_diact_e	('Neutral', 'Neutral')	Neutral	Neutral
1094	EX_4hbz_e	GSMM_030	EX_gua_e	GSMM_103	EX_diact_e	('Neutral', 'Neutral')	Neutral	Neutral
1095	EX_4hbz_e	GSMM_036	EX_gua_e	GSMM_103	EX_diact_e	('Neutral', 'Neutral')	Neutral	Neutral
1096	EX_4hbz_e	GSMM_037	EX_gua_e	GSMM_103	EX_diact_e	('Neutral', 'Neutral')	Neutral	Neutral
1097	EX_4hbz_e	GSMM_069	EX_gua_e	GSMM_103	EX_diact_e	('Neutral', 'Neutral')	Neutral	Neutral
1099	EX_4hbz_e	GSMM_119	EX_gua_e	GSMM_103	EX_diact_e	('Neutral', 'Neutral')	Neutral	Neutral
1100	EX_4hbz_e	GSMM_160	EX_gua_e	GSMM_103	EX_diact_e	('Neutral', 'Neutral')	Neutral	Neutral
1107	EX_4hbz_e	GSMM_269	EX_gua_e	GSMM_103	EX_diact_e	('Neutral', 'Neutral')	Neutral	Neutral
1108	EX_4hbz_e	GSMM_316	EX_gua_e	GSMM_103	EX_diact_e	('Neutral', 'Neutral')	Neutral	Neutral
1109	EX_4hbz_e	GSMM_357	EX_gua_e	GSMM_103	EX_diact_e	('Neutral', 'Neutral')	Neutral	Neutral
1110	EX_4hbz_e	GSMM_364	EX_gua_e	GSMM_103	EX_diact_e	('Neutral', 'Neutral')	Neutral	Neutral
1112	EX_4hbz_e	GSMM_055	EX_asp__D_e	GSMM_103	EX_diact_e	('Neutral', 'Neutral')	Neutral	Neutral
1113	EX_4hbz_e	GSMM_063	EX_asp__D_e	GSMM_103	EX_diact_e	('Neutral', 'Neutral')	Neutral	Neutral
1117	EX_4hbz_e	GSMM_343	EX_asp__D_e	GSMM_103	EX_diact_e	('Neutral', 'Neutral')	Neutral	Neutral
1120	EX_4hbz_e	GSMM_015	EX_ind3ac_e	GSMM_103	EX_diact_e	('Neutral', 'Neutral')	Neutral	Neutral
1121	EX_4hbz_e	GSMM_016	EX_ind3ac_e	GSMM_103	EX_diact_e	('Neutral', 'Neutral')	Neutral	Neutral
1124	EX_4hbz_e	GSMM_030	EX_ind3ac_e	GSMM_103	EX_diact_e	('Neutral', 'Neutral')	Neutral	Neutral
1125	EX_4hbz_e	GSMM_036	EX_ind3ac_e	GSMM_103	EX_diact_e	('Neutral', 'Neutral')	Neutral	Neutral
1126	EX_4hbz_e	GSMM_037	EX_ind3ac_e	GSMM_103	EX_diact_e	('Neutral', 'Neutral')	Neutral	Neutral
1128	EX_4hbz_e	GSMM_049	EX_ind3ac_e	GSMM_103	EX_diact_e	('Neutral', 'Neutral')	Neutral	Neutral
1129	EX_4hbz_e	GSMM_051	EX_ind3ac_e	GSMM_103	EX_diact_e	('Neutral', 'Neutral')	Neutral	Neutral
1130	EX_4hbz_e	GSMM_055	EX_ind3ac_e	GSMM_103	EX_diact_e	('Neutral', 'Neutral')	Neutral	Neutral
1132	EX_4hbz_e	GSMM_063	EX_ind3ac_e	GSMM_103	EX_diact_e	('Neutral', 'Neutral')	Neutral	Neutral
1133	EX_4hbz_e	GSMM_069	EX_ind3ac_e	GSMM_103	EX_diact_e	('Neutral', 'Neutral')	Neutral	Neutral
1134	EX_4hbz_e	GSMM_076	EX_ind3ac_e	GSMM_103	EX_diact_e	('Neutral', 'Neutral')	Neutral	Neutral
1137	EX_4hbz_e	GSMM_102	EX_ind3ac_e	GSMM_103	EX_diact_e	('Neutral', 'Neutral')	Neutral	Neutral
1139	EX_4hbz_e	GSMM_122	EX_ind3ac_e	GSMM_103	EX_diact_e	('Neutral', 'Neutral')	Neutral	Neutral
1140	EX_4hbz_e	GSMM_135	EX_ind3ac_e	GSMM_103	EX_diact_e	('Neutral', 'Neutral')	Neutral	Neutral
1142	EX_4hbz_e	GSMM_157	EX_ind3ac_e	GSMM_103	EX_diact_e	('Neutral', 'Neutral')	Neutral	Neutral
1146	EX_4hbz_e	GSMM_186	EX_ind3ac_e	GSMM_103	EX_diact_e	('Neutral', 'Neutral')	Neutral	Neutral
1149	EX_4hbz_e	GSMM_230	EX_ind3ac_e	GSMM_103	EX_diact_e	('Neutral', 'Neutral')	Neutral	Neutral
1155	EX_4hbz_e	GSMM_269	EX_ind3ac_e	GSMM_103	EX_diact_e	('Neutral', 'Neutral')	Neutral	Neutral
1156	EX_4hbz_e	GSMM_277	EX_ind3ac_e	GSMM_103	EX_diact_e	('Neutral', 'Neutral')	Neutral	Neutral
1160	EX_4hbz_e	GSMM_316	EX_ind3ac_e	GSMM_103	EX_diact_e	('Neutral', 'Neutral')	Neutral	Neutral
1161	EX_4hbz_e	GSMM_323	EX_ind3ac_e	GSMM_103	EX_diact_e	('Neutral', 'Neutral')	Neutral	Neutral
1162	EX_4hbz_e	GSMM_343	EX_ind3ac_e	GSMM_103	EX_diact_e	('Neutral', 'Neutral')	Neutral	Neutral
1163	EX_4hbz_e	GSMM_344	EX_ind3ac_e	GSMM_103	EX_diact_e	('Neutral', 'Neutral')	Neutral	Neutral
1164	EX_4hbz_e	GSMM_345	EX_ind3ac_e	GSMM_103	EX_diact_e	('Neutral', 'Neutral')	Neutral	Neutral
1165	EX_4hbz_e	GSMM_351	EX_ind3ac_e	GSMM_103	EX_diact_e	('Neutral', 'Neutral')	Neutral	Neutral
1167	EX_4hbz_e	GSMM_357	EX_ind3ac_e	GSMM_103	EX_diact_e	('Neutral', 'Neutral')	Neutral	Neutral
1168	EX_4hbz_e	GSMM_358	EX_ind3ac_e	GSMM_103	EX_diact_e	('Neutral', 'Neutral')	Neutral	Neutral
1170	EX_4hbz_e	GSMM_382	EX_ind3ac_e	GSMM_103	EX_diact_e	('Neutral', 'Neutral')	Neutral	Neutral
1171	EX_4hbz_e	GSMM_392	EX_ind3ac_e	GSMM_103	EX_diact_e	('Neutral', 'Neutral')	Neutral	Neutral
1173	EX_4hbz_e	GSMM_015	EX_meoh_e	GSMM_103	EX_diact_e	('Neutral', 'Neutral')	Neutral	Neutral
1174	EX_4hbz_e	GSMM_037	EX_meoh_e	GSMM_103	EX_diact_e	('Neutral', 'Neutral')	Neutral	Neutral
1175	EX_4hbz_e	GSMM_049	EX_meoh_e	GSMM_103	EX_diact_e	('Neutral', 'Neutral')	Neutral	Neutral
1176	EX_4hbz_e	GSMM_069	EX_meoh_e	GSMM_103	EX_diact_e	('Neutral', 'Neutral')	Neutral	Neutral
1179	EX_4hbz_e	GSMM_122	EX_meoh_e	GSMM_103	EX_diact_e	('Neutral', 'Neutral')	Neutral	Neutral
1180	EX_4hbz_e	GSMM_127	EX_meoh_e	GSMM_103	EX_diact_e	('Neutral', 'Neutral')	Neutral	Neutral
1181	EX_4hbz_e	GSMM_135	EX_meoh_e	GSMM_103	EX_diact_e	('Neutral', 'Neutral')	Neutral	Neutral
1186	EX_4hbz_e	GSMM_186	EX_meoh_e	GSMM_103	EX_diact_e	('Neutral', 'Neutral')	Neutral	Neutral
1194	EX_4hbz_e	GSMM_316	EX_meoh_e	GSMM_103	EX_diact_e	('Neutral', 'Neutral')	Neutral	Neutral
1195	EX_4hbz_e	GSMM_323	EX_meoh_e	GSMM_103	EX_diact_e	('Neutral', 'Neutral')	Neutral	Neutral
1196	EX_4hbz_e	GSMM_343	EX_meoh_e	GSMM_103	EX_diact_e	('Neutral', 'Neutral')	Neutral	Neutral
[truncated: 269,604+ more rows]

## Sheet: Overall_counts_of_paths
	GSMM1	GSMM2	count	class1	class2
[truncated: 3,972 more rows]
